# Supplementary material
Source: PubMed Central journal article supplement (PMC6026055)
Supplement: NIHMS956547-supplement-SI.pdf [file NIHMS956547-supplement-SI.pdf]

# Enantioselective Remote *Meta*-C–H Arylation and Alkylation *via* a Chiral Transient Mediator

Hang Shi, Alastair N. Herron, Ying Shao, Qian Shao, and Jin-Quan Yu\*

*Department of Chemistry, The Scripps Research Institute, 10550 N. Torrey Pines Road. La Jolla, CA 92037, USA.*

## TABLE OF CONTENTS

|                                                                                         |     |
|-----------------------------------------------------------------------------------------|-----|
| GENERAL INFORMATION .....                                                               | 2   |
| EXPERIMENTAL SECTION.....                                                               | 3   |
| I. Desymmetrization of Diarylmethyl Amines .....                                        | 3   |
| A. Preparation of Substrates.....                                                       | 3   |
| B. Optimization of the Reaction Conditions .....                                        | 7   |
| C. Pd/(+)-NBE-CO <sub>2</sub> Me Catalyzed Desymmetrization of Diarylmethyl Amines..... | 9   |
| D. Directing Group Cleavage of Desymmetrization Product <b>2ae</b> .....                | 31  |
| E. Mechanistic Studies .....                                                            | 32  |
| II. Enantioselective Remote C–H Activation of Homobenzylamines.....                     | 39  |
| A. Preparation of Substrates.....                                                       | 39  |
| B. Optimization of the Reaction Conditions .....                                        | 43  |
| C. Pd/(+)-NBE-CO <sub>2</sub> Me Catalyzed Desymmetrization of Homobenzylamines .....   | 44  |
| D. Pd/(+)-NBE-CO <sub>2</sub> Me Catalyzed Kinetic Resolution of Homobenzylamines.....  | 52  |
| X-RAY CRYSTALLOGRAPHIC DATA .....                                                       | 58  |
| NMR SPECTRA .....                                                                       | 64  |
| SFC TRACES.....                                                                         | 184 |
| REFERENCES .....                                                                        | 269 |

## GENERAL INFORMATION

### Solvents

Dry chloroform, dichloromethane (DCM), tetrahydrofuran (THF), 1,4-dioxane, and *tert*-butylmethylether (TBME) were purchased from Sigma-Aldrich. Chloroform-*d*<sub>1</sub>, acetonitrile-*d*<sub>3</sub>, and acetone-*d*<sub>6</sub> were purchased from Cambridge Isotope Laboratories.

### Chromatography

Analytical thin layer chromatography was performed on 0.25 mm silica gel 60-F254. Visualization was carried out with UV light and Vogel's permanganate.

### Spectroscopy and Instruments

<sup>1</sup>H NMR was recorded on Bruker DRX-600 instrument (600 MHz). Chemical shifts were quoted in parts per million (ppm) referenced to 7.26 ppm of chloroform-*d*, the center peak of the pentet at 1.94 ppm of acetonitrile-*d*<sub>3</sub>, or the center peak of a pentet at 2.05 ppm of acetone-*d*<sub>6</sub>. <sup>13</sup>C NMR spectra were recorded on Bruker DRX-600 instrument (150 MHz), and were fully decoupled by broad band proton decoupling. Chemical shifts were reported in ppm referenced to the center peak of a triplet at 77.16 ppm of chloroform-*d*, the center peak of a septet at 1.32 ppm of acetonitrile-*d*<sub>3</sub>, or the center peak of a septet at 29.84 ppm of acetone-*d*<sub>6</sub>. <sup>19</sup>F NMR spectra were recorded on Bruker AMX-400 instrument (376 MHz), and were fully decoupled by broad band proton decoupling. The following abbreviations (or combinations thereof) were used to explain multiplicities: s = singlet, d = doublet, t = triplet, q = quartet, p = pentet, sext = sextet, sep = septet, m = multiplet, br = broad. Coupling constants, *J*, were reported in Hertz unit (Hz). High-resolution mass spectra (HRMS) were recorded on an Agilent Mass spectrometer using ESI-TOF (electrospray ionization-time of flight). Enantiomeric ratios (er) were determined on the Agilent Technologies supercritical fluid chromatography (SFC) system using commercially available chiral columns. The single crystal X-ray diffraction studies were carried out on a Bruker Kappa APEX-II CCD diffractometer equipped with Mo K $\alpha$  radiation ( $\lambda = 0.71073$ ).

### Starting materials

All substrates were used as received from commercial suppliers, unless otherwise stated. Pd(OAc)<sub>2</sub> and AgOAc were purchased from Sigma-Aldrich. Methyl (1*S*,4*R*)-bicyclo[2.2.1]hept-2-ene-2-carboxylate ((+)-NBE-CO<sub>2</sub>Me,  $[\alpha]_D^{25.5} = +237$ . (*c* = 1.0, CHCl<sub>3</sub>)) was synthesized from (1*S*,2*R*,3*S*,4*R*)-3-(methoxycarbonyl)bicyclo[2.2.1]hept-5-ene-2-carboxylic acid<sup>34</sup> (98% ee after crystallization<sup>35</sup>) following literature procedures<sup>36</sup>.

## EXPERIMENTAL SECTION

## I. Desymmetrization of Diarylmethyl Amines

## A. Preparation of Substrates

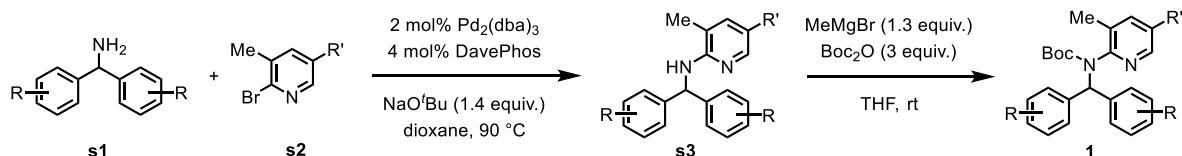

Diarylmethyl amines (**s1**) were synthesized following the literature procedures<sup>37</sup>. 2-Bromopyridines (**S2**) are commercial available.

**General procedure for synthesis of substrates:** Amine **s1** (1 equiv.), Pd<sub>2</sub>(dba)<sub>3</sub> (2 mol%), DavePhos (4 mol%) and NaO<sup>t</sup>Bu (1.4 equiv.) were added to a flame-dried Schlenk tube. The Schlenk tube was evacuated and back-filled with nitrogen. 2-Bromopyridines **s2** (1 equiv.) and 1,4-dioxane (0.33 M) were added to the mixture. The Schlenk tube was immersed into a pre-heated oil bath at 90 °C. After 2 h, the oil bath was removed, and the Schlenk tube was allowed to cool to room temperature. Water was added to the reaction mixture, which was then extracted with EtOAc. The combined organic layers were dried with Na<sub>2</sub>SO<sub>4</sub>. After the organic solvent was concentrated by rotary evaporation, the residue was purified by silica gel chromatography to afford compound **s3**.

To a solution of compound **s3** (1 equiv.) in THF (0.2 M) was added MeMgBr (1.3 equiv.) at 0 °C, and the resulting mixture was allowed to warm up to room temperature and stirred for 30 min. Then Boc<sub>2</sub>O (3 equiv.) was added into the mixture. The resulting mixture was allowed to warm up to room temperature and stirred for 12 hours. Water was added into the reaction mixture, which was then extracted with EtOAc. The combined organic layers were dried with Na<sub>2</sub>SO<sub>4</sub>. After the organic solvent was concentrated by rotary evaporation, the residue was purified by silica gel chromatography to afford compound **1**.

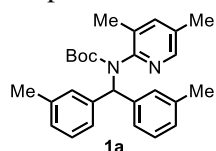**tert-Butyl (di-*m*-tolylmethyl)(3,5-dimethylpyridin-2-yl)carbamate (1a)**

Chromatography eluent: hexane/EtOAc = 15:1 v/v.

<sup>1</sup>H NMR (600 MHz, Acetonitrile-*d*<sub>3</sub>) δ 8.13–8.02 (m, 1H), 7.58 (s, 1H), 7.44 (s, 1H), 7.25 (s, 1H), 7.21–7.15 (m, 1H), 7.08 (s, 1H), 7.02–6.76 (m, 4H), 6.40 (s, 1H), 2.32 (s, 3H), 2.18 (s, 3H), 2.12 (s, 3H), 1.94 (s, 3H), 1.25 (s, 9H); <sup>13</sup>C NMR (150 MHz, Acetonitrile-*d*<sub>3</sub>) δ 154.74, 151.62, 146.71, 143.66, 140.22, 138.41, 137.97, 133.28, 132.72, 131.86, 129.66, 128.85, 128.63, 128.26, 126.11, 80.91, 67.70, 28.33, 21.58, 21.24, 17.71, 17.67. HRMS (ESI-TOF) *m/z* calc'd for C<sub>27</sub>H<sub>33</sub>N<sub>2</sub>O<sub>2</sub> [M+H]<sup>+</sup>: 417.2537; found: 417.2550.

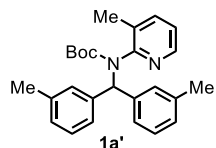**tert-Butyl (di-*m*-tolylmethyl)(3-methylpyridin-2-yl)carbamate (1a')**

Chromatography eluent: hexane/EtOAc = 15:1 v/v.

<sup>1</sup>H NMR (600 MHz, Acetonitrile-*d*<sub>3</sub>) δ 8.24 (dd, *J* = 4.8, 1.8 Hz, 1H), 7.59 (s, 1H), 7.46 (s, 1H), 7.36 (dd, *J* = 7.6, 1.8 Hz, 1H), 7.25 (s, 1H), 7.14–6.73 (m, 6H), 6.43 (s, 1H), 2.32 (s, 3H), 2.12 (s, 3H), 2.00 (s, 3H), 1.26 (s, 9H); <sup>13</sup>C NMR (150 MHz, Acetonitrile-*d*<sub>3</sub>) δ 154.47, 153.85, 146.45, 143.41, 139.97, 139.62, 138.26, 137.93,

133.45, 131.70, 129.55, 128.69, 128.52, 128.17, 126.00, 123.41, 80.91, 67.55, 28.18, 21.40, 21.15, 17.68. HRMS (ESI-TOF)  $m/z$  calc'd for  $C_{26}H_{31}N_2O_2$   $[M+H]^+$ : 403.2380; found: 403.2390.

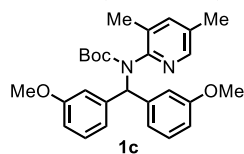

**tert-Butyl (bis(3-methoxyphenyl)methyl)(3,5-dimethylpyridin-2-yl)carbamate (1c)**

Chromatography eluent: hexane/EtOAc = 8:1 v/v.

$^1H$  NMR (600 MHz, Acetonitrile- $d_3$ )  $\delta$  8.09 (d,  $J$  = 2.3 Hz, 1H), 7.54 (s, 1H), 7.30–7.09 (m, 3H), 6.99 (s, 1H), 6.82 (s, 1H), 6.76–6.52 (m, 3H), 6.43 (s, 1H), 3.79 (s, 3H), 3.57 (s, 3H), 2.18 (s, 3H), 1.97 (s, 3H), 1.26 (s, 9H);  $^{13}C$  NMR (150 MHz, Acetonitrile- $d_3$ )  $\delta$  160.63, 159.88, 154.73, 151.48, 146.81, 145.35, 141.61, 140.34, 133.42, 132.87, 129.95, 129.47, 123.56, 121.32, 116.64, 114.91, 113.83, 112.82, 81.01, 67.48, 55.81, 55.74, 28.36, 17.74. HRMS (ESI-TOF)  $m/z$  calc'd for  $C_{27}H_{35}N_2O_4$   $[M+H]^+$ : 449.2435; found: 449.2445.

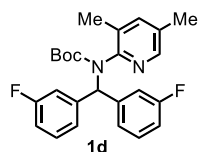

**tert-Butyl (bis(3-fluorophenyl)methyl)(3,5-dimethylpyridin-2-yl)carbamate (1d)**

Chromatography eluent: hexane/EtOAc = 15:1 v/v.

$^1H$  NMR (600 MHz, Acetonitrile- $d_3$ )  $\delta$  8.08 (d,  $J$  = 2.3 Hz, 1H), 7.70 (d,  $J$  = 6.4 Hz, 1H), 7.51–7.29 (m, 2H), 7.23 (d,  $J$  = 2.3 Hz, 1H), 7.12 (s, 1H), 7.04 (s, 1H), 6.96 (s, 1H), 6.91–6.73 (m, 2H), 6.51 (s, 1H), 2.19 (s, 3H), 1.99 (s, 3H), 1.27 (s, 9H);  $^{13}C$  NMR (150 MHz, Acetonitrile- $d_3$ )  $\delta$  163.75 (d,  $J$  = 243.5 Hz), 162.95 (d,  $J$  = 245.9 Hz), 154.52, 151.08, 146.87, 145.96, 142.43, 140.54, 133.63, 132.69, 130.86, 130.36, 127.04, 125.10, 117.74 (d,  $J$  = 22.2 Hz), 115.98 (d,  $J$  = 23.7 Hz), 115.02 (d,  $J$  = 21.5 Hz), 114.57 (d,  $J$  = 22.2 Hz), 81.47, 66.55, 28.29, 17.72, 17.64;  $^{19}F$  NMR (376 MHz, Acetonitrile- $d_3$ )  $\delta$  -115.10, -115.68. HRMS (ESI-TOF)  $m/z$  calc'd for  $C_{25}H_{27}F_2N_2O_2$   $[M+H]^+$ : 425.2035; found: 425.2043.

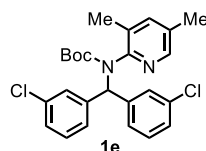

**tert-Butyl (bis(3-chlorophenyl)methyl)(3,5-dimethylpyridin-2-yl)carbamate (1e)**

Chromatography eluent: hexane/EtOAc = 20:1 v/v.

$^1H$  NMR (600 MHz, Acetonitrile- $d_3$ )  $\delta$  8.08 (d,  $J$  = 2.3 Hz, 1H), 7.87 (s, 1H), 7.58 (s, 1H), 7.42–7.26 (m, 2H), 7.24 (d,  $J$  = 2.3 Hz, 1H), 7.21–6.95 (m, 4H), 6.47 (s, 1H), 2.19 (s, 3H), 1.98 (s, 3H), 1.27 (s, 9H);  $^{13}C$  NMR (150 MHz, Acetonitrile- $d_3$ )  $\delta$  154.46, 151.06, 146.90, 145.22, 141.94, 140.57, 134.54, 133.89, 133.71, 132.64, 130.94, 130.80, 130.26, 129.53, 129.09, 128.27, 127.99, 127.70, 81.57, 66.51, 28.28, 17.72, 17.60. HRMS (ESI-TOF)  $m/z$  calc'd for  $C_{25}H_{27}Cl_2N_2O_2$   $[M+H]^+$ : 457.1444; found: 457.1452.

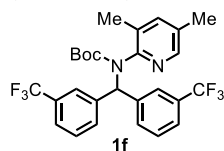

**tert-Butyl (bis(3-(trifluoromethyl)phenyl)methyl)(3,5-dimethylpyridin-2-yl)carbamate (1f)**

Chromatography eluent: hexane/EtOAc = 15:1 v/v.

$^1H$  NMR (600 MHz, Acetonitrile- $d_3$ )  $\delta$  8.17 (s, 1H), 8.06 (d,  $J$  = 2.4 Hz, 1H), 7.95 (s, 1H), 7.72–7.51 (m, 2H), 7.50–7.25 (m, 4H), 7.21 (d,  $J$  = 2.3 Hz, 1H), 6.67 (s, 1H), 2.17 (s, 3H), 1.96 (s, 3H), 1.26 (s, 9H);  $^{13}C$  NMR (150 MHz, Acetonitrile- $d_3$ )  $\delta$  154.44, 150.91, 146.98, 143.91, 140.79, 140.60, 134.86, 133.85, 133.09, 132.62,



131.12, 130.90, 130.68, 130.33, 130.06, 129.59, 127.74, 126.42, 125.95, 125.10, 124.85, 124.62, 81.71, 66.56, 28.23, 17.66, 17.48;  $^{19}\text{F}$  NMR (376 MHz, Acetonitrile- $d_3$ )  $\delta$  -63.37, -63.65. HRMS (ESI-TOF)  $m/z$  calc'd for  $\text{C}_{27}\text{H}_{27}\text{F}_6\text{N}_2\text{O}_2$   $[\text{M}+\text{H}]^+$ : 525.1971; found: 525.1972.

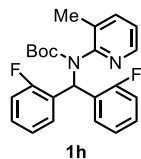

**tert-Butyl (bis(3-chlorophenyl)methyl)(3,5-dimethylpyridin-2-yl)carbamate (1e)**

Chromatography eluent: hexane/EtOAc = 20:1 v/v.

$^1\text{H}$  NMR (600 MHz, Acetonitrile- $d_3$ )  $\delta$  8.65 (s, 1H), 8.18 (dd,  $J$  = 4.9, 1.8 Hz, 1H), 7.77–6.20 (m, 10H), 2.11 (s, 3H), 1.29 (s, 9H);  $^{13}\text{C}$  NMR (150 MHz, Acetonitrile- $d_3$ )  $\delta$  161.10 (d,  $J$  = 245.2 Hz), 154.33, 152.63, 146.44, 140.00, 134.13, 133.46, 131.68, 130.41, 124.70, 123.63, 115.66 (d,  $J$  = 21.9 Hz), 81.67, 53.64, 28.25, 17.24;  $^{19}\text{F}$  NMR (376 MHz, Acetonitrile- $d_3$ )  $\delta$  -118.43, -119.60. HRMS (ESI-TOF)  $m/z$  calc'd for  $\text{C}_{24}\text{H}_{25}\text{F}_2\text{N}_2\text{O}_2$   $[\text{M}+\text{H}]^+$ : 411.1879; found: 411.1890.

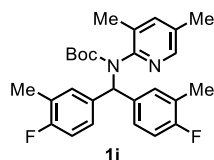

**tert-Butyl (bis(4-fluoro-3-methylphenyl)methyl)(3,5-dimethylpyridin-2-yl)carbamate (1i)**

Chromatography eluent: hexane/EtOAc = 20:1 v/v.

$^1\text{H}$  NMR (600 MHz, Acetonitrile- $d_3$ )  $\delta$  8.03 (d,  $J$  = 2.3 Hz, 1H), 7.59 (s, 1H), 7.46 (s, 1H), 7.16 (d,  $J$  = 2.3 Hz, 1H), 7.09–6.77 (m, 3H), 6.69 (s, 1H), 6.35 (s, 1H), 2.21 (s, 3H), 2.14 (s, 3H), 2.00 (s, 3H), 1.90 (s, 3H), 1.22 (s, 9H);  $^{13}\text{C}$  NMR (150 MHz, Acetonitrile- $d_3$ )  $\delta$  161.09 (d,  $J$  = 242.6 Hz), 154.60, 151.32, 146.77, 140.37, 139.23, 135.88, 134.38, 133.49, 132.72, 132.21, 130.25, 128.13, 125.00 (d,  $J$  = 15.5 Hz), 124.61 (d,  $J$  = 12.6 Hz), 115.20 (d,  $J$  = 22.8 Hz), 114.73 (d,  $J$  = 22.9 Hz), 81.13, 66.32, 28.34, 17.72, 17.62, 14.74, 14.33;  $^{19}\text{F}$  NMR (376 MHz, Acetonitrile- $d_3$ )  $\delta$  -121.40, -122.73. HRMS (ESI-TOF)  $m/z$  calc'd for  $\text{C}_{27}\text{H}_{31}\text{F}_2\text{N}_2\text{O}_2$   $[\text{M}+\text{H}]^+$ : 453.2348; found: 453.2361.

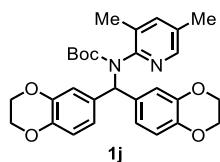

**tert-Butyl (bis(2,3-dihydrobenzo[b][1,4]dioxin-6-yl)methyl)(3,5-dimethylpyridin-2-yl)carbamate (1j)**

Chromatography eluent: hexane/EtOAc = 4:1 v/v.

$^1\text{H}$  NMR (600 MHz, Acetonitrile- $d_3$ )  $\delta$  8.10 (d,  $J$  = 2.3 Hz, 1H), 7.38 (s, 1H), 7.25 (d,  $J$  = 2.3 Hz, 1H), 7.07 (s, 1H), 6.82 (s, 1H), 6.55 (s, 3H), 6.27 (s, 1H), 4.26 (s, 4H), 4.13 (s, 4H), 2.23 (s, 3H), 1.98 (s, 3H), 1.29 (s, 9H);  $^{13}\text{C}$  NMR (150 MHz, Acetonitrile- $d_3$ )  $\delta$  154.65, 151.53, 146.71, 144.16, 143.57, 143.35, 140.33, 137.09, 133.32, 132.76, 123.97, 121.83, 119.94, 117.82, 117.42, 116.88, 80.85, 66.49, 65.28, 65.16, 28.38, 17.76, 17.74. HRMS (ESI-TOF)  $m/z$  calc'd for  $\text{C}_{25}\text{H}_{27}\text{Cl}_2\text{N}_2\text{O}_2$   $[\text{M}+\text{H}]^+$ : 457.1444; found: 457.1452.

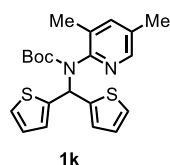

**tert-Butyl (di(thiophen-2-yl)methyl)(3,5-dimethylpyridin-2-yl)carbamate (1k)**

Chromatography eluent: hexane/EtOAc = 15:1 v/v.

$^1\text{H}$  NMR (600 MHz, Acetonitrile- $d_3$ )  $\delta$  8.11 (d,  $J$  = 2.3 Hz, 1H), 7.36 (s, 1H), 7.33 (d,  $J$  = 2.3 Hz, 1H), 7.29–7.10 (m, 2H), 6.96 (s, 1H), 6.92–6.74 (m, 3H), 2.25 (s, 3H), 1.95 (s, 3H), 1.32 (s, 9H);  $^{13}\text{C}$  NMR (150 MHz, Acetonitrile- $d_3$ )  $\delta$  154.00, 151.57, 147.06, 145.75, 144.49, 140.60, 133.66, 132.40, 128.27, 127.02, 126.81, 126.74, 81.77, 58.94, 28.34, 17.80, 17.63. HRMS (ESI-TOF)  $m/z$  calc'd for  $\text{C}_{21}\text{H}_{25}\text{N}_2\text{O}_2\text{S}_2$   $[\text{M}+\text{H}]^+$ : 401.1352; found: 401.1360.

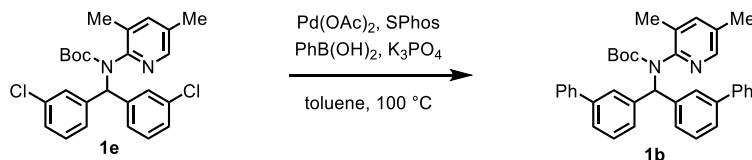

***tert*-Butyl (di([1,1'-biphenyl]-3-yl)methyl)(3,5-dimethylpyridin-2-yl)carbamate (**1b**)**

Aryl chloride **1e** (0.23 g, 0.5 mmol, 1 equiv.),  $\text{Pd}(\text{OAc})_2$  (5.6 mg, 0.025 mmol, 5 mol%), SPhos (21 mg, 0.05 mmol, 10 mol%),  $\text{PhB}(\text{OH})_2$  (0.244 g, 2.0 mmol, 4.0 equiv.), and  $\text{K}_3\text{PO}_4$  (0.53 g, 2.5 mmol, 5.0 equiv.) were added to a flame-dried Schlenk tube. The Schlenk tube was evacuated and back-filled with nitrogen, and then toluene (4 mL) were added to the mixture. The Schlenk tube was immersed into a pre-heated oil bath at 100 °C. After 12 h, the oil bath was removed, and the Schlenk tube was allowed to cool to room temperature. Water was added into the reaction mixture, which was then extracted with EtOAc. The combined organic layers were dried with  $\text{Na}_2\text{SO}_4$ . After the organic solvent was concentrated by rotatory evaporation, the residue was purified by silica gel chromatography (hexane/EtOAc = 12:1 v/v) to afford 0.19 g compound **1b** as a white solid (70% yield).  $^1\text{H}$  NMR (600 MHz, Acetonitrile- $d_3$ )  $\delta$  8.29–8.09 (m, 2H), 7.72–7.06 (m, 18H), 6.67 (s, 1H), 2.16 (s, 3H), 1.98 (s, 3H), 1.28 (s, 9H);  $^{13}\text{C}$  NMR (150 MHz, Acetonitrile- $d_3$ )  $\delta$  154.83, 151.45, 146.97, 144.28, 141.98, 141.50, 141.15, 140.68, 140.42, 133.62, 132.99, 130.45, 130.07, 129.88, 129.58, 129.16, 128.11, 127.82, 127.71, 126.81, 126.19, 81.16, 67.52, 28.38, 17.71. HRMS (ESI-TOF)  $m/z$  calc'd for  $\text{C}_{37}\text{H}_{37}\text{N}_2\text{O}_2$   $[\text{M}+\text{H}]^+$ : 541.2850; found: 541.2854.

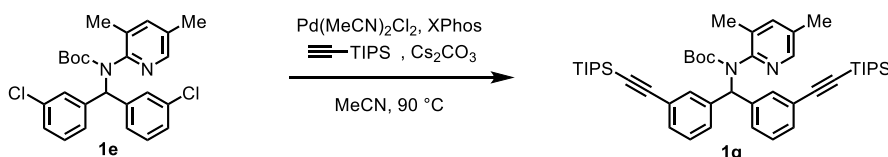

***tert*-Butyl (bis(3-((triisopropylsilyl)ethynyl)phenyl)methyl)(3,5-dimethylpyridin-2-yl)carbamate (**1g**)**

Aryl chloride **1e** (0.183 g, 0.4 mmol, 1 equiv.),  $\text{Pd}(\text{MeCN})_2\text{Cl}_2$  (10 mg, 0.04 mmol, 10 mol%), XPhos (38 mg, 0.08 mmol, 20 mol%), and  $\text{Cs}_2\text{CO}_3$  (0.65 g, 2.0 mmol, 5.0 equiv.) were added to a flame-dried Schlenk tube. The Schlenk tube was evacuated and back-filled with nitrogen. Ethynyltriisopropylsilane (0.36 mL, 1.6 mmol, 4.0 equiv.) and MeCN (3 mL) were added to the mixture. The Schlenk tube was immersed into a pre-heated oil bath at 90 °C. After 12 h, the oil bath was removed, and the Schlenk tube was allowed to cool to room temperature. Water was added into the reaction mixture, which was then extracted with EtOAc. The combined organic layers were dried with  $\text{Na}_2\text{SO}_4$ . After the organic solvent was concentrated by rotatory evaporation, the residue was purified by silica gel chromatography (hexane/EtOAc = 20:1 v/v) to afford 0.18 g compound **1g** as a yellow liquid (60% yield).

$^1\text{H}$  NMR (600 MHz, Acetone- $d_6$ )  $\delta$  8.11 (d,  $J$  = 2.2 Hz, 1H), 7.98 (s, 1H), 7.73 (s, 1H), 7.49–7.06 (m, 7H), 6.56 (s, 1H), 2.21 (s, 3H), 2.02 (s, 3H), 1.28 (s, 9H), 1.13 (s, 42H);  $^{13}\text{C}$  NMR (150 MHz, Acetone- $d_6$ )  $\delta$  154.12, 151.67, 146.79, 143.03, 140.79, 140.34, 134.36, 132.98, 132.13, 131.26, 131.08, 129.79, 128.99, 128.69,

123.81, 123.39, 108.63, 108.12, 90.45, 80.93, 66.85, 28.29, 19.01, 17.69, 17.63, 12.02. HRMS (ESI-TOF)  $m/z$  calc'd for  $C_{47}H_{69}N_2O_2Si_2$   $[M+H]^+$ : 749.4892; found: 749.4891.

## B. Optimization of the Reaction Conditions

Table S1. Chiral transient mediator screening\*

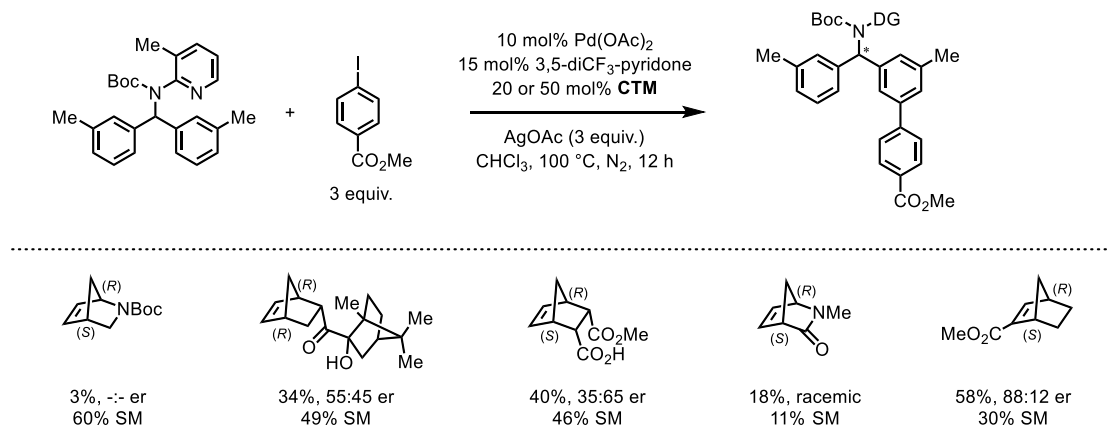

\*The yields were determined by <sup>1</sup>H-NMR using  $CH_2Br_2$  as the standard.

Table S2. Ligand screening\*

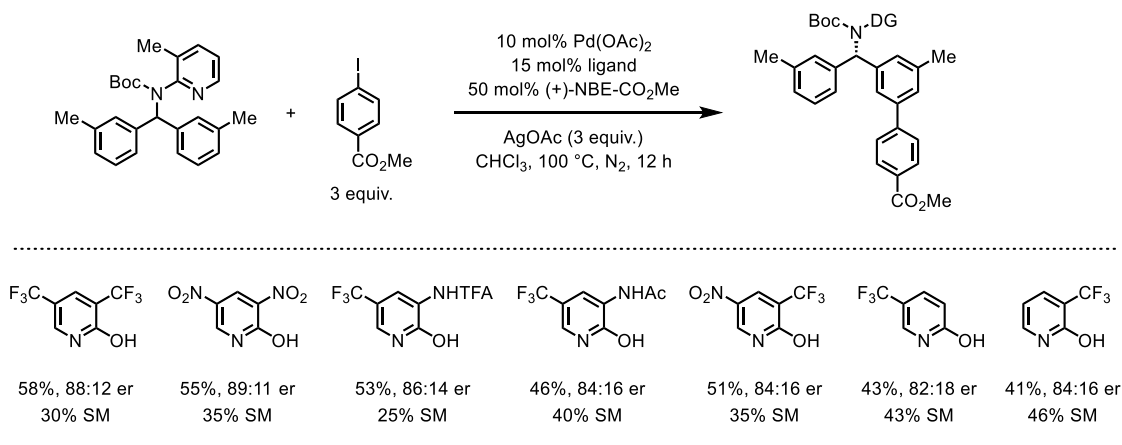

\*The yields were determined by <sup>1</sup>H-NMR using  $CH_2Br_2$  as the standard.

Table S3. Directing group screening\*

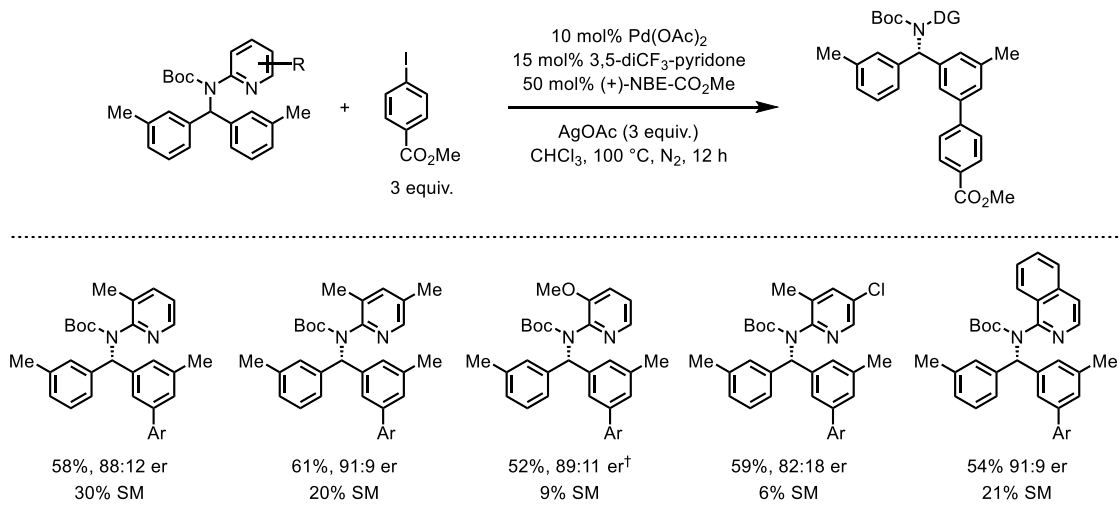

\*The yields were determined by <sup>1</sup>H-NMR using CH<sub>2</sub>Br<sub>2</sub> as the standard. †80 °C.

Table S4. Salt screening\*

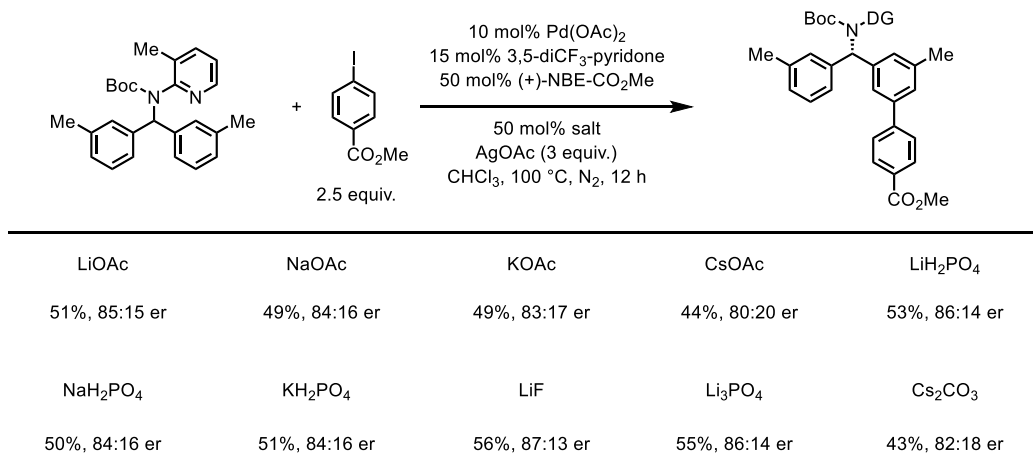

\*The yields were determined by <sup>1</sup>H-NMR using CH<sub>2</sub>Br<sub>2</sub> as the standard.

Table S5. Additive screening\*

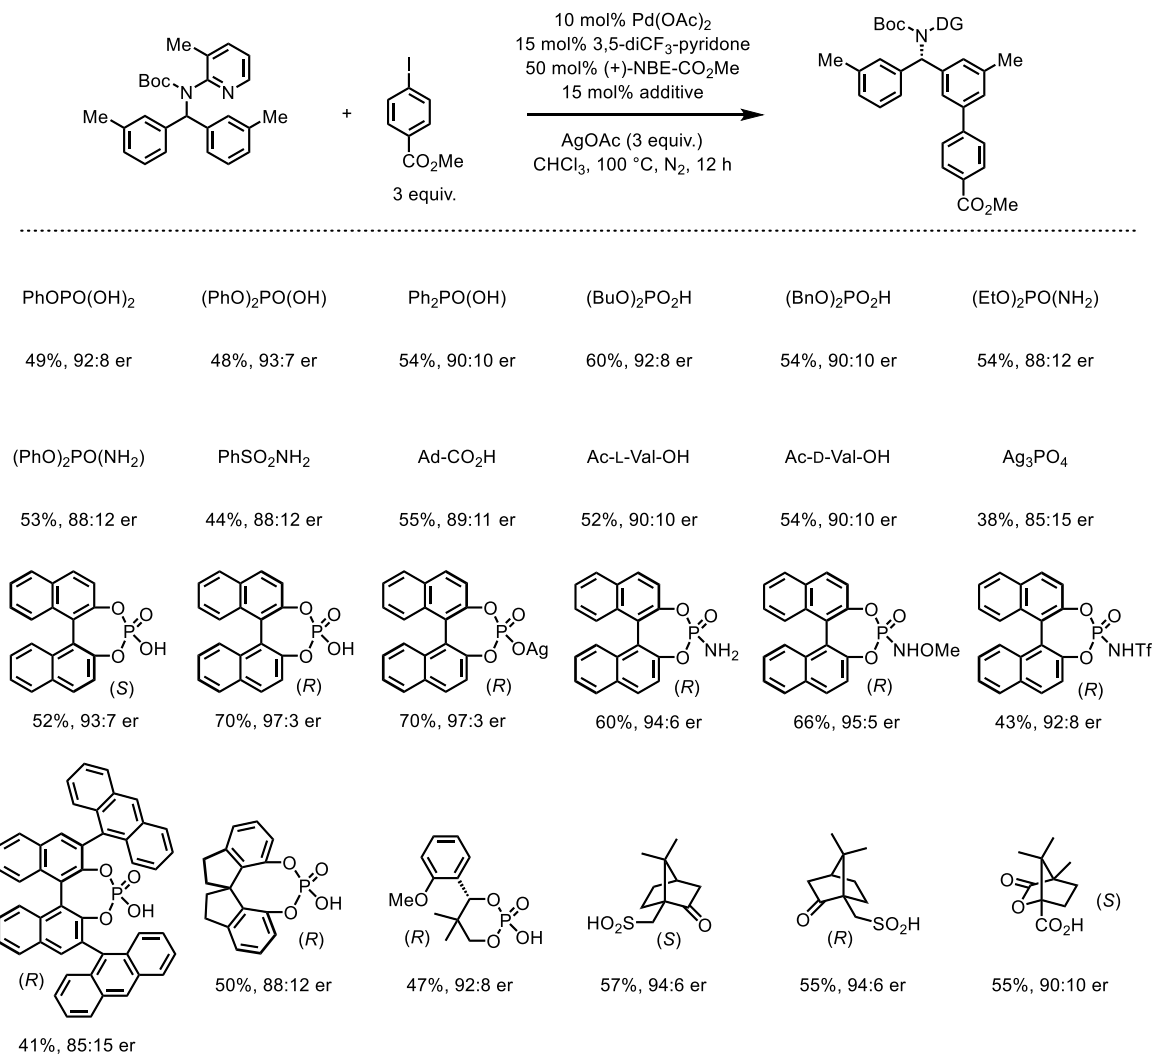\*The yields were determined by <sup>1</sup>H-NMR using CH<sub>2</sub>Br<sub>2</sub> as the standard.

Table S6. Additive screening\*

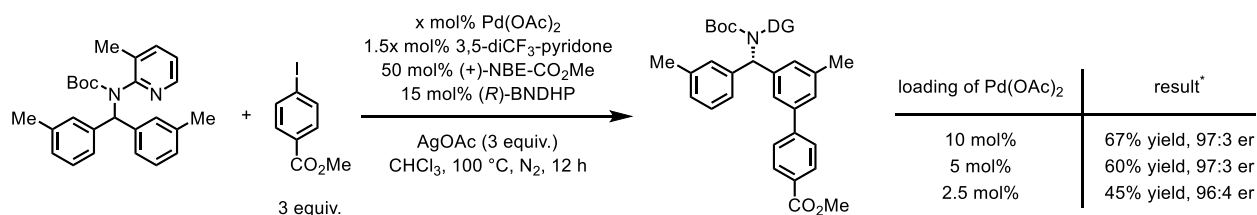

\*Isolated yield

C. Pd/(+)-NBE-CO<sub>2</sub>Me Catalyzed Desymmetrization of Diarylmethyl Amines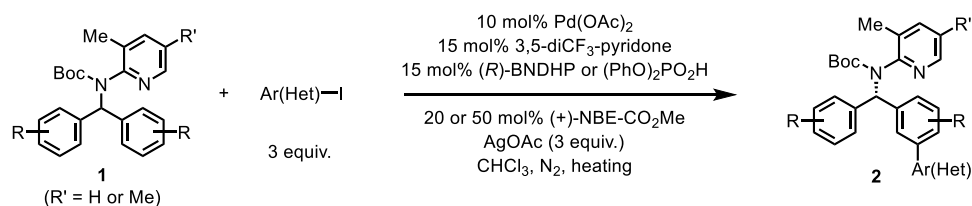

**General procedure:** Arene **1** (0.10 mmol, 1.0 equiv), Pd(OAc)<sub>2</sub> (2.2 mg, 10 μmol, 10 mol%), Ligand (3.5 mg, 15 μmol, 15 mol%), hydrogenphosphate (15 μmol, 15 mol%), aryl iodide (0.3 mmol, 3.0 equiv.), and AgOAc (50 mg, 0.30 mmol, 3.0 equiv.) were added into a 2-dram reaction vial. CHCl<sub>3</sub> (0.5 mL) and (+)-NBE-CO<sub>2</sub>Me (20 mol% or 50 mol%) were added to the mixture. The vial was flushed with N<sub>2</sub>, and then capped. The reaction mixture was then stirred at given temperature for 12 or 18 hours. After cooling to room temperature, the mixture was filtered through Celite and eluted with EtOAc (3 × 2 mL). The filtrate was evaporated under reduced pressure. Purification by preparative TLC chromatography afforded the title compound.

In NMR spectra, the carbamate motif caused a broadening of certain peaks. After removing of *tert*-butoxycarbonyl (Boc) group, the peaks became sharp and clear (see compound **2q**).

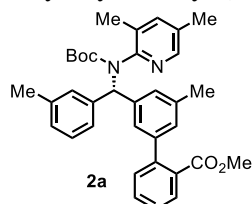

**Methyl (S)-3'-(((*tert*-butoxycarbonyl)(3,5-dimethylpyridin-2-yl)amino)(*m*-tolyl)methyl)-5'-methyl-[1,1'-biphenyl]-2-carboxylate (**2a**)**

Substrate **1a** was arylated following the general procedure by using (PhO)<sub>2</sub>PO<sub>2</sub>H (3.8 mg, 15 μmol, 15 mol%), methyl 2-iodobenzoate (22 μL, 0.15 mmol, 1.5 equiv.), AgOAc (33 mg, 0.2 mmol, 2.0 equiv.), (+)-NBE-CO<sub>2</sub>Me (3.0 mg, 20 μmol, 20 mol%), and CHCl<sub>3</sub> (1 mL) at 80 °C for 12 hours. After purification by preparative TLC chromatography (hexane/EtOAc = 4:1 v/v), compound **2a** (39.1 mg) was obtained in 71% yield as a colorless oil.

<sup>1</sup>H NMR (600 MHz, Acetonitrile-*d*<sub>3</sub>, 60 °C) δ 8.07 (s, 1H), 7.86–6.58 (m, 8H), 7.70 (d, *J* = 6.4 Hz, 1H), 7.54 (t, *J* = 7.0 Hz, 1H), 7.42 (t, *J* = 7.5 Hz, 1H), 7.19 (s, 1H), 6.44 (s, 1H), 3.54 (s, 3H), 2.47–2.10 (m, 6H), 2.19 (s, 3H), 1.95 (s, 3H), 1.27 (s, 9H); <sup>13</sup>C NMR (150 MHz, Acetonitrile-*d*<sub>3</sub>, 60 °C) δ 169.99, 155.05, 152.02, 146.98, 143.17, 141.83, 140.46, 138.45, 133.52, 133.06, 132.66, 132.23, 131.61, 130.42, 128.67, 128.32, 127.03, 81.22, 68.10, 52.60, 28.64, 21.57, 21.55, 17.86. HRMS (ESI-TOF) *m/z* calc'd for C<sub>35</sub>H<sub>39</sub>N<sub>2</sub>O<sub>4</sub> [M+H]<sup>+</sup>: 551.2904; found: 551.2906.

SFC Chiralpak<sup>®</sup> IC column (20% isopropanol, 2.0 mL/min) *t*<sub>r</sub> = 4.32 min (minor), 4.83 min (major): 97:3 er.

The absolute stereochemistry was assigned by analogy to compound **2ah**.

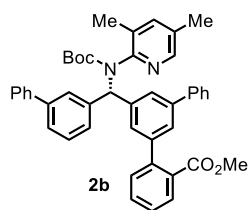

**Methyl (S)-5'-([1,1'-biphenyl]-3-yl(((*tert*-butoxycarbonyl)(3,5-dimethylpyridin-2-yl)amino)methyl)-[1,1':3',1''-terphenyl]-2-carboxylate (**2b**)**

Substrate **1b** was arylated following the general procedure by using (PhO)<sub>2</sub>PO<sub>2</sub>H (3.8 mg, 15 μmol, 15 mol%), methyl 2-iodobenzoate (44 μL, 0.3 mmol, 3.0 equiv.), and (+)-NBE-CO<sub>2</sub>Me (3.0 mg, 20 μmol, 20 mol%) at 80 °C for 12 hours. After purification by preparative TLC chromatography (hexane/EtOAc = 4:1 v/v), compound **2b** (43.9 mg) was obtained in 65% yield as a colorless oil.

<sup>1</sup>H NMR (600 MHz, Acetonitrile-*d*<sub>3</sub>, 60 °C) δ 8.15 (br s, 1H), 8.14 (s, 1H), 7.87–6.91 (m, 18 H), 7.75 (d, *J* = 7.8 Hz, 1H), 7.56 (t, *J* = 7.6 Hz, 1H), 7.21 (s, 1H), 6.72 (s, 1H), 3.48 (s, 3H), 2.18 (s, 3 H), 2.00 (s, 3 H), 1.31 (s, 9 H); <sup>13</sup>C NMR (150 MHz, Acetonitrile-*d*<sub>3</sub>, 60 °C) δ 169.78, 155.11, 151.86, 147.19, 142.93, 142.61, 142.08, 141.69, 141.52, 140.65, 133.81, 133.28, 132.55, 132.39, 131.74, 130.60, 130.09, 130.01, 129.50, 128.70, 128.58, 128.53, 128.04, 128.00, 126.69, 81.45, 67.97, 52.61, 28.69, 17.92, 17.88. HRMS (ESI-TOF) *m/z* calc'd for C<sub>45</sub>H<sub>43</sub>N<sub>2</sub>O<sub>4</sub> [M+H]<sup>+</sup>: 675.3217; found: 675.3215.

SFC Chiralpak® IC column (20% isopropanol, 2.0 mL/min)  $t_r$  = 7.12 min (minor), 7.85 min (major): 96:4 er. The absolute stereochemistry was assigned by analogy to compound **2ah**.

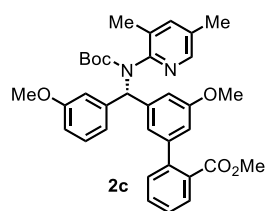

**Methyl (S)-3'-((((tert-butoxycarbonyl)(3,5-dimethylpyridin-2-yl)amino)(3-methoxyphenyl)methyl)-5'-methoxy-[1,1'-biphenyl]-2-carboxylate (2c)**

Substrate **1c** was arylated following the general procedure by using (PhO)<sub>2</sub>PO<sub>2</sub>H (3.8 mg, 15 μmol, 15 mol%), methyl 2-iodobenzoate (44 μL, 0.3 mmol, 3.0 equiv.), (+)-NBE-CO<sub>2</sub>Me (3.0 mg, 20 μmol, 20 mol%), and CHCl<sub>3</sub> (1.0 mL) at 60 °C for 12 hours. After purification by preparative TLC chromatography (hexane/EtOAc = 7:2 v/v), compound **2c** (35.1 mg) was obtained in 60% yield as a colorless oil.

<sup>1</sup>H NMR (600 MHz, Acetonitrile-*d*<sub>3</sub>, 60 °C) δ 8.09 (s, 1H), 7.76–6.50 (m, 8 H), 7.70 (d, *J* = 7.3 Hz, 1H), 7.54 (t, *J* = 7.1 Hz, 1H), 7.42 (t, *J* = 7.4 Hz, 1H), 7.22 (s, 1H), 6.46 (s, 1H), 3.72 (br s, 6H), 3.53 (s, 3H), 2.20 (s, 3H), 1.98 (s, 3H), 1.28 (s, 9H); <sup>13</sup>C NMR (150 MHz, Acetonitrile-*d*<sub>3</sub>, 60 °C) δ 169.87, 160.60, 155.03, 151.89, 147.05, 145.27, 143.15, 142.85, 140.57, 133.65, 133.18, 132.68, 132.22, 131.54, 130.39, 129.87, 128.49, 123.68, 122.24, 115.76, 113.83, 81.32, 67.92, 56.31, 56.10, 52.63, 28.66, 17.93, 17.87. HRMS (ESI-TOF) *m/z* calc'd for C<sub>35</sub>H<sub>39</sub>N<sub>2</sub>O<sub>6</sub> [M+H]<sup>+</sup>: 583.2803; found: 583.2798.

SFC Chiralpak® AD-3 column (12% isopropanol, 2.0 mL/min)  $t_r$  = 5.42 min (major), 6.91 min (minor): 95:5 er.

The absolute stereochemistry was assigned by analogy to compound **2ah**.

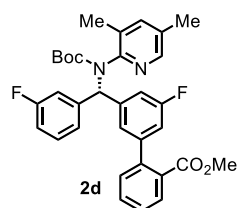

**Methyl (S)-3'-((((tert-butoxycarbonyl)(3,5-dimethylpyridin-2-yl)amino)(3-fluorophenyl)methyl)-5'-fluoro-[1,1'-biphenyl]-2-carboxylate (2d)**

Substrate **1d** was arylated following the general procedure by using (PhO)<sub>2</sub>PO<sub>2</sub>H (3.8 mg, 15 μmol, 15 mol%), methyl 2-iodobenzoate (44 μL, 0.3 mmol, 3.0 equiv.), and (+)-NBE-CO<sub>2</sub>Me (3.0 mg, 20 μmol, 20 mol%) at 80 °C for 12 hours. After purification by preparative TLC chromatography (hexane/EtOAc = 4:1 v/v), compound **2d** (30.0 mg) was obtained in 54% yield as a colorless oil.

<sup>1</sup>H NMR (600 MHz, Acetonitrile-*d*<sub>3</sub>, 60 °C) δ 8.08 (s, 1H), 7.85–6.61 (m, 8 H), 7.78 (d, *J* = 7.4 Hz, 1H), 7.57 (t, *J* = 7.3 Hz, 1H), 7.47 (t, *J* = 7.5 Hz, 1H), 7.26 (s, 1H), 6.53 (s, 1H), 3.56 (s, 3H), 2.20 (s, 3H), 2.00 (s, 3H), 1.29 (s, 9H); <sup>13</sup>C NMR (150 MHz, Acetonitrile-*d*<sub>3</sub>, 60 °C) δ 169.32, 163.61 (d, *J* = 247.5 Hz), 154.82, 151.48, 147.12, 144.33, 141.91, 140.79, 133.00, 132.55, 132.25, 131.62, 130.81, 129.02, 127.10, 126.00, 116.42, 115.01 (d, *J* = 14.6 Hz), 81.78, 67.02, 52.68, 28.59, 17.87, 17.84; <sup>19</sup>F NMR (376 MHz, Acetonitrile-*d*<sub>3</sub>) δ -115.02, -115.65, -115.77, -116.51. HRMS (ESI-TOF) *m/z* calc'd for C<sub>33</sub>H<sub>33</sub>F<sub>2</sub>N<sub>2</sub>O<sub>4</sub> [M+H]<sup>+</sup>: 559.2403; found: 559.2403.

SFC Chiralpak® AD-3 column (10% isopropanol, 2.0 mL/min)  $t_r$  = 3.78 min (major), 4.77 min (minor): 90:10 er.

The absolute stereochemistry was assigned by analogy to compound **2ah**.

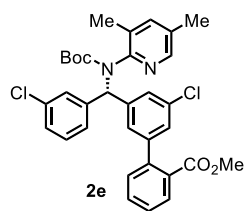

**Methyl (S)-3'-((((tert-butoxycarbonyl)(3,5-dimethylpyridin-2-yl)amino)(3-chlorophenyl)methyl)-5'-chloro-[1,1'-biphenyl]-2-carboxylate (2e)**

Substrate **1e** was arylated following the general procedure by using  $(\text{PhO})_2\text{PO}_2\text{H}$  (3.8 mg, 15  $\mu\text{mol}$ , 15 mol%), methyl 2-iodobenzoate (44  $\mu\text{L}$ , 0.3 mmol, 3.0 equiv.), and (+)-NBE- $\text{CO}_2\text{Me}$  (3.0 mg, 20  $\mu\text{mol}$ , 20 mol%) at 80  $^\circ\text{C}$  for 12 hours. After purification by preparative TLC chromatography (hexane/EtOAc = 4:1 v/v), compound **2e** (37.8 mg) was obtained in 64% yield as a colorless oil.

$^1\text{H}$  NMR (600 MHz, Acetonitrile- $d_3$ , 60  $^\circ\text{C}$ )  $\delta$  8.08 (s, 1H), 8.01–6.66 (m, 8 H), 7.79 (d,  $J = 7.4$  Hz, 1H), 7.57 (t,  $J = 7.3$  Hz, 1H), 7.47 (t,  $J = 7.5$  Hz, 1H), 7.26 (s, 1H), 6.50 (s, 1H), 3.57 (s, 3H), 2.20 (s, 3H), 1.99 (s, 3H), 1.29 (s, 9H);  $^{13}\text{C}$  NMR (150 MHz, Acetonitrile- $d_3$ , 60  $^\circ\text{C}$ )  $\delta$  169.19, 154.75, 151.43, 147.14, 144.12, 141.77, 140.80, 134.50, 133.94, 132.95, 132.62, 132.10, 131.65, 130.89, 130.62, 129.56, 129.09, 128.37, 128.11, 81.86, 66.94, 52.72, 28.59, 17.88, 17.80. HRMS (ESI-TOF)  $m/z$  calc'd for  $\text{C}_{33}\text{H}_{33}\text{Cl}_2\text{N}_2\text{O}_4$   $[\text{M}+\text{H}]^+$ : 559.2403; found: 559.2403.

SFC Chiralpak<sup>®</sup> AD-3 column (15% isopropanol, 2.0 mL/min)  $t_r = 3.63$  min (major), 4.31 min (minor): 92:8 er.

The absolute stereochemistry was assigned by analogy to compound **2ah**.

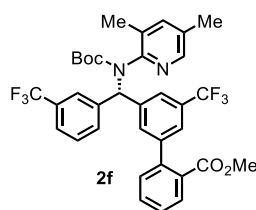

**Methyl (S)-3'-((((tert-butoxycarbonyl)(3,5-dimethylpyridin-2-yl)amino)(3-(trifluoromethyl)phenyl)methyl)-5'-(trifluoromethyl)-[1,1'-biphenyl]-2-carboxylate (2f)**

Substrate **1f** was arylated following the general procedure by using  $(\text{PhO})_2\text{PO}_2\text{H}$  (3.8 mg, 15  $\mu\text{mol}$ , 15 mol%), methyl 2-iodobenzoate (44  $\mu\text{L}$ , 0.3 mmol, 3.0 equiv.), and (+)-NBE- $\text{CO}_2\text{Me}$  (7.5 mg, 50  $\mu\text{mol}$ , 50 mol%) at 100  $^\circ\text{C}$  for 12 hours. After purification by preparative TLC chromatography (hexane/DCM/Et<sub>2</sub>O = 3:3:1 v/v/v), compound **2f** (46.0 mg) was obtained in 70% yield as a colorless oil.

$^1\text{H}$  NMR (600 MHz, Acetonitrile- $d_3$ , 60  $^\circ\text{C}$ )  $\delta$  8.06 (s, 1H), 8.36–6.93 (m, 10 H), 7.84 (d,  $J = 7.6$  Hz, 1H), 7.24 (s, 1H), 6.71 (s, 1H), 3.54 (s, 3H), 2.19 (s, 3H), 1.98 (s, 3H), 1.28 (s, 9H);  $^{13}\text{C}$  NMR (150 MHz, Acetonitrile- $d_3$ , 60  $^\circ\text{C}$ )  $\delta$  169.07, 154.74, 151.27, 147.21, 143.44, 141.73, 140.87, 134.94, 134.10, 133.67, 132.96, 132.80, 132.02, 131.78, 131.08, 129.98, 129.29, 126.44, 125.19, 82.01, 66.99, 52.63, 28.54, 17.82, 17.69;  $^{19}\text{F}$  NMR (376 MHz, Acetonitrile- $d_3$ )  $\delta$  -63.10, -63.28, -63.39, -63.50. HRMS (ESI-TOF)  $m/z$  calc'd for  $\text{C}_{35}\text{H}_{33}\text{F}_6\text{N}_2\text{O}_4$   $[\text{M}+\text{H}]^+$ : 659.2339; found: 659.2336.

SFC Chiralpak<sup>®</sup> OD-3 column (1% isopropanol, 3.0 mL/min)  $t_r = 7.52$  min (major), 12.33 min (minor): 90:10 er.

The absolute stereochemistry was assigned by analogy to compound **2ah**.

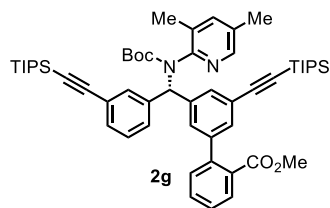



**Methyl (S)-3'-(((tert-butoxycarbonyl)(3,5-dimethylpyridin-2-yl)amino)(3-((triisopropylsilyl)ethynyl)phenyl)methyl)-5'-((triisopropylsilyl)ethynyl)-[1,1'-biphenyl]-2-carboxylate (2g)**

Substrate **1g** was arylated following the general procedure by using (PhO)<sub>2</sub>PO<sub>2</sub>H (3.8 mg, 15 μmol, 15 mol%), methyl 2-iodobenzoate (44 μL, 0.3 mmol, 3.0 equiv.), and (+)-NBE-CO<sub>2</sub>Me (3.0 mg, 20 μmol, 20 mol%) at 80 °C for 12 hours. After purification by preparative TLC chromatography (hexane/EtOAc = 6:1 v/v), compound **2g** (35.3 mg) was obtained in 40% yield as a yellow oil.

<sup>1</sup>H NMR (600 MHz, Acetonitrile-*d*<sub>3</sub>, 60 °C) δ 8.11–6.83 (m, 9H), 8.06 (s, 1H), 7.77 (d, *J* = 7.7 Hz, 1H), 7.56 (t, *J* = 7.7 Hz, 1H), 7.46 (t, *J* = 7.7 Hz, 1H), 6.49 (s, 1H), 3.56 (s, 3H), 2.20 (s, 3H), 1.98 (s, 3H), 1.28 (s, 9H), 1.14 (d, *J* = 7.2 Hz, 42H); <sup>13</sup>C NMR (150 MHz, Acetonitrile-*d*<sub>3</sub>, 60 °C) δ 169.44, 154.84, 151.71, 147.12, 142.56, 142.12, 140.74, 133.79, 132.91, 132.53, 132.30, 131.61, 131.47, 131.19, 130.76, 129.27, 128.88, 123.90, 108.32, 91.87, 91.62, 81.73, 67.20, 52.67, 28.62, 19.22, 17.93, 17.81, 12.41. HRMS (ESI-TOF) *m/z* calc'd for C<sub>55</sub>H<sub>75</sub>N<sub>2</sub>O<sub>4</sub>Si<sub>2</sub> [M+H]<sup>+</sup>: 883.5260; found: 883.5265.

SFC Chiralpak<sup>®</sup> OD-3 column (10% isopropanol, 2.0 mL/min) *t*<sub>r</sub> = 18.12 min (major), 20.46 min (minor): 93:7 er.

The absolute stereochemistry was assigned by analogy to compound **2ah**.

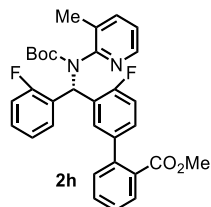**Methyl (S)-3'-(((tert-butoxycarbonyl)(3-methylpyridin-2-yl)amino)(2-fluorophenyl)methyl)-4'-fluoro-[1,1'-biphenyl]-2-carboxylate (2h)**

Substrate **1h** was arylated following the general procedure by using Pd(OAc)<sub>2</sub> (4.4 mg, 20 μmol, 20 mol%), Ligand (6.9 mg, 30 μmol, 30 mol%), (*R*)-BNDHP (10.4 mg, 30 μmol, 30 mol%), methyl 2-iodobenzoate (44 μL, 0.3 mmol, 3.0 equiv.), and (+)-NBE-CO<sub>2</sub>Me (7.5 mg, 50 μmol, 50 mol%) at 100 °C for 18 hours. After purification by preparative TLC chromatography (hexane/EtOAc = 4:1 v/v), compound **2h** (22.8 mg) was obtained in 42% yield as a colorless oil.

<sup>1</sup>H NMR (600 MHz, Acetonitrile-*d*<sub>3</sub>, 60 °C) δ 8.16 (d, *J* = 5.5 Hz, 1H), 7.92–6.64 (m, 10 H), 7.77 (d, *J* = 8.0 Hz, 1H), 7.56 (t, *J* = 7.6 Hz, 1H), 7.45 (t, *J* = 7.8 Hz, 1H), 7.40 (d, *J* = 7.6 Hz, 1H), 3.58 (s, 3H), 2.13 (s, 3H), 1.29 (s, 9H); <sup>13</sup>C NMR (150 MHz, Acetonitrile-*d*<sub>3</sub>, 60 °C) δ 169.59, 161.52 (d, *J* = 245.6 Hz), 160.88 (d, *J* = 246.0 Hz), 154.60, 152.94, 146.64, 142.33, 140.24, 138.30, 134.47, 133.06, 132.50, 132.35, 131.75, 130.81, 130.72, 130.31, 128.64, 124.82, 123.82, 115.91 (d, *J* = 22.1 Hz), 115.59 (d, *J* = 22.6 Hz), 81.95, 53.89, 52.70, 28.54, 17.44; <sup>19</sup>F NMR (376 MHz, Acetonitrile-*d*<sub>3</sub>, 60 °C) δ -118.31, -119.65, -120.95, -122.80. HRMS (ESI-TOF) *m/z* calc'd for C<sub>32</sub>H<sub>31</sub>F<sub>2</sub>N<sub>2</sub>O<sub>4</sub> [M+H]<sup>+</sup>: 545.2246; found: 545.2244.

SFC Chiralpak<sup>®</sup> IC column (5% isopropanol, 2.0 mL/min) *t*<sub>r</sub> = 12.54 min (minor), 13.87 min (major): 91:9 er.

The absolute stereochemistry was assigned by analogy to compound **2ah**.

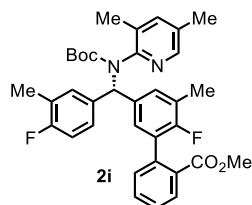**Methyl (S)-5'-(((tert-butoxycarbonyl)(3,5-dimethylpyridin-2-yl)amino)(4-fluoro-3-methylphenyl)methyl)-2'-fluoro-3'-methyl-[1,1'-biphenyl]-2-carboxylate (2i)**

Substrate **1i** was arylated following the general procedure by using (PhO)<sub>2</sub>PO<sub>2</sub>H (3.8 mg, 15 μmol, 15 mol%), methyl 2-iodobenzoate (44 μL, 0.3 mmol, 3.0 equiv.), and (+)-NBE-CO<sub>2</sub>Me (3.0 mg, 20 μmol, 20 mol%) at

100 °C for 12 hours. After purification by preparative TLC chromatography (hexane/EtOAc = 4:1 v/v), compound **2i** (42.1 mg) was obtained in 72% yield as a colorless oil.

<sup>1</sup>H NMR (600 MHz, Acetonitrile-*d*<sub>3</sub>, 60 °C) δ 8.07 (s, 1H), 7.87 (d, *J* = 7.8 Hz, 1H), 7.77–6.55 (m, 6H), 7.59 (t, *J* = 7.7 Hz, 1H), 7.48 (t, *J* = 7.6 Hz, 1H), 7.24 (s, 1H), 6.44 (s, 1H), 3.60 (s, 3H), 2.36–2.07 (m, 9H), 1.97 (s, 3H), 1.29 (s, 9H); <sup>13</sup>C NMR (150 MHz, Acetonitrile-*d*<sub>3</sub>, 60 °C) δ 168.80, 161.41 (d, *J* = 242.7 Hz), 158.02 (d, *J* = 242.7 Hz), 157.22, 154.92, 151.76, 147.03, 140.64, 137.60, 134.49, 133.72, 133.09, 132.86, 132.38, 130.91, 129.13, 125.07, 124.94, 124.80, 124.72, 115.15 (d, *J* = 18.5 Hz), 81.42, 66.76, 52.59, 28.65, 17.87, 17.84, 14.70. <sup>19</sup>F NMR (376 MHz, Acetonitrile-*d*<sub>3</sub>) δ -121.40, -122.73, -124.84, -126.36. HRMS (ESI-TOF) *m/z* calc'd for C<sub>35</sub>H<sub>37</sub>F<sub>2</sub>N<sub>2</sub>O<sub>4</sub> [M+H]<sup>+</sup>: 587.2716; found: 587.2715.

SFC Chiralpak<sup>®</sup> AD-3 column (20% isopropanol, 2.0 mL/min) *t*<sub>r</sub> = 2.09 min (major), 2.57 min (minor): 96:4 er.

The absolute stereochemistry was assigned by analogy to compound **2ah**.

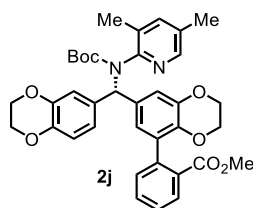

**Methyl (S)-2-(7-(((tert-butoxycarbonyl)(3,5-dimethylpyridin-2-yl)amino)(2,3-dihydrobenzo[b][1,4]dioxin-6-yl)methyl)-2,3-dihydrobenzo[b][1,4]dioxin-5-yl)benzoate (2j)**

Substrate **1j** was arylated following the general procedure by using (PhO)<sub>2</sub>PO<sub>2</sub>H (3.8 mg, 15 μmol, 15 mol%), methyl 2-iodobenzoate (44 μL, 0.3 mmol, 3.0 equiv.), and (+)-NBE-CO<sub>2</sub>Me (3.0 mg, 20 μmol, 20 mol%) at 80 °C for 12 hours. After purification by preparative TLC chromatography (hexane/EtOAc = 1:1 v/v), compound **2j** (33.1 mg) was obtained in 52% yield as a colorless oil.

<sup>1</sup>H NMR (600 MHz, Acetonitrile-*d*<sub>3</sub>, 60 °C) δ 8.09 (s, 1H), 7.77 (d, *J* = 7.7 Hz, 1H), 7.54 (t, *J* = 7.5 Hz, 1H), 7.47–6.35 (m, 6H), 7.41 (t, *J* = 7.6 Hz, 1H), 7.25 (s, 1H), 6.30 (s, 1H), 4.30–4.00 (m, 8H), 3.64 (s, 3H), 2.22 (s, 3H), 1.99 (s, 3H), 1.30 (s, 9H); <sup>13</sup>C NMR (150 MHz, Acetonitrile-*d*<sub>3</sub>, 60 °C) δ 169.20, 154.98, 152.00, 147.00, 144.23, 143.81, 140.60, 138.96, 133.55, 133.16, 132.57, 132.28, 130.88, 130.29, 128.49, 123.75, 117.34, 81.15, 66.97, 65.56, 65.44, 65.37, 52.50, 28.70, 17.96, 17.92. HRMS (ESI-TOF) *m/z* calc'd for C<sub>37</sub>H<sub>39</sub>N<sub>2</sub>O<sub>8</sub> [M+H]<sup>+</sup>: 639.2701; found: 639.2698.

SFC Chiralpak<sup>®</sup> AD-3 column (15% isopropanol, 2.0 mL/min) *t*<sub>r</sub> = 8.55 min (major), 10.37 min (minor): 94:6 er.

The absolute stereochemistry was assigned by analogy to compound **2ah**.

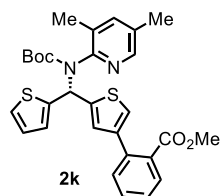

**Methyl (S)-2-(5-(((tert-butoxycarbonyl)(3,5-dimethylpyridin-2-yl)amino)(thiophen-2-yl)methyl)thiophen-3-yl)benzoate (2k)**

Substrate **1k** was arylated following the general procedure by using (PhO)<sub>2</sub>PO<sub>2</sub>H (3.8 mg, 15 μmol, 15 mol%), methyl 2-iodobenzoate (22 μL, 0.15 mmol, 1.5 equiv.), AgOAc (33 mg, 0.2 mmol, 2.0 equiv.), and (+)-NBE-CO<sub>2</sub>Me (3.0 mg, 20 μmol, 20 mol%) at 80 °C for 12 hours. After purification by preparative TLC chromatography (hexane/EtOAc = 4:1 v/v), compound **2k** (23.5 mg) was obtained in 44% yield as a colorless oil.

<sup>1</sup>H NMR (600 MHz, Acetonitrile-*d*<sub>3</sub>, 60 °C) δ 8.13 (s, 1H), 7.64 (d, *J* = 7.7 Hz, 1H), 7.52 (t, *J* = 7.6 Hz, 1H), 7.48–6.88 (m, 6H), 7.40 (t, *J* = 7.5 Hz, 1H), 7.35 (s, 1H), 6.84 (s, 1H), 3.66 (s, 3H), 2.27 (s, 3H), 2.02 (s, 3H),

1.36 (s, 9H);  $^{13}\text{C}$  NMR (150 MHz, Acetonitrile- $d_3$ , 60 °C)  $\delta$  170.29, 154.34, 151.91, 147.28, 145.17, 141.16, 140.82, 137.02, 133.89, 132.76, 132.72, 132.21, 131.22, 130.12, 129.64, 128.67, 128.43, 127.22, 126.98, 123.79, 82.13, 59.31, 52.86, 28.67, 17.94, 17.90. HRMS (ESI-TOF)  $m/z$  calc'd for  $\text{C}_{29}\text{H}_{31}\text{N}_2\text{O}_2\text{S}_2$   $[\text{M}+\text{H}]^+$ : 535.1720; found: 535.1721.

SFC Chiralpak<sup>®</sup> IC column (30% isopropanol, 2.0 mL/min)  $t_r$  = 4.13 min (major), 5.24 min (minor): 70:30 er. The absolute stereochemistry was assigned by analogy to compound **2ah**.

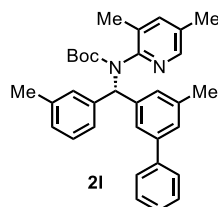

**tert-Butyl (S)-(3,5-dimethylpyridin-2-yl)((5-methyl-[1,1'-biphenyl]-3-yl)(*m*-tolyl)methyl)carbamate (**2l**)**

Substrate **1a** was arylated following the general procedure by using (*R*)-BNDHP (5.2 mg, 15  $\mu\text{mol}$ , 15 mol%), iodobenzene (33.6  $\mu\text{L}$ , 0.3 mmol, 3.0 equiv.), and (+)-NBE-CO<sub>2</sub>Me (7.5 mg, 50  $\mu\text{mol}$ , 50 mol%) at 100 °C for 18 hours. After purification by preparative TLC chromatography (toluene/EtOAc = 20:1 v/v), compound **2l** (30.6 mg) was obtained in 62% yield as a colorless oil.

$^1\text{H}$  NMR (600 MHz, Acetonitrile- $d_3$ , 60 °C)  $\delta$  8.12 (s, 1H), 7.98–6.72 (m, 11H), 7.33 (t,  $J$  = 7.5 Hz, 1H), 7.19 (s, 1H), 6.49 (s, 1H), 2.41–2.12 (m, 6H), 2.19 (s, 3H), 1.97 (s, 3H), 1.29 (s, 9H);  $^{13}\text{C}$  NMR (150 MHz, Acetonitrile- $d_3$ , 60 °C)  $\delta$  155.10, 152.06, 147.03, 142.30, 141.58, 140.46, 139.11, 138.47, 133.56, 133.07, 129.97, 128.76, 128.65, 128.42, 127.97, 127.28, 81.23, 68.10, 28.65, 21.61, 17.86. HRMS (ESI-TOF)  $m/z$  calc'd for  $\text{C}_{33}\text{H}_{37}\text{N}_2\text{O}_2$   $[\text{M}+\text{H}]^+$ : 493.2850; found: 493.2848.

SFC Chiralpak<sup>®</sup> IC column (20% isopropanol, 2.0 mL/min)  $t_r$  = 3.85 min (minor), 4.59 min (major): 97:3 er. The absolute stereochemistry was assigned by analogy to compound **2ah**.

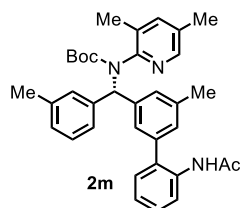

**tert-Butyl (S)-((2'-acetamido-5-methyl-[1,1'-biphenyl]-3-yl)(*m*-tolyl)methyl)(3,5-dimethylpyridin-2-yl)carbamate (**2m**)**

Substrate **1a** was arylated following the general procedure by using (*R*)-BNDHP (5.2 mg, 15  $\mu\text{mol}$ , 15 mol%), aryl iodide (78.3 mg, 0.3 mmol, 3.0 equiv.), and (+)-NBE-CO<sub>2</sub>Me (7.5 mg, 50  $\mu\text{mol}$ , 50 mol%) at 100 °C for 18 hours. After purification by preparative TLC chromatography (hexane/EtOAc = 1:1 v/v), compound **2m** (41.3 mg) was obtained in 62% yield as a colorless oil.

$^1\text{H}$  NMR (600 MHz, Acetonitrile- $d_3$ , 60 °C)  $\delta$  8.07 (s, 1H), 7.90 (s, 1H), 7.83–6.67 (m, 11H), 7.32 (t,  $J$  = 8.0 Hz, 1H), 6.48 (s, 1H), 2.53–2.11 (m, 6H), 2.20 (s, 3H), 1.96 (s, 3H), 1.84 (s, 3H), 1.28 (s, 9H);  $^{13}\text{C}$  NMR (150 MHz, Acetonitrile- $d_3$ , 60 °C)  $\delta$  169.63, 155.05, 151.99, 147.00, 140.49, 139.24, 138.51, 136.34, 135.56, 133.59, 133.09, 131.16, 129.31, 128.92, 128.80, 125.91, 124.89, 81.27, 68.04, 28.65, 24.29, 21.61, 17.88. HRMS (ESI-TOF)  $m/z$  calc'd for  $\text{C}_{35}\text{H}_{40}\text{N}_3\text{O}_3$   $[\text{M}+\text{H}]^+$ : 550.3064; found: 550.3068.

SFC Chiralpak<sup>®</sup> AD-3 column (15% isopropanol, 1.0 mL/min)  $t_r$  = 11.05 min (major), 12.83 min (major): 92:8 er.

The absolute stereochemistry was assigned by analogy to compound **2ah**.

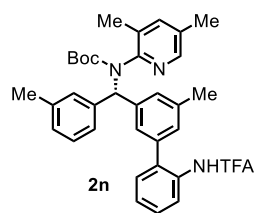

**tert-Butyl (S)-(3,5-dimethylpyridin-2-yl)((5-methyl-2'-((2,2,2-trifluoroacetamido)-[1,1'-biphenyl]-3-yl)(m-tolyl)methyl)carbamate (2n)**

Substrate **1a** was arylated following the general procedure by using (*R*)-BNDHP (5.2 mg, 15  $\mu$ mol, 15 mol%), aryl iodide (94.4 mg, 0.3 mmol, 3.0 equiv.), and (+)-NBE-CO<sub>2</sub>Me (7.5 mg, 50  $\mu$ mol, 50 mol%) at 100 °C for 18 hours. After purification by preparative TLC chromatography (hexane/EtOAc = 4:1 v/v), compound **2n** (27.8 mg) was obtained in 46% yield as a colorless oil.

<sup>1</sup>H NMR (600 MHz, Acetonitrile-*d*<sub>3</sub>, 60 °C)  $\delta$  8.56 (br s, 1H), 8.08 (s, 1H), 7.83–6.59 (m, 8H), 7.73 (s, 1H), 7.43 (t, *J* = 7.8 Hz, 1H), 7.38 (t, *J* = 7.4 Hz, 1H), 7.20 (s, 1H), 6.47 (s, 1H), 2.47–2.11 (m, 6H), 2.20 (s, 3H), 1.94 (s, 3H), 1.28 (s, 9H); <sup>13</sup>C NMR (150 MHz, Acetonitrile-*d*<sub>3</sub>, 60 °C)  $\delta$  156.38 (q, *J* = 36.9 Hz), 151.97, 147.01, 140.49, 139.00, 138.49, 138.15, 133.58, 133.07, 133.03, 131.62, 129.41, 128.95, 128.75, 128.59, 126.19, 118.15 (q, *J* = 288.2 Hz), 81.29, 68.00, 28.63, 21.51, 17.85, 17.83. <sup>19</sup>F NMR (376 MHz, Acetonitrile-*d*<sub>3</sub>)  $\delta$  -76.72, -76.82. HRMS (ESI-TOF) *m/z* calc'd for C<sub>35</sub>H<sub>37</sub>F<sub>3</sub>N<sub>3</sub>O<sub>3</sub> [M+H]<sup>+</sup>: 604.2782; found: 604.2779.

SFC Chiralpak<sup>®</sup> IC column (10% isopropanol, 2.0 mL/min) *t*<sub>r</sub> = 5.15 min (minor), 5.89 min (major): 90:10 er. The absolute stereochemistry was assigned by analogy to compound **2ah**.

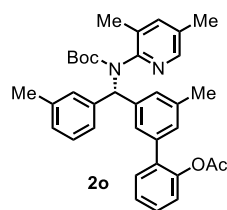

**(S)-3'-(((tert-Butoxycarbonyl)(3,5-dimethylpyridin-2-yl)amino)(m-tolyl)methyl)-5'-methyl-[1,1'-biphenyl]-2-yl acetate (2o)**

Substrate **1a** was arylated following the general procedure by using (*R*)-BNDHP (5.2 mg, 15  $\mu$ mol, 15 mol%), aryl iodide (78.6 mg, 0.3 mmol, 3.0 equiv.), and (+)-NBE-CO<sub>2</sub>Me (7.5 mg, 50  $\mu$ mol, 50 mol%) at 100 °C for 18 hours. After purification by preparative TLC chromatography (hexane/EtOAc = 4:1 v/v), compound **2o** (23.1 mg) was obtained in 42% yield as a colorless oil.

<sup>1</sup>H NMR (600 MHz, Acetonitrile-*d*<sub>3</sub>, 60 °C)  $\delta$  8.07 (s, 1H), 7.18 (s, 1H), 7.68–6.78 (m, 11H), 2.35 (d, *J* = 35.6 Hz, 3H), 2.22–2.09 (m, 6H), 1.93 (s, 3H), 1.90 (s, 3H), 1.25 (s, 9H); <sup>13</sup>C NMR (150 MHz, Acetonitrile-*d*<sub>3</sub>, 60 °C)  $\delta$  170.31, 155.06, 152.01, 149.20, 146.98, 140.48, 138.55, 138.20, 136.03, 133.53, 133.04, 131.75, 129.59, 128.98, 128.84, 128.73, 127.45, 124.30, 81.25, 68.14, 28.65, 21.59, 21.09, 17.86. HRMS (ESI-TOF) *m/z* calc'd for C<sub>35</sub>H<sub>39</sub>N<sub>2</sub>O<sub>4</sub> [M+H]<sup>+</sup>: 551.2904; found: 551.2900.

SFC Chiralpak<sup>®</sup> AD-3 column (20% isopropanol/hexane (v/v = 1/1), 2.0 mL/min) *t*<sub>r</sub> = 3.68 min (major), 4.18 min (minor): 71:29 er.

The absolute stereochemistry was assigned by analogy to compound **2ah**.

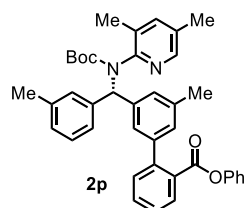

**Phenyl (S)-3'-(((tert-butoxycarbonyl)(3,5-dimethylpyridin-2-yl)amino)(m-tolyl)methyl)-5'-methyl-[1,1'-biphenyl]-2-carboxylate (2p)**

Substrate **1a** was arylated following the general procedure by using  $(\text{PhO})_2\text{PO}_2\text{H}$  (3.8 mg, 15  $\mu\text{mol}$ , 15 mol%), aryl iodide (48.6 mg, 0.15 mmol, 1.5 equiv.), AgOAc (33 mg, 0.2 mmol, 2.0 equiv.), and (+)-NBE-CO<sub>2</sub>Me (3.0 mg, 20  $\mu\text{mol}$ , 20 mol%) at 80 °C for 12 hours. After purification by preparative TLC chromatography (hexane/EtOAc = 4:1 v/v), compound **2p** (39.9 mg) was obtained in 65% yield as a white solid.

<sup>1</sup>H NMR (600 MHz, Acetonitrile-*d*<sub>3</sub>, 60 °C)  $\delta$  8.04 (s, 1H), 7.92 (d, *J* = 7.8 Hz, 1H), 7.79–6.66 (m, 11H), 7.62 (t, *J* = 7.6 Hz, 1H), 7.51 (t, *J* = 7.6 Hz, 1H), 7.34 (t, *J* = 7.7 Hz, 2H), 7.23 (t, *J* = 7.5 Hz, 1H), 6.48 (s, 1H), 2.48–2.08 (m, 6H), 2.15 (s, 3H), 1.92 (s, 3H), 1.26 (s, 9H); <sup>13</sup>C NMR (150 MHz, Acetonitrile-*d*<sub>3</sub>, 60 °C)  $\delta$  168.23, 155.04, 152.13, 151.99, 146.98, 143.65, 141.85, 140.48, 138.41, 133.47, 132.98, 132.88, 131.80, 131.00, 130.49, 128.99, 128.65, 128.54, 126.96, 122.63, 81.23, 68.04, 28.64, 21.56, 17.87. HRMS (ESI-TOF) *m/z* calc'd for C<sub>40</sub>H<sub>41</sub>N<sub>2</sub>O<sub>4</sub> [M+H]<sup>+</sup>: 613.3061; found: 613.3055.

SFC Chiralpak<sup>®</sup> AD-3 column (20% isopropanol, 2.0 mL/min) *t*<sub>r</sub> = 3.53 min (major), 5.47 min (minor): 98:2 er.

The absolute stereochemistry was assigned by analogy to compound **2ah**.

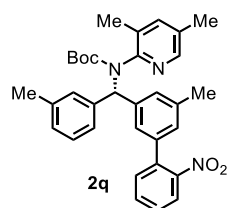

**tert-Butyl (S)-(3,5-dimethylpyridin-2-yl)((5-methyl-2'-nitro-[1,1'-biphenyl]-3-yl)(m-tolyl)methyl)carbamate (2q)**

Substrate **1a** was arylated following the general procedure by using  $(\text{PhO})_2\text{PO}_2\text{H}$  (3.8 mg, 15  $\mu\text{mol}$ , 15 mol%), aryl iodide (37.4 mg, 0.15 mmol, 1.5 equiv.), AgOAc (33 mg, 0.2 mmol, 2.0 equiv.), and (+)-NBE-CO<sub>2</sub>Me (3.0 mg, 20  $\mu\text{mol}$ , 20 mol%) at 80 °C for 12 hours. After purification by preparative TLC chromatography (hexane/EtOAc = 4:1 v/v), compound **2q** (39.9 mg) was obtained in 62% yield as a yellow oil.

<sup>1</sup>H NMR (600 MHz, Acetonitrile-*d*<sub>3</sub>, 60 °C)  $\delta$  8.08 (s, 1H), 7.96–6.69 (m, 8H), 7.84 (d, *J* = 8.1 Hz, 1H), 7.66 (t, *J* = 7.7 Hz, 1H), 7.53 (t, *J* = 7.8 Hz, 1H), 7.20 (s, 1H), 6.45 (s, 1H), 2.45–2.10 (m, 6H), 2.20 (s, 3H), 1.96 (s, 3H), 1.28 (s, 9H); <sup>13</sup>C NMR (150 MHz, Acetonitrile-*d*<sub>3</sub>, 60 °C)  $\delta$  154.99, 151.89, 150.64, 147.00, 140.49, 139.00, 138.47, 138.26, 137.19, 133.58, 133.52, 132.98, 131.91, 130.17, 129.58, 128.74, 128.08, 126.63, 125.09, 81.29, 67.91, 28.64, 21.49, 17.88, 17.85. HRMS (ESI-TOF) *m/z* calc'd for C<sub>353</sub>H<sub>36</sub>N<sub>3</sub>O<sub>4</sub> [M+H]<sup>+</sup>: 538.2700; found: 538.2694.

SFC Chiralpak<sup>®</sup> IC column (15% isopropanol, 2.0 mL/min) *t*<sub>r</sub> = 6.06 min (minor), 5.87 min (major): 96:4 er.

The absolute stereochemistry was assigned by analogy to compound **2ah**.

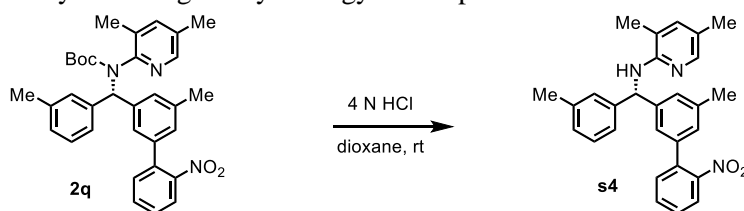

**(S)-3,5-Dimethyl-N-((5-methyl-2'-nitro-[1,1'-biphenyl]-3-yl)(m-tolyl)methyl)pyridin-2-amine (s4)**

To a solution of **2q** (27 mg, 0.05 mmol) was dissolved in dioxane (0.25 mL), HCl solution (4 N in dioxane) was added. The reaction mixture was stirred at room temperature for 3 hours. Aqueous NaHCO<sub>3</sub> solution was added into the reaction mixture, which was then extracted with EtOAc. The combined organic layers were washed with aqueous NaCl solution, and then dried over Na<sub>2</sub>SO<sub>4</sub>. The organic solvent was concentrated by rotatory. After purification by preparative TLC chromatography (hexane/EtOAc = 4:1 v/v), compound **s4** (19.1 mg) was obtained in 85% yield as a yellow liquid.

$^1\text{H}$  NMR (600 MHz, Chloroform-*d*)  $\delta$  7.80–7.75 (m, 2H), 7.55 (td,  $J = 7.6, 1.3$  Hz, 1H), 7.43 (td,  $J = 7.8, 1.4$  Hz, 1H), 7.40 (dd,  $J = 7.7, 1.4$  Hz, 1H), 7.20 (t,  $J = 7.5$  Hz, 1H), 7.16 (s, 1H), 7.14–7.10 (m, 2H), 7.09–7.04 (m, 3H), 7.02 (s, 1H), 6.43 (d,  $J = 6.9$  Hz, 1H), 4.49 (d,  $J = 6.9$  Hz, 1H), 2.33 (d,  $J = 8.8$  Hz, 6H), 2.13 (d,  $J = 5.8$  Hz, 6H);  $^{13}\text{C}$  NMR (150 MHz, Chloroform-*d*)  $\delta$  154.09, 149.73, 145.24, 144.43, 143.62, 138.78, 138.53, 138.44, 137.36, 136.67, 132.29, 132.12, 128.74, 128.70, 128.66, 128.14, 128.10, 127.46, 124.88, 124.33, 124.15, 121.99, 116.38, 58.64, 21.76, 17.59, 17.26. HRMS (ESI-TOF)  $m/z$  calc'd for  $\text{C}_{28}\text{H}_{28}\text{N}_3\text{O}_2$   $[\text{M}+\text{H}]^+$ : 468.2176; found: 468.2182.

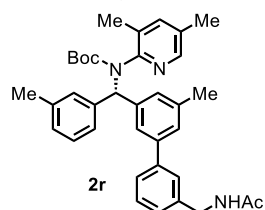

***tert*-Butyl (S)-((3'-(acetamidomethyl)-5-methyl-[1,1'-biphenyl]-3-yl)(*m*-tolyl)methyl)(3,5-dimethylpyridin-2-yl)carbamate (2r)**

Substrate **1a** was arylated following the general procedure by using (*R*)-BNDHP (5.2 mg, 15  $\mu\text{mol}$ , 15 mol%), aryl iodide (82.5 mg, 0.3 mmol, 3.0 equiv.), and (+)-NBE-CO<sub>2</sub>Me (7.5 mg, 50  $\mu\text{mol}$ , 50 mol%) at 100 °C for 18 hours. After purification by preparative TLC chromatography (hexane/EtOAc = 1:6 v/v), compound **2r** (39.6 mg) was obtained in 70% yield as a colorless oil.

$^1\text{H}$  NMR (600 MHz, Acetonitrile-*d*<sub>3</sub>, 60 °C)  $\delta$  8.13 (s, 1H), 8.05–6.62 (m, 9H), 7.37 (t,  $J = 7.7$  Hz, 1H), 7.25 (d,  $J = 7.2$  Hz, 1H), 7.19 (dd,  $J = 1.8$  Hz,  $J = 0.6$  Hz, 1H), 6.73 (s, 1H), 6.48 (s, 1H), 4.37 (d,  $J = 6.0$  Hz, 2H), 2.47–2.13 (m, 6H), 2.19 (s, 3H), 1.97 (s, 3H), 1.92 (s, 3H), 1.29 (s, 9H);  $^{13}\text{C}$  NMR (150 MHz, Acetonitrile-*d*<sub>3</sub>, 60 °C)  $\delta$  170.82, 155.11, 152.03, 147.06, 142.44, 141.48, 141.39, 140.47, 139.11, 138.48, 133.56, 133.06, 130.07, 128.81, 128.67, 127.56, 127.29, 127.14, 126.64, 81.25, 68.10, 44.03, 28.67, 23.25, 21.62, 17.88. HRMS (ESI-TOF)  $m/z$  calc'd for  $\text{C}_{36}\text{H}_{42}\text{N}_3\text{O}_3$   $[\text{M}+\text{H}]^+$ : 564.3221; found: 564.3229.

SFC Chiralpak<sup>®</sup> OJ column (20% isopropanol, 2.0 mL/min)  $t_r$  = 3.17 min (minor), 3.68 min (major): 95:5 er. The absolute stereochemistry was assigned by analogy to compound **2ah**.

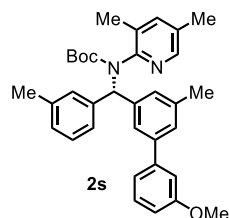

***tert*-Butyl (S)-((3-(3-methoxy-5-methyl-[1,1'-biphenyl]-3-yl)(*m*-tolyl)methyl)(3,5-dimethylpyridin-2-yl)carbamate (2s)**

Substrate **1a** was arylated following the general procedure by using (*R*)-BNDHP (5.2 mg, 15  $\mu\text{mol}$ , 15 mol%), aryl iodide (70.2 mg, 0.3 mmol, 3.0 equiv.), and (+)-NBE-CO<sub>2</sub>Me (7.5 mg, 50  $\mu\text{mol}$ , 50 mol%) at 100 °C for 18 hours. After purification by preparative TLC chromatography (hexane/EtOAc = 4:1 v/v), compound **2s** (35.1 mg) was obtained in 67% yield as a colorless oil.

$^1\text{H}$  NMR (600 MHz, Acetonitrile-*d*<sub>3</sub>, 60 °C)  $\delta$  8.12 (s, 1H), 7.75–6.59 (m, 9H), 7.34 (d,  $J = 6.3$  Hz, 1H), 7.19 (s, 1H), 6.90 (d,  $J = 7.6$  Hz, 1H), 6.49 (s, 1H), 3.84 (s, 3H), 2.45–2.07 (m, 6H), 2.19 (s, 3H), 1.97 (s, 3H), 1.29 (s, 9H);  $^{13}\text{C}$  NMR (150 MHz, Acetonitrile-*d*<sub>3</sub>, 60 °C)  $\delta$  161.47, 155.09, 152.07, 147.02, 143.84, 141.42, 140.47, 139.07, 138.47, 133.56, 133.07, 131.02, 128.77, 128.66, 127.31, 120.41, 114.03, 113.77, 81.21, 68.08, 56.21, 28.66, 21.60, 17.87. HRMS (ESI-TOF)  $m/z$  calc'd for  $\text{C}_{34}\text{H}_{39}\text{N}_2\text{O}_3$   $[\text{M}+\text{H}]^+$ : 523.2955; found: 523.2956. SFC Chiralpak<sup>®</sup> AD-3 column (10% isopropanol, 1.5 mL/min)  $t_r$  = 8.61 min (major), 9.37 min (minor): 97:3 er.

The absolute stereochemistry was assigned by analogy to compound **2ah**.

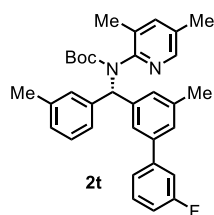

**tert-Butyl (S)-(3,5-dimethylpyridin-2-yl)((3'-fluoro-5-methyl-[1,1'-biphenyl]-3-yl)(*m*-tolyl)methyl)carbamate (2t)**

Substrate **1a** was arylated following the general procedure by using (*R*)-BNDHP (5.2 mg, 15  $\mu$ mol, 15 mol%), aryl iodide (70.2 mg, 0.3 mmol, 3.0 equiv.), and (+)-NBE-CO<sub>2</sub>Me (7.5 mg, 50  $\mu$ mol, 50 mol%) at 100 °C for 18 hours. After purification by preparative TLC chromatography (toluene/EtOAc = 20:1 v/v), compound **2t** (35.1 mg) was obtained in 67% yield as a colorless oil.

<sup>1</sup>H NMR (600 MHz, Acetonitrile-*d*<sub>3</sub>, 60 °C)  $\delta$  8.13 (s, 1H), 8.07–6.67 (m, 9H), 7.43 (d, *J* = 7.5 Hz, 1H), 7.19 (s, 1H), 7.07 (t, *J* = 7.8 Hz, 1H), 6.49 (s, 1H), 2.47–2.10 (m, 6H), 2.19 (s, 3H), 1.96 (s, 3H), 1.29 (s, 9H); <sup>13</sup>C NMR (150 MHz, Acetonitrile-*d*<sub>3</sub>, 60 °C)  $\delta$  164.40 (d, *J* = 244.4 Hz), 155.09, 152.00, 147.04, 144.82, 140.50, 140.21, 139.33, 138.49, 133.62, 133.11, 131.78, 131.72, 128.80, 127.34, 123.87, 119.02, 114.97 (d, *J* = 21.9 Hz), 114.60 (d, *J* = 21.8 Hz), 81.27, 68.01, 28.65, 21.60, 17.85. <sup>19</sup>F NMR (376 MHz, Acetonitrile-*d*<sub>3</sub>)  $\delta$  -114.97. HRMS (ESI-TOF) *m/z* calc'd for C<sub>33</sub>H<sub>36</sub>FN<sub>2</sub>O<sub>2</sub> [M+H]<sup>+</sup>: 511.2755; found: 511.2747.

SFC Chiralpak<sup>®</sup> IC column (20% isopropanol, 2.0 mL/min) *t*<sub>r</sub> = 3.33 min (minor), 4.13 min (major): 97:3 er.

The absolute stereochemistry was assigned by analogy to compound **2ah**.

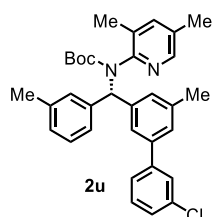

**tert-Butyl (S)-((3'-chloro-5-methyl-[1,1'-biphenyl]-3-yl)(*m*-tolyl)methyl)(3,5-dimethylpyridin-2-yl)carbamate (2u)**

Substrate **1a** was arylated following the general procedure by using (*R*)-BNDHP (5.2 mg, 15  $\mu$ mol, 15 mol%), aryl iodide (71.8 mg, 0.3 mmol, 3.0 equiv.), and (+)-NBE-CO<sub>2</sub>Me (7.5 mg, 50  $\mu$ mol, 50 mol%) at 100 °C for 18 hours. After purification by preparative TLC chromatography (toluene/EtOAc = 20:1 v/v), compound **2u** (33.8 mg) was obtained in 64% yield as a colorless oil.

<sup>1</sup>H NMR (600 MHz, Acetonitrile-*d*<sub>3</sub>, 60 °C)  $\delta$  8.13 (s, 1H), 7.80–6.66 (m, 9H), 7.40 (t, *J* = 7.4 Hz, 1H), 7.34 (d, *J* = 6.6 Hz, 1H), 7.19 (s, 1H), 6.49 (s, 1H), 2.49–2.11 (m, 6H), 2.20 (s, 3H), 1.96 (s, 3H), 1.29 (s, 9H); <sup>13</sup>C NMR (150 MHz, Acetonitrile-*d*<sub>3</sub>, 60 °C)  $\delta$  155.08, 151.99, 147.03, 144.38, 140.50, 140.05, 139.36, 138.49, 135.45, 133.63, 133.12, 131.56, 129.98, 128.76, 128.26, 127.93, 127.31, 126.43, 81.28, 67.99, 28.65, 21.58, 17.87, 17.83. HRMS (ESI-TOF) *m/z* calc'd for C<sub>33</sub>H<sub>36</sub>ClN<sub>2</sub>O<sub>2</sub> [M+H]<sup>+</sup>: 527.2460; found: 527.2462.

SFC Chiralpak<sup>®</sup> IC column (20% isopropanol, 2.0 mL/min) *t*<sub>r</sub> = 3.99 min (minor), 5.21 min (major): 95:5 er.

The absolute stereochemistry was assigned by analogy to compound **2ah**.

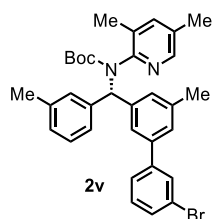

**tert-Butyl (S)-((3'-bromo-5-methyl-[1,1'-biphenyl]-3-yl)(*m*-tolyl)methyl)(3,5-dimethylpyridin-2-yl)carbamate (2v)**

Substrate **1a** was arylated following the general procedure by using (*R*)-BNDHP (5.2 mg, 15  $\mu$ mol, 15 mol%), aryl iodide (85.0 mg, 0.3 mmol, 3.0 equiv.), and (+)-NBE-CO<sub>2</sub>Me (7.5 mg, 50  $\mu$ mol, 50 mol%) at 100 °C for 18 hours. After purification by preparative TLC chromatography (toluene/EtOAc = 20:1 v/v), compound **2v** (41.8 mg) was obtained in 73% yield as a colorless oil.

<sup>1</sup>H NMR (600 MHz, Acetonitrile-*d*<sub>3</sub>, 60 °C)  $\delta$  8.13 (s, 1H), 8.05–6.64 (m, 9H), 7.49 (d, *J* = 7.9 Hz, 1H), 7.33 (t, *J* = 7.6 Hz, 1H), 7.19 (s, 1H), 6.49 (s, 1H), 2.46–2.10 (m, 6H), 2.20 (s, 3H), 1.96 (s, 3H), 1.29 (s, 9H); <sup>13</sup>C NMR (150 MHz, Acetonitrile-*d*<sub>3</sub>, 60 °C)  $\delta$  155.08, 151.99, 147.02, 144.64, 140.50, 139.96, 139.36, 138.49, 133.63, 133.12, 131.81, 131.24, 130.88, 128.80, 127.32, 126.85, 123.61, 81.28, 67.98, 28.66, 21.58, 17.89, 17.83. HRMS (ESI-TOF) *m/z* calc'd for C<sub>33</sub>H<sub>36</sub>BrN<sub>2</sub>O<sub>2</sub> [M+H]<sup>+</sup>: 571.1955; found: 571.1953.

SFC Chiralpak<sup>®</sup> IC column (20% isopropanol, 2.0 mL/min) *t*<sub>r</sub> = 4.42 min (minor), 5.76 min (major): 96:4 er.

The absolute stereochemistry was assigned by analogy to compound **2ah**.

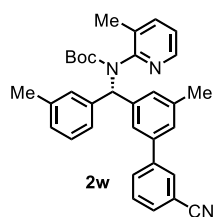

**tert-Butyl ((S)-((3'-cyano-5-methyl-[1,1'-biphenyl]-3-yl)(*m*-tolyl)methyl)(3-methylpyridin-2-yl)carbamate (2w)**

Substrate **1a'** was arylated following the general procedure by using (*R*)-BNDHP (5.2 mg, 15  $\mu$ mol, 15 mol%), aryl iodide (91.2 mg, 0.3 mmol, 3.0 equiv.), and (+)-NBE-CO<sub>2</sub>Me (7.5 mg, 50  $\mu$ mol, 50 mol%) at 100 °C for 12 hours. After purification by preparative TLC chromatography (hexane/EtOAc = 4:1 v/v), compound **2w** (34.6 mg) was obtained in 69% yield as a colorless oil.

<sup>1</sup>H NMR (600 MHz, Acetonitrile-*d*<sub>3</sub>, 60 °C)  $\delta$  8.29 (d, *J* = 3.3 Hz, 1H), 8.15–6.71 (m, 9H), 7.66 (d, *J* = 7.7 Hz, 1H), 7.57 (t, *J* = 7.8 Hz, 1H), 7.38 (d, *J* = 7.3 Hz, 1H), 7.05 (dd, *J* = 7.5, 4.7 Hz, 1H), 6.53 (s, 1H), 2.28 (br d, *J* = 53.6 Hz, 6H), 2.03 (s, 3H), 1.29 (s, 9H); <sup>13</sup>C NMR (150 MHz, Acetonitrile-*d*<sub>3</sub>, 60 °C)  $\delta$  154.92, 154.34, 146.86, 143.41, 140.02, 139.57, 139.40, 138.54, 133.94, 132.45, 131.91, 131.61, 131.02, 128.81, 127.37, 123.79, 119.80, 113.95, 81.43, 67.97, 28.63, 21.58, 18.00. HRMS (ESI-TOF) *m/z* calc'd for C<sub>33</sub>H<sub>34</sub>N<sub>3</sub>O<sub>2</sub> [M+H]<sup>+</sup>: 504.2646; found: 504.2658.

SFC Chiralpak<sup>®</sup> OJ-3 column (20% isopropanol, 2.0 mL/min) *t*<sub>r</sub> = 2.55 min (minor), 4.11 min (major): 90:10 er.

The absolute stereochemistry was assigned by analogy to compound **2ah**.

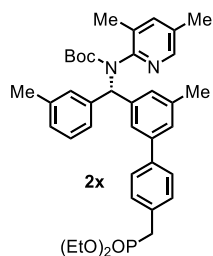

**tert-Butyl ((S)-((4'-((diethoxyphosphoryl)methyl)-5-methyl-[1,1'-biphenyl]-3-yl)(*m*-tolyl)methyl)(3,5-dimethylpyridin-2-yl)carbamate (2x)**

Substrate **1a** was arylated following the general procedure by using (*R*)-BNDHP (5.2 mg, 15  $\mu$ mol, 15 mol%), aryl iodide (106.2 mg, 0.3 mmol, 3.0 equiv.), and (+)-NBE-CO<sub>2</sub>Me (7.5 mg, 50  $\mu$ mol, 50 mol%) at 100 °C for 18 hours. After purification by preparative TLC chromatography (toluene/THF = 3:2 v/v), compound **2x** (44.2 mg) was obtained in 69% yield as a colorless oil.

<sup>1</sup>H NMR (600 MHz, Acetonitrile-*d*<sub>3</sub>, 60 °C)  $\delta$  8.12 (s, 1H), 7.76–6.68 (m, 11H), 7.19 (s, 1H), 6.48 (s, 1H), 4.02 (p, *J* = 7.3 Hz, 4H), 3.17 (d, *J* = 21.5 Hz, 2H), 2.41–2.14 (m, 6H), 2.19 (s, 3H), 1.97 (s, 3H), 1.29 (s, 9H),



1.24 (t,  $J = 7.1$  Hz, 6H);  $^{13}\text{C}$  NMR (150 MHz, Acetonitrile- $d_3$ , 60 °C)  $\delta$  155.11, 152.07, 147.04, 141.16, 140.71, 140.47, 139.12, 138.47, 133.56, 133.08, 132.90, 132.84, 131.50, 131.45, 128.79, 128.67, 127.90, 127.14, 81.24, 68.10, 63.03, 62.99, 34.31, 33.40, 28.66, 21.61, 17.86, 16.91, 16.87. HRMS (ESI-TOF)  $m/z$  calc'd for  $\text{C}_{38}\text{H}_{48}\text{N}_2\text{O}_3\text{P}$   $[\text{M}+\text{H}]^+$ : 634.3295; found: 634.3297.

SFC Chiralpak<sup>®</sup> AD-3 column (20% isopropanol, 2.0 mL/min)  $t_r = 3.66$  min (major), 4.71 min (minor): 95:5 er.

The absolute stereochemistry was assigned by analogy to compound **2ah**.

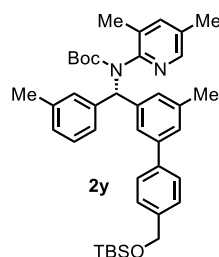

**tert-Butyl (S)-((4'-(((tert-butyl(dimethyl)silyloxy)methyl)-5-methyl-[1,1'-biphenyl]-3-yl)(m-tolyl)methyl)(3,5-dimethylpyridin-2-yl)carbamate (2y)**

Substrate **1a** was arylated following the general procedure by using (*R*)-BNDHP (5.2 mg, 15  $\mu\text{mol}$ , 15 mol%), aryl iodide (104 mg, 0.3 mmol, 3.0 equiv.), and (+)-NBE- $\text{CO}_2\text{Me}$  (7.5 mg, 50  $\mu\text{mol}$ , 50 mol%) at 100 °C for 18 hours. After purification by preparative TLC chromatography (toluene/EtOAc = 15:1 v/v), compound **2y** (36.2 mg) was obtained in 57% yield as a colorless oil.

$^1\text{H}$  NMR (600 MHz, Acetonitrile- $d_3$ , 60 °C)  $\delta$  8.12 (s, 1H), 7.72–6.78 (m, 11H), 7.19 (s, 1H), 6.48 (s, 1H), 4.77 (s, 2H), 2.44–2.14 (m, 6H), 2.19 (s, 3H), 1.96 (s, 3H), 1.29 (s, 9H), 0.97 (s, 9H), 0.13 (s, 6H);  $^{13}\text{C}$  NMR (150 MHz, Acetonitrile- $d_3$ , 60 °C)  $\delta$  155.09, 152.08, 147.03, 142.01, 141.38, 140.98, 140.46, 139.07, 138.46, 133.55, 133.07, 128.78, 128.64, 128.00, 127.81, 127.20, 81.22, 68.11, 65.76, 28.66, 26.55, 21.62, 19.20, 17.86, -4.81. HRMS (ESI-TOF)  $m/z$  calc'd for  $\text{C}_{40}\text{H}_{53}\text{N}_2\text{O}_3\text{Si}$   $[\text{M}+\text{H}]^+$ : 637.3820; found: 637.3820.

SFC Chiralpak<sup>®</sup> AD-3 column (10% isopropanol, 2.0 mL/min)  $t_r = 4.67$  min (major), 5.45 min (minor): 97:3 er.

The absolute stereochemistry was assigned by analogy to compound **2ah**.

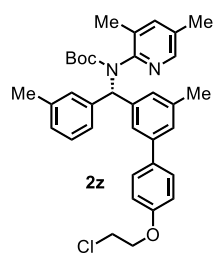

**tert-Butyl (S)-((4'-(2-chloroethoxy)-5-methyl-[1,1'-biphenyl]-3-yl)(m-tolyl)methyl)(3,5-dimethylpyridin-2-yl)carbamate (2z)**

Substrate **1a** was arylated following the general procedure by using (*R*)-BNDHP (5.2 mg, 15  $\mu\text{mol}$ , 15 mol%), aryl iodide (85 mg, 0.3 mmol, 3.0 equiv.), and (+)-NBE- $\text{CO}_2\text{Me}$  (7.5 mg, 50  $\mu\text{mol}$ , 50 mol%) at 100 °C for 18 hours. After purification by preparative TLC chromatography (hexane/EtOAc = 4:1 v/v), compound **2z** (38.7 mg) was obtained in 68% yield as a colorless oil.

$^1\text{H}$  NMR (600 MHz, Acetonitrile- $d_3$ , 60 °C)  $\delta$  8.12 (s, 1H), 7.99–6.65 (m, 11H), 7.19 (s, 1H), 6.48 (s, 1H), 4.29 (t,  $J = 5.5$  Hz, 2H), 3.87 (t,  $J = 5.4$  Hz, 2H), 2.44–2.08 (m, 6H), 2.19 (s, 3H), 1.96 (s, 3H), 1.29 (s, 9H);  $^{13}\text{C}$  NMR (150 MHz, Acetonitrile- $d_3$ , 60 °C)  $\delta$  159.24, 155.09, 152.07, 147.02, 141.01, 140.45, 139.02, 138.43, 135.41, 133.55, 133.07, 130.33, 129.13, 128.79, 128.64, 126.87, 116.44, 81.21, 69.70, 68.11, 43.82, 28.66, 21.62, 17.86. HRMS (ESI-TOF)  $m/z$  calc'd for  $\text{C}_{35}\text{H}_{40}\text{ClN}_2\text{O}_3$   $[\text{M}+\text{H}]^+$ : 571.2722; found: 571.2726.

SFC Chiralpak<sup>®</sup> IC column (30% isopropanol, 2.0 mL/min)  $t_r = 3.26$  min (minor), 3.92 min (major): 96:4 er.

The absolute stereochemistry was assigned by analogy to compound **2ah**.

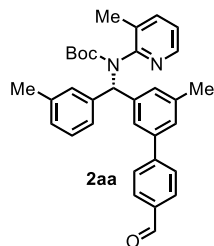

**tert-Butyl (S)-((4'-formyl-5-methyl-[1,1'-biphenyl]-3-yl)(*m*-tolyl)methyl)(3-methylpyridin-2-yl)carbamate (2aa)**

Substrate **1a'** was arylated following the general procedure by using (*R*)-BNDHP (5.2 mg, 15  $\mu$ mol, 15 mol%), aryl iodide (69.6 mg, 0.3 mmol, 3.0 equiv.), and (+)-NBE-CO<sub>2</sub>Me (7.5 mg, 50  $\mu$ mol, 50 mol%) at 100 °C for 12 hours. After purification by preparative TLC chromatography (hexane/EtOAc = 4:1 v/v), compound **2aa** (38.4 mg) was obtained in 76% yield as a colorless oil.

<sup>1</sup>H NMR (600 MHz, Acetonitrile-*d*<sub>3</sub>, 60 °C)  $\delta$  10.03 (s, 1H), 8.29 (d, *J* = 3.4 Hz, 1H), 7.93 (d, *J* = 7.8 Hz, 2H), 7.97–6.85 (m, 9H), 7.38 (d, *J* = 7.2 Hz, 1H), 7.04 (dd, *J* = 7.5, 4.7 Hz, 1H), 6.54 (s, 1H), 2.28 (br d, *J* = 57.8 Hz, 6H), 2.04 (s, 3H), 1.29 (s, 9H); <sup>13</sup>C NMR (150 MHz, Acetonitrile-*d*<sub>3</sub>, 60 °C)  $\delta$  193.13, 154.92, 154.36, 148.01, 146.88, 140.22, 140.01, 139.48, 138.54, 136.80, 133.89, 131.15, 128.81, 128.60, 127.58, 123.76, 81.43, 68.00, 28.63, 21.60, 18.01. HRMS (ESI-TOF) *m/z* calc'd for C<sub>33</sub>H<sub>35</sub>N<sub>2</sub>O<sub>3</sub> [M+H]<sup>+</sup>: 507.2642; found: 507.2637.

SFC Chiralpak<sup>®</sup> OJ-3 column (30% isopropanol, 2.5 mL/min) *t*<sub>r</sub> = 1.74 min (minor), 2.51 min (major): 96:4 er. The absolute stereochemistry was assigned by analogy to compound **2ah**.

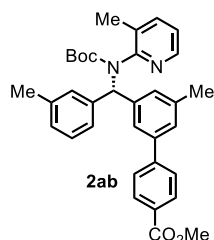

**Methyl (S)-3'-((((tert-butoxycarbonyl)(3-methylpyridin-2-yl)amino)(*m*-tolyl)methyl)-5'-methyl-[1,1'-biphenyl]-4-carboxylate (2ab)**

Substrate **1a'** was arylated following the general procedure by using (*R*)-BNDHP (5.2 mg, 15  $\mu$ mol, 15 mol%), aryl iodide (78 mg, 0.3 mmol, 3.0 equiv.), and (+)-NBE-CO<sub>2</sub>Me (7.5 mg, 50  $\mu$ mol, 50 mol%) at 100 °C for 12 hours. After purification by preparative TLC chromatography (hexane/EtOAc = 4:1 v/v), compound **2ab** (36.0 mg) was obtained in 67% yield as a colorless oil.

<sup>1</sup>H NMR (600 MHz, Acetonitrile-*d*<sub>3</sub>, 60 °C)  $\delta$  8.31 (d, *J* = 4.7 Hz, 1H), 8.07 (d, *J* = 8.0 Hz, 2H), 7.87–6.60 (m, 9H), 7.40 (d, *J* = 7.5 Hz, 1H), 7.07 (dd, *J* = 7.5, 4.7 Hz, 1H), 6.56 (s, 1H), 3.92 (s, 3H), 2.30 (br d, *J* = 53.0 Hz, 6H), 2.06 (s, 3H), 1.32 (s, 9H); <sup>13</sup>C NMR (150 MHz, Acetonitrile-*d*<sub>3</sub>, 60 °C)  $\delta$  167.75, 154.93, 154.38, 146.89, 146.66, 140.36, 140.01, 139.42, 138.54, 133.90, 131.01, 130.38, 128.78, 128.06, 127.47, 123.77, 81.42, 68.02, 52.76, 28.63, 21.60, 18.01. HRMS (ESI-TOF) *m/z* calc'd for C<sub>34</sub>H<sub>37</sub>N<sub>2</sub>O<sub>4</sub> [M+H]<sup>+</sup>: 537.2748; found: 537.2752. SFC Chiralpak<sup>®</sup> AD-3 column (15% isopropanol/hexane (v/v = 1/1), 2.0 mL/min) *t*<sub>r</sub> = 8.76 min (minor), 9.38 min (major): 97:3 er.

The absolute stereochemistry was assigned by analogy to compound **2ah**.

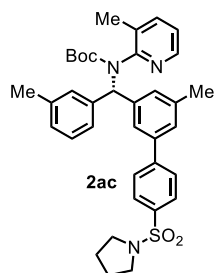

**tert-Butyl (S)-((5-methyl-4'-(pyrrolidin-1-ylsulfonyl)-[1,1'-biphenyl]-3-yl)(*m*-tolyl)methyl)(3-methylpyridin-2-yl)carbamate (2ac)**

Substrate **1a'** was arylated following the general procedure by using (*R*)-BNDHP (5.2 mg, 15  $\mu$ mol, 15 mol%), aryl iodide (101 mg, 0.3 mmol, 3.0 equiv.), and (+)-NBE-CO<sub>2</sub>Me (7.5 mg, 50  $\mu$ mol, 50 mol%) at 100 °C for 12 hours. After purification by preparative TLC chromatography (hexane/EtOAc = 2:1 v/v), compound **2ac** (44.6 mg) was obtained in 73% yield as a colorless oil.

<sup>1</sup>H NMR (600 MHz, Acetonitrile-*d*<sub>3</sub>, 60 °C)  $\delta$  8.29 (d, *J* = 4.7 Hz, 1H), 7.97–6.74 (m, 9H), 7.85 (d, *J* = 7.9 Hz, 2H), 7.38 (d, *J* = 7.6 Hz, 1H), 7.04 (dd, *J* = 7.5, 4.7 Hz, 1H), 6.54 (s, 1H), 3.28–3.14 (m, 4H), 2.28 (br d, *J* = 63.2 Hz, 6H), 2.03 (s, 3H), 1.82–1.65 (m, 4H), 1.29 (s, 9H); <sup>13</sup>C NMR (150 MHz, Acetonitrile-*d*<sub>3</sub>, 60 °C)  $\delta$  154.91, 154.34, 146.89, 146.42, 140.02, 139.82, 139.54, 138.54, 137.19, 133.91, 130.96, 129.17, 128.82, 128.55, 127.53, 123.78, 81.44, 67.97, 49.12, 28.63, 26.09, 21.61, 21.57, 18.01. HRMS (ESI-TOF) *m/z* calc'd for C<sub>36</sub>H<sub>42</sub>N<sub>3</sub>O<sub>4</sub>S [M+H]<sup>+</sup>: 612.2891; found: 612.2892.

SFC Chiralpak<sup>®</sup> OJ-3 column (10% isopropanol, 3 min, then 40% isopropanol, 2.5 mL/min) *t*<sub>r</sub> = 3.68 min (minor), 5.06 min (major): 92:8 er.

The absolute stereochemistry was assigned by analogy to compound **2ah**.

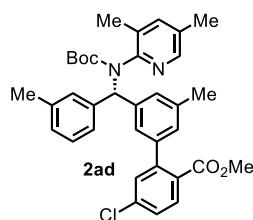

**Methyl (S)-3'-(((tert-butoxycarbonyl)(3,5-dimethylpyridin-2-yl)amino)(*m*-tolyl)methyl)-5-chloro-5'-methyl-[1,1'-biphenyl]-2-carboxylate (2ad)**

Substrate **1a** was arylated following the general procedure by using (PhO)<sub>2</sub>PO<sub>2</sub>H (3.8 mg, 15  $\mu$ mol, 15 mol%), aryl iodide (44.6 mg, 0.15 mmol, 1.5 equiv.), AgOAc (33 mg, 0.2 mmol, 2.0 equiv.), and (+)-NBE-CO<sub>2</sub>Me (3.0 mg, 20  $\mu$ mol, 20 mol%) at 80 °C for 12 hours. After purification by preparative TLC chromatography (hexane/EtOAc = 4:1 v/v), compound **2ad** (48.4 mg) was obtained in 83% yield as a colorless oil.

<sup>1</sup>H NMR (600 MHz, Acetonitrile-*d*<sub>3</sub>, 60 °C)  $\delta$  8.07 (s, 1H), 7.85–6.55 (m, 8H), 7.71 (s, 1H), 7.53 (d, *J* = 8.2 Hz, 1H), 7.19 (s, 1H), 6.45 (s, 1H), 3.56 (s, 3H), 2.53–2.09 (m, 6H), 2.19 (s, 3H), 1.95 (s, 3H), 1.27 (s, 9H); <sup>13</sup>C NMR (150 MHz, Acetonitrile-*d*<sub>3</sub>, 60 °C)  $\delta$  168.63, 155.01, 151.97, 146.97, 141.81, 140.47, 138.49, 138.45, 134.14, 133.86, 133.51, 133.28, 133.04, 128.72, 128.53, 126.98, 81.25, 68.04, 52.94, 28.65, 21.56, 17.86. HRMS (ESI-TOF) *m/z* calc'd for C<sub>35</sub>H<sub>38</sub>ClN<sub>2</sub>O<sub>4</sub> [M+H]<sup>+</sup>: 585.2515; found: 585.2516.

SFC Chiralpak<sup>®</sup> IC column (25% isopropanol, 2.0 mL/min) *t*<sub>r</sub> = 3.37 min (minor), 3.69 min (major): 98:2 er.

The absolute stereochemistry was assigned by analogy to compound **2ah**.

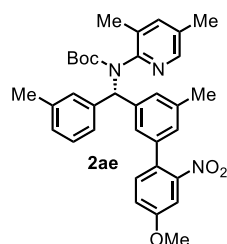

**tert-Butyl (S)-((3,5-dimethylpyridin-2-yl)((4'-methoxy-5-methyl-2'-nitro-[1,1'-biphenyl]-3-yl)(m-tolyl)methyl)carbamate (2ae)**

Substrate **1a** was arylated following the general procedure by using  $(\text{PhO})_2\text{PO}_2\text{H}$  (3.8 mg, 15  $\mu\text{mol}$ , 15 mol%), aryl iodide (44.6 mg, 0.15 mmol, 1.5 equiv.), AgOAc (33 mg, 0.2 mmol, 2.0 equiv.), and (+)-NBE- $\text{CO}_2\text{Me}$  (3.0 mg, 20  $\mu\text{mol}$ , 20 mol%) at 80 °C for 12 hours. After purification by preparative TLC chromatography (hexane/EtOAc = 2:1 v/v), compound **2ae** (48.4 mg) was obtained in 83% yield as a colorless oil.

$^1\text{H}$  NMR (600 MHz, Acetonitrile- $d_3$ , 60 °C)  $\delta$  8.11 (s, 1H), 7.90–6.54 (m, 10H), 7.41 (s, 1H), 6.46 (s, 1H), 3.92 (s, 3H), 2.51–2.14 (m, 6H), 2.23 (s, 3H), 1.98 (s, 3H), 1.30 (s, 9H);  $^{13}\text{C}$  NMR (150 MHz, Acetonitrile- $d_3$ , 60 °C)  $\delta$  160.57, 155.01, 151.91, 151.12, 147.00, 140.49, 138.94, 138.47, 138.06, 133.84, 133.52, 132.99, 129.92, 128.73, 128.21, 126.79, 119.63, 110.45, 81.29, 67.94, 57.07, 28.64, 21.56, 21.48, 17.87. HRMS (ESI-TOF)  $m/z$  calc'd for  $\text{C}_{34}\text{H}_{38}\text{N}_3\text{O}_5$   $[\text{M}+\text{H}]^+$ : 568.2806; found: 568.2805.

SFC Chiralpak<sup>®</sup> IC column (20% isopropanol, 2.0 mL/min)  $t_r$  = 4.84 min (minor), 5.48 min (major): 96:4 er.

The absolute stereochemistry was assigned by analogy to compound **2ah**.

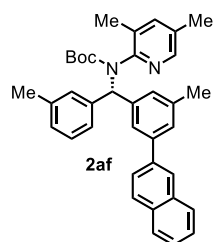

**tert-Butyl (S)-((3,5-dimethylpyridin-2-yl)((3-methyl-5-(naphthalen-2-yl)phenyl)(m-tolyl)methyl)carbamate (2af)**

Substrate **1a** was arylated following the general procedure by using (*R*)-BNDHP (5.2 mg, 15  $\mu\text{mol}$ , 15 mol%), aryl iodide (76.2 mg, 0.3 mmol, 3.0 equiv.), and (+)-NBE- $\text{CO}_2\text{Me}$  (7.5 mg, 50  $\mu\text{mol}$ , 50 mol%) at 100 °C for 18 hours. After purification by preparative TLC chromatography (hexane/THF = 6:1 v/v), compound **2af** (35.8 mg) was obtained in 66% yield as a colorless oil.

$^1\text{H}$  NMR (600 MHz, Acetonitrile- $d_3$ , 60 °C)  $\delta$  8.37–6.65 (m, 12H), 8.16 (s, 1H), 7.51 (p,  $J$  = 7.0 Hz, 2H), 7.20 (s, 1H), 6.53 (s, 1H), 2.52–2.10 (m, 6H), 2.19 (s, 3H), 1.98 (s, 3H), 1.30 (s, 9H);  $^{13}\text{C}$  NMR (150 MHz, Acetonitrile- $d_3$ , 60 °C)  $\delta$  155.12, 152.09, 147.06, 141.38, 140.49, 139.65, 139.23, 138.48, 134.96, 133.89, 133.58, 133.11, 129.55, 129.25, 128.81, 128.71, 127.56, 127.18, 126.51, 126.46, 81.25, 68.13, 28.68, 21.67, 21.61, 17.88. HRMS (ESI-TOF)  $m/z$  calc'd for  $\text{C}_{37}\text{H}_{39}\text{N}_2\text{O}_2$   $[\text{M}+\text{H}]^+$ : 543.3006; found: 543.3004.

SFC Chiralpak<sup>®</sup> AD-3 column (20% isopropanol, 2.0 mL/min)  $t_r$  = 4.56 min (major), 6.43 min (minor): 95:5 er.

The absolute stereochemistry was assigned by analogy to compound **2ah**.

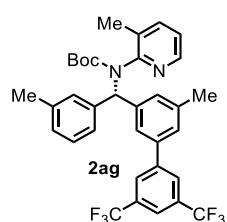

**tert-Butyl (S)-((5-methyl-3',5'-bis(trifluoromethyl)-[1,1'-biphenyl]-3-yl)(m-tolyl)methyl)(3-**

**methylpyridin-2-yl)carbamate (2ag)**

Substrate **1a'** was arylated following the general procedure by using (*R*)-BNDHP (5.2 mg, 15  $\mu$ mol, 15 mol%), aryl iodide (102 mg, 0.3 mmol, 3.0 equiv.), and (+)-NBE-CO<sub>2</sub>Me (7.5 mg, 50  $\mu$ mol, 50 mol%) at 100 °C for 12 hours. After purification by preparative TLC chromatography (hexane/toluene/EtOAc = 4:2:1 v/v/v), compound **2ag** (40.6 mg) was obtained in 66% yield as a white solid.

<sup>1</sup>H NMR (600 MHz, Acetonitrile-*d*<sub>3</sub>, 60 °C)  $\delta$  8.55–6.69 (m, 9H), 8.31–8.25 (m, 1H), 7.95 (s, 1H), 7.39 (d, *J* = 7.7 Hz, 1H), 7.06 (ddd, *J* = 7.4, 4.6, 2.5 Hz, 1H), 6.55 (s, 1H), 2.29 (d, *J* = 74.2 Hz, 3H), 2.03 (s, 3H), 1.29 (d, *J* = 2.5 Hz, 9H); <sup>13</sup>C NMR (150 MHz, Acetonitrile-*d*<sub>3</sub>, 60 °C)  $\delta$  154.95, 154.31, 146.83, 144.70, 140.08, 139.89, 138.58, 138.49, 134.06, 133.23, 132.90 (q, *J* = 33.1 Hz), 128.87, 128.43, 127.59, 126.42, 124.88 (q, *J* = 271.9 Hz), 122.98 (hept, *J* = 3.8 Hz), , 81.49, 67.88, 28.61, 21.54, 17.97; <sup>19</sup>F NMR (376 MHz, Acetonitrile-*d*<sub>3</sub>)  $\delta$  -63.57. HRMS (ESI-TOF) *m/z* calc'd for C<sub>34</sub>H<sub>33</sub>F<sub>6</sub>N<sub>2</sub>O<sub>2</sub> [M+H]<sup>+</sup>: 615.2441; found: 615.2445.

SFC Chiralpak<sup>®</sup> IC column (5% isopropanol, 1.0 mL/min) *t*<sub>r</sub> = 6.85 min (minor), 7.71 min (major): 99:1 er.

The absolute stereochemistry was assigned by analogy to compound **2ah**.

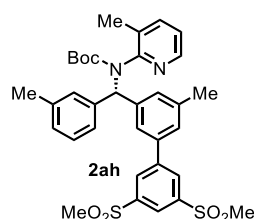

**tert-Butyl (S)-((5-methyl-3',5'-bis(methylsulfonyl)-[1,1'-biphenyl]-3-yl)(*m*-tolyl)methyl)(3-methylpyridin-2-yl)carbamate (2ah)**

Substrate **1a'** was arylated following the general procedure by using (*R*)-BNDHP (5.2 mg, 15  $\mu$ mol, 15 mol%), aryl iodide (108 mg, 0.3 mmol, 3.0 equiv.), and (+)-NBE-CO<sub>2</sub>Me (7.5 mg, 50  $\mu$ mol, 50 mol%) at 100 °C for 12 hours. After purification by preparative TLC chromatography (hexane/EtOAc = 1:1 v/v), compound **2ah** (51.0 mg) was obtained in 80% yield as a white solid.

<sup>1</sup>H NMR (600 MHz, Acetonitrile-*d*<sub>3</sub>, 60 °C)  $\delta$  8.71–6.72 (m, 9H), 8.37–8.32 (m, 2H), 7.39 (dd, *J* = 7.6, 1.8 Hz, 1H), 7.07 (dd, *J* = 7.6, 4.7 Hz, 1H), 6.57 (s, 1H), 3.18 (s, 6H), 2.30 (br d, *J* = 84.6 Hz, 6H), 2.04 (s, 3H), 1.30 (s, 9H); <sup>13</sup>C NMR (150 MHz, Acetonitrile-*d*<sub>3</sub>, 60 °C)  $\delta$  154.93, 154.19, 146.97, 145.28, 144.38, 140.08, 140.02, 138.58, 138.13, 134.02, 131.21, 128.87, 127.62, 125.70, 123.93, 81.52, 67.85, 44.78, 28.64, 21.55, 17.99. HRMS (ESI-TOF) *m/z* calc'd for C<sub>34</sub>H<sub>39</sub>N<sub>2</sub>O<sub>6</sub>S<sub>2</sub> [M+H]<sup>+</sup>: 635.2244; found: 635.2241.

SFC Chiralpak<sup>®</sup> OJ-3 column (15% isopropanol, 2.0 mL/min) *t*<sub>r</sub> = 4.87 min (minor), 5.65 min (major): 96:4 er. The absolute stereochemistry was determined by X-ray crystallography.

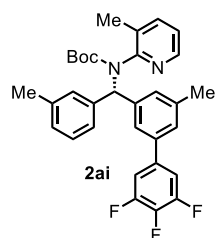

**tert-Butyl (S)-((3-methylpyridin-2-yl)(*m*-tolyl)(3',4',5'-trifluoro-5-methyl-[1,1'-biphenyl]-3-yl)methyl)carbamate (2ai)**

Substrate **1a'** was arylated following the general procedure by using (*R*)-BNDHP (5.2 mg, 15  $\mu$ mol, 15 mol%), aryl iodide (77.4 mg, 0.3 mmol, 3.0 equiv.), and (+)-NBE-CO<sub>2</sub>Me (7.5 mg, 50  $\mu$ mol, 50 mol%) at 100 °C for 12 hours. After purification by preparative TLC chromatography (toluene/EtOAc = 20:1 v/v), compound **2ai** (40.1 mg) was obtained in 75% yield as a white solid.

<sup>1</sup>H NMR (600 MHz, Acetonitrile-*d*<sub>3</sub>, 60 °C)  $\delta$  8.28 (d, *J* = 4.7 Hz, 1H), 8.13–6.62 (m, 9H), 7.38 (d, *J* = 7.5 Hz, 1H), 7.05 (dd, *J* = 7.5, 4.7 Hz, 1H), 6.52 (s, 1H), 2.27 (br d, *J* = 50.2 Hz, 6H), 2.03 (s, 3H), 1.29 (s, 9H); <sup>13</sup>C

NMR (150 MHz, Acetonitrile- $d_3$ , 60 °C)  $\delta$  154.92, 154.32, 152.49 (ddd,  $J = 247.1, 9.3, 3.4$  Hz), 146.87, 140.22 (dt,  $J = 249.0, 15.6$  Hz), 140.04, 139.64, 138.94, 138.57, 138.57, 138.45, 138.45, 133.96, 131.32, 128.85, 127.20, 126.13, 123.82, 112.14 (dd,  $J = 17.5, 3.8$  Hz), 81.46, 67.93, 28.63, 21.56, 17.99;  $^{19}\text{F}$  NMR (376 MHz, Acetonitrile- $d_3$ )  $\delta$  -136.70, -136.75, -165.47, -165.51. HRMS (ESI-TOF)  $m/z$  calc'd for  $\text{C}_{32}\text{H}_{32}\text{F}_3\text{N}_2\text{O}_2$   $[\text{M}+\text{H}]^+$ : 533.2410; found: 533.2407.

SFC Chiralpak<sup>®</sup> IC column (5% isopropanol, 1.0 mL/min)  $t_r = 20.03$  min (minor), 21.74 min (major): 96:4 er. The absolute stereochemistry was assigned by analogy to compound **2ah**.

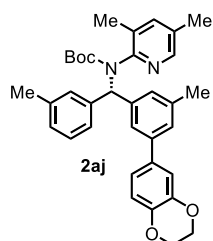

**tert-Butyl (S)-((3-(2,3-dihydrobenzo[b][1,4]dioxin-6-yl)-5-methylphenyl)(*m*-tolyl)methyl)(3,5-dimethylpyridin-2-yl)carbamate (2aj)**

Substrate **1a** was arylated following the general procedure by using (*R*)-BNDHP (5.2 mg, 15  $\mu\text{mol}$ , 15 mol%), aryl iodide (78.6 mg, 0.3 mmol, 3.0 equiv.), and (+)-NBE-CO<sub>2</sub>Me (7.5 mg, 50  $\mu\text{mol}$ , 50 mol%) at 100 °C for 18 hours. After purification by preparative TLC chromatography (hexane/EtOAc = 2:1 v/v), compound **2aj** (38.9 mg) was obtained in 71% yield as a colorless oil.

$^1\text{H}$  NMR (600 MHz, Acetonitrile- $d_3$ , 60 °C)  $\delta$  8.12 (s, 1H), 7.95–6.62 (m, 9H), 7.19–7.18 (m, 1H), 6.88 (d,  $J = 7.8$  Hz, 1H), 6.46 (s, 1H), 4.26 (s, 4H), 2.47–2.11 (m, 6H), 2.19 (s, 3H), 1.96 (s, 3H), 1.29 (s, 9H);  $^{13}\text{C}$  NMR (150 MHz, Acetonitrile- $d_3$ , 60 °C)  $\delta$  155.09, 152.06, 147.02, 145.21, 144.65, 140.96, 140.46, 138.99, 138.44, 135.67, 133.58, 133.09, 130.33, 128.78, 128.63, 126.88, 120.84, 118.57, 116.50, 81.20, 68.09, 65.67, 28.67, 21.61, 17.86. HRMS (ESI-TOF)  $m/z$  calc'd for  $\text{C}_{35}\text{H}_{39}\text{N}_2\text{O}_4$   $[\text{M}+\text{H}]^+$ : 551.2904; found: 551.2909.

SFC Chiralpak<sup>®</sup> AD-3 column (20% isopropanol, 1.0 mL/min)  $t_r = 7.61$  min (major), 8.67 min (minor): 97:3 er.

The absolute stereochemistry was assigned by analogy to compound **2ah**.

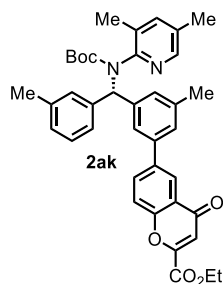

**tert-Butyl (S)-((3-(2,3-dihydrobenzo[b][1,4]dioxin-6-yl)-5-methylphenyl)(*m*-tolyl)methyl)(3,5-dimethylpyridin-2-yl)carbamate (2ak)**

Substrate **1a** was arylated following the general procedure by using (*R*)-BNDHP (5.2 mg, 15  $\mu\text{mol}$ , 15 mol%), aryl iodide (103 mg, 0.3 mmol, 3.0 equiv.), and (+)-NBE-CO<sub>2</sub>Me (7.5 mg, 50  $\mu\text{mol}$ , 50 mol%) at 100 °C for 18 hours. After purification by preparative TLC chromatography (hexane/EtOAc = 2:1 v/v), compound **2ak** (48.2 mg) was obtained in 76% yield as a colorless oil.

$^1\text{H}$  NMR (600 MHz, Acetonitrile- $d_3$ , 60 °C)  $\delta$  8.49–6.63 (m, 9H), 8.18 (s, 1H), 7.63 (d,  $J = 8.7$  Hz, 1H), 7.21–7.17 (m, 1H), 6.99 (s, 1H), 6.51 (s, 1H), 4.44 (q,  $J = 7.1$  Hz, 2H), 2.45–2.09 (m, 6H), 2.19 (s, 3H), 1.97 (s, 3H), 1.41 (t,  $J = 7.1$  Hz, 3H), 1.30 (s, 9H);  $^{13}\text{C}$  NMR (150 MHz, Acetonitrile- $d_3$ , 60 °C)  $\delta$  178.98, 161.62, 156.56, 155.08, 153.99, 151.95, 147.12, 140.51, 140.07, 139.52, 138.50, 134.56, 133.68, 133.10, 131.73, 130.04, 128.78, 127.35, 125.79, 123.80, 120.44, 115.20, 81.31, 67.98, 64.05, 28.66, 21.59, 17.86, 14.51. HRMS (ESI-TOF)  $m/z$  calc'd for  $\text{C}_{39}\text{H}_{41}\text{N}_2\text{O}_6$   $[\text{M}+\text{H}]^+$ : 633.2959; found: 633.2962.

SFC Chiralpak<sup>®</sup> OD-3 column (30% isopropanol, 2.0 mL/min)  $t_r$  = 4.79 min (minor), 5.35 min (major): 96:4 er.

The absolute stereochemistry was assigned by analogy to compound **2ah**.

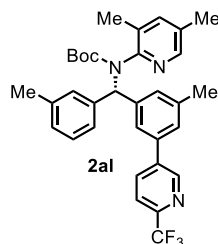

**tert-Butyl (S)-(3,5-dimethylpyridin-2-yl)((3-methyl-5-(6-(trifluoromethyl)pyridin-3-yl)phenyl)(m-tolyl)methyl)carbamate (2al)**

Substrate **1a** was arylated following the general procedure by using Pd(OAc)<sub>2</sub> (3.3 mg, 15 μmol, 15 mol%), ligand (6.9 mg, 23 μmol, 23 mol%), (*R*)-BNDHP (8.0 mg, 23 μmol, 23 mol%), aryl iodide (81.9 mg, 0.3 mmol, 3.0 equiv.), and (+)-NBE-CO<sub>2</sub>Me (7.5 mg, 50 μmol, 50 mol%) at 100 °C for 18 hours. After purification by preparative TLC chromatography (hexane/EtOAc = 4:1 v/v), compound **2al** (34.9 mg) was obtained in 62% yield as a colorless oil.

<sup>1</sup>H NMR (600 MHz, Acetonitrile-*d*<sub>3</sub>, 60 °C) δ 9.18–6.62 (m, 9H), 8.13 (s, 1H), 7.81 (d, *J* = 8.1 Hz, 1H), 7.19 (s, 1H), 6.52 (s, 1H), 2.53–2.10 (m, 6H), 2.19 (s, 3H), 1.97 (s, 3H), 1.29 (s, 9H); <sup>13</sup>C NMR (150 MHz, Acetonitrile-*d*<sub>3</sub>, 60 °C) δ 155.07, 151.92, 149.44, 147.28 (q, *J* = 34.3 Hz), 147.04, 140.78, 140.52, 139.82, 138.56, 136.91, 136.79, 133.66, 133.12, 131.46, 128.84, 127.62, 123.29 (d, *J* = 272.8 Hz), 121.79, 81.35, 67.95, 28.65, 21.57, 17.85; <sup>19</sup>F NMR (376 MHz, Acetonitrile-*d*<sub>3</sub>, 60 °C) δ -68.47. HRMS (ESI-TOF) *m/z* calc'd for C<sub>33</sub>H<sub>35</sub>F<sub>3</sub>N<sub>3</sub>O<sub>2</sub> [M+H]<sup>+</sup>: 562.2676; found: 562.2675.

SFC Chiralpak<sup>®</sup> AD-3 column (10% isopropanol, 2.0 mL/min)  $t_r$  = 4.10 min (minor), 5.02 min (major): 5:95 er.

The absolute stereochemistry was assigned by analogy to compound **2ah**.

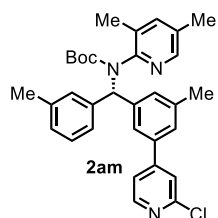

**tert-Butyl (S)-((3-(2-chloropyridin-4-yl)-5-methylphenyl)(m-tolyl)methyl)(3,5-dimethylpyridin-2-yl)carbamate (2am)**

Substrate **1a** was arylated following the general procedure by using Pd(OAc)<sub>2</sub> (3.3 mg, 15 μmol, 15 mol%), ligand (6.9 mg, 23 μmol, 23 mol%), (*R*)-BNDHP (8.0 mg, 23 μmol, 23 mol%), aryl iodide (71.7 mg, 0.3 mmol, 3.0 equiv.), and (+)-NBE-CO<sub>2</sub>Me (7.5 mg, 50 μmol, 50 mol%) at 100 °C for 18 hours. After purification by preparative TLC chromatography (hexane/EtOAc = 7:2 v/v), compound **2am** (34.9 mg) was obtained in 65% yield as a colorless oil.

<sup>1</sup>H NMR (600 MHz, Acetonitrile-*d*<sub>3</sub>, 60 °C) δ 8.37 (s, 1H), 8.28–6.72 (m, 9H), 8.13 (s, 1H), 7.19 (s, 1H), 6.51 (s, 1H), 2.49–2.10 (m, 6H), 2.19 (s, 3H), 1.95 (s, 3H), 1.29 (d, *J* = 1.1 Hz, 9H); <sup>13</sup>C NMR (150 MHz, Acetonitrile-*d*<sub>3</sub>, 60 °C) δ 155.04, 153.02, 152.80, 151.89, 151.32, 147.03, 140.53, 139.82, 138.55, 137.25, 133.69, 133.13, 131.74, 128.84, 127.33, 122.74, 121.67, 81.36, 67.87, 28.65, 21.56, 17.87, 17.82. HRMS (ESI-TOF) *m/z* calc'd for C<sub>32</sub>H<sub>35</sub>ClN<sub>3</sub>O<sub>2</sub> [M+H]<sup>+</sup>: 528.2412; found: 528.2411.

SFC Chiralpak<sup>®</sup> AD-3 column (20% isopropanol, 2.0 mL/min)  $t_r$  = 2.67 min (minor), 3.18 min (major): 89:11 er.

The absolute stereochemistry was assigned by analogy to compound **2ah**.

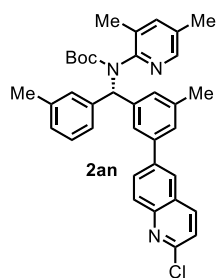

**tert-Butyl (S)-((3-(2-chloroquinolin-6-yl)-5-methylphenyl)(*m*-tolyl)methyl)(3,5-dimethylpyridin-2-yl)carbamate (2an)**

Substrate **1a** was arylated following the general procedure by using (*R*)-BNDHP (5.2 mg, 15  $\mu$ mol, 15 mol%), aryl iodide (87 mg, 0.3 mmol, 3.0 equiv.), and (+)-NBE-CO<sub>2</sub>Me (7.5 mg, 50  $\mu$ mol, 50 mol%) at 100 °C for 18 hours. After purification by preparative TLC chromatography (hexane/EtOAc = 4:1 v/v), compound **2an** (29.5 mg) was obtained in 51% yield as a colorless oil.

<sup>1</sup>H NMR (600 MHz, Acetonitrile-*d*<sub>3</sub>, 60 °C)  $\delta$  8.38–6.84 (m, 9H), 8.26 (d, *J* = 8.6 Hz, 1H), 8.15 (s, 1H), 7.98 (d, *J* = 8.1 Hz, 1H), 7.45 (d, *J* = 8.6 Hz, 1H), 7.20 (s, 1H), 6.53 (s, 1H), 2.51–2.13 (m, 6H), 2.19 (s, 3H), 1.98 (s, 3H), 1.30 (s, 9H); <sup>13</sup>C NMR (150 MHz, Acetonitrile-*d*<sub>3</sub>, 60 °C)  $\delta$  155.11, 152.02, 151.49, 148.36, 147.06, 140.88, 140.71, 140.51, 140.31, 139.45, 138.51, 133.62, 133.12, 131.12, 129.83, 128.81, 128.45, 127.66, 126.43, 123.85, 81.30, 68.07, 28.67, 21.63, 17.87. HRMS (ESI-TOF) *m/z* calc'd for C<sub>36</sub>H<sub>37</sub>ClN<sub>3</sub>O<sub>2</sub> [M+H]<sup>+</sup>: 578.2569; found: 578.2567.

SFC Chiralpak<sup>®</sup> IC column (30% isopropanol, 2.0 mL/min) *t*<sub>r</sub> = 7.76 min (minor), 8.79 min (major): 90:10 er. The absolute stereochemistry was assigned by analogy to compound **2ah**.

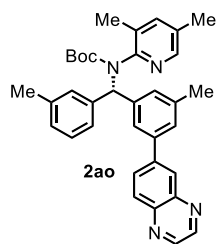

**tert-Butyl (S)-((3-methyl-5-(quinoxalin-6-yl)phenyl)(*m*-tolyl)methyl)(3,5-dimethylpyridin-2-yl)carbamate (2ao)**

Substrate **1a** was arylated following the general procedure by using Pd(OAc)<sub>2</sub> (3.3 mg, 15  $\mu$ mol, 15 mol%), Ligand (6.9 mg, 23  $\mu$ mol, 23 mol%), (*R*)-BNDHP (8.0 mg, 23  $\mu$ mol, 23 mol%), aryl iodide (76.8 mg, 0.3 mmol, 3.0 equiv.), and (+)-NBE-CO<sub>2</sub>Me (7.5 mg, 50  $\mu$ mol, 50 mol%) at 100 °C for 18 hours. After purification by preparative TLC chromatography (hexane/EtOAc = 1:1 v/v), compound **2ao** (25.5 mg) was obtained in 47% yield as a colorless oil.

<sup>1</sup>H NMR (600 MHz, Acetonitrile-*d*<sub>3</sub>, 60 °C)  $\delta$  8.86 (d, *J* = 1.8 Hz, 1H), 8.83 (d, *J* = 1.8 Hz, 1H), 8.50–6.68 (m, 11H), 7.22–7.18 (m, 1H), 6.54 (s, 1H), 2.54–2.11 (m, 6H), 2.20 (s, 3H), 1.98 (s, 3H), 1.30 (s, 9H); <sup>13</sup>C NMR (150 MHz, Acetonitrile-*d*<sub>3</sub>, 60 °C)  $\delta$  155.12, 152.02, 147.15, 147.08, 146.50, 144.41, 143.78, 143.52, 140.53, 140.06, 139.56, 138.54, 133.69, 133.15, 131.99, 130.99, 130.46, 128.83, 128.78, 127.81, 127.69, 81.31, 68.04, 28.66, 21.61, 17.87, 17.86. HRMS (ESI-TOF) *m/z* calc'd for C<sub>35</sub>H<sub>37</sub>N<sub>4</sub>O<sub>2</sub> [M+H]<sup>+</sup>: 545.2911; found: 545.2919. SFC Chiralpak<sup>®</sup> IC column (25% isopropanol, 2.0 mL/min) *t*<sub>r</sub> = 7.87 min (minor), 9.29 min (major): 84:16 er.

The absolute stereochemistry was assigned by analogy to compound **2ah**.



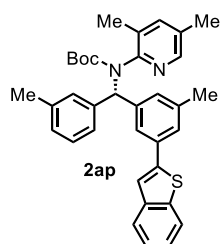

**tert-Butyl (S)-((3-(benzo[b]thiophen-2-yl)-5-methylphenyl)(*m*-tolyl)methyl)(3,5-dimethylpyridin-2-yl)carbamate (2ap)**

Substrate **1a** was arylated following the general procedure by using (*R*)-BNDHP (5.2 mg, 15  $\mu$ mol, 15 mol%), aryl iodide (78 mg, 0.3 mmol, 3.0 equiv.), and (+)-NBE-CO<sub>2</sub>Me (7.5 mg, 50  $\mu$ mol, 50 mol%) at 100 °C for 18 hours. After purification by preparative TLC chromatography (toluene/EtOAc = 10:1 v/v), compound **2ap** (33.4 mg) was obtained in 61% yield as a yellow solid.

<sup>1</sup>H NMR (600 MHz, Acetonitrile-*d*<sub>3</sub>, 60 °C)  $\delta$  8.35–6.64 (m, 8H), 8.15 (s, 1H), 7.87 (d, *J* = 7.9 Hz, 1H), 7.81 (d, *J* = 7.9 Hz, 1H), 7.37 (t, *J* = 7.5 Hz, 1H), 7.33 (t, *J* = 7.5 Hz, 1H), 7.20 (s, 1H), 6.49 (s, 1H), 2.45–2.13 (m, 6H), 2.19 (s, 3H), 1.99 (s, 3H), 1.30 (s, 9H); <sup>13</sup>C NMR (150 MHz, Acetonitrile-*d*<sub>3</sub>, 60 °C)  $\delta$  155.06, 151.98, 147.11, 145.43, 142.04, 140.51, 140.47, 139.54, 138.54, 134.72, 133.60, 133.02, 131.82, 130.50, 128.82, 126.51, 125.87, 125.69, 124.81, 123.39, 120.73, 81.35, 67.91, 28.66, 21.54, 17.87. HRMS (ESI-TOF) *m/z* calc'd for C<sub>35</sub>H<sub>37</sub>N<sub>2</sub>O<sub>2</sub>S [M+H]<sup>+</sup>: 549.2570; found: 549.2577.

SFC Chiralpak<sup>®</sup> AD-3 column (20% isopropanol, 2.0 mL/min) *t*<sub>r</sub> = 5.01 min (major), 6.48 min (major): 97:3 er.

The absolute stereochemistry was assigned by analogy to compound **2ah**.

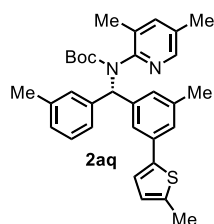

**tert-Butyl (S)-(3,5-dimethylpyridin-2-yl)((3-methyl-5-(5-methylthiophen-2-yl)phenyl)(*m*-tolyl)methyl)carbamate (2aq)**

Substrate **1a** was arylated following the general procedure by using (*R*)-BNDHP (5.2 mg, 15  $\mu$ mol, 15 mol%), aryl iodide (67.2 mg, 0.3 mmol, 3.0 equiv.), and (+)-NBE-CO<sub>2</sub>Me (7.5 mg, 50  $\mu$ mol, 50 mol%) at 100 °C for 18 hours. After purification by preparative TLC chromatography (hexane/EtOAc = 20:1 v/v), compound **2aq** (33.4 mg) was obtained in 65% yield as a yellow solid.

<sup>1</sup>H NMR (600 MHz, Acetonitrile-*d*<sub>3</sub>, 60 °C)  $\delta$  8.12 (d, *J* = 2.3 Hz, 1H), 8.03–6.57 (m, 8H), 7.19 (d, *J* = 2.3 Hz, 1H), 6.73 (s, 1H), 6.43 (s, 1H), 2.47 (s, 3H), 2.38–2.10 (m, 6H), 2.19 (s, 3H), 1.97 (s, 3H), 1.29 (s, 9H); <sup>13</sup>C NMR (150 MHz, Acetonitrile-*d*<sub>3</sub>, 60 °C)  $\delta$  155.05, 152.03, 147.06, 143.14, 140.72, 140.47, 139.25, 138.47, 135.21, 133.53, 132.99, 130.61, 128.72, 127.56, 125.51, 124.22, 81.26, 67.96, 28.66, 21.58, 21.52, 17.86, 15.51. HRMS (ESI-TOF) *m/z* calc'd for C<sub>32</sub>H<sub>37</sub>N<sub>2</sub>O<sub>2</sub>S [M+H]<sup>+</sup>: 513.2570; found: 513.2566.

SFC Chiralpak<sup>®</sup> IC column (20% isopropanol, 2.0 mL/min) *t*<sub>r</sub> = 4.61 min (minor), 5.44 min (major): 96:4 er.

The absolute stereochemistry was assigned by analogy to compound **2ah**.

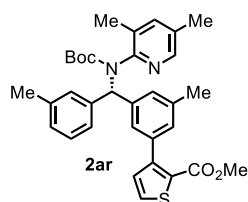

**Methyl (S)-3-(3-(((tert-butoxycarbonyl)(3,5-dimethylpyridin-2-yl)amino)(*m*-tolyl)methyl)-5-(5-methylthiophen-2-yl)phenyl)carbamate (2ar)**

**methylphenyl)thiophene-2-carboxylate (2ar)**

Substrate **1a** was arylated following the general procedure by using (*R*)-BNDHP (5.2 mg, 15  $\mu$ mol, 15 mol%), aryl iodide (80.4 mg, 0.3 mmol, 3.0 equiv.), and (+)-NBE-CO<sub>2</sub>Me (7.5 mg, 50  $\mu$ mol, 50 mol%) at 100 °C for 18 hours. After purification by preparative TLC chromatography (hexane/EtOAc = 4:1 v/v), compound **2ar** (36.8 mg) was obtained in 66% yield as a colorless oil.

<sup>1</sup>H NMR (600 MHz, Acetonitrile-*d*<sub>3</sub>, 60 °C)  $\delta$  8.07 (s, 1H), 7.85–6.52 (m, 8H), 7.61 (d, *J* = 5.4 Hz, 1H), 7.19 (s, 1H), 6.44 (s, 1H), 3.67 (s, 3H), 2.40–2.13 (m, 6H), 2.19 (s, 3H), 1.95 (s, 3H), 1.27 (s, 9H); <sup>13</sup>C NMR (150 MHz, Acetonitrile-*d*<sub>3</sub>, 60 °C)  $\delta$  163.45, 155.06, 152.04, 149.34, 146.97, 140.48, 138.46, 138.04, 136.48, 133.53, 133.08, 132.57, 131.72, 129.93, 129.51, 128.72, 128.23, 81.23, 68.08, 52.57, 28.64, 21.54, 17.86. HRMS (ESI-TOF) *m/z* calc'd for C<sub>33</sub>H<sub>37</sub>N<sub>2</sub>O<sub>4</sub>S [M+H]<sup>+</sup>: 557.2469; found: 557.2467.

SFC Chiralpak<sup>®</sup> IC column (20% isopropanol, 2.0 mL/min) *t*<sub>r</sub> = 6.26 min (minor), 7.39 min (major): 89:11 er. The absolute stereochemistry was assigned by analogy to compound **2ah**.

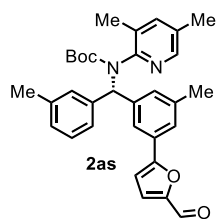**tert-Butyl (S)-((3-(5-formylfuran-2-yl)-5-methylphenyl)(*m*-tolyl)methyl)(3,5-dimethylpyridin-2-yl)carbamate (2as)**

Substrate **1a** was arylated following the general procedure by using (*R*)-BNDHP (5.2 mg, 15  $\mu$ mol, 15 mol%), aryl iodide (66.6 mg, 0.3 mmol, 3.0 equiv.), and (+)-NBE-CO<sub>2</sub>Me (7.5 mg, 50  $\mu$ mol, 50 mol%) at 100 °C for 18 hours. After purification by preparative TLC chromatography (hexane/EtOAc = 2:1 v/v), compound **2as** (20.4 mg) was obtained in 40% yield as a colorless oil.

<sup>1</sup>H NMR (600 MHz, Acetonitrile-*d*<sub>3</sub>, 60 °C)  $\delta$  9.59 (s, 1H), 8.11 (s, 1H), 7.81–6.67 (m, 8H), 7.38 (s, 1H), 7.19 (s, 1H), 6.48 (s, 1H), 2.41–2.12 (m, 6H), 2.19 (s, 3H), 1.97 (d, *J* = 3.7 Hz, 3H), 1.29 (s, 5H); <sup>13</sup>C NMR (150 MHz, Acetonitrile-*d*<sub>3</sub>, 60 °C)  $\delta$  178.42, 160.35, 155.04, 153.50, 151.92, 147.06, 140.52, 139.70, 138.58, 133.63, 133.01, 131.83, 129.91, 128.87, 125.37, 125.25, 123.64, 109.16, 81.43, 67.86, 28.64, 21.54, 17.85, 17.82. HRMS (ESI-TOF) *m/z* calc'd for C<sub>32</sub>H<sub>35</sub>N<sub>2</sub>O<sub>4</sub> [M+H]<sup>+</sup>: 511.2591; found: 511.2586.

SFC Chiralpak<sup>®</sup> OJ-3 column (20% isopropanol, 2.0 mL/min) *t*<sub>r</sub> = 2.56 min (minor), 2.99 min (major): 99.8:0.2 er.

The absolute stereochemistry was assigned by analogy to compound **2ah**.

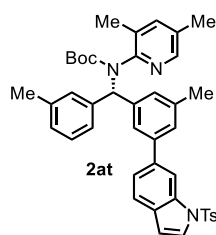**tert-Butyl (S)-((3-methyl-5-(1-tosyl-1H-indol-6-yl)phenyl)(*m*-tolyl)methyl)(3,5-dimethylpyridin-2-yl)carbamate (2at)**

Substrate **1a** was arylated following the general procedure by using (*R*)-BNDHP (5.2 mg, 15  $\mu$ mol, 15 mol%), aryl iodide (119 mg, 0.3 mmol, 3.0 equiv.), and (+)-NBE-CO<sub>2</sub>Me (7.5 mg, 50  $\mu$ mol, 50 mol%) at 100 °C for 18 hours. After purification by preparative TLC chromatography (hexane/EtOAc = 4:1 v/v), compound **2at** (58.1 mg) was obtained in 70% yield as a colorless oil.

<sup>1</sup>H NMR (600 MHz, Acetonitrile-*d*<sub>3</sub>, 60 °C)  $\delta$  8.39–6.80 (m, 9H), 8.17 (s, 1H), 7.78 (d, *J* = 8.0 Hz, 2H), 7.64 (d, *J* = 3.7 Hz, 1H), 7.58 (d, *J* = 8.0 Hz, 1H), 7.23 (d, *J* = 8.1 Hz, 2H), 7.20 (d, *J* = 2.3 Hz, 1H), 6.74 (d, *J* = 3.7 Hz, 1H), 6.54 (s, 1H), 2.45–2.11 (m, 6H), 2.30 (s, 3H), 2.17 (s, 3H), 2.01 (s, 3H), 1.31 (s, 9H); <sup>13</sup>C NMR

(150 MHz, Acetonitrile- $d_3$ , 60 °C)  $\delta$  155.10, 152.12, 147.17, 146.98, 141.59, 140.50, 139.21, 138.48, 136.61, 136.03, 133.51, 133.00, 131.40, 131.26, 128.78, 128.48, 127.95, 127.53, 124.06, 122.98, 112.67, 110.32, 81.30, 68.12, 28.70, 21.72, 21.65, 17.92, 17.89. HRMS (ESI-TOF)  $m/z$  calc'd for  $C_{42}H_{44}N_3O_4S$   $[M+H]^+$ : 686.3047; found: 686.3050.

SFC Chiralpak® OJ-3 column (15% isopropanol, 1.0 mL/min)  $t_r$  = 23.56 min (minor), 25.77 min (major): 92:8 er.

The absolute stereochemistry was assigned by analogy to compound **2ah**.

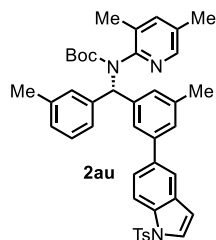

**tert-Butyl (S)-((3-methyl-5-(1-tosyl-1H-indol-6-yl)phenyl)(*m*-tolyl)methyl)(3,5-dimethylpyridin-2-yl)carbamate (2au)**

Substrate **1a** was arylated following the general procedure by using (*R*)-BNDHP (5.2 mg, 15  $\mu$ mol, 15 mol%), aryl iodide (119 mg, 0.3 mmol, 3.0 equiv.), and (+)-NBE-CO<sub>2</sub>Me (7.5 mg, 50  $\mu$ mol, 50 mol%) at 100 °C for 18 hours. After purification by preparative TLC chromatography (hexane/EtOAc = 4:1 v/v), compound **2au** (40.3 mg) was obtained in 59% yield as a colorless oil.

<sup>1</sup>H NMR (600 MHz, Acetonitrile- $d_3$ , 60 °C)  $\delta$  8.39–6.69 (m, 9H), 8.12 (s, 1H), 7.99 (d,  $J$  = 8.6 Hz, 1H), 7.80 (d,  $J$  = 8.0 Hz, 2H), 7.63 (d,  $J$  = 3.7 Hz, 1H), 7.29 (d,  $J$  = 8.1 Hz, 2H), 7.17 (s, 1H), 6.76 (d,  $J$  = 3.7 Hz, 1H), 6.48 (s, 1H), 2.52–2.09 (m, 6H), 2.31 (s, 3H), 2.17 (s, 3H), 1.96 (s, 3H), 1.28 (s, 9H); <sup>13</sup>C NMR (150 MHz, Acetonitrile- $d_3$ , 60 °C)  $\delta$  155.09, 152.05, 147.03, 141.50, 140.46, 139.10, 138.44, 138.06, 136.17, 135.38, 133.54, 133.07, 132.76, 131.23, 128.76, 128.60, 127.91, 127.51, 125.07, 120.80, 114.88, 110.72, 81.23, 68.08, 28.66, 21.71, 21.61, 17.86. HRMS (ESI-TOF)  $m/z$  calc'd for  $C_{42}H_{44}N_3O_4S$   $[M+H]^+$ : 686.3047; found: 686.3048.

SFC Chiralpak® AD-3 column (30% isopropanol, 3.0 mL/min)  $t_r$  = 2.70 min (major), 3.32 min (minor): 94:6 er.

The absolute stereochemistry was assigned by analogy to compound **2ah**.

#### D. Directing Group Cleavage of Desymmetrization Product **2ae**

The directing group was removed following a modified known procedure<sup>38</sup>.

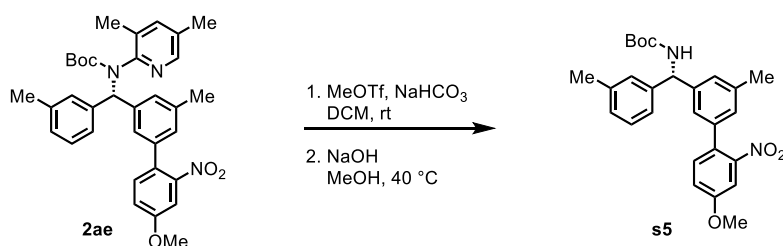

**tert-Butyl (S)-((4'-methoxy-5-methyl-2'-nitro-[1,1'-biphenyl]-3-yl)(*m*-tolyl)methyl)carbamate (s5)**

To a solution of compound **2ae** (28.4 mg, 50  $\mu$ mol, 1 equiv.) in dry DCM (0.5 mL), NaHCO<sub>3</sub> (6.3 mg, 75  $\mu$ mol, 1.5 equiv.) and MeOTf (7.9  $\mu$ L, 70  $\mu$ mol, 1.4 equiv.) were added at 0 °C. The reaction mixture was stirred at room temperature for 5 hours, and then filtered through cotton. The filtrate was evaporated under reduced pressure. The residue was dissolved in MeOH (0.5 mL). Aqueous NaOH solution (6 N, 0.25 mL) was added. The reaction mixture was stirred at 40 °C for 3 hours. Aqueous NH<sub>4</sub>Cl solution was added and extracted with EtOAc. The combined organic layers were dried with Na<sub>2</sub>SO<sub>4</sub>. After the organic solvent was

concentrated by rotary evaporation, the residue was purified by preparative TLC chromatography (hexane/EtOAc = 4:1 v/v) to afford 20.9 mg compound **s5** as a colorless oil (90 % yield).

$^1\text{H}$  NMR (600 MHz, Chloroform-*d*)  $\delta$  7.33 (d,  $J$  = 2.7 Hz, 1H), 7.29 (d,  $J$  = 8.5 Hz, 1H), 7.22 (t,  $J$  = 7.7 Hz, 1H), 7.11 (dd,  $J$  = 8.5, 2.6 Hz, 1H), 7.08–7.01 (m, 4H), 6.97 (d,  $J$  = 14.0 Hz, 2H), 5.85 (s, 1H), 5.13 (s, 1H), 3.88 (s, 3H), 2.33 (d,  $J$  = 2.8 Hz, 6H), 1.44 (s, 9H);  $^{13}\text{C}$  NMR (150 MHz, Chloroform-*d*)  $\delta$  159.18, 155.19, 149.80, 142.65, 141.88, 138.77, 138.51, 137.55, 132.89, 128.77, 128.68, 128.32, 128.26, 127.85, 124.49, 124.09, 118.71, 109.10, 79.94, 58.41, 56.06, 28.52, 21.60, 21.59. HRMS (ESI-TOF)  $m/z$  calc'd for  $\text{C}_{27}\text{H}_{30}\text{NaN}_2\text{O}_5$   $[\text{M}+\text{Na}]^+$ : 485.2047; found: 485.2044.

SFC Chiralpak<sup>®</sup> AD-3 column (15% isopropanol, 1.5 mL/min)  $t_r$  = 9.12 min (minor), 9.74 min (major): 94:6 er.

## E. Mechanistic Studies

### 1. Preparation of substrates

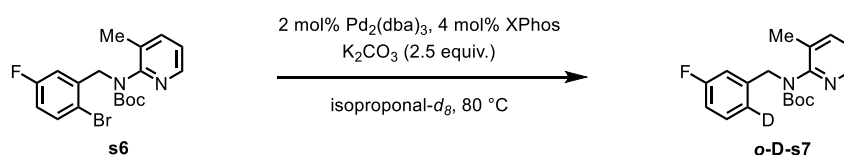

Benzylamine (**s6**) was synthesized following the literature procedures<sup>28</sup>.

#### *tert*-Butyl 3-fluoro-6-D-benzyl(3-methylpyridin-2-yl)carbamate (*o*-D-s7)

Aryl bromide **s6** (1.90 g, 4.8 mmol, 1.0 equiv),  $\text{Pd}_2(\text{dba})_3$  (88 mg, 96  $\mu\text{mol}$ , 2 mol%), XPhos (92 mg, 0.19 mmol, 10 mol%), and  $\text{K}_2\text{CO}_3$  (1.66 g, 12 mmol, 2.5 equiv.) were added into a flame-dried Schlenk tube. The Schlenk tube was evacuated and back-filled with nitrogen. Isopropanol-*d*<sub>8</sub> (5 mL) was added to the mixture. The Schlenk tube was immersed into a pre-heated oil bath at 80 °C. After 12 hours, the reaction mixture was filtered through Celite and eluted with EtOAc. After the organic solvent was concentrated by rotary evaporation, the residue was purified by silica gel chromatography (hexanes/EtOAc = 8:1 v/v) to afford 0.456 g compound ***o*-D-s7** as a white solid (30% yield).

$^1\text{H}$  NMR (600 MHz, Chloroform-*d*)  $\delta$  8.34 (d,  $J$  = 5.7 Hz, 1H), 7.46 (d,  $J$  = 8.0 Hz, 1H), 7.19 (t,  $J$  = 7.4 Hz, 1H), 7.09 (t,  $J$  = 6.9 Hz, 1H), 6.99 (d,  $J$  = 10.4 Hz, 1H), 6.90 (t,  $J$  = 8.5 Hz, 1H), 5.31–4.52 (m, 2H), 2.00 (s, 3H), 1.41 (d,  $J$  = 15.4 Hz, 9H);  $^{13}\text{C}$  NMR (150 MHz, Chloroform-*d*)  $\delta$  162.81 (d,  $J$  = 245.9 Hz), 153.91, 153.57, 146.53, 140.87, 139.44, 131.50, 129.68 (d,  $J$  = 8.3 Hz), 123.87, 122.41, 115.46, 114.18 (d,  $J$  = 20.9 Hz), 81.03, 51.84, 28.37, 17.62;  $^{19}\text{F}$  NMR (376 MHz, Chloroform-*d*)  $\delta$  -113.72. HRMS (ESI-TOF)  $m/z$  calc'd for  $\text{C}_{18}\text{H}_{21}\text{DFN}_2\text{O}_2$   $[\text{M}+\text{H}]^+$ : 318.1723; found: 318.1731.

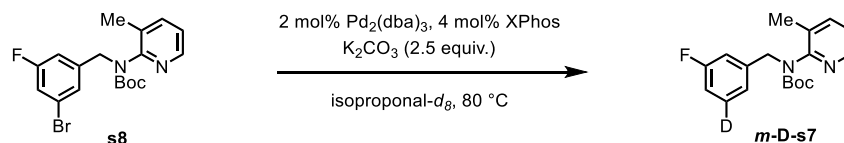

Benzylamine (**s8**) was synthesized following the literature procedures<sup>28</sup>.

#### *tert*-Butyl 3-fluoro-5-D-benzyl(3-methylpyridin-2-yl)carbamate (*m*-D-s7)

Aryl bromide **s8** (1.19 g, 3.0 mmol, 1.0 equiv),  $\text{Pd}_2(\text{dba})_3$  (55 mg, 60  $\mu\text{mol}$ , 2 mol%), XPhos (57 mg, 0.12 mmol, 10 mol%), and  $\text{K}_2\text{CO}_3$  (1.04 g, 7.5 mmol, 2.5 equiv.) were added into a flame-dried Schlenk tube. The Schlenk tube was evacuated and back-filled with nitrogen. Isopropanol-*d*<sub>8</sub> (5 mL) was added to the mixture. The Schlenk tube was immersed into a pre-heated oil bath at 80 °C. After 12 hours, the reaction mixture was filtered through Celite and eluted with EtOAc. After the organic solvent was concentrated by rotary evaporation, the residue was purified by silica gel chromatography (hexanes/EtOAc = 8:1 v/v) to afford 0.59 g compound ***m*-D-s7** as a white solid (62% yield).

$^1\text{H}$  NMR (600 MHz, Chloroform-*d*)  $\delta$  8.34 (dd,  $J = 4.8, 2.1$  Hz, 1H), 7.47 (d,  $J = 7.7$  Hz, 1H), 7.09 (dd,  $J = 7.6, 4.8$  Hz, 1H), 7.05–6.94 (m, 2H), 6.90 (dd,  $J = 8.7, 2.6$  Hz, 1H), 5.26–4.48 (m, 2H), 2.00 (s, 3H), 1.40 (s, 9H);  $^{13}\text{C}$  NMR (150 MHz, Chloroform-*d*)  $\delta$  162.83 (d,  $J = 245.4$  Hz), 153.94, 153.58, 146.54, 141.05, 139.45, 131.52, 129.53 (td,  $J = 24.8, 9.1$  Hz), 124.10, 122.42, 115.51, 114.10 (d,  $J = 20.9$  Hz), 81.04, 51.87, 28.38, 17.64;  $^{19}\text{F}$  NMR (376 MHz, Chloroform-*d*)  $\delta$  -113.72. HRMS (ESI-TOF)  $m/z$  calc'd for  $\text{C}_{18}\text{H}_{21}\text{DFN}_2\text{O}_2$   $[\text{M}+\text{H}]^+$ : 318.1723; found: 318.1733.

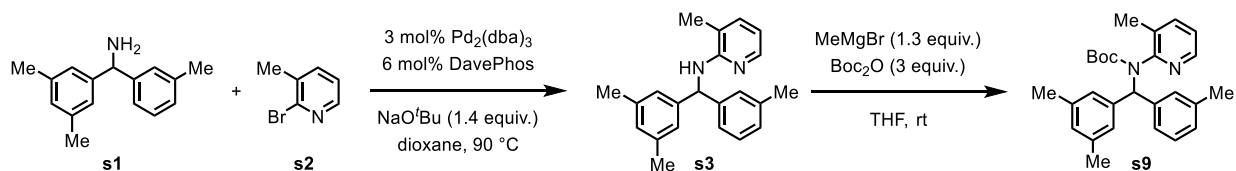

Diarylmethyl amines (**s1**) was synthesized following the literature procedures<sup>37</sup>.

### **tert-Butyl ((3,5-dimethylphenyl)(*m*-tolyl)methyl)(3-methylpyridin-2-yl)carbamate (**s9**)**

Amine **s1** (0.675 g, 3.0 mmol, 1 equiv.),  $\text{Pd}_2(\text{dba})_3$  (83 mg, 90  $\mu\text{mol}$ , 3 mol%), DavePhos (72 mg, 0.18 mmol, 6 mol%) and  $\text{NaO}^t\text{Bu}$  (0.4 g, 4.2 mmol, 1.4 equiv.) were added to a flame-dried Schlenk tube. The Schlenk tube was evacuated and back-filled with nitrogen. 2-Bromopyridines **s2** (0.52 g, 3 mmol, 1 equiv.) and 1,4-dioxane (9 mL) were added to the mixture. The Schlenk tube was immersed into a pre-heated oil bath at 90 °C. After 2 h, the oil bath was removed, and the Schlenk tube was allowed to cool to room temperature. Water was added into the reaction mixture, which was then extracted with EtOAc. The combined organic layers were dried with  $\text{Na}_2\text{SO}_4$ . After the organic solvent was concentrated by rotatory evaporation, the residue was purified by silica gel chromatography (hexanes/EtOAc = 20:1 v/v) to afford compound **s3**.

To a solution of compound **s3** in dry THF (30 mL) was added MeMgBr (3.0 M, 1.3 mL, 3.9 mmol, 1.3 equiv.) at 0 °C, and the resulting mixture was allowed to warm up to room temperature and stirred for 30 min. Then  $\text{Boc}_2\text{O}$  (1.96 g, 9 mmol, 3 equiv.) was added into the mixture. The resulting mixture was allowed to warm up to room temperature and stirred for another 12 hours. Water was added into the reaction mixture, which was then extracted with EtOAc. The combined organic layers were dried with  $\text{Na}_2\text{SO}_4$ . After the organic solvent was concentrated by rotatory evaporation, the residue was purified by silica gel chromatography (hexanes/EtOAc = 20:1 v/v) to afford 0.456 g compound **s9** as a white solid (45% yield).

$^1\text{H}$  NMR (600 MHz, Acetonitrile-*d*<sub>3</sub>, 60 °C)  $\delta$  8.25 (dd,  $J = 4.8, 2.2$  Hz, 1H), 7.69–6.55 (m, 7H), 7.36 (dd,  $J = 7.6, 2.2$  Hz, 1H), 7.03 (dd,  $J = 7.4, 4.8$  Hz, 1H), 6.38 (s, 1H), 2.39–2.02 (m, 9H), 2.00 (s, 3H), 1.26 (s, 9H);  $^{13}\text{C}$  NMR (150 MHz, Acetonitrile-*d*<sub>3</sub>, 60 °C)  $\delta$  154.61, 154.04, 146.56, 143.55, 140.18, 139.73, 138.31, 137.95, 133.57, 131.73, 129.66, 129.33, 128.98, 128.58, 128.26, 126.80, 126.11, 123.53, 81.00, 67.69, 28.33, 21.50, 21.25, 17.82. HRMS (ESI-TOF)  $m/z$  calc'd for  $\text{C}_{27}\text{H}_{33}\text{N}_2\text{O}_2$   $[\text{M}+\text{H}]^+$ : 417.2537; found: 417.2545.

## 2. Measurement of the kinetic isotope effect

Kinetic studies on the *meta*-arylation of **s7**, ***o*-D-s7**, and ***m*-D-s7** were conducted in separate vessels.

Arene (0.05 mmol, 1.0 equiv),  $\text{Pd}(\text{OAc})_2$  (1.1 mg, 5  $\mu\text{mol}$ , 10 mol%), 3,5-diCF<sub>3</sub>-pyridone (1.7 mg, 7.5  $\mu\text{mol}$ , 15 mol%), 4-iodobenzotrifluoride (14.7  $\mu\text{L}$ , 0.1 mmol, 2.0 equiv.), and AgOAc (25 mg, 0.15 mmol, 3.0 equiv.) were added into a 2-dram reaction vial.  $\text{CHCl}_3$  (0.5 mL) and NBE-CO<sub>2</sub>Me (11.4 mg, 75  $\mu\text{mol}$ , 1.5 equiv.) were added to the mixture. The reaction mixture was then stirred at 100 °C for given times. After cooling to room temperature, the mixture was filtered through Celite and eluted with EtOAc (3  $\times$  2 mL). The filtrate was evaporated under reduced pressure. The yield was determined by  $^{19}\text{F}$  NMR analysis of the crude mixture using 1,2-difluorobenzene as an internal standard. All measurements were repeated once.

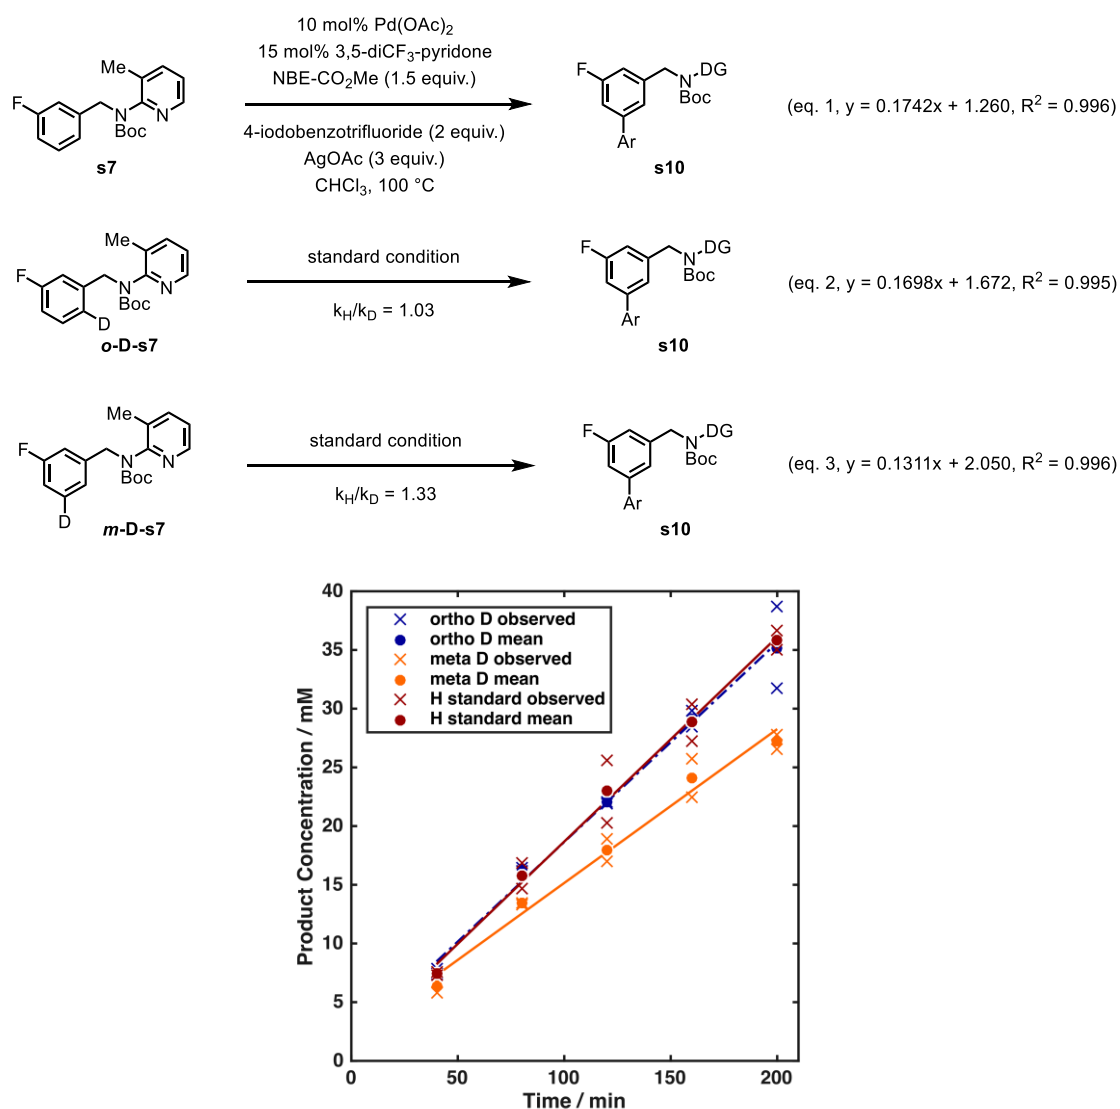

**Fig. S1.** Determination of the kinetic isotope effect.

### 3. Measurement of reaction rate dependence

Arene, Pd(OAc)<sub>2</sub>, ligand (1.5 equiv. to Pd(OAc)<sub>2</sub>), 4-iodobenzotrifluoride, and AgOAc were added into a 2-dram reaction vial. CHCl<sub>3</sub> and NBE-CO<sub>2</sub>Me were added to the mixture. The reaction mixture was then stirred at 100 °C for given times. After cooling to room temperature, the mixture was filtered through Celite and eluted with EtOAc. The filtrate was evaporated under reduced pressure. The yield was determined by <sup>19</sup>F NMR analysis of the crude mixture using 1,2-difluorobenzene as an internal standard. All measurements were repeated once.

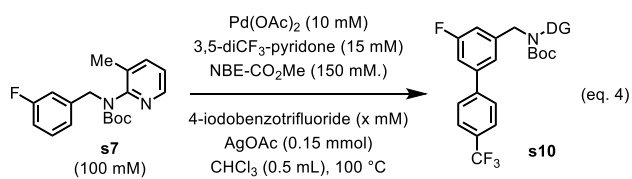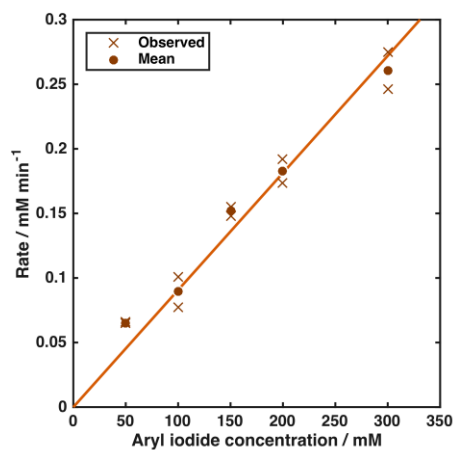

**Fig. S2.** Reaction rate dependence of arene **s7** on aryl iodide using super-stoichiometric NBE-CO<sub>2</sub>Me.

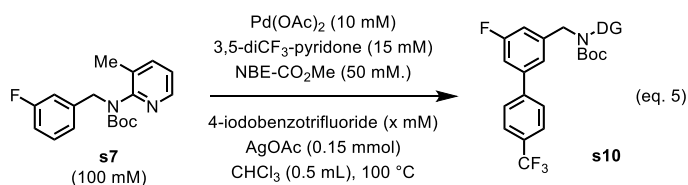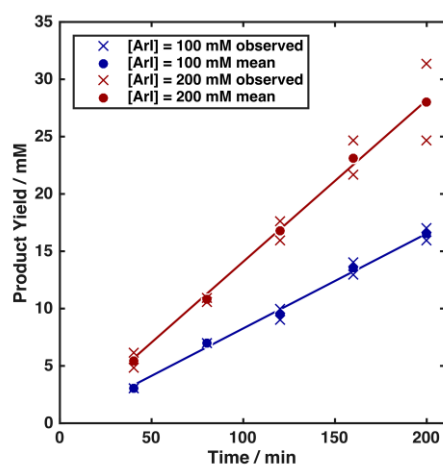

**Fig. S3.** Reaction rate dependence of arene **s7** on aryl iodide using catalytic NBE-CO<sub>2</sub>Me.

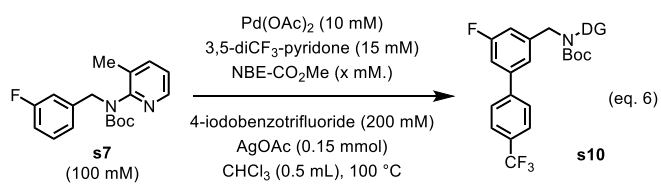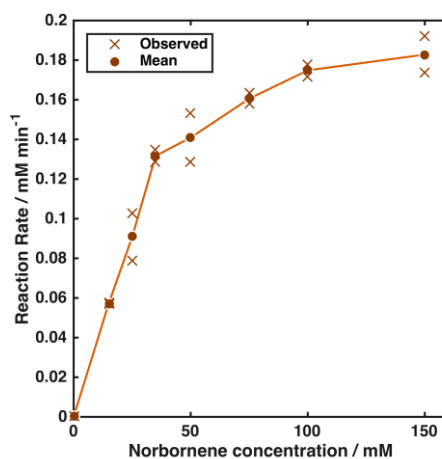

**Fig. S4.** Reaction rate dependence of arene **s7** on NBE-CO<sub>2</sub>Me.

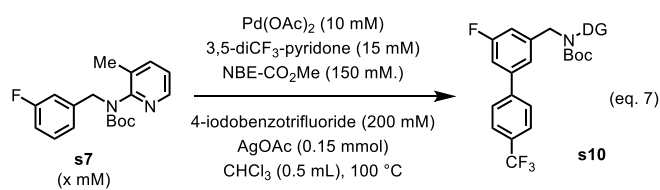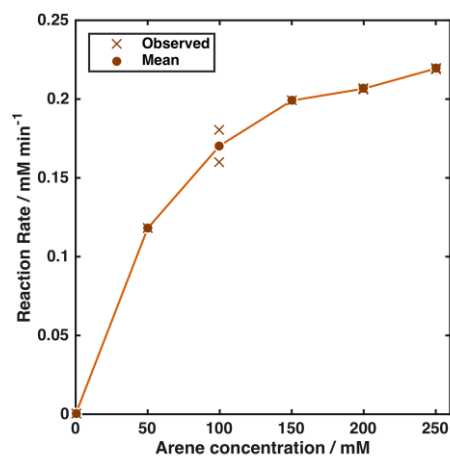

Fig. S5. Reaction rate dependence on arene **s7**.

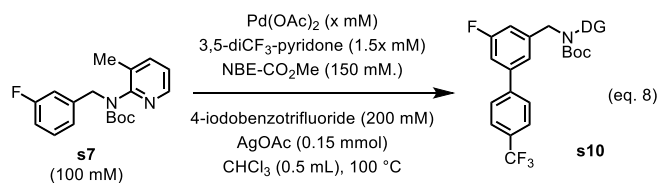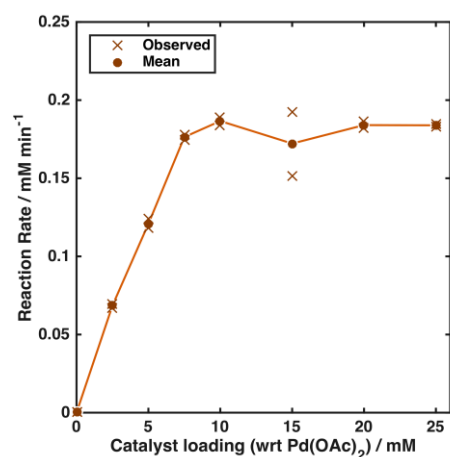

Fig. S6. Reaction rate dependence of arene **s7** on catalyst.

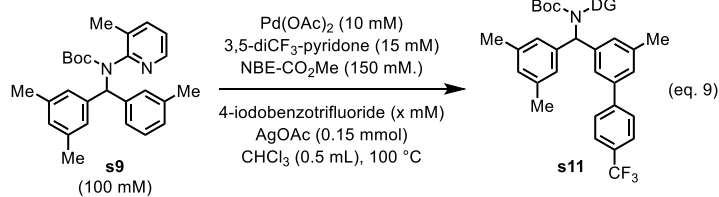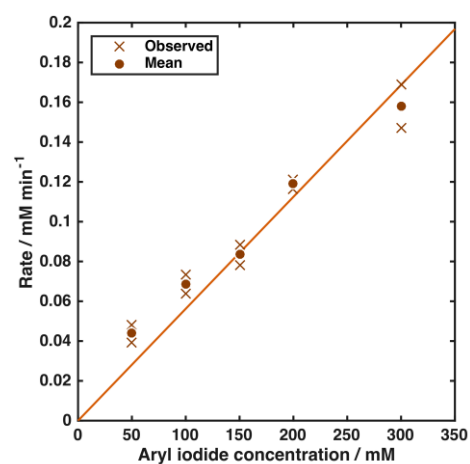

Fig. S7. Reaction rate dependence of arene **s9** on aryl iodide using super-stoichiometric NBE-CO<sub>2</sub>Me.



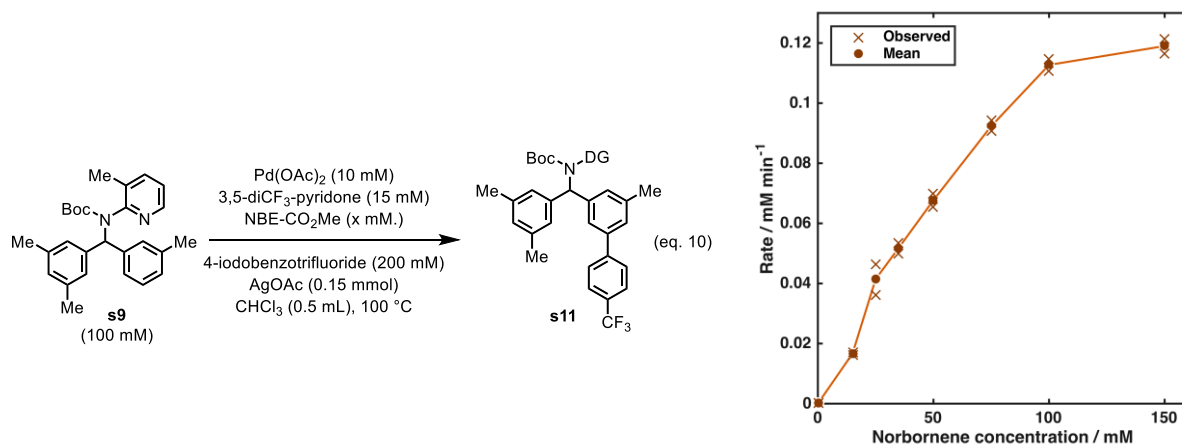

**Fig. S8.** Reaction rate dependence of arene **s9** on NBE-CO<sub>2</sub>Me.

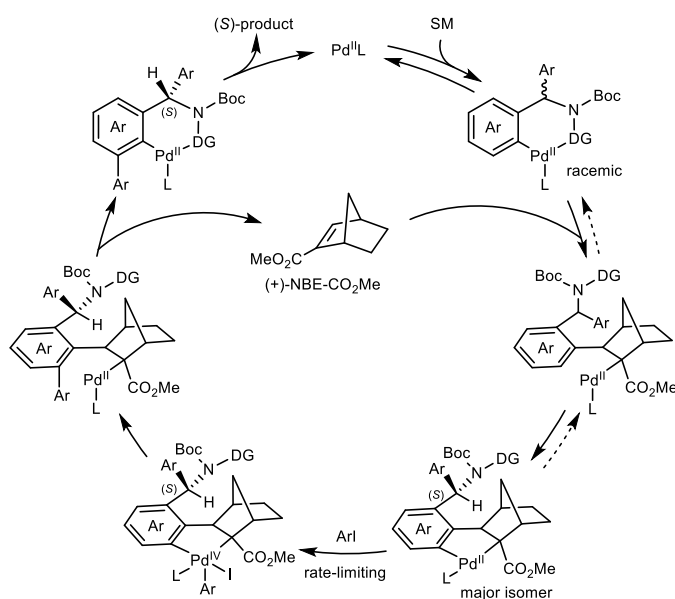

**Fig. S9.** Proposed catalytic cycle

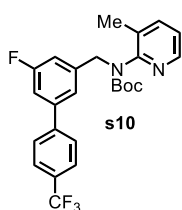

**tert-Butyl (3,5-dimethylpyridin-2-yl)((5-fluoro-4'-(trifluoromethyl)-[1,1'-biphenyl]-3-yl)methyl)carbamate (**s10**)**

Preparative TLC chromatography eluent: hexane/EtOAc = 10:1 v/v.

<sup>1</sup>H NMR (600 MHz, Chloroform-*d*) δ 8.36 (d, *J* = 5.1 Hz, 1H), 7.67 (d, *J* = 8.1 Hz, 2H), 7.59 (d, *J* = 8.1 Hz, 2H), 7.50 (d, *J* = 7.7 Hz, 1H), 7.30 (s, 1H), 7.15 (d, *J* = 9.5 Hz, 1H), 7.14–7.05 (m, 2H), 4.99 (br d, *J* = 106.1 Hz, 2H), 2.07 (s, 3H), 1.41 (s, 9H); <sup>13</sup>C NMR (150 MHz, Chloroform-*d*) δ 163.21 (d, *J* = 246.5 Hz), 153.97, 153.59, 146.61, 143.43, 141.71 (d, *J* = 7.9 Hz), 139.53, 130.02 (q, *J* = 32.5 Hz), 129.70, 127.46, 125.96, 124.28 (q, *J* = 272.0 Hz), 122.51, 115.13, 113.09 (d, *J* = 22.6 Hz), 81.22, 51.93, 28.38, 17.73. <sup>19</sup>F NMR (376 MHz, Chloroform-*d*) δ -62.80, -113.10. HRMS (ESI-TOF) *m/z* calc'd for C<sub>25</sub>H<sub>25</sub>F<sub>4</sub>N<sub>2</sub>O<sub>2</sub>[M+H]<sup>+</sup>: 461.1847; found: 461.1853.

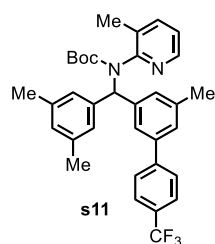

***tert*-Butyl ((3,5-dimethylphenyl)(5-methyl-4'-(trifluoromethyl)-[1,1'-biphenyl]-3-yl)methyl)(3-methylpyridin-2-yl)carbamate (s11)**

Preparative TLC chromatography eluent: hexane/EtOAc = 20:1 v/v.

$^1\text{H}$  NMR (600 MHz, Acetonitrile- $d_3$ , 60 °C)  $\delta$  8.29 (dd,  $J$  = 4.9, 1.7 Hz, 1H), 8.14–6.95 (m, 9H), 7.38 (dd,  $J$  = 7.5, 2.0 Hz, 1H), 7.04 (dd,  $J$  = 7.5, 4.7 Hz, 1H), 6.82 (br s, 1H), 6.48 (s, 1H), 2.33 (br s, 3H), 2.18 (br s, 6H), 2.03 (s, 3H), 1.29 (s, 9H);  $^{13}\text{C}$  NMR (150 MHz, Acetonitrile- $d_3$ , 60 °C)  $\delta$  154.99, 154.41, 146.87, 146.18, 140.01, 139.48, 138.44, 133.93, 129.88 (q,  $J$  = 32.1 Hz), 129.58, 128.77, 128.58, 127.46, 126.87, 126.84, 125.83 (q,  $J$  = 271.1 Hz), 123.78, 81.43, 68.01, 28.63, 21.62, 21.47, 17.99;  $^{19}\text{F}$  NMR (376 MHz, Acetonitrile- $d_3$ )  $\delta$  -63.15. HRMS (ESI-TOF)  $m/z$  calc'd for  $\text{C}_{34}\text{H}_{36}\text{F}_3\text{N}_2\text{O}_2[\text{M}+\text{H}]^+$ : 561.2723; found: 561.2720.

**Hydrogen/deuterium exchange experiment**

Arene (0.05 mmol, 1.0 equiv),  $\text{Pd}(\text{OAc})_2$  (1.1 mg, 5  $\mu\text{mol}$ , 10 mol%), 3,5-di $\text{CF}_3$ -pyridone (1.7 mg, 7.5  $\mu\text{mol}$ , 15 mol%), 4-iodobenzotrifluoride (14.7  $\mu\text{L}$ , 0.1 mmol, 2.0 equiv.), and  $\text{AgOAc}$  (25 mg, 0.15 mmol, 3.0 equiv.) were added into a 2-dram reaction vial.  $\text{CHCl}_3$  (0.5 mL), additive, and  $\text{NBE-CO}_2\text{Me}$  were added to the mixture. The reaction mixture was then stirred at 100 °C for 2 hours. After cooling to room temperature, the mixture was filtered through Celite and eluted with EtOAc (3  $\times$  2 mL). The filtrate was evaporated under reduced pressure. The yield was determined by  $^{19}\text{F}$  NMR and  $^1\text{H}$  NMR analysis of the crude product.

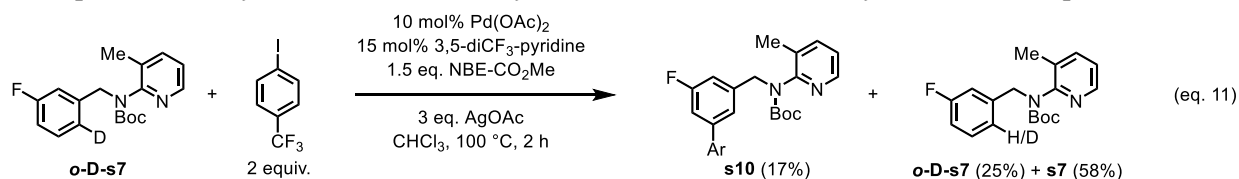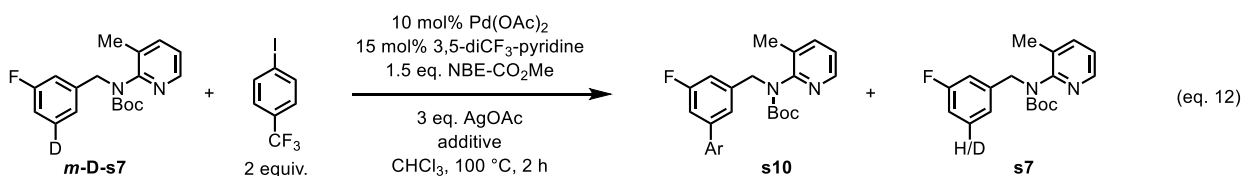

| additive                        | s10 | m-D-s7 | s7 |
|---------------------------------|-----|--------|----|
| none                            | 17% | 73%    | 9% |
| $\text{H}_2\text{O}$ (2 equiv.) | 18% | 68%    | 9% |

## II. Enantioselective Remote C–H Activation of Homobenzylamines

### A. Preparation of Substrates

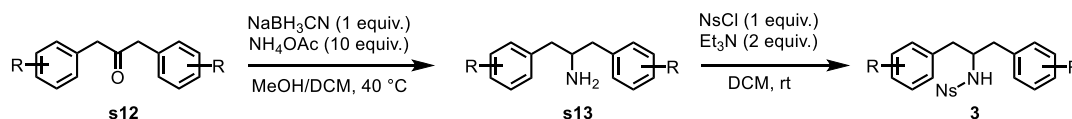

Ketones (**s12**) were synthesized following the literature procedures<sup>39</sup>.

**General procedure for synthesis of substrates:** to a solution of ketone **s12** (1 equiv.) in MeOH/DCM (0.15 M, v/v = 5/1), NaBH<sub>3</sub>CN (1 equiv.) and NH<sub>4</sub>OAc (10 equiv.) were added. The reaction flask was stirred at 40 °C overnight. Aqueous NaOH solution (10 wt%) was added into the reaction mixture, which was then extracted with DCM. The combined organic layers were washed with aqueous NaCl solution, and then dried over Na<sub>2</sub>SO<sub>4</sub>. The organic solvent was concentrated by rotary evaporation to afford compound **s13**.

To a solution of crude amine **s13** (1 equiv.) in DCM (0.15 M), NsCl (1.1 equiv.) was added. Then Et<sub>3</sub>N (2.0 equiv.) was added at 0 °C. The reaction mixture was allowed to warm up to room temperature and stirred overnight. Water was added into the reaction mixture, which was then extracted with EtOAc. The combined organic layers were dried with Na<sub>2</sub>SO<sub>4</sub>. After the organic solvent was concentrated by rotary evaporation, the residue was purified by silica gel chromatography to afford compound **3**.

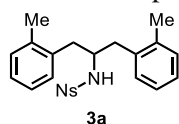

**3a**

#### *N*-(1,3-Di-*o*-tolylpropan-2-yl)-4-nitrobenzenesulfonamide (**3a**)

Chromatography eluent: hexane/EtOAc = 8:1 v/v.

<sup>1</sup>H NMR (600 MHz, Chloroform-*d*) δ 7.99 (d, *J* = 8.9 Hz, 2H), 7.51 (d, *J* = 8.8 Hz, 2H), 7.10 (td, *J* = 7.4, 1.6 Hz, 2H), 7.04 (t, *J* = 7.1 Hz, 2H), 7.02–6.96 (m, 4H), 4.86 (d, *J* = 7.6 Hz, 1H), 3.57 (q, *J* = 7.2 Hz, 1H), 2.88 (d, *J* = 7.2 Hz, 4H), 2.10 (s, 6H); <sup>13</sup>C NMR (150 MHz, Chloroform-*d*) δ 149.47, 145.41, 136.26, 135.53, 130.82, 130.58, 127.59, 127.20, 126.19, 123.98, 55.50, 39.70, 19.25. HRMS (ESI-TOF) *m/z* calc'd for C<sub>23</sub>H<sub>23</sub>N<sub>2</sub>O<sub>4</sub>S[M-H]<sup>-</sup>: 423.1384; found: 423.1383.

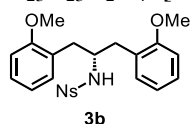

**3b**

#### *N*-(1,3-Bis(2-methoxyphenyl)propan-2-yl)-4-nitrobenzenesulfonamide (**3b**)

Chromatography eluent: hexane/EtOAc = 8:1 v/v.

<sup>1</sup>H NMR (600 MHz, Chloroform-*d*) δ 7.97 (d, *J* = 8.8 Hz, 2H), 7.53 (d, *J* = 8.9 Hz, 2H), 7.17 (ddd, *J* = 8.2, 7.4, 1.8 Hz, 2H), 6.95 (dd, *J* = 7.4, 1.8 Hz, 2H), 6.81–6.74 (m, 4H), 5.37 (d, *J* = 6.6 Hz, 1H), 3.82 (s, 6H), 3.67 (dddd, *J* = 7.8, 6.5, 5.3, 2.4 Hz, 1H), 2.93 (dd, *J* = 13.7, 7.9 Hz, 2H), 2.77 (dd, *J* = 13.7, 5.9 Hz, 2H); <sup>13</sup>C NMR (150 MHz, Chloroform-*d*) δ 157.42, 149.37, 145.68, 131.44, 128.19, 127.67, 126.25, 123.78, 120.95, 110.64, 56.90, 55.54, 36.25. HRMS (ESI-TOF) *m/z* calc'd for C<sub>23</sub>H<sub>25</sub>N<sub>2</sub>O<sub>6</sub>S[M+H]<sup>+</sup>: 457.1428; found: 457.1435.

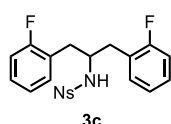

**3c**

#### *N*-(1,3-Bis(2-fluorophenyl)propan-2-yl)-4-nitrobenzenesulfonamide (**3c**)

Chromatography eluent: hexane/EtOAc = 8:1 v/v.

$^1\text{H}$  NMR (600 MHz, Chloroform-*d*)  $\delta$  8.00 (d,  $J$  = 8.9 Hz, 2H), 7.59 (d,  $J$  = 8.9 Hz, 2H), 7.15 (tdd,  $J$  = 7.6, 5.3, 1.9 Hz, 2H), 7.06 (td,  $J$  = 7.6, 1.8 Hz, 2H), 6.98 (td,  $J$  = 7.5, 1.2 Hz, 2H), 6.87 (ddd,  $J$  = 9.7, 8.2, 1.2 Hz, 2H), 4.65 (d,  $J$  = 8.5 Hz, 1H), 3.77 (dtd,  $J$  = 13.9, 7.8, 5.9 Hz, 1H), 2.93–2.77 (m, 4H);  $^{13}\text{C}$  NMR (150 MHz, Chloroform-*d*)  $\delta$  161.23 (d,  $J$  = 244.9 Hz, 1H), 149.61, 145.74, 131.87 (d,  $J$  = 4.0 Hz, 1H), 128.98 (d,  $J$  = 8.2 Hz, 1H), 127.73, 124.26 (d,  $J$  = 3.5 Hz, 1H), 124.07, 124.05 (d,  $J$  = 15.5 Hz, 1H), 115.56 (d,  $J$  = 22.1 Hz, 1H), 56.14, 35.28;  $^{19}\text{F}$  NMR (376 MHz, Chloroform-*d*)  $\delta$  -117.50. HRMS (ESI-TOF)  $m/z$  calc'd for  $\text{C}_{21}\text{H}_{17}\text{F}_2\text{N}_2\text{O}_4\text{S}[\text{M-H}]^-$ : 431.0883; found: 431.0884.

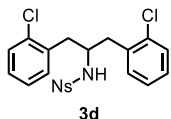

### ***N*-(1,3-Bis(2-chlorophenyl)propan-2-yl)-4-nitrobenzenesulfonamide (3d)**

Chromatography eluent: hexane/EtOAc = 8:1 v/v.

$^1\text{H}$  NMR (600 MHz, Chloroform-*d*)  $\delta$  8.00 (d,  $J$  = 8.8 Hz, 2H), 7.60 (d,  $J$  = 8.9 Hz, 2H), 7.23–7.18 (m, 2H), 7.15–7.09 (m, 6H), 4.89 (d,  $J$  = 8.4 Hz, 1H), 3.96 (dt,  $J$  = 8.3, 7.2 Hz, 1H), 3.01 (d,  $J$  = 7.1 Hz, 4H);  $^{13}\text{C}$  NMR (150 MHz, Chloroform-*d*)  $\delta$  149.54, 145.53, 135.07, 134.28, 131.88, 129.83, 128.55, 127.68, 127.09, 124.02, 55.54, 39.64. HRMS (ESI-TOF)  $m/z$  calc'd for  $\text{C}_{21}\text{H}_{19}\text{Cl}_2\text{N}_2\text{O}_4\text{S}[\text{M-H}]^-$ : 463.0292; found: 463.0285.

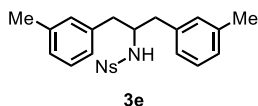

### ***N*-(1,3-Di-*m*-tolylpropan-2-yl)-4-nitrobenzenesulfonamide (3e)**

Chromatography eluent: hexane/EtOAc = 8:1 v/v.

$^1\text{H}$  NMR (600 MHz, Chloroform-*d*)  $\delta$  8.01 (d,  $J$  = 8.9 Hz, 2H), 7.52 (d,  $J$  = 9.0 Hz, 2H), 7.08 (t,  $J$  = 7.5 Hz, 2H), 6.99 (d,  $J$  = 7.7 Hz, 3H), 6.84 (d,  $J$  = 7.6 Hz, 2H), 6.81 (s, 2H), 4.52 (d,  $J$  = 8.0 Hz, 1H), 3.61 (dt,  $J$  = 7.7, 5.7 Hz, 1H), 2.86 (dd,  $J$  = 13.8, 5.8 Hz, 2H), 2.69 (dd,  $J$  = 13.7, 7.3 Hz, 2H), 2.23 (s, 6H);  $^{13}\text{C}$  NMR (150 MHz, Chloroform-*d*)  $\delta$  149.50, 145.73, 138.41, 136.97, 130.29, 128.70, 127.80, 127.70, 126.59, 123.90, 57.66, 41.67, 21.42. HRMS (ESI-TOF)  $m/z$  calc'd for  $\text{C}_{23}\text{H}_{23}\text{N}_2\text{O}_4\text{S}[\text{M-H}]^-$ : 423.1384; found: 423.1386.

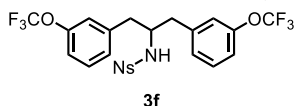

### ***N*-(1,3-Bis(3-(trifluoromethoxy)phenyl)propan-2-yl)-4-nitrobenzenesulfonamide (3f)**

Chromatography eluent: hexane/EtOAc = 8:1 v/v.

$^1\text{H}$  NMR (600 MHz, Chloroform-*d*)  $\delta$  8.06 (d,  $J$  = 8.9 Hz, 2H), 7.60 (d,  $J$  = 8.9 Hz, 2H), 7.22 (t,  $J$  = 7.9 Hz, 2H), 7.05 (d,  $J$  = 8.3 Hz, 2H), 6.98 (d,  $J$  = 7.6 Hz, 2H), 6.87 (s, 2H), 4.62 (d,  $J$  = 8.4 Hz, 1H), 3.68 (dtd,  $J$  = 13.5, 7.6, 5.7 Hz, 1H), 2.92 (dd,  $J$  = 13.9, 5.7 Hz, 2H), 2.76 (dd,  $J$  = 13.9, 7.4 Hz, 2H);  $^{13}\text{C}$  NMR (150 MHz, Chloroform-*d*)  $\delta$  149.81 (q,  $J$  = 1.7 Hz), 149.46, 145.51, 139.06, 130.21, 127.84, 127.71, 123.02, 121.32, 120.46 (d,  $J$  = 257.6 Hz), 119.57, 57.23, 41.42;  $^{19}\text{F}$  NMR (376 MHz, Chloroform-*d*)  $\delta$  -58.05. HRMS (ESI-TOF)  $m/z$  calc'd for  $\text{C}_{23}\text{H}_{17}\text{F}_6\text{N}_2\text{O}_6\text{S}[\text{M-H}]^-$ : 563.0717; found: 563.0719.

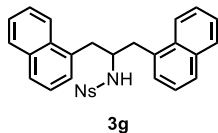

### ***N*-(1,3-Di(naphthalen-1-yl)propan-2-yl)-4-nitrobenzenesulfonamide (3g)**

Chromatography eluent: hexane/EtOAc = 6:1 v/v.

$^1\text{H}$  NMR (600 MHz, Chloroform-*d*)  $\delta$  7.70 (d,  $J$  = 8.2 Hz, 3H), 7.68 (d,  $J$  = 8.2 Hz, 3H), 7.44 (d,  $J$  = 8.9 Hz, 1H), 7.41 (d,  $J$  = 8.5 Hz, 2H), 7.38 (ddd,  $J$  = 8.1, 6.8, 1.1 Hz, 2H), 7.33 (dd,  $J$  = 8.2, 6.9 Hz, 2H), 7.24 (dd,  $J$  = 7.0, 1.2 Hz, 2H), 7.21 (ddd,  $J$  = 8.6, 7.0, 1.5 Hz, 2H), 7.18 (d,  $J$  = 9.0 Hz, 1H), 4.66 (d,  $J$  = 6.4 Hz, 1H), 3.90 (h,  $J$  = 7.0 Hz, 1H), 3.34 (dd,  $J$  = 14.1, 7.5 Hz, 2H), 3.27 (dd,  $J$  = 14.1, 6.7 Hz, 2H);  $^{13}\text{C}$  NMR (150 MHz,

Chloroform-*d*)  $\delta$  148.74, 143.66, 134.07, 133.29, 131.44, 128.88, 128.14, 128.10, 126.90, 126.31, 126.05, 125.44, 123.45, 123.09, 54.78, 39.89. HRMS (ESI-TOF)  $m/z$  calc'd for  $C_{29}H_{23}N_2O_4S[M-H]^-$ : 495.1384; found: 495.1379.

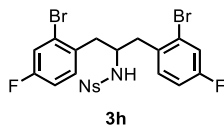

### ***N*-(1,3-Bis(2-bromo-4-fluorophenyl)propan-2-yl)-4-nitrobenzenesulfonamide (3h)**

Chromatography eluent: hexane/EtOAc = 8:1 v/v.

$^1H$  NMR (600 MHz, Chloroform-*d*)  $\delta$  8.08 (d,  $J$  = 8.8 Hz, 1H), 7.62 (d,  $J$  = 8.8 Hz, 2H), 7.12 (dd,  $J$  = 8.1, 2.6 Hz, 2H), 7.09 (dd,  $J$  = 8.5, 5.9 Hz, 2H), 6.87 (td,  $J$  = 8.1, 2.6 Hz, 2H), 4.76 (d,  $J$  = 8.9 Hz, 1H), 3.94 (qt,  $J$  = 8.6, 5.8 Hz, 1H), 2.99 (dd,  $J$  = 14.0, 5.8 Hz, 2H), 2.93 (dd,  $J$  = 14.1, 8.6 Hz, 2H);  $^{13}C$  NMR (150 MHz, Chloroform-*d*)  $\delta$  162.32 (d,  $J$  = 251.4 Hz), 149.66, 145.77, 132.61 (d,  $J$  = 3.8 Hz), 132.57 (d,  $J$  = 8.3 Hz), 127.81, 124.72 (d,  $J$  = 9.4 Hz), 124.03, 120.33 (d,  $J$  = 24.3 Hz), 114.93 (d,  $J$  = 20.9 Hz), 55.73, 41.25;  $^{19}F$  NMR (376 MHz, Chloroform-*d*)  $\delta$  -112.74. HRMS (ESI-TOF)  $m/z$  calc'd for  $C_{21}H_{15}Br_2F_2N_2O_4S[M-H]^-$ : 586.9093; found: 586.9088.

Substrates **3i**, **3j**, **3k** and **3l** were synthesized following the literature procedures<sup>29</sup>.

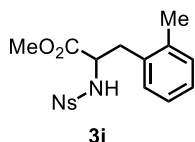

### **Methyl 2-((4-nitrophenyl)sulfonamido)-3-(*o*-tolyl)propanoate (3i)**

Chromatography eluent: hexane/EtOAc = 5:1 v/v.

$^1H$  NMR (600 MHz, Chloroform-*d*)  $\delta$  8.16 (d,  $J$  = 8.8 Hz, 2H), 7.75 (d,  $J$  = 8.9 Hz, 2H), 7.10 (td,  $J$  = 7.4, 1.4 Hz, 1H), 7.06–6.98 (m, 2H), 6.94 (dd,  $J$  = 7.6, 1.3 Hz, 1H), 5.41 (d,  $J$  = 7.9 Hz, 1H), 4.22 (td,  $J$  = 8.4, 5.3 Hz, 1H), 3.63 (s, 3H), 3.13 (dd,  $J$  = 14.2, 5.5 Hz, 1H), 2.89 (dd,  $J$  = 14.1, 8.8 Hz, 1H), 2.24 (s, 3H);  $^{13}C$  NMR (150 MHz, Chloroform-*d*)  $\delta$  171.79, 149.97, 145.58, 136.58, 133.49, 130.84, 130.31, 128.19, 127.68, 126.31, 124.20, 56.53, 52.95, 36.81, 19.43. HRMS (ESI-TOF)  $m/z$  calc'd for  $C_{17}H_{19}N_2O_6S[M+H]^+$ : 379.0958; found: 379.0957.

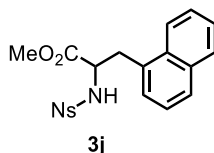

### **Methyl 3-(naphthalen-1-yl)-2-((4-nitrophenyl)sulfonamido)propanoate (3j)**

Chromatography eluent: hexane/EtOAc = 5:1 v/v.

$^1H$  NMR (600 MHz, Chloroform-*d*)  $\delta$  7.80 (d,  $J$  = 8.4 Hz, 1H), 7.77 (d,  $J$  = 8.8 Hz, 2H), 7.70 (dd,  $J$  = 8.1, 1.4 Hz, 1H), 7.65 (d,  $J$  = 8.2 Hz, 1H), 7.47 (ddd,  $J$  = 8.4, 6.8, 1.5 Hz, 1H), 7.43 (ddd,  $J$  = 8.0, 6.8, 1.2 Hz, 1H), 7.38 (d,  $J$  = 8.8 Hz, 2H), 7.27 (dd,  $J$  = 8.2, 7.0 Hz, 1H), 7.27 (d,  $J$  = 6.6 Hz, 1H), 5.35 (d,  $J$  = 9.3 Hz, 1H), 4.33 (td,  $J$  = 9.8, 4.5 Hz, 1H), 3.76 (s, 3H), 3.65 (dd,  $J$  = 14.4, 4.5 Hz, 1H), 3.12 (dd,  $J$  = 14.3, 10.3 Hz, 1H);  $^{13}C$  NMR (150 MHz, Chloroform-*d*)  $\delta$  171.86, 149.43, 144.48, 133.95, 131.31, 131.12, 129.06, 128.46, 128.44, 127.54, 126.76, 126.17, 125.44, 123.58, 122.85, 56.42, 53.18, 36.61. HRMS (ESI-TOF)  $m/z$  calc'd for  $C_{20}H_{19}N_2O_6S[M+H]^+$ : 415.0958; found: 415.0952.

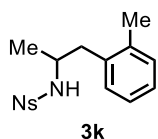

### **4-Nitro-*N*-(1-(*o*-tolyl)propan-2-yl)benzenesulfonamide (3k)**

Chromatography eluent: hexane/EtOAc = 8:1 v/v.

$^1\text{H}$  NMR (600 MHz, Chloroform-*d*)  $\delta$  8.13 (d,  $J$  = 8.9 Hz, 2H), 7.72 (d,  $J$  = 8.8 Hz, 2H), 7.07 (td,  $J$  = 7.5, 1.4 Hz, 1H), 7.00 (t,  $J$  = 7.4 Hz, 1H), 6.95 (d,  $J$  = 7.5 Hz, 1H), 6.91 (dd,  $J$  = 7.5, 1.4 Hz, 1H), 4.73 (d,  $J$  = 7.7 Hz, 1H), 3.61–3.46 (m, 1H), 2.74 (dd,  $J$  = 14.1, 5.8 Hz, 1H), 2.64 (dd,  $J$  = 14.1, 8.7 Hz, 1H), 2.12 (s, 3H), 1.28 (d,  $J$  = 6.5 Hz, 3H);  $^{13}\text{C}$  NMR (150 MHz, Chloroform-*d*)  $\delta$  149.75, 146.21, 136.21, 135.49, 130.77, 130.31, 127.95, 127.21, 126.25, 124.19, 51.01, 41.19, 22.92, 19.41. HRMS (ESI-TOF)  $m/z$  calc'd for  $\text{C}_{16}\text{H}_{19}\text{N}_2\text{O}_4\text{S}[\text{M}+\text{H}]^+$ : 335.1060; found: 335.1055.

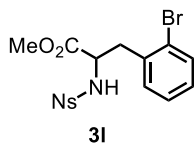

### Methyl 3-(2-bromophenyl)-2-((4-nitrophenyl)sulfonamido)propanoate (**3i**)

Chromatography eluent: hexane/EtOAc = 5:1 v/v.

$^1\text{H}$  NMR (600 MHz, Chloroform-*d*)  $\delta$  8.15 (d,  $J$  = 8.8 Hz, 2H), 7.78 (d,  $J$  = 8.8 Hz, 2H), 7.38 (dd,  $J$  = 8.0, 1.2 Hz, 1H), 7.14 (td,  $J$  = 7.4, 1.3 Hz, 1H), 7.10 (dd,  $J$  = 7.6, 1.9 Hz, 1H), 7.04 (td,  $J$  = 7.7, 1.8 Hz, 1H), 5.50 (d,  $J$  = 9.8 Hz, 1H), 4.37 (td,  $J$  = 9.8, 5.2 Hz, 1H), 3.68 (s, 3H), 3.23 (dd,  $J$  = 14.0, 5.3 Hz, 1H), 2.98 (dd,  $J$  = 13.9, 9.8 Hz, 1H);  $^{13}\text{C}$  NMR (150 MHz, Chloroform-*d*)  $\delta$  171.56, 149.98, 145.49, 134.95, 133.17, 131.95, 129.20, 128.24, 127.76, 124.80, 124.20, 55.93, 53.13, 39.36. HRMS (ESI-TOF)  $m/z$  calc'd for  $\text{C}_{16}\text{H}_{16}\text{BrN}_2\text{O}_6\text{S}[\text{M}+\text{H}]^+$ : 442.9907; found: 442.9911.

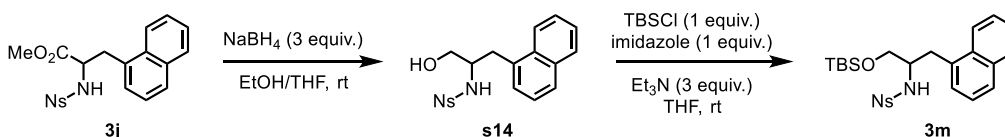

### *N*-(1-((*tert*-Butyldimethylsilyl)oxy)-3-(naphthalen-1-yl)propan-2-yl)-4-nitrobenzenesulfonamide (**3m**)

To a solution of ester **3j** (1.24 g, 3 mmol, 1.0 equiv.) in EtOH/THF (15 mL/15 mL),  $\text{NaBH}_4$  (0.34 g, 9.0 mmol, 3.0 equiv.) was added. The reaction mixture was stirred at room temperature overnight. Water was added into the reaction mixture, which was then extracted with EtOAc. The combined organic layers were washed with aqueous NaCl solution, and then dried over  $\text{Na}_2\text{SO}_4$ . The organic solvent was concentrated by rotary evaporation to afford compound **s14**.

To a solution of crude alcohol **s14** in THF (20 mL),  $\text{Et}_3\text{N}$  (0.83 mL, 6.0 mmol, 2.0 equiv.), imidazole (0.204 g, 3.0 mmol, 1.0 equiv.) and TBSCl (0.45 g, 3.0 mmol, 1.0 equiv.) were added at 0 °C. The reaction mixture was stirred at room temperature overnight. Aqueous  $\text{NH}_4\text{Cl}$  solution was added into the reaction mixture, which was then extracted with EtOAc. The combined organic layers were dried with  $\text{Na}_2\text{SO}_4$ . After the organic solvent was concentrated by rotary evaporation, the residue was purified by silica gel chromatography (hexane/EtOAc = 8:1 v/v) to afford 0.92 g compound **3m** as a white solid (61% yield for two steps).

$^1\text{H}$  NMR (600 MHz, Chloroform-*d*)  $\delta$  7.73 (d,  $J$  = 7.7 Hz, 1H), 7.66 (d,  $J$  = 8.9 Hz, 2H), 7.63 (dd,  $J$  = 7.5, 1.9 Hz, 1H), 7.59 (d,  $J$  = 8.2 Hz, 1H), 7.39 (dtd,  $J$  = 13.7, 6.8, 1.6 Hz, 2H), 7.32 (d,  $J$  = 8.8 Hz, 2H), 7.25 (dd,  $J$  = 8.0, 6.9 Hz, 1H), 7.11 (d,  $J$  = 6.8 Hz, 1H), 5.02–4.73 (m, 1H), 3.92 (dd,  $J$  = 9.7, 2.9 Hz, 1H), 3.68 (dd,  $J$  = 9.7, 6.3 Hz, 1H), 3.60 (dtt,  $J$  = 13.7, 7.1, 3.8 Hz, 1H), 3.54 (dd,  $J$  = 14.3, 4.6 Hz, 1H), 2.84 (dd,  $J$  = 14.3, 10.1 Hz, 1H), 0.98 (s, 9H), 0.16 (s, 3H), 0.14 (s, 3H);  $^{13}\text{C}$  NMR (150 MHz, Chloroform-*d*)  $\delta$  149.05, 144.59, 133.95, 133.24, 131.39, 128.83, 127.93, 127.88, 127.18, 126.31, 126.03, 125.42, 123.36, 123.30, 66.08, 55.79, 35.83, 26.06, 18.45, -5.19, -5.25. HRMS (ESI-TOF)  $m/z$  calc'd for  $\text{C}_{25}\text{H}_{33}\text{N}_2\text{O}_5\text{SSi}[\text{M}+\text{H}]^+$ : 501.1874; found: 501.1864.

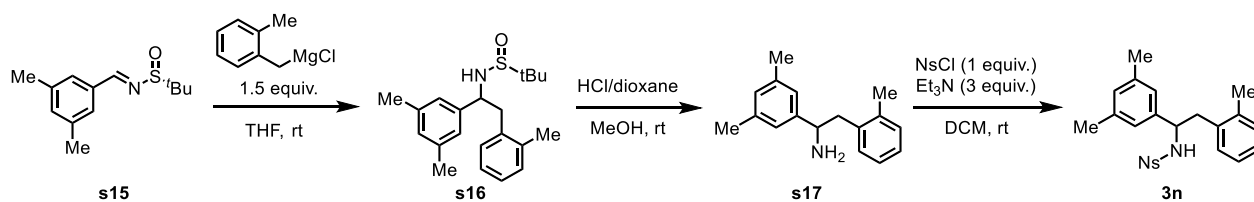

### *N*-(1-(3,5-Dimethylphenyl)-2-(*o*-tolyl)ethyl)-4-nitrobenzenesulfonamide (**3n**)

To a solution of sulfinyl imine **s15** (3.43 g, 10 mmol, 1.0 equiv.) in dry THF (30 mL), a solution of (2-methylbenzyl)magnesium chloride solution (1 M in Et<sub>2</sub>O, 15 mL, 15 mmol, 1.5 equiv.) was added at 0 °C. The reaction mixture was stirred at room temperature overnight. Water was added into the reaction mixture, which was then extracted with EtOAc. The combined organic layers were dried with Na<sub>2</sub>SO<sub>4</sub>. After the organic solvent was concentrated by rotary evaporation, the residue was purified by silica gel chromatography (hexane/EtOAc = 4:1 v/v) to afford 2.72 g compound **s16** as a colorless liquid (79% yield).

To a solution of compound **s16** (2.72 g, 7.9 mmol, 1 equiv.) in MeOH (30 mL), hydrochloric acid solution (4 M in dioxane, 7.9 mL) was added. The reaction mixture was stirred at room temperature overnight. Aqueous Na<sub>2</sub>CO<sub>3</sub> solution was added into the reaction mixture, which was then extracted with EtOAc. The combined organic layers were dried with Na<sub>2</sub>SO<sub>4</sub>. The organic solvent was concentrated by rotary evaporation to afford compound **s17**.

To a solution of crude amine **s17** in DCM (60 mL), NsCl (1.75 g, 7.9 mmol, 1.0 equiv.) was added. Then Et<sub>3</sub>N (2.2 mL, 15.8 mmol, 2.0 equiv.) was added at 0 °C. The reaction mixture was allowed to warm up to room temperature and stirred overnight. Water was added into the reaction mixture, which was then extracted with EtOAc. The combined organic layers were dried with Na<sub>2</sub>SO<sub>4</sub>. After the organic solvent was concentrated by rotary evaporation, the residue was purified by silica gel chromatography (hexane/EtOAc = 6:1 v/v.) to afford 2.71 g compound **3n** as a white solid (81% yield for two steps).

<sup>1</sup>H NMR (600 MHz, Chloroform-*d*) δ 8.00 (d, *J* = 8.8 Hz, 2H), 7.56 (d, *J* = 8.8 Hz, 2H), 7.11 (td, *J* = 7.4, 1.3 Hz, 1H), 7.06–7.00 (m, 2H), 6.96 (d, *J* = 7.4 Hz, 1H), 6.80 (s, 1H), 6.66 (s, 2H), 5.20 (d, *J* = 4.0 Hz, 1H), 4.51 (dt, *J* = 9.6, 4.9 Hz, 1H), 3.01 (dd, *J* = 14.4, 5.5 Hz, 1H), 2.90 (dd, *J* = 14.4, 9.3 Hz, 1H), 2.17 (s, 9H); <sup>13</sup>C NMR (150 MHz, Chloroform-*d*) δ 149.57, 146.05, 140.15, 138.30, 136.51, 134.80, 130.84, 130.13, 129.53, 128.12, 127.39, 126.35, 124.48, 123.64, 58.56, 41.60, 21.27, 19.49. HRMS (ESI-TOF) *m/z* calc'd for C<sub>23</sub>H<sub>24</sub>N<sub>2</sub>O<sub>4</sub>SNa[M+Na]<sup>+</sup>: 447.1349; found: 447.1350.

## B. Optimization of the Reaction Conditions

Table S7. Chiral transient mediator screening\*

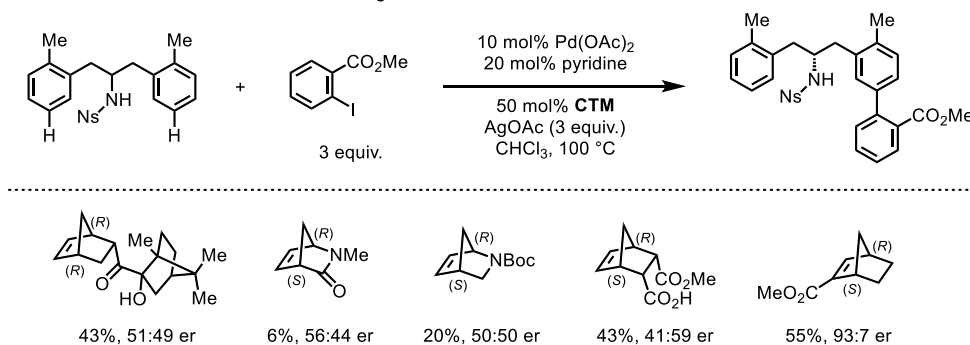

\*The yields were determined by <sup>1</sup>H-NMR using Cl<sub>2</sub>HC-CHCl<sub>2</sub> as the standard.

Table S8. Additive screening\*

Reaction scheme for Table S8: A chiral homobenzylamine derivative reacts with an iodide-substituted methyl benzoate derivative (1 equiv.) in the presence of 10 mol% Pd(OAc)<sub>2</sub>, 20 mol% pyridine, 15 mol% additive, 50 mol% (+)-NBE-CO<sub>2</sub>Me, AgOAc (3 equiv.), and CHCl<sub>3</sub> at 100 °C to form a desymmetrized product.

| additive                 | yield (%) | er       |
|--------------------------|-----------|----------|
| none                     | 50%       | 72:28 er |
| (R)-BNDHP                | 43%       | 62:38 er |
| (S)-BNDHP                | 46%       | 62:38 er |
| Me                       | 45%       | 66:34    |
| CF <sub>3</sub>          | 42%       | 69:31 er |
| Me                       | 42%       | 69:31 er |
| HDQ                      | 26%       | 64:36 er |
| (DHQD) <sub>2</sub> PHAL | 24%       | 67:33 er |

\*The yields were determined by <sup>1</sup>H-NMR using Cl<sub>2</sub>HC-CHCl<sub>2</sub> as the standard.

Table S9. Ligand and solvent screening\*

Reaction scheme for Table S9: A chiral homobenzylamine derivative reacts with an iodide-substituted methyl benzoate derivative (3 equiv.) in the presence of 10 mol% Pd(OAc)<sub>2</sub>, 20 mol% ligand, 50 mol% (+)-NBE-CO<sub>2</sub>Me, AgOAc (3 equiv.), and solvent at 100 °C to form a desymmetrized product.

| ligand   | yield (%) | er       |
|----------|-----------|----------|
| pyridine | 55%       | 92:8 er  |
| Me       | 35%       | 82:18    |
| Ac       | 54%       | 91:9 er  |
| Ph       | 55%       | 93:7 er  |
| Me       | 45%       | 92:8 er  |
| OH       | 20%       | 86:14 er |

  

| solvent           | yield (%) | er                   |
|-------------------|-----------|----------------------|
| CHCl <sub>3</sub> | 55%       | 93:7 er              |
| DCE               | 54%       | 92:8 er              |
| toluene           | 46%       | 90:10 er             |
| TBME              | 63%       | 99:1 er              |
| TBME              | 72%       | 97:3 er <sup>†</sup> |

\*The yields were determined by <sup>1</sup>H-NMR using Cl<sub>2</sub>HC-CHCl<sub>2</sub> as the standard. <sup>†</sup>20 mol% (+)-NBE-CO<sub>2</sub>Me, 90 °C.

Table S10. Additive screening\*

Reaction scheme for Table S10: A chiral homobenzylamine derivative reacts with an iodide-substituted methyl benzoate derivative (3 equiv.) in the presence of x mol% Pd(OAc)<sub>2</sub>, 2x mol% 3-Me-5-Ph-pyridine, 20 mol% (+)-NBE-CO<sub>2</sub>Me, AgOAc (3 equiv.), TBME, 90 °C, N<sub>2</sub>, 24 h to form a desymmetrized product.

| loading of Pd(OAc) <sub>2</sub> | result*            |
|---------------------------------|--------------------|
| 10 mol%                         | 71% yield, 97:3 er |
| 5 mol%                          | 70% yield, 97:3 er |
| 2.5 mol%                        | 65% yield, 97:3 er |

\*Isolated yield

### C. Pd/(+)-NBE-CO<sub>2</sub>Me Catalyzed Desymmetrization of Homobenzylamines

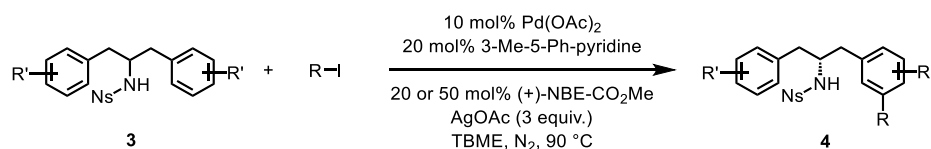

**General procedure:** Arene **3** (0.10 mmol, 1.0 equiv), Pd(OAc)<sub>2</sub> (2.2 mg, 10 μmol, 10 mol%), 3-methyl-5-phenylpyridine (3.4 mg, 20 μmol, 20 mol%), iodide (0.3 mmol, 3.0 equiv.), and AgOAc (50 mg, 0.30 mmol, 3.0 equiv.) were added into a 2-dram reaction vial. TBME (1 mL) and (+)-NBE-CO<sub>2</sub>Me (20 mol% or 50 mol%) were added to the mixture. The vial was flushed with N<sub>2</sub>, and then capped. The reaction mixture was then stirred at 90 °C for 24 hours. After cooling to room temperature, the mixture was filtered through Celite and eluted with EtOAc (3 × 2 mL). The filtrate was evaporated under reduced pressure. Purification by preparative TLC chromatography afforded the title compound.



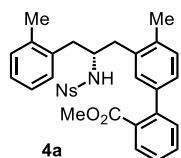

**Methyl (R)-4'-methyl-3'-(2-((4-nitrophenyl)sulfonamido)-3-(*o*-tolyl)propyl)-[1,1'-biphenyl]-2-carboxylate (4a)**

Substrate **3a** was arylated following the general procedure by using methyl 2-iodobenzoate (44  $\mu$ L, 0.3 mmol, 3.0 equiv.), (+)-NBE-CO<sub>2</sub>Me (3.0 mg, 20  $\mu$ mol, 20 mol%), and TBME (1 mL). After purification by preparative TLC chromatography (hexane/EtOAc = 3:1 v/v), compound **4a** (39.7 mg) was obtained in 71% yield as a colorless oil.

<sup>1</sup>H NMR (600 MHz, Chloroform-*d*)  $\delta$  7.99 (d,  $J$  = 8.8 Hz, 2H), 7.87 (dd,  $J$  = 7.8, 1.4 Hz, 1H), 7.57 (d,  $J$  = 8.8 Hz, 2H), 7.53 (td,  $J$  = 7.6, 1.4 Hz, 1H), 7.41 (td,  $J$  = 7.6, 1.3 Hz, 1H), 7.30 (dd,  $J$  = 7.7, 1.2 Hz, 1H), 7.11–7.03 (m, 3H), 7.03–6.95 (m, 4H), 4.91 (d,  $J$  = 6.7 Hz, 1H), 3.72 (s, 3H), 3.56 (q,  $J$  = 7.0 Hz, 1H), 3.02–2.82 (m, 4H), 2.11 (s, 3H), 2.04 (s, 3H); <sup>13</sup>C NMR (150 MHz, Chloroform-*d*)  $\delta$  168.77, 149.51, 145.49, 142.39, 139.12, 136.29, 135.68, 135.39, 134.76, 131.71, 131.23, 130.96, 130.80, 130.70, 130.59, 130.28, 130.20, 127.98, 127.40, 127.24, 127.15, 126.17, 124.01, 54.83, 52.35, 39.76, 39.52, 19.33, 18.96. HRMS (ESI-TOF)  $m/z$  calc'd for C<sub>31</sub>H<sub>31</sub>N<sub>2</sub>O<sub>6</sub>S [M+H]<sup>+</sup>: 559.1897; found: 559.1904.

SFC Chiralpak<sup>®</sup> OJ-3 column (25% isopropanol, 2.0 mL/min)  $t_r$  = 3.09 min (minor), 4.57 min (major): 97:3 er. The absolute stereochemistry was assigned by analogy to compounds **4m** and **4n**.

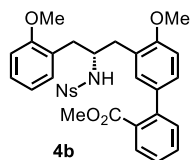

**Methyl (R)-4'-methoxy-3'-(3-(2-methoxyphenyl)-2-((4-nitrophenyl)sulfonamido)propyl)-[1,1'-biphenyl]-2-carboxylate (4b)**

Substrate **3b** was arylated following the general procedure by using methyl 2-iodobenzoate (44  $\mu$ L, 0.3 mmol, 3.0 equiv.), (+)-NBE-CO<sub>2</sub>Me (7.5 mg, 50  $\mu$ mol, 50 mol%), and TBME (0.5 mL). After purification by preparative TLC chromatography (hexane/EtOAc = 2:1 v/v), compound **4b** (45.0 mg) was obtained in 76% yield as a colorless oil.

<sup>1</sup>H NMR (600 MHz, Chloroform-*d*)  $\delta$  7.98 (d,  $J$  = 8.7 Hz, 2H), 7.81 (dd,  $J$  = 7.8, 1.4 Hz, 1H), 7.58 (d,  $J$  = 8.7 Hz, 2H), 7.51 (td,  $J$  = 7.6, 1.4 Hz, 1H), 7.38 (td,  $J$  = 7.7, 1.3 Hz, 1H), 7.27 (dd,  $J$  = 7.8, 1.1 Hz, 1H), 7.16–7.09 (m, 2H), 7.01 (d,  $J$  = 2.3 Hz, 1H), 6.91 (dd,  $J$  = 7.4, 1.7 Hz, 1H), 6.77 (d,  $J$  = 8.3 Hz, 1H), 6.73 (t,  $J$  = 7.4 Hz, 1H), 6.70 (d,  $J$  = 8.1 Hz, 1H), 5.39 (d,  $J$  = 6.6 Hz, 1H), 3.80 (s, 3H), 3.76 (s, 3H), 3.75–3.70 (m, 1H), 3.68 (s, 3H), 2.97 (dd,  $J$  = 13.7, 7.3 Hz, 1H), 2.89–2.81 (m, 2H), 2.76 (dd,  $J$  = 13.8, 5.5 Hz, 1H); <sup>13</sup>C NMR (150 MHz, Chloroform-*d*)  $\delta$  169.03, 157.37, 156.94, 149.38, 145.91, 142.01, 133.75, 131.78, 131.49, 131.43, 130.82, 130.53, 130.05, 128.16, 128.05, 127.88, 127.08, 126.24, 125.68, 123.78, 110.56, 110.23, 56.34, 55.54, 55.49, 52.18, 36.74, 35.77. HRMS (ESI-TOF)  $m/z$  calc'd for C<sub>31</sub>H<sub>31</sub>N<sub>2</sub>O<sub>8</sub>S [M+H]<sup>+</sup>: 591.1796; found: 591.1801.

SFC Chiralpak<sup>®</sup> AD-3 column (40% isopropanol, 3.0 mL/min)  $t_r$  = 2.84 min (minor), 4.41 min (major): 87:13 er.

The absolute stereochemistry was assigned by analogy to compounds **4m** and **4n**.

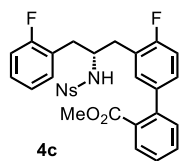

**Methyl (R)-4'-fluoro-3'-(3-(2-fluorophenyl)-2-((4-nitrophenyl)sulfonamido)propyl)-[1,1'-biphenyl]-2-carboxylate (4c)**

Substrate **3c** was arylated following the general procedure by using Pd(OAc)<sub>2</sub> (3.3 mg, 15 μmol, 15 mol%), ligand (5.1 mg, 30 μmol, 30 mol%), methyl 2-iodobenzoate (44 μL, 0.3 mmol, 3.0 equiv.), (+)-NBE-CO<sub>2</sub>Me (7.5 mg, 50 μmol, 50 mol%), and TBME (0.5 mL). After purification by preparative TLC chromatography (hexane/EtOAc = 2:1 v/v), compound **4c** (33.8 mg) was obtained in 60% yield as a colorless oil.

<sup>1</sup>H NMR (600 MHz, Chloroform-*d*) δ 8.03 (d, *J* = 8.9 Hz, 2H), 7.91 (dd, *J* = 7.8, 1.4 Hz, 1H), 7.66 (d, *J* = 8.8 Hz, 2H), 7.54 (td, *J* = 7.5, 1.4 Hz, 1H), 7.43 (td, *J* = 7.7, 1.3 Hz, 1H), 7.28 (d, *J* = 1.2 Hz, 1H), 7.16–7.09 (m, 3H), 7.07 (td, *J* = 7.5, 1.8 Hz, 1H), 6.95 (td, *J* = 7.4, 1.2 Hz, 1H), 6.89 (t, *J* = 9.4 Hz, 1H), 6.83 (ddd, *J* = 9.8, 8.2, 1.2 Hz, 1H), 4.96 (d, *J* = 8.3 Hz, 1H), 3.86–3.79 (m, 1H), 3.73 (s, 3H), 2.99–2.87 (m, 3H), 2.82 (dd, *J* = 14.0, 8.3 Hz, 1H); <sup>13</sup>C NMR (150 MHz, Chloroform-*d*) δ 168.41, 161.21 (d, *J* = 244.9 Hz), 160.70 (d, *J* = 245.7 Hz), 149.60, 145.91, 141.71, 137.59 (d, *J* = 3.8 Hz), 132.45 (d, *J* = 4.8 Hz), 131.92 (d, *J* = 4.7 Hz), 131.84, 130.98, 130.46, 130.05, 128.89 (d, *J* = 3.7 Hz), 128.84 (d, *J* = 3.3 Hz), 127.92, 127.70, 124.35 (d, *J* = 3.5 Hz), 124.26 (d, *J* = 15.5 Hz), 124.08, 123.21 (d, *J* = 16.4 Hz), 115.46 (d, *J* = 22.2 Hz), 115.14 (d, *J* = 22.6 Hz), 55.63, 52.28, 35.46, 34.86; <sup>19</sup>F NMR (376 MHz, Chloroform-*d*) δ -117.59, -119.70. HRMS (ESI-TOF) *m/z* calc'd for C<sub>29</sub>H<sub>25</sub>F<sub>2</sub>N<sub>2</sub>O<sub>6</sub>S [M+H]<sup>+</sup>: 567.1396; found: 567.1398.

SFC Chiralpak<sup>®</sup> OJ-3 column (25% isopropanol, 2.0 mL/min) *t*<sub>r</sub> = 3.27 min (minor), 3.54 min (major): 86:14 er.

The absolute stereochemistry was assigned by analogy to compounds **4m** and **4n**.

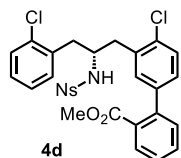

**Methyl (R)-4'-chloro-3'-(3-(2-chlorophenyl)-2-((4-nitrophenyl)sulfonamido)propyl)-[1,1'-biphenyl]-2-carboxylate (4d)**

Substrate **3d** was arylated following the general procedure by using methyl 2-iodobenzoate (44 μL, 0.3 mmol, 3.0 equiv.), (+)-NBE-CO<sub>2</sub>Me (7.5 mg, 50 μmol, 50 mol%), and TBME (0.5 mL). After purification by preparative TLC chromatography (hexane/Et<sub>2</sub>O/DCM = 4:4:3 v/v/v), compound **4d** (41.6 mg) was obtained in 69% yield as a colorless oil.

<sup>1</sup>H NMR (600 MHz, Chloroform-*d*) δ 8.00 (d, *J* = 8.8 Hz, 2H), 7.93 (dd, *J* = 7.8, 1.4 Hz, 1H), 7.64 (d, *J* = 8.8 Hz, 2H), 7.55 (td, *J* = 7.6, 1.4 Hz, 1H), 7.44 (t, *J* = 7.4 Hz, 1H), 7.29 (d, *J* = 7.6 Hz, 1H), 7.20 (d, *J* = 8.2 Hz, 1H), 7.18 (d, *J* = 2.2 Hz, 1H), 7.14 (dd, *J* = 7.2, 2.0 Hz, 1H), 7.11–7.05 (m, 4H), 5.04 (d, *J* = 7.9 Hz, 1H), 4.04–3.94 (m, 1H), 3.74 (s, 3H), 3.09–2.92 (m, 4H); <sup>13</sup>C NMR (150 MHz, Chloroform-*d*) δ 168.33, 149.56, 145.65, 141.53, 140.32, 135.25, 134.28, 134.15, 133.38, 132.46, 131.96, 131.94, 130.94, 130.57, 129.88, 129.76, 129.44, 128.55, 128.45, 127.96, 127.90, 127.00, 124.03, 54.83, 52.38, 39.71, 39.15. HRMS (ESI-TOF) *m/z* calc'd for C<sub>29</sub>H<sub>25</sub>ClN<sub>2</sub>O<sub>6</sub>S [M+H]<sup>+</sup>: 599.0805; found: 599.0809.

SFC Chiralpak<sup>®</sup> AD-3 column (30% isopropanol, 3.0 mL/min) *t*<sub>r</sub> = 3.34 min (minor), 5.65 min (major): 95:5 er.

The absolute stereochemistry was assigned by analogy to compounds **4m** and **4n**.

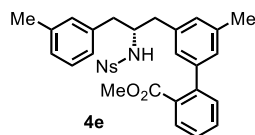

**Methyl (R)-3'-methyl-5'-(2-((4-nitrophenyl)sulfonamido)-3-(*m*-tolyl)propyl)-[1,1'-biphenyl]-2-carboxylate (4e)**

Substrate **3e** was arylated following the general procedure by using methyl 2-iodobenzoate (20.5 μL, 0.14 mmol, 1.4 equiv.), (+)-NBE-CO<sub>2</sub>Me (3.0 mg, 20 μmol, 20 mol%), and TBME (1.5 mL). After purification by preparative TLC chromatography (hexane/EtOAc = 3:1 v/v), compound **4e** (30.5 mg) was obtained in 55% yield as a white solid.

$^1\text{H}$  NMR (600 MHz, Chloroform-*d*)  $\delta$  8.03 (d,  $J$  = 8.8 Hz, 2H), 7.87 (dd,  $J$  = 7.8, 1.3 Hz, 1H), 7.61 (d,  $J$  = 8.8 Hz, 2H), 7.54 (td,  $J$  = 7.6, 1.4 Hz, 1H), 7.42 (td,  $J$  = 7.6, 1.2 Hz, 1H), 7.31 (dd,  $J$  = 7.7, 1.0 Hz, 1H), 7.06 (t,  $J$  = 7.5 Hz, 1H), 7.00 (s, 1H), 6.97 (d,  $J$  = 7.6 Hz, 1H), 6.88 (s, 1H), 6.85 (d,  $J$  = 7.6 Hz, 1H), 6.82 (s, 1H), 6.78 (s, 1H), 4.78 (d,  $J$  = 7.6 Hz, 1H), 3.72 (s, 3H), 3.64 (q,  $J$  = 6.7, 6.0 Hz, 1H), 2.92 (dd,  $J$  = 13.7, 5.8 Hz, 1H), 2.84 (dd,  $J$  = 13.8, 5.8 Hz, 1H), 2.76 (dd,  $J$  = 13.7, 6.7 Hz, 1H), 2.69 (dd,  $J$  = 13.8, 7.6 Hz, 1H), 2.26 (s, 3H), 2.22 (s, 3H);  $^{13}\text{C}$  NMR (150 MHz, Chloroform-*d*)  $\delta$  168.72, 149.50, 145.89, 142.64, 141.61, 138.32, 138.24, 137.23, 136.22, 131.66, 130.89, 130.28, 130.23, 129.13, 128.64, 128.04, 127.78, 127.60, 127.46, 127.42, 126.57, 123.92, 57.36, 52.27, 41.52, 41.31, 21.43, 21.40. HRMS (ESI-TOF)  $m/z$  calc'd for  $\text{C}_{31}\text{H}_{30}\text{NaN}_2\text{O}_6\text{S}$   $[\text{M}+\text{Na}]^+$ : 581.1717; found: 581.1725.

SFC Chiralpak<sup>®</sup> OD-3 column (30% isopropanol, 2.0 mL/min)  $t_r$  = 4.46 min (major), 5.78 min (minor): 88:12 er.

The absolute stereochemistry was assigned by analogy to compounds **4m** and **4n**.

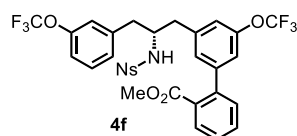

**Methyl (R)-3'-((4-nitrophenyl)sulfonamido)-3-(3-(trifluoromethoxy)phenyl)propyl-5'-(trifluoromethoxy)-[1,1'-biphenyl]-2-carboxylate (4f)**

Substrate **3f** was arylated following the general procedure by using methyl 2-iodobenzoate (44  $\mu\text{L}$ , 0.30 mmol, 3.0 equiv.), (+)-NBE-CO<sub>2</sub>Me (3.0 mg, 20  $\mu\text{mol}$ , 20 mol%), and TBME (0.5 mL). After purification by preparative TLC chromatography (hexane/Et<sub>2</sub>O = 1:2 v/v), compound **4f** (40.0 mg) was obtained in 57% yield as a colorless oil.

$^1\text{H}$  NMR (600 MHz, Chloroform-*d*)  $\delta$  8.08 (d,  $J$  = 8.8 Hz, 2H), 7.98 (dd,  $J$  = 7.8, 1.3 Hz, 1H), 7.66 (d,  $J$  = 8.9 Hz, 2H), 7.58 (td,  $J$  = 7.5, 1.4 Hz, 1H), 7.48 (td,  $J$  = 7.7, 1.3 Hz, 1H), 7.30 (dd,  $J$  = 7.6, 1.3 Hz, 1H), 7.19 (t,  $J$  = 7.9 Hz, 1H), 7.07 (d,  $J$  = 1.6 Hz, 1H), 7.05–7.00 (m, 2H), 6.99 (d,  $J$  = 7.8 Hz, 1H), 6.89 (s, 1H), 6.82 (s, 1H), 4.94 (d,  $J$  = 8.1 Hz, 1H), 3.76 (s, 3H), 3.73 (td,  $J$  = 8.1, 4.1 Hz, 1H), 3.02 (dd,  $J$  = 13.8, 5.5 Hz, 1H), 2.90 (dd,  $J$  = 13.9, 5.6 Hz, 1H), 2.80 (dd,  $J$  = 13.9, 6.6 Hz, 1H), 2.70 (dd,  $J$  = 13.9, 8.0 Hz, 1H);  $^{13}\text{C}$  NMR (150 MHz, Chloroform-*d*)  $\delta$  167.99, 149.81, 149.38, 149.11, 145.68, 143.63, 141.31, 139.45, 137.73, 132.14, 130.90, 130.80, 130.09, 129.70, 128.98, 128.29, 127.88, 127.82, 124.15, 122.05, 120.48 (q,  $J$  = 258.1 Hz), 120.25 (q,  $J$  = 256.0 Hz), 120.44, 119.74, 119.42, 56.76, 52.38, 41.33, 40.91;  $^{19}\text{F}$  NMR (376 MHz, CDCl<sub>3</sub>)  $\delta$  -58.07, -58.10. HRMS (ESI-TOF)  $m/z$  calc'd for  $\text{C}_{31}\text{H}_{25}\text{F}_6\text{N}_2\text{O}_8\text{S}$   $[\text{M}+\text{H}]^+$ : 699.1230; found: 699.1214.

SFC Chiralpak<sup>®</sup> AD-3 column (10% isopropanol, 2.0 mL/min)  $t_r$  = 4.84 min (minor), 6.02 min (major): 90:10 er.

The absolute stereochemistry was assigned by analogy to compounds **4m** and **4n**.

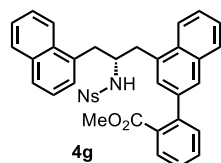

**Methyl (R)-4'-chloro-3'-(3-(2-chlorophenyl)-2-((4-nitrophenyl)sulfonamido)propyl)-[1,1'-biphenyl]-2-carboxylate (4g)**

Substrate **3g** was arylated following the general procedure by using methyl 2-iodobenzoate (44  $\mu\text{L}$ , 0.3 mmol, 3.0 equiv.), (+)-NBE-CO<sub>2</sub>Me (3.0 mg, 20  $\mu\text{mol}$ , 20 mol%), and TBME (0.5 mL). After purification by preparative TLC chromatography (toluene/DCM/Et<sub>2</sub>O = 2:1:1 v/v/v), compound **4g** (44.5 mg) was obtained in 71% yield as a yellow liquid.

$^1\text{H}$  NMR (600 MHz, Chloroform-*d*)  $\delta$  7.99 (dd,  $J$  = 7.8, 1.4 Hz, 1H), 7.77 (d,  $J$  = 8.3 Hz, 2H), 7.71 (d,  $J$  = 8.1 Hz, 1H), 7.68 (d,  $J$  = 8.2 Hz, 1H), 7.65 (d,  $J$  = 1.7 Hz, 1H), 7.60 (td,  $J$  = 7.5, 1.4 Hz, 1H), 7.51–7.41 (m, 5H), 7.36 (dd,  $J$  = 12.5, 8.4 Hz, 4H), 7.30 (dt,  $J$  = 7.5, 4.2 Hz, 2H), 7.25 (d,  $J$  = 1.8 Hz, 1H), 7.17 (d,  $J$  = 8.4 Hz,

1H), 7.08 (t,  $J = 7.6$  Hz, 1H), 4.99 (d,  $J = 5.1$  Hz, 1H), 3.90 (q,  $J = 7.1$  Hz, 1H), 3.75 (s, 3H), 3.66–3.57 (m, 1H), 3.32–3.24 (m, 2H), 3.16 (dd,  $J = 14.3, 8.6$  Hz, 1H);  $^{13}\text{C}$  NMR (150 MHz, Chloroform- $d$ )  $\delta$  168.49, 148.80, 143.77, 142.62, 138.57, 134.11, 134.04, 133.69, 132.12, 131.94, 131.67, 131.42, 130.68, 130.34, 130.06, 129.84, 128.99, 128.91, 128.20, 128.03, 127.79, 127.38, 126.85, 126.31, 126.29, 126.16, 126.03, 125.48, 123.79, 123.21, 54.50, 52.58, 40.32, 39.29. HRMS (ESI-TOF)  $m/z$  calc'd for  $\text{C}_{37}\text{H}_{30}\text{NaN}_2\text{O}_6\text{S}$   $[\text{M}+\text{Na}]^+$ : 653.1717; found: 653.1720.

SFC Chiralpak<sup>®</sup> AD-3 column (40% isopropanol, 2.0 mL/min)  $t_r = 5.37$  min (minor), 8.26 min (major): 98:2 er.

The absolute stereochemistry was assigned by analogy to compounds **4m** and **4n**.

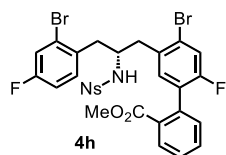

**Methyl (*R*)-4'-bromo-5'-(3-(2-bromo-4-fluorophenyl)-2-((4-nitrophenyl)sulfonamido)propyl)-2'-fluoro-[1,1'-biphenyl]-2-carboxylate (**4h**)**

Substrate **3h** was arylated following the general procedure by using methyl 2-iodobenzoate (44  $\mu\text{L}$ , 0.3 mmol, 3.0 equiv.), (+)-NBE-CO<sub>2</sub>Me (7.5 mg, 50  $\mu\text{mol}$ , 50 mol%), and TBME (0.5 mL). After purification by preparative TLC chromatography (toluene/EtOAc = 6:1 v/v), compound **4h** (43.5 mg) was obtained in 60% yield as a colorless oil.

$^1\text{H}$  NMR (600 MHz, Chloroform- $d$ )  $\delta$  8.10 (d,  $J = 8.8$  Hz, 2H), 8.02 (dd,  $J = 7.8, 1.4$  Hz, 1H), 7.68 (d,  $J = 8.8$  Hz, 2H), 7.59 (td,  $J = 7.6, 1.5$  Hz, 1H), 7.49 (td,  $J = 7.7, 1.3$  Hz, 1H), 7.28 (dd,  $J = 7.6, 1.3$  Hz, 1H), 7.16 (dd,  $J = 8.2, 2.0$  Hz, 2H), 7.10–7.04 (m, 2H), 6.83 (td,  $J = 8.2, 2.7$  Hz, 1H), 5.01 (d,  $J = 8.6$  Hz, 1H), 3.99 (dt,  $J = 8.5, 5.7$  Hz, 1H), 3.79 (s, 3H), 3.04 (ddd,  $J = 21.5, 14.0, 5.6$  Hz, 2H), 2.98–2.89 (m, 2H);  $^{13}\text{C}$  NMR (150 MHz, Chloroform- $d$ )  $\delta$  167.52, 161.42 (d,  $J = 251.0$  Hz), 158.19 (d,  $J = 250.9$  Hz), 149.69, 145.76, 135.41, 133.47 (d,  $J = 4.0$  Hz), 132.79 (d,  $J = 3.8$  Hz), 132.62 (d,  $J = 8.1$  Hz), 132.36, 132.79 (d,  $J = 3.5$  Hz), 131.46, 130.65, 130.23, 128.88 (d,  $J = 15.9$  Hz), 128.65, 128.06, 124.70 (d,  $J = 9.1$  Hz), 124.12, 123.59 (d,  $J = 9.4$  Hz), 120.21 (d,  $J = 24.2$  Hz), 119.89 (d,  $J = 25.8$  Hz), 114.80 (d,  $J = 20.7$  Hz), 55.05, 52.42, 41.34, 40.79;  $^{19}\text{F}$  NMR (376 MHz, Chloroform- $d$ )  $\delta$  -112.99, -115.98. HRMS (ESI-TOF)  $m/z$  calc'd for  $\text{C}_{29}\text{H}_{23}\text{Br}_2\text{F}_2\text{N}_2\text{O}_6\text{S}$   $[\text{M}+\text{H}]^+$ : 722.9606; found: 722.9599.

SFC Chiralpak<sup>®</sup> OJ-3 column (30% isopropanol, 2.0 mL/min)  $t_r = 3.96$  min (minor), 4.40 min (major): 92:8 er.

The absolute stereochemistry was assigned by analogy to compounds **4m** and **4n**.

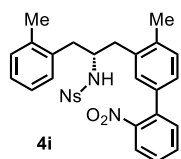

**(*R*)-*N*-(1-(4-methyl-2'-nitro-[1,1'-biphenyl]-3-yl)-3-(*o*-tolyl)propan-2-yl)-4-nitrobenzenesulfonamide (**4i**)**

Substrate **3a** was arylated following the general procedure by using 1-iodo-2-nitrobenzene (74.5 mg, 0.3 mmol, 3.0 equiv.), (+)-NBE-CO<sub>2</sub>Me (3.0 mg, 20  $\mu\text{mol}$ , 20 mol%), and TBME (1 mL). After purification by preparative TLC chromatography (hexane/EtOAc = 2:1 v/v), compound **4i** (35.5 mg) was obtained in 65% yield as a white solid.

$^1\text{H}$  NMR (600 MHz, Chloroform- $d$ )  $\delta$  7.99 (d,  $J = 8.9$  Hz, 2H), 7.83 (d,  $J = 8.0$  Hz, 1H), 7.61 (t,  $J = 7.4$  Hz, 1H), 7.54 (d,  $J = 8.9$  Hz, 2H), 7.48 (t,  $J = 7.7$  Hz, 1H), 7.39 (d,  $J = 7.6$  Hz, 1H), 7.11 (d,  $J = 1.1$  Hz, 2H), 7.07 (s, 1H), 7.03 (t,  $J = 7.3$  Hz, 1H), 6.96 (t,  $J = 7.3$  Hz, 1H), 6.92 (d,  $J = 7.5$  Hz, 1H), 6.89 (d,  $J = 7.4$  Hz, 1H), 4.82 (d,  $J = 7.4$  Hz, 1H), 3.55 (h,  $J = 7.2$  Hz, 1H), 3.06 (dd,  $J = 13.8, 6.4$  Hz, 1H), 2.94–2.82 (m, 2H), 2.68 (dd,  $J = 14.1, 9.1$  Hz, 1H), 2.22 (s, 3H), 1.99 (s, 3H);  $^{13}\text{C}$  NMR (150 MHz, Chloroform- $d$ )  $\delta$  149.55, 149.41, 145.33, 136.69, 136.25, 136.05, 135.79, 135.41, 135.32, 132.48, 131.87, 131.29, 130.79, 130.47, 130.20,

128.33, 127.78, 127.19, 126.69, 126.20, 124.22, 124.04, 55.34, 40.38, 38.76, 19.29, 19.11. HRMS (ESI-TOF)  $m/z$  calc'd for  $C_{29}H_{28}N_3O_6S$   $[M+H]^+$ : 546.1693; found: 546.1694.

SFC Chiralpak<sup>®</sup> OJ-3 column (10% isopropanol, 2.0 mL/min)  $t_r$  = 23.64 min (minor), 24.81 min (major): 99:1 er.

The absolute stereochemistry was assigned by analogy to compounds **4m** and **4n**.

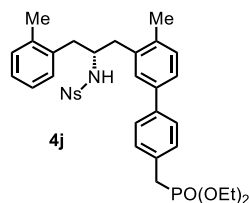

**(R)-N-(1-(4'-(2-chloroethoxy)-4-methyl-[1,1'-biphenyl]-3-yl)-3-(*o*-tolyl)propan-2-yl)-4-nitrobenzenesulfonamide (**4j**)**

Substrate **3a** was arylated following the general procedure by using  $Pd(OAc)_2$  (3.3 mg, 15  $\mu$ mol, 15 mol%), 4-acetylpyridine as ligand (3.3  $\mu$ L, 30  $\mu$ mol, 30 mol%), diethyl (4-iodobenzyl)phosphonate (106 mg, 0.3 mmol, 3.0 equiv.), (+)-NBE-CO<sub>2</sub>Me (7.5 mg, 50  $\mu$ mol, 50 mol%), and TBME (0.3 mL). After purification by preparative TLC chromatography (hexane/EtOAc = 1:6 v/v), compound **4j** (39.0 mg) was obtained in 60% yield as a yellow solid.

<sup>1</sup>H NMR (600 MHz, Chloroform-*d*)  $\delta$  7.85 (d,  $J$  = 8.8 Hz, 2H), 7.45 (d,  $J$  = 8.8 Hz, 2H), 7.41 (d,  $J$  = 7.9 Hz, 2H), 7.35 (dd,  $J$  = 8.3, 2.5 Hz, 2H), 7.22 (dd,  $J$  = 7.9, 2.0 Hz, 1H), 7.17 (d,  $J$  = 2.0 Hz, 1H), 7.11–6.98 (m, 4H), 6.96 (d,  $J$  = 7.9 Hz, 1H), 5.57 (d,  $J$  = 8.1 Hz, 1H), 4.14–3.98 (m, 4H), 3.61 (q,  $J$  = 7.3 Hz, 1H), 3.21 (s, 1H), 3.18 (s, 1H), 2.95 (dd,  $J$  = 13.7, 7.2 Hz, 1H), 2.91–2.74 (m, 3H), 2.15 (s, 3H), 2.05 (s, 3H), 1.34–1.17 (m, 6H); <sup>13</sup>C NMR (150 MHz, CDCl<sub>3</sub>)  $\delta$  149.25, 145.88, 138.96 (d,  $J$  = 3.8 Hz), 138.24 (d,  $J$  = 1.4 Hz), 136.35, 136.28, 135.72, 135.34, 131.16, 130.79, 130.74 (d,  $J$  = 11.4 Hz), 130.73, 130.38 (d,  $J$  = 6.2 Hz), 129.08, 127.36, 127.15, 126.85, 126.83, 126.14, 125.33, 123.82, 62.40 (dd,  $J$  = 6.8, 1.6 Hz), 55.56, 40.24, 39.47, 33.41 (d,  $J$  = 138.3 Hz), 19.38, 18.80, 16.55 (d,  $J$  = 6.0 Hz). HRMS (ESI-TOF)  $m/z$  calc'd for  $C_{34}H_{40}N_2O_7PS$   $[M+H]^+$ : 651.2288; found: 651.2285.

SFC Chiralpak<sup>®</sup> OJ-3 column (20% isopropanol, 2.0 mL/min)  $t_r$  = 6.51 min (major), 8.58 min (minor): 96:4 er. The absolute stereochemistry was assigned by analogy to compounds **4m** and **4n**.

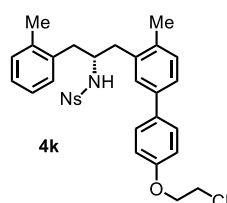

**(R)-N-(1-(4'-(2-chloroethoxy)-4-methyl-[1,1'-biphenyl]-3-yl)-3-(*o*-tolyl)propan-2-yl)-4-nitrobenzenesulfonamide (**4k**)**

Substrate **3a** was arylated following the general procedure by using  $Pd(OAc)_2$  (3.3 mg, 15  $\mu$ mol, 15 mol%), 4-acetylpyridine as ligand (3.3  $\mu$ L, 30  $\mu$ mol, 30 mol%), 1-(2-chloroethoxy)-4-iodobenzene (85 mg, 0.3 mmol, 3.0 equiv.), (+)-NBE-CO<sub>2</sub>Me (7.5 mg, 50  $\mu$ mol, 50 mol%), and TBME (0.5 mL). After purification by preparative TLC chromatography (hexane/EtOAc = 4:1 v/v), compound **4k** (33.6 mg) was obtained in 58% yield as a yellow solid.

<sup>1</sup>H NMR (600 MHz, Chloroform-*d*)  $\delta$  7.88 (d,  $J$  = 8.8 Hz, 2H), 7.45 (d,  $J$  = 8.8 Hz, 2H), 7.41 (d,  $J$  = 8.9 Hz, 2H), 7.22 (dd,  $J$  = 7.8, 2.0 Hz, 1H), 7.15–7.08 (m, 2H), 7.08–7.01 (m, 3H), 6.95 (dd,  $J$  = 15.1, 8.4 Hz, 3H), 4.96 (d,  $J$  = 8.0 Hz, 1H), 4.26 (t,  $J$  = 5.8 Hz, 2H), 3.84 (t,  $J$  = 5.9 Hz, 2H), 3.62 (td,  $J$  = 7.9, 5.7 Hz, 1H), 2.99 (dd,  $J$  = 13.8, 7.0 Hz, 1H), 2.95–2.86 (m, 2H), 2.80 (dd,  $J$  = 14.1, 8.5 Hz, 1H), 2.18 (s, 3H), 2.04 (s, 3H); <sup>13</sup>C NMR (150 MHz, Chloroform-*d*)  $\delta$  157.88, 149.37, 145.43, 138.24, 136.36, 136.00, 135.51, 134.75, 133.45, 131.25, 130.86, 130.69, 128.61, 127.79, 127.41, 127.26, 126.23, 125.12, 123.90, 115.23, 68.25, 55.61, 42.02,

40.33, 39.48, 19.43, 18.78. HRMS (ESI-TOF)  $m/z$  calc'd for  $C_{31}H_{30}ClN_2O_5S$   $[M-H]^-$ : 577.1569; found: 577.1561.

SFC Chiralpak<sup>®</sup> OJ-3 column (40% isopropanol, 2.5 mL/min)  $t_r$  = 6.01 min (minor), 7.36 min (major): 91:9 er. The absolute stereochemistry was assigned by analogy to compounds **4m** and **4n**.

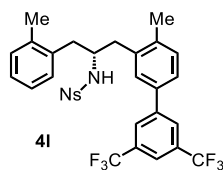

**(R)-N-(1-(4-methyl-3',5'-bis(trifluoromethyl)-[1,1'-biphenyl]-3-yl)-3-(*o*-tolyl)propan-2-yl)-4-nitrobenzenesulfonamide (**4l**)**

Substrate **3a** was arylated following the general procedure by using 1-iodo-3,5-bis(trifluoromethyl)benzene (53  $\mu$ L, 0.3 mmol, 3.0 equiv.), (+)-NBE-CO<sub>2</sub>Me (7.5 mg, 50  $\mu$ mol, 50 mol%), and TBME (0.5 mL). After purification by preparative TLC chromatography (hexane/EtOAc = 4:1 v/v), compound **4l** (40.0 mg) was obtained in 63% yield as a white solid.

<sup>1</sup>H NMR (600 MHz, Chloroform-*d*)  $\delta$  7.96–7.89 (m, 4H), 7.84 (s, 1H), 7.49 (d,  $J$  = 8.8 Hz, 2H), 7.36 (dd,  $J$  = 7.8, 2.1 Hz, 1H), 7.27 (d,  $J$  = 2.1 Hz, 1H), 7.19 (d,  $J$  = 7.9 Hz, 1H), 7.07 (td,  $J$  = 7.4, 1.5 Hz, 1H), 7.00 (t,  $J$  = 7.7 Hz, 1H), 6.96–6.92 (m, 2H), 4.75 (d,  $J$  = 8.1 Hz, 1H), 3.69 (td,  $J$  = 7.8, 5.8 Hz, 1H), 3.06 (dd,  $J$  = 13.9, 7.3 Hz, 1H), 2.97 (dd,  $J$  = 13.9, 6.9 Hz, 1H), 2.90 (dd,  $J$  = 14.0, 5.8 Hz, 1H), 2.77 (dd,  $J$  = 14.0, 8.6 Hz, 1H), 2.26 (s, 3H), 2.05 (s, 3H); <sup>13</sup>C NMR (150 MHz, Chloroform-*d*)  $\delta$  149.51, 145.65, 142.60, 137.54, 136.87, 136.14, 135.97, 135.23, 132.34 (q,  $J$  = 33.2 Hz), 131.83, 130.93, 130.53, 129.35, 127.50, 127.40, 126.88, 126.35, 125.83, 123.48 (q,  $J$  = 272.9 Hz), 123.97, 121.03 (hept,  $J$  = 3.7 Hz), 55.49, 40.50, 39.52, 19.23; <sup>19</sup>F NMR (376 MHz, Chloroform-*d*)  $\delta$  -63.08. HRMS (ESI-TOF)  $m/z$  calc'd for  $C_{31}H_{25}F_6N_2O_4S$   $[M-H]^-$ : 635.1445; found: 635.1439.

SFC Chiralpak<sup>®</sup> OD-3 column (20% isopropanol, 2.0 mL/min)  $t_r$  = 3.17 min (minor), 4.38 min (major): 95:5 er.

The absolute stereochemistry was assigned by analogy to compounds **4m** and **4n**.

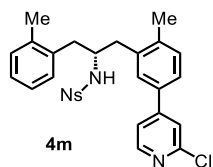

**(R)-N-(1-(5-(2-chloropyridin-4-yl)-2-methylphenyl)-3-(*o*-tolyl)propan-2-yl)-4-nitrobenzenesulfonamide (**4m**)**

Substrate **3a** was arylated following the general procedure by using Pd(OAc)<sub>2</sub> (3.3 mg, 15  $\mu$ mol, 15 mol%), 4-acetylpyridine as ligand (3.3  $\mu$ L, 30  $\mu$ mol, 30 mol%), 2-chloro-4-iodopyridine (50 mg, 0.3 mmol, 3.0 equiv.), (+)-NBE-CO<sub>2</sub>Me (7.5 mg, 50  $\mu$ mol, 50 mol%), and TBME (0.5 mL). After purification by preparative TLC chromatography (hexane/EtOAc = 2:1 v/v), compound **4m** (24.1 mg) was obtained in 45% yield as a white solid.

<sup>1</sup>H NMR (600 MHz, Chloroform-*d*)  $\delta$  8.40 (d,  $J$  = 5.1 Hz, 1H), 7.92 (d,  $J$  = 8.8 Hz, 2H), 7.49 (d,  $J$  = 8.9 Hz, 2H), 7.45 (d,  $J$  = 1.2 Hz, 1H), 7.38–7.32 (m, 2H), 7.28 (d,  $J$  = 2.0 Hz, 1H), 7.14 (d,  $J$  = 7.8 Hz, 1H), 7.07 (t,  $J$  = 7.4 Hz, 1H), 7.01 (t,  $J$  = 7.3 Hz, 1H), 6.97 (t,  $J$  = 7.1 Hz, 2H), 5.13 (d,  $J$  = 8.2 Hz, 1H), 3.67 (h,  $J$  = 7.4 Hz, 1H), 3.03–2.92 (m, 2H), 2.89 (dd,  $J$  = 13.9, 6.2 Hz, 1H), 2.83 (dd,  $J$  = 13.9, 8.2 Hz, 1H), 2.21 (s, 3H), 2.08 (s, 3H); <sup>13</sup>C NMR (150 MHz, Chloroform-*d*)  $\delta$  152.22, 150.71, 150.08, 149.29, 145.56, 138.36, 136.74, 136.00, 135.13, 134.26, 131.59, 130.73, 130.40, 129.09, 127.27, 127.19, 126.15, 125.39, 123.80, 121.49, 119.98, 55.36, 40.02, 39.56, 19.13, 19.07. HRMS (ESI-TOF)  $m/z$  calc'd for  $C_{28}H_{27}ClN_3O_4S$   $[M+H]^+$ : 536.1405; found: 536.1408.

SFC Chiralpak® OJ-3 column (30% isopropanol, 2.0 mL/min)  $t_r$  = 4.68 min (major), 10.34 min (minor): 92:8 er.

The absolute stereochemistry was determined by X-ray crystallography.

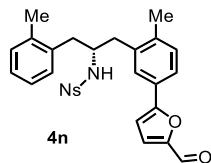

**(R)-N-(1-(5-(5-formylfuran-2-yl)-2-methylphenyl)-3-(*o*-tolyl)propan-2-yl)-4-nitrobenzenesulfonamide (4n)**

Substrate **3a** was arylated following the general procedure by using Pd(OAc)<sub>2</sub> (3.3 mg, 15 μmol, 15 mol%), 4-acetylpyridine as ligand (3.3 μL, 30 μmol, 30 mol%), 5-iodofuran-2-carbaldehyde (66.6 mg, 0.3 mmol, 3.0 equiv.), (+)-NBE-CO<sub>2</sub>Me (7.5 mg, 50 μmol, 50 mol%), and TBME (0.3 mL). After purification by preparative TLC chromatography (hexane/EtOAc = 2:1 v/v), compound **4n** (27.4 mg) was obtained in 53% yield as a white solid.

<sup>1</sup>H NMR (600 MHz, Chloroform-*d*) δ 9.62 (s, 1H), 7.84 (d, *J* = 8.8 Hz, 2H), 7.48 (d, *J* = 8.8 Hz, 2H), 7.41 (d, *J* = 1.9 Hz, 1H), 7.37 (dd, *J* = 7.9, 1.9 Hz, 1H), 7.30 (d, *J* = 3.7 Hz, 1H), 7.13–7.09 (m, 1H), 7.08–7.05 (m, 2H), 7.04 (d, *J* = 7.7 Hz, 2H), 6.70 (d, *J* = 3.7 Hz, 1H), 5.25 (d, *J* = 8.5 Hz, 1H), 3.73–3.65 (m, 1H), 2.99 (dd, *J* = 13.7, 7.0 Hz, 1H), 2.89 (dd, *J* = 13.8, 6.4 Hz, 2H), 2.77 (dd, *J* = 14.1, 8.9 Hz, 1H), 2.19 (s, 3H), 2.08 (s, 3H); <sup>13</sup>C NMR (150 MHz, Chloroform-*d*) δ 177.20, 159.16, 151.82, 149.23, 146.14, 138.44, 136.95, 136.40, 135.47, 131.23, 130.88, 130.74, 127.34, 127.32, 127.28, 126.68, 126.26, 123.92, 123.83, 107.43, 55.83, 40.64, 39.10, 19.45, 19.14. HRMS (ESI-TOF) *m/z* calc'd for C<sub>28</sub>H<sub>27</sub>N<sub>2</sub>O<sub>6</sub>S [M+H]<sup>+</sup>: 519.1584; found: 519.1590.

SFC Chiralpak® OD-3 column (30% isopropanol, 3.0 mL/min)  $t_r$  = 3.74 min (minor), 4.41 min (major): 96:4 er.

The absolute stereochemistry was determined by X-ray crystallography.

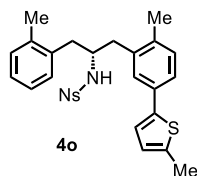

**(R)-N-(1-(2-methyl-5-(5-methylthiophen-2-yl)phenyl)-3-(*o*-tolyl)propan-2-yl)-4-nitrobenzenesulfonamide (4o)**

Substrate **3a** was arylated following the general procedure by using Pd(OAc)<sub>2</sub> (3.3 mg, 15 μmol, 15 mol%), 4-acetylpyridine as ligand (3.3 μL, 30 μmol, 30 mol%), 2-iodo-5-methylthiophene (67.2 mg, 0.3 mmol, 3.0 equiv.), (+)-NBE-CO<sub>2</sub>Me (7.5 mg, 50 μmol, 50 mol%), and TBME (0.3 mL). After purification by preparative TLC chromatography (hexane/EtOAc = 2:1 v/v), compound **4o** (22.5 mg) was obtained in 43% yield as a yellow solid.

<sup>1</sup>H NMR (600 MHz, Chloroform-*d*) δ 7.88 (d, *J* = 8.8 Hz, 2H), 7.46 (d, *J* = 8.8 Hz, 2H), 7.17 (dd, *J* = 7.8, 2.0 Hz, 1H), 7.12 (td, *J* = 7.1, 2.1 Hz, 1H), 7.10 – 7.04 (m, 3H), 7.00 (d, *J* = 2.0 Hz, 1H), 6.96 (d, *J* = 3.5 Hz, 1H), 6.89 (d, *J* = 7.9 Hz, 1H), 6.72 – 6.66 (m, 1H), 4.66 (d, *J* = 7.9 Hz, 1H), 3.65 – 3.55 (m, 1H), 3.03 (dd, *J* = 13.8, 6.7 Hz, 1H), 2.91 (dd, *J* = 13.8, 7.4 Hz, 1H), 2.86 (dd, *J* = 14.1, 5.3 Hz, 1H), 2.68 (dd, *J* = 14.1, 8.9 Hz, 1H), 2.50 (s, 3H), 2.21 (s, 3H), 2.00 (d, *J* = 2.1 Hz, 3H); <sup>13</sup>C NMR (150 MHz, Chloroform-*d*) δ 149.40, 145.42, 141.19, 139.57, 136.47, 136.09, 135.44, 134.90, 132.63, 131.22, 130.93, 130.73, 127.41, 127.33, 127.26, 126.44, 126.26, 123.98, 123.84, 122.63, 55.79, 40.60, 39.04, 19.51, 18.85, 15.60. HRMS (ESI-TOF) *m/z* calc'd for C<sub>28</sub>H<sub>29</sub>N<sub>2</sub>O<sub>4</sub>S<sub>2</sub> [M+H]<sup>+</sup>: 521.1563; found: 521.1572.

SFC Chiralpak® IC column (30% isopropanol, 2.0 mL/min)  $t_r$  = 5.08 min (major), 5.82 min (minor): 88:12 er.

The absolute stereochemistry was assigned by analogy to compounds **4m** and **4n**.

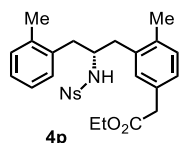

#### Ethyl (*R*)-2-(4-methyl-3-(2-((4-nitrophenyl)sulfonamido)-3-(*o*-tolyl)propyl)phenyl)acetate (**4p**)

Substrate **3a** was alkylated following the general procedure by using Pd(OAc)<sub>2</sub> (3.3 mg, 15 μmol, 15 mol%), 4-acetylpyridine as ligand (3.3 μL, 30 μmol, 30 mol%), ethyl 2-iodoacetate (35 μL, 0.3 mmol, 3.0 equiv.), (+)-NBE-CO<sub>2</sub>Me (7.5 mg, 50 μmol, 50 mol%), and DCM (1 mL). After purification by preparative TLC chromatography (hexane/EtOAc = 2:1 v/v), compound **4p** (24.5 mg) was obtained in 48% yield as a colorless oil.

<sup>1</sup>H NMR (600 MHz, Chloroform-*d*) δ 7.96 (d, *J* = 8.9 Hz, 2H), 7.50 (d, *J* = 8.9 Hz, 2H), 7.08 (td, *J* = 7.4, 1.7 Hz, 1H), 7.04–6.95 (m, 4H), 6.93 (d, *J* = 1.9 Hz, 1H), 6.85 (d, *J* = 7.7 Hz, 1H), 4.89 (d, *J* = 7.5 Hz, 1H), 4.16 (q, *J* = 7.1 Hz, 2H), 3.55–3.41 (m, 3H), 2.91 (dd, *J* = 13.9, 7.3 Hz, 1H), 2.87–2.80 (m, 2H), 2.77 (dd, *J* = 13.9, 8.2 Hz, 1H), 2.10 (s, 3H), 1.96 (s, 3H), 1.26 (t, *J* = 7.1 Hz, 3H); <sup>13</sup>C NMR (150 MHz, CDCl<sub>3</sub>) δ 171.80, 149.44, 145.26, 136.30, 135.74, 135.54, 134.94, 131.98, 131.63, 130.96, 130.81, 130.61, 128.08, 127.70, 127.18, 126.17, 123.95, 61.12, 55.19, 40.79, 39.86, 39.52, 19.29, 18.76, 14.35. HRMS (ESI-TOF) *m/z* calc'd for C<sub>27</sub>H<sub>31</sub>N<sub>2</sub>O<sub>6</sub>S [M+H]<sup>+</sup>: 511.1897; found: 511.1899.

SFC Chiralpak<sup>®</sup> OJ-3 column (20% isopropanol, 2.0 mL/min) *t*<sub>r</sub> = 3.87 min (minor), 4.18 min (major): 92:8 er. The absolute stereochemistry was assigned by analogy to compounds **4m** and **4n**.

#### D. Pd/(+)-NBE-CO<sub>2</sub>Me Catalyzed Kinetic Resolution of Homobenzylamines

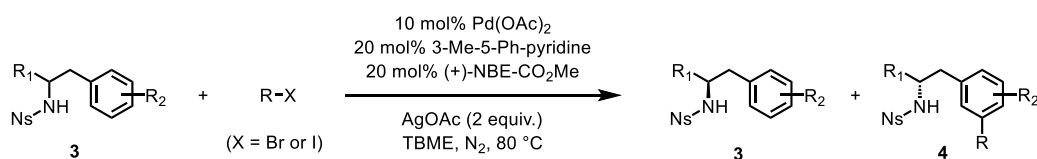

**General procedure:** Arene **3** (0.10 mmol, 1.0 equiv), Pd(OAc)<sub>2</sub> (2.2 mg, 10 μmol, 10 mol%), 3-methyl-5-phenylpyridine (3.4 mg, 20 μmol, 20 mol%), coupling partner, and AgOAc (33 mg, 0.20 mmol, 2.0 equiv.) were added into a 2-dram reaction vial. TBME (1 mL) and (+)-NBE-CO<sub>2</sub>Me (3.0 mg, 20 μmol, 20 mol%) were added to the mixture. The vial was flushed with N<sub>2</sub> and then capped. The reaction mixture was then stirred at 80 °C for 24 hours. After cooling to room temperature, the mixture was filtered through Celite and eluted with EtOAc (3 × 2 mL). The filtrate was evaporated under reduced pressure. Purification by preparative TLC chromatography afforded product **4**.

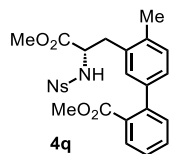

#### Methyl (*S*)-3'-(3-methoxy-2-((4-nitrophenyl)sulfonamido)-3-oxopropyl)-4'-methyl-[1,1'-biphenyl]-2-carboxylate (**4q**)

Substrate **3i** was arylated following the general procedure by using methyl 2-bromobenzoate (7.1 μL, 0.05 mmol, 0.5 equiv.) and TBME (1 mL). After purification by preparative TLC chromatography (hexane/EtOAc = 2:1 v/v), compound **4q** (24.4 mg) was obtained in 47% yield as a colorless oil.

<sup>1</sup>H NMR (600 MHz, Chloroform-*d*) δ 8.17 (d, *J* = 8.8 Hz, 2H), 7.92–7.79 (m, 3H), 7.52 (td, *J* = 7.5, 1.4 Hz, 1H), 7.41 (td, *J* = 7.6, 1.3 Hz, 1H), 7.28–7.23 (m, 1H), 7.09 (dd, *J* = 7.7, 1.9 Hz, 1H), 7.06 (d, *J* = 7.8 Hz, 1H), 6.98 (d, *J* = 1.8 Hz, 1H), 5.60 (br s, 1H), 4.23 (dd, *J* = 8.4, 5.5 Hz, 1H), 3.76 (s, 3H), 3.62 (s, 3H), 3.17 (dd, *J* = 14.3, 5.5 Hz, 1H), 2.97 (dd, *J* = 14.2, 8.4 Hz, 1H), 2.20 (s, 3H); <sup>13</sup>C NMR (150 MHz, Chloroform-*d*) δ 171.68, 168.76, 149.98, 145.69, 142.25, 139.28, 135.58, 132.81, 131.68, 130.90, 130.67, 130.65, 130.25, 130.21, 128.42, 127.73, 127.44, 124.19, 56.12, 52.89, 52.41, 36.58, 19.08. HRMS (ESI-TOF) *m/z* calc'd for C<sub>25</sub>H<sub>25</sub>N<sub>2</sub>O<sub>8</sub>S [M+H]<sup>+</sup>: 513.1326; found: 513.1331.



SFC Chiralpak<sup>®</sup> AD-3 column (30% isopropanol, 2.0 mL/min)  $t_r$  = 4.31 min (minor), 6.64 min (major): 88:12 er.

The absolute stereochemistry was assigned by analogy to compounds **4m** and **4n**.

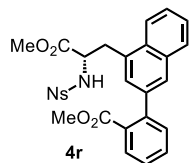

**Methyl (S)-2-(4-(3-methoxy-2-((4-nitrophenyl)sulfonamido)-3-oxopropyl)naphthalen-2-yl)benzoate (4r)**

Substrate **3j** was arylated following the general procedure by using methyl 2-bromobenzoate (7.1  $\mu$ L, 0.05 mmol, 0.5 equiv.) and TBME (1 mL). After purification by preparative TLC chromatography (toluene/EtOAc = 5:1 v/v), compound **4r** (25.8 mg) was obtained in 47% yield as a white solid.

<sup>1</sup>H NMR (600 MHz, Chloroform-*d*)  $\delta$  8.06 (dd,  $J$  = 7.9, 1.4 Hz, 1H), 7.75–7.69 (m, 3H), 7.69–7.65 (m, 2H), 7.62 (td,  $J$  = 7.5, 1.4 Hz, 1H), 7.53 (d,  $J$  = 8.8 Hz, 2H), 7.50 (td,  $J$  = 7.7, 1.3 Hz, 1H), 7.43 (dd,  $J$  = 7.6, 1.2 Hz, 1H), 7.39–7.33 (m, 2H), 7.23 (d,  $J$  = 1.7 Hz, 1H), 5.53 (d,  $J$  = 6.5 Hz, 1H), 4.21 (ddd,  $J$  = 10.8, 6.4, 4.4 Hz, 1H), 3.88 (s, 3H), 3.78 (s, 3H), 3.71 (dd,  $J$  = 14.3, 4.4 Hz, 1H), 3.12 (dd,  $J$  = 14.4, 10.7 Hz, 1H); <sup>13</sup>C NMR (150 MHz, Chloroform-*d*)  $\delta$  171.84, 168.24, 149.35, 144.20, 142.75, 138.73, 134.04, 132.36, 131.47, 130.94, 130.56, 130.06, 129.41, 129.34, 129.20, 127.96, 127.93, 127.26, 126.71, 126.32, 123.56, 122.68, 56.01, 53.07, 52.83, 35.93. HRMS (ESI-TOF)  $m/z$  calc'd for C<sub>28</sub>H<sub>25</sub>N<sub>2</sub>O<sub>8</sub>S [M+H]<sup>+</sup>: 549.1326; found: 549.1328.

SFC Chiralpak<sup>®</sup> IC column (40% isopropanol, 2.0 mL/min)  $t_r$  = 5.86 min (major), 8.90 min (minor): 93:7 er.

The absolute stereochemistry was assigned by analogy to compounds **4m** and **4n**.

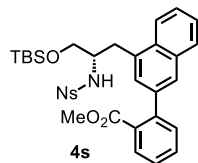

**Methyl (S)-2-(4-(3-((tert-butyldimethylsilyloxy)-2-((4-nitrophenyl)sulfonamido)propyl)naphthalen-2-yl)benzoate (4s)**

Substrate **3m** was arylated following the general procedure by using methyl 2-bromobenzoate (7.1  $\mu$ L, 0.05 mmol, 0.5 equiv.) and TBME (1 mL). After purification by preparative TLC chromatography (hexane/EtOAc = 4:1 v/v), compound **4s** (29.8 mg) was obtained in 47% yield as a colorless oil.

<sup>1</sup>H NMR (600 MHz, Chloroform-*d*)  $\delta$  8.02 (dd,  $J$  = 7.8, 1.4 Hz, 1H), 7.67–7.59 (m, 6H), 7.52–7.46 (m, 3H), 7.44 (d,  $J$  = 7.7 Hz, 1H), 7.34–7.27 (m, 2H), 7.17 (d,  $J$  = 1.7 Hz, 1H), 4.91 (d,  $J$  = 5.1 Hz, 1H), 4.08 (dd,  $J$  = 9.8, 3.2 Hz, 1H), 3.87 (s, 3H), 3.80–3.65 (m, 2H), 3.58–3.43 (m, 1H), 2.75 (dd,  $J$  = 14.5, 10.9 Hz, 1H), 0.98 (s, 9H), 0.16 (d,  $J$  = 8.3 Hz, 6H); <sup>13</sup>C NMR (150 MHz, Chloroform-*d*)  $\delta$  168.36, 149.05, 144.19, 142.69, 138.57, 134.08, 132.25, 131.74, 131.50, 130.78, 130.32, 130.17, 129.60, 129.00, 127.85, 127.79, 126.76, 126.32, 126.16, 123.41, 123.22, 66.62, 55.40, 52.72, 35.83, 26.08, 18.45, -5.12, -5.16. HRMS (ESI-TOF)  $m/z$  calc'd for C<sub>33</sub>H<sub>39</sub>N<sub>2</sub>O<sub>7</sub>SSi [M+H]<sup>+</sup>: 635.2242; found: 635.2242.

SFC Chiralpak<sup>®</sup> IC column (30% isopropanol, 2.0 mL/min)  $t_r$  = 3.05 min (major), 3.96 min (minor): 92:8 er.

The absolute stereochemistry was assigned by analogy to compounds **4m** and **4n**.

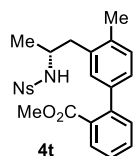

**Methyl (R)-4'-methyl-3'-(2-((4-nitrophenyl)sulfonamido)propyl)-[1,1'-biphenyl]-2-carboxylate (4t)**

Substrate **3k** was arylated following the general procedure by using methyl 2-bromobenzoate (21.1  $\mu$ L, 0.15 mmol, 1.5 equiv.) and TBME (1 mL) at 80 °C for 48 hours. After purification by preparative TLC chromatography (hexane/EtOAc = 4:1 v/v), compound **4t** (17.8 mg) was obtained in 38% yield as a colorless

oil.

$^1\text{H}$  NMR (600 MHz, Chloroform-*d*)  $\delta$  8.15 (d,  $J$  = 8.4 Hz, 2H), 7.89 (d,  $J$  = 7.8 Hz, 1H), 7.82 (d,  $J$  = 8.4 Hz, 2H), 7.54 (t,  $J$  = 7.7 Hz, 1H), 7.42 (t,  $J$  = 7.7 Hz, 1H), 7.28 (d,  $J$  = 7.7 Hz, 1H), 7.10 (d,  $J$  = 7.7 Hz, 1H), 6.98 (d,  $J$  = 7.8 Hz, 1H), 6.95 (s, 1H), 4.82 (d,  $J$  = 6.4 Hz, 1H), 3.78 (s, 3H), 3.52 (p,  $J$  = 6.6 Hz, 1H), 2.82 (dd,  $J$  = 14.1, 5.6 Hz, 1H), 2.65 (dd,  $J$  = 14.2, 8.8 Hz, 1H), 2.06 (s, 3H), 1.31 (d,  $J$  = 6.4 Hz, 3H);  $^{13}\text{C}$  NMR (150 MHz, Chloroform-*d*)  $\delta$  168.69, 149.78, 146.24, 142.41, 139.20, 135.38, 134.53, 131.78, 131.01, 130.98, 130.73, 130.35, 130.07, 128.40, 127.47, 127.27, 124.20, 52.48, 50.24, 41.20, 22.85, 19.06. HRMS (ESI-TOF)  $m/z$  calc'd for  $\text{C}_{24}\text{H}_{25}\text{N}_2\text{O}_6\text{S}$   $[\text{M}+\text{H}]^+$ : 469.1428; found: 469.1426.

SFC Chiralpak<sup>®</sup> IC column (30% isopropanol, 2.0 mL/min)  $t_r$  = 5.09 min (minor), 6.50 min (major): 93:7 er.

The absolute stereochemistry was assigned by analogy to compounds **4m** and **4n**.

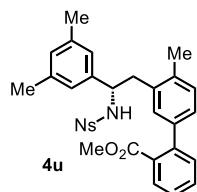

#### Methyl (*S*)-3'-((2-(3,5-dimethylphenyl)-2-((4-nitrophenyl)sulfonamido)ethyl)-4'-methyl-[1,1'-biphenyl]-2-carboxylate (**4u**)

Substrate **3n** was arylated following the general procedure by using methyl 2-bromobenzoate (14.1  $\mu\text{L}$ , 0.10 mmol, 1.0 equiv.) and TBME (1 mL). After purification by preparative TLC chromatography (hexane/EtOAc = 2:1 v/v), compound **4u** (27.4 mg) was obtained in 49% yield as a colorless oil.

$^1\text{H}$  NMR (600 MHz, Chloroform-*d*)  $\delta$  8.00 (d,  $J$  = 8.8 Hz, 2H), 7.91 (dd,  $J$  = 7.8, 1.4 Hz, 1H), 7.65 (d,  $J$  = 8.8 Hz, 1H), 7.53 (td,  $J$  = 7.6, 1.5 Hz, 1H), 7.42 (td,  $J$  = 7.6, 1.3 Hz, 1H), 7.24 (dd,  $J$  = 7.7, 1.3 Hz, 1H), 7.09 (dd,  $J$  = 7.7, 2.0 Hz, 1H), 7.07–6.98 (m, 2H), 6.79 (s, 1H), 6.64 (d,  $J$  = 1.4 Hz, 2H), 5.48 (d,  $J$  = 6.2 Hz, 1H), 4.57–4.46 (m, 1H), 3.81 (s, 2H), 3.08 (dd,  $J$  = 14.2, 5.2 Hz, 1H), 2.91 (dd,  $J$  = 14.3, 8.9 Hz, 1H), 2.16 (s, 6H), 2.02 (s, 3H);  $^{13}\text{C}$  NMR (150 MHz, Chloroform-*d*)  $\delta$  168.81, 149.53, 146.17, 142.57, 140.24, 139.13, 138.12, 135.83, 133.89, 131.75, 131.08, 131.00, 130.54, 130.36, 129.98, 129.33, 128.41, 127.40, 127.39, 124.58, 123.58, 58.21, 52.50, 41.80, 21.26, 19.03. HRMS (ESI-TOF)  $m/z$  calc'd for  $\text{C}_{31}\text{H}_{30}\text{NaN}_2\text{O}_6\text{S}$   $[\text{M}+\text{Na}]^+$ : 581.1717; found: 581.1714.

SFC Chiralpak<sup>®</sup> IC column (30% isopropanol, 2.0 mL/min)  $t_r$  = 5.18 min (minor), 5.90 min (major): 90:10 er.

The absolute stereochemistry was assigned by analogy to compounds **4m** and **4n**.

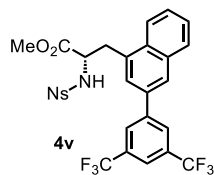

#### Methyl (*S*)-3'-((2-(3,5-dimethylphenyl)-2-((4-nitrophenyl)sulfonamido)ethyl)-4'-methyl-[1,1'-biphenyl]-2-carboxylate (**4v**)

Substrate **3j** was arylated following the general procedure by using 1-iodo-3,5-bis(trifluoromethyl)benzene (53.1  $\mu\text{L}$ , 0.30 mmol, 3.0 equiv.), AgOAc (50 mg, 0.30 mmol, 3.0 equiv.), and TBME (0.5 mL). After purification by preparative TLC chromatography (toluene/EtOAc = 5:1 v/v), compound **4v** (26.4 mg) was obtained in 42% yield as a white solid.

$^1\text{H}$  NMR (600 MHz, Chloroform-*d*)  $\delta$  8.07 (d,  $J$  = 1.5 Hz, 2H), 7.95–7.90 (m, 2H), 7.89 (d,  $J$  = 1.8 Hz, 1H), 7.85 (dd,  $J$  = 7.9, 1.5 Hz, 1H), 7.82 (d,  $J$  = 8.8 Hz, 2H), 7.62–7.53 (m, 2H), 7.50–7.44 (m, 3H), 4.47 (dd,  $J$  = 9.8, 4.6 Hz, 1H), 3.81–3.69 (m, 4H), 3.30 (dd,  $J$  = 14.4, 9.8 Hz, 1H);  $^{13}\text{C}$  NMR (150 MHz, Chloroform-*d*)  $\delta$  171.72, 149.63, 144.96, 142.33, 134.89, 134.13, 133.04, 132.63 (q,  $J$  = 33.2 Hz), 131.34, 129.63, 127.83, 127.60, 127.25, 127.22, 127.05, 126.66, 123.45 (q,  $J$  = 272.7 Hz), 123.68, 123.05, 121.50 (hept,  $J$  = 3.6 Hz),

56.66, 53.26, 36.69;  $^{19}\text{F}$  NMR (376 MHz, Chloroform-*d*)  $\delta$  -63.00. HRMS (ESI-TOF)  $m/z$  calc'd for  $\text{C}_{28}\text{H}_{21}\text{F}_6\text{N}_2\text{O}_6\text{S}$   $[\text{M}+\text{H}]^+$ : 627.1019; found: 581.1048.

SFC Chiralpak<sup>®</sup> IC column (20% isopropanol, 2.0 mL/min)  $t_r$  = 3.17 min (major), 4.20 min (minor): 92:8 er. The absolute stereochemistry was assigned by analogy to compounds **4m** and **4n**.

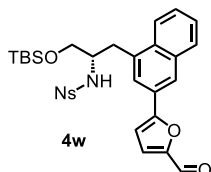

**(S)-N-(1-((*tert*-butyldimethylsilyloxy)-3-(3-(5-formylfuran-2-yl)naphthalen-1-yl)propan-2-yl)-4-nitrobenzenesulfonamide (**4w**)**

Substrate **3m** was arylated following the general procedure by using 5-iodofuran-2-carbaldehyde (22.2 mg, 0.10 mmol, 1.0 equiv.) and TBME (1 mL). After purification by preparative TLC chromatography (hexane/EtOAc = 2:1 v/v), compound **4w** (23.4 mg) was obtained in 39% yield as an orange solid.

$^1\text{H}$  NMR (600 MHz, Chloroform-*d*)  $\delta$  9.71 (s, 1H), 7.98 (s, 1H), 7.83 (d,  $J$  = 9.1 Hz, 1H), 7.77–7.70 (m, 1H), 7.64 (d,  $J$  = 8.5 Hz, 2H), 7.55–7.44 (m, 3H), 7.38 (d,  $J$  = 3.9 Hz, 1H), 7.33 (d,  $J$  = 8.5 Hz, 2H), 6.92 (d,  $J$  = 3.9 Hz, 1H), 5.16 (d,  $J$  = 7.8 Hz, 1H), 3.92 (d,  $J$  = 6.9 Hz, 1H), 3.70 (d,  $J$  = 6.2 Hz, 2H), 3.52 (dd,  $J$  = 14.4, 4.0 Hz, 1H), 2.95 (dd,  $J$  = 14.4, 9.6 Hz, 1H), 1.00 (s, 9H), 0.16 (d,  $J$  = 12.2 Hz, 6H);  $^{13}\text{C}$  NMR (150 MHz, Chloroform-*d*)  $\delta$  177.38, 158.76, 152.39, 149.14, 145.38, 135.00, 133.74, 131.88, 129.50, 127.67, 127.19, 127.13, 125.84, 124.44, 124.11, 123.52, 123.43, 108.36, 66.27, 56.29, 35.74, 26.09, 18.51, -5.19, -5.24. HRMS (ESI-TOF)  $m/z$  calc'd for  $\text{C}_{30}\text{H}_{35}\text{N}_2\text{O}_7\text{SSi}$   $[\text{M}+\text{H}]^+$ : 595.1929; found: 595.1927.

SFC Chiralpak<sup>®</sup> IC column (20% isopropanol, 2.0 mL/min)  $t_r$  = 9.35 min (major), 10.69 min (minor): 90:10 er. The absolute stereochemistry was assigned by analogy to compounds **4m** and **4n**.

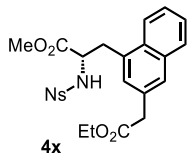

**Methyl (S)-3-(3-(2-ethoxy-2-oxoethyl)naphthalen-1-yl)-2-((4-nitrophenyl)sulfonamido)propanoate (**4x**)**

Substrate **3j** was alkylated following the general procedure by using 4-acetylpyridine as ligand (2.2  $\mu\text{L}$ , 20  $\mu\text{mol}$ , 20 mol%), ethyl 2-iodoacetate (35.5  $\mu\text{L}$ , 0.30 mmol, 3.0 equiv.), AgOAc (50 mg, 0.30 mmol, 3.0 equiv.), (+)-NBE-CO<sub>2</sub>Me (7.5 mg, 50  $\mu\text{mol}$ , 50 mol%), and DCM (1 mL) at 80 °C for 48 hours. After purification by preparative TLC chromatography (toluene/EtOAc = 5:1 v/v), compound **4x** (20.1 mg) was obtained in 40% yield as a white solid.

$^1\text{H}$  NMR (600 MHz, Chloroform-*d*)  $\delta$  7.74 (d,  $J$  = 8.3 Hz, 1H), 7.70 (d,  $J$  = 8.8 Hz, 2H), 7.59 (dd,  $J$  = 8.0, 1.4 Hz, 1H), 7.50 (s, 1H), 7.42 (ddd,  $J$  = 8.4, 6.8, 1.5 Hz, 1H), 7.38 (td,  $J$  = 7.5, 7.0, 1.6 Hz, 3H), 7.15 (d,  $J$  = 1.7 Hz, 1H), 5.53 (d,  $J$  = 9.3 Hz, 1H), 4.29 (ddd,  $J$  = 10.7, 9.2, 4.2 Hz, 1H), 4.24 (q,  $J$  = 7.1 Hz, 2H), 3.80 (s, 3H), 3.71 (s, 2H), 3.63 (dd,  $J$  = 14.3, 4.2 Hz, 1H), 3.07 (dd,  $J$  = 14.3, 10.7 Hz, 1H), 1.33 (t,  $J$  = 7.1 Hz, 3H);  $^{13}\text{C}$  NMR (150 MHz, Chloroform-*d*)  $\delta$  171.92, 171.62, 149.25, 144.26, 133.97, 131.53, 131.38, 130.19, 130.18, 128.69, 128.47, 127.57, 126.60, 126.47, 123.43, 122.73, 61.39, 56.23, 53.23, 41.17, 36.43, 14.43. HRMS (ESI-TOF)  $m/z$  calc'd for  $\text{C}_{24}\text{H}_{25}\text{N}_2\text{O}_8\text{S}$   $[\text{M}+\text{H}]^+$ : 501.1326; found: 501.1323.

SFC Chiralpak<sup>®</sup> IC column (30% isopropanol, 2.0 mL/min)  $t_r$  = 6.10 min (major), 17.17 min (minor): 90:10 er. The absolute stereochemistry was assigned by analogy to compounds **4m** and **4n**.

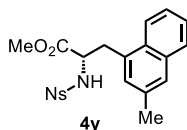

**Methyl (S)-3-(3-methylnaphthalen-1-yl)-2-((4-nitrophenyl)sulfonamido)propanoate (**4y**)**

Substrate **3j** was alkylated following the general procedure by using 4-acetylpyridine as ligand (2.2  $\mu\text{L}$ , 20  $\mu\text{mol}$ , 20 mol%), iodomethane (18.7  $\mu\text{L}$ , 0.30 mmol, 3.0 equiv.), AgOAc (50 mg, 0.30 mmol, 3.0 equiv.), and DCM (1 mL). After purification by preparative TLC chromatography (hexane/EtOAc = 2:1 v/v), compound **4y** (15.4 mg) was obtained in 36% yield as yellow solid.

$^1\text{H}$  NMR (600 MHz, Chloroform-*d*)  $\delta$  7.80–7.69 (m, 3H), 7.60 (d,  $J$  = 7.1 Hz, 1H), 7.44–7.31 (m, 5H), 6.98 (s, 1H), 5.34 (d,  $J$  = 9.3 Hz, 1H), 4.40–4.25 (m, 1H), 3.78 (s, 3H), 3.62 (d,  $J$  = 14.7 Hz, 1H), 3.12–2.98 (m, 1H), 2.40 (s, 3H);  $^{13}\text{C}$  NMR (150 MHz, Chloroform-*d*)  $\delta$  171.90, 149.42, 144.55, 135.00, 134.27, 130.98, 130.69, 129.58, 128.39, 127.40, 127.30, 126.25, 125.88, 123.49, 122.64, 56.54, 53.17, 36.51, 21.54. HRMS (ESI-TOF)  $m/z$  calc'd for  $\text{C}_{21}\text{H}_{21}\text{N}_2\text{O}_6\text{S}$   $[\text{M}+\text{H}]^+$ : 429.1115; found: 429.1119.

SFC Chiralpak<sup>®</sup> IC column (40% isopropanol, 2.0 mL/min)  $t_r$  = 3.70 min (major), 6.83 min (minor): 92:8 er. The absolute stereochemistry was assigned by analogy to compounds **4m** and **4n**.

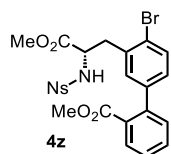

### Methyl (S)-4'-bromo-3'-(3-methoxy-2-((4-nitrophenyl)sulfonamido)-3-oxopropyl)-[1,1'-biphenyl]-2-carboxylate (**4z**)

Substrate **3l** was arylated following the general procedure by using methyl 2-bromobenzoate (21.2  $\mu\text{L}$ , 0.15 mmol, 1.5 equiv.) and TBME (1 mL) at 80  $^\circ\text{C}$  for 48 hours. After purification by preparative TLC chromatography (toluene/EtOAc = 5:1 v/v), compound **4z** (23.7 mg) was obtained in 41% yield as a white solid.

$^1\text{H}$  NMR (600 MHz, Chloroform-*d*)  $\delta$  8.22 (d,  $J$  = 8.4 Hz, 2H), 7.96 (d,  $J$  = 7.8 Hz, 1H), 7.91 (d,  $J$  = 8.4 Hz, 2H), 7.58 (t,  $J$  = 7.6 Hz, 1H), 7.48 (t,  $J$  = 7.6 Hz, 1H), 7.42 (d,  $J$  = 8.1 Hz, 1H), 7.28 (d,  $J$  = 9.8 Hz, 1H), 7.15 (s, 1H), 7.06 (d,  $J$  = 8.2 Hz, 1H), 5.55 (d,  $J$  = 9.1 Hz, 1H), 4.42 (q,  $J$  = 8.6, 8.2 Hz, 1H), 3.81 (s, 3H), 3.69 (s, 3H), 3.29 (dd,  $J$  = 14.1, 5.3 Hz, 1H), 3.08 (dd,  $J$  = 14.1, 9.3 Hz, 1H);  $^{13}\text{C}$  NMR (150 MHz, Chloroform-*d*)  $\delta$  171.42, 168.22, 150.05, 145.56, 141.32, 141.17, 134.08, 132.79, 132.32, 132.00, 130.86, 130.63, 129.84, 129.31, 128.57, 128.04, 124.24, 123.57, 55.53, 53.08, 52.51, 39.13. HRMS (ESI-TOF)  $m/z$  calc'd for  $\text{C}_{24}\text{H}_{22}\text{BrN}_2\text{O}_8\text{S}$   $[\text{M}+\text{H}]^+$ : 577.0275; found: 577.0277.

SFC Chiralpak<sup>®</sup> IC column (30% isopropanol, 2.0 mL/min)  $t_r$  = 6.16 min (major), 8.91 min (minor): 92:8 er. The absolute stereochemistry was assigned by analogy to compounds **4m** and **4n**.

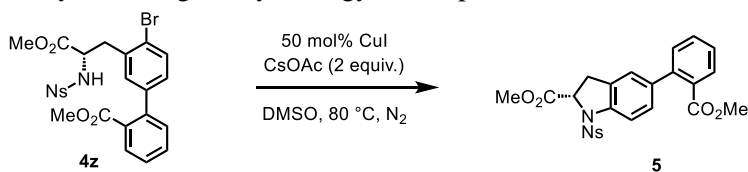

### Methyl (S)-5-(2-(methoxycarbonyl)phenyl)-1-((4-nitrophenyl)sulfonyl)indoline-2-carboxylate (**5**)

Compound **4z** (17.3 mg, 30  $\mu\text{mol}$ , 1.0 equiv), CuI (2.9 mg, 15  $\mu\text{mol}$ , 50 mol%) and CsOAc (11.5 mg, 60  $\mu\text{mol}$ , 2.0 equiv.) were added into a flame-dried Schlenk tube. The Schlenk tube was evacuated and back-filled with nitrogen. DMSO (0.5 mL) was added to the reaction mixture. The Schlenk tube was immersed into a pre-heated oil bath at 80  $^\circ\text{C}$ . After 2.5 hours, the oil bath was removed, and the Schlenk tube was cooled to room temperature. Water was added into the reaction mixture, which was then extracted with EtOAc. The combined organic layers were dried with  $\text{Na}_2\text{SO}_4$ . The solvent was removed by evaporation under reduced pressure. Purification by preparative TLC chromatography (hexane/EtOAc = 2:1 v/v) afforded the 11.2 mg compound **5** as a yellow solid (75% yield).

$^1\text{H}$  NMR (600 MHz, Chloroform-*d*)  $\delta$  8.33 (d,  $J$  = 8.9 Hz, 2H), 8.05 (d,  $J$  = 8.9 Hz, 2H), 7.83 (dd,  $J$  = 7.8, 1.6 Hz, 1H), 7.55 (d,  $J$  = 8.3 Hz, 1H), 7.51 (td,  $J$  = 7.6, 1.5 Hz, 1H), 7.40 (td,  $J$  = 7.6, 1.5 Hz, 1H), 7.28 (dd,  $J$  =

7.6, 1.5 Hz, 1H), 7.17 (dd,  $J = 8.3, 2.1$  Hz, 1H), 7.05 (d,  $J = 1.7$  Hz, 1H), 4.90 (dd,  $J = 10.5, 4.9$  Hz, 1H), 3.82 (s, 3H), 3.68 (s, 3H), 3.27 (dd,  $J = 16.4, 10.5$  Hz, 1H), 3.18 (dd,  $J = 16.6, 4.8$  Hz, 1H);  $^{13}\text{C}$  NMR (150 MHz, Chloroform-*d*)  $\delta$  171.11, 168.61, 150.68, 143.49, 141.73, 139.91, 138.74, 131.58, 130.81, 130.60, 130.17, 129.63, 128.85, 128.79, 127.58, 125.40, 124.54, 114.94, 62.70, 53.23, 52.15, 33.03. HRMS (ESI-TOF)  $m/z$  calc'd for  $\text{C}_{24}\text{H}_{21}\text{N}_2\text{O}_8\text{S}$   $[\text{M}+\text{H}]^+$ : 497.1013; found: 497.1014.

SFC Chiralpak<sup>®</sup> IC column (30% isopropanol, 2.0 mL/min)  $t_r = 7.72$  min (major), 9.73 min (minor): 91:9 er.

**X-RAY CRYSTALLOGRAPHIC DATA**X-ray structure of **2ah**: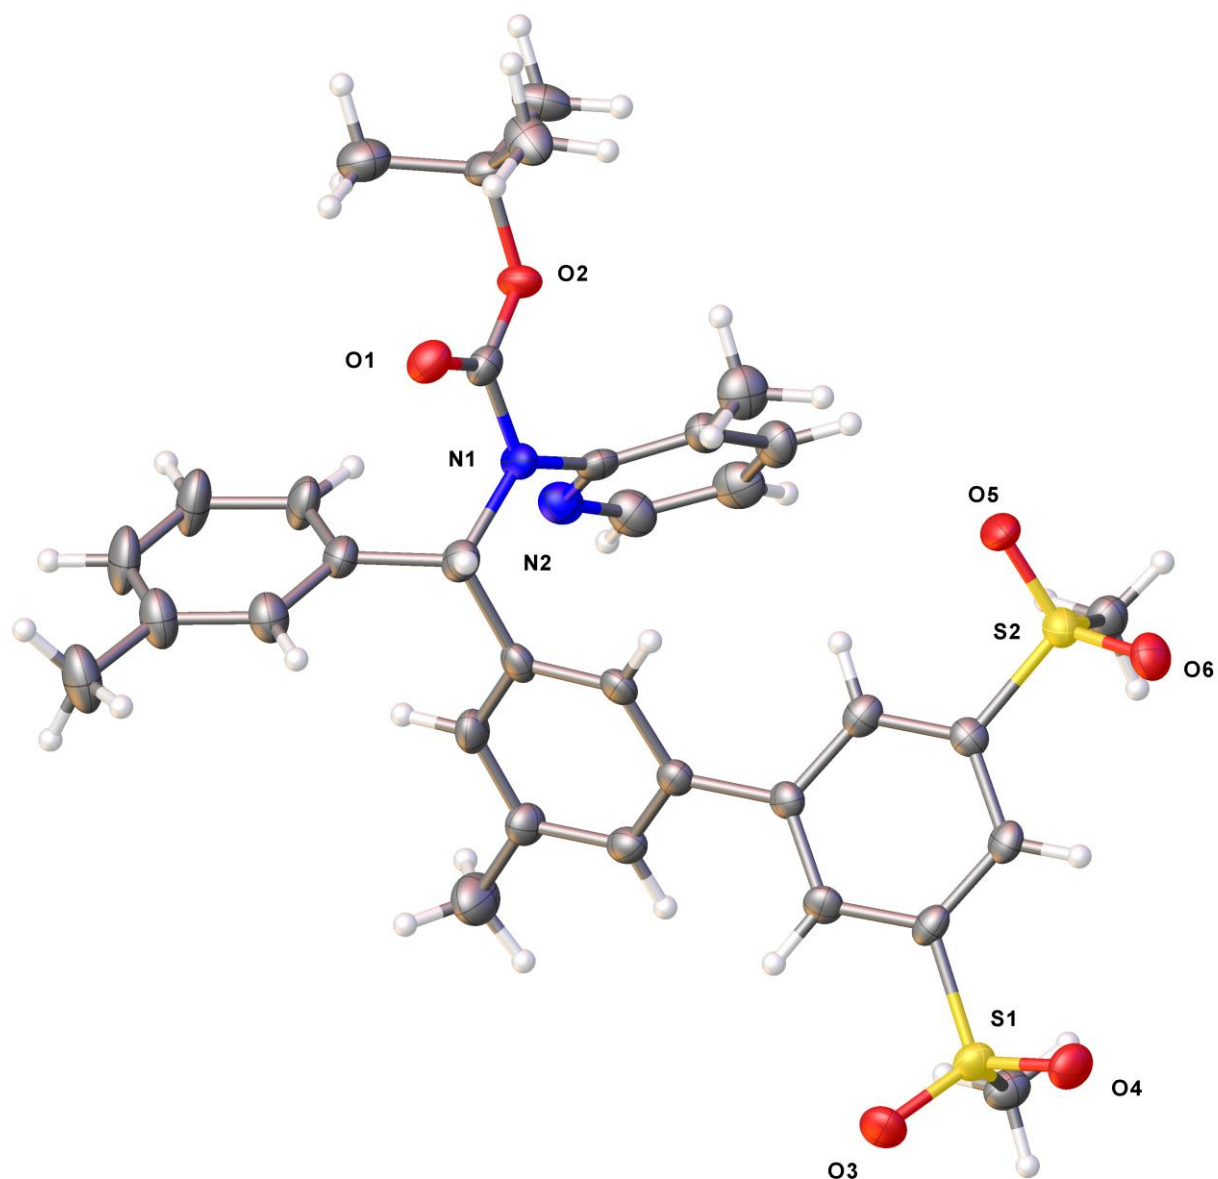Crystal data and structure refinement for **2ah**

|                     |                                                                              |
|---------------------|------------------------------------------------------------------------------|
| Report date         | 2017-09-22                                                                   |
| Identification code | IV-38-5                                                                      |
| Empirical formula   | C <sub>34</sub> H <sub>38</sub> N <sub>2</sub> O <sub>6</sub> S <sub>2</sub> |
| Molecular formula   | C <sub>34</sub> H <sub>38</sub> N <sub>2</sub> O <sub>6</sub> S <sub>2</sub> |
| Formula weight      | 634.78                                                                       |
| Temperature         | 100.0 K                                                                      |
| Wavelength          | 1.54178 Å                                                                    |
| Crystal system      | Monoclinic                                                                   |
| Space group         | P 1 21 1                                                                     |

S58

|                                   |                                                         |                                                                                |
|-----------------------------------|---------------------------------------------------------|--------------------------------------------------------------------------------|
| Unit cell dimensions              | a = 10.2520(4) Å<br>b = 7.9470(3) Å<br>c = 20.6363(9) Å | $\alpha = 90^\circ$ .<br>$\beta = 104.098(2)^\circ$ .<br>$\gamma = 90^\circ$ . |
| Volume                            | 1630.65(11) Å <sup>3</sup>                              |                                                                                |
| Z                                 | 2                                                       |                                                                                |
| Density (calculated)              | 1.293 Mg/m <sup>3</sup>                                 |                                                                                |
| Absorption coefficient            | 1.863 mm <sup>-1</sup>                                  |                                                                                |
| F(000)                            | 672                                                     |                                                                                |
| Crystal size                      | 0.075 x 0.011 x 0.004 mm <sup>3</sup>                   |                                                                                |
| Crystal color, habit              | Colorless Needle                                        |                                                                                |
| Theta range for data collection   | 2.207 to 54.261°.                                       |                                                                                |
| Index ranges                      | -10<=h<=10, -8<=k<=8, -20<=l<=21                        |                                                                                |
| Reflections collected             | 14459                                                   |                                                                                |
| Independent reflections           | 3998 [R(int) = 0.0954, R(sigma) = 0.0872]               |                                                                                |
| Completeness to theta = 54.261°   | 100.0 %                                                 |                                                                                |
| Absorption correction             | Semi-empirical from equivalents                         |                                                                                |
| Max. and min. transmission        | 0.3017 and 0.2076                                       |                                                                                |
| Refinement method                 | Full-matrix least-squares on F <sup>2</sup>             |                                                                                |
| Data / restraints / parameters    | 3998 / 90 / 425                                         |                                                                                |
| Goodness-of-fit on F <sup>2</sup> | 1.014                                                   |                                                                                |
| Final R indices [I>2sigma(I)]     | R1 = 0.0459, wR2 = 0.0838                               |                                                                                |
| R indices (all data)              | R1 = 0.0719, wR2 = 0.0929                               |                                                                                |
| Absolute structure parameter      | 0.03(2)                                                 |                                                                                |
| Extinction coefficient            | n/a                                                     |                                                                                |
| Largest diff. peak and hole       | 0.187 and -0.192 e.Å <sup>-3</sup>                      |                                                                                |

X-ray structure of **4m**: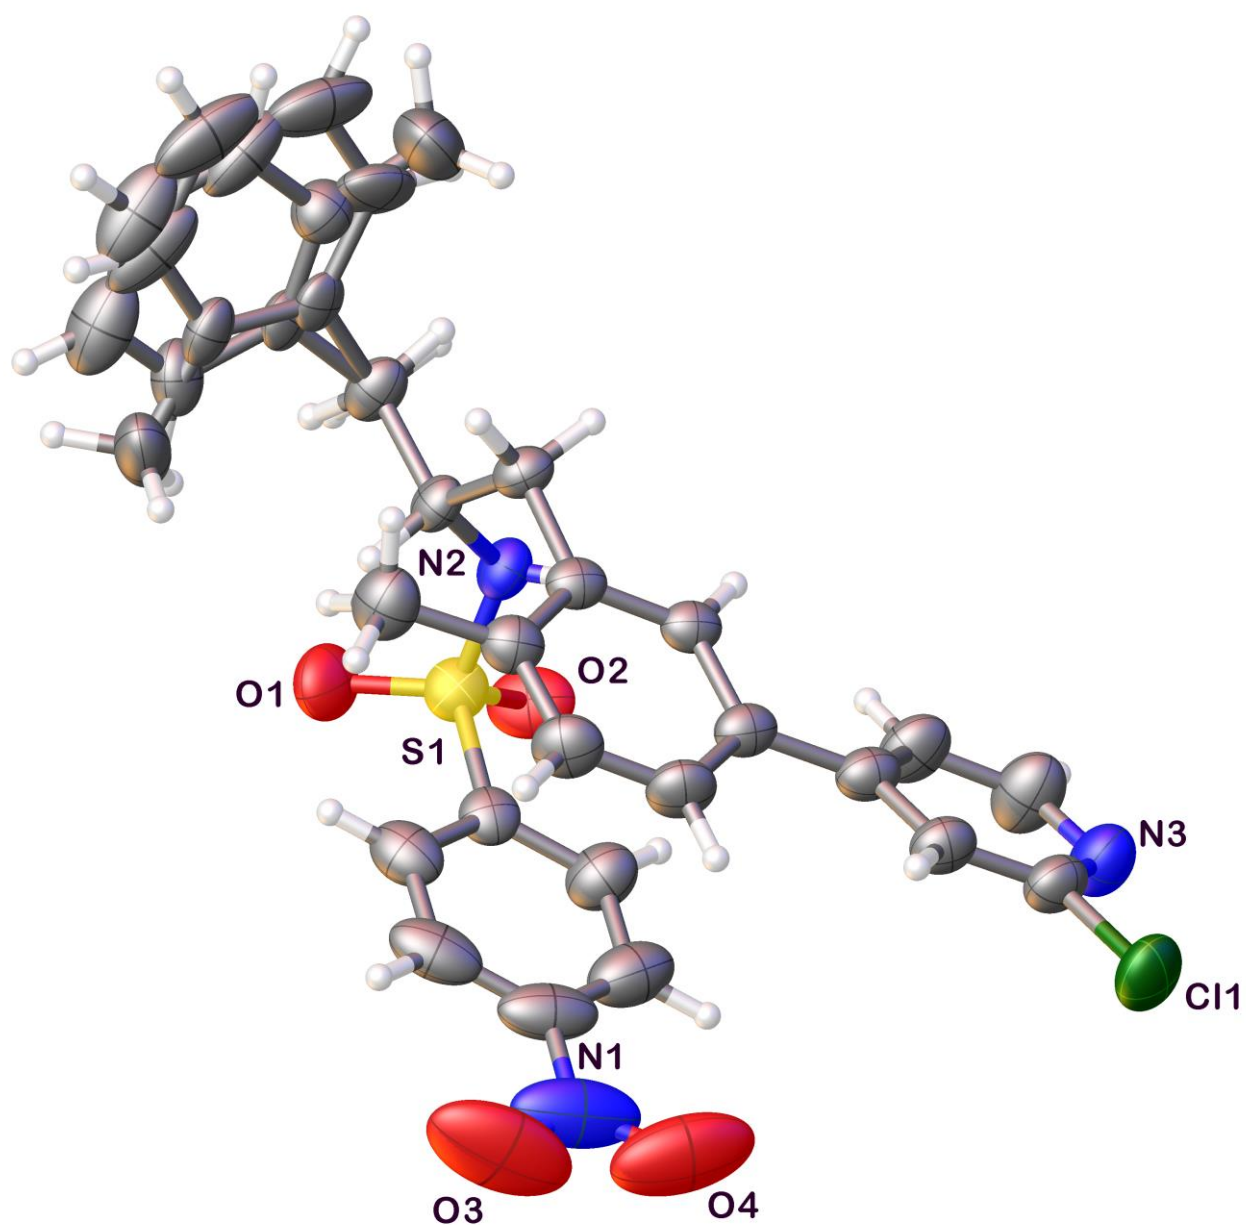Crystal data and structure refinement for **4m**

|                      |                                                                    |          |
|----------------------|--------------------------------------------------------------------|----------|
| Identification code  | yu95_0m_a                                                          |          |
| Empirical formula    | C <sub>28</sub> H <sub>26</sub> Cl N <sub>3</sub> O <sub>4</sub> S |          |
| Formula weight       | 536.03                                                             |          |
| Temperature          | 100.0 K                                                            |          |
| Wavelength           | 0.71073 Å                                                          |          |
| Crystal system       | Orthorhombic                                                       |          |
| Space group          | P2 <sub>1</sub> 2 <sub>1</sub> 2 <sub>1</sub>                      |          |
| Unit cell dimensions | a = 7.5065(6) Å                                                    | α = 90°. |
|                      | b = 17.3919(13) Å                                                  | β = 90°. |



|                                        |                                                                  |                       |
|----------------------------------------|------------------------------------------------------------------|-----------------------|
|                                        | $c = 20.3819(11) \text{ \AA}$                                    | $\gamma = 90^\circ$ . |
| Volume                                 | $2660.9(3) \text{ \AA}^3$                                        |                       |
| Z                                      | 4                                                                |                       |
| Density (calculated)                   | $1.338 \text{ Mg/m}^3$                                           |                       |
| Absorption coefficient                 | $0.261 \text{ mm}^{-1}$                                          |                       |
| F(000)                                 | 1120                                                             |                       |
| Crystal size                           | $0.28 \times 0.2 \times 0.14 \text{ mm}^3$                       |                       |
| Theta range for data collection        | $2.892$ to $24.998^\circ$ .                                      |                       |
| Index ranges                           | $-7 \leq h \leq 8$ , $-20 \leq k \leq 14$ , $-24 \leq l \leq 24$ |                       |
| Reflections collected                  | 7623                                                             |                       |
| Independent reflections                | 4527 [R(int) = 0.0247]                                           |                       |
| Completeness to theta = $24.998^\circ$ | 99.1 %                                                           |                       |
| Absorption correction                  | Semi-empirical from equivalents                                  |                       |
| Max. and min. transmission             | 0.8012 and 0.7059                                                |                       |
| Refinement method                      | Full-matrix least-squares on $F^2$                               |                       |
| Data / restraints / parameters         | 4527 / 348 / 377                                                 |                       |
| Goodness-of-fit on $F^2$               | 1.037                                                            |                       |
| Final R indices [I > 2sigma(I)]        | R1 = 0.0490, wR2 = 0.1009                                        |                       |
| R indices (all data)                   | R1 = 0.0772, wR2 = 0.1147                                        |                       |
| Absolute structure parameter           | 0.03(5) [abs stereochem determined]                              |                       |
| Extinction coefficient                 | n/a                                                              |                       |
| Largest diff. peak and hole            | $0.214$ and $-0.231 \text{ e.\AA}^{-3}$                          |                       |

X-ray structure of **4n**: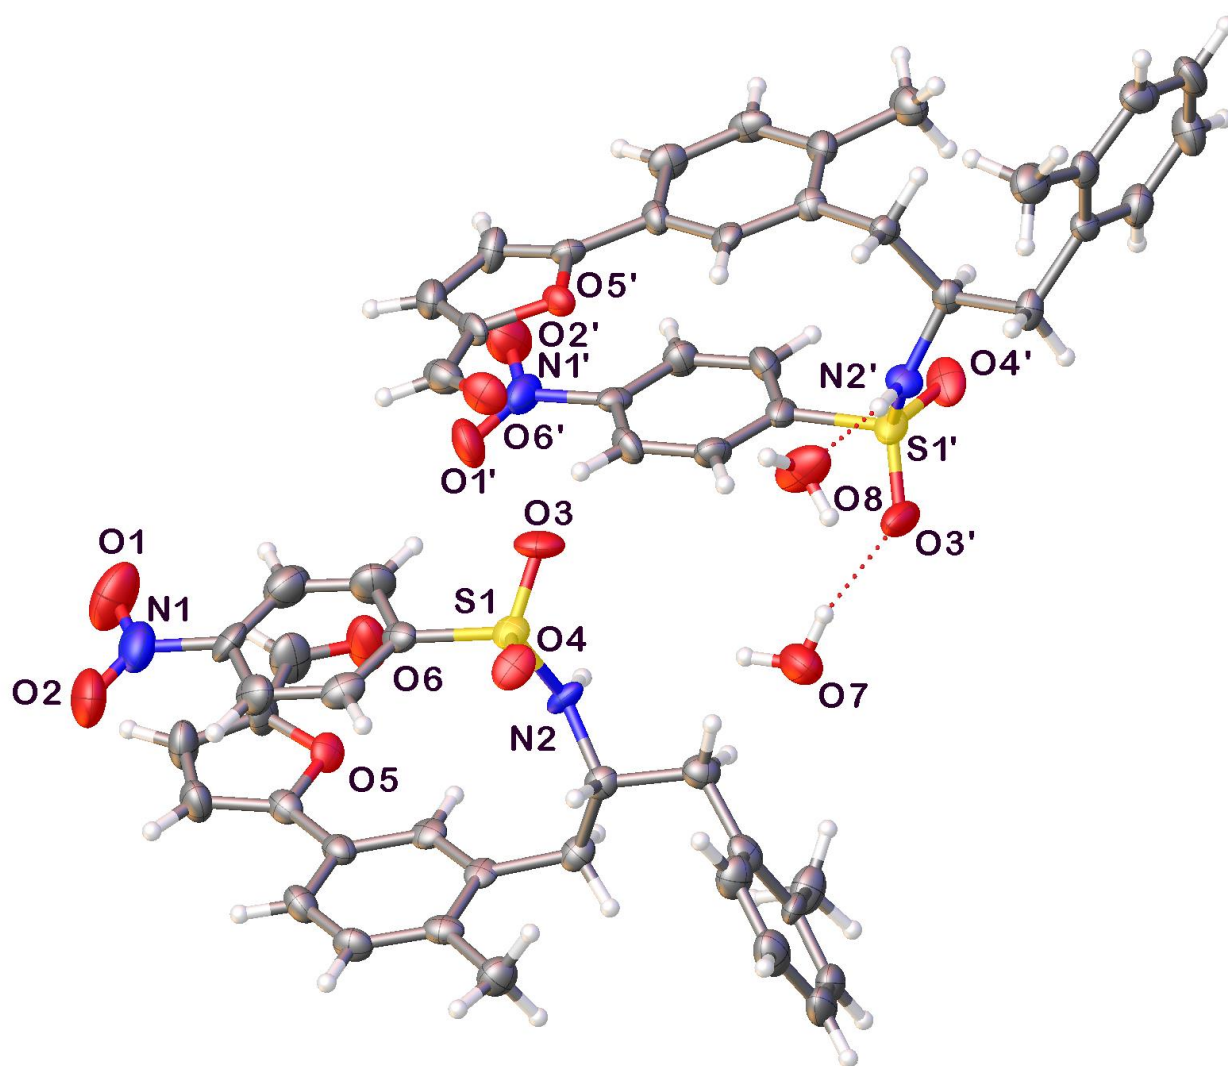Crystal data and structure refinement for **4n**

|                      |                                                                 |                  |
|----------------------|-----------------------------------------------------------------|------------------|
| Identification code  | III-152-3                                                       |                  |
| Empirical formula    | C <sub>28</sub> H <sub>28</sub> N <sub>2</sub> O <sub>7</sub> S |                  |
| Formula weight       | 536.58                                                          |                  |
| Temperature          | 100.0 K                                                         |                  |
| Wavelength           | 0.71073 Å                                                       |                  |
| Crystal system       | Monoclinic                                                      |                  |
| Space group          | P 21                                                            |                  |
| Unit cell dimensions | a = 12.891(9) Å                                                 | α = 90°.         |
|                      | b = 7.214(5) Å                                                  | β = 97.295(15)°. |
|                      | c = 28.37(2) Å                                                  | γ = 90°.         |
| Volume               | 2617(3) Å <sup>3</sup>                                          |                  |
| Z                    | 4                                                               |                  |

|                                   |                                             |
|-----------------------------------|---------------------------------------------|
| Density (calculated)              | 1.362 Mg/m <sup>3</sup>                     |
| Absorption coefficient            | 0.174 mm <sup>-1</sup>                      |
| F(000)                            | 1128                                        |
| Crystal size                      | 0.28 x 0.2 x 0.1 mm <sup>3</sup>            |
| Theta range for data collection   | 1.447 to 25.778°.                           |
| Index ranges                      | -15<=h<=15, -8<=k<=8, -34<=l<=31            |
| Reflections collected             | 18746                                       |
| Independent reflections           | 18746 [R(int) = ?]                          |
| Completeness to theta = 25.242°   | 91.2 %                                      |
| Absorption correction             | None                                        |
| Max. and min. transmission        | 0.2589 and 0.2069                           |
| Refinement method                 | Full-matrix least-squares on F <sup>2</sup> |
| Data / restraints / parameters    | 18746 / 3 / 702                             |
| Goodness-of-fit on F <sup>2</sup> | 1.000                                       |
| Final R indices [I>2sigma(I)]     | R1 = 0.0507, wR2 = 0.1279                   |
| R indices (all data)              | R1 = 0.0618, wR2 = 0.1330                   |
| Absolute structure parameter      | 0.08(6)                                     |
| Extinction coefficient            | n/a                                         |
| Largest diff. peak and hole       | 0.359 and -0.287 e.Å <sup>-3</sup>          |

## NMR SPECTRA

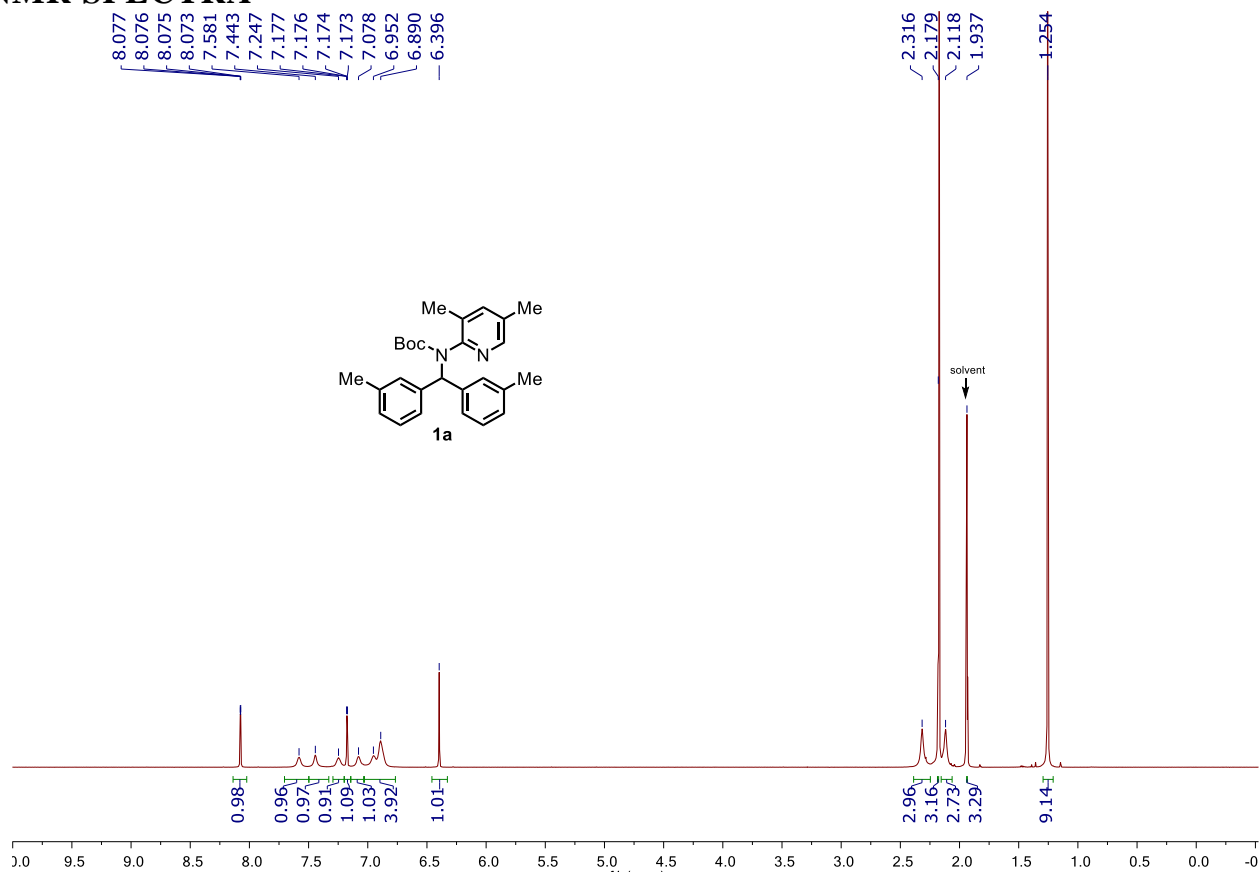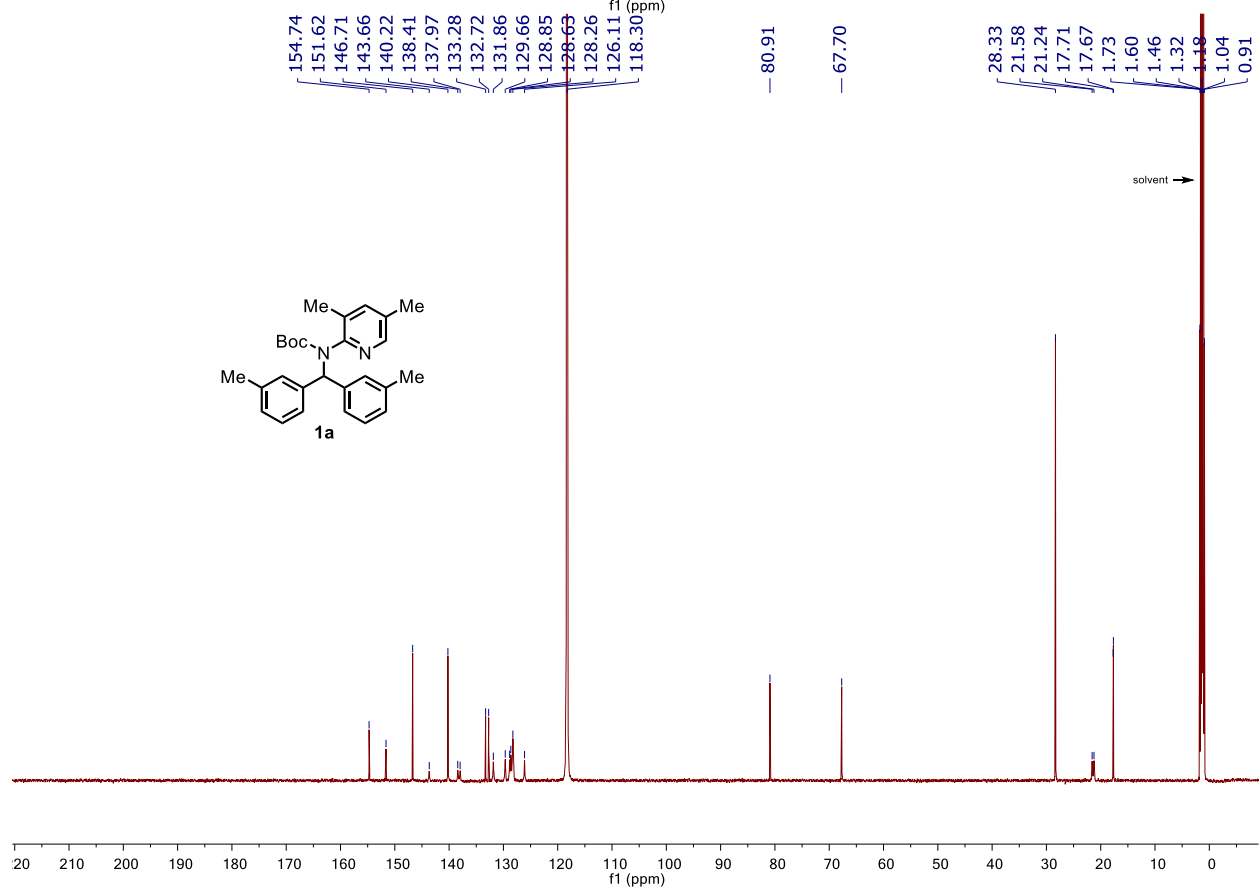

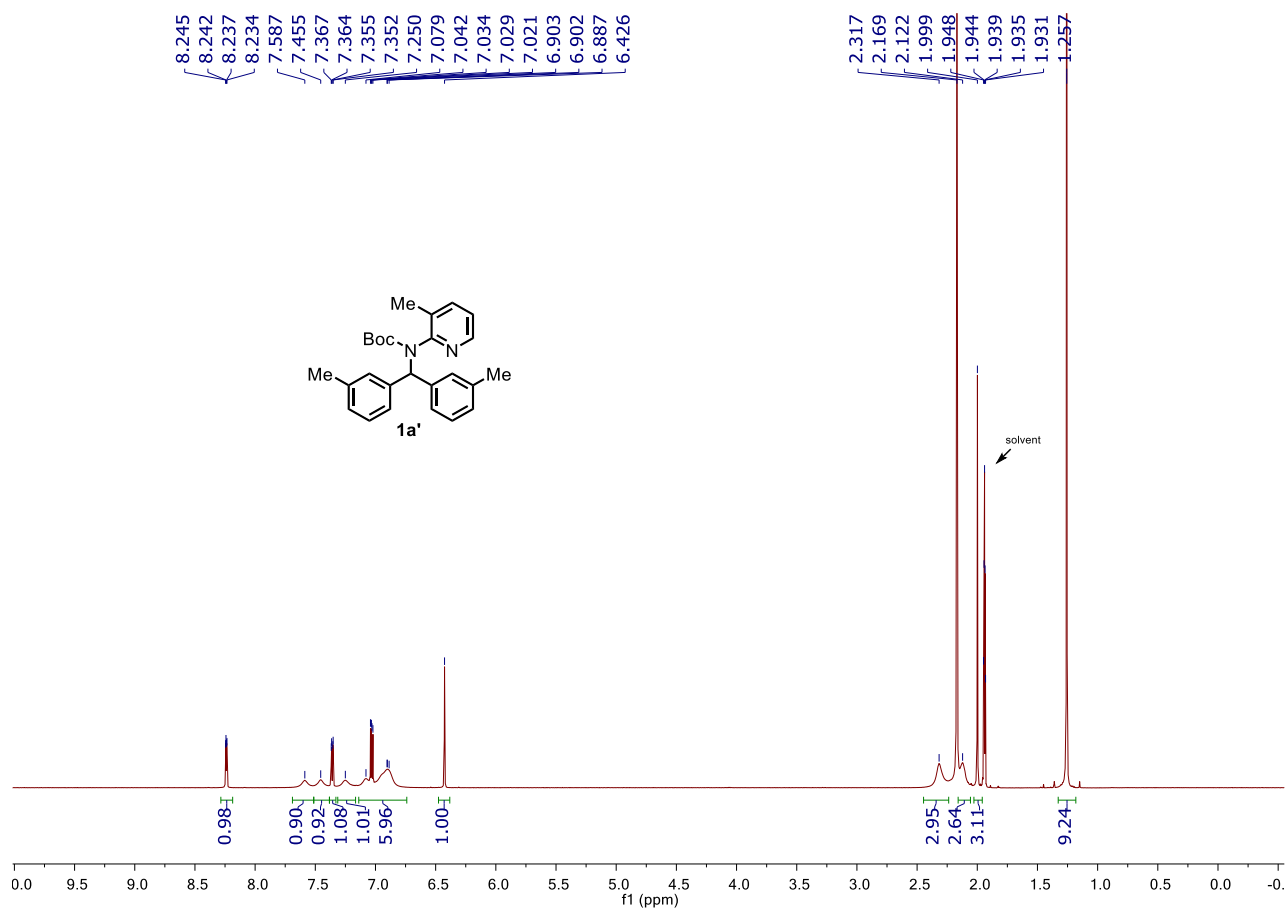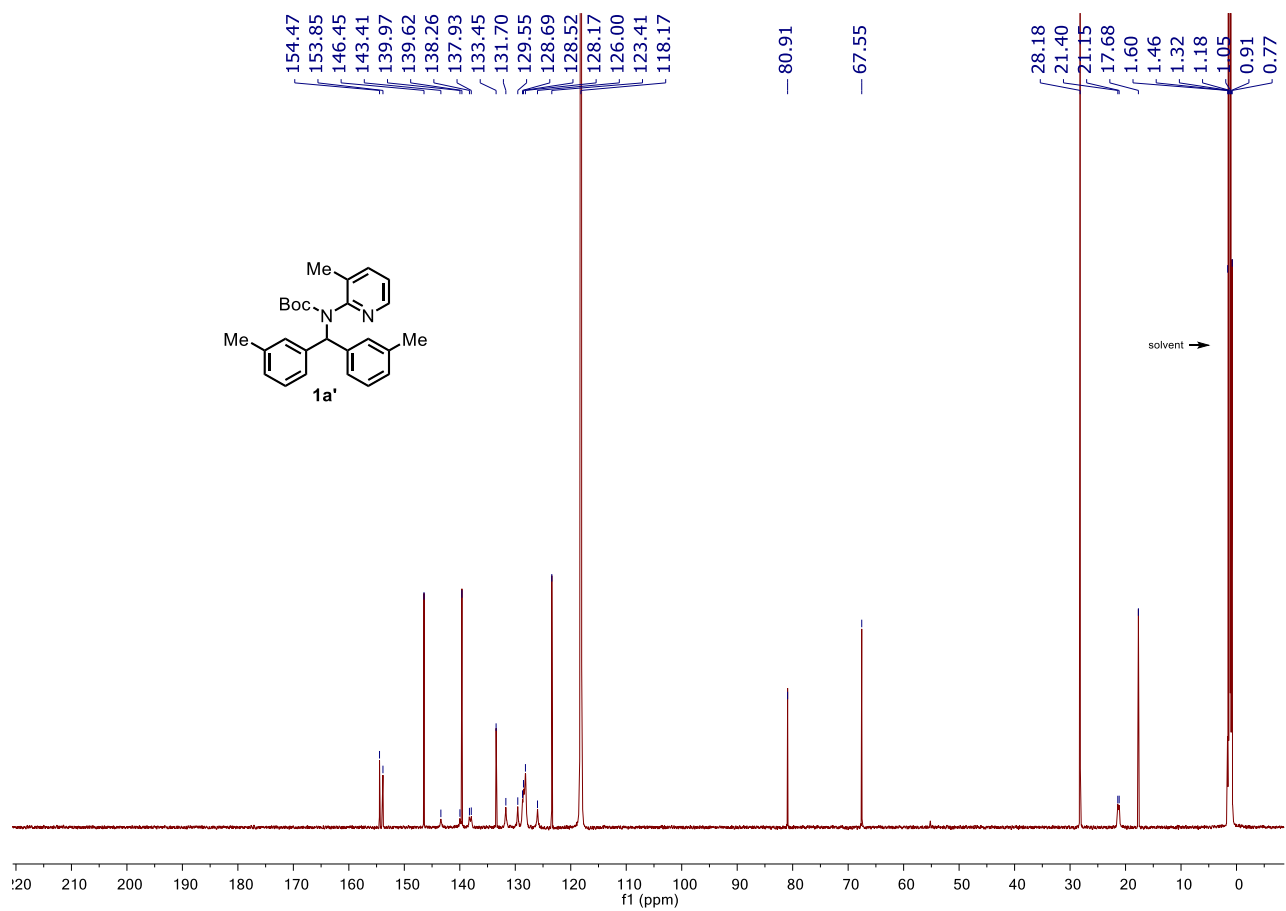

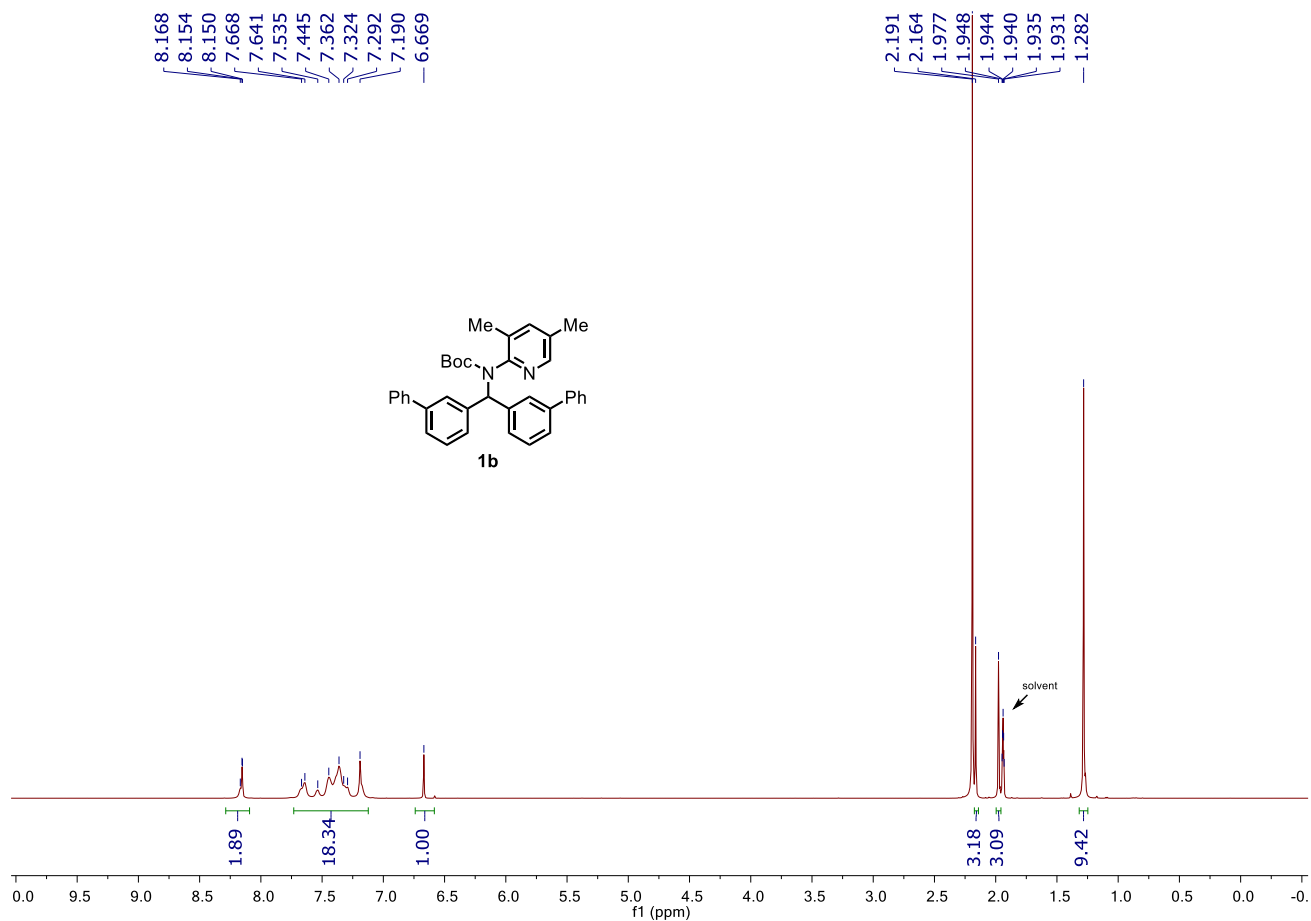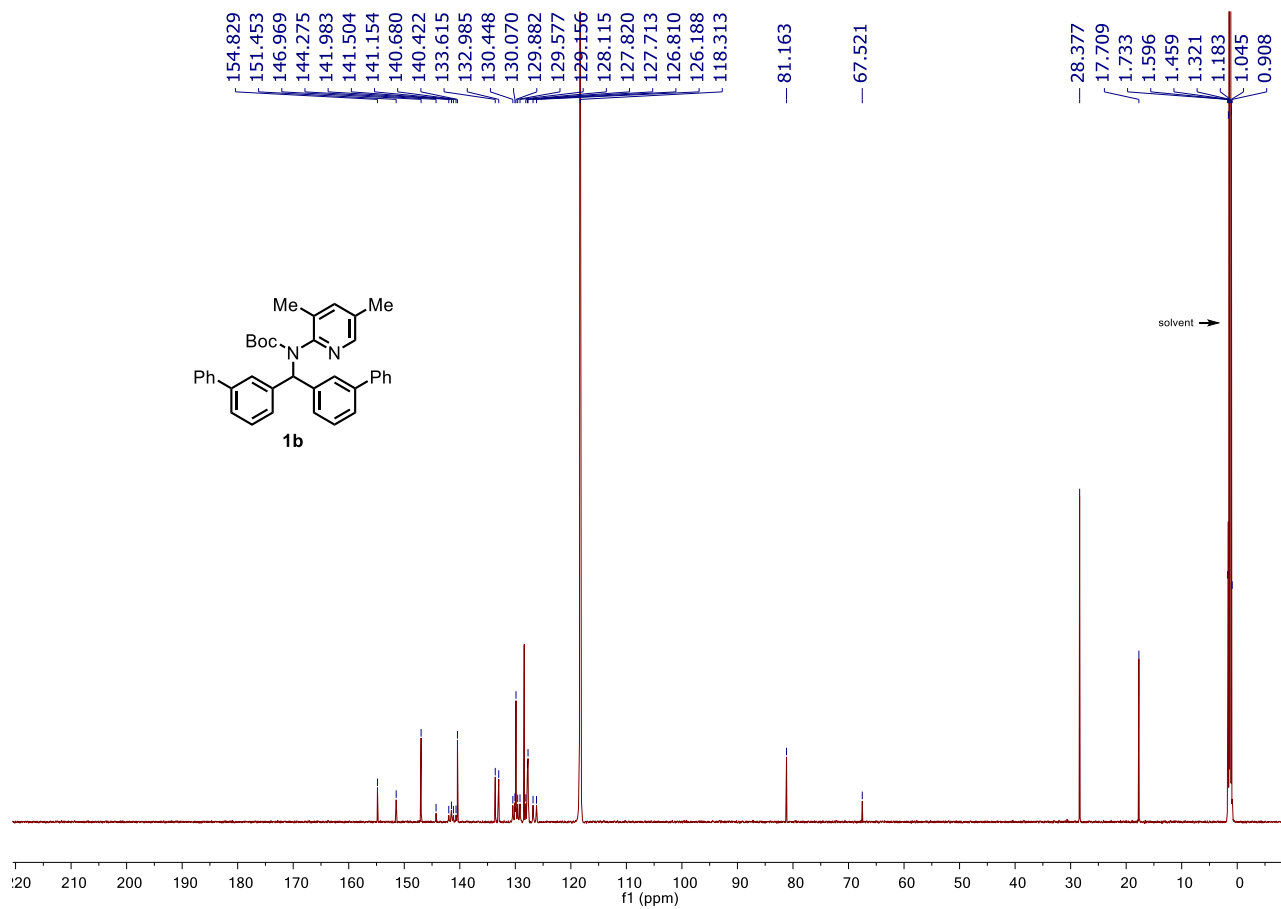

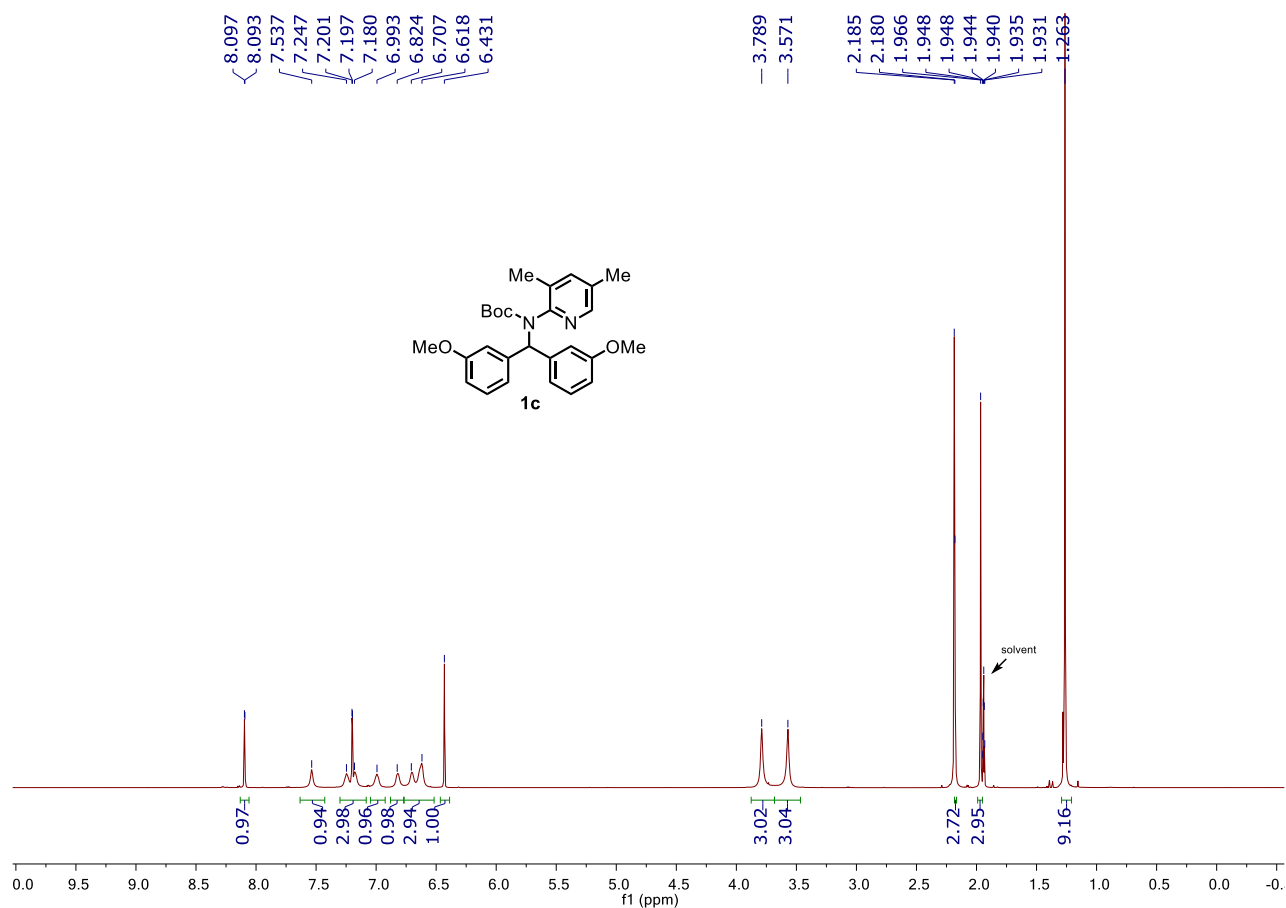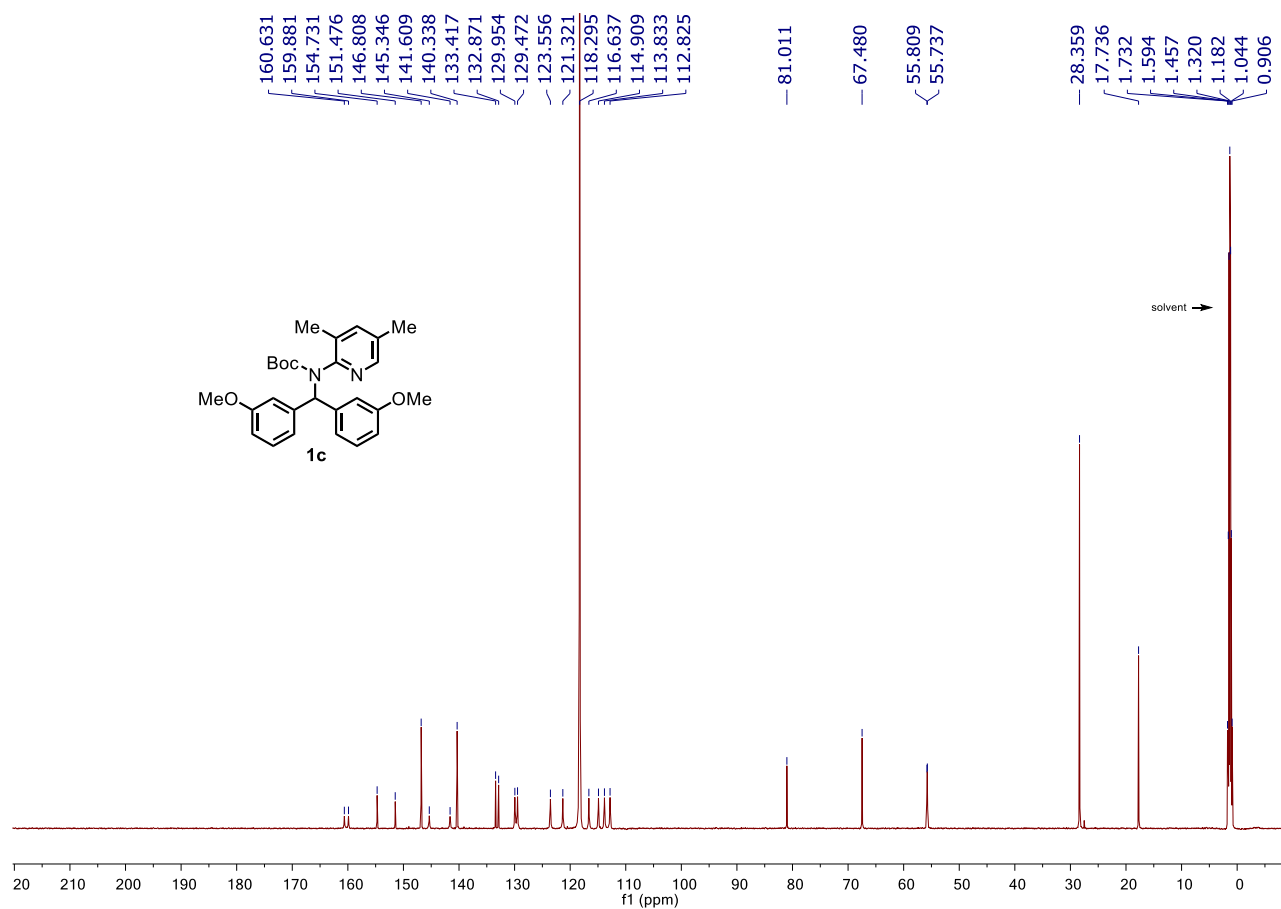

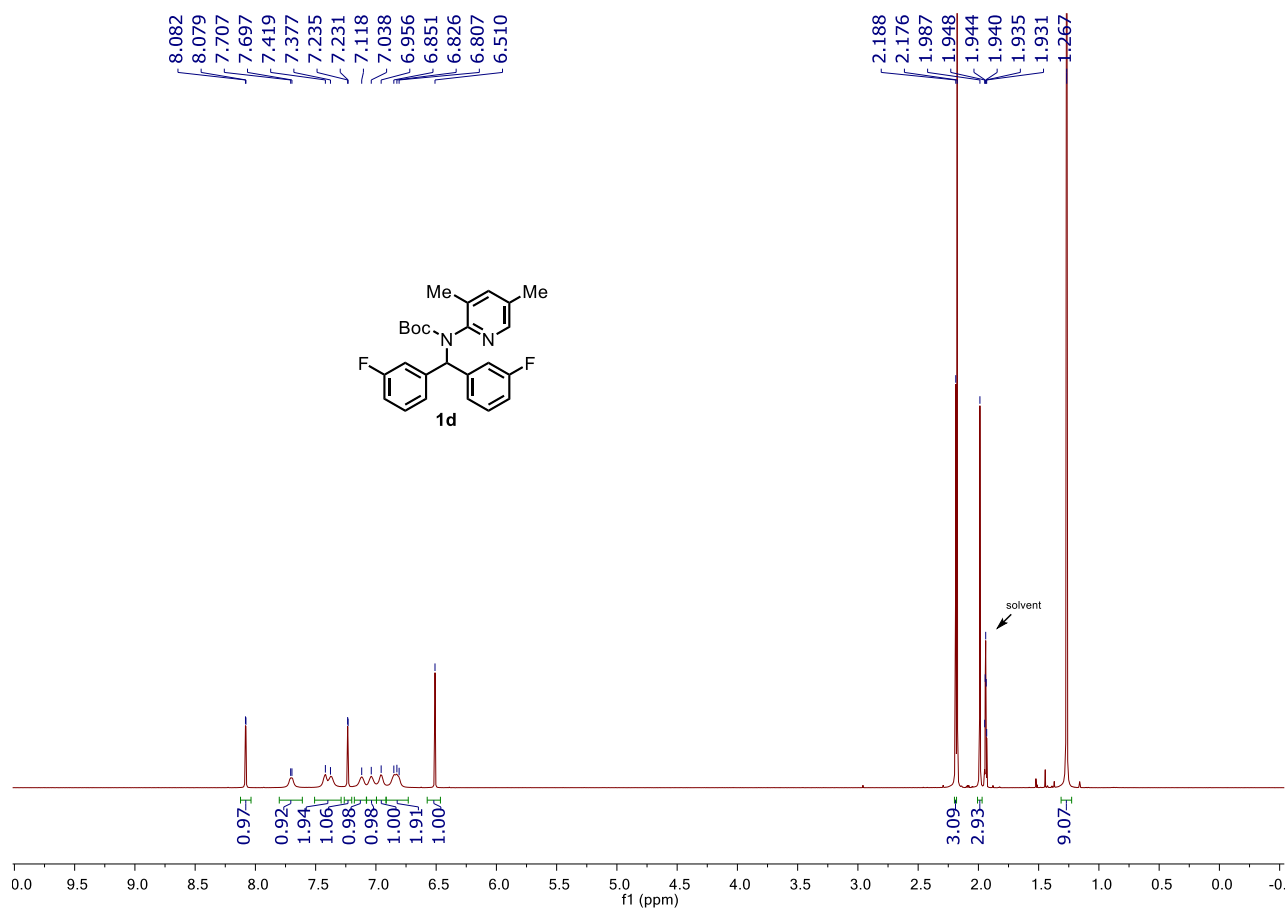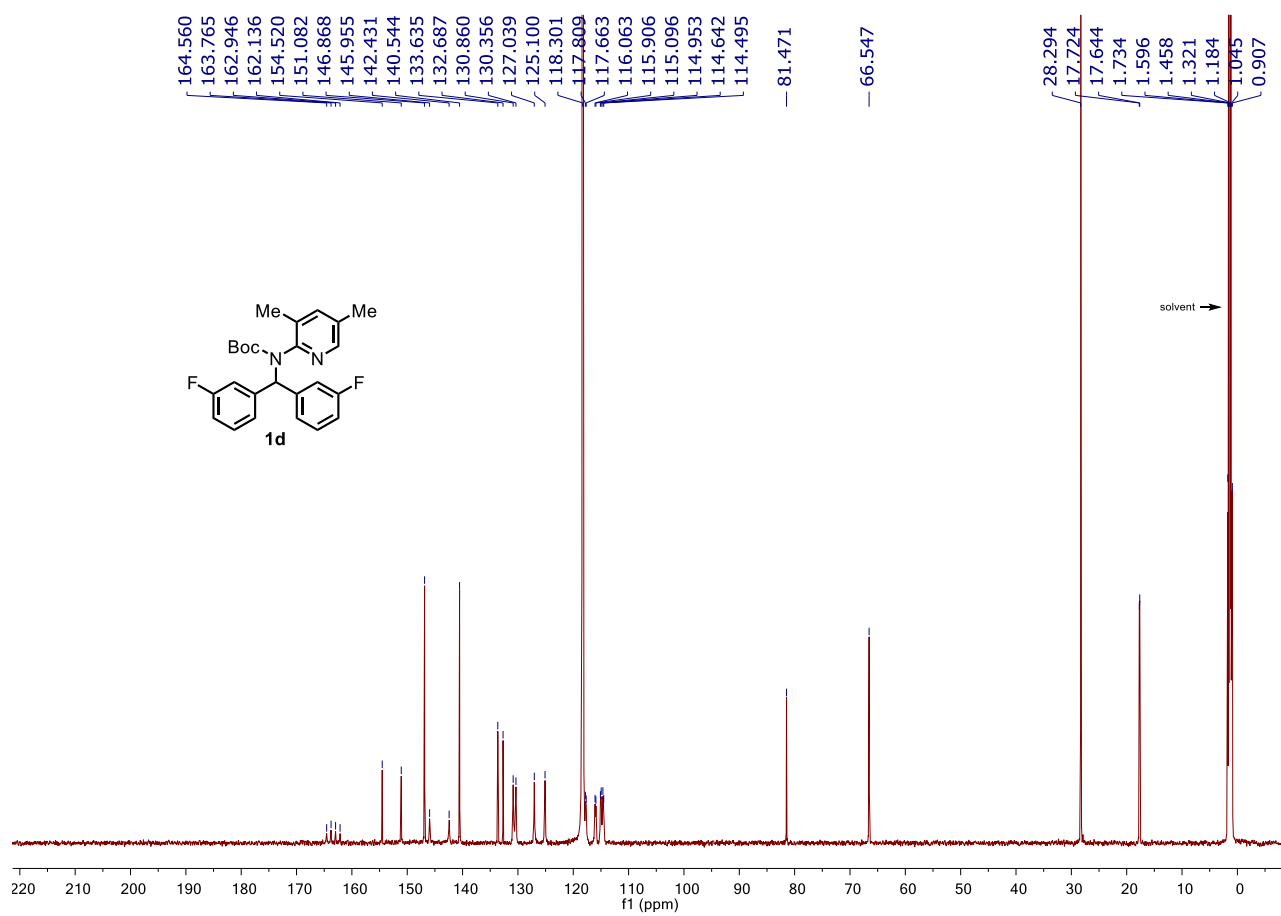



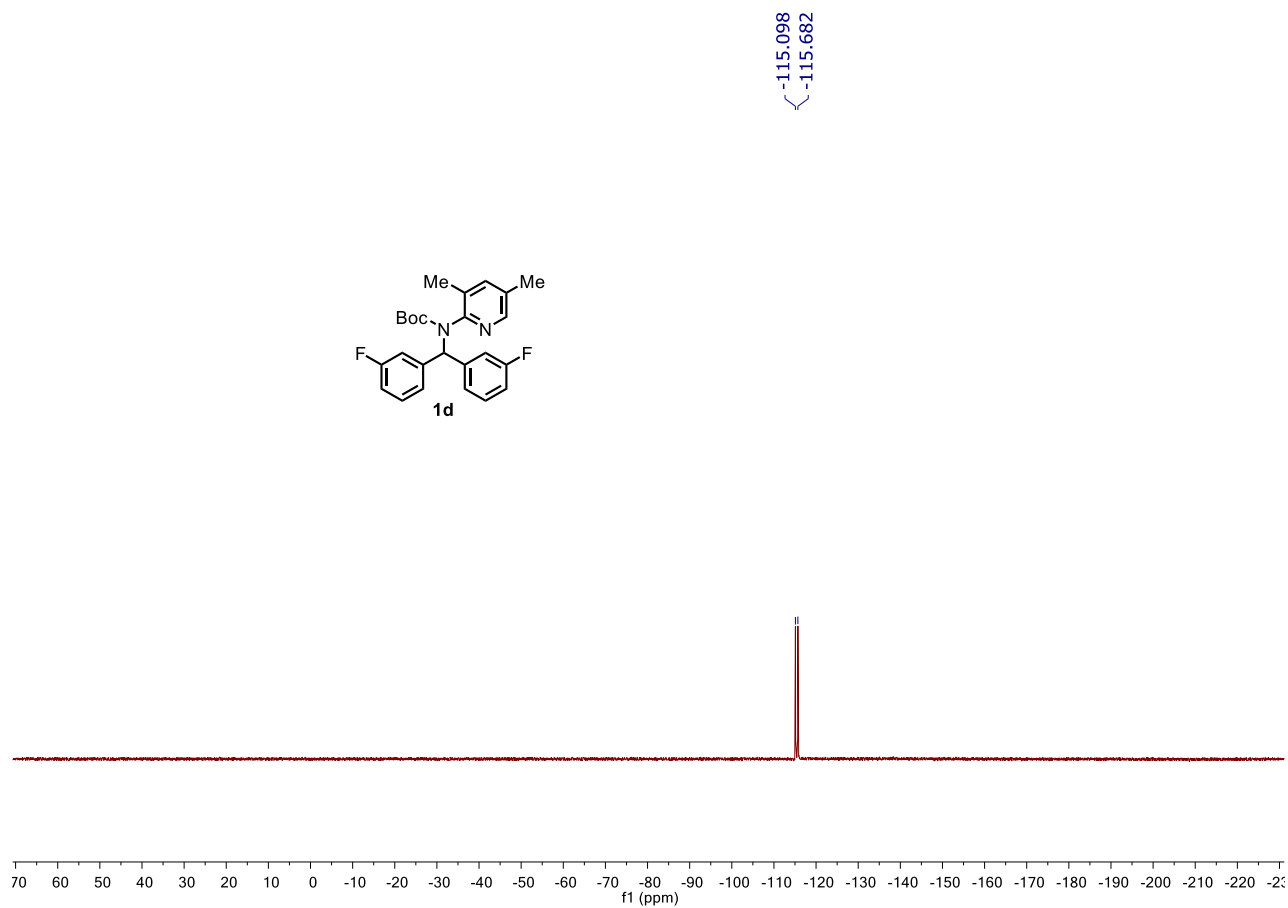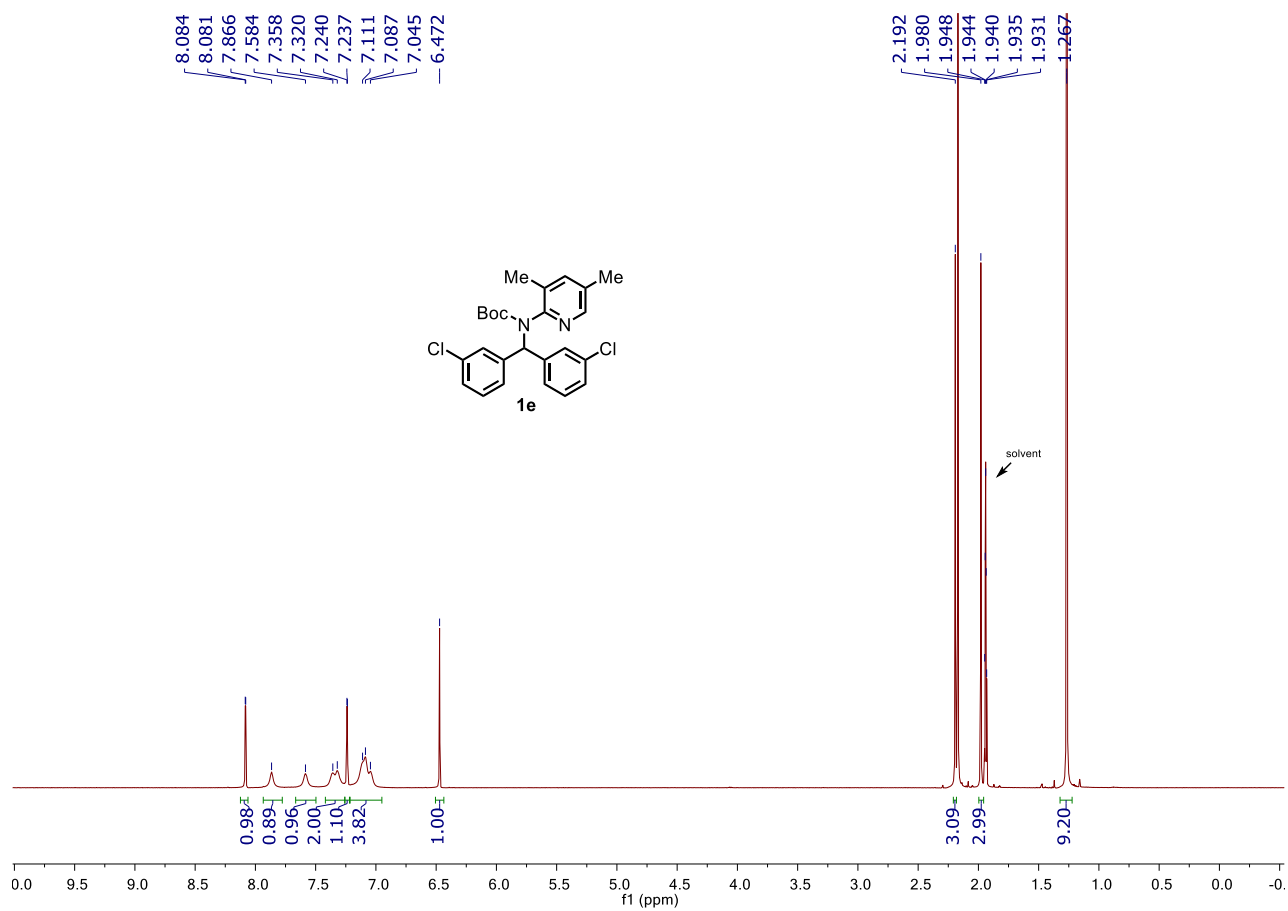

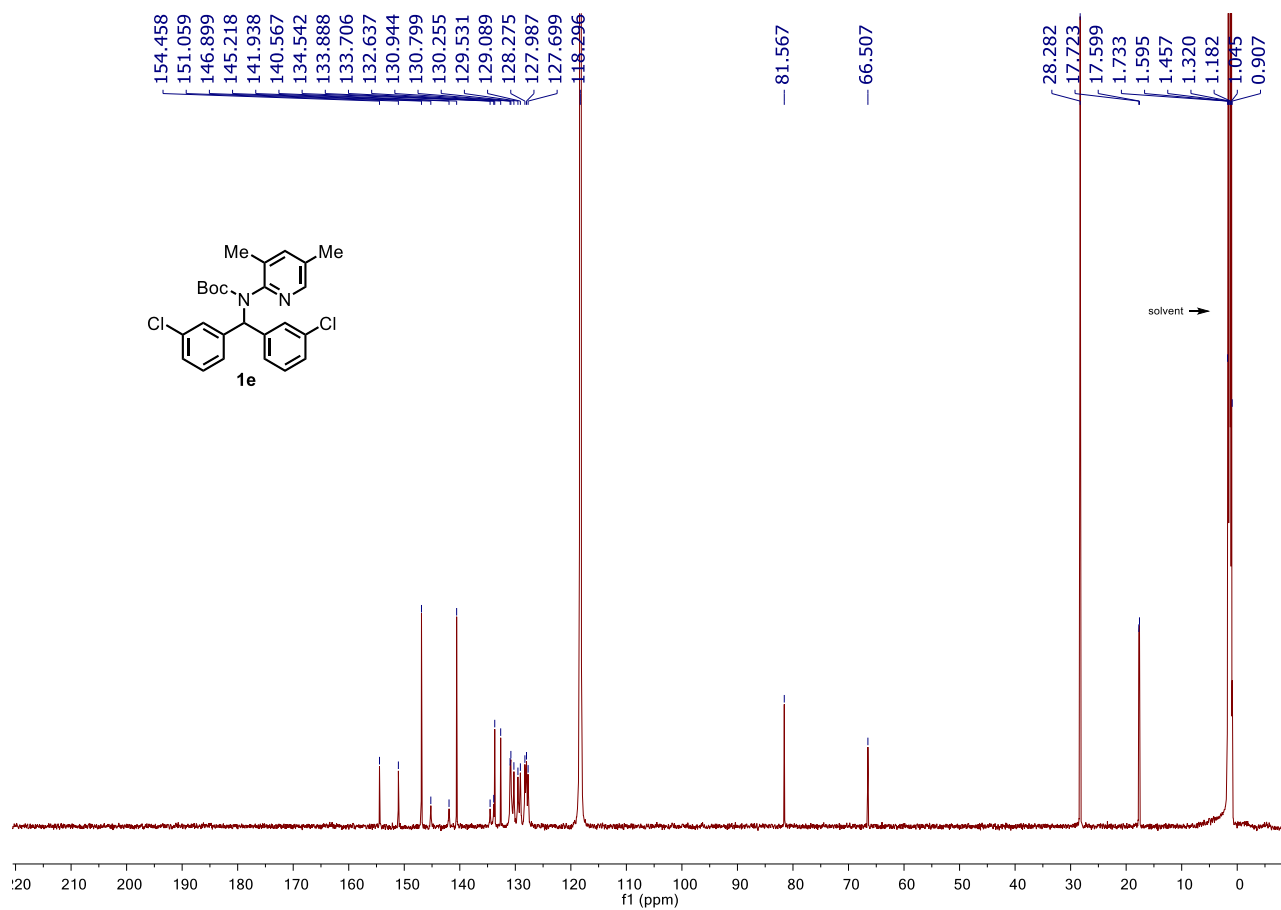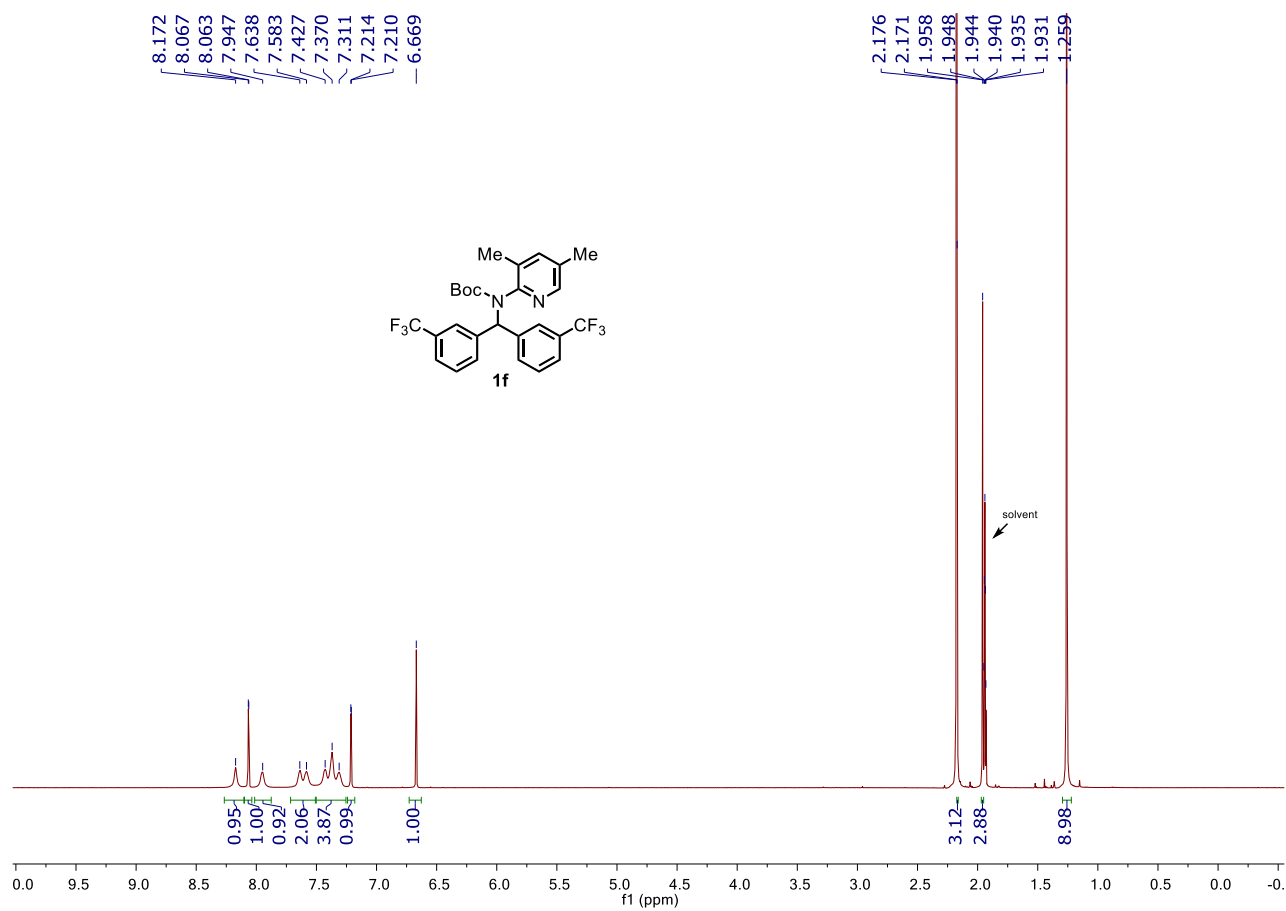

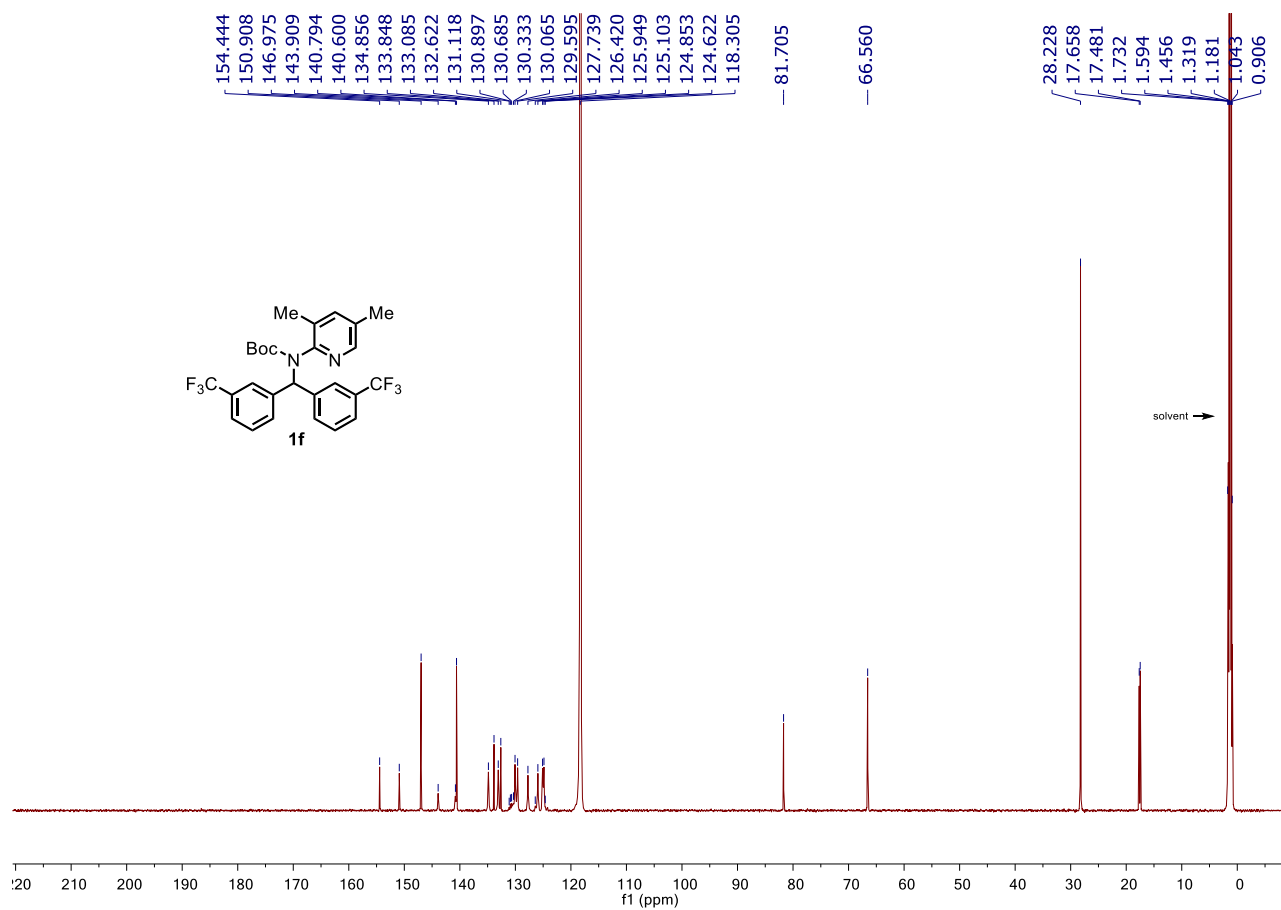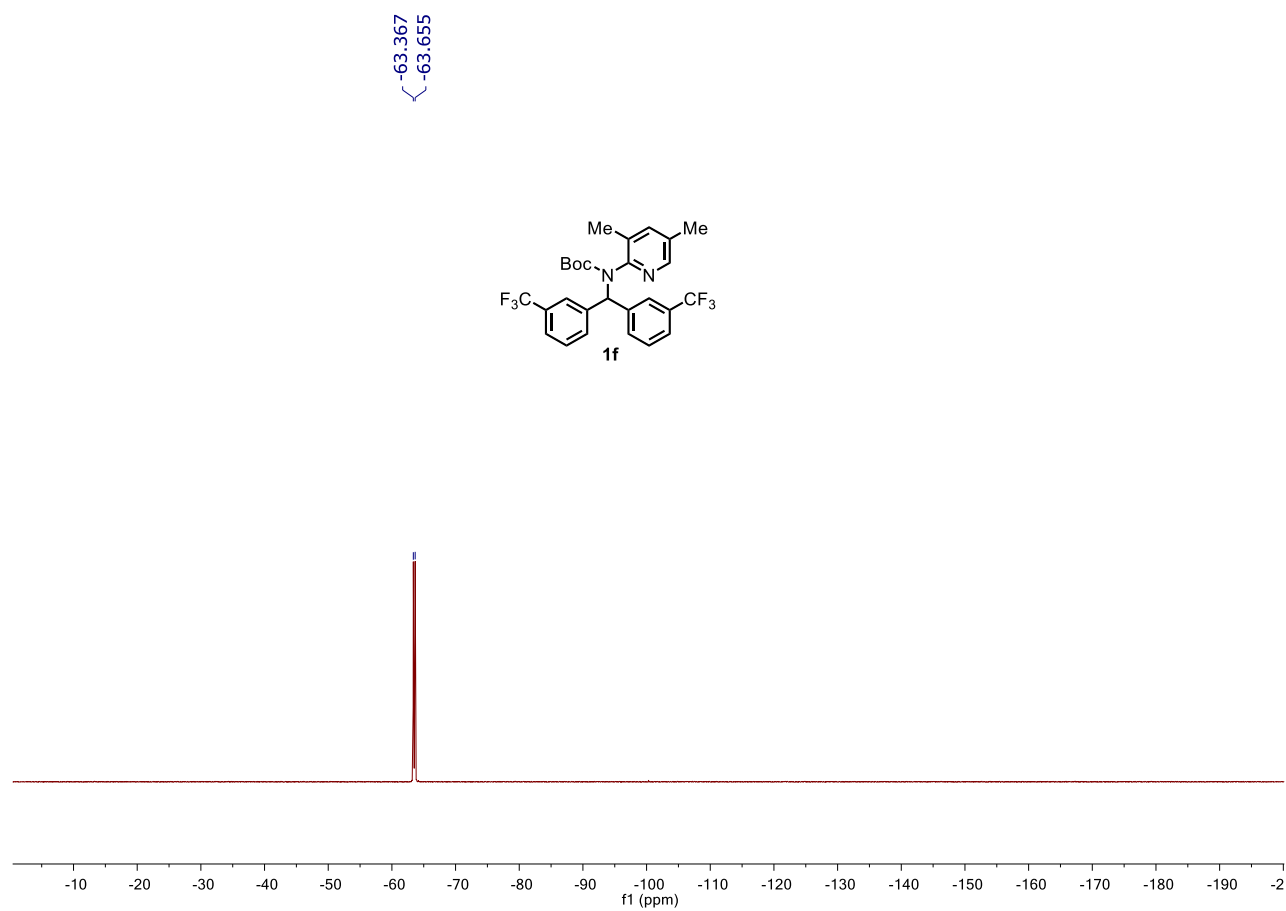

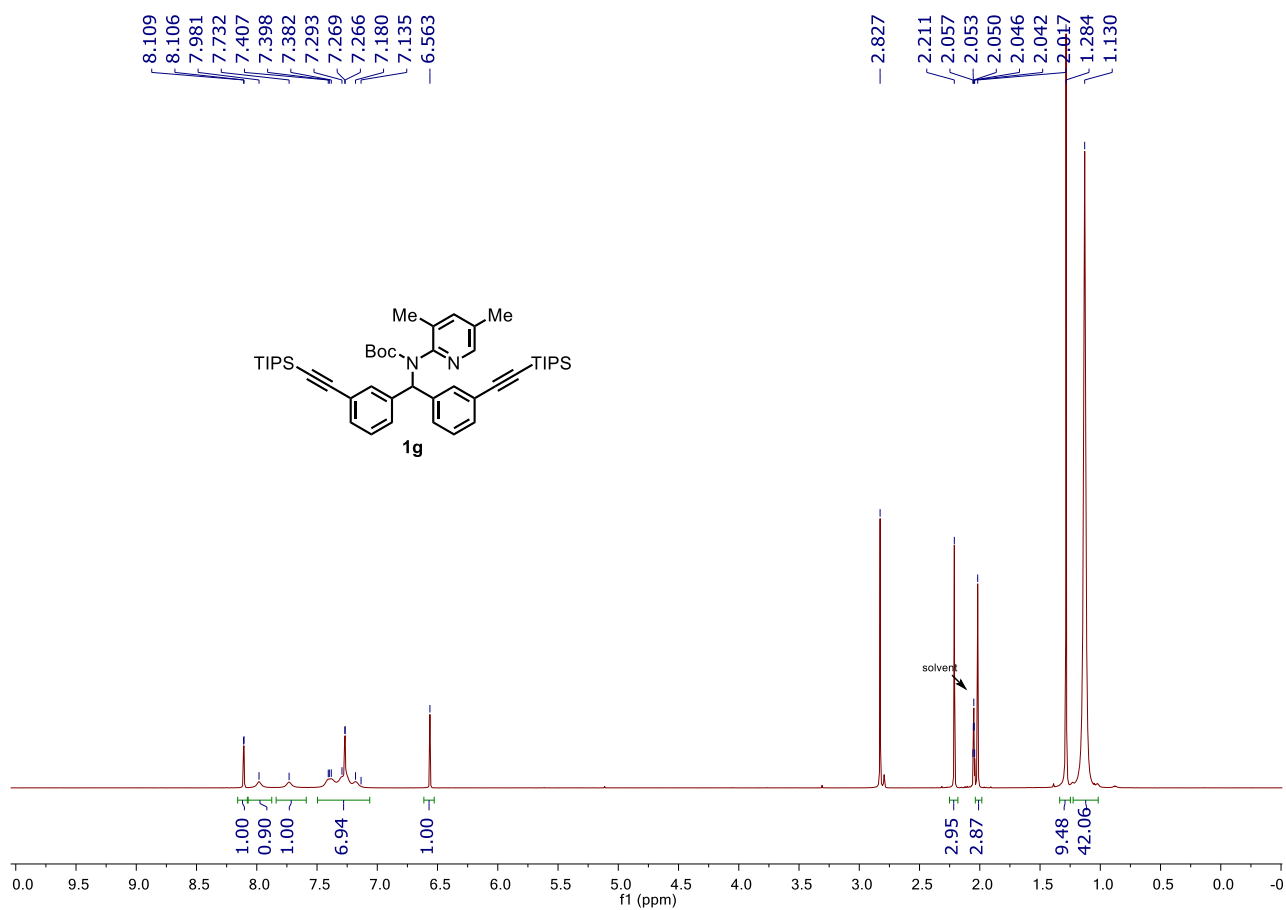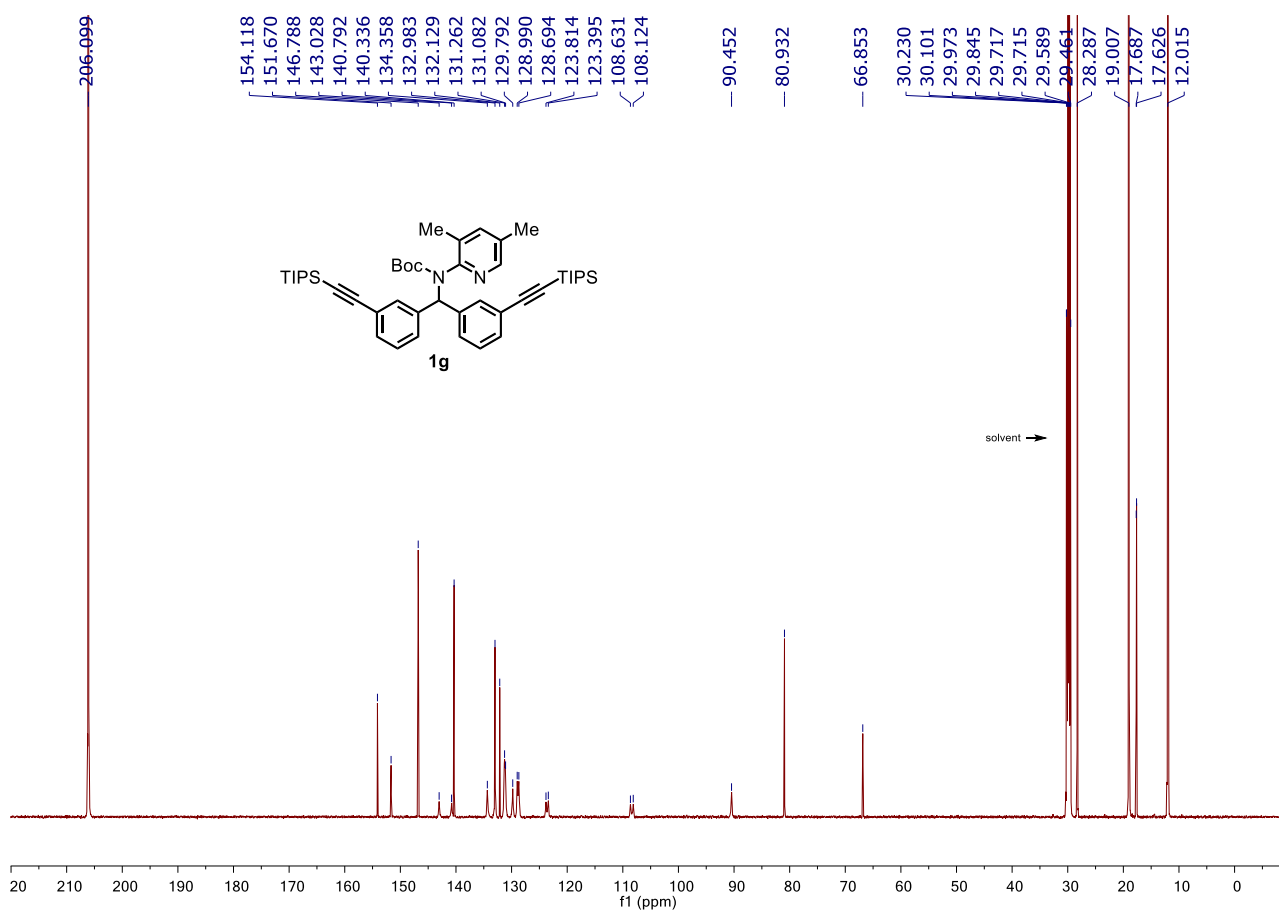

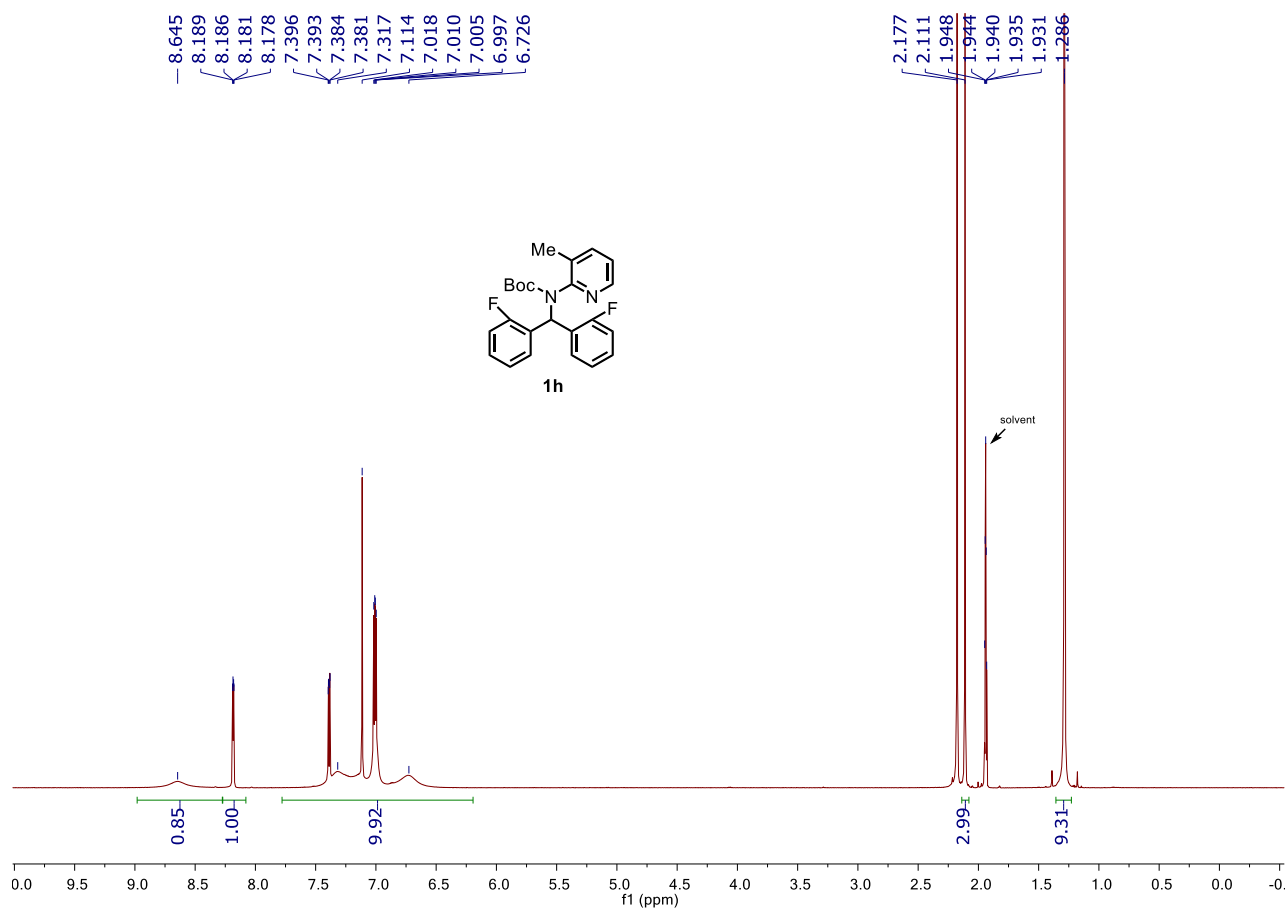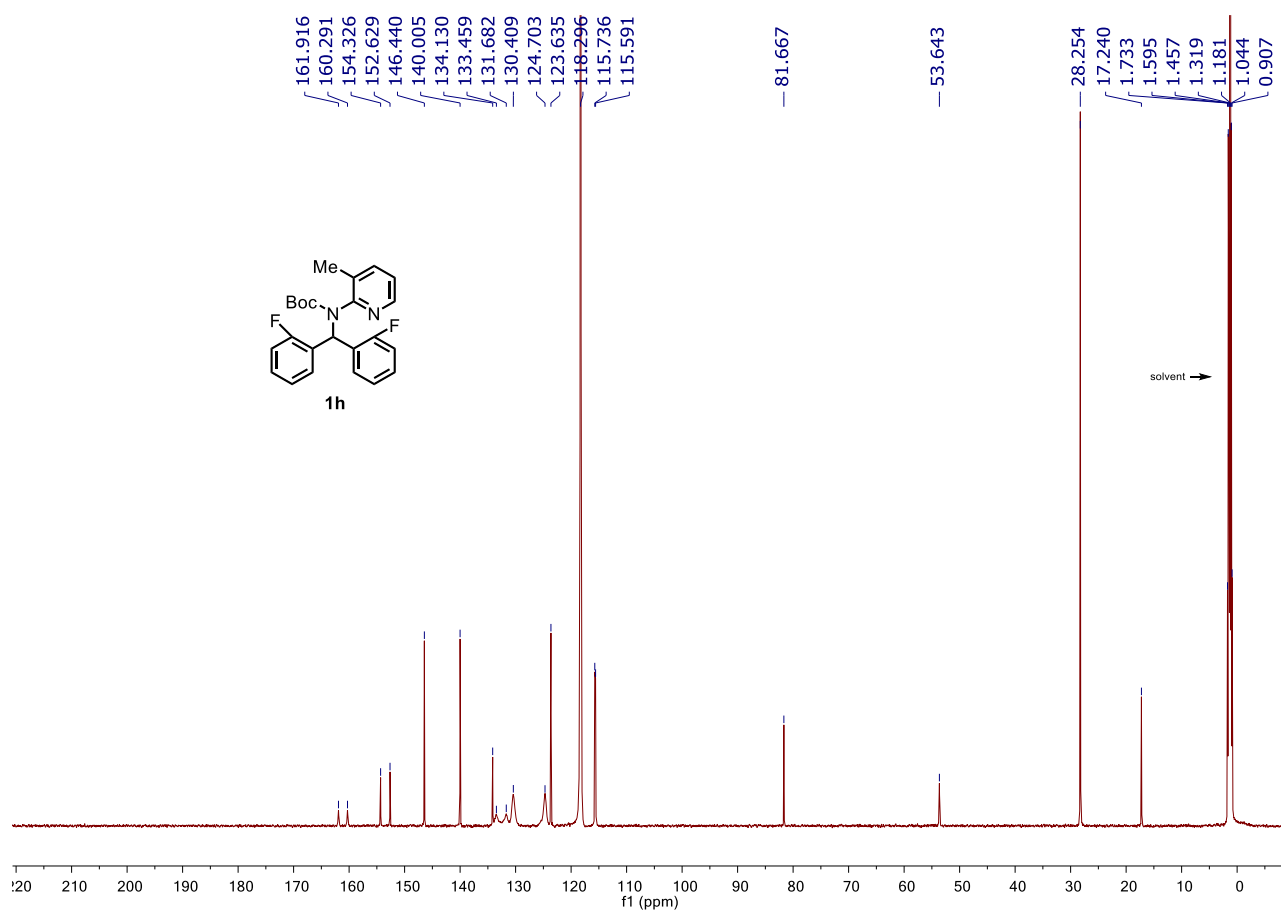

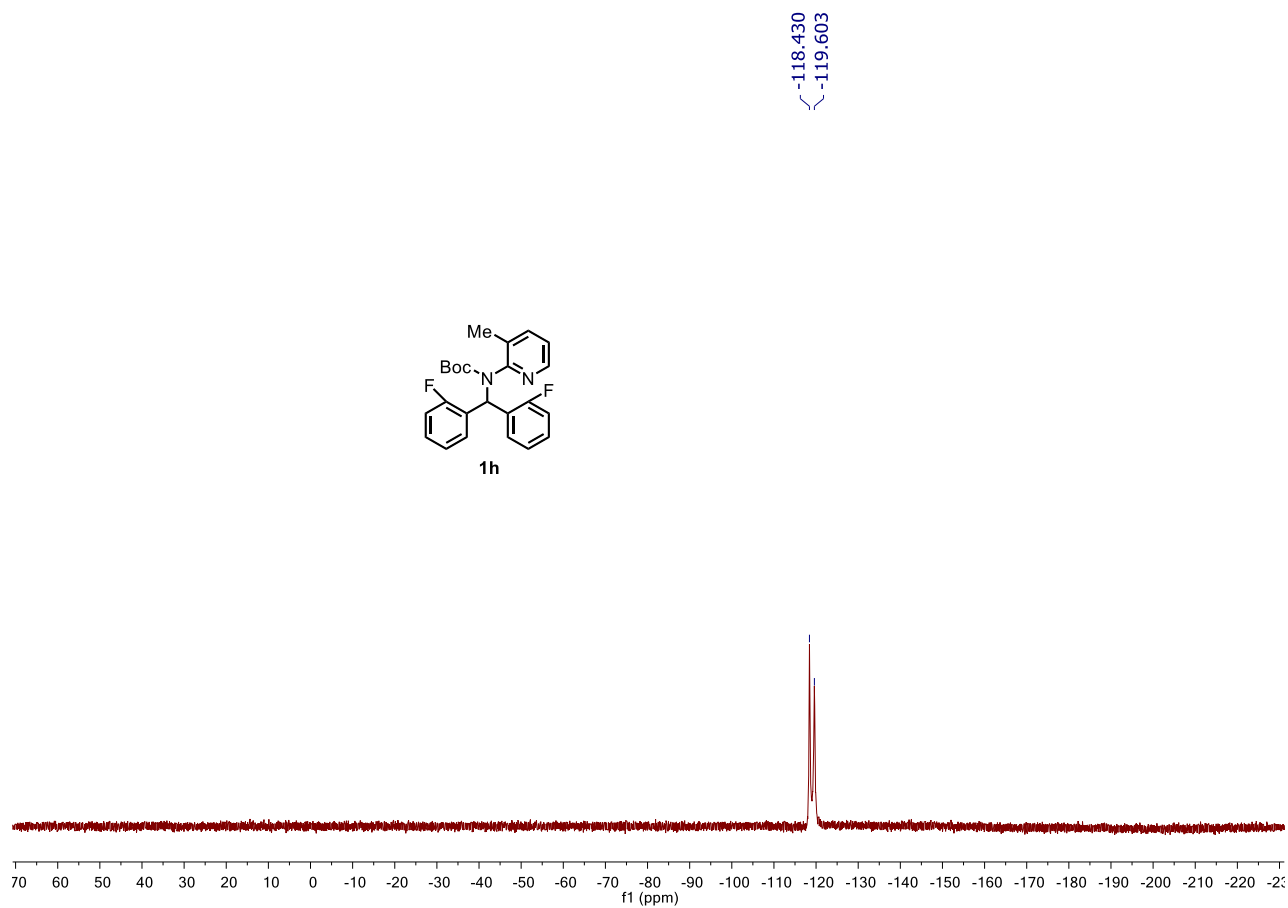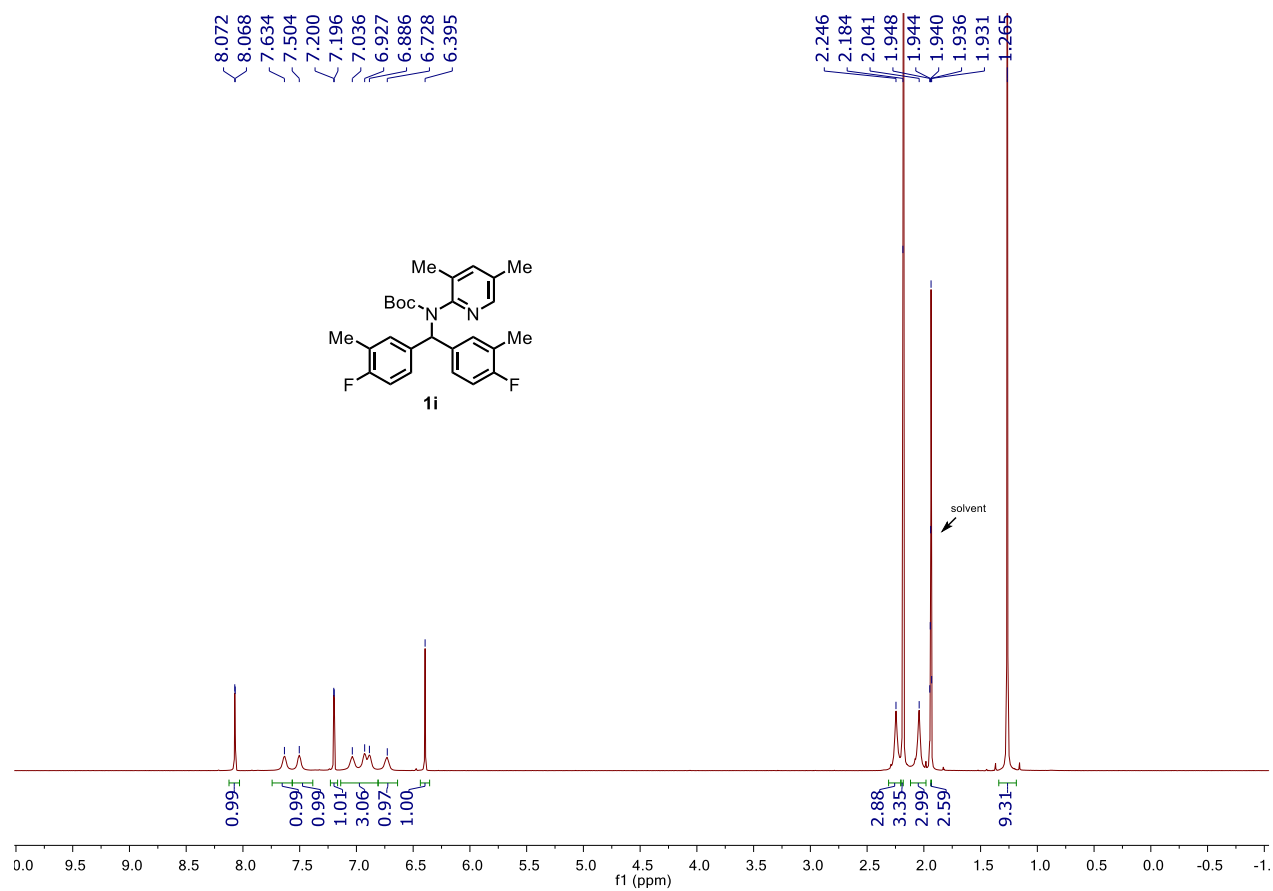

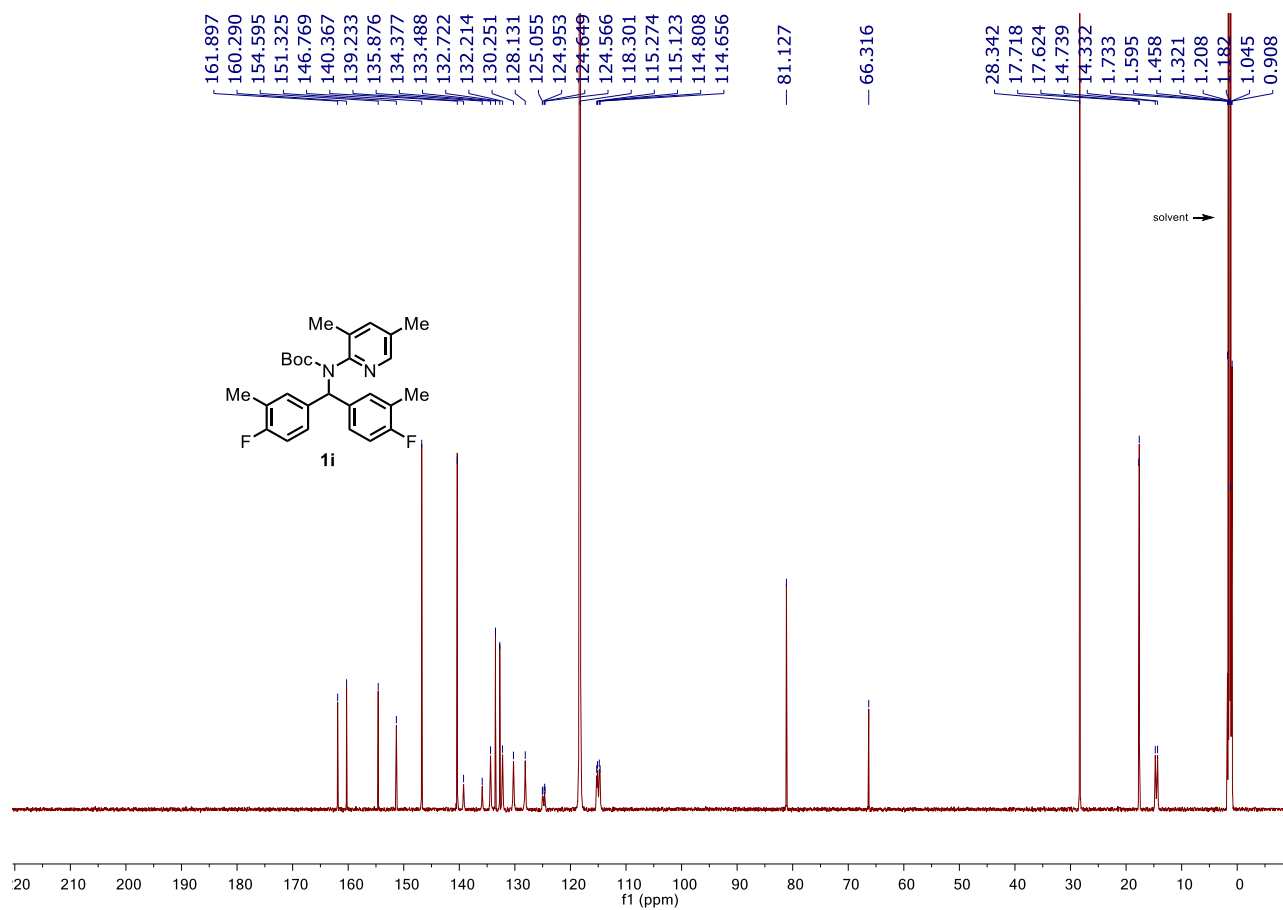

-121.404  
-122.729

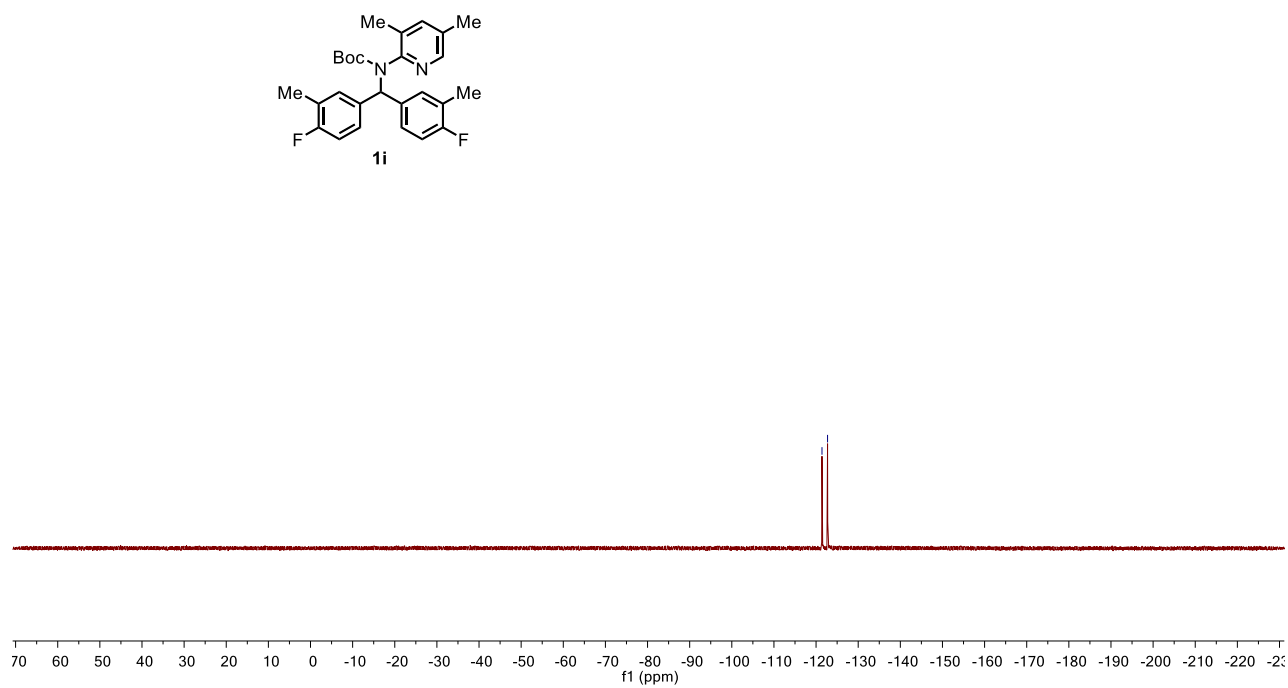

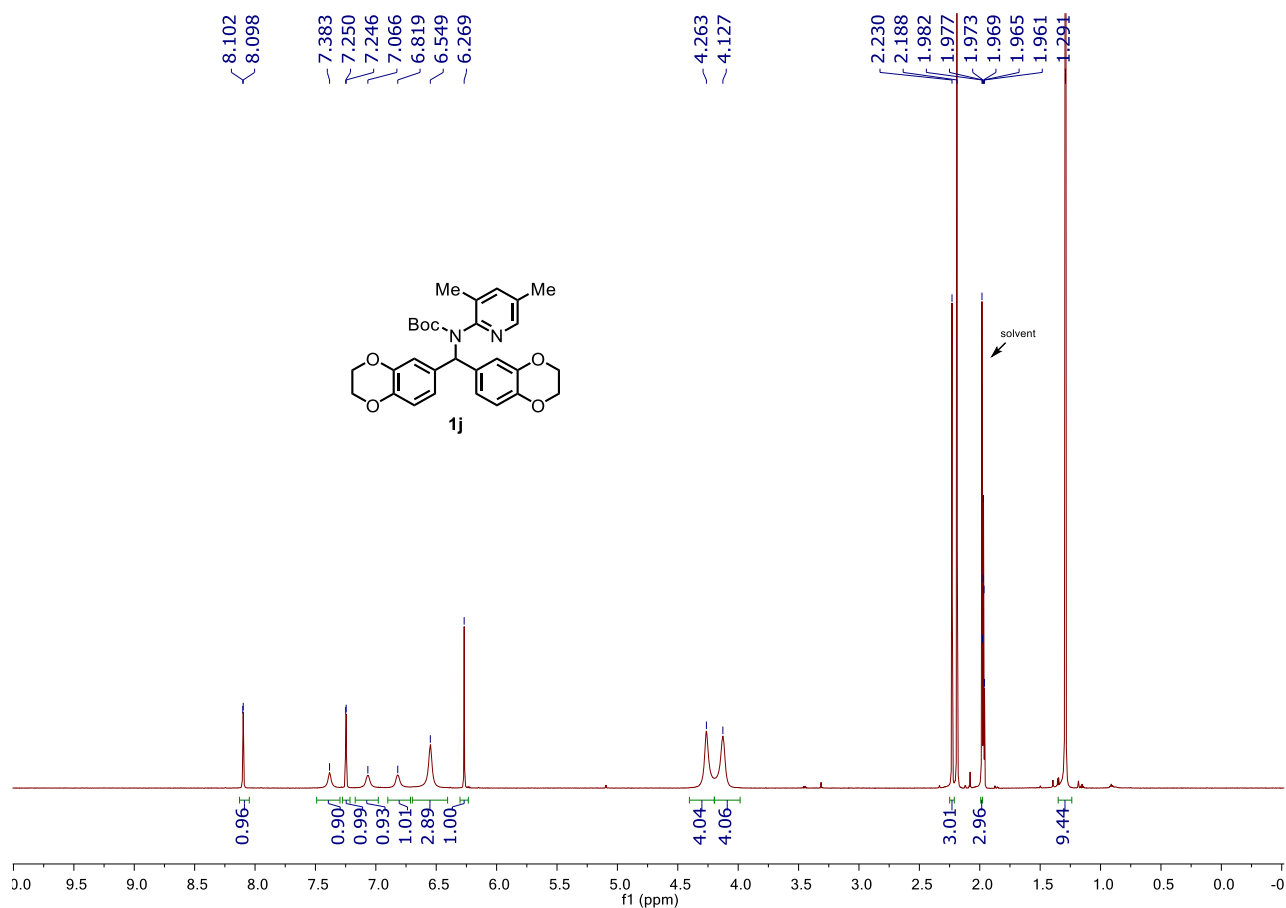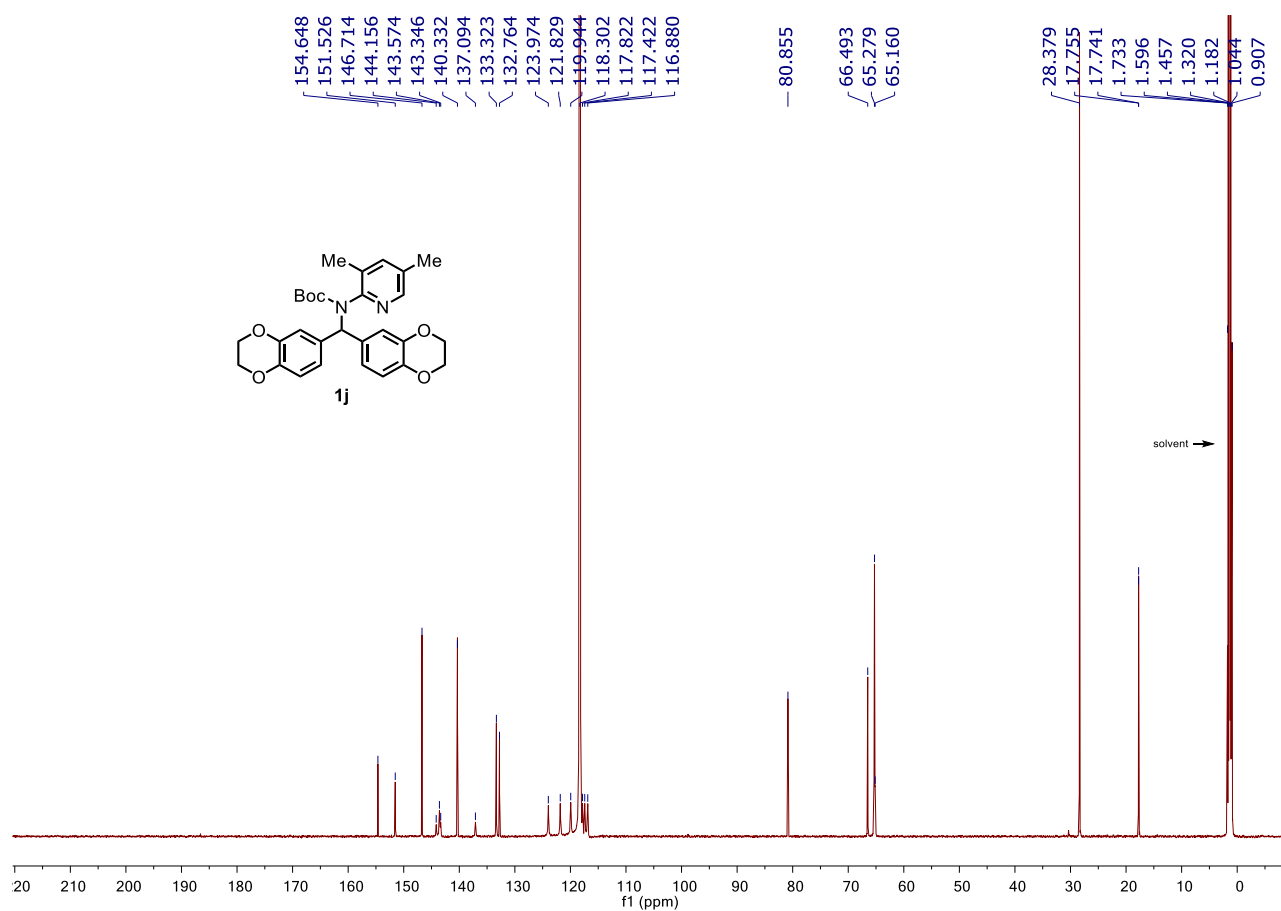



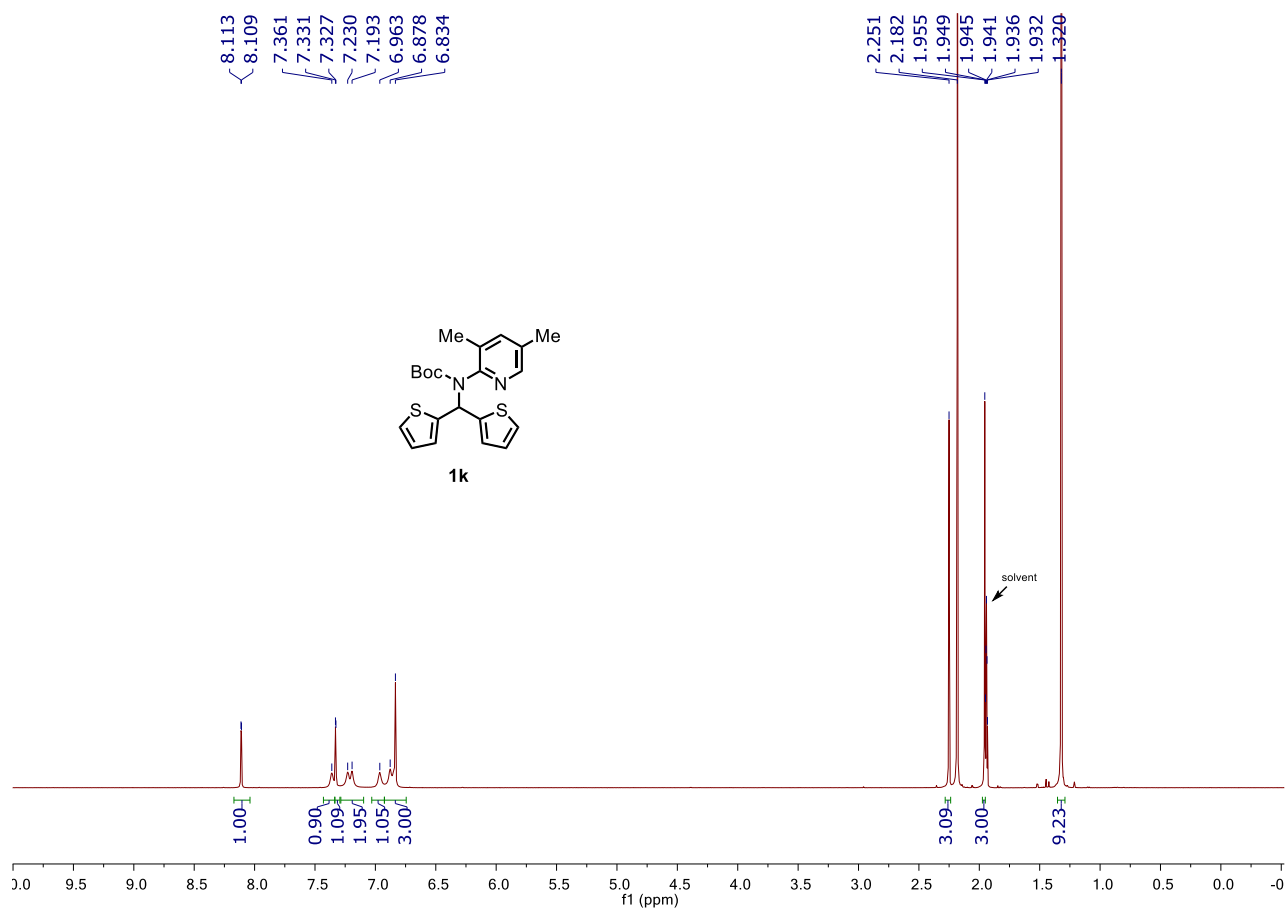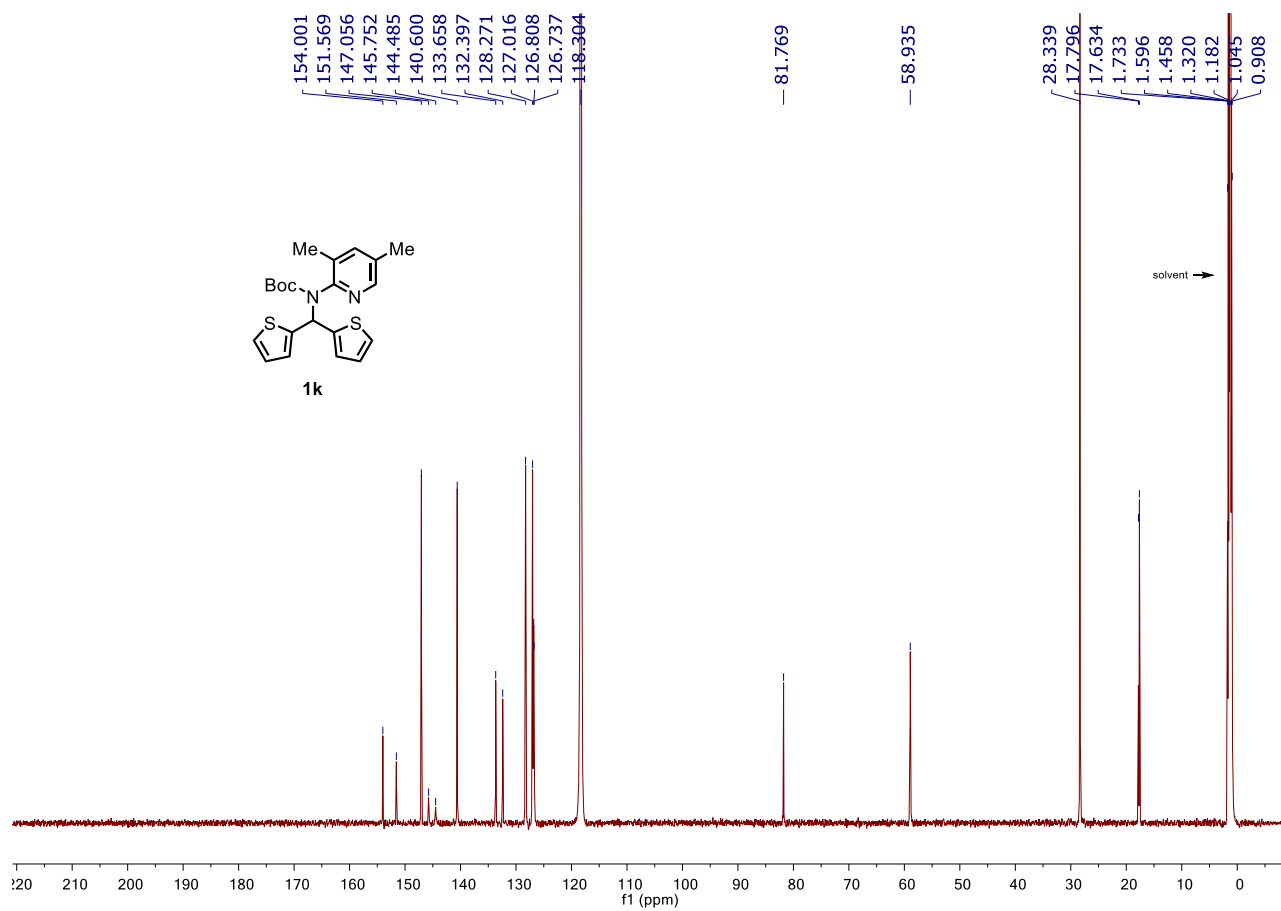

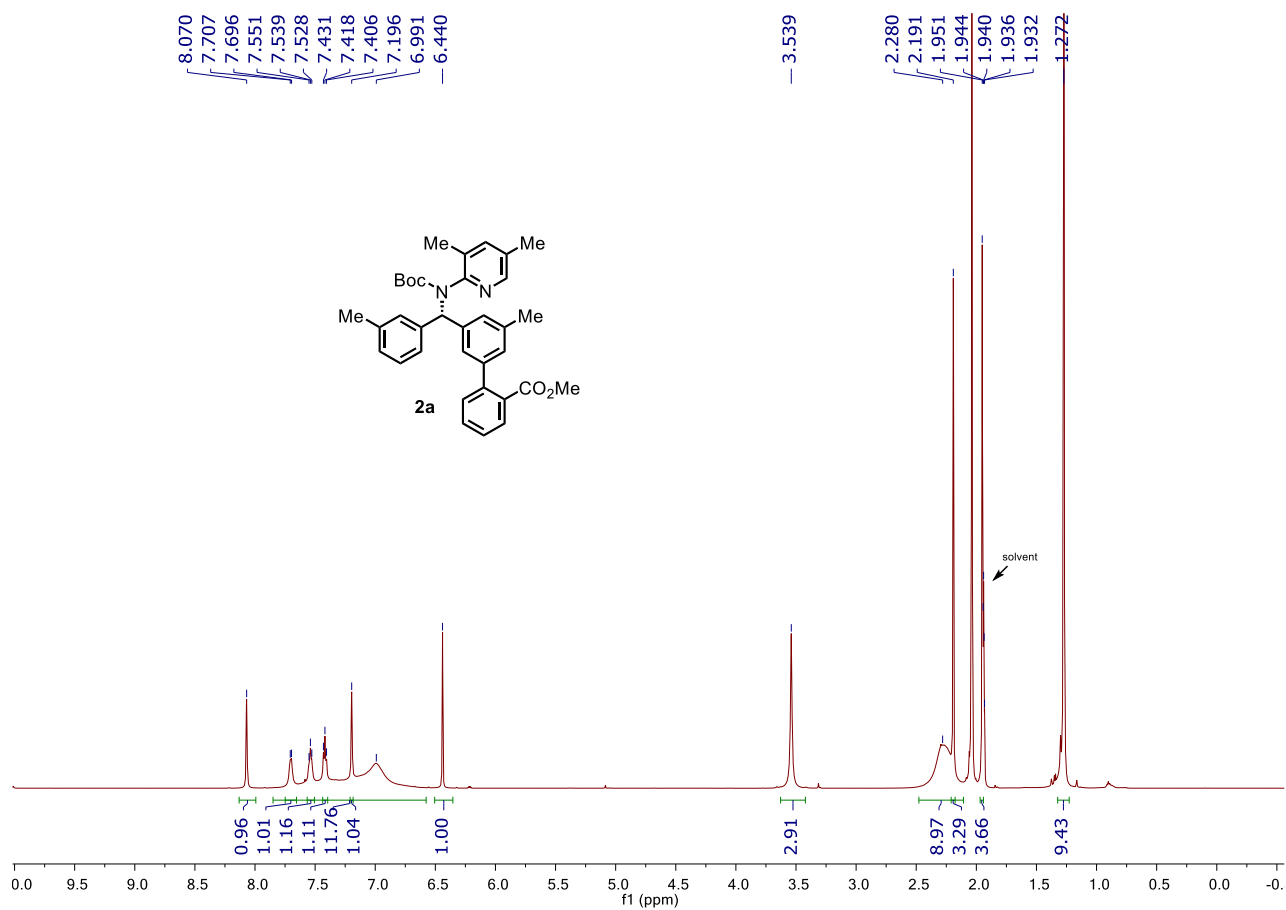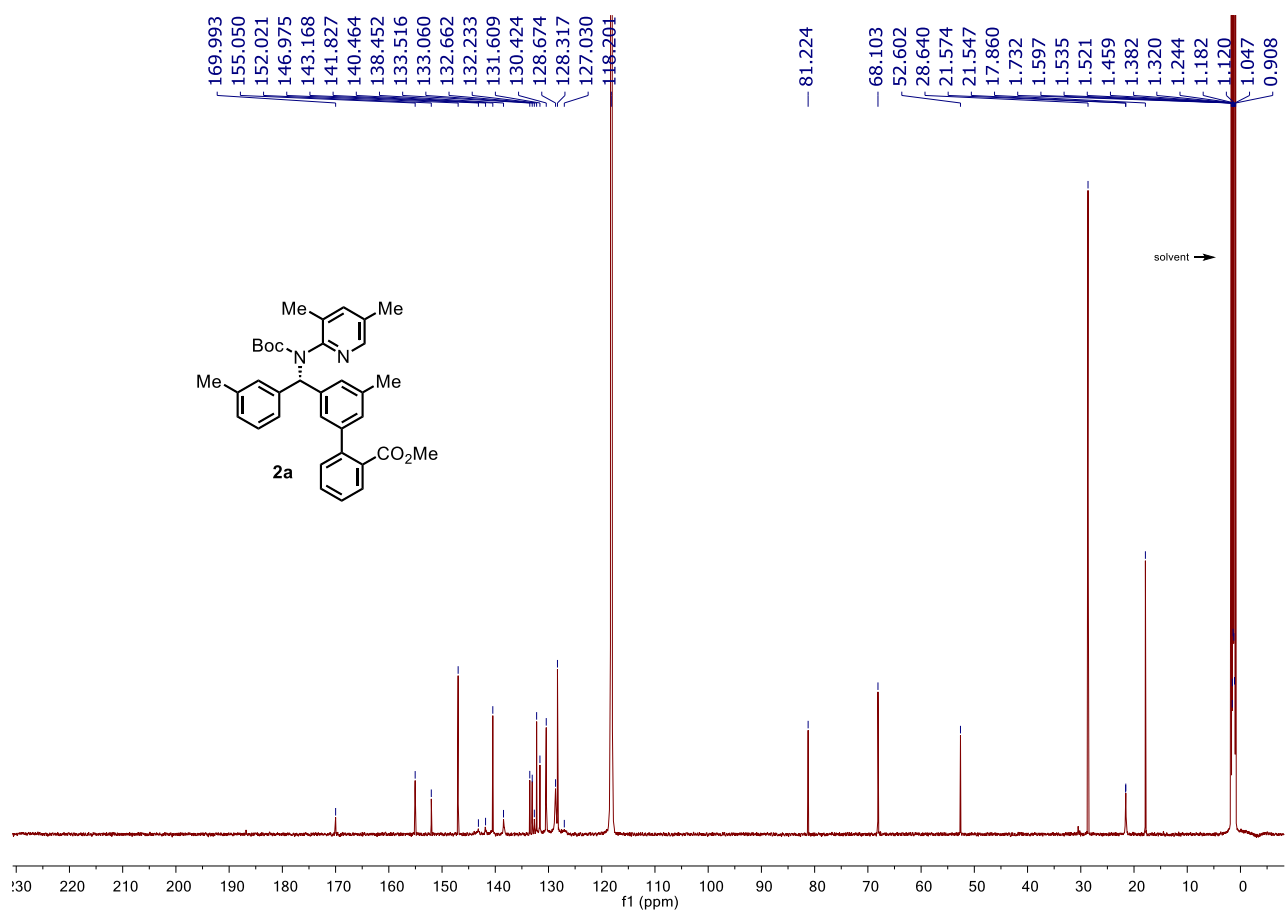

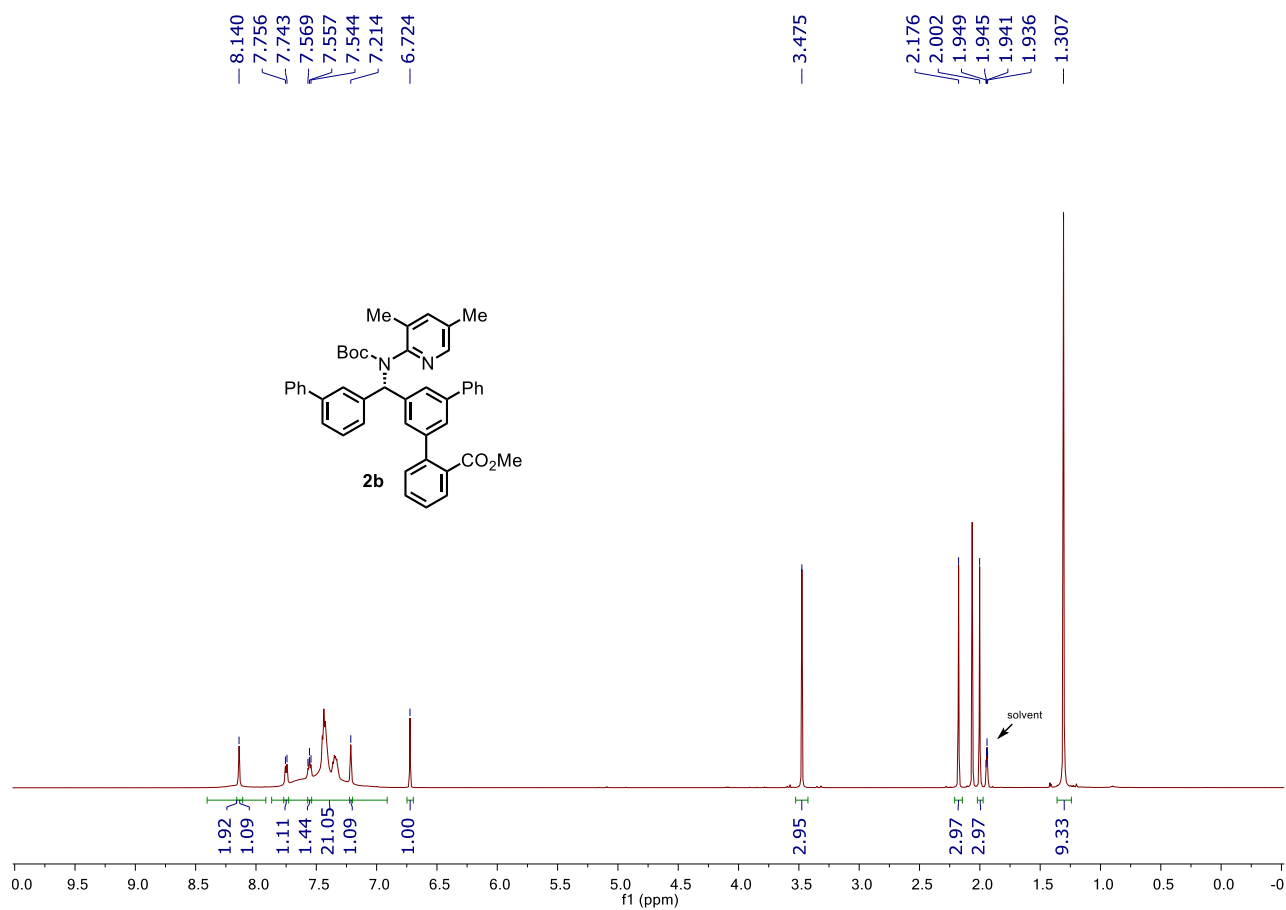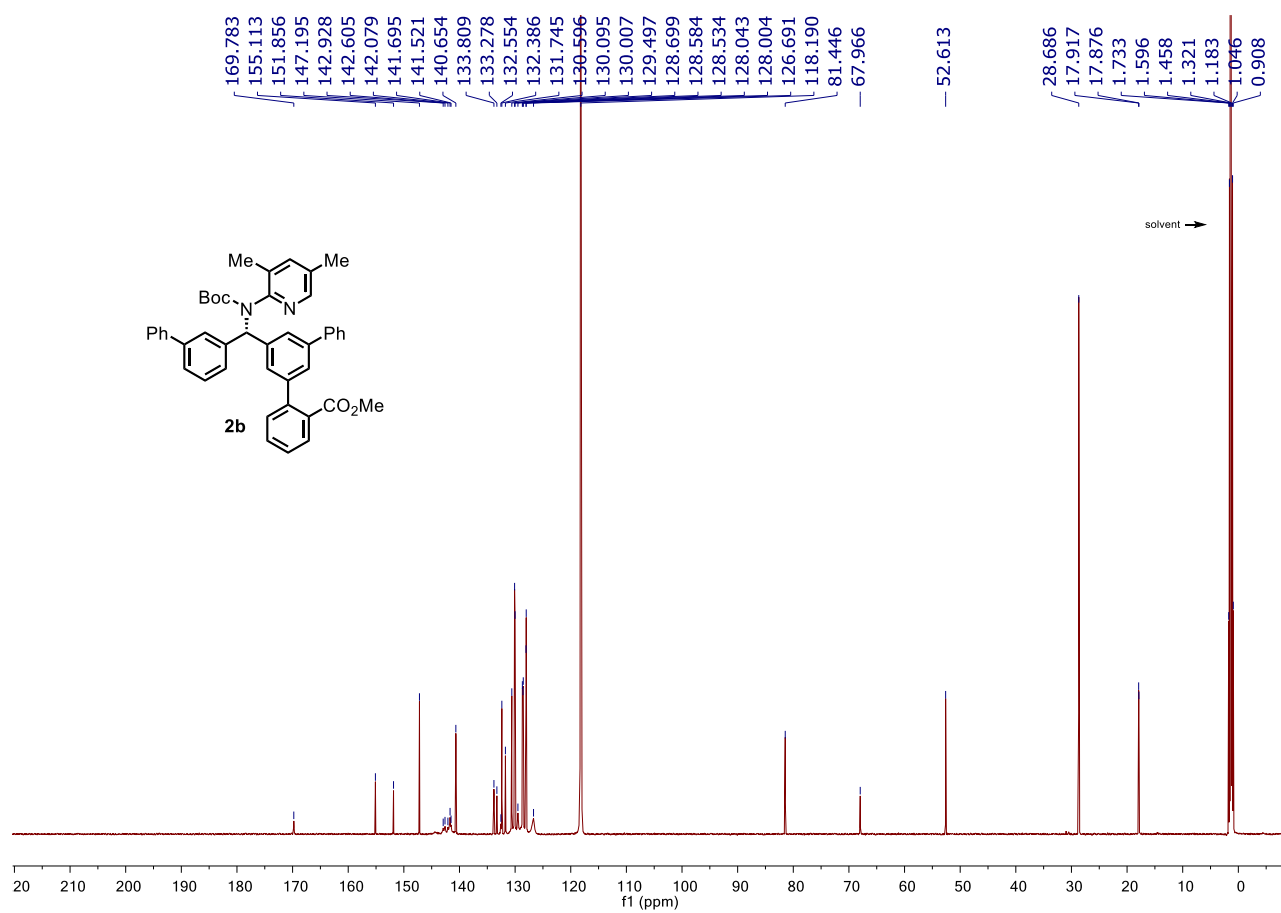

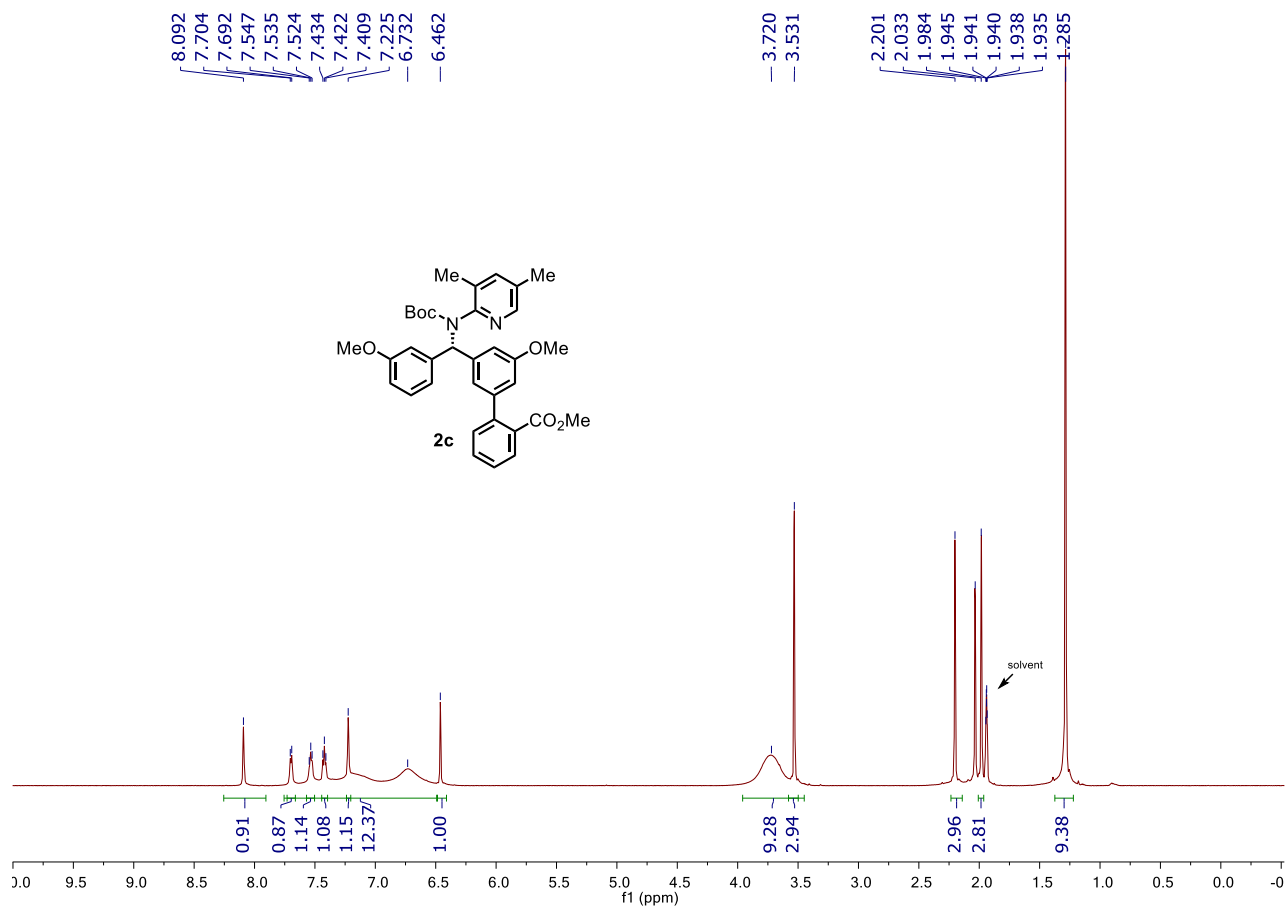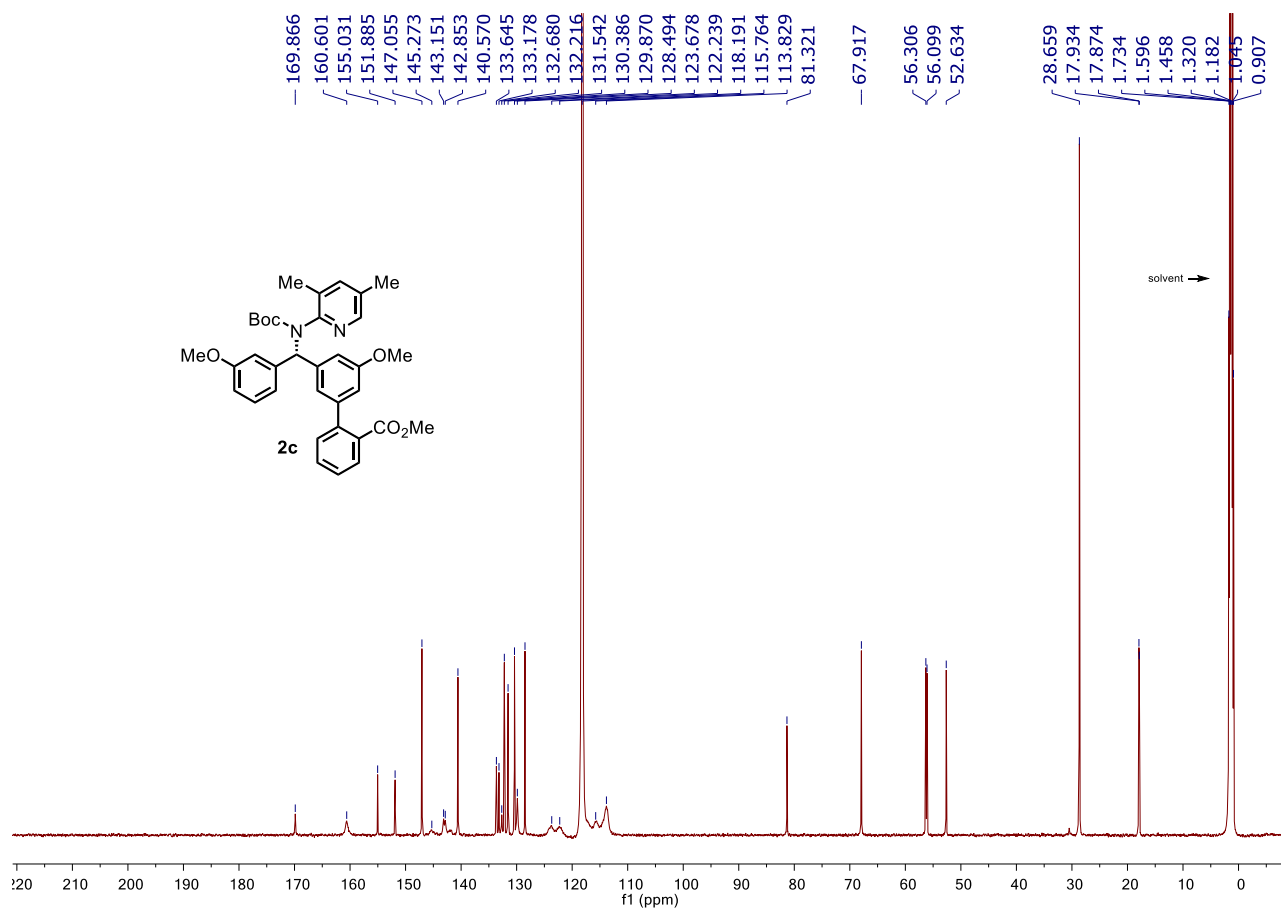

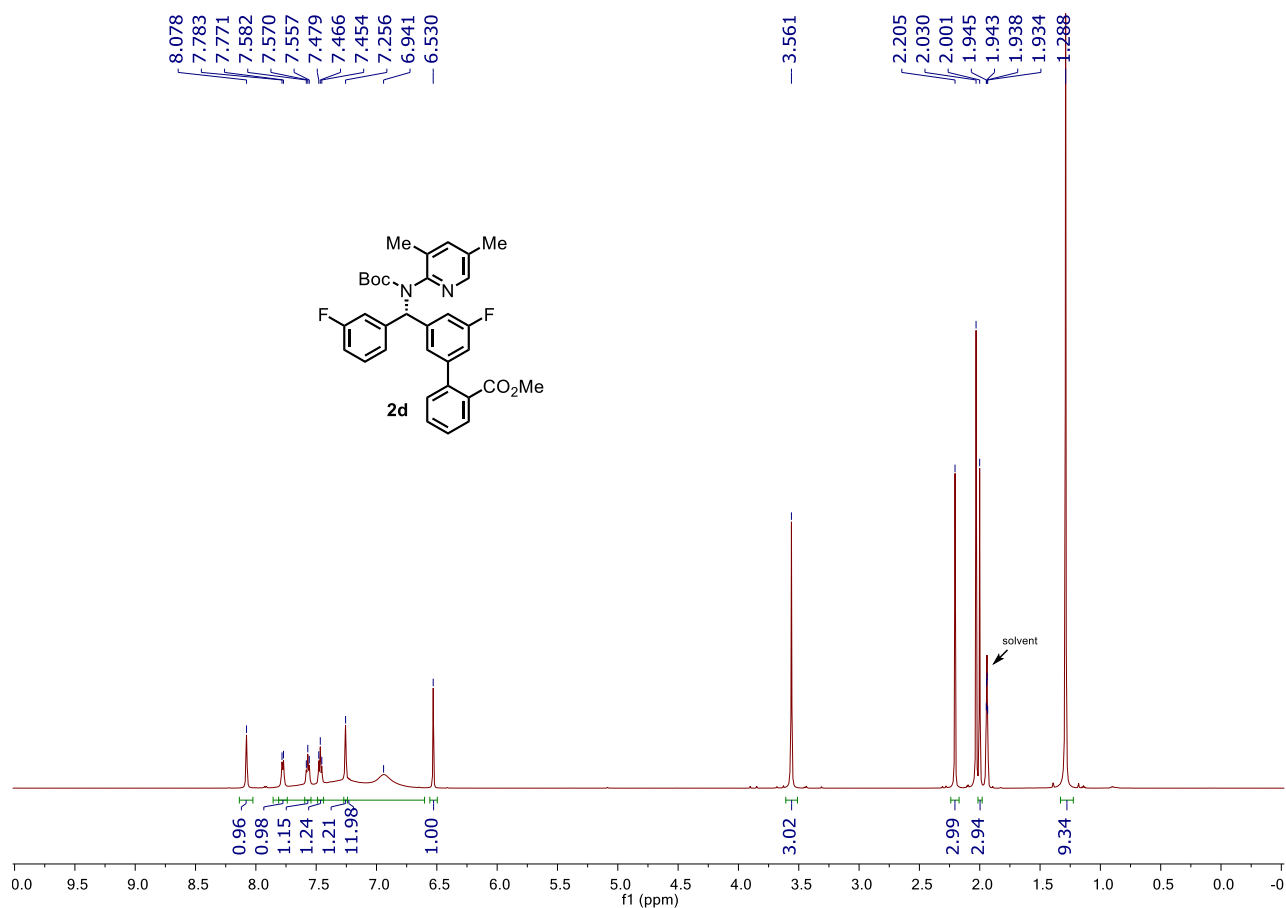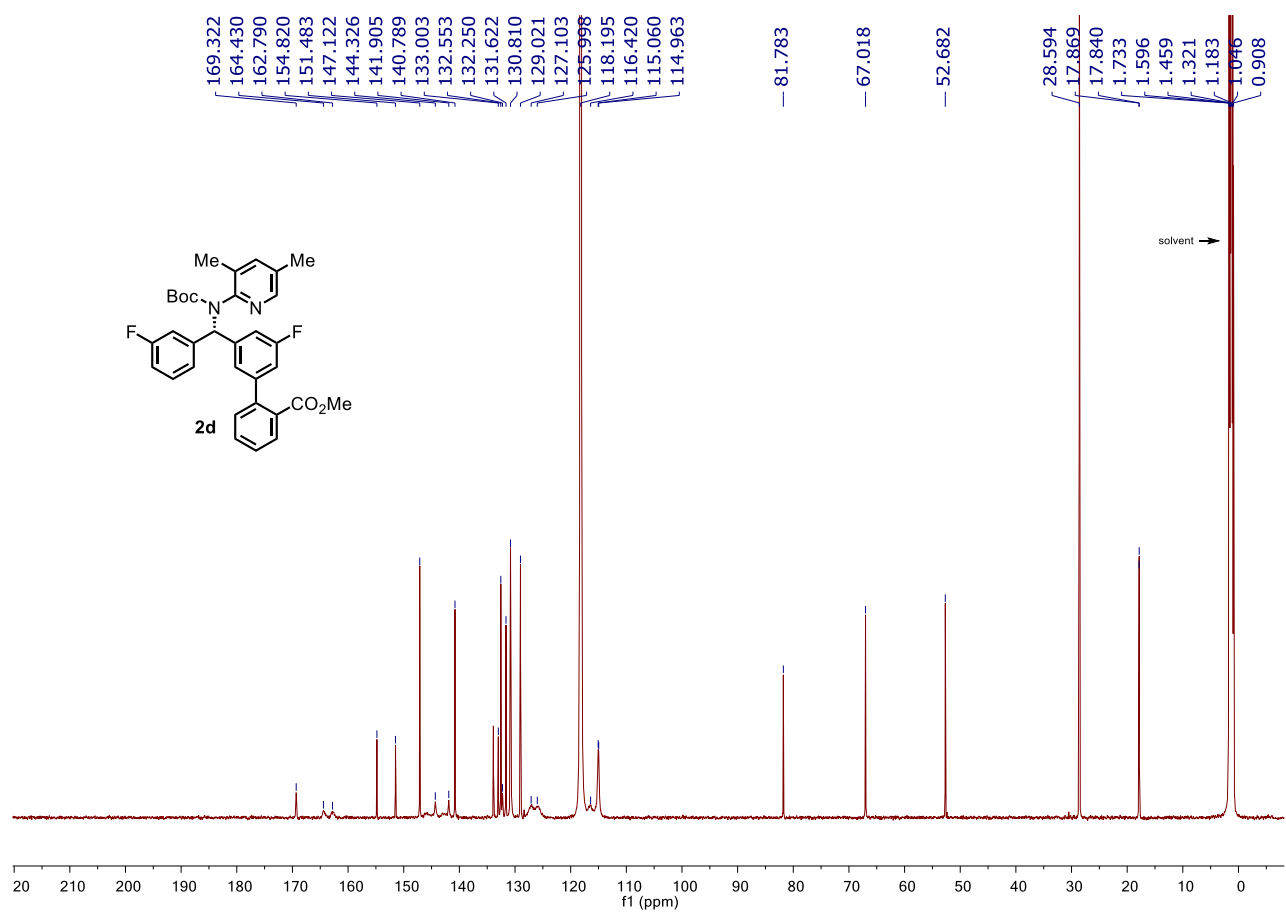

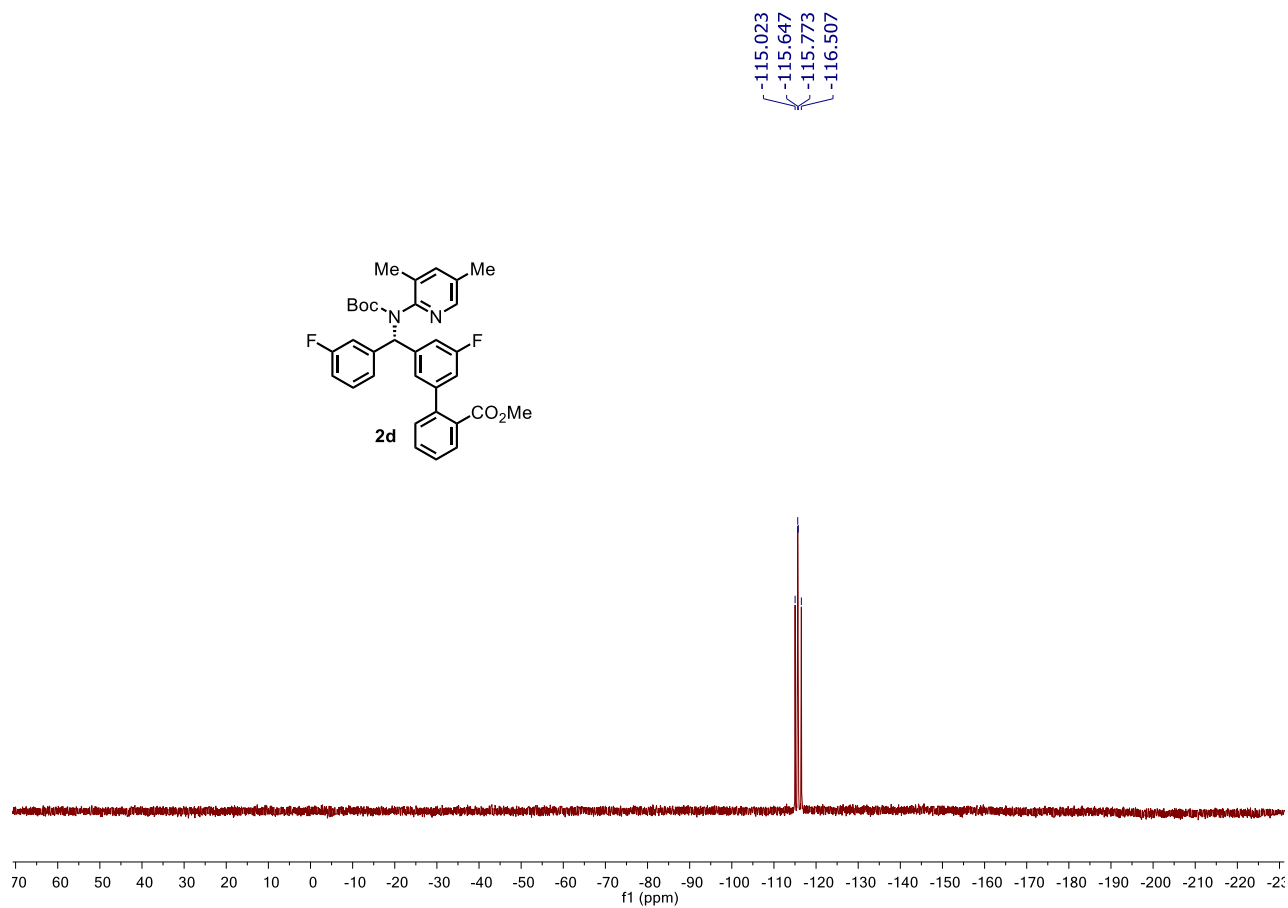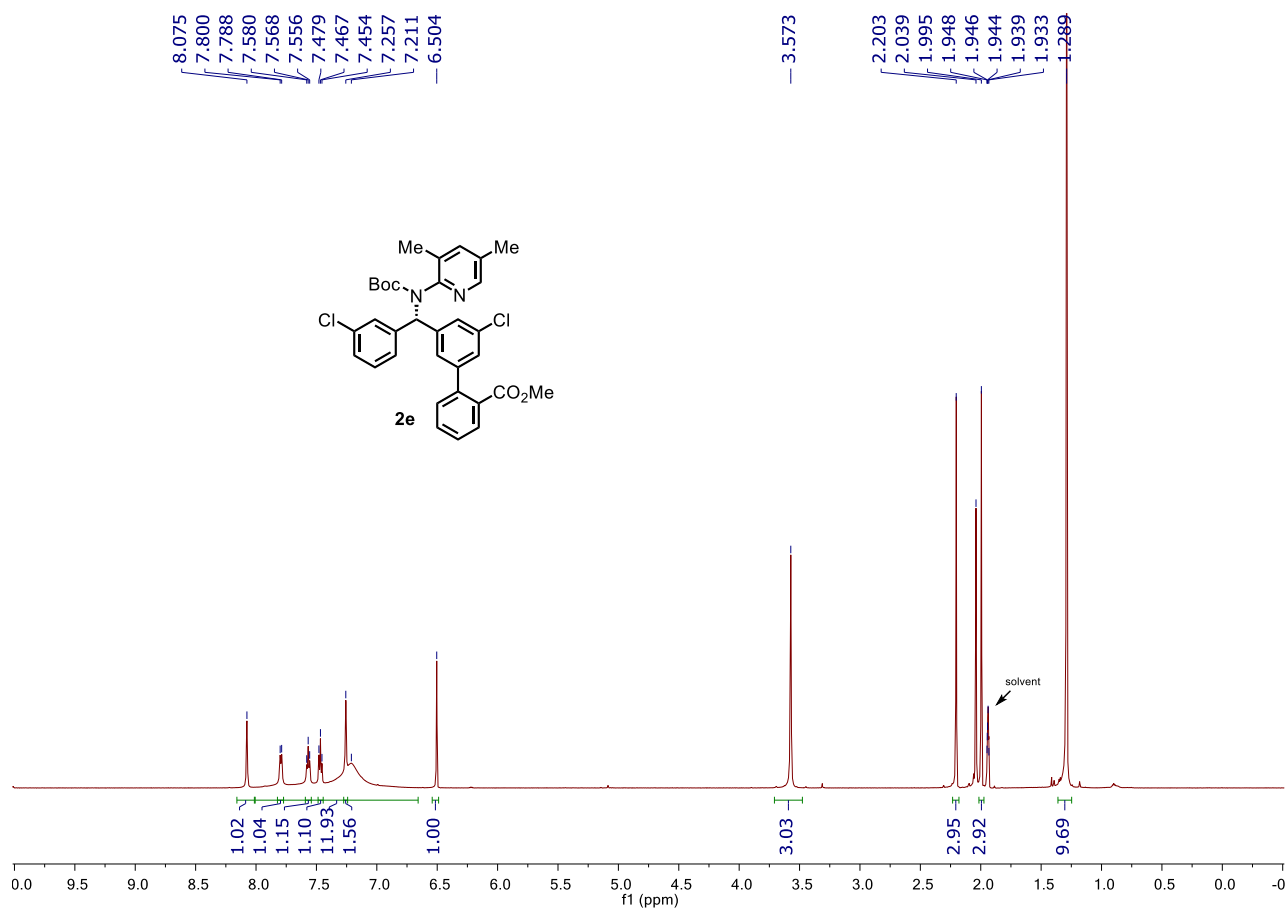

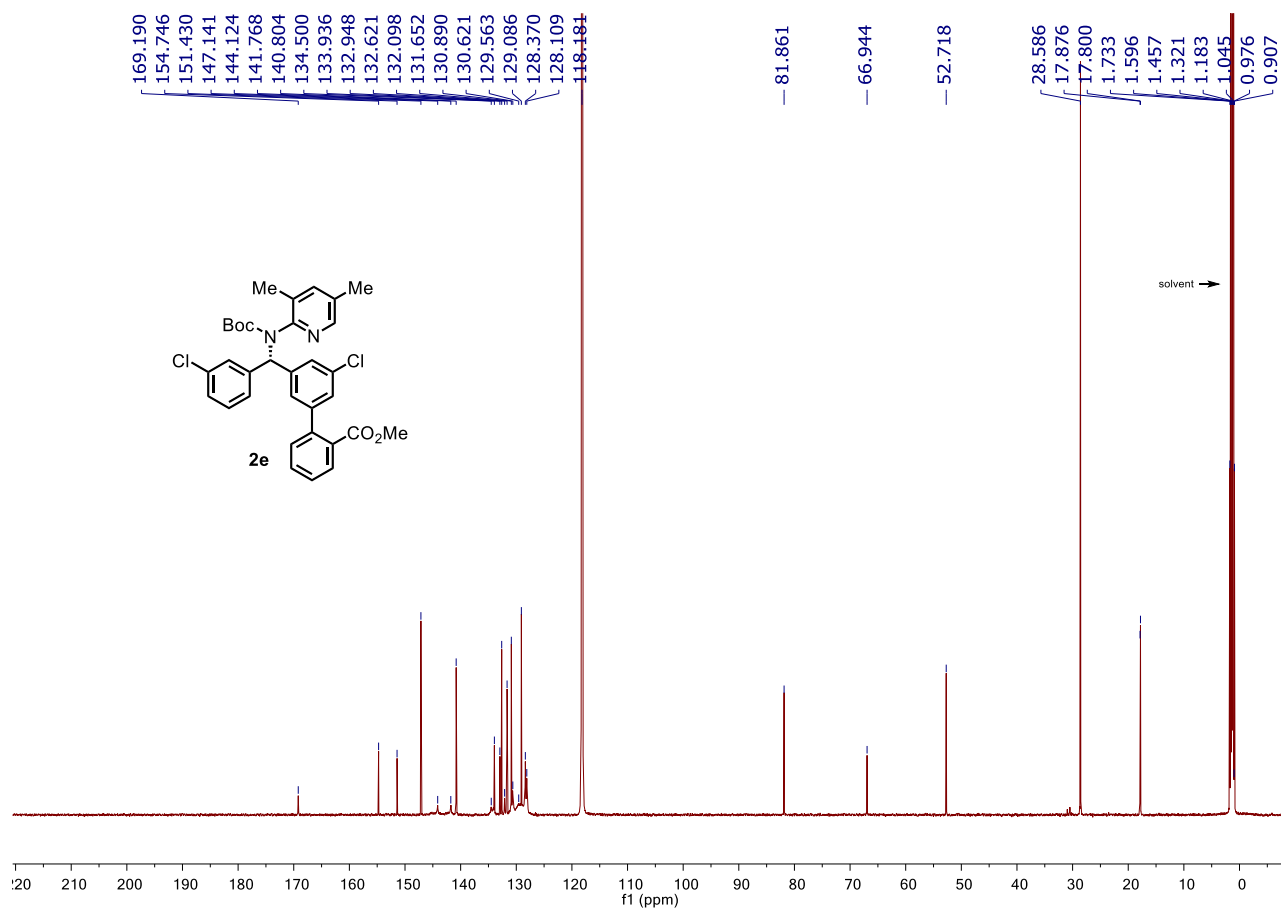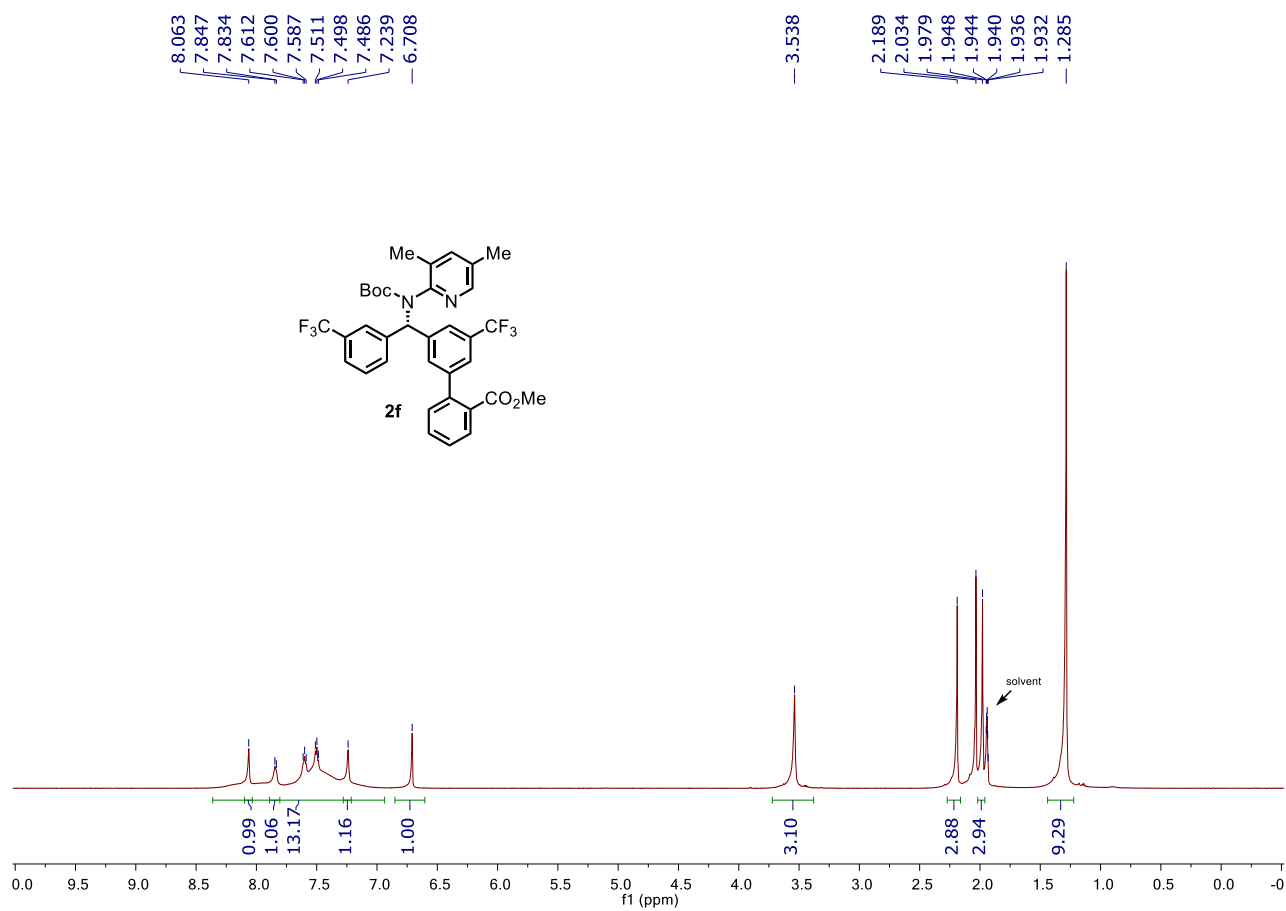

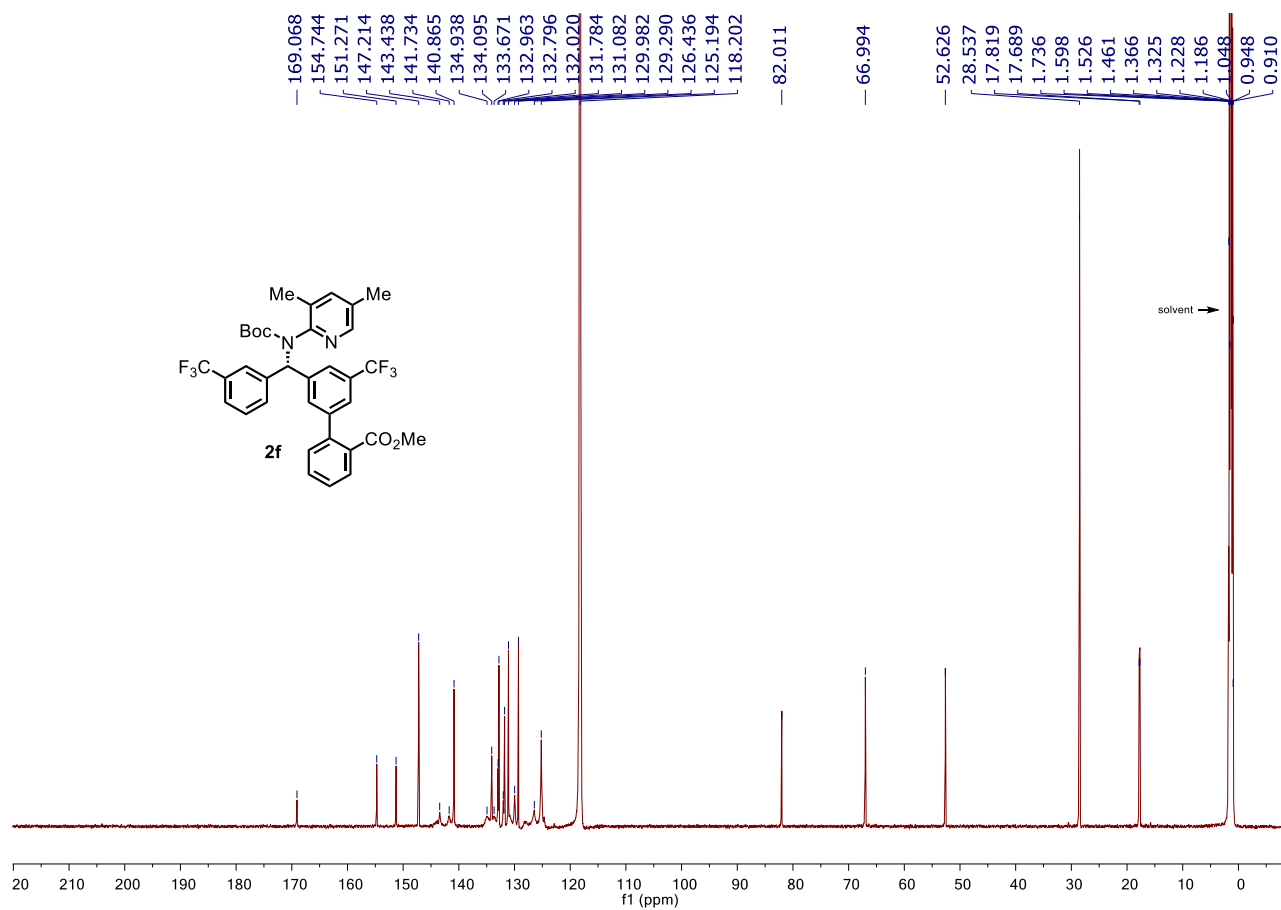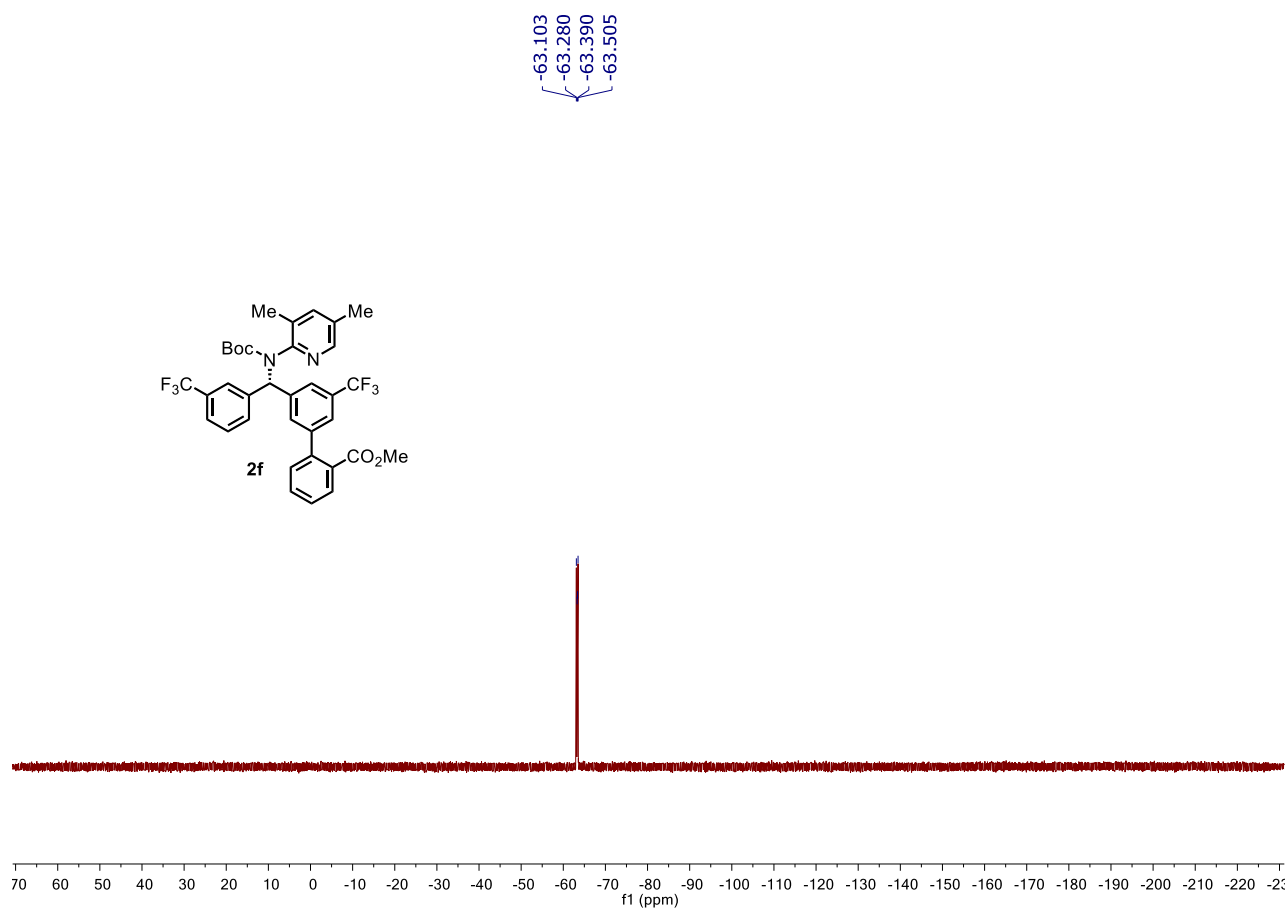



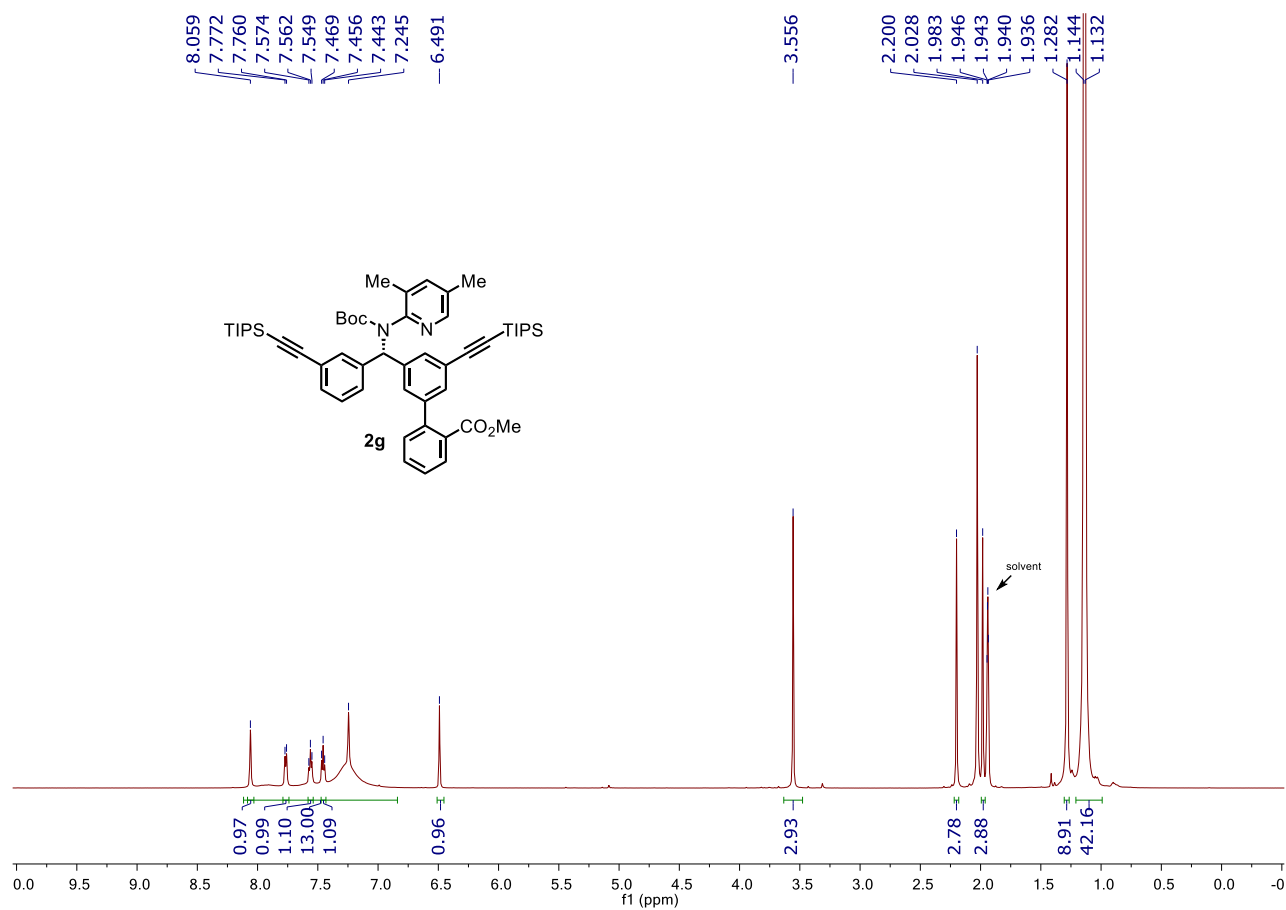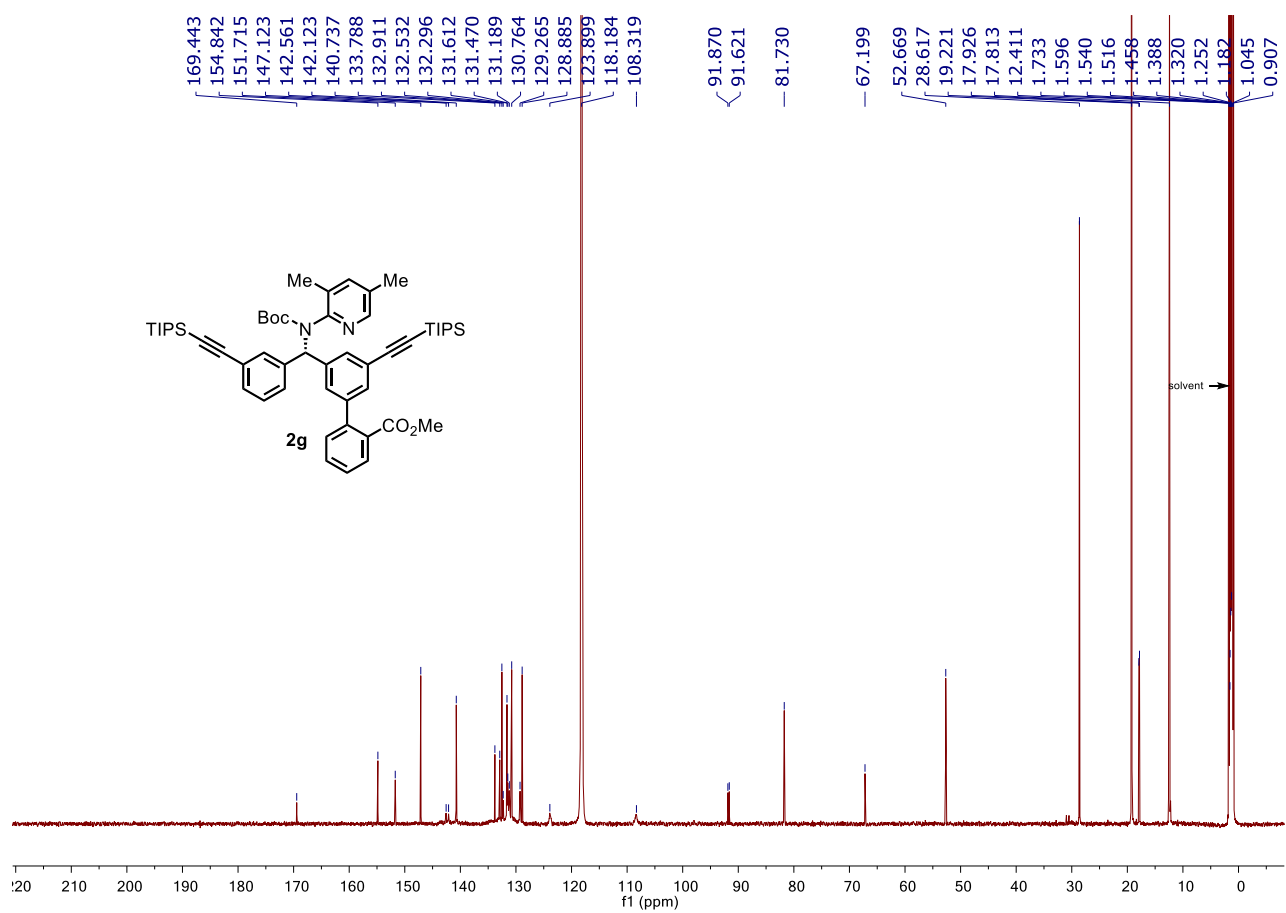

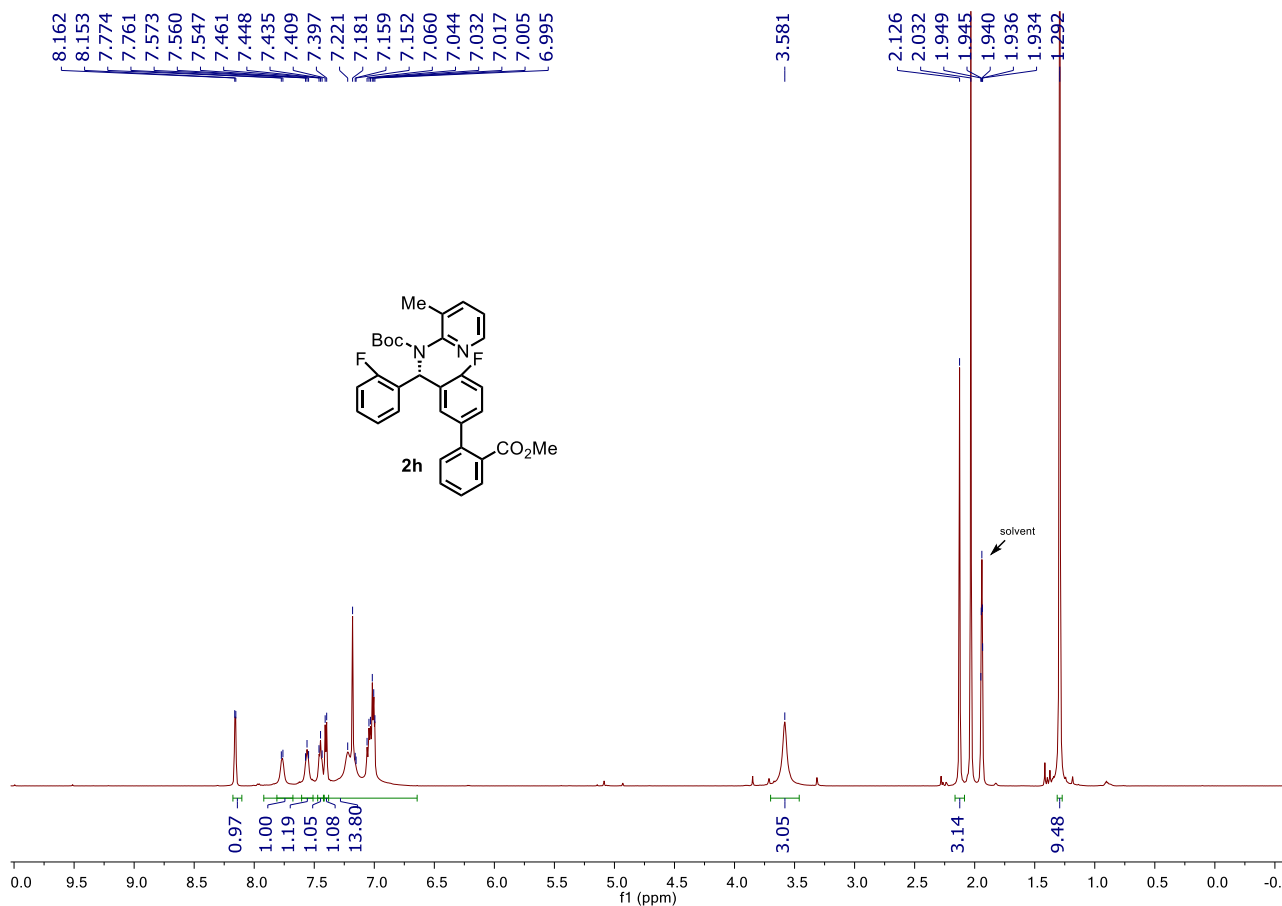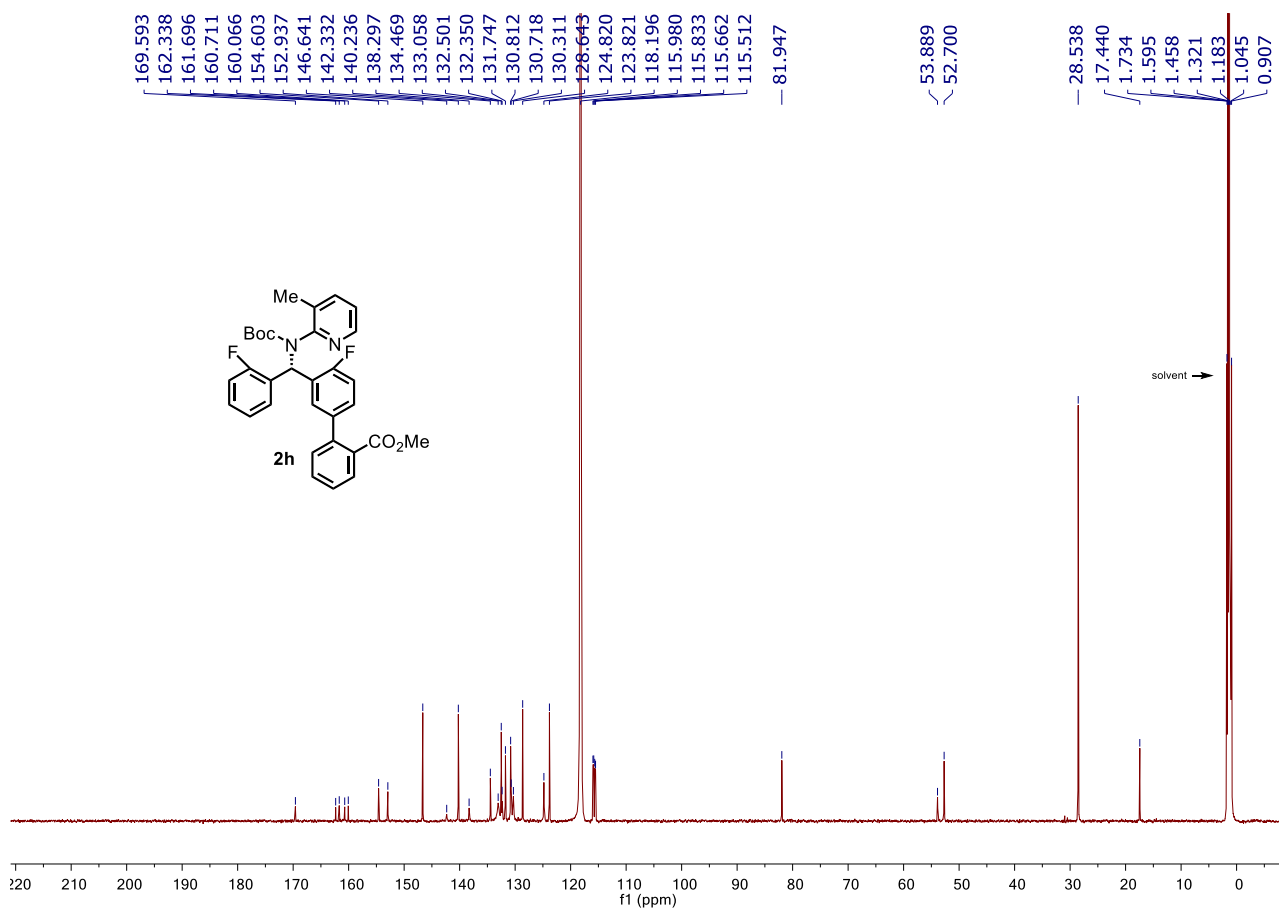

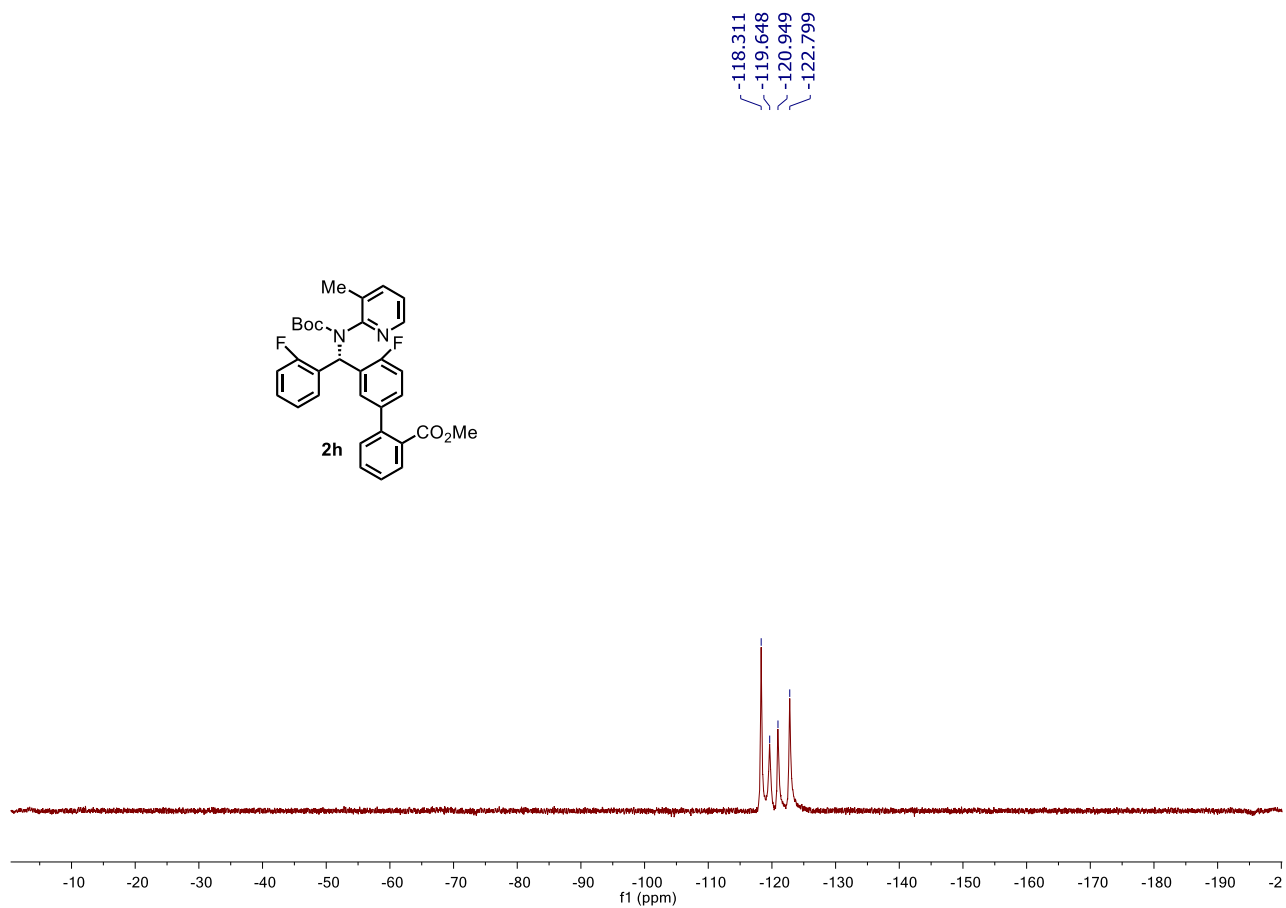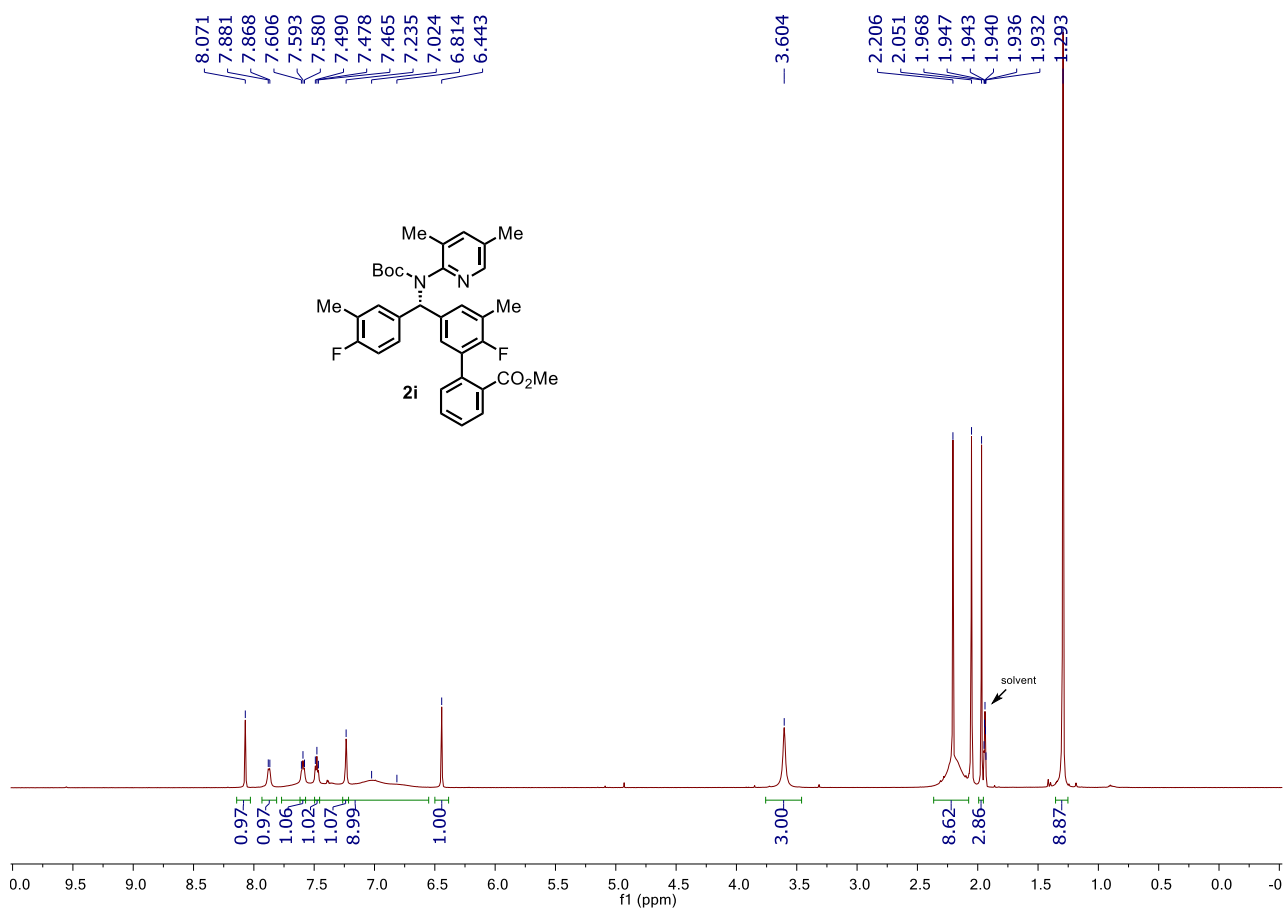

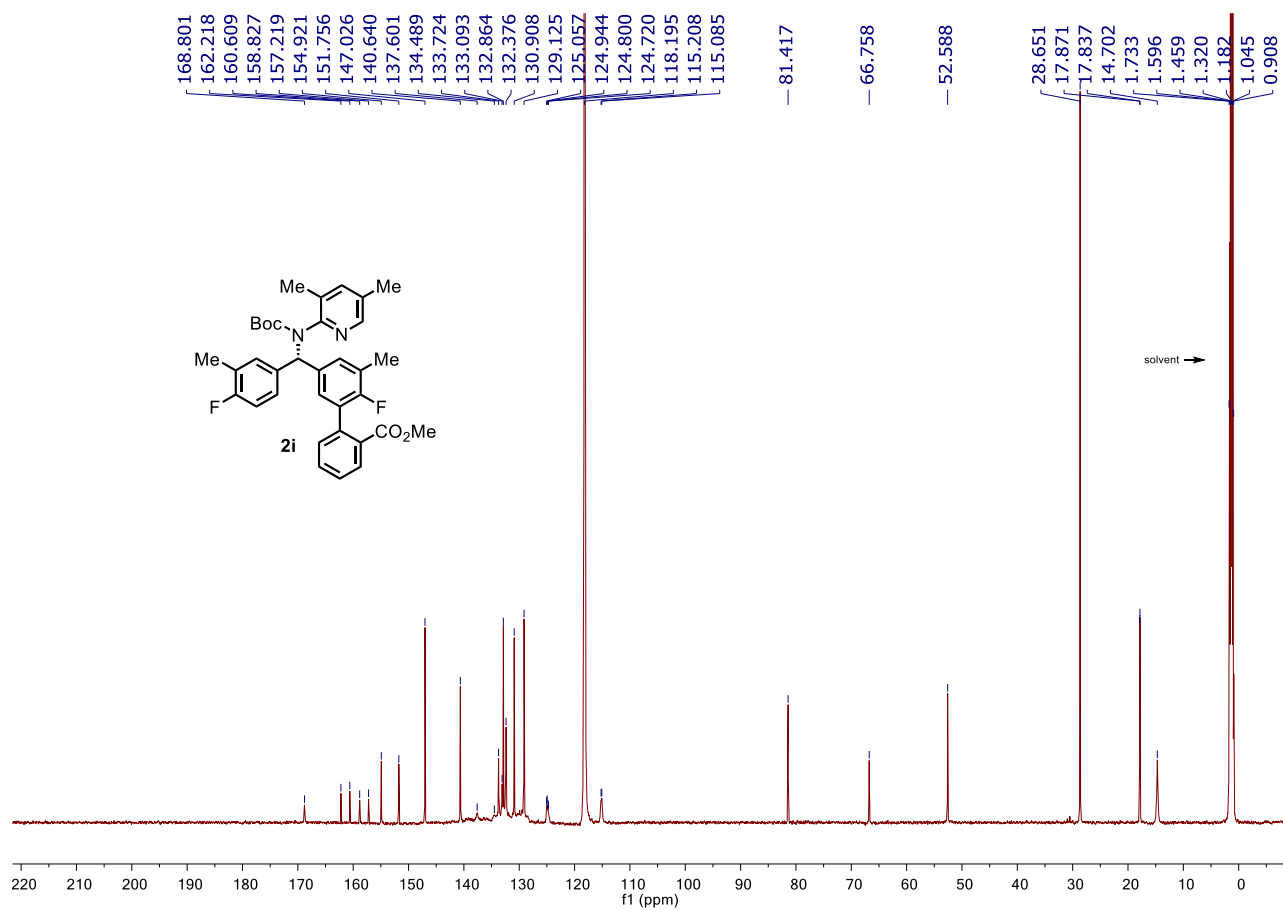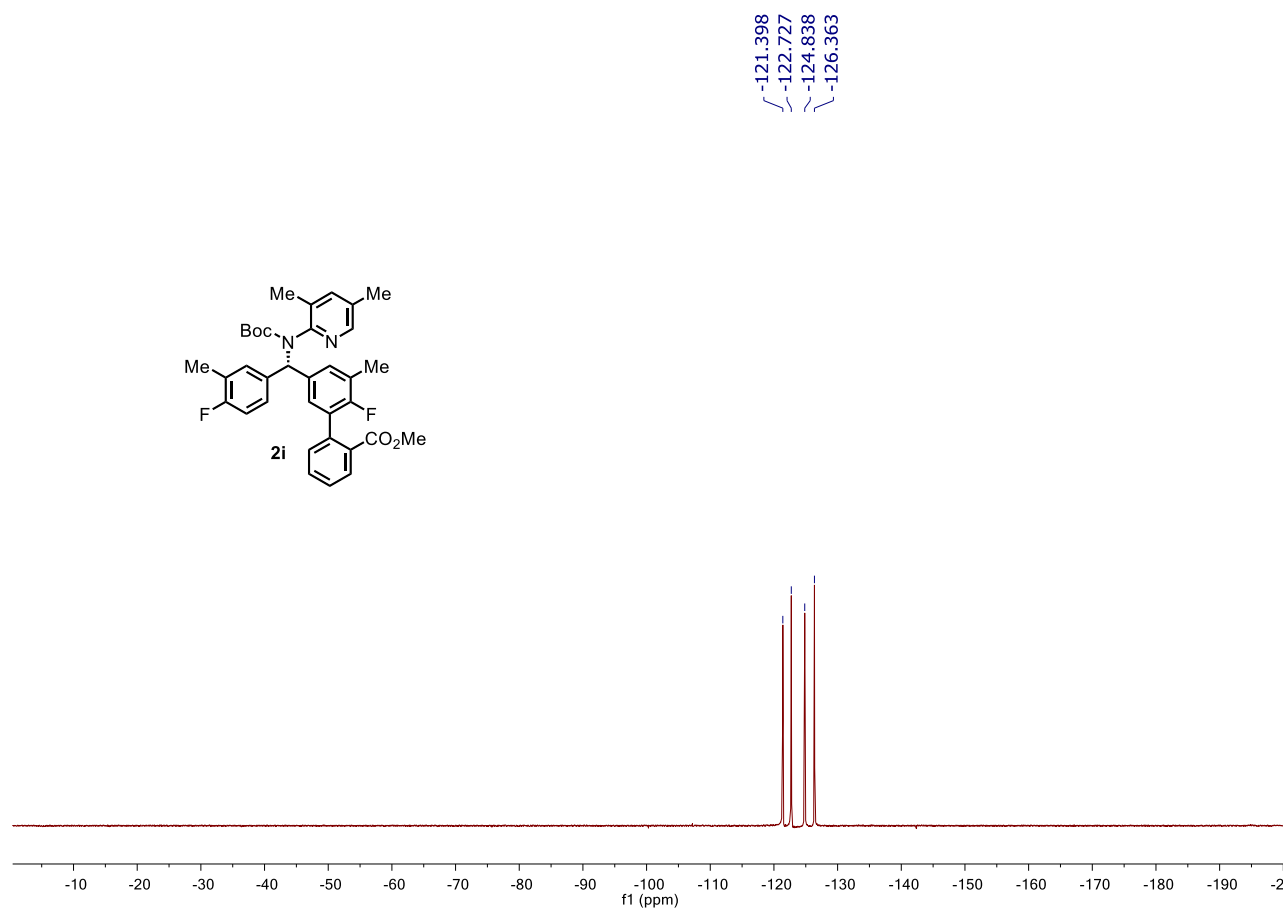

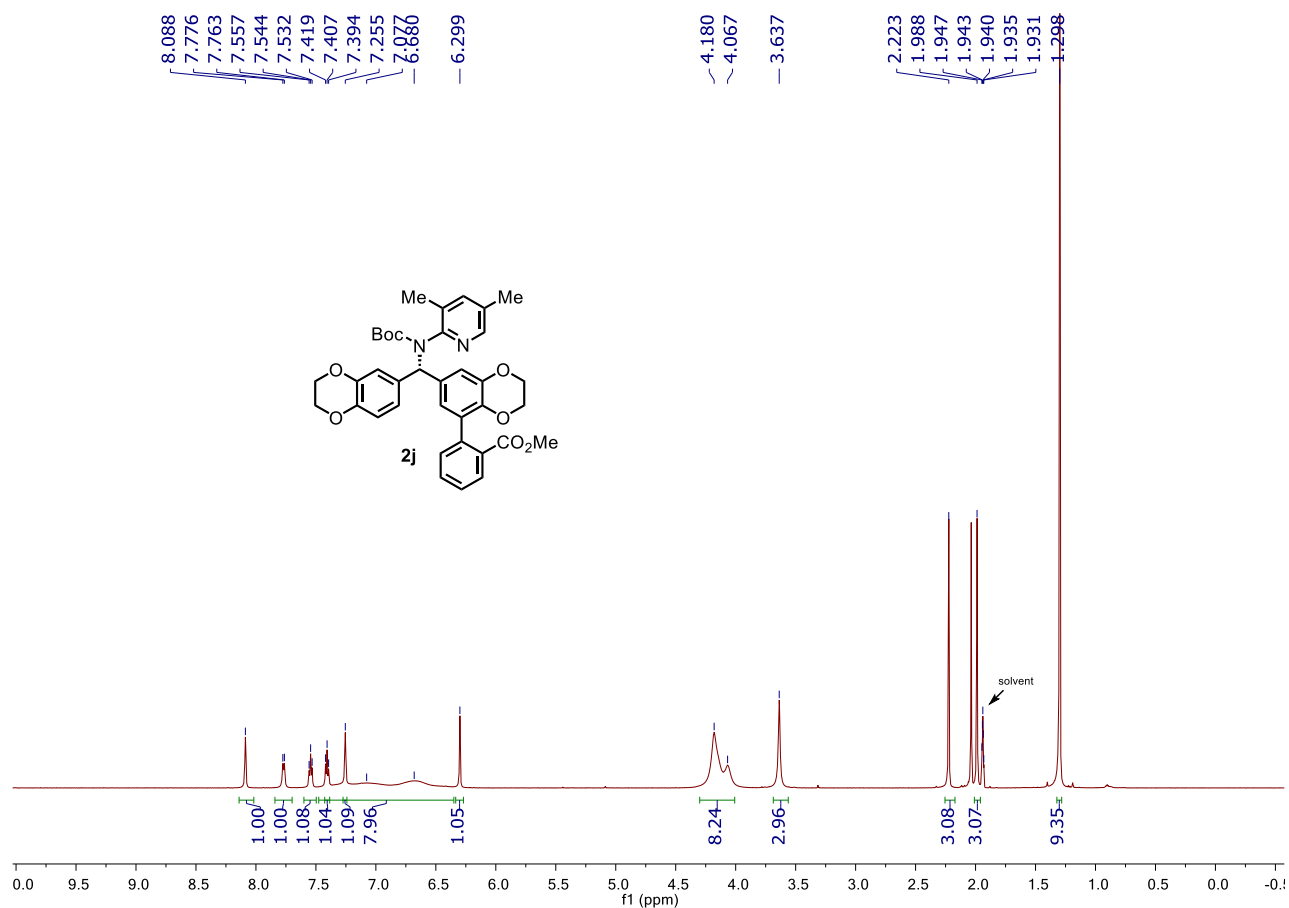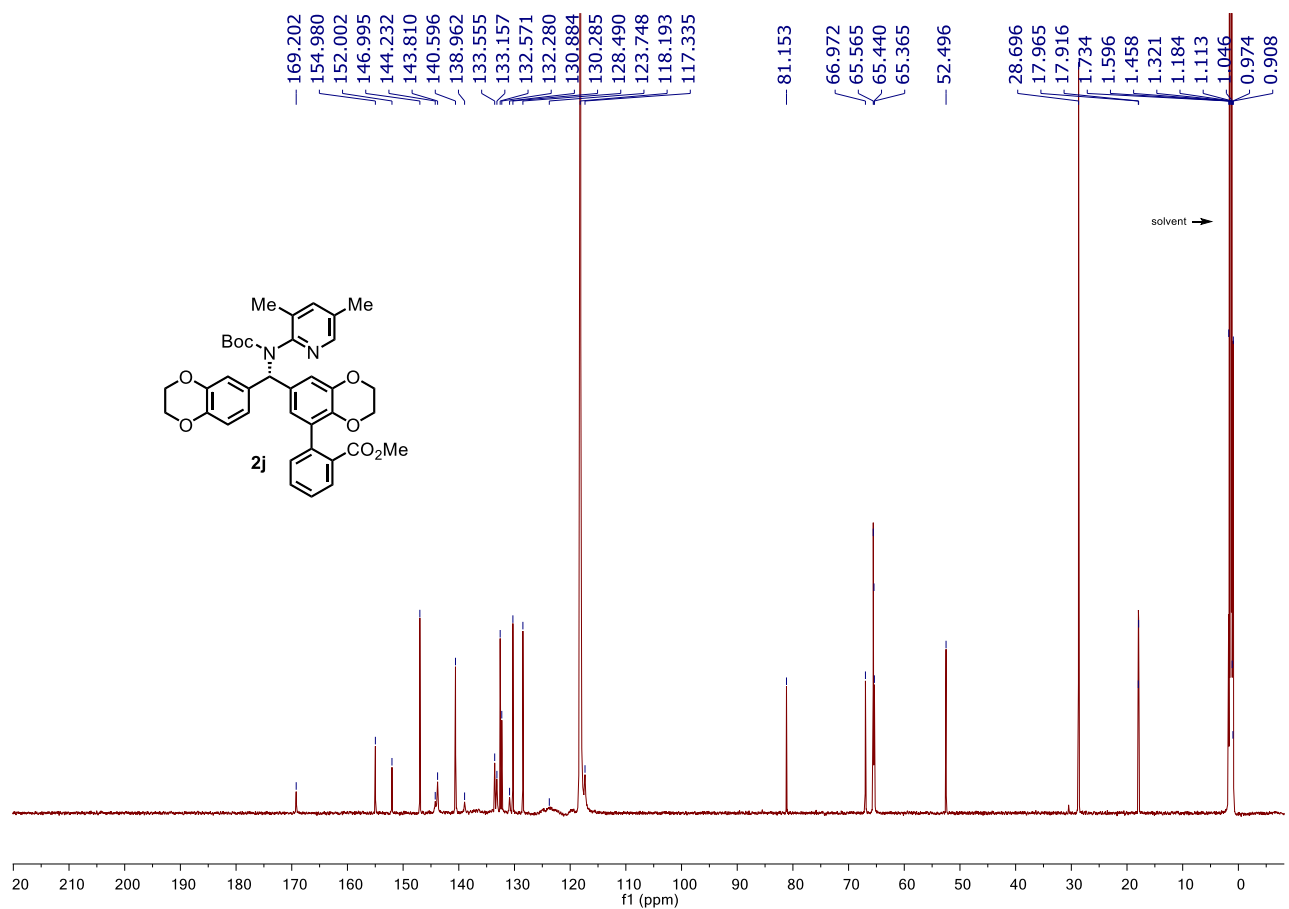

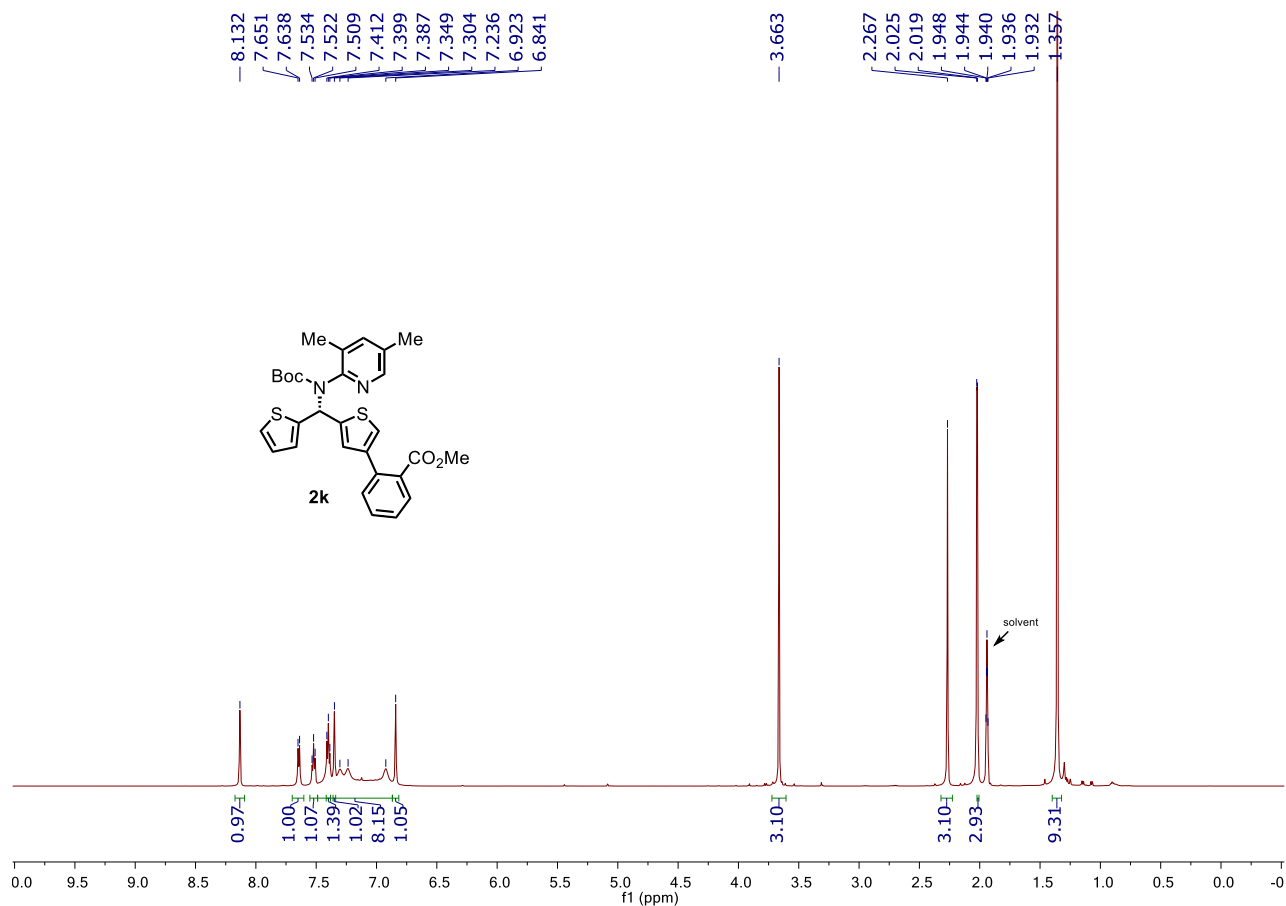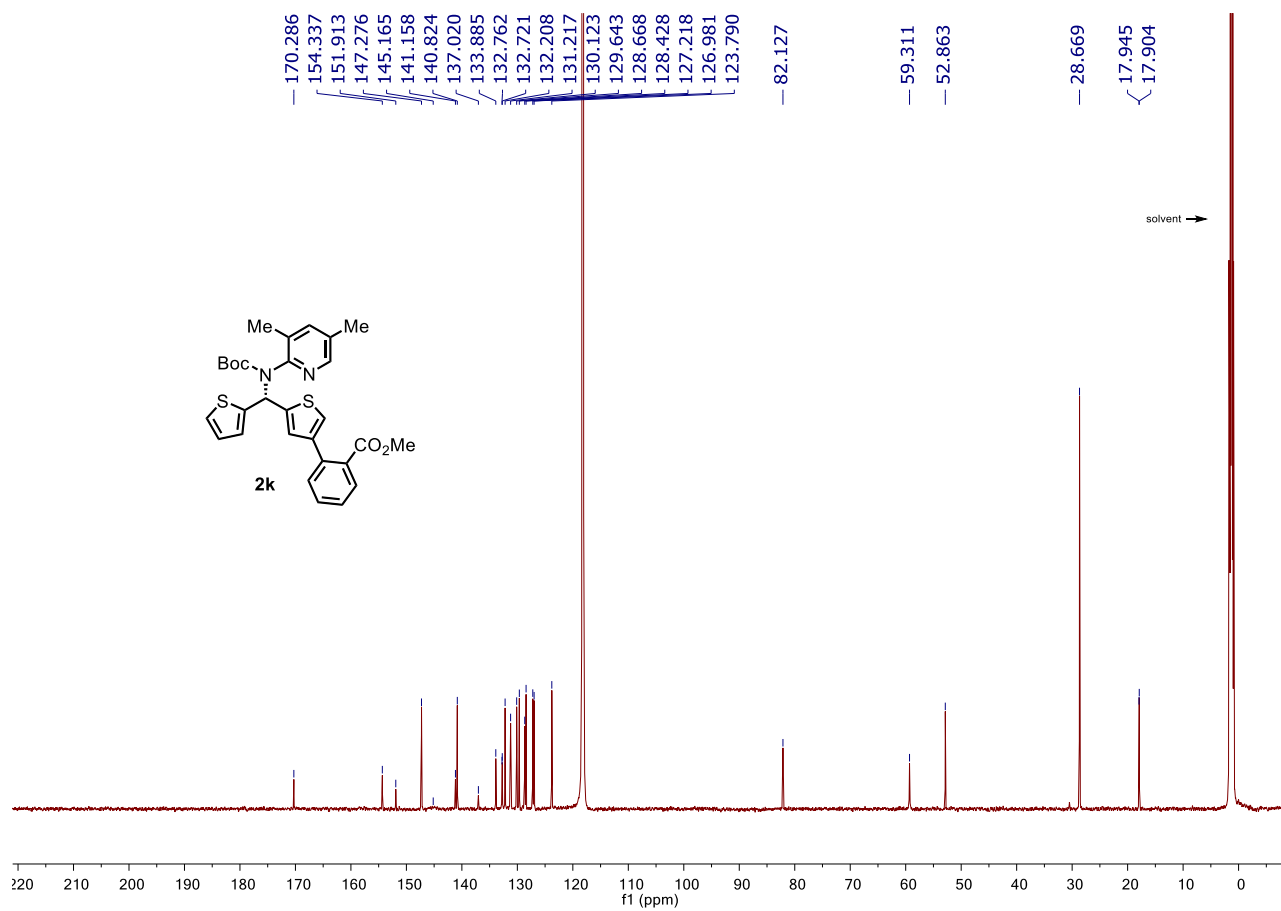

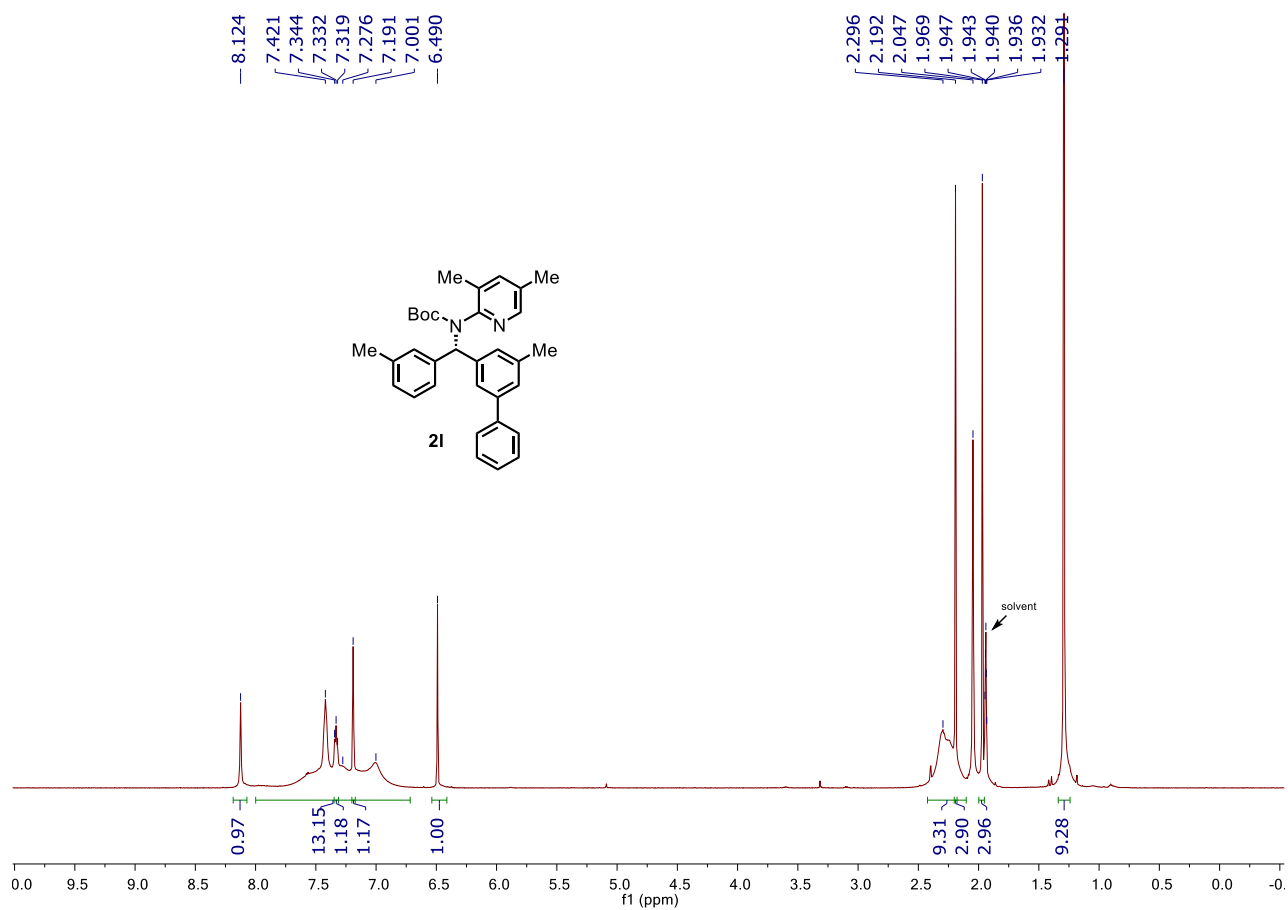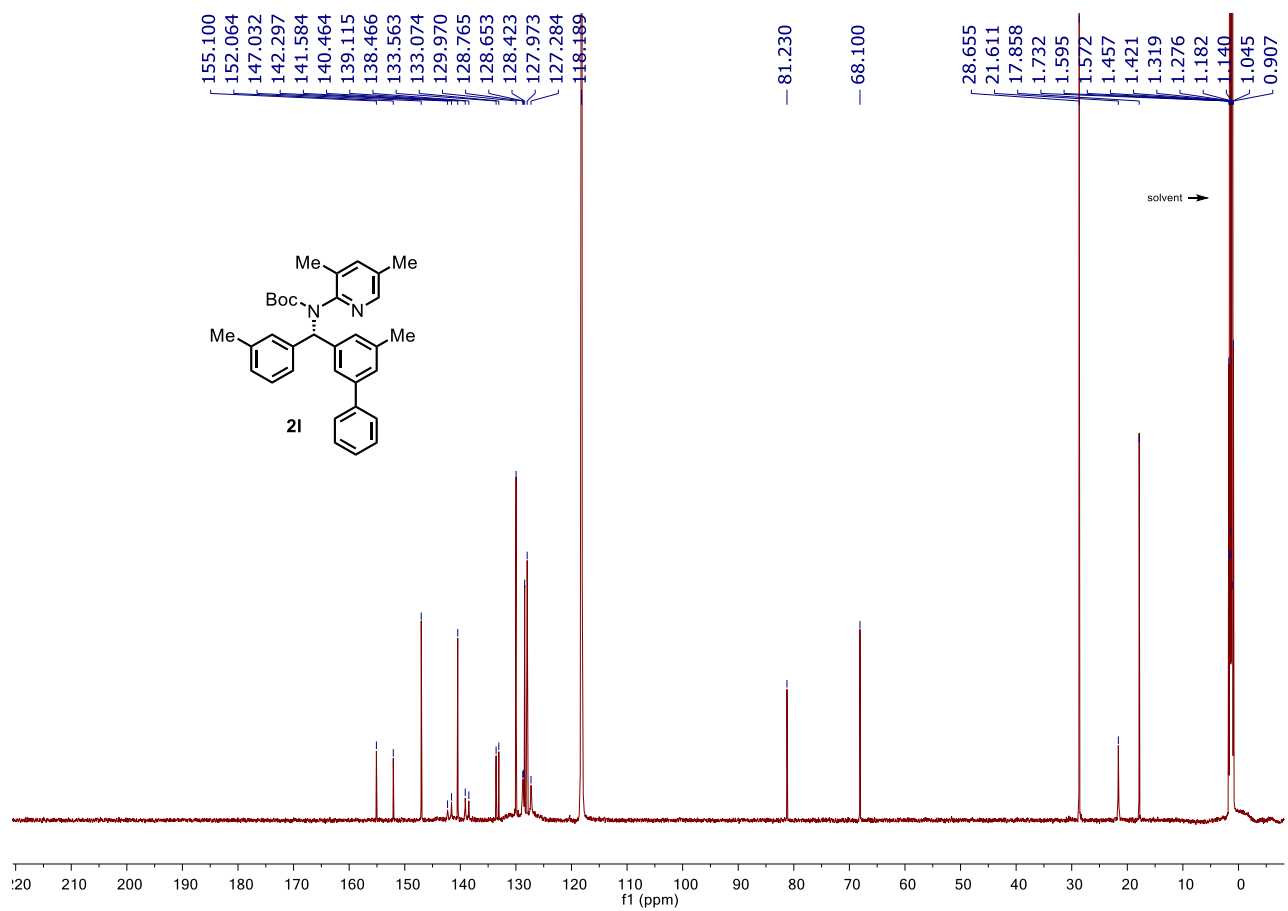

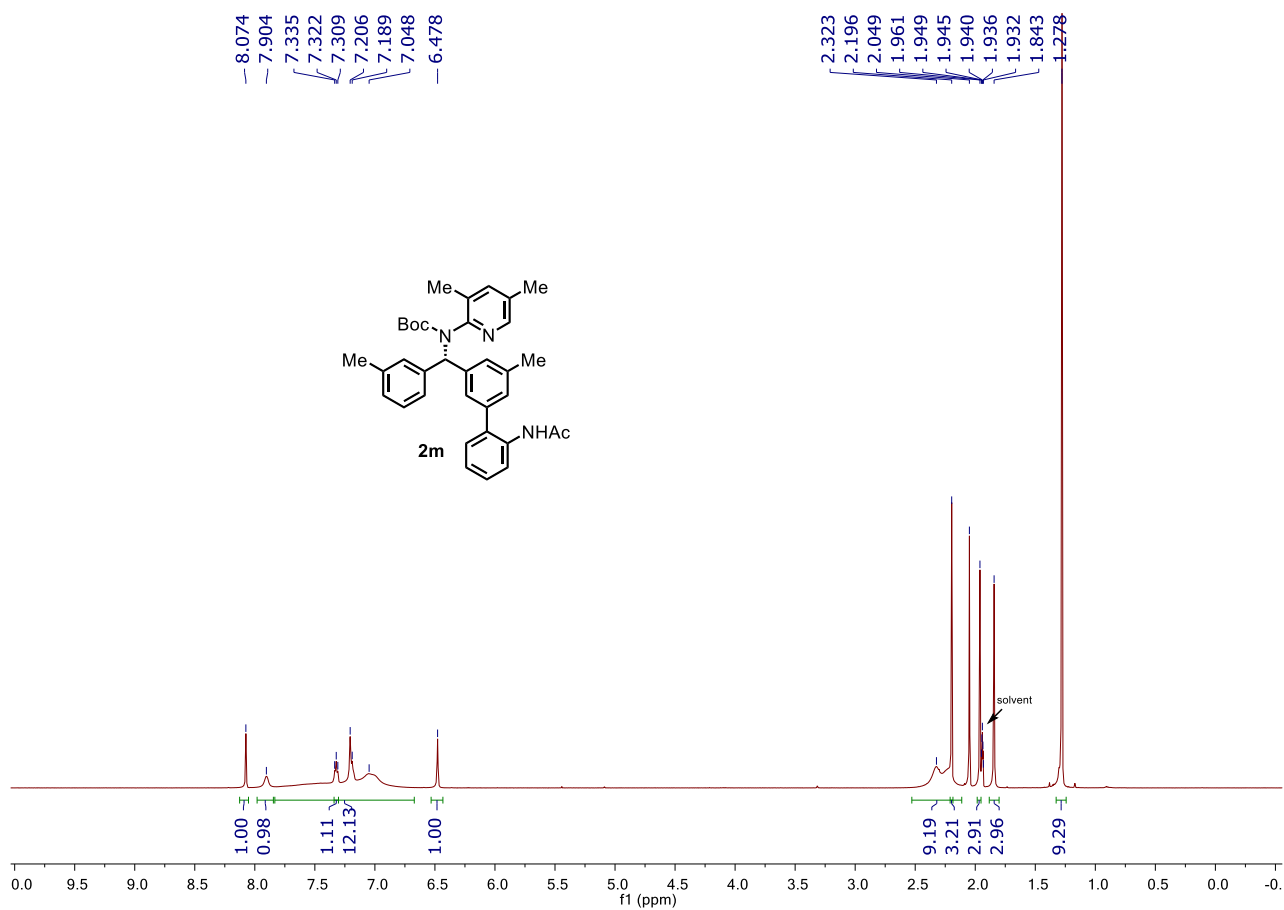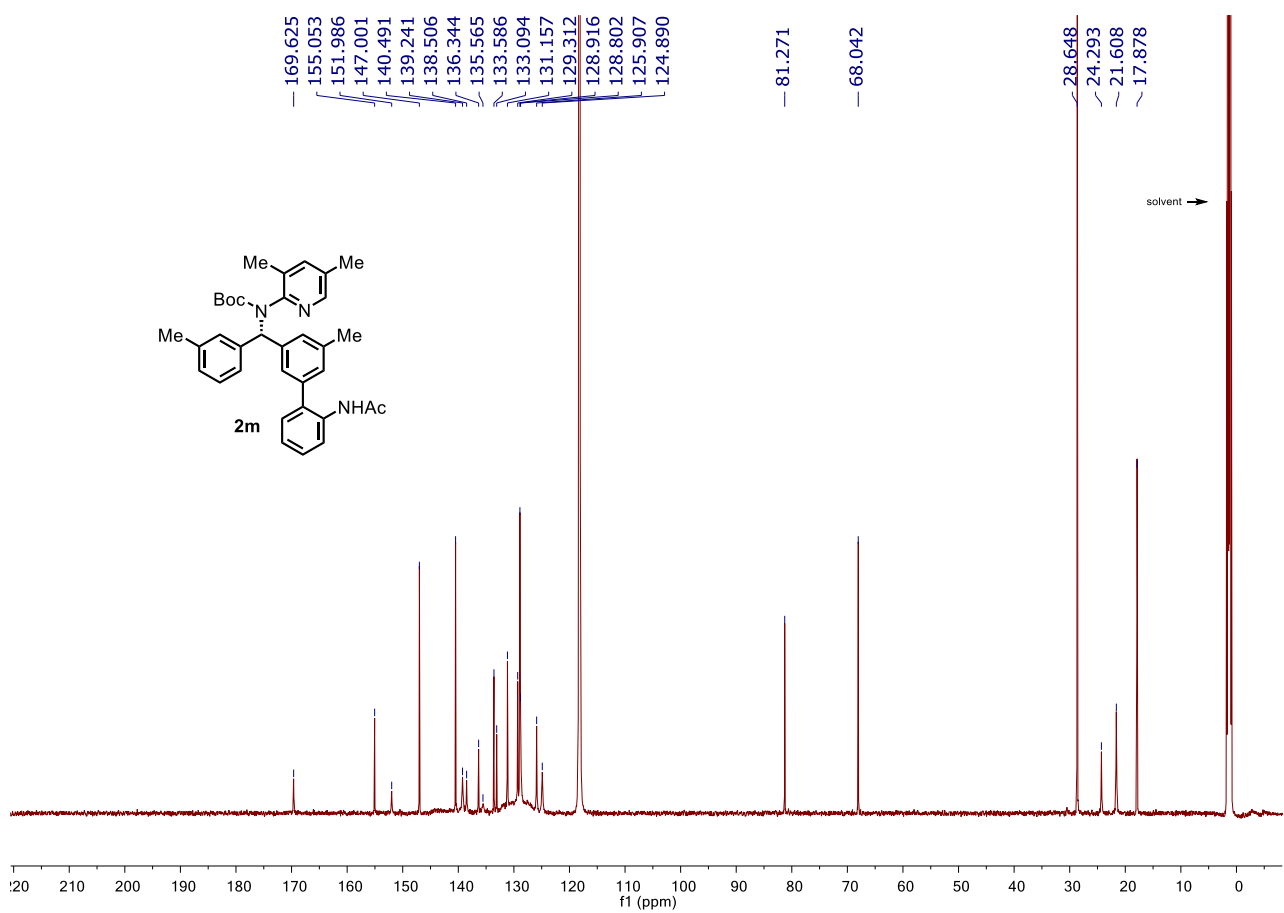



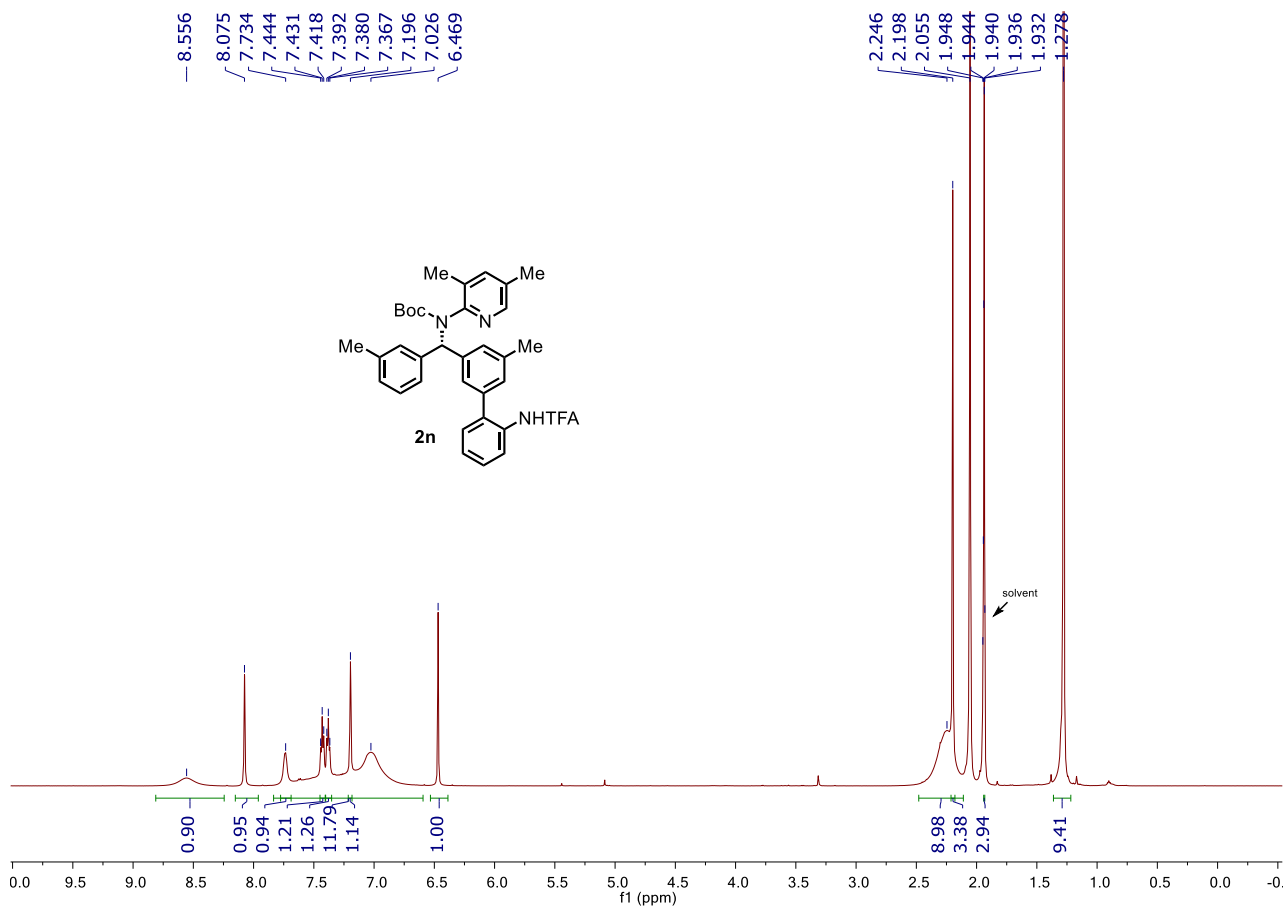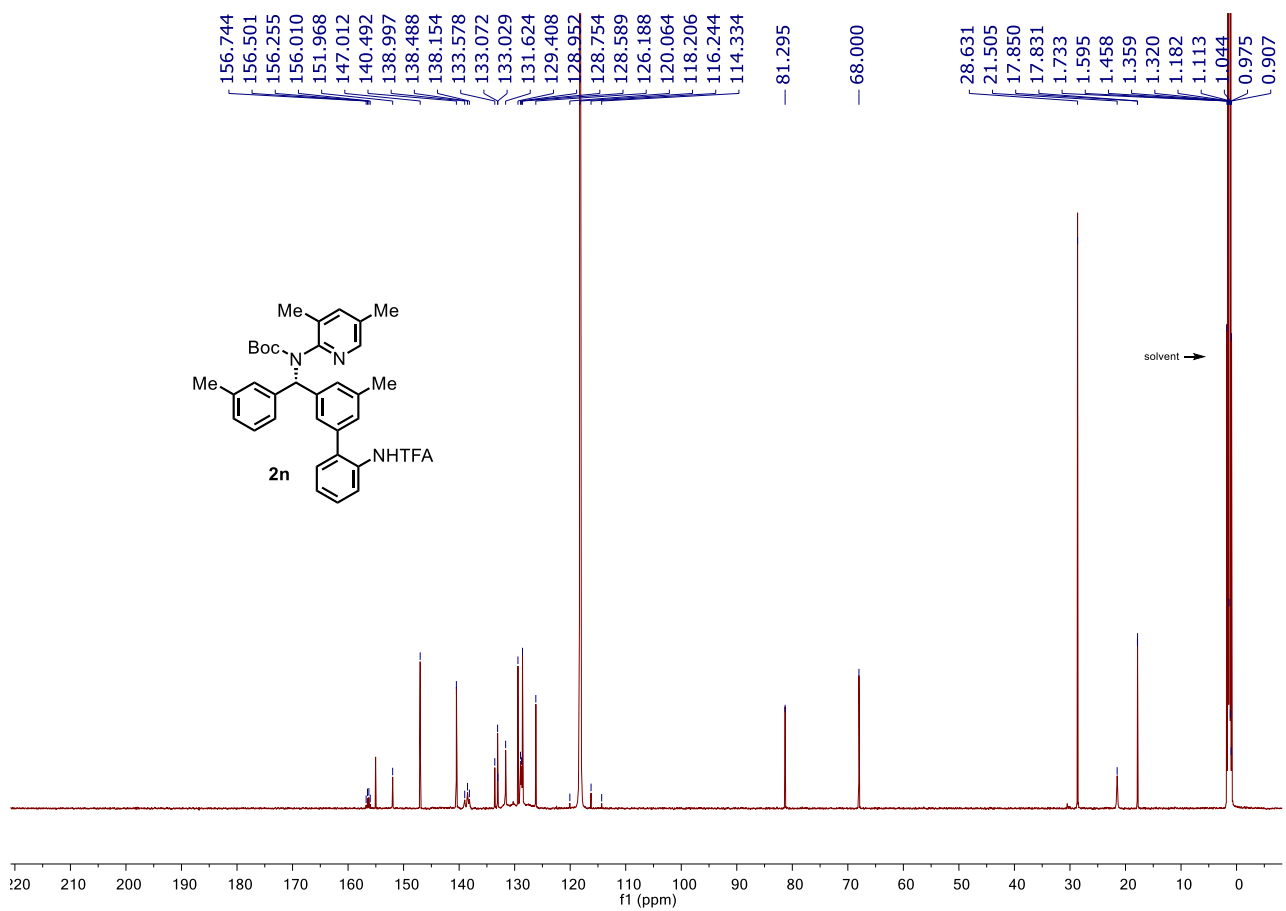

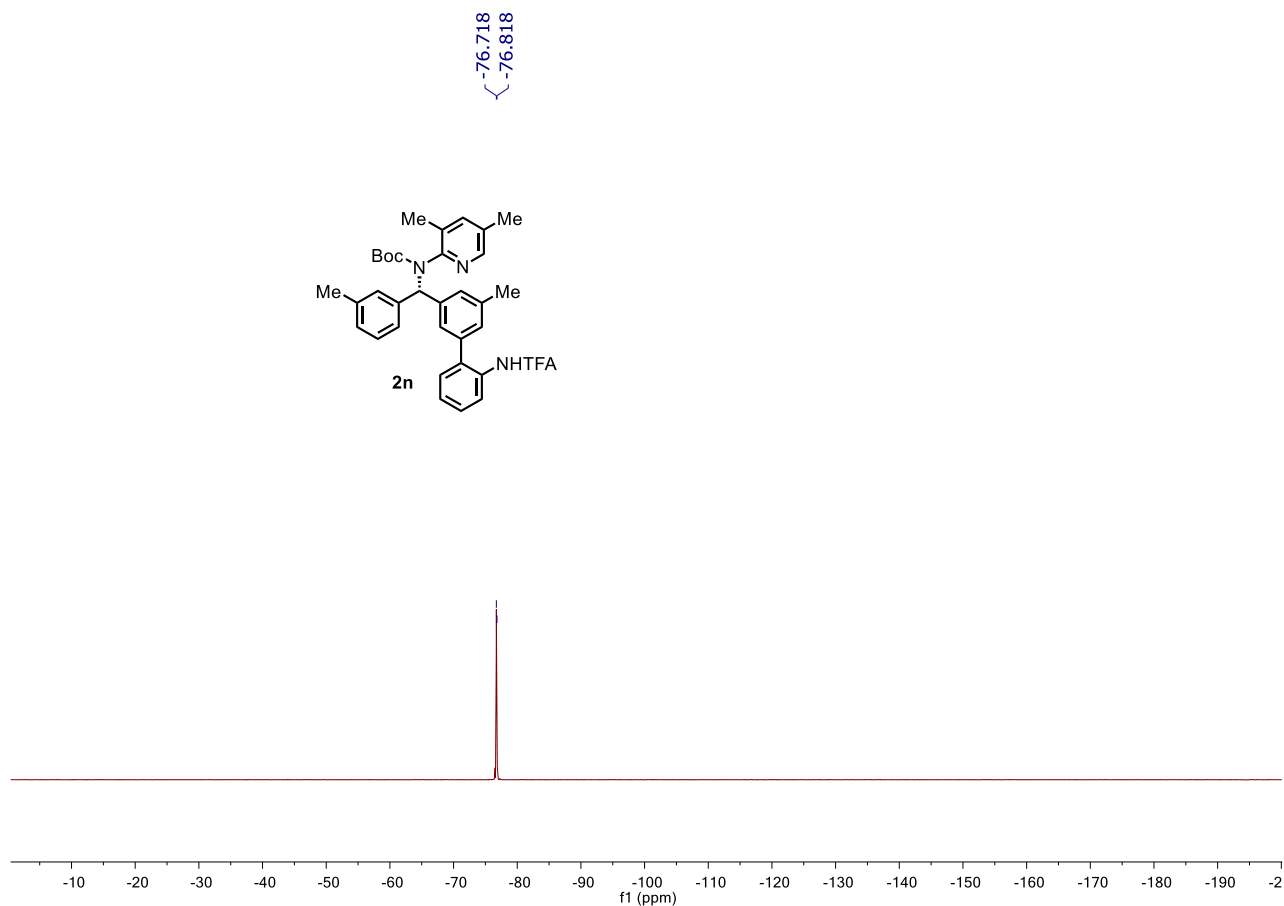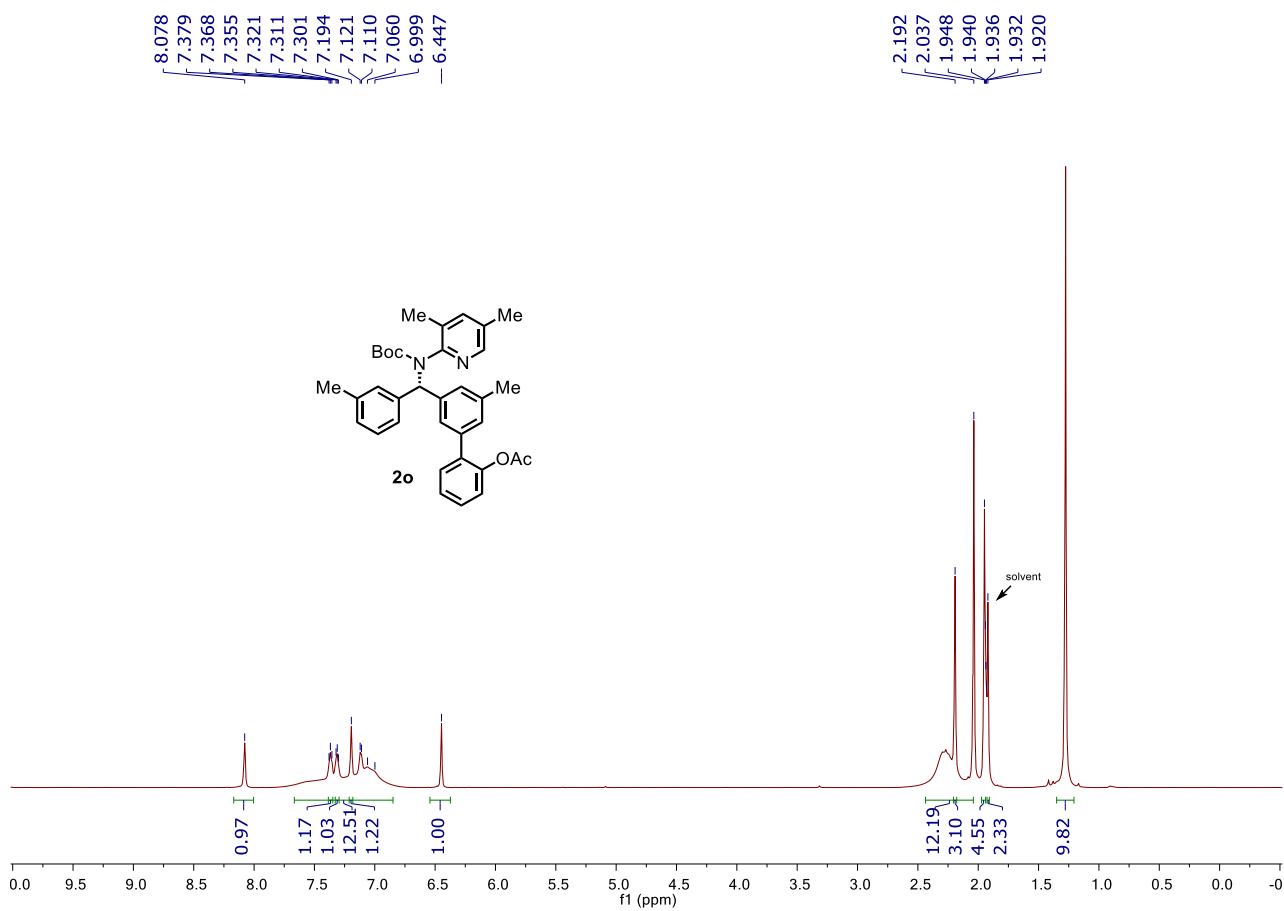

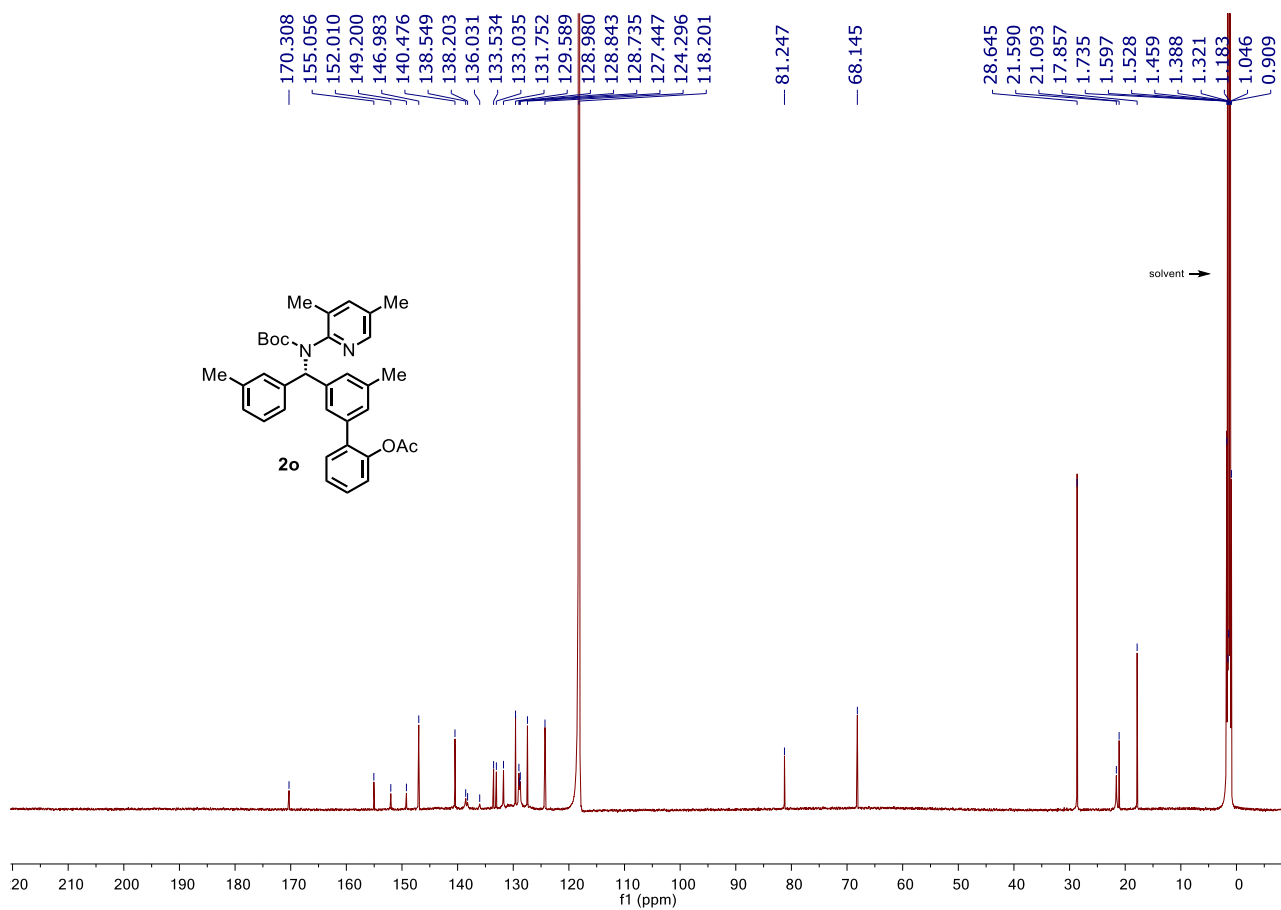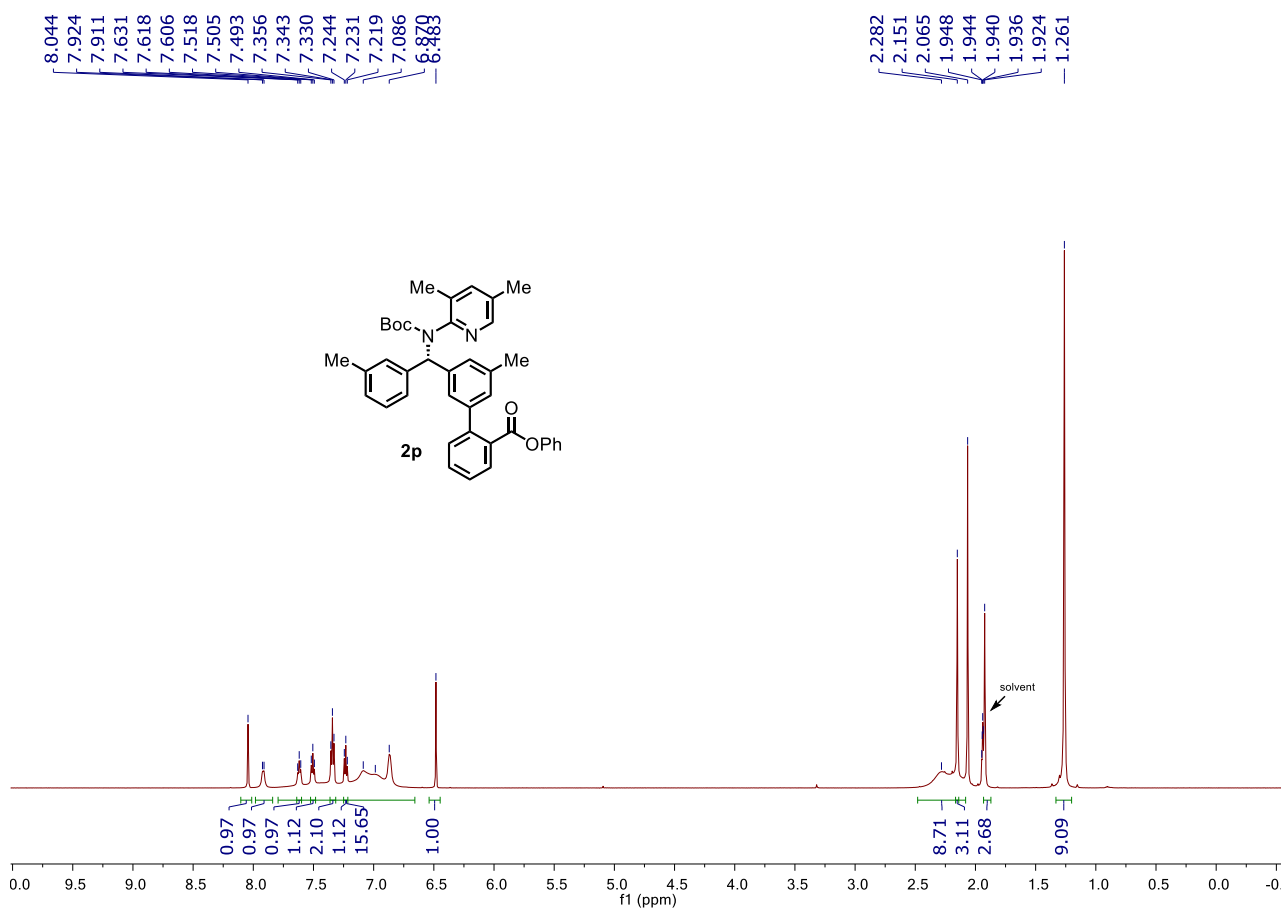

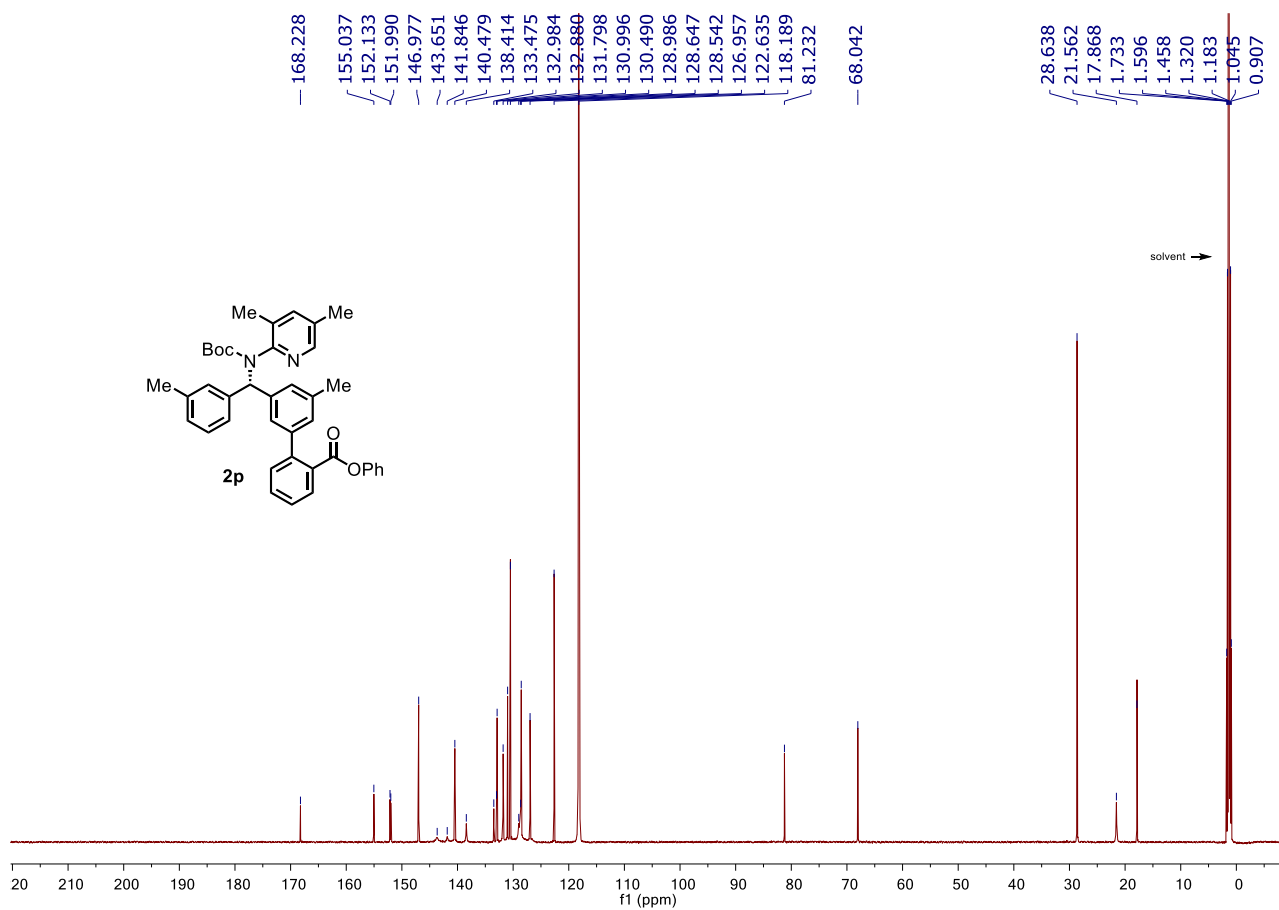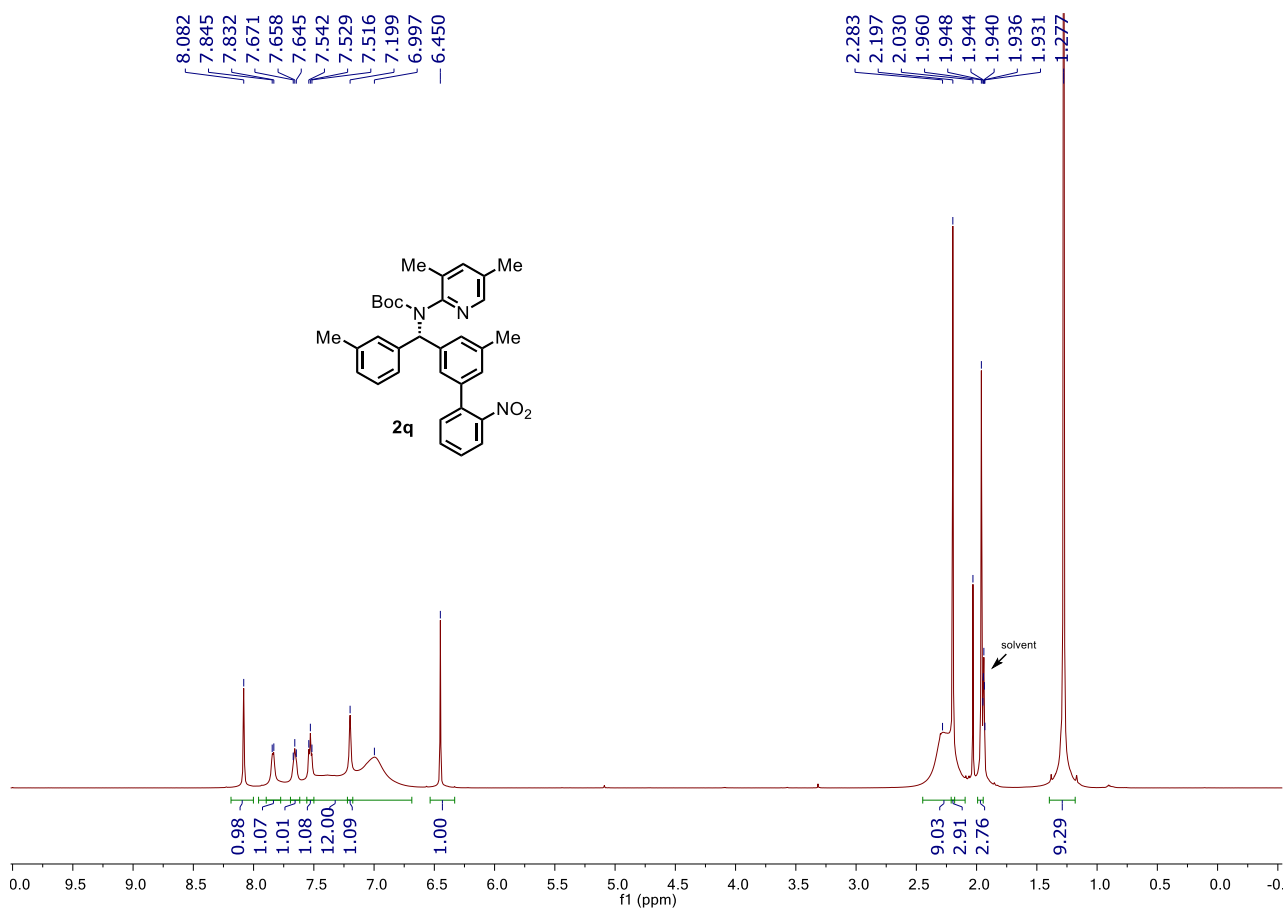

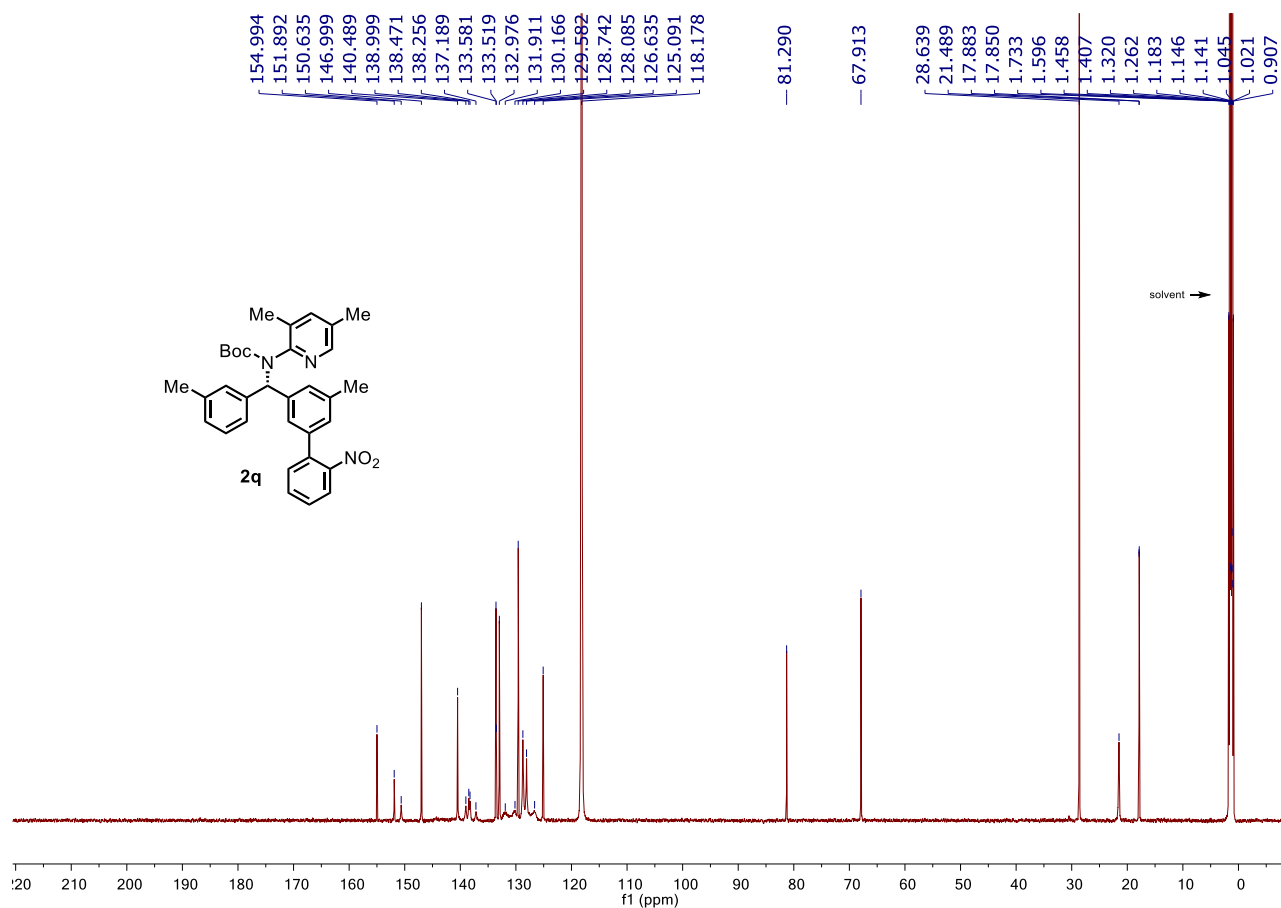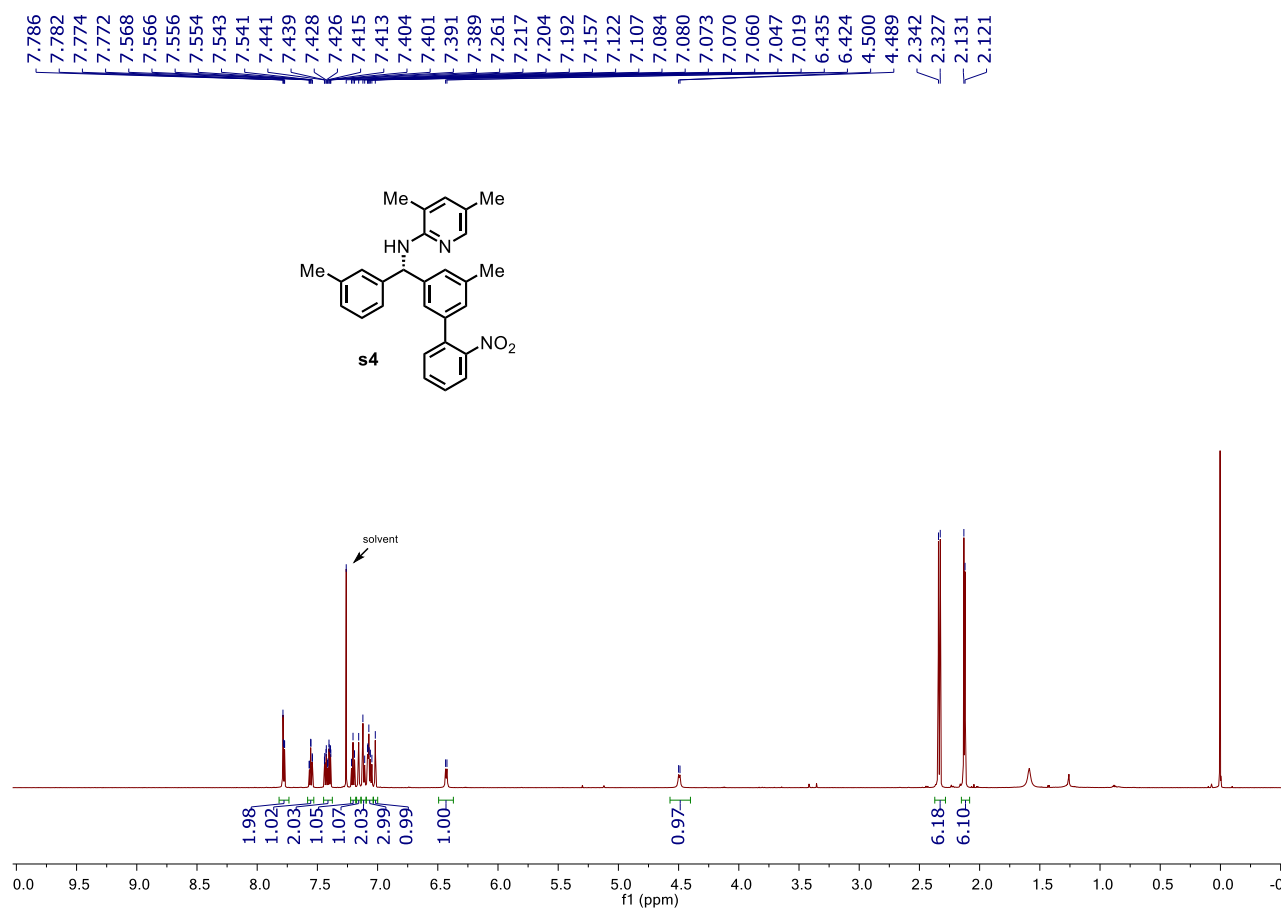



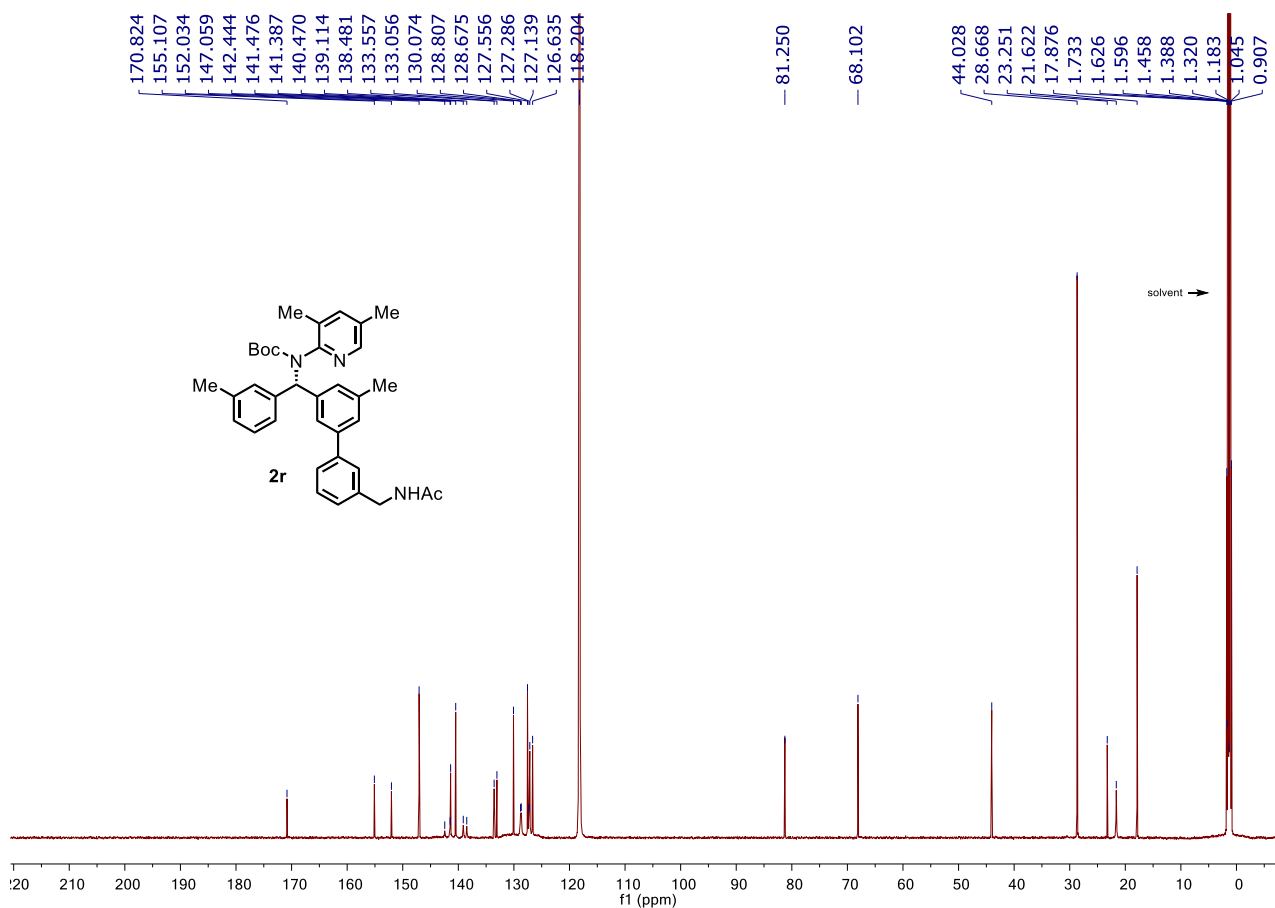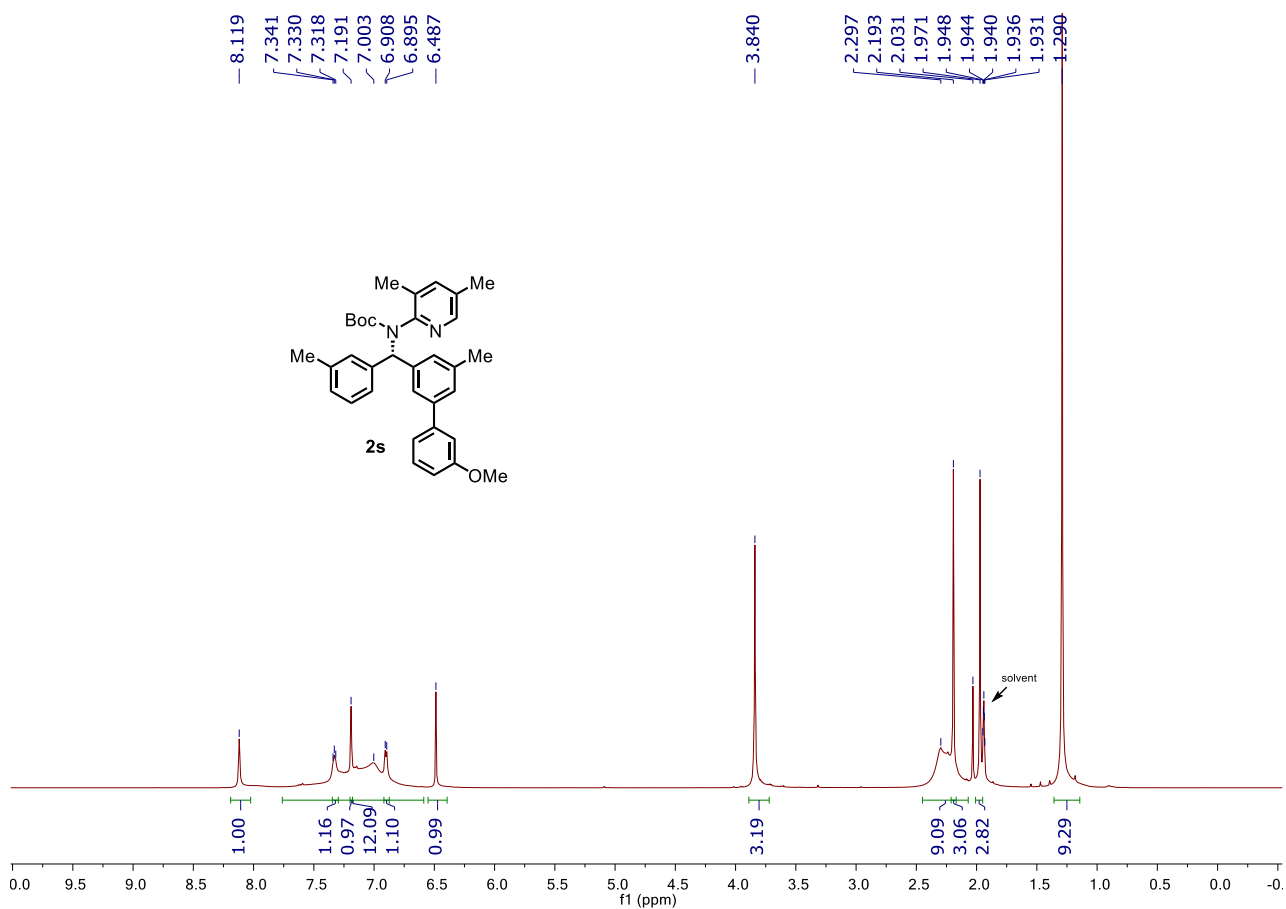

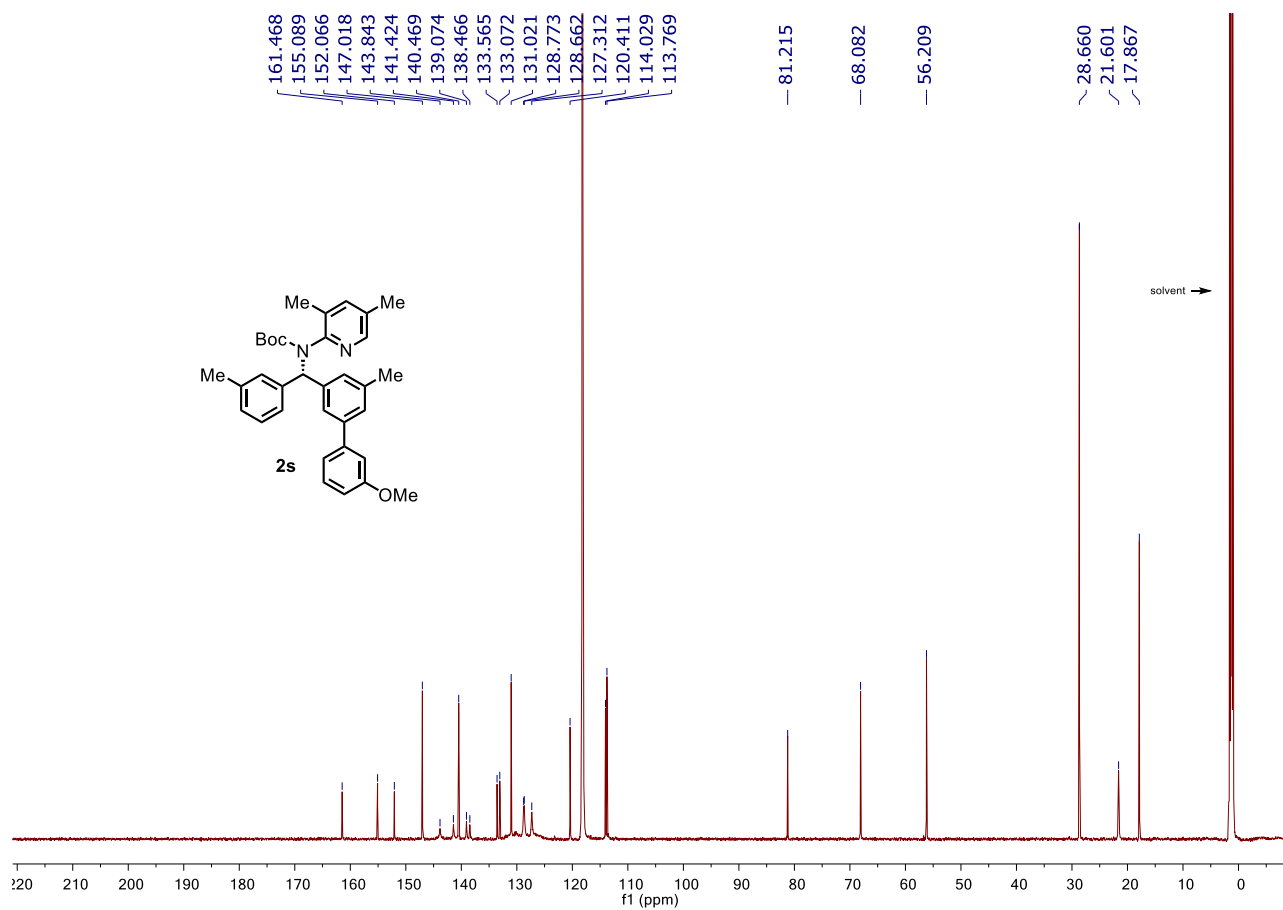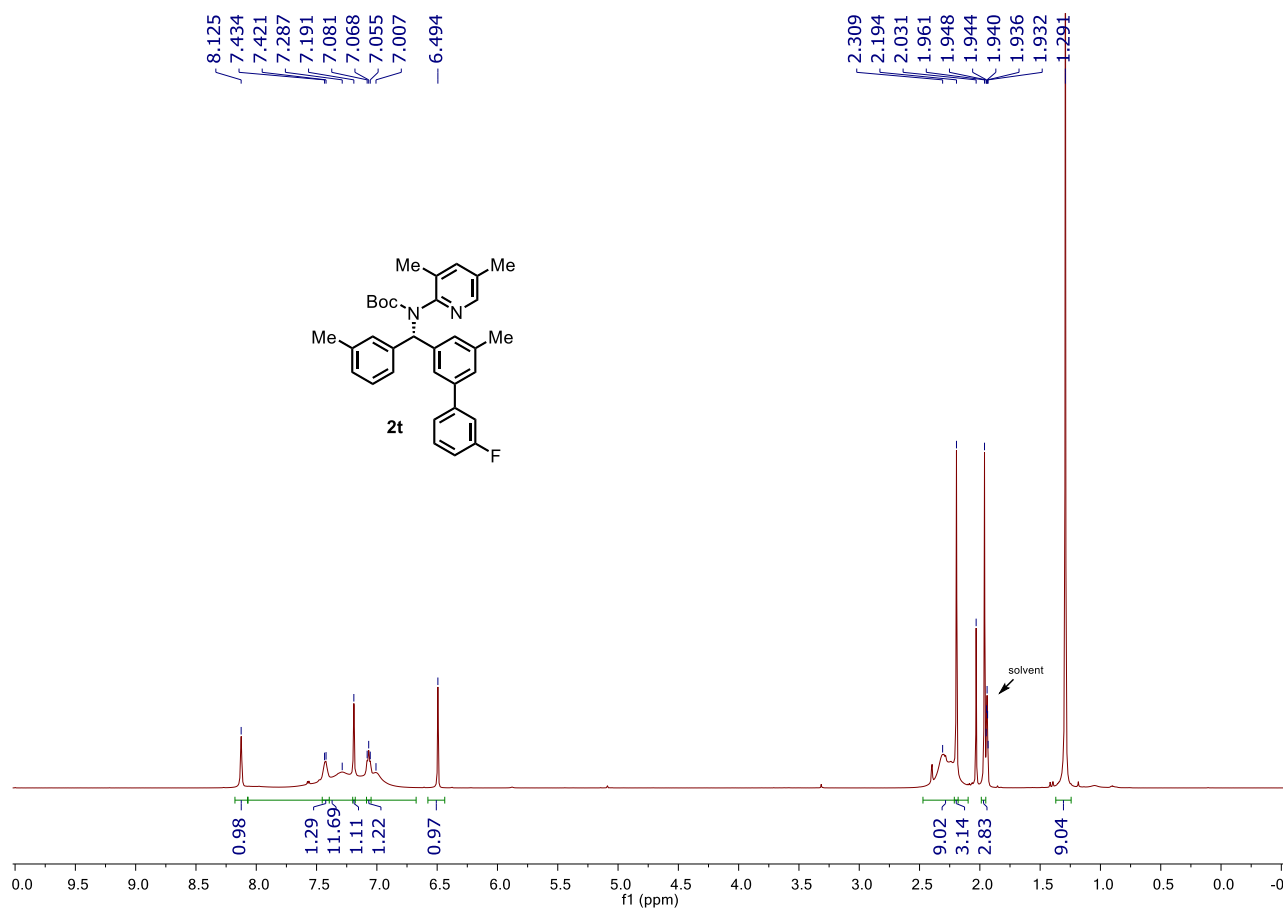





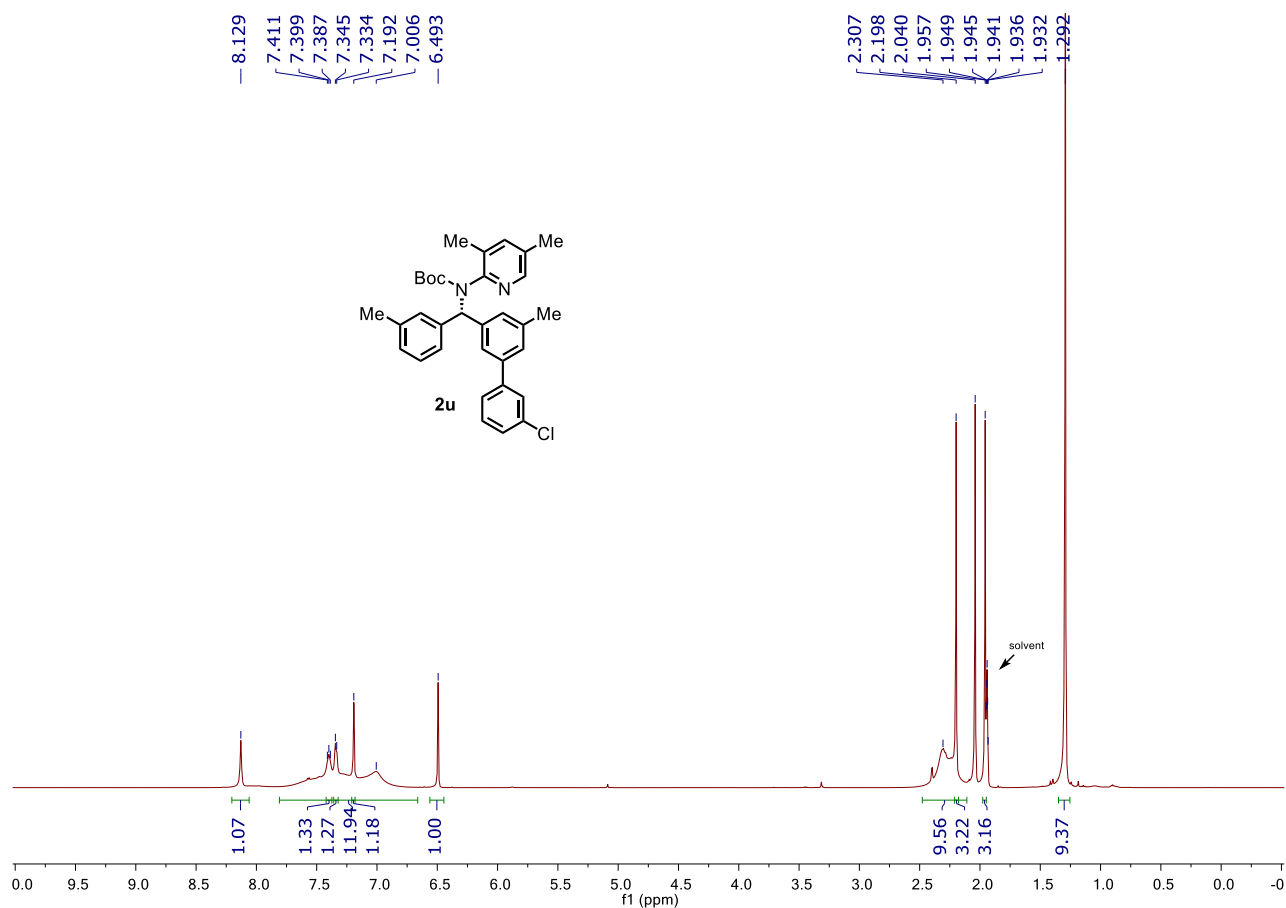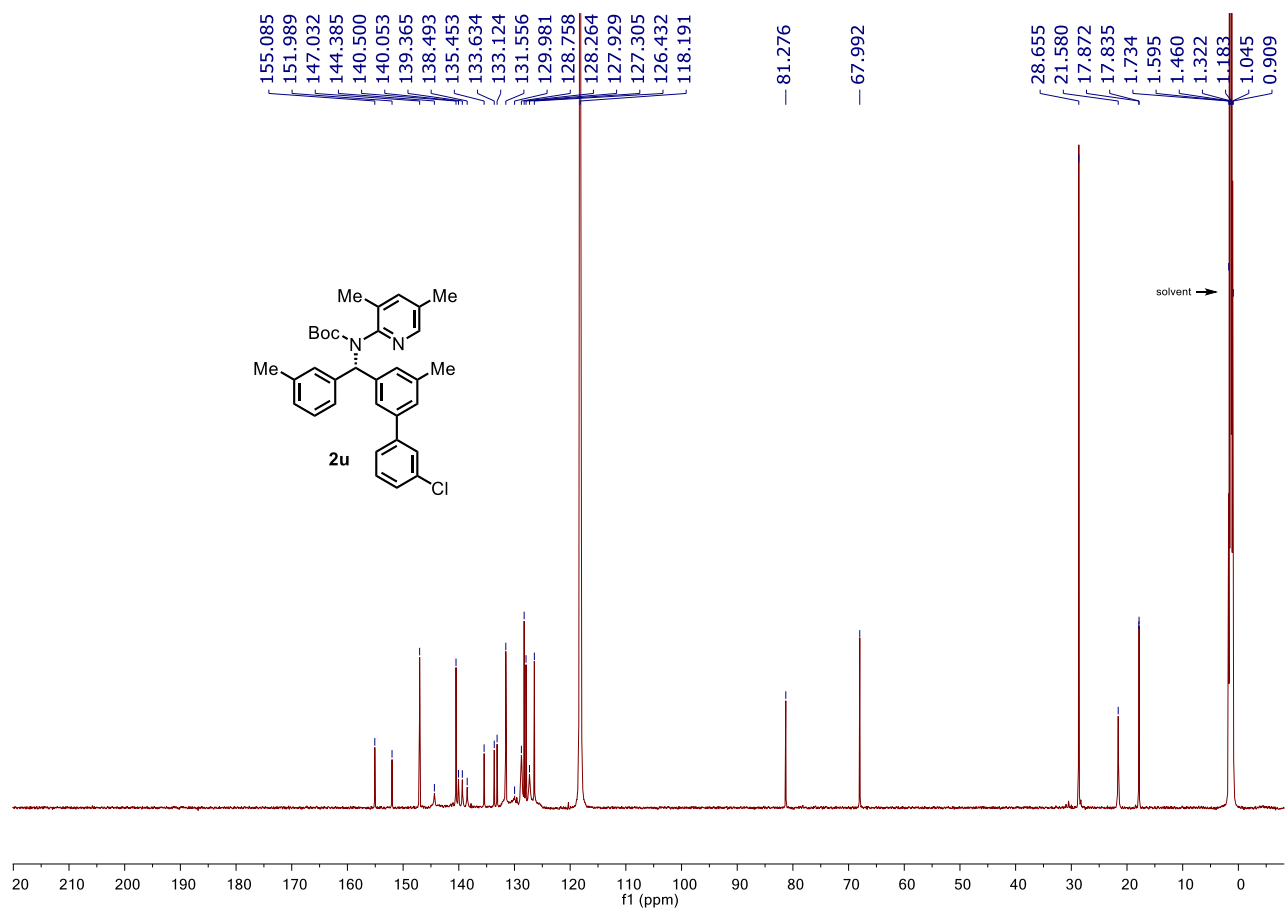

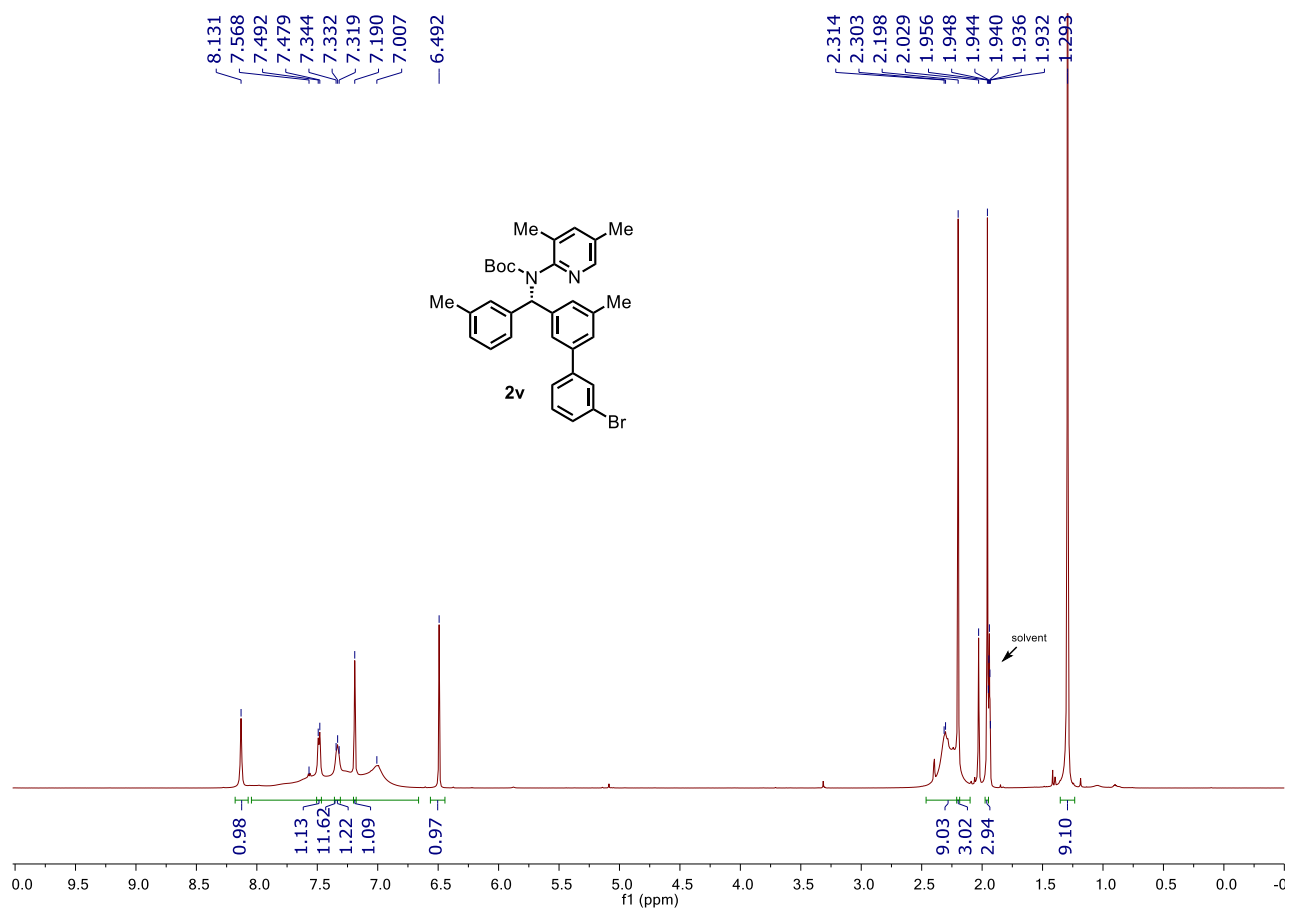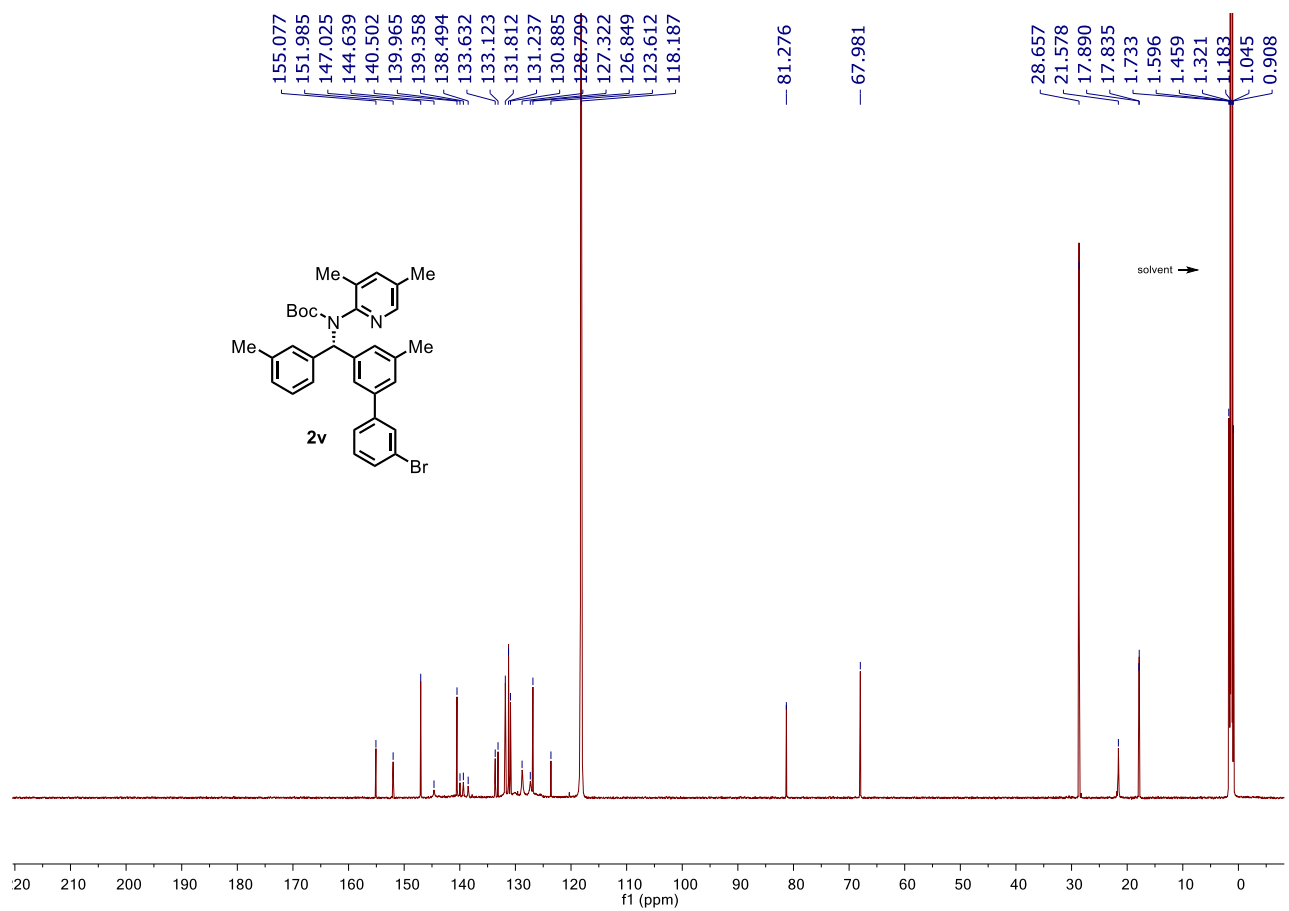

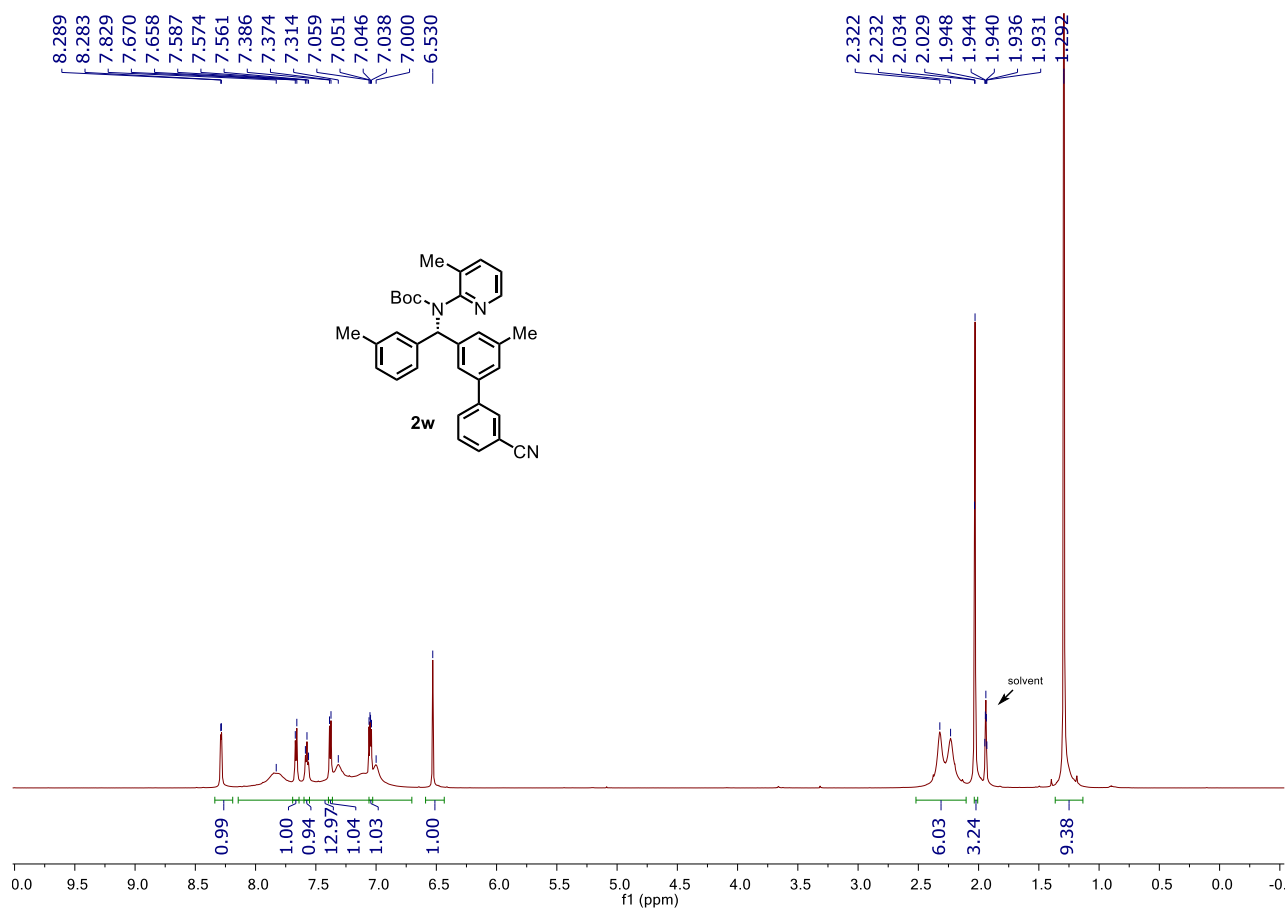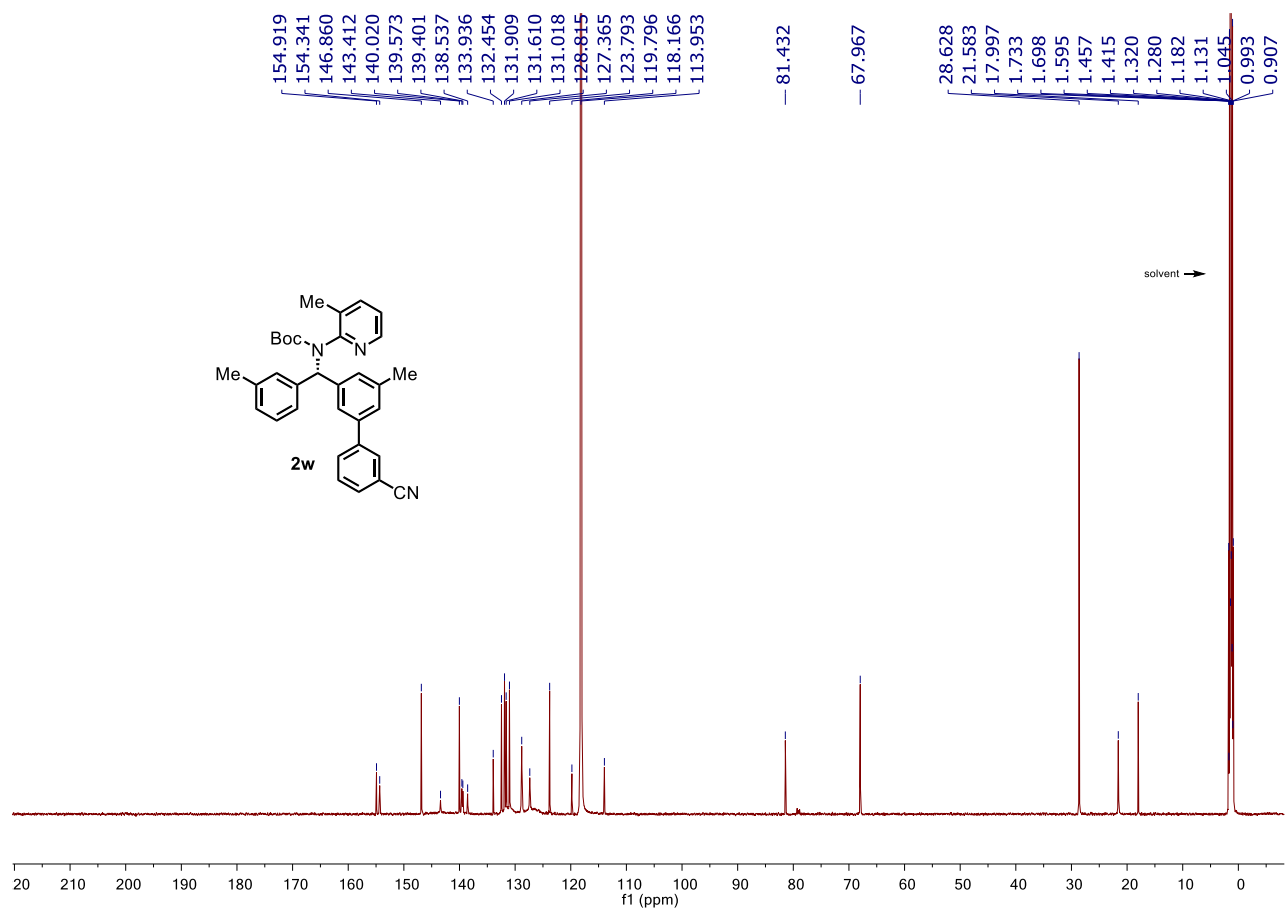

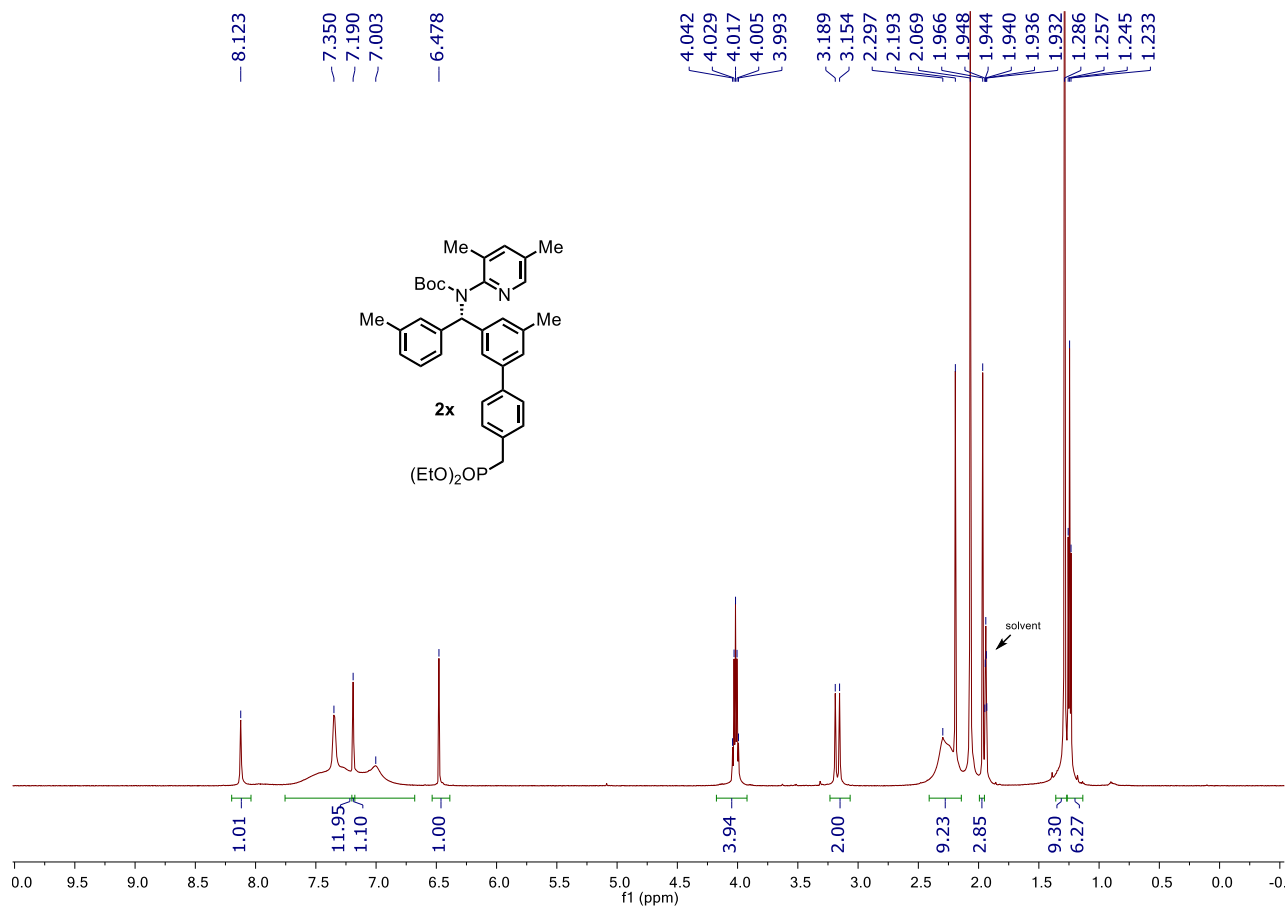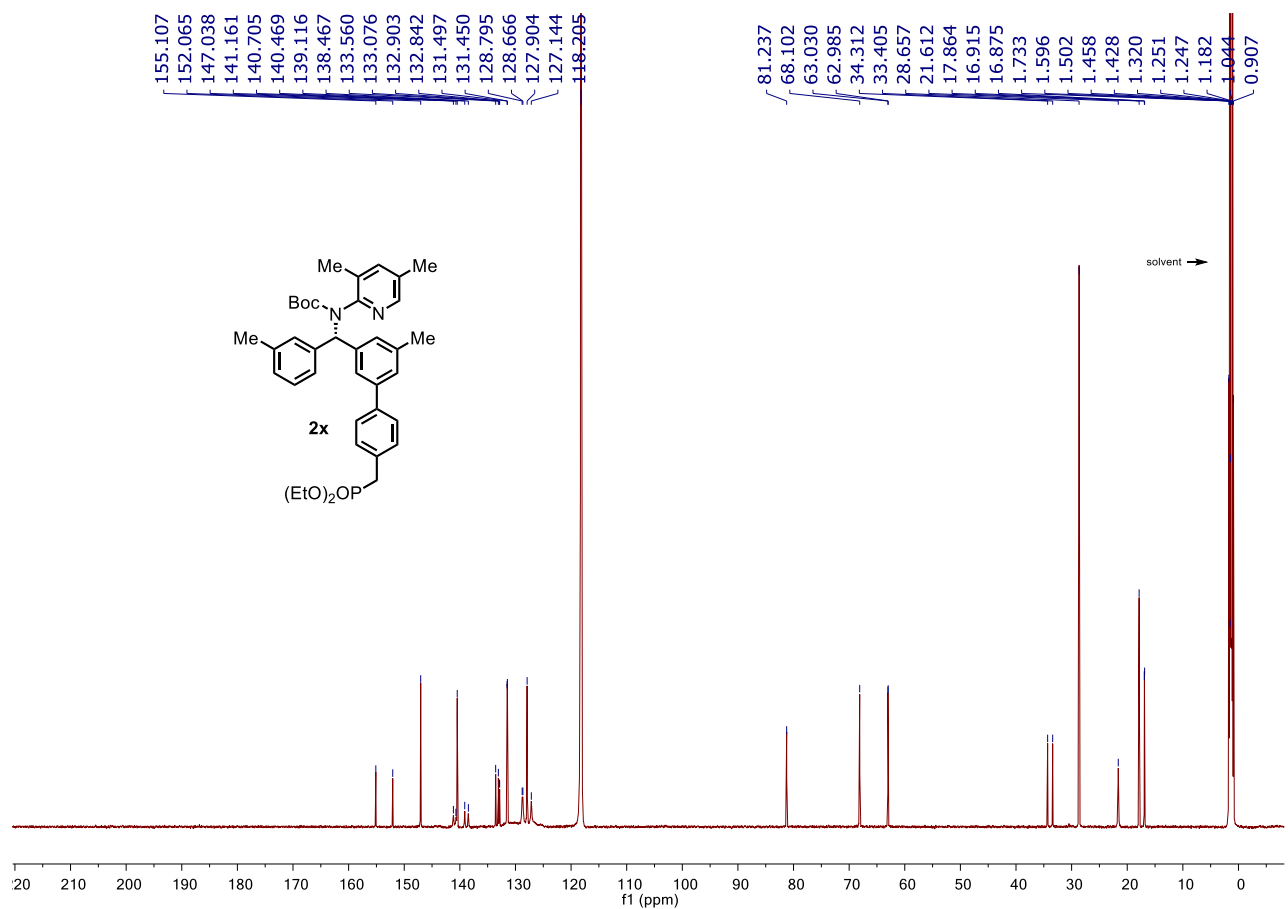

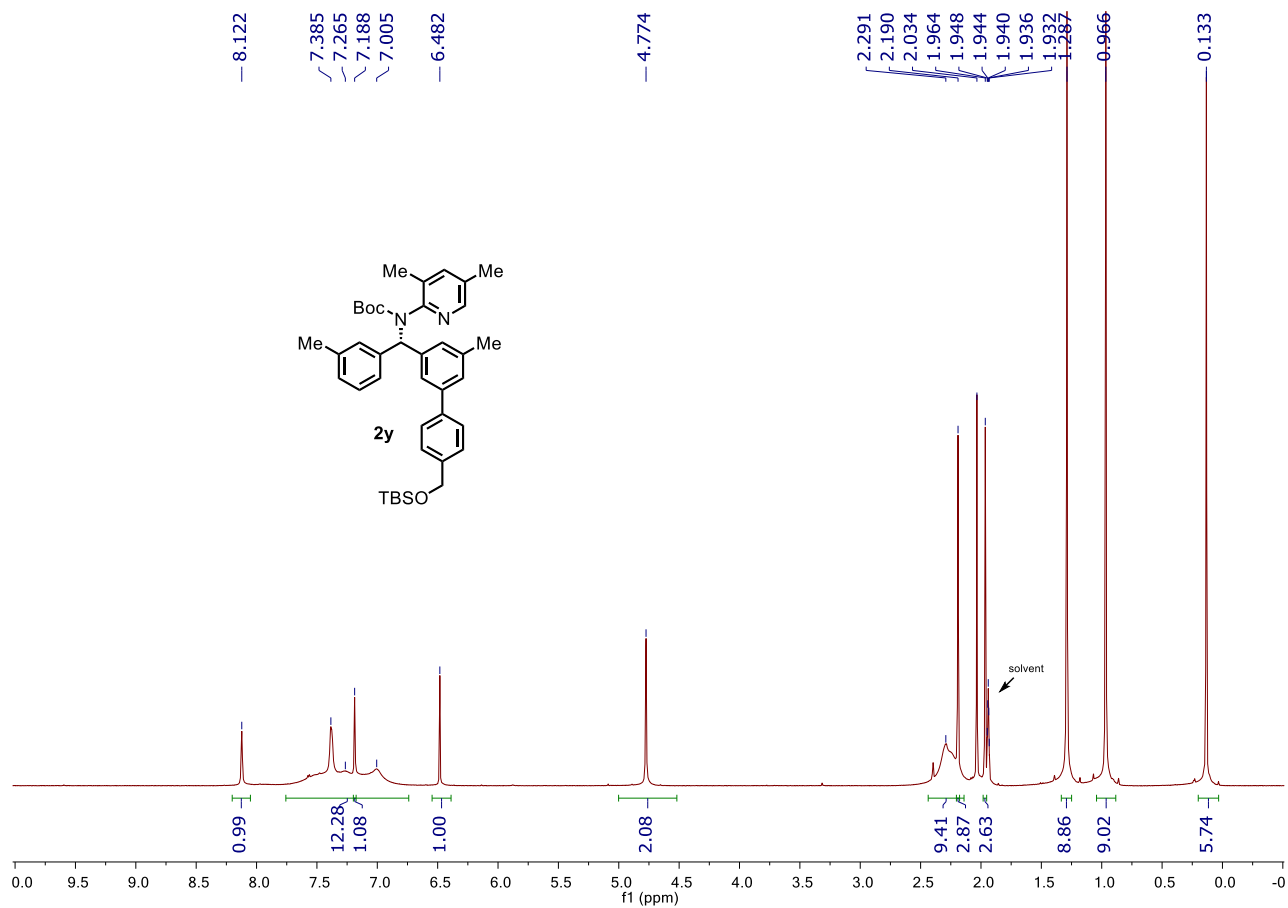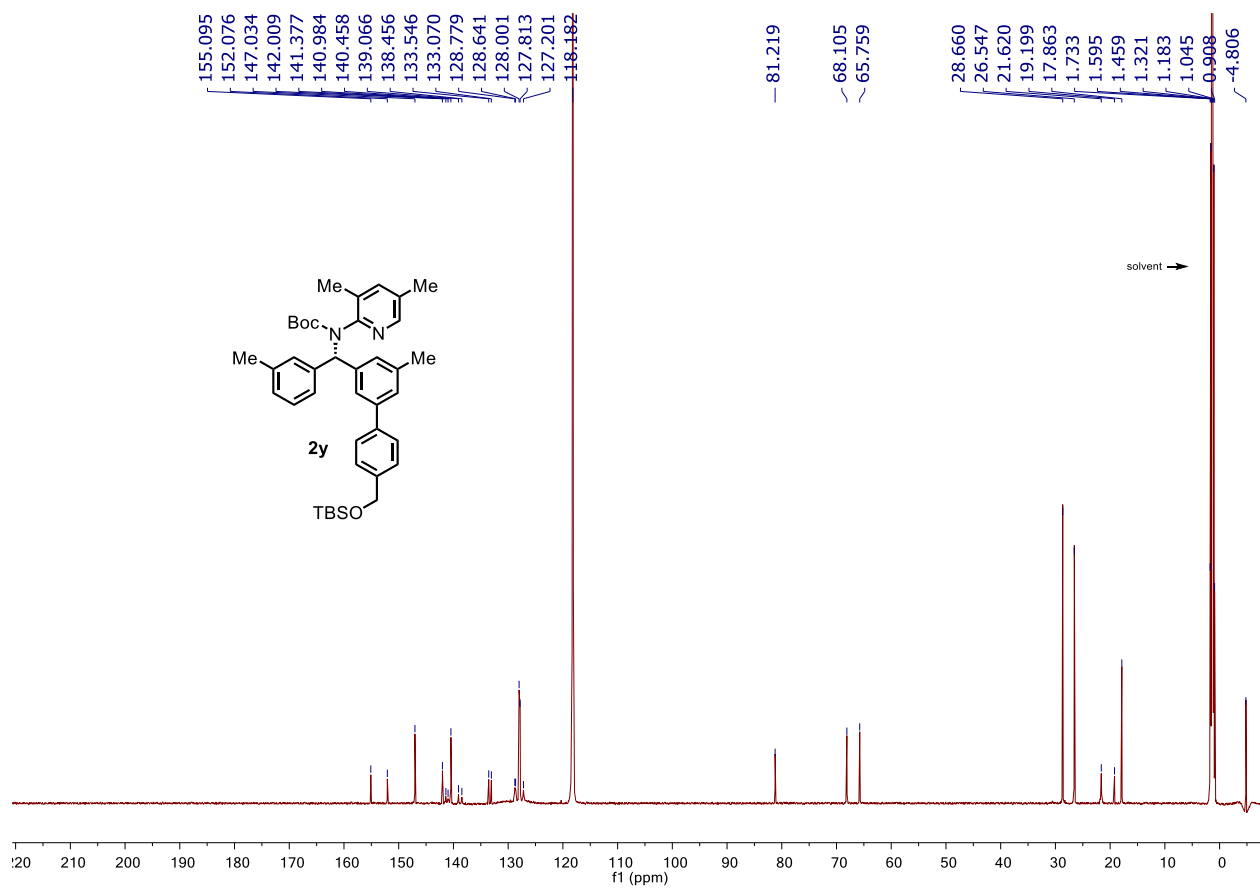

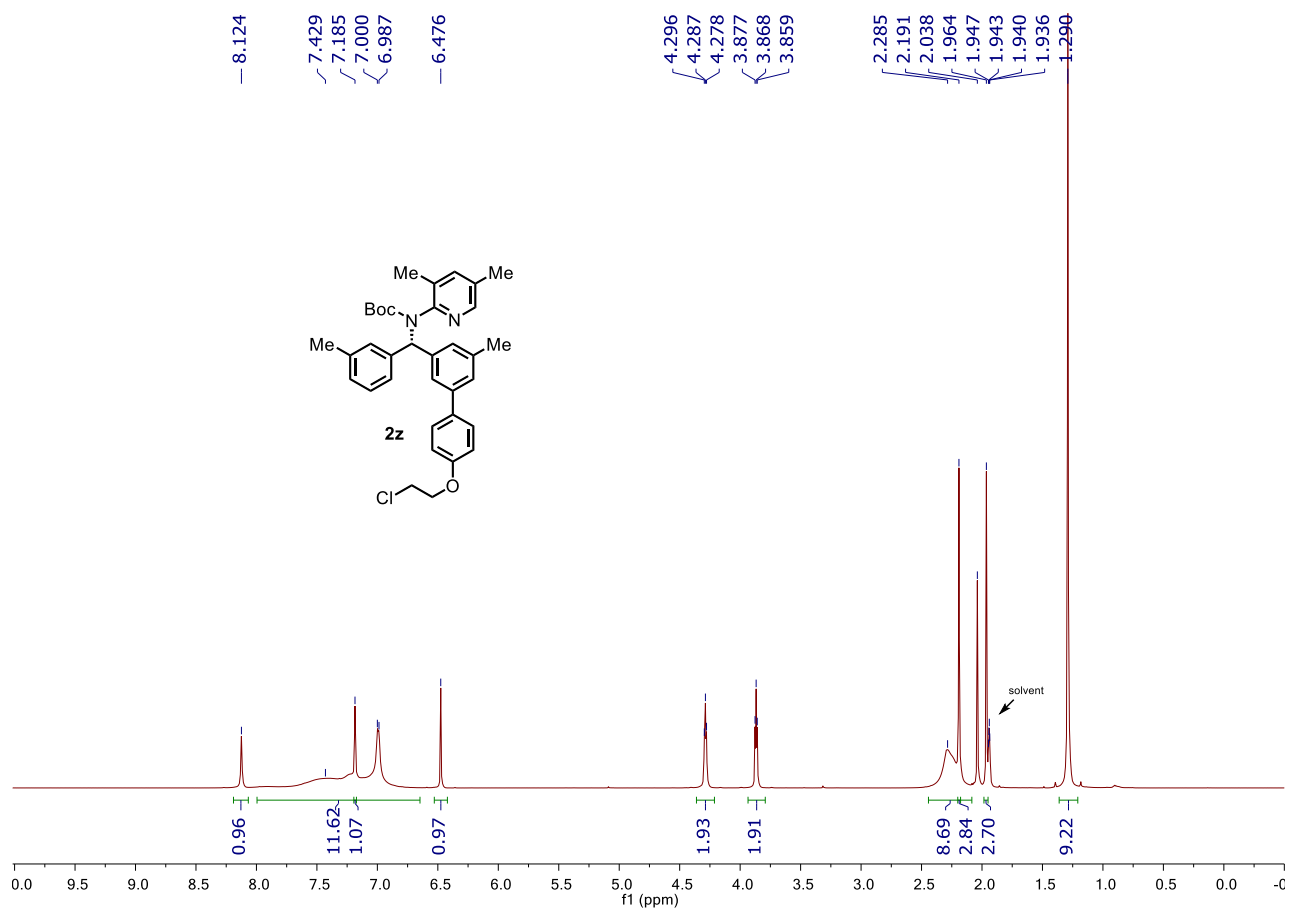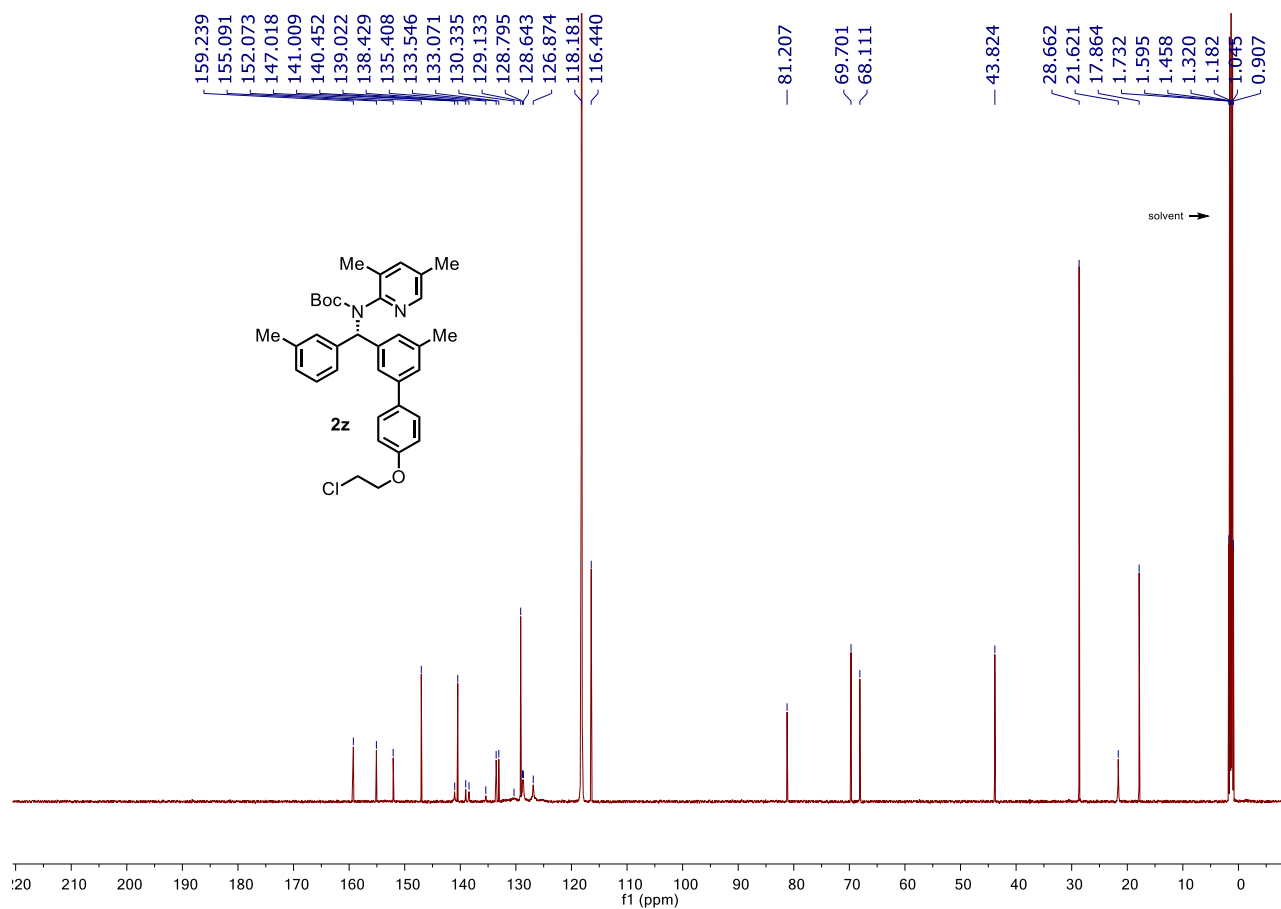

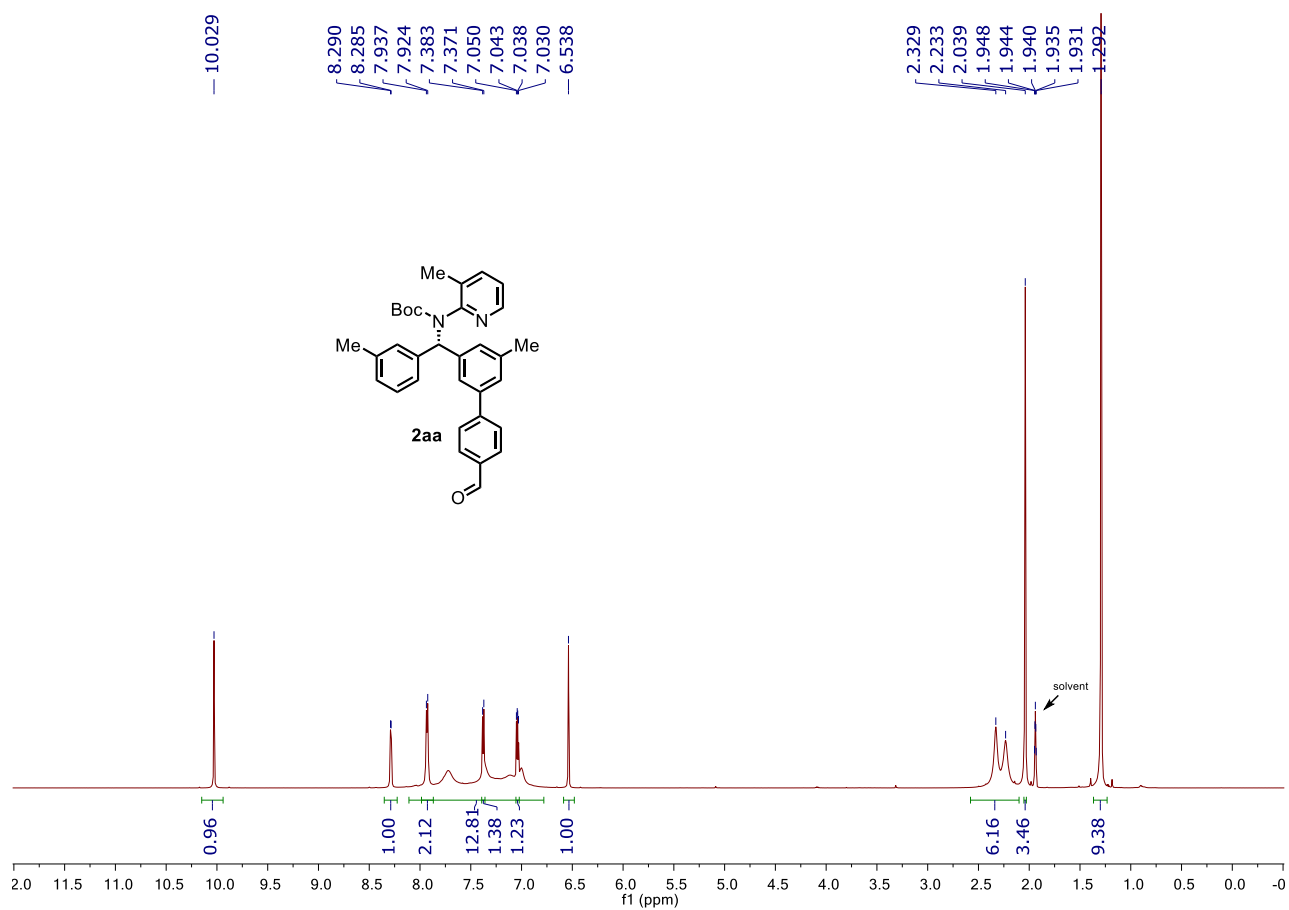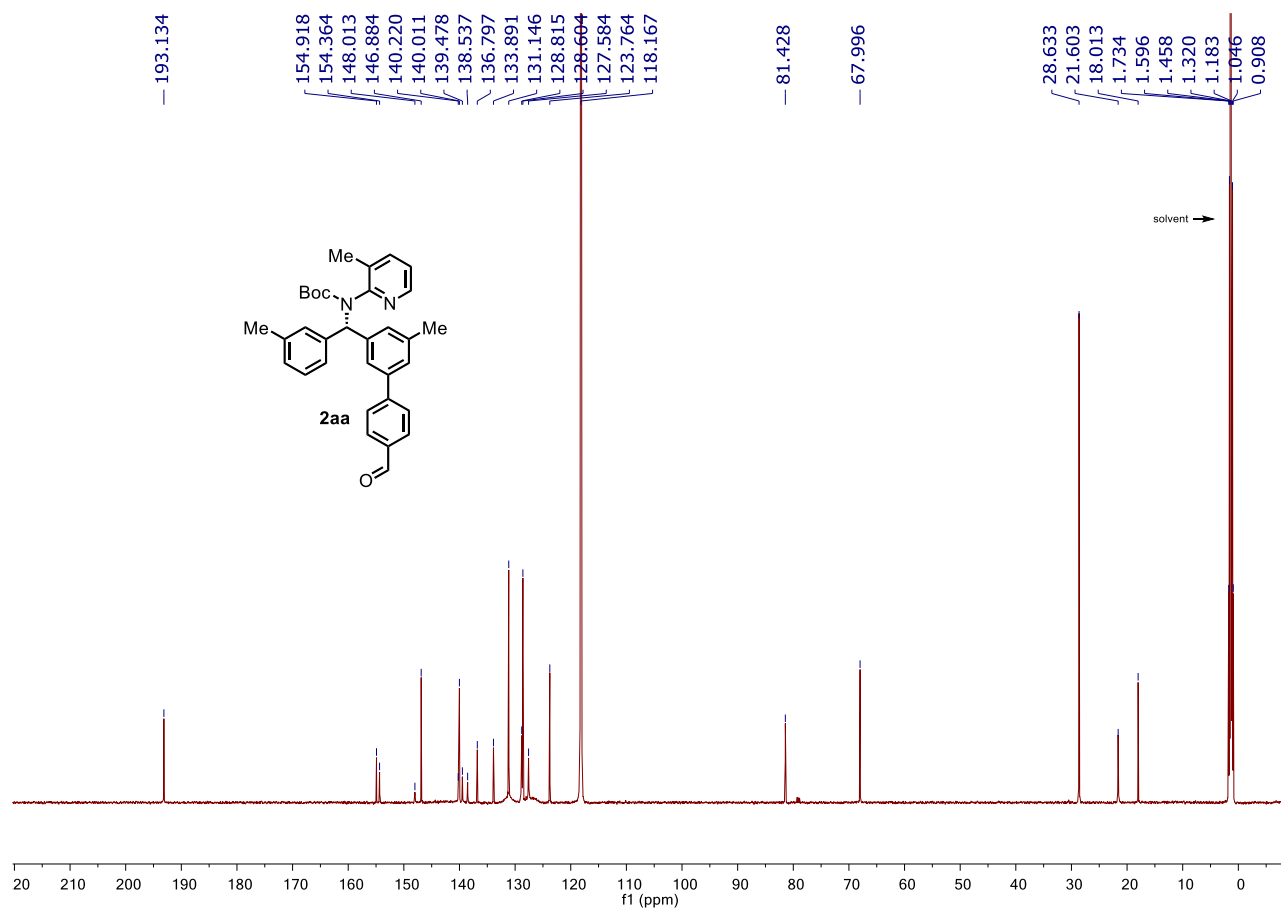



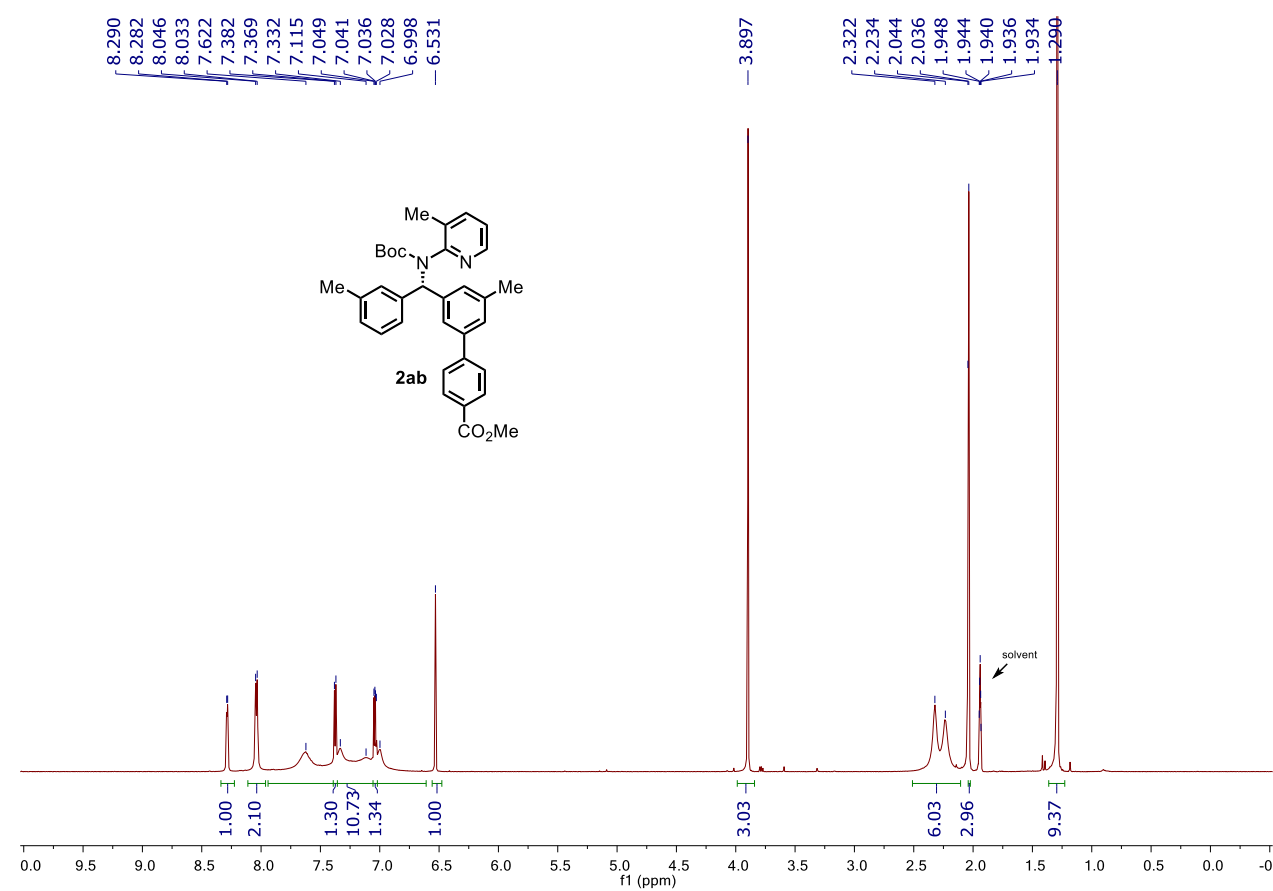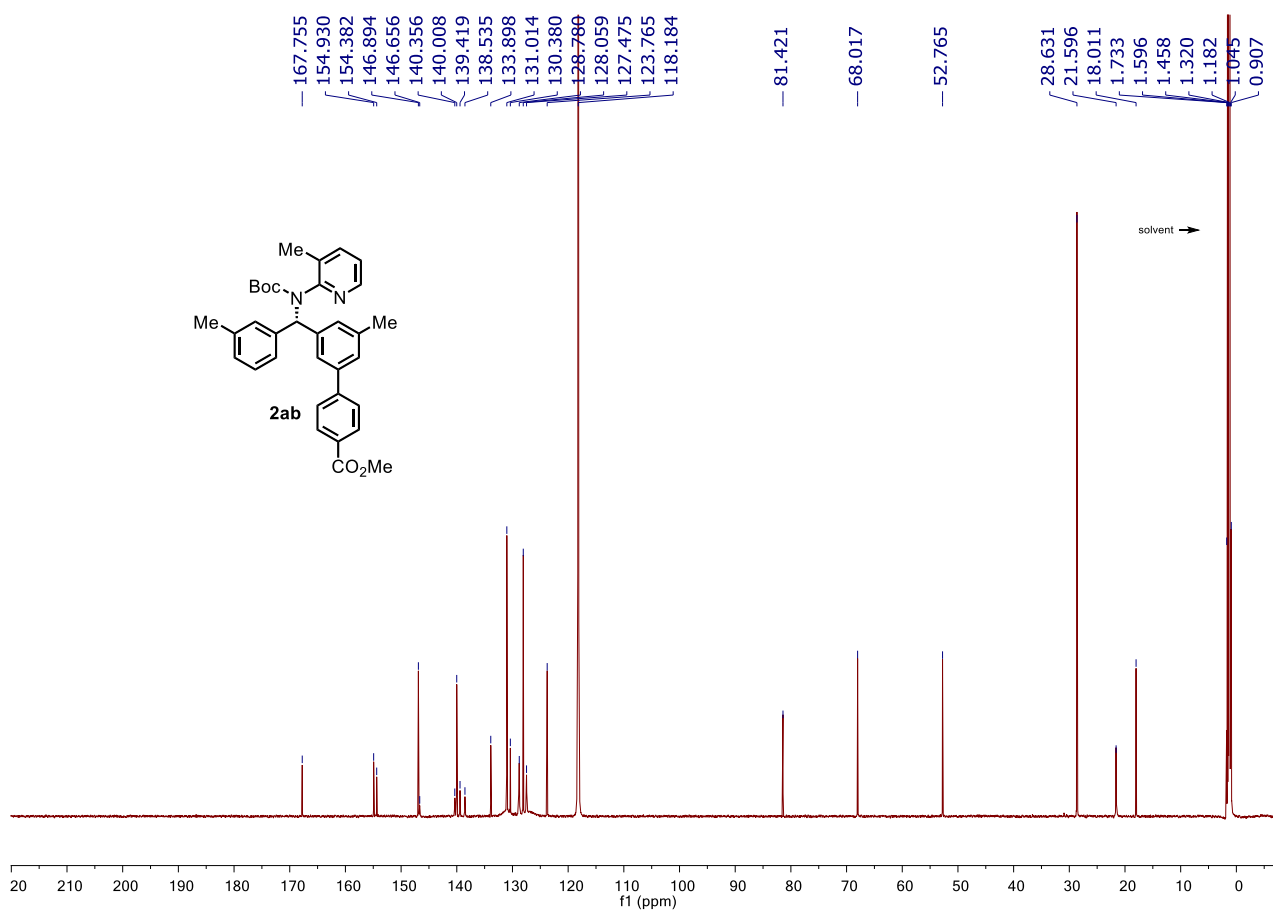

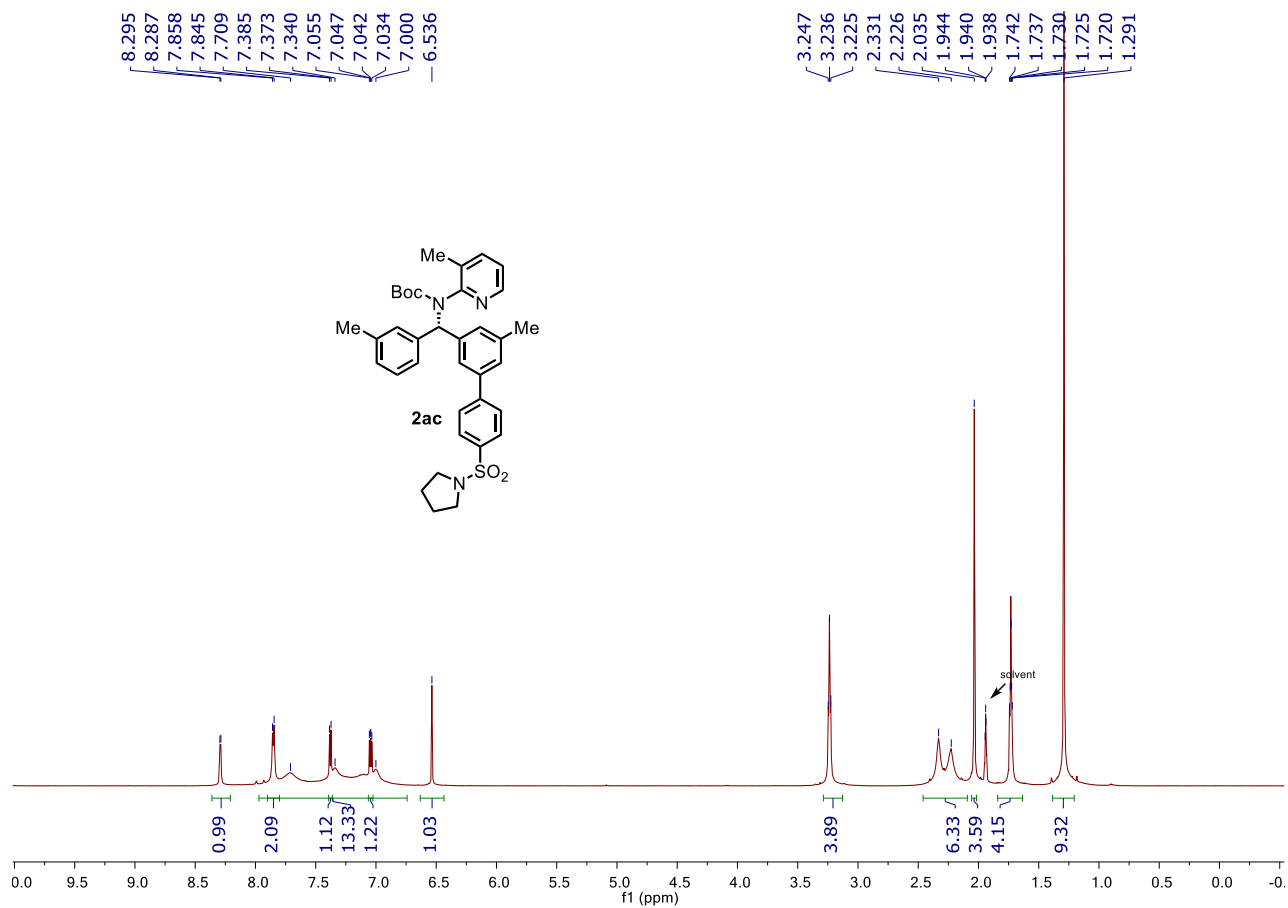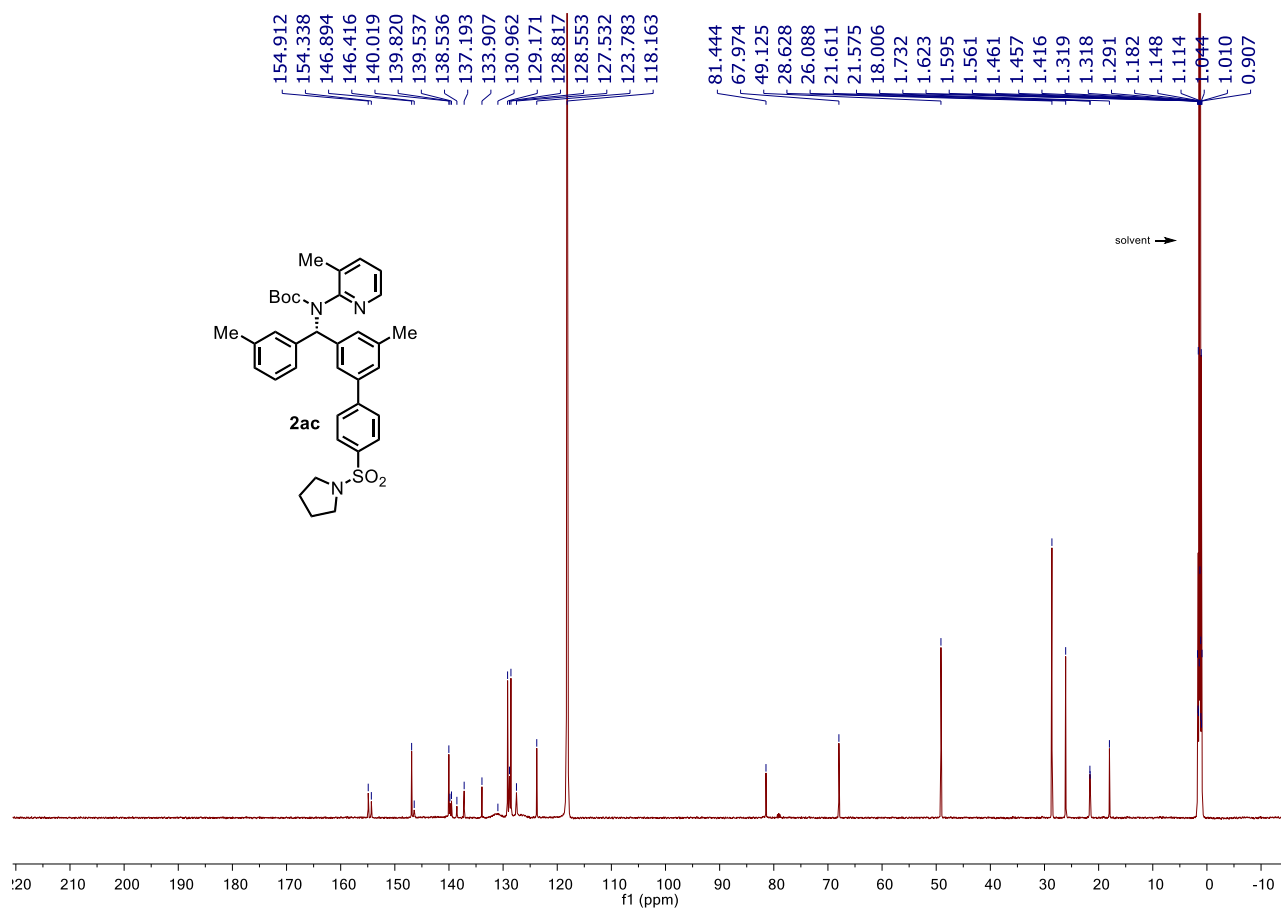

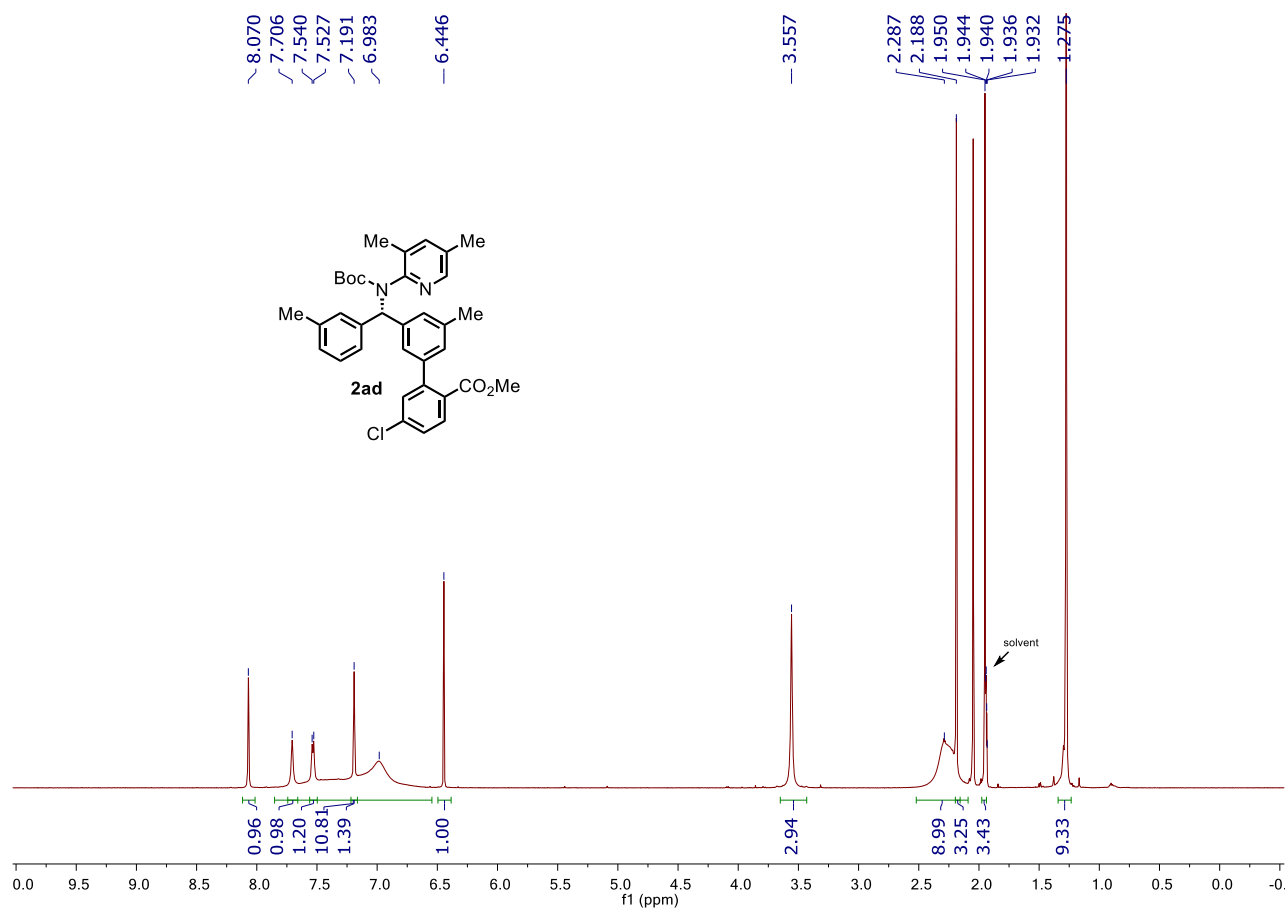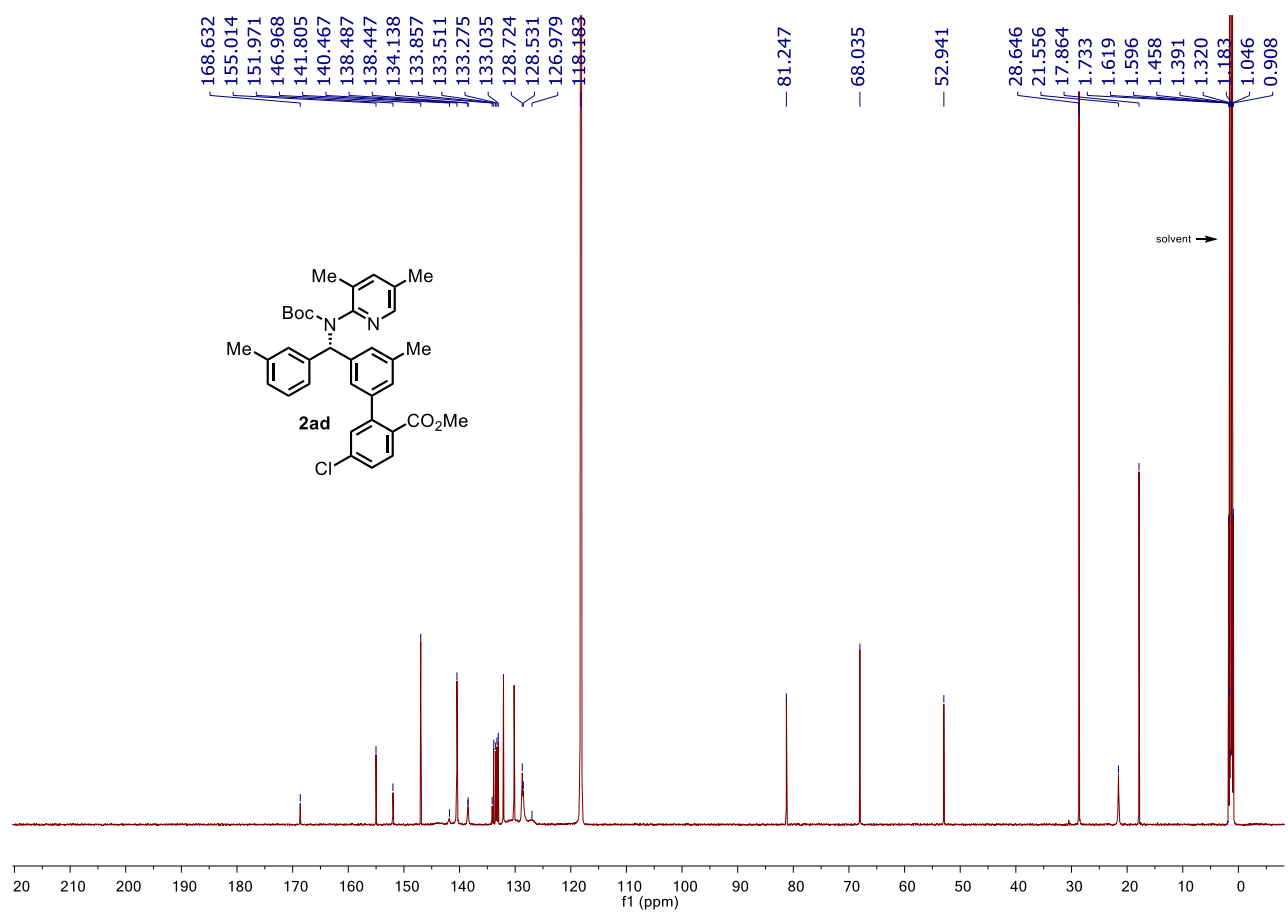

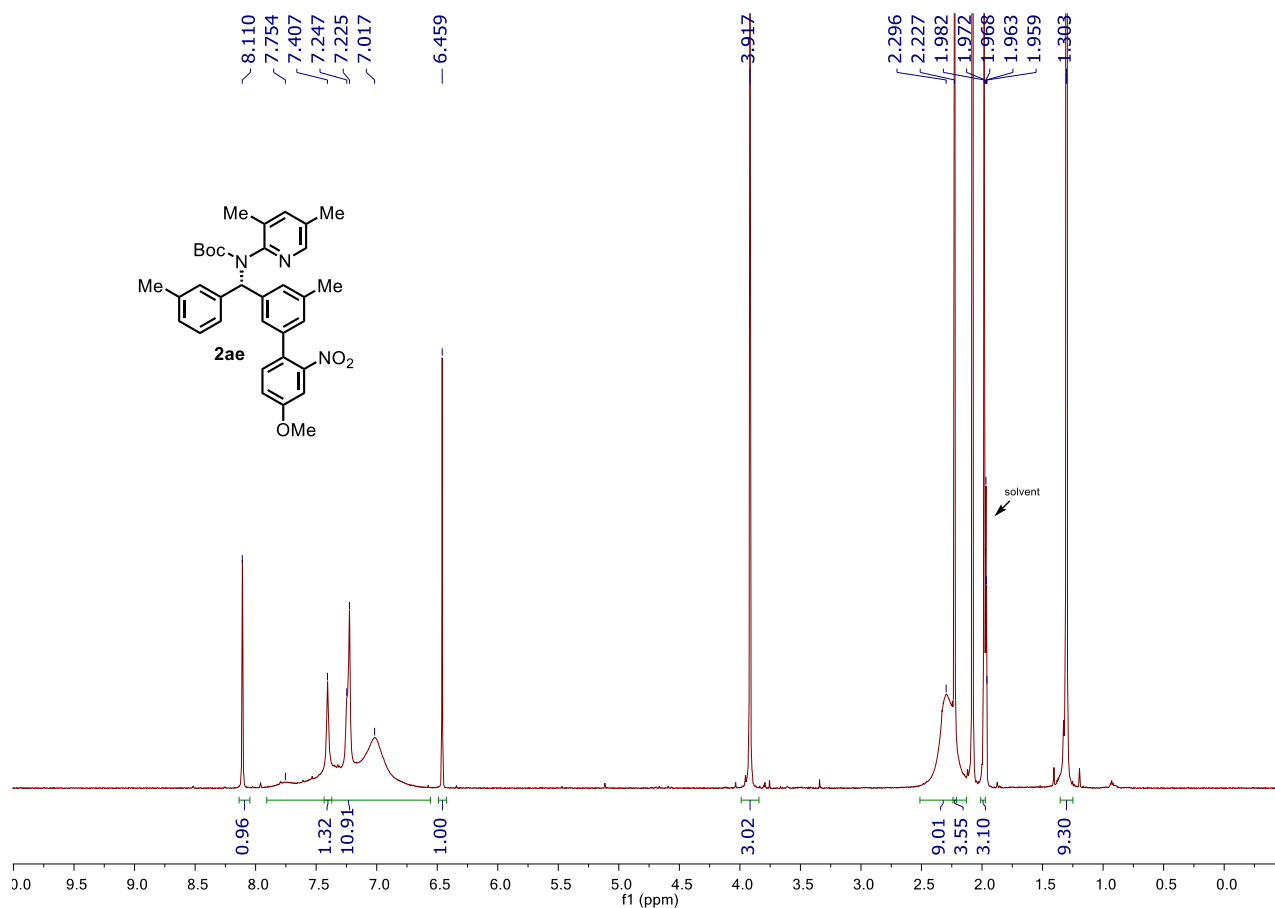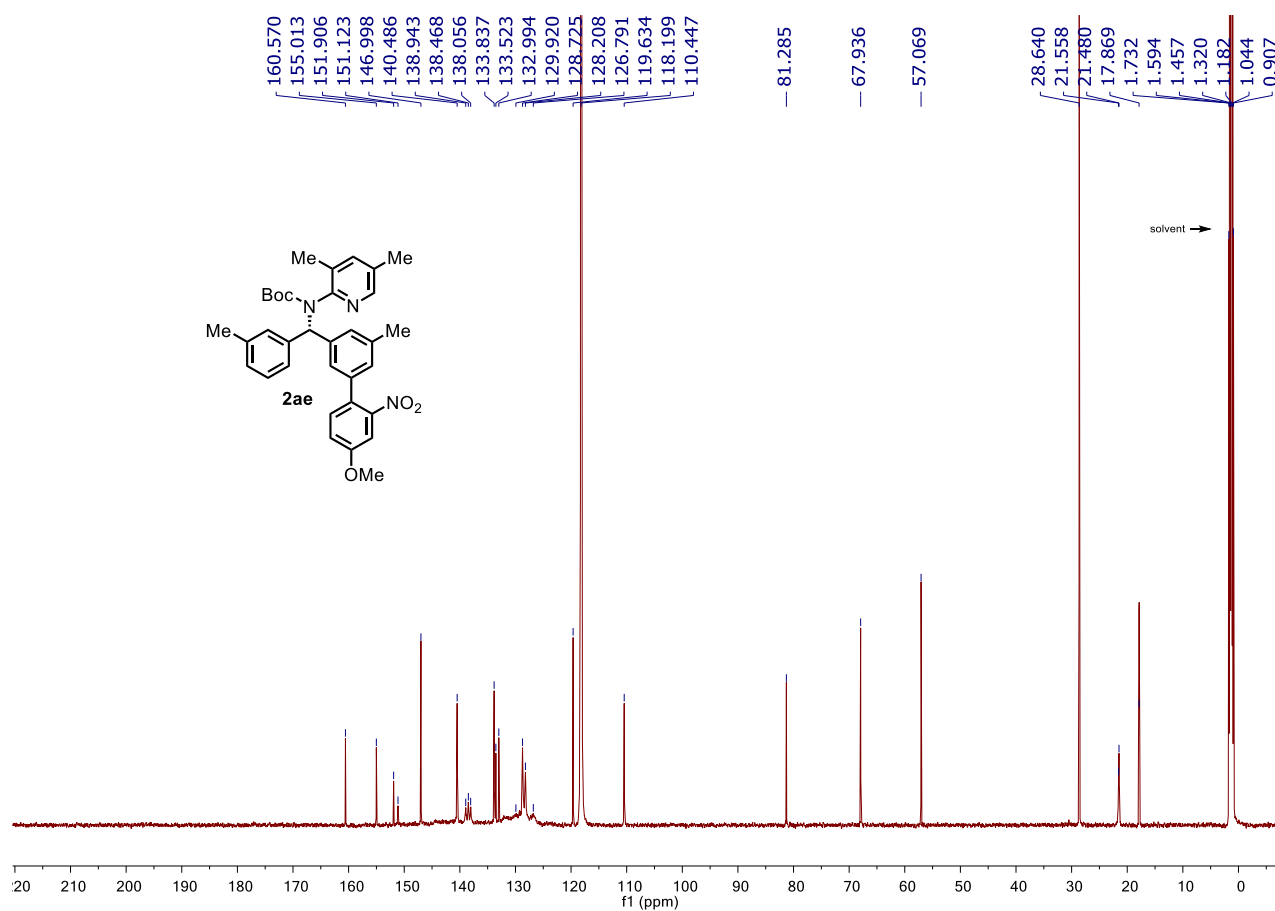

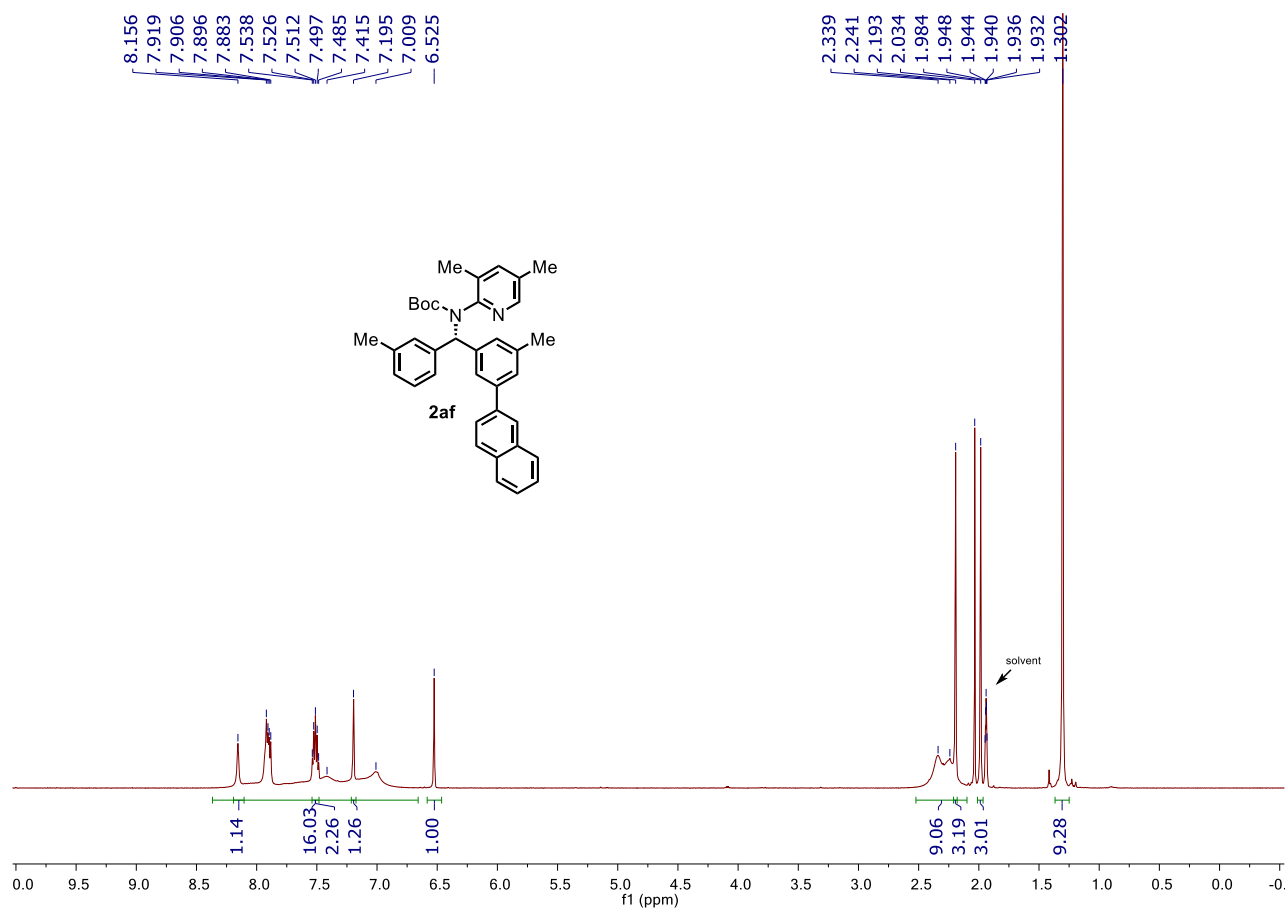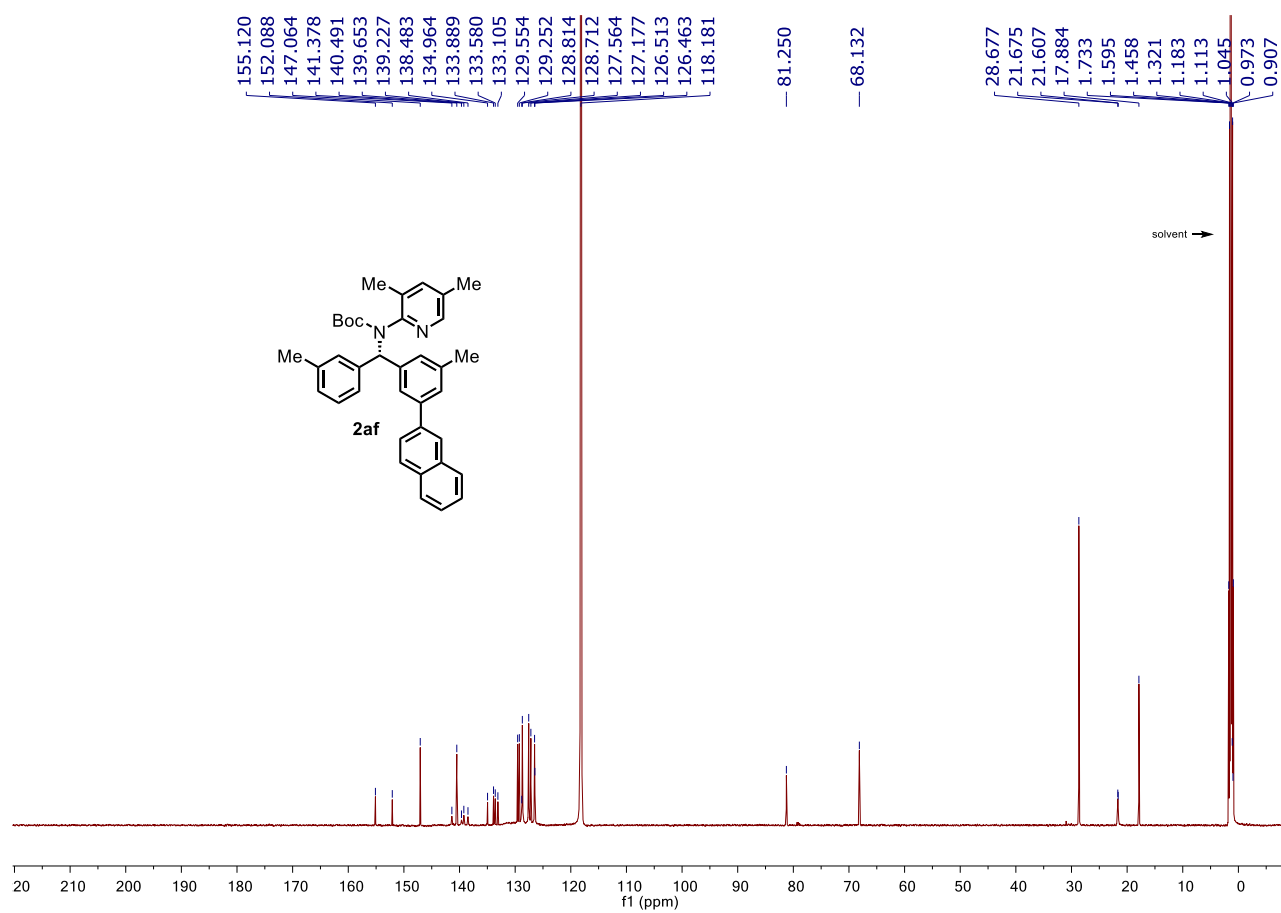

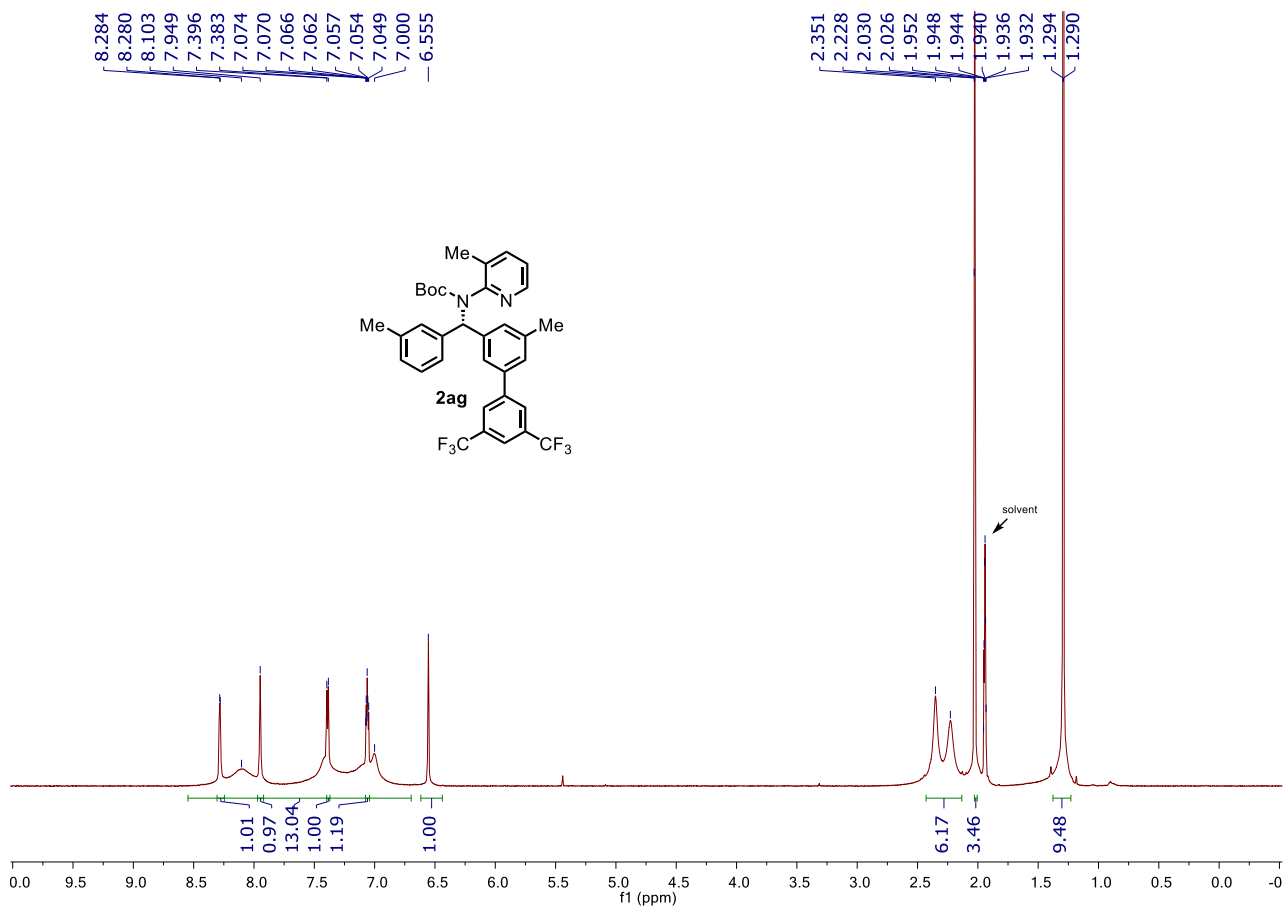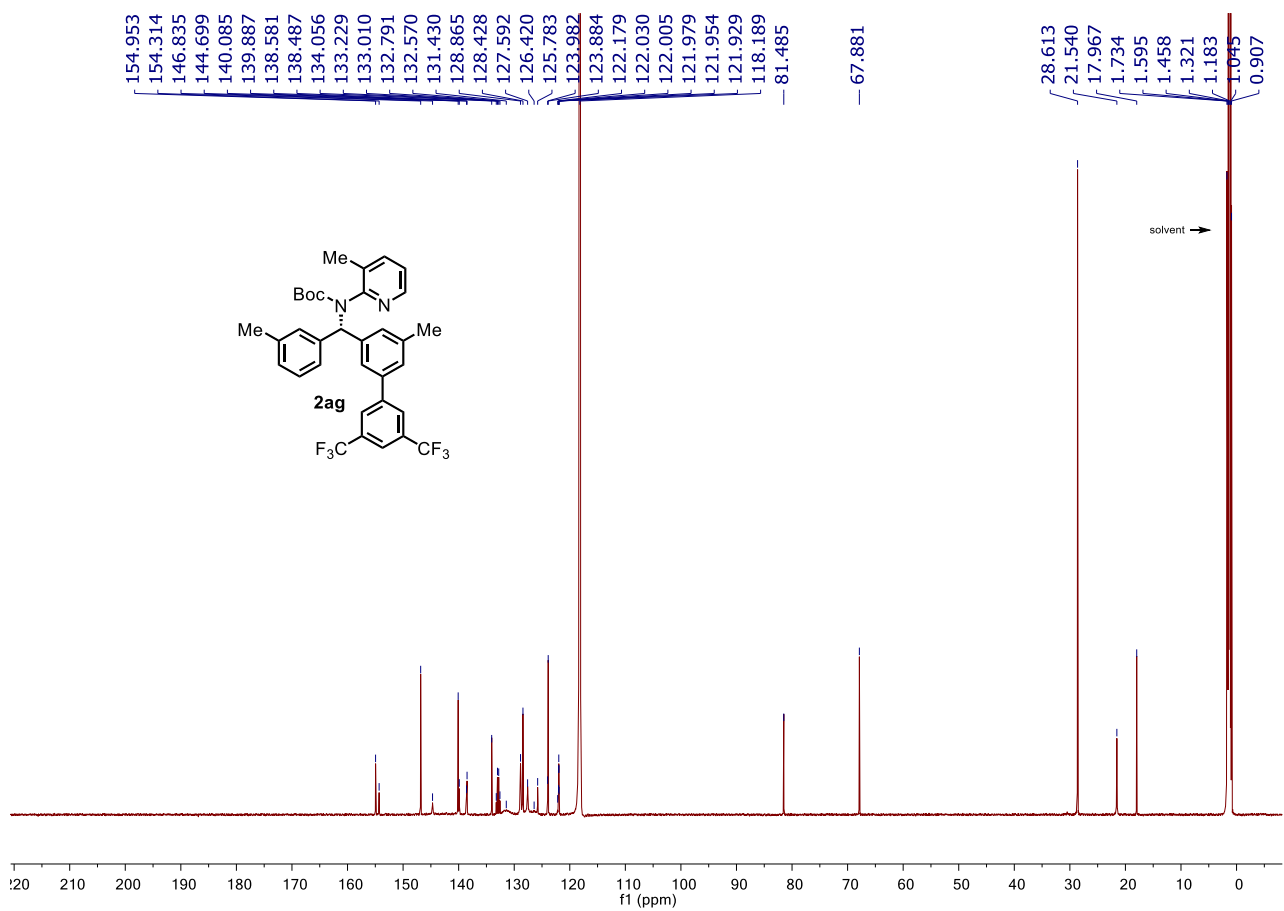

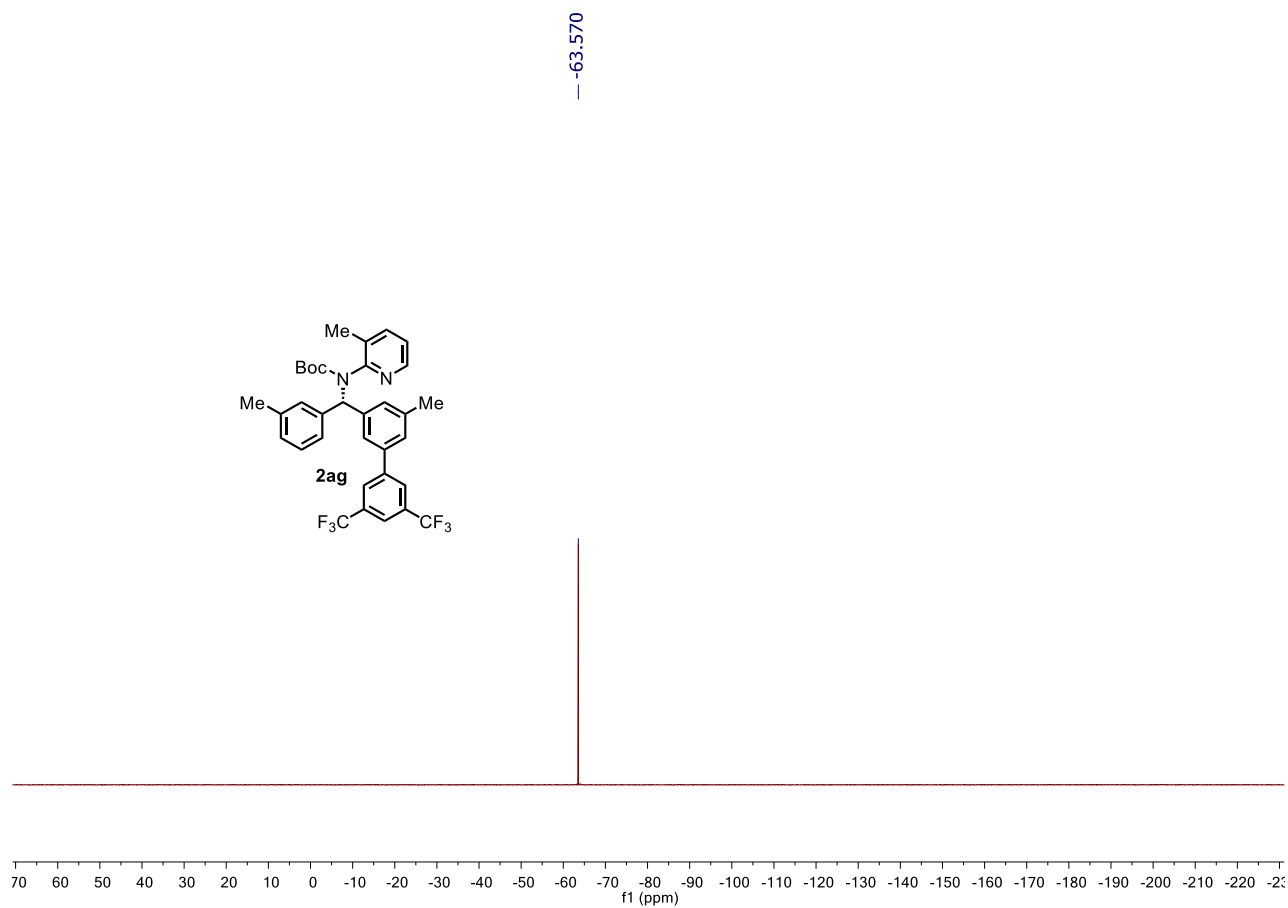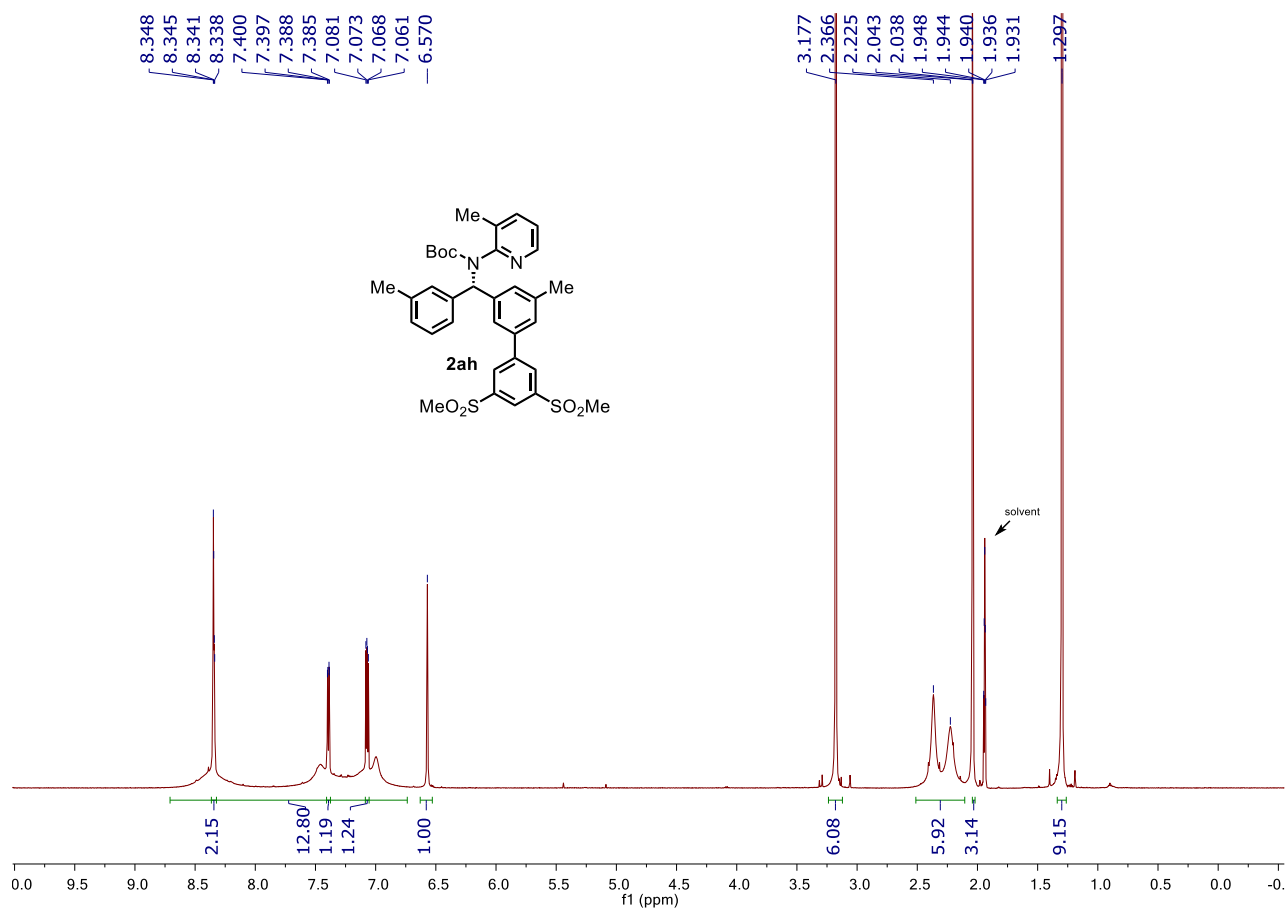

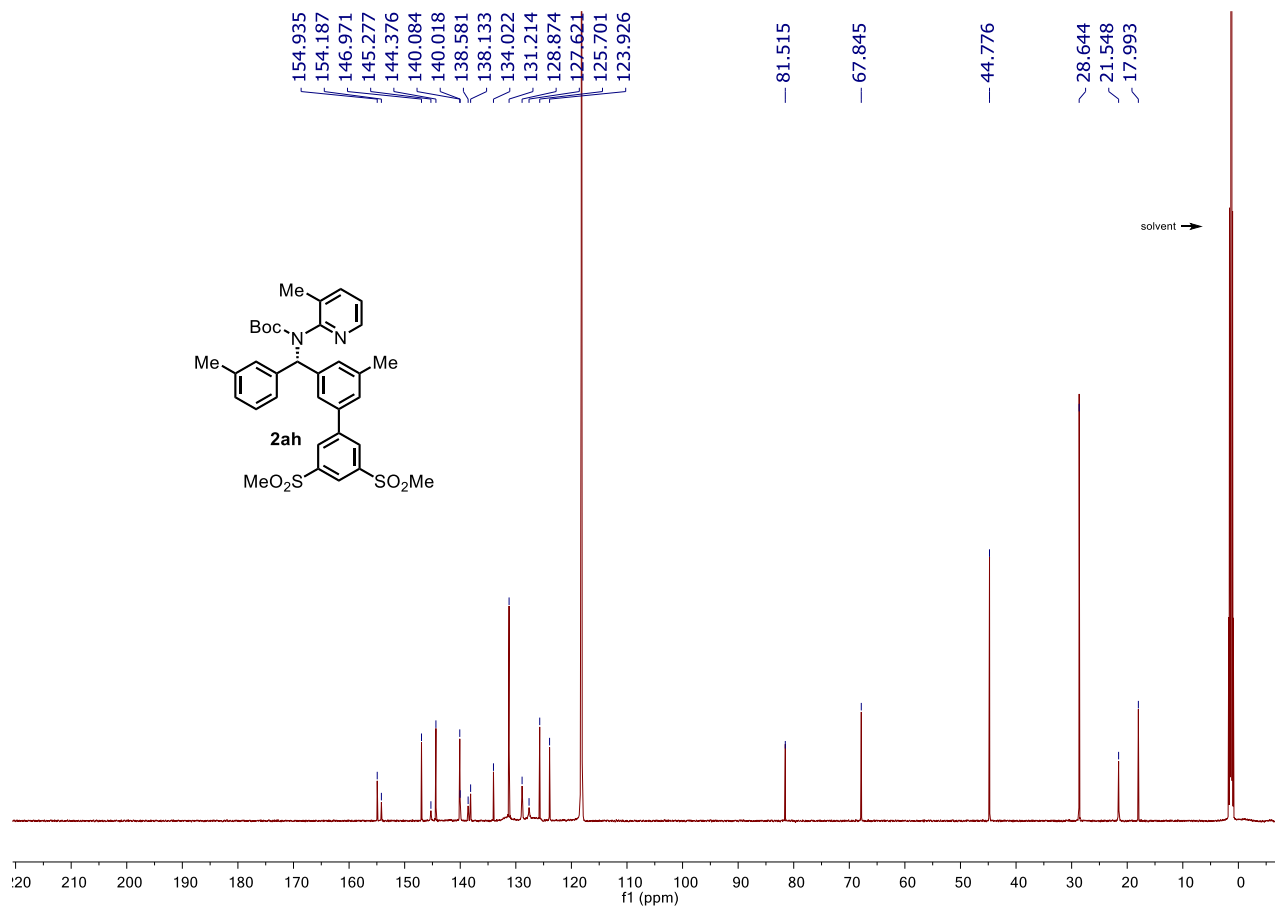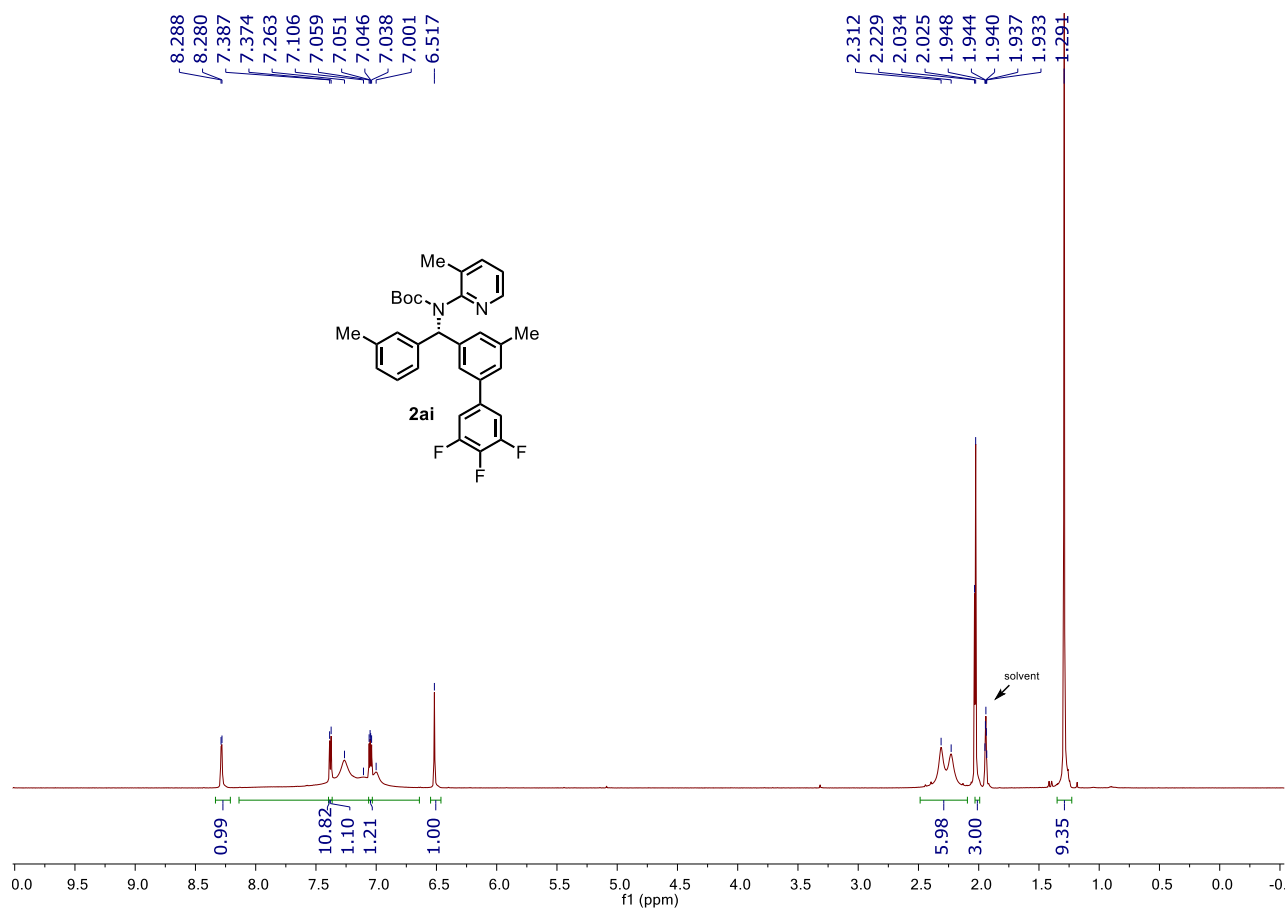



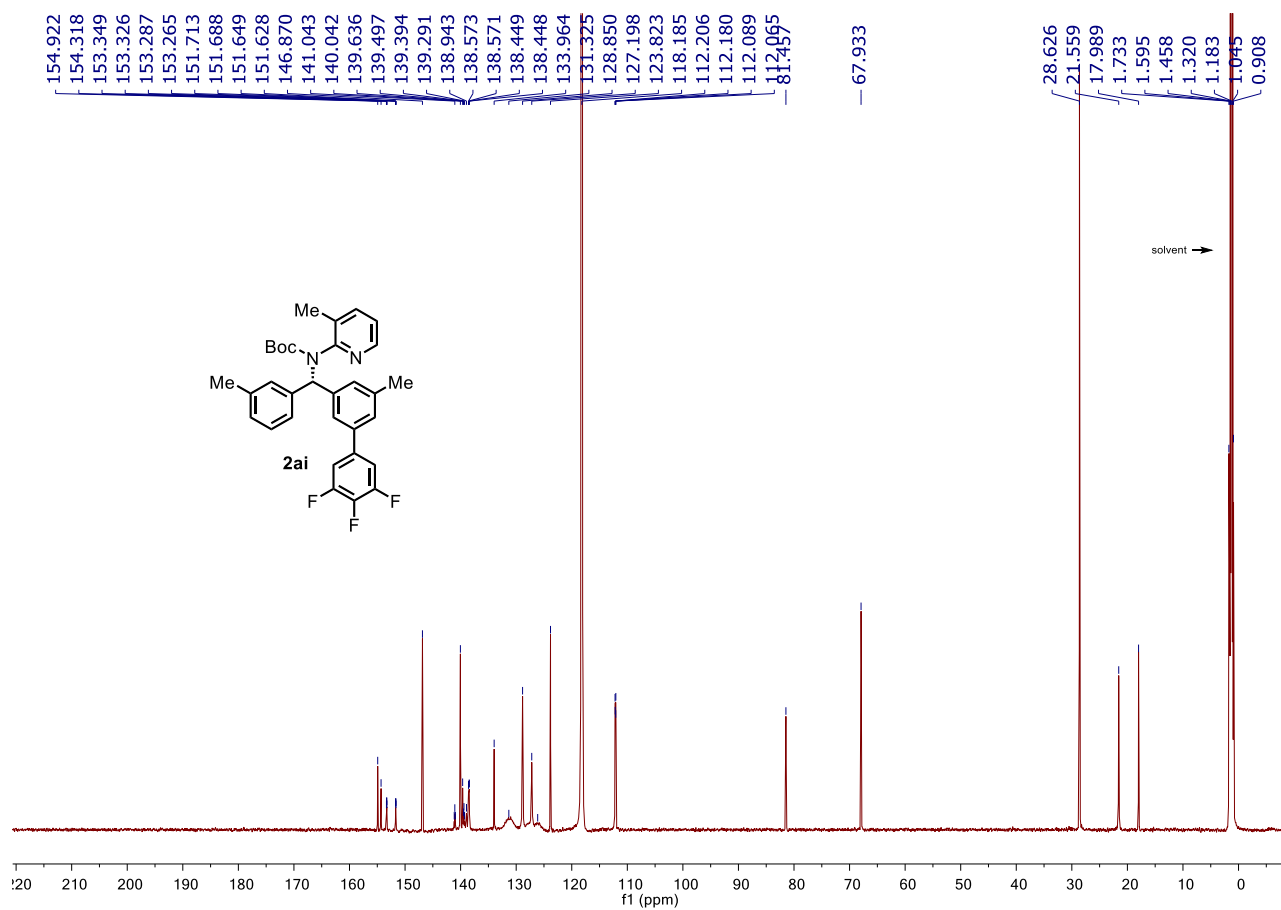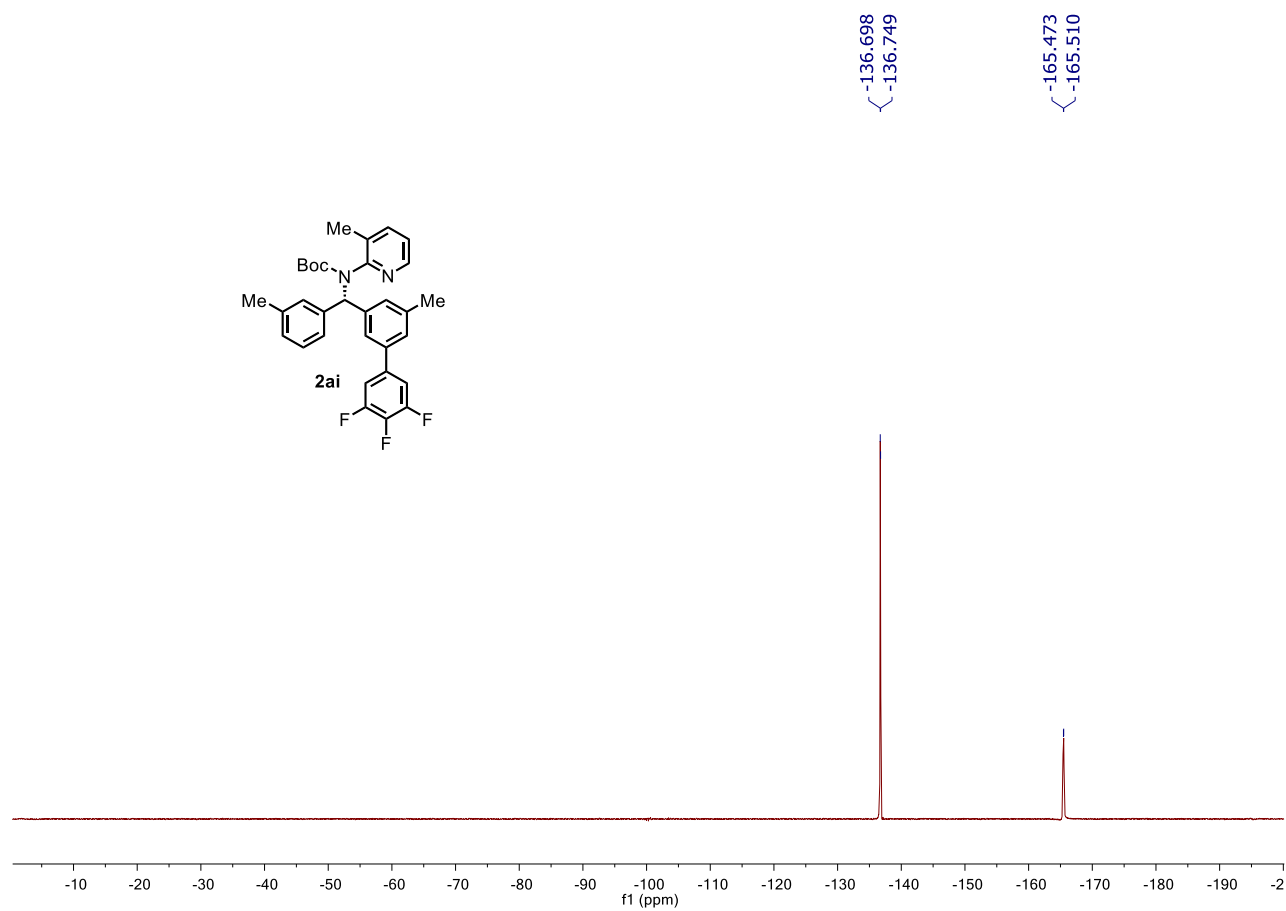

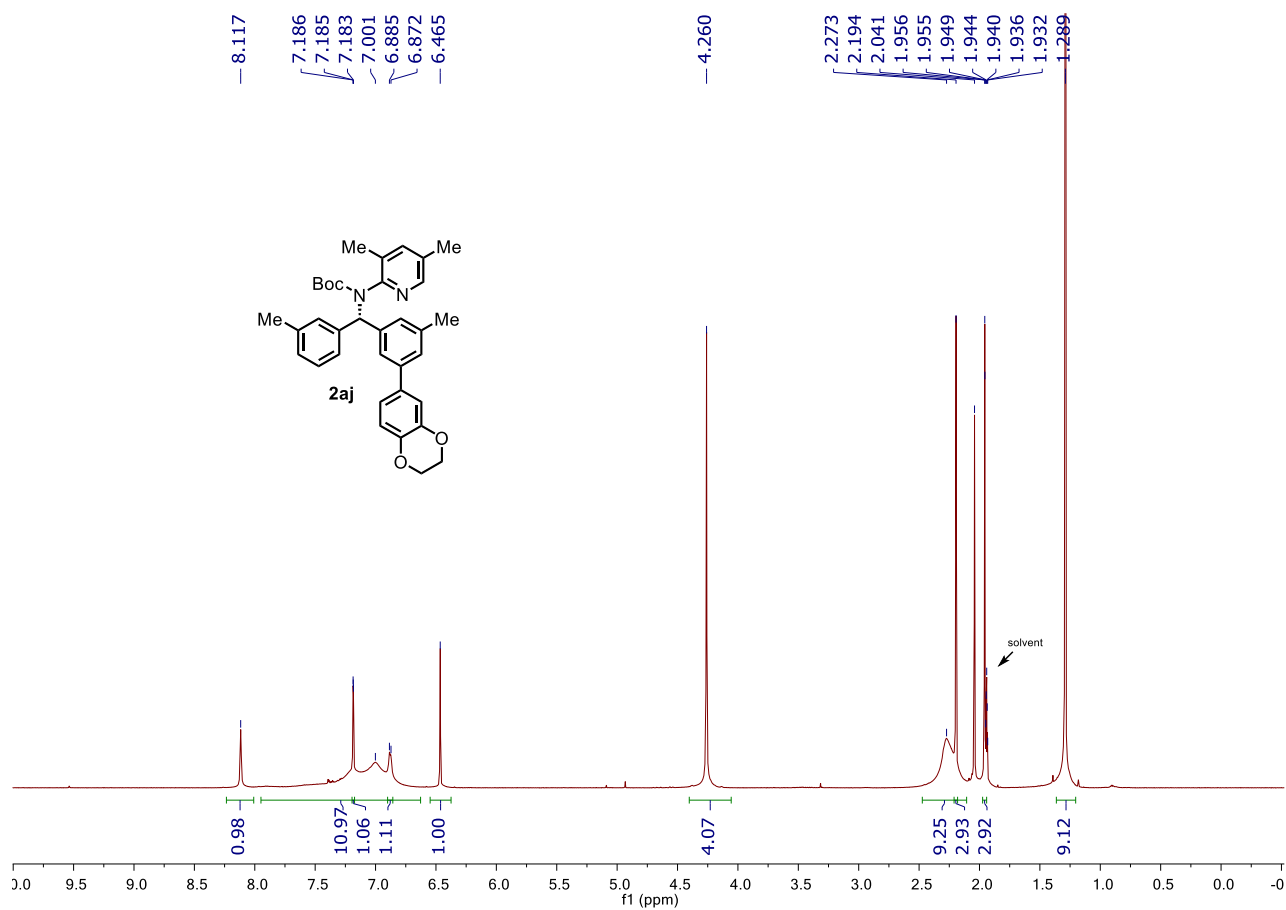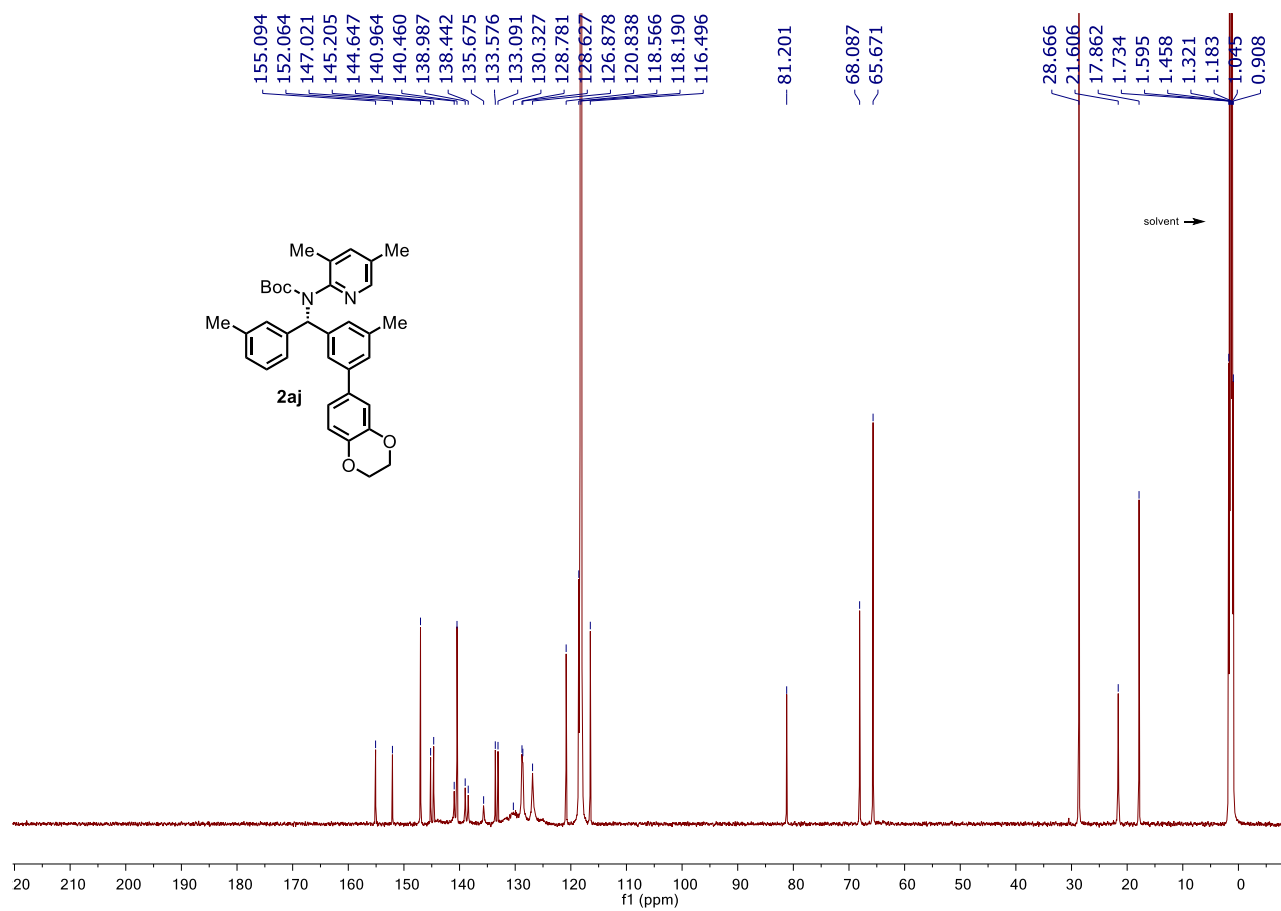

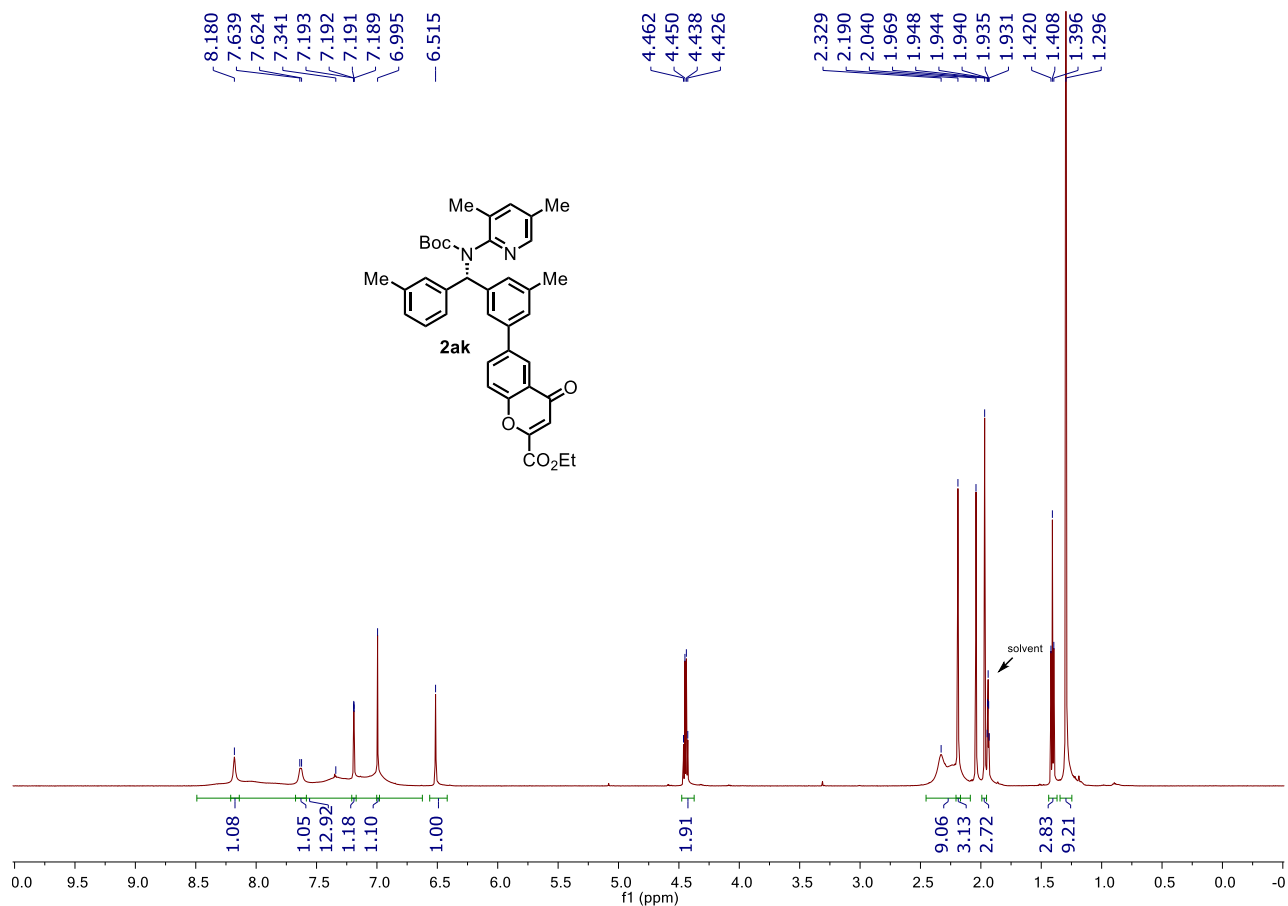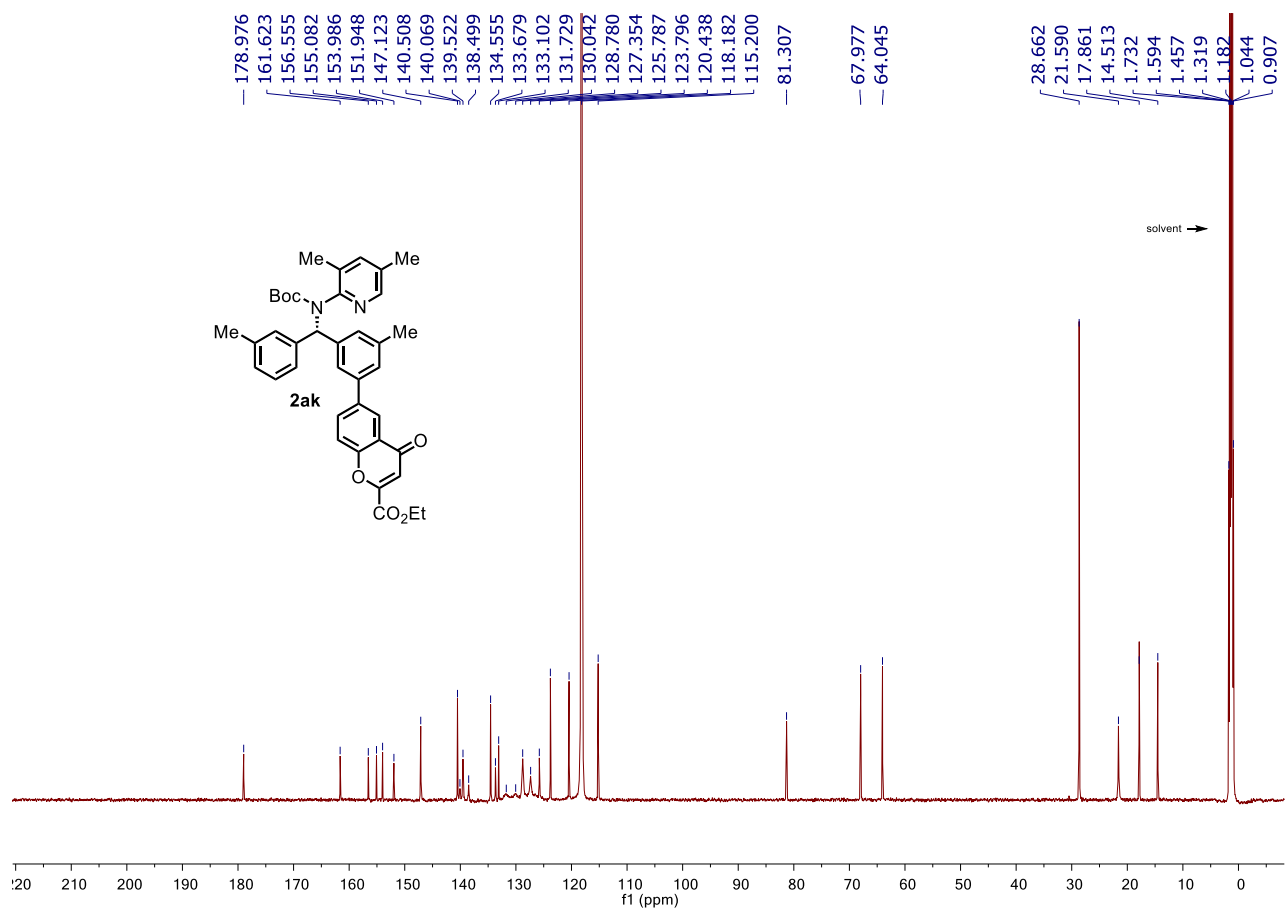

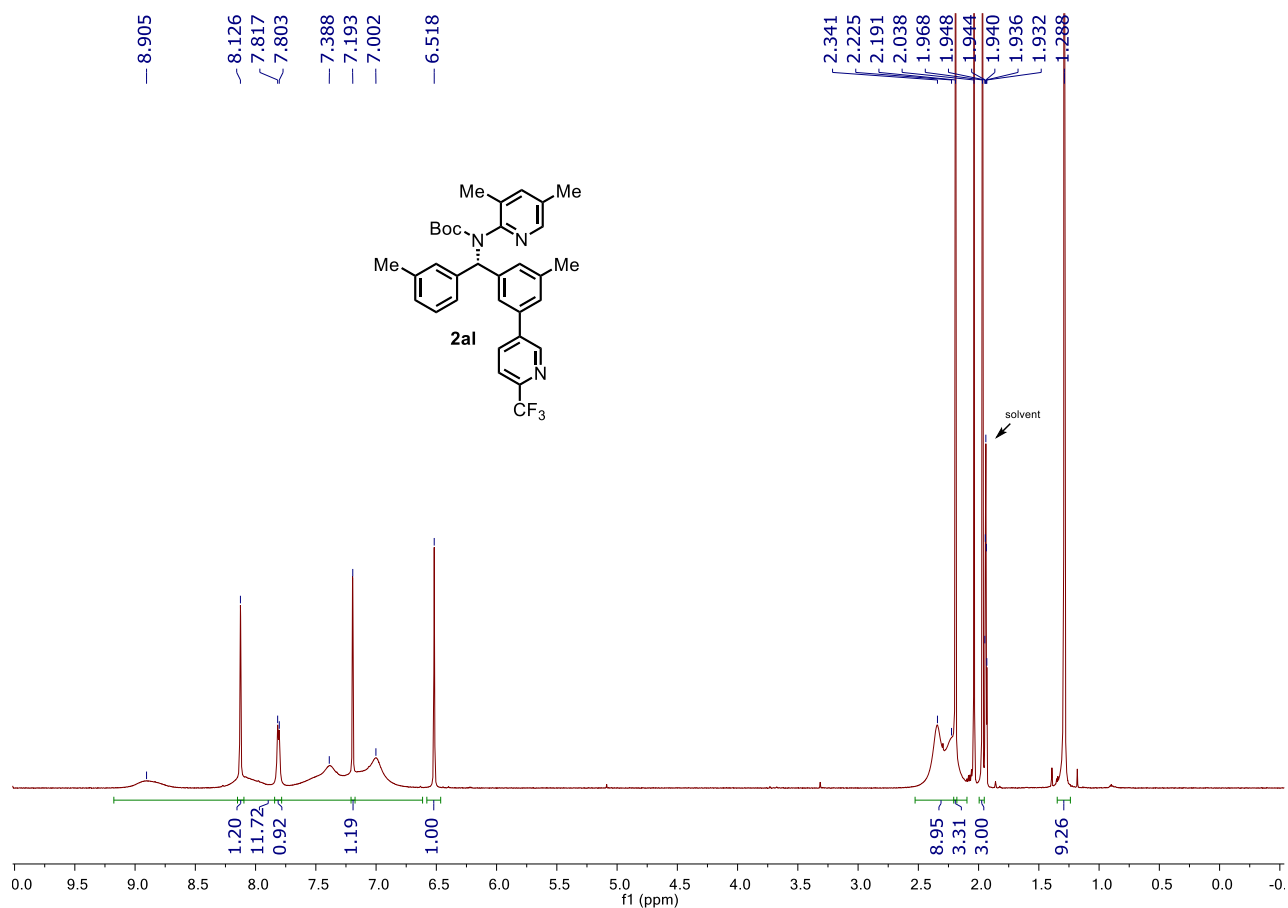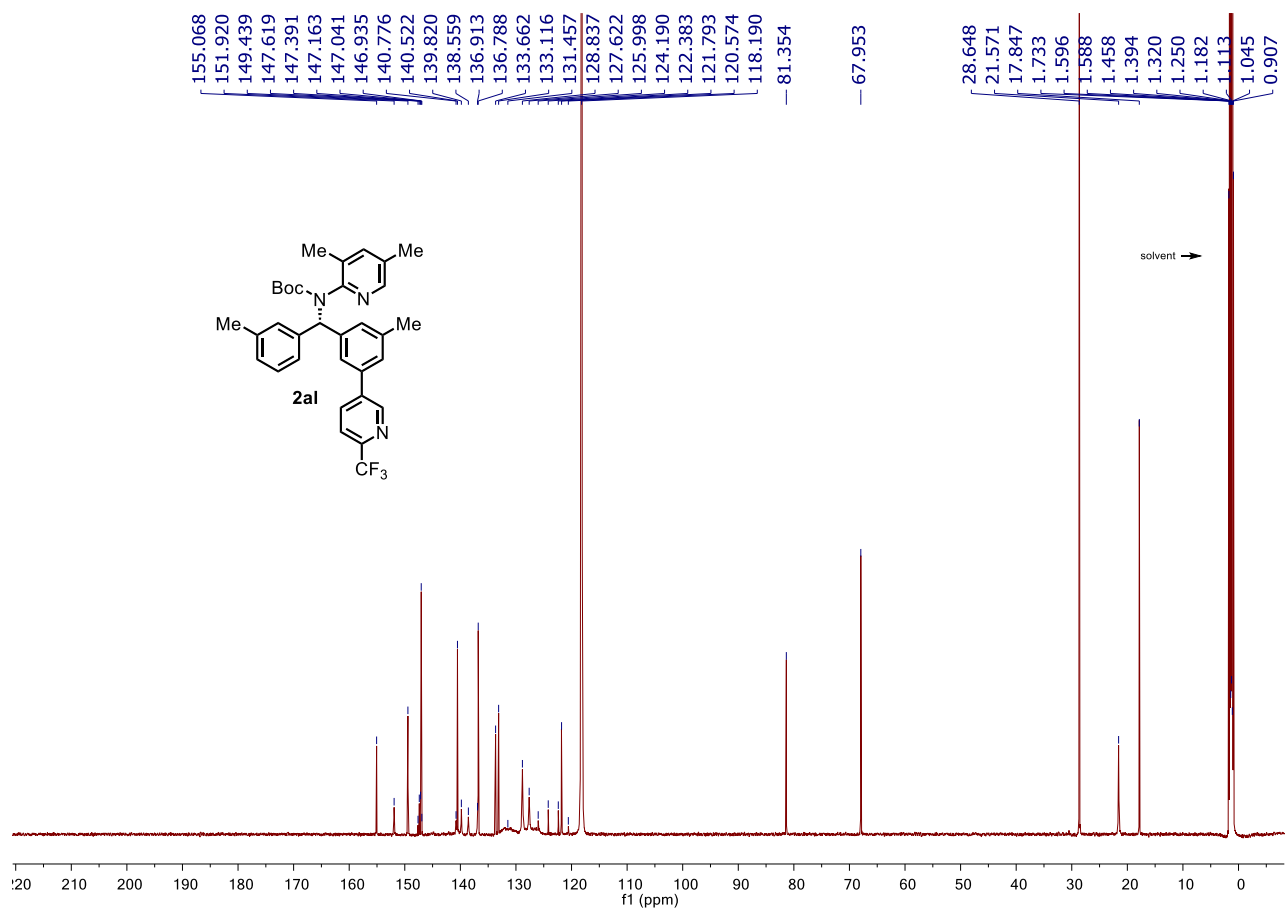

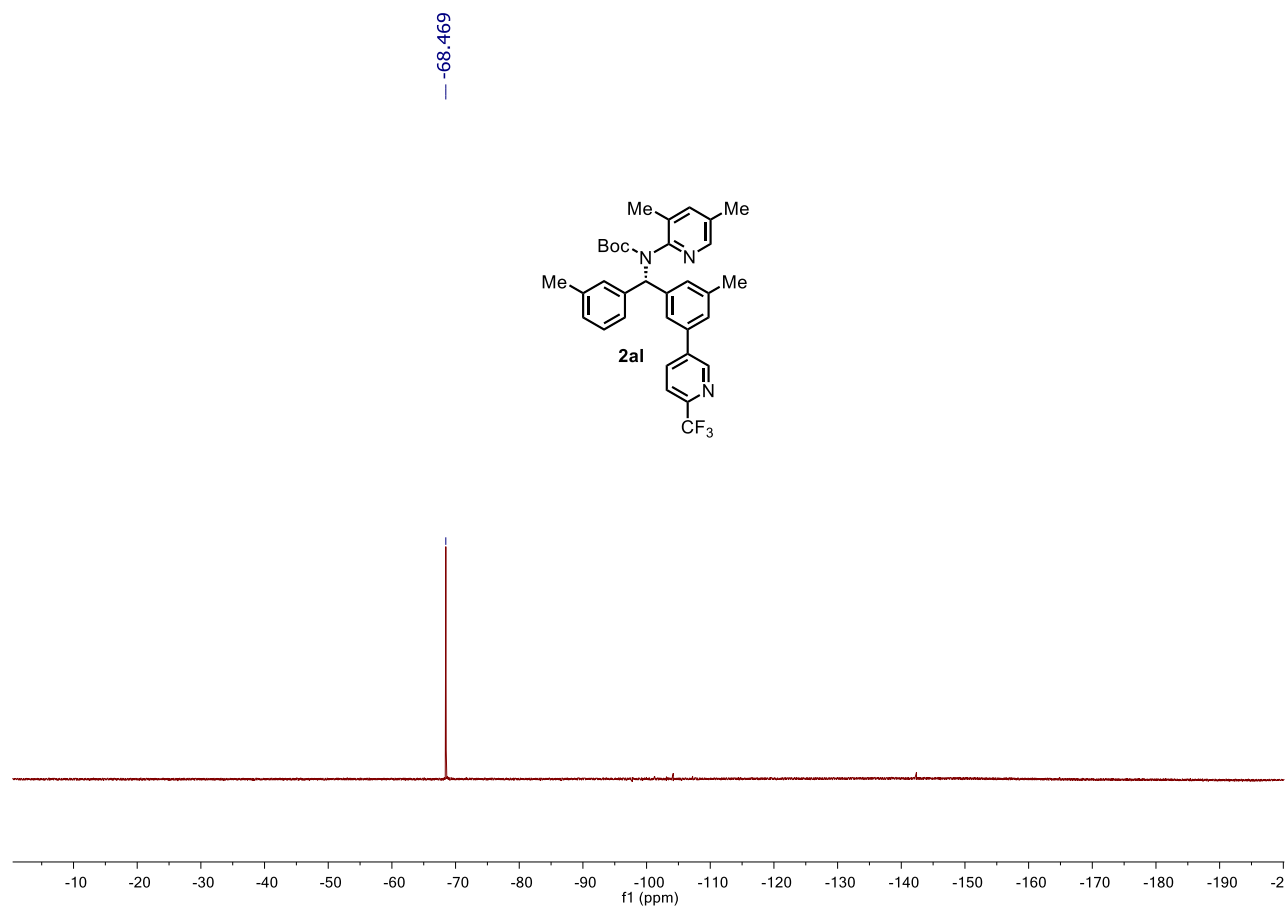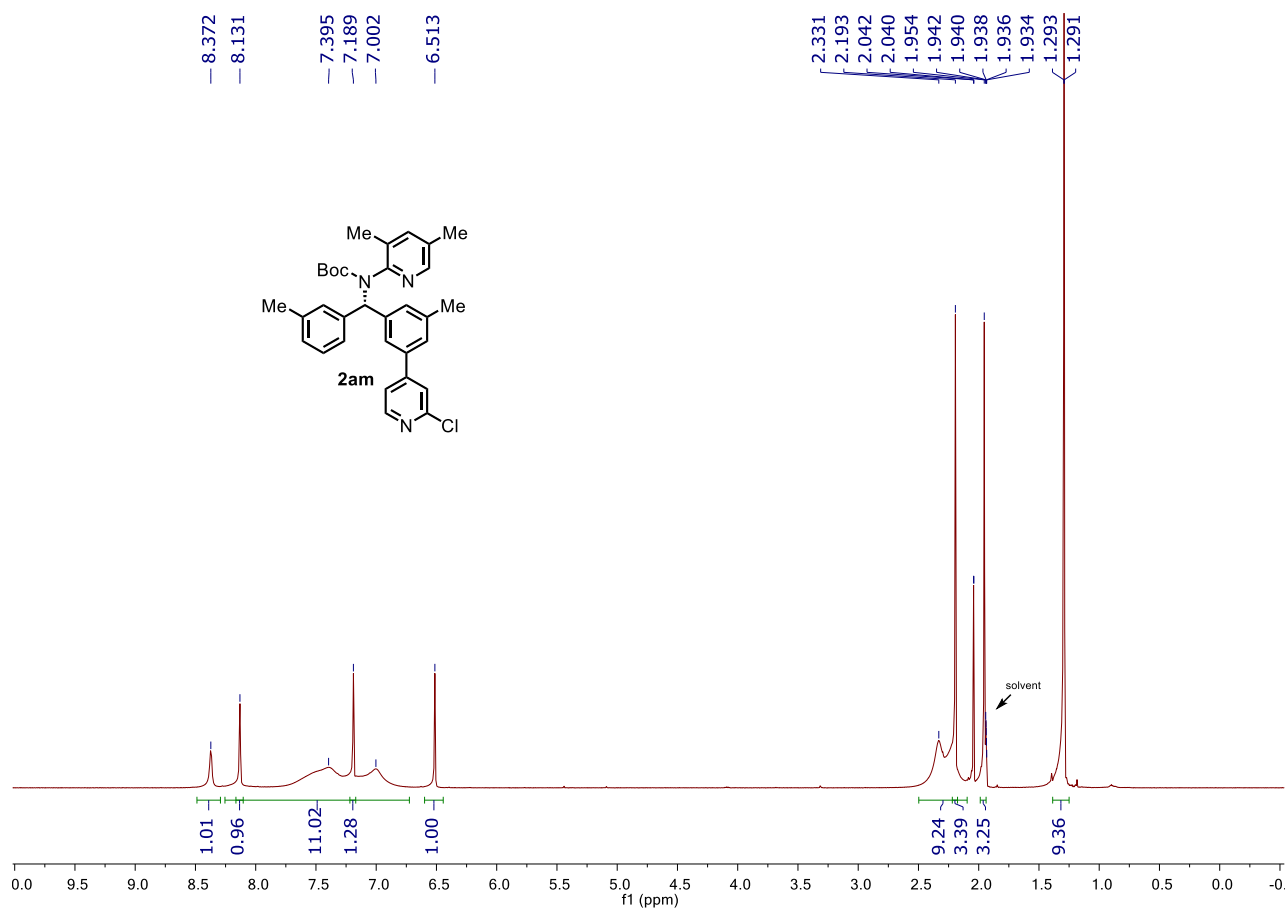

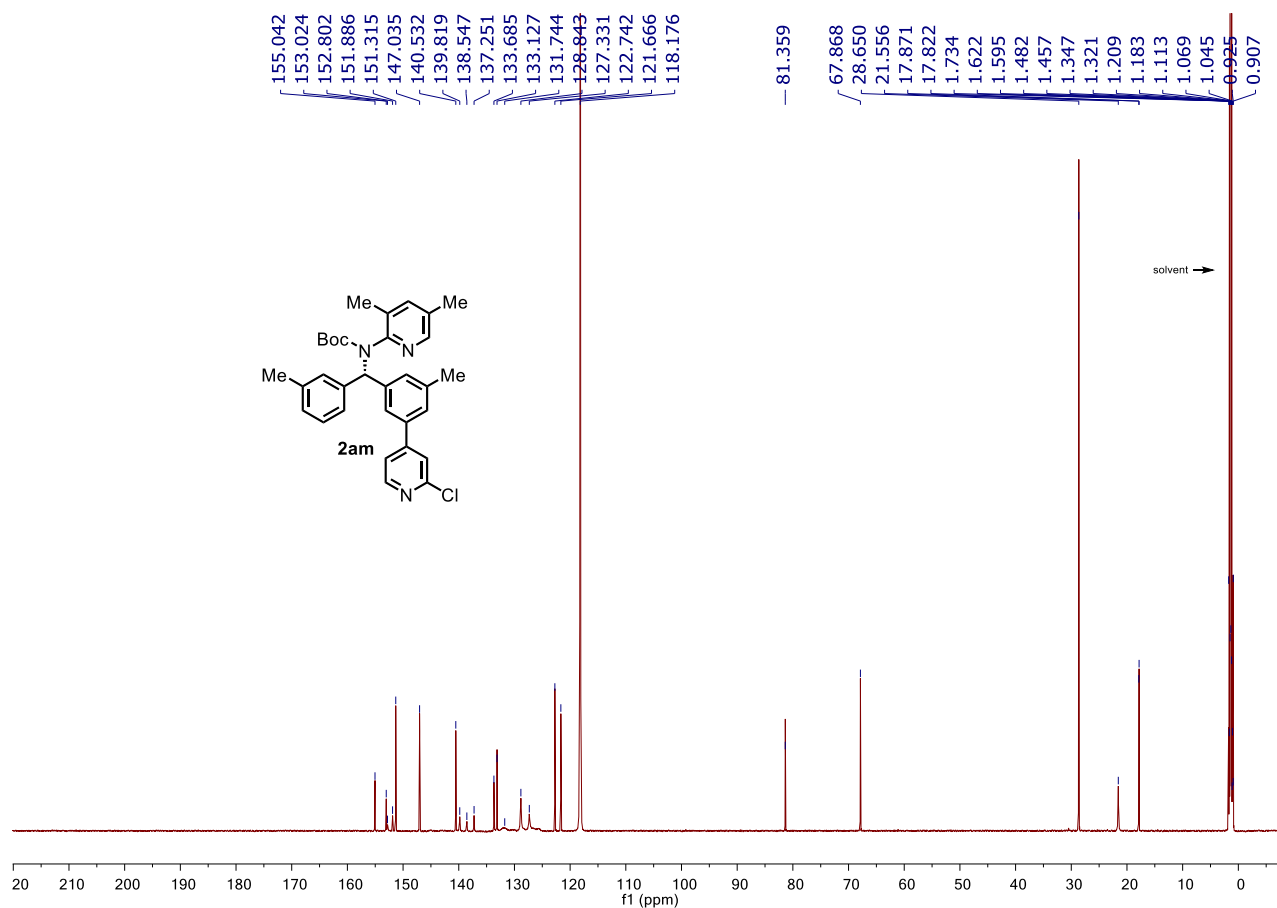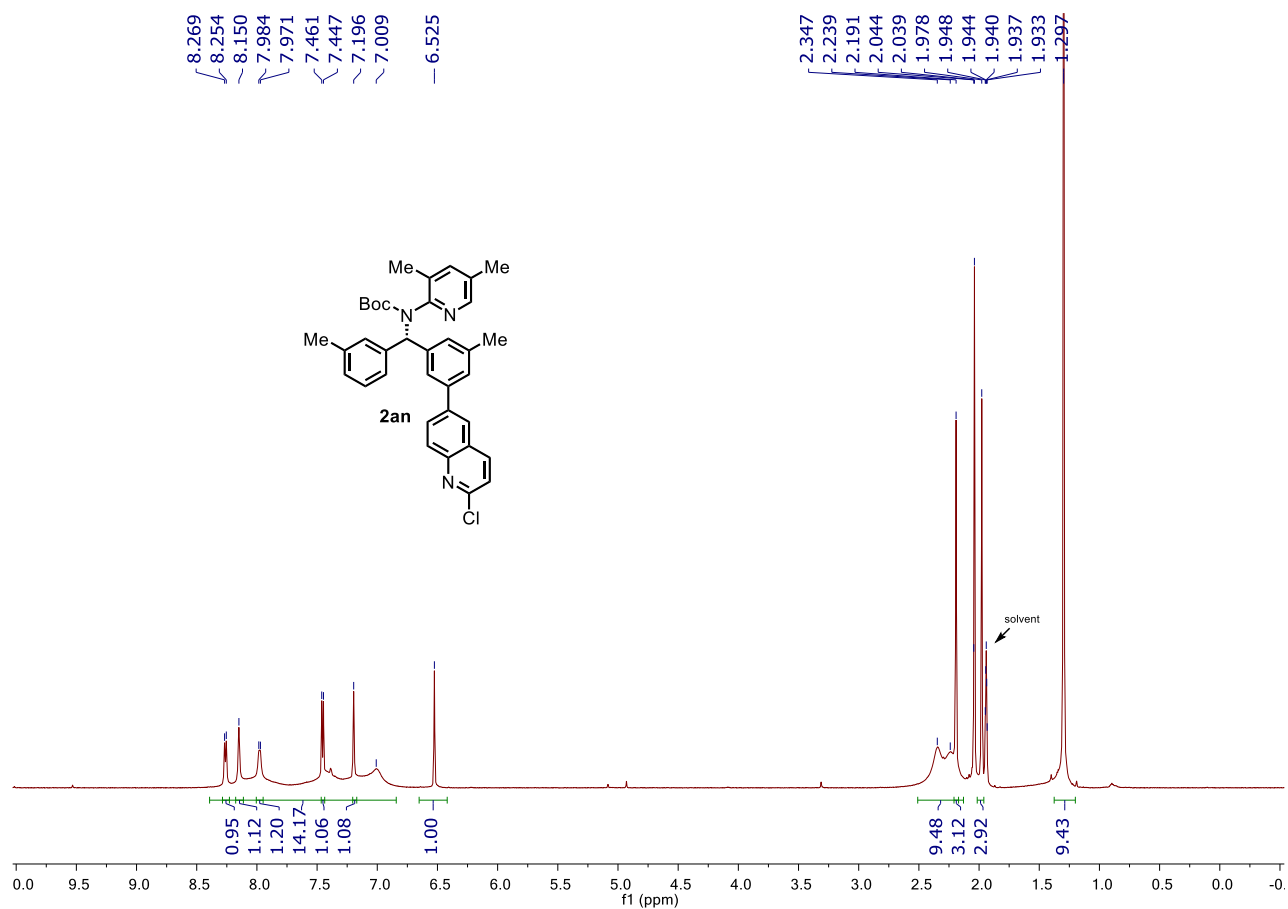

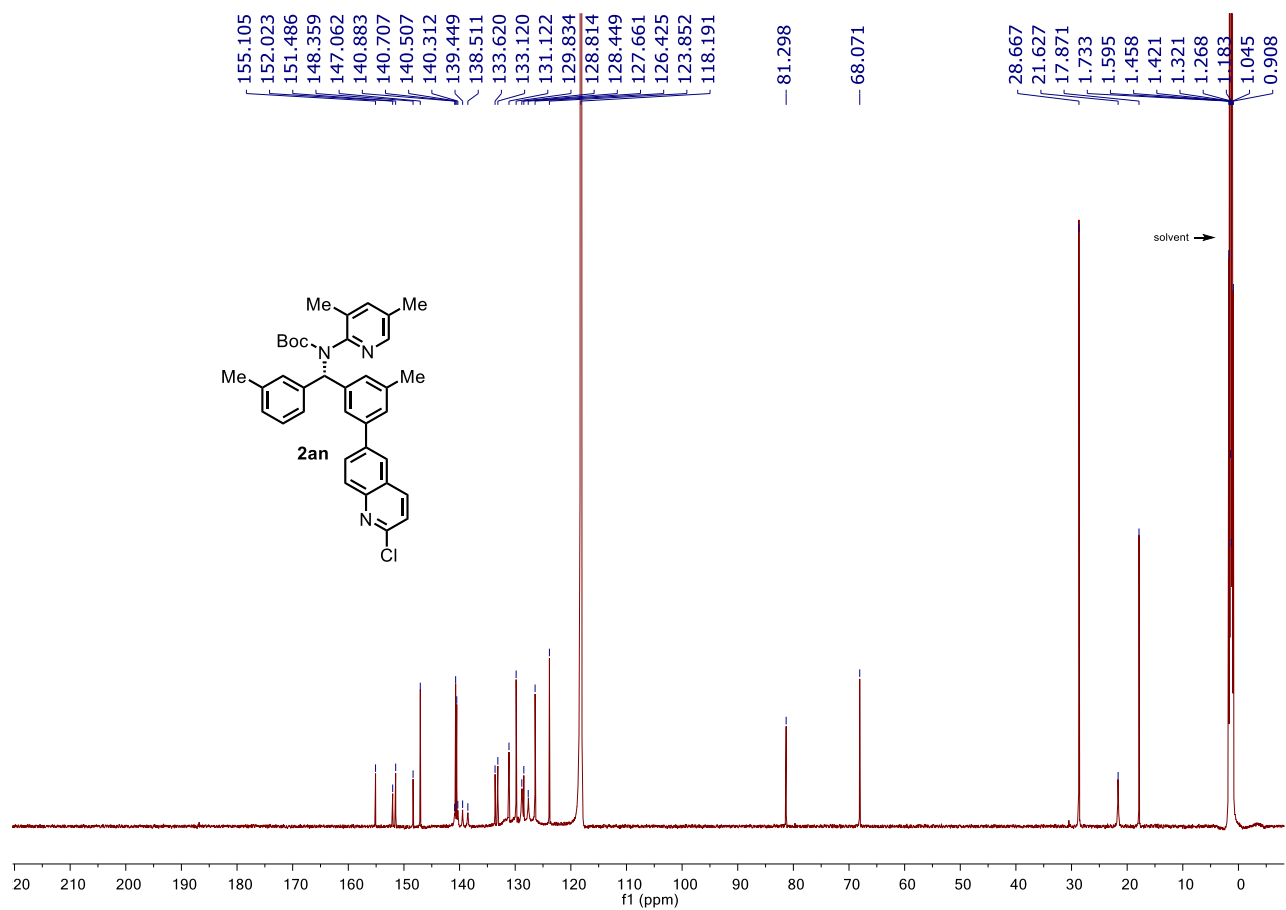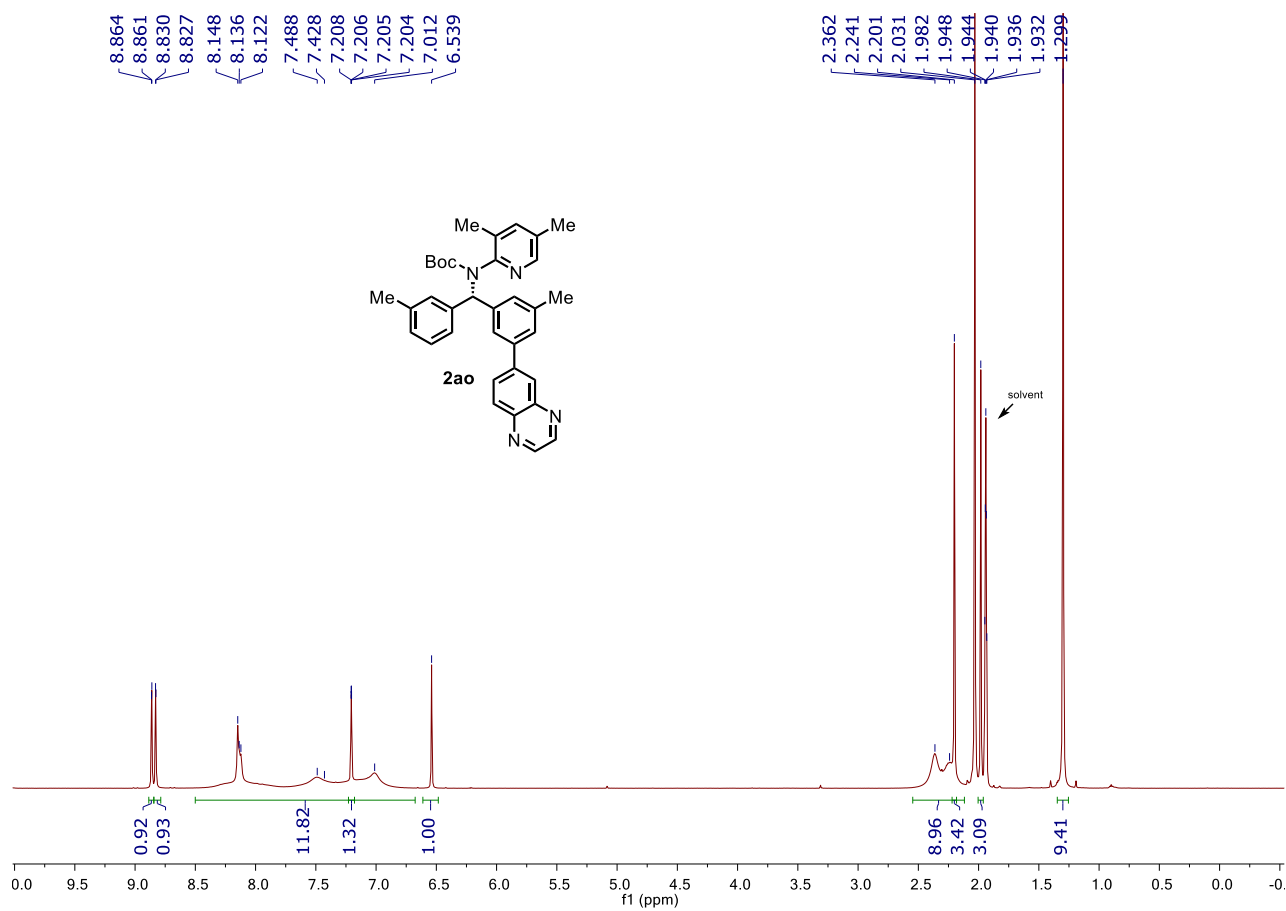

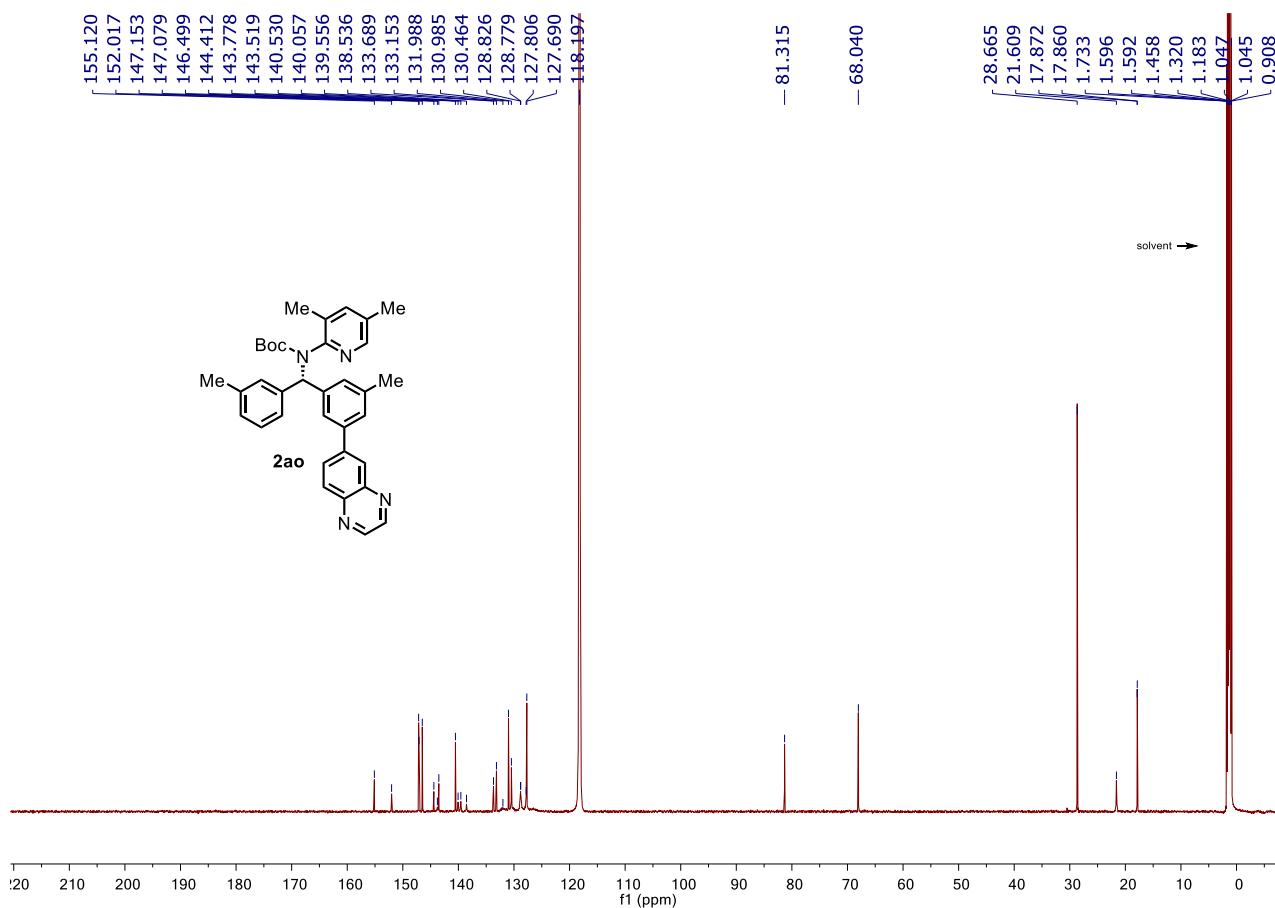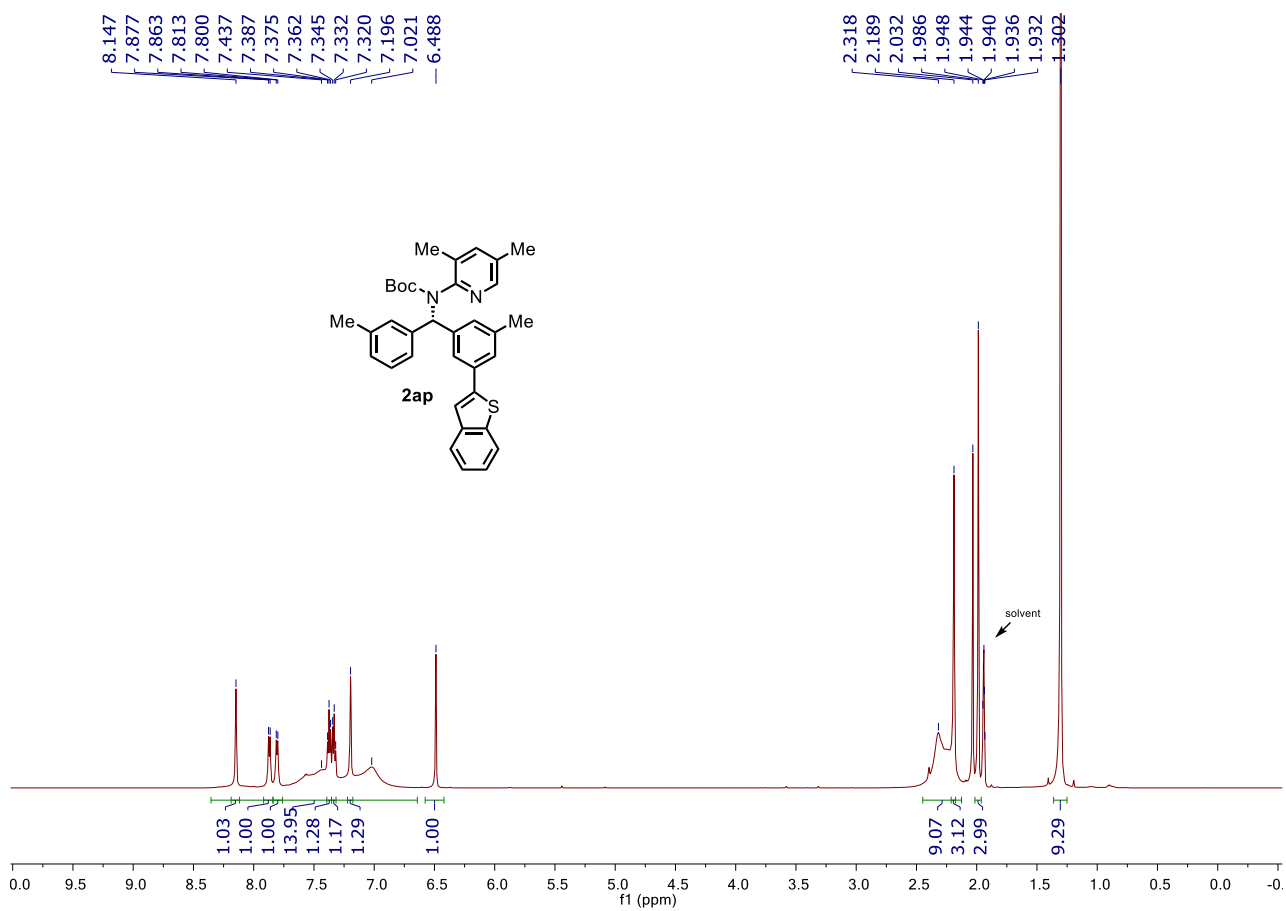



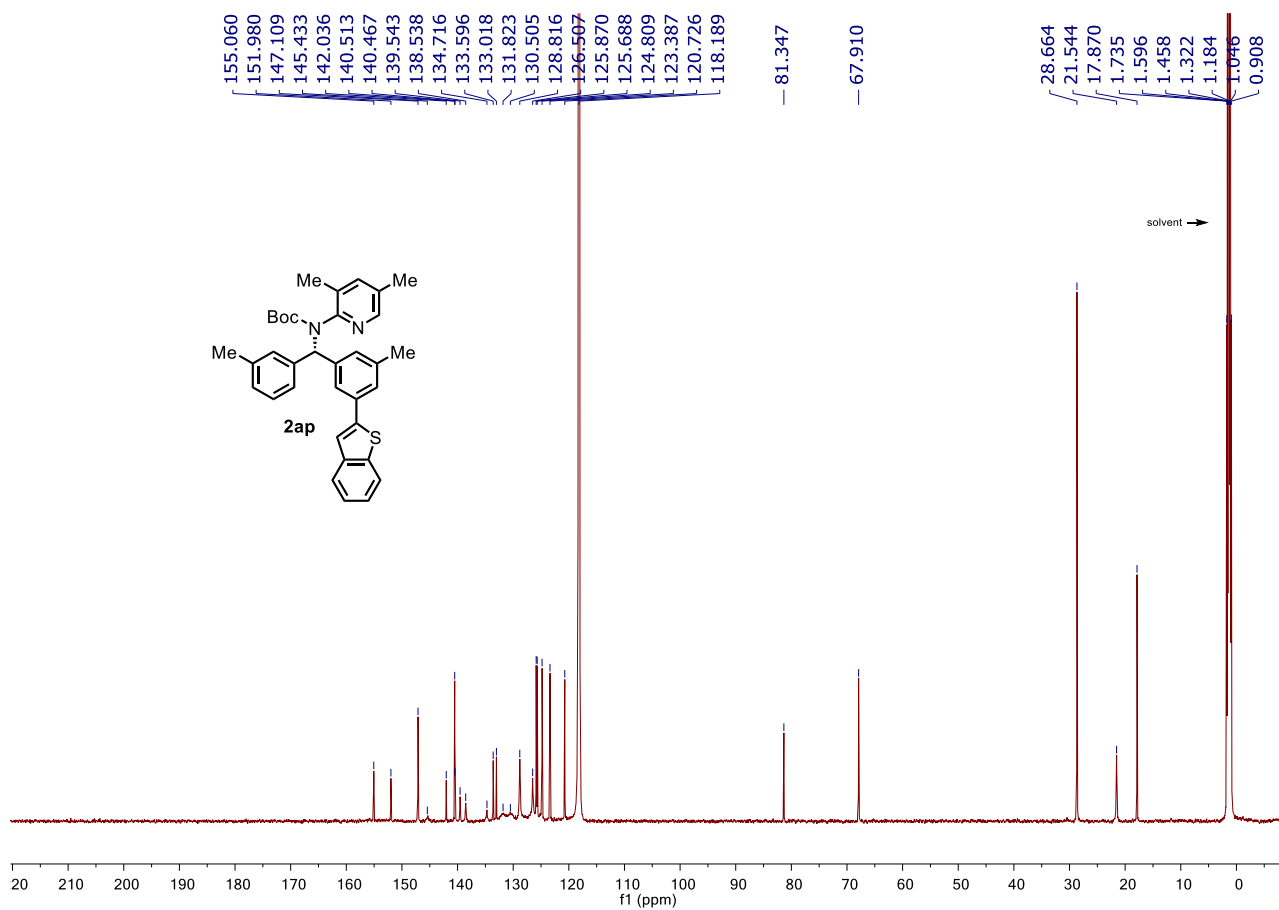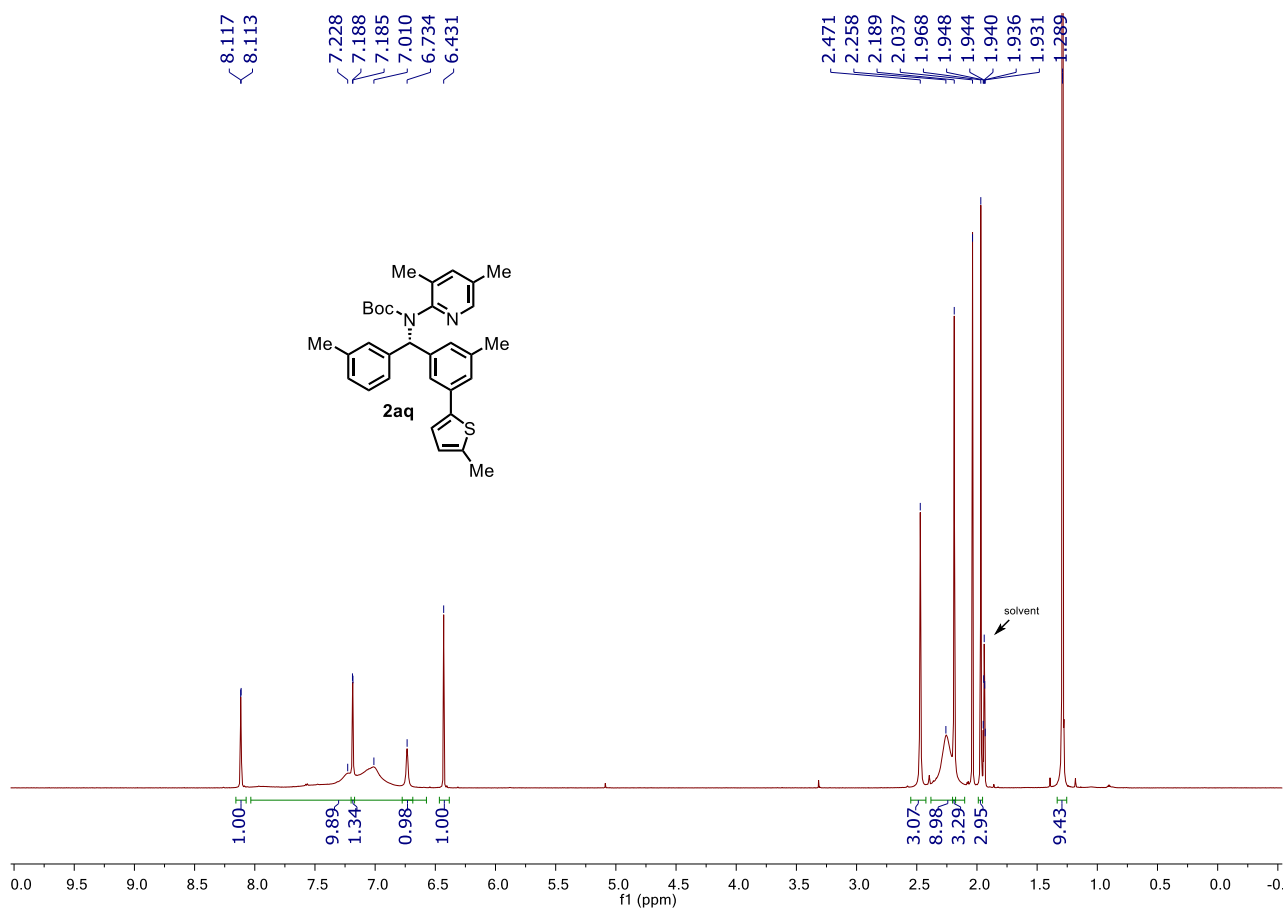

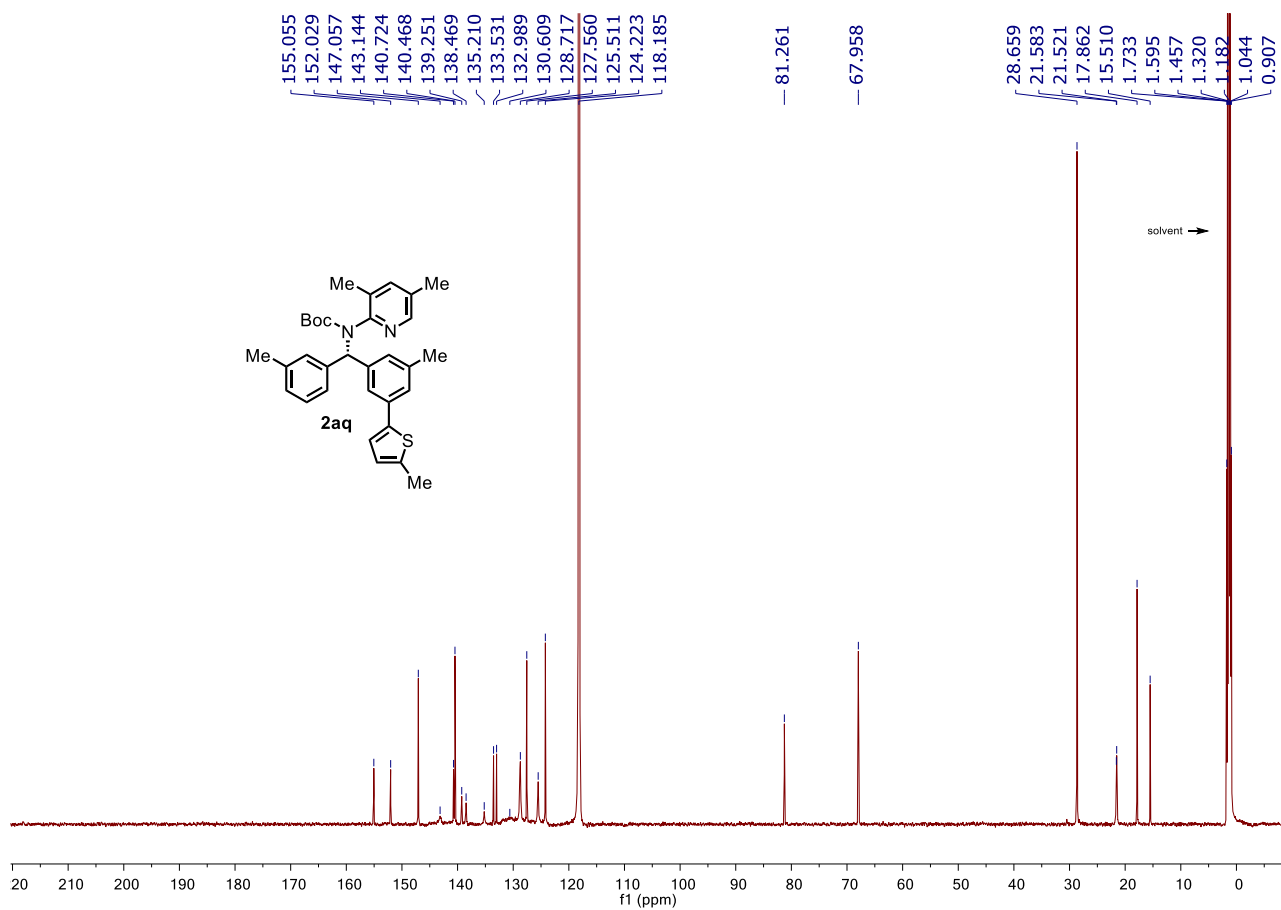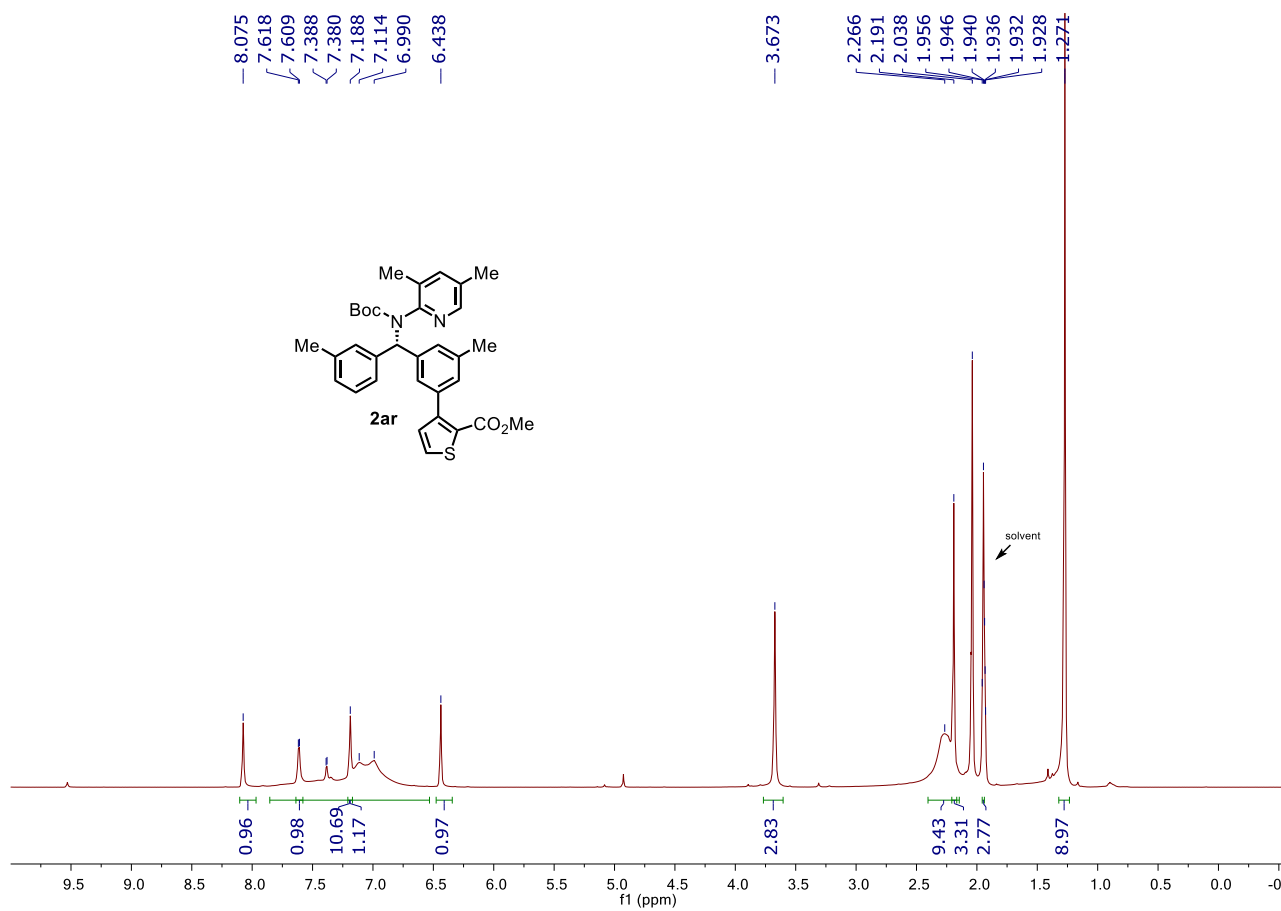

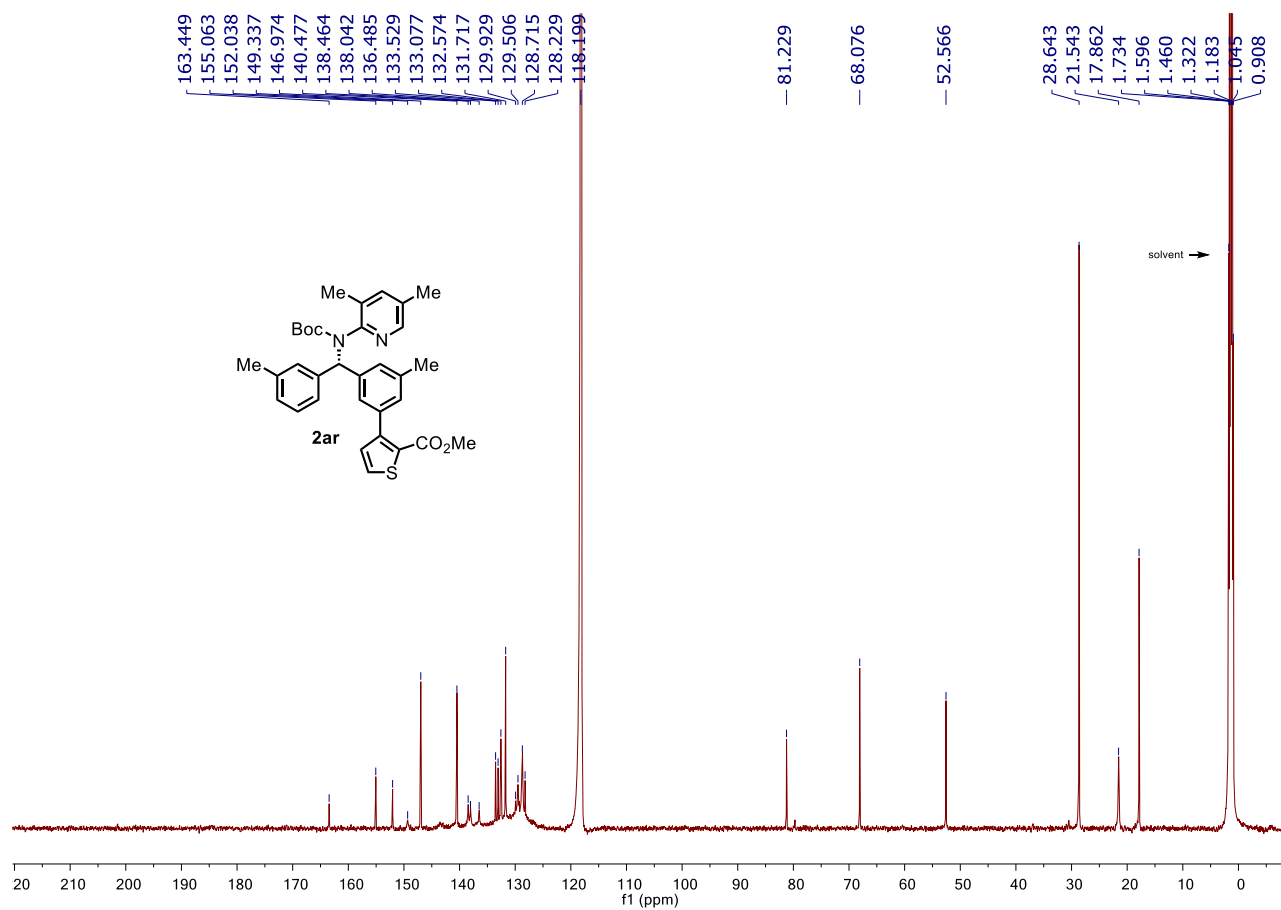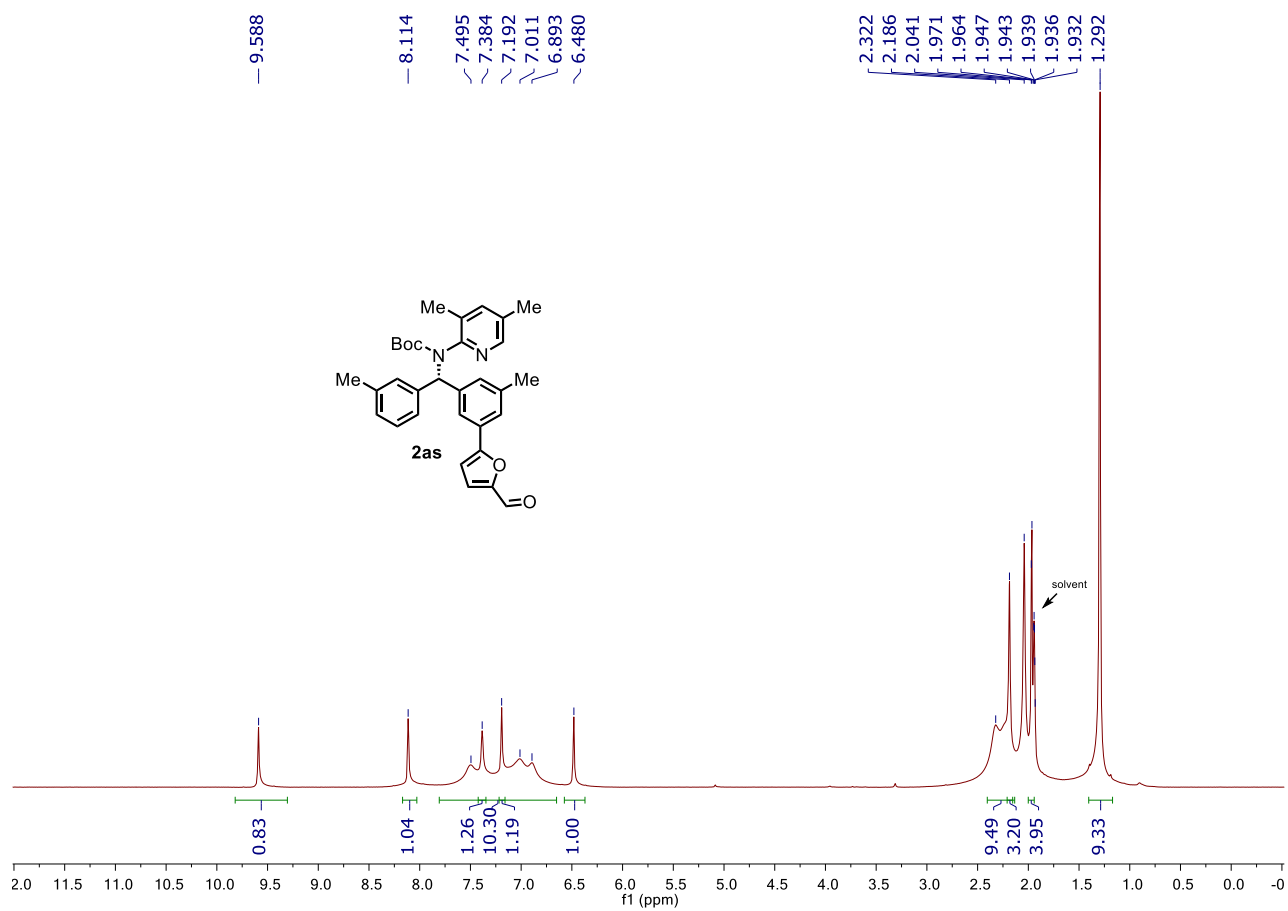

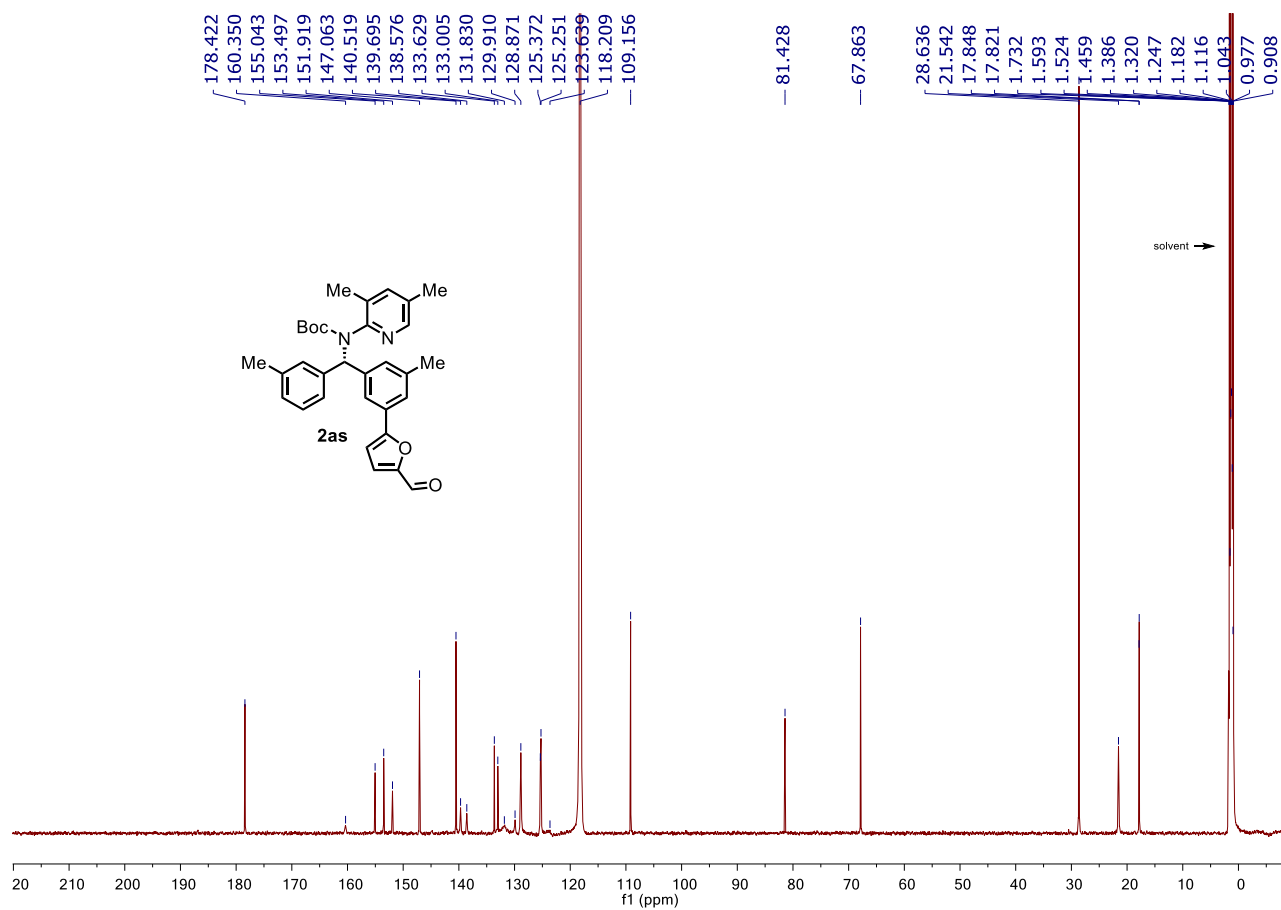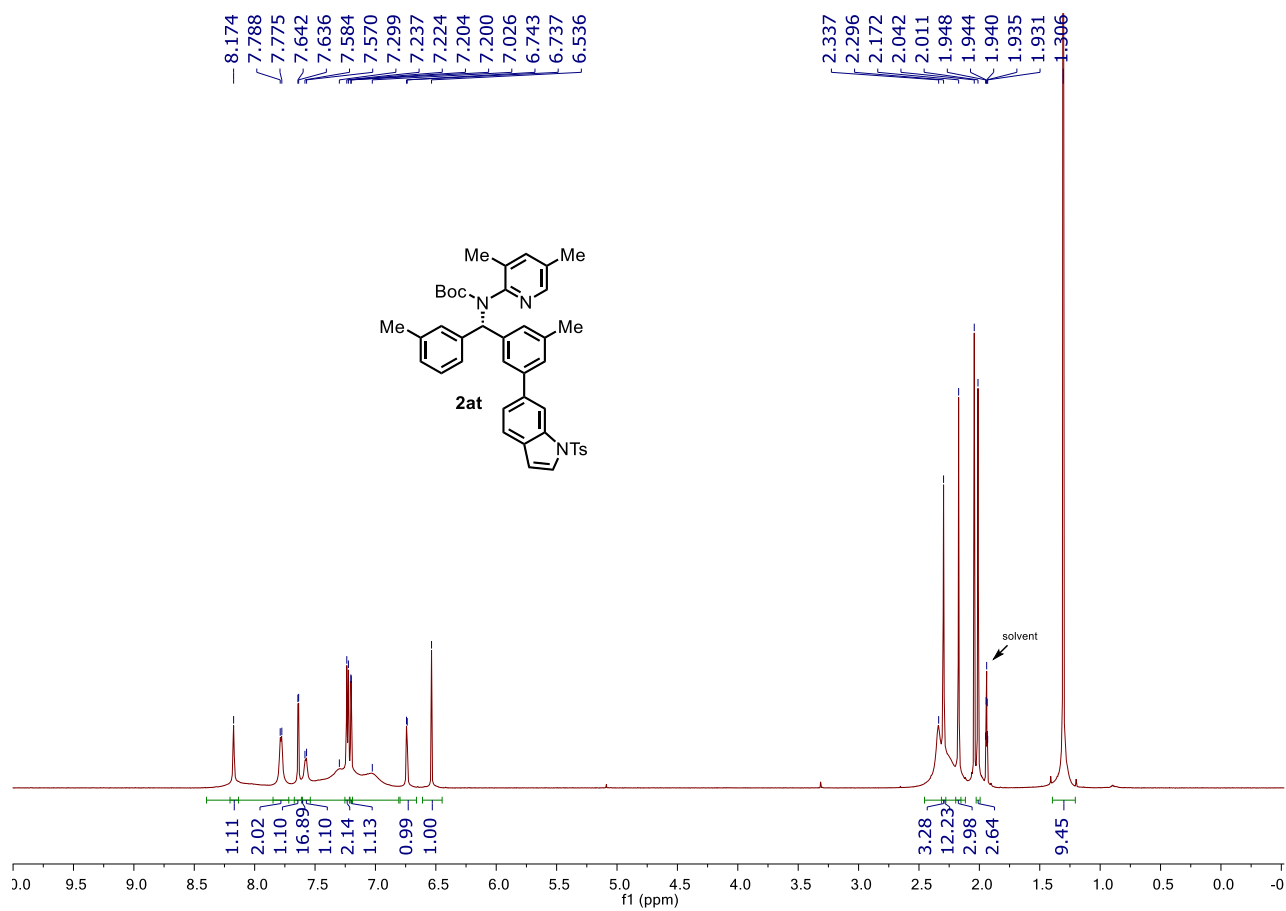

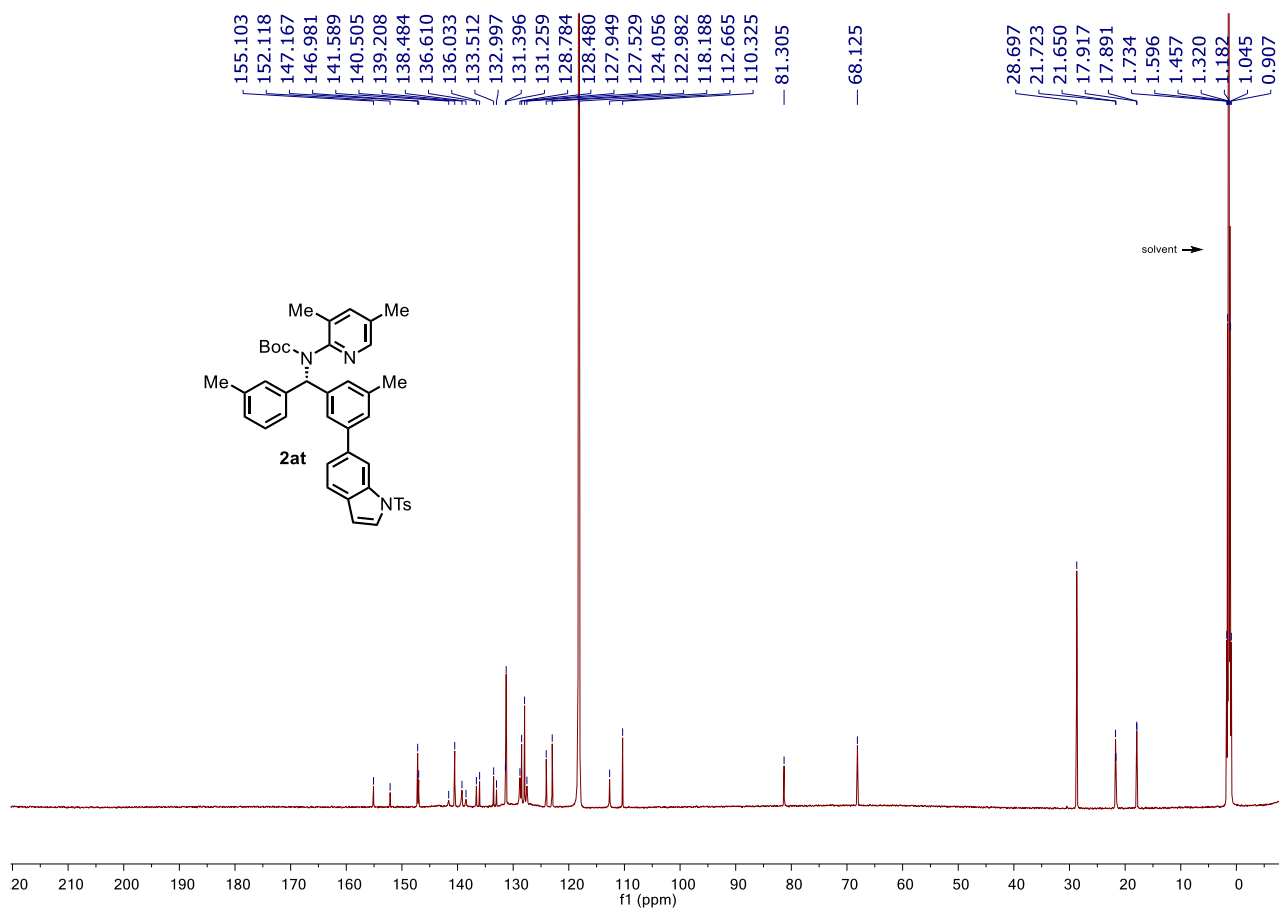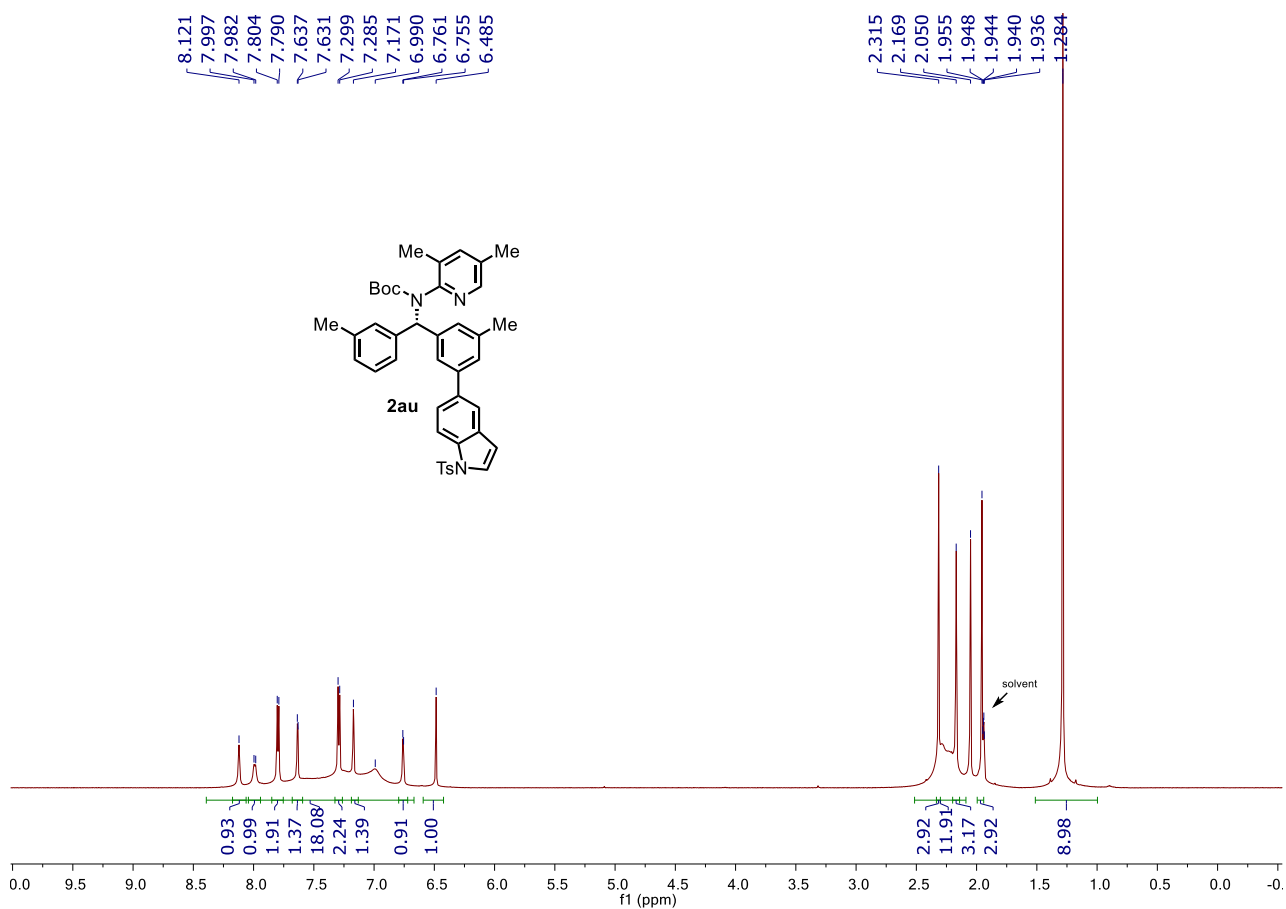

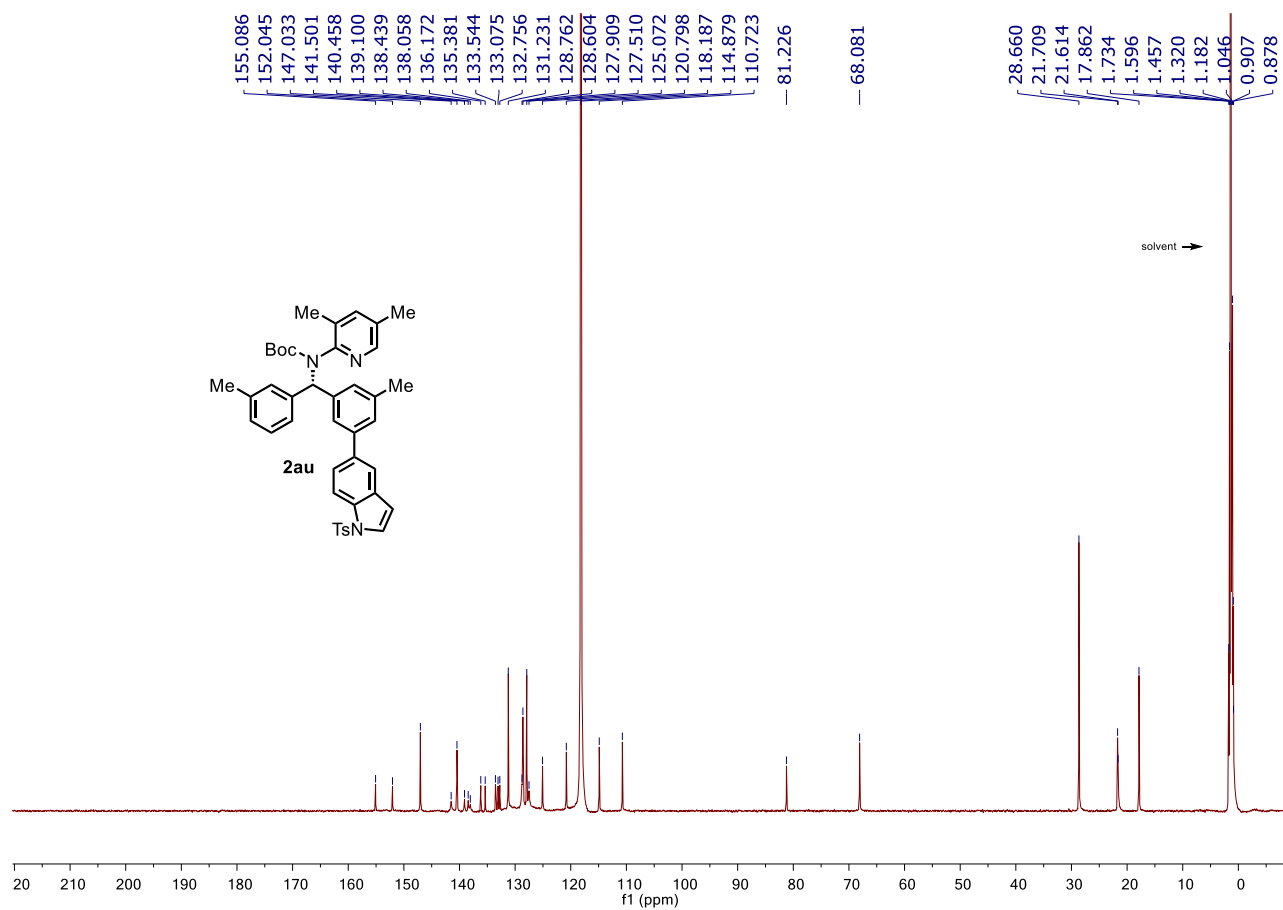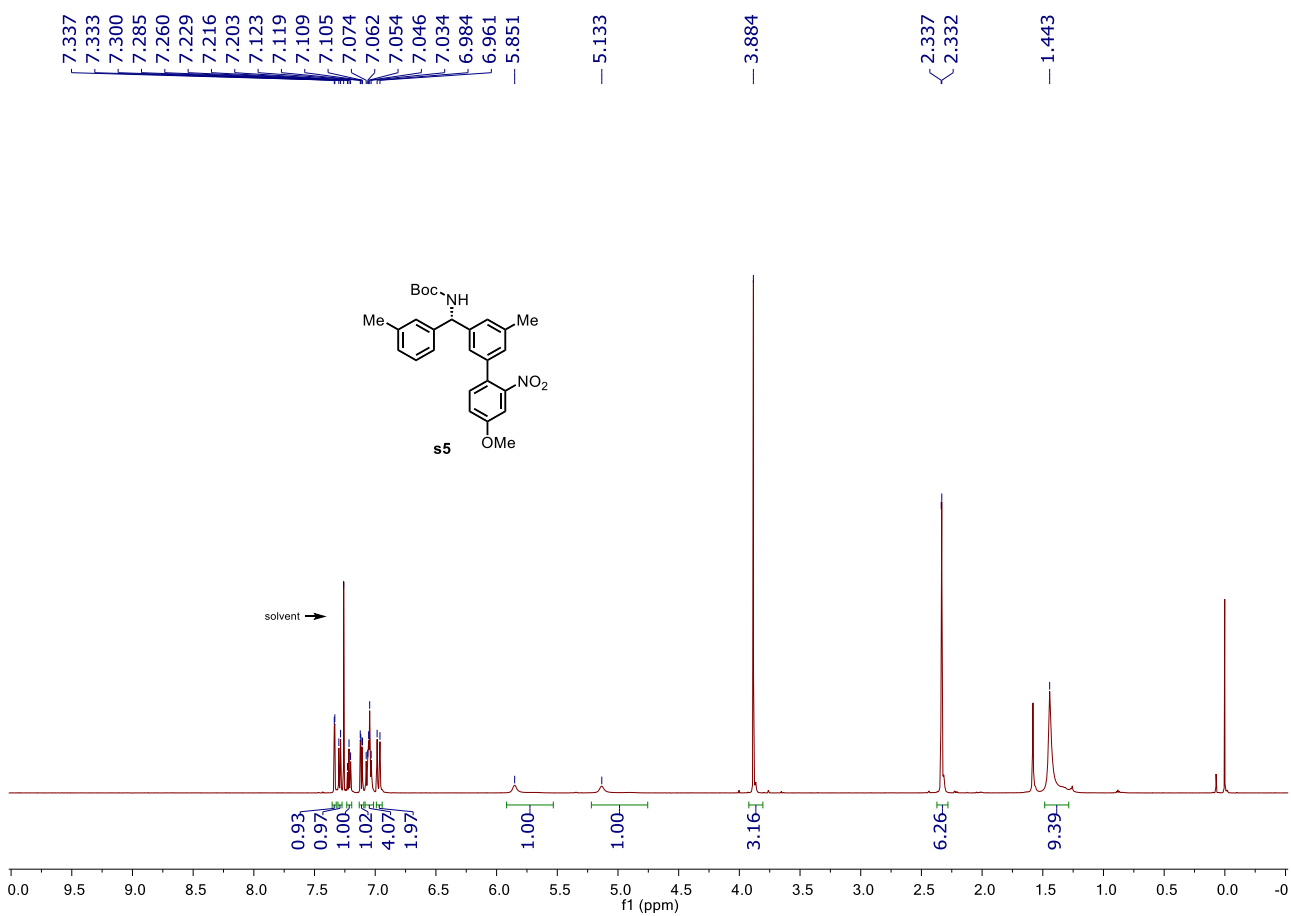

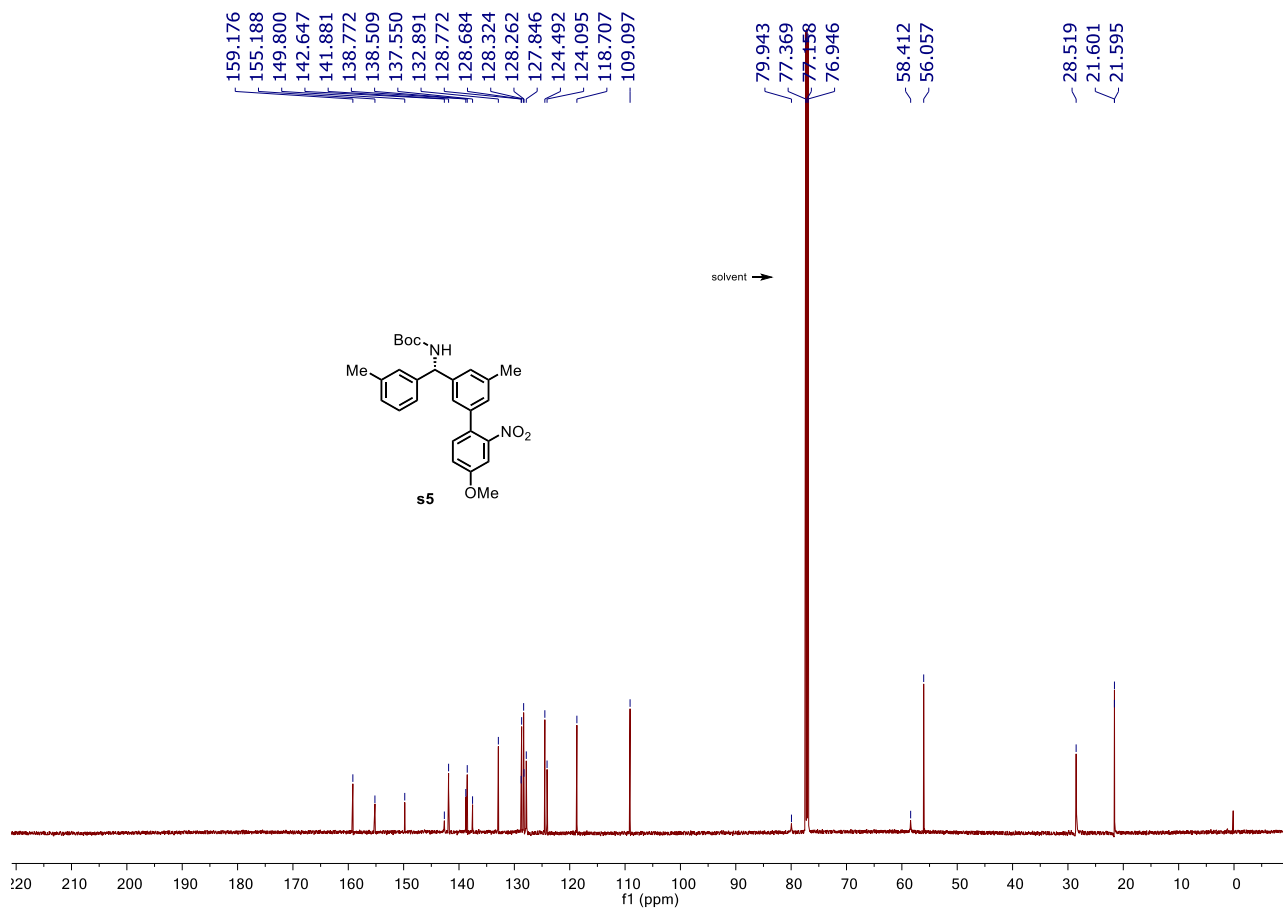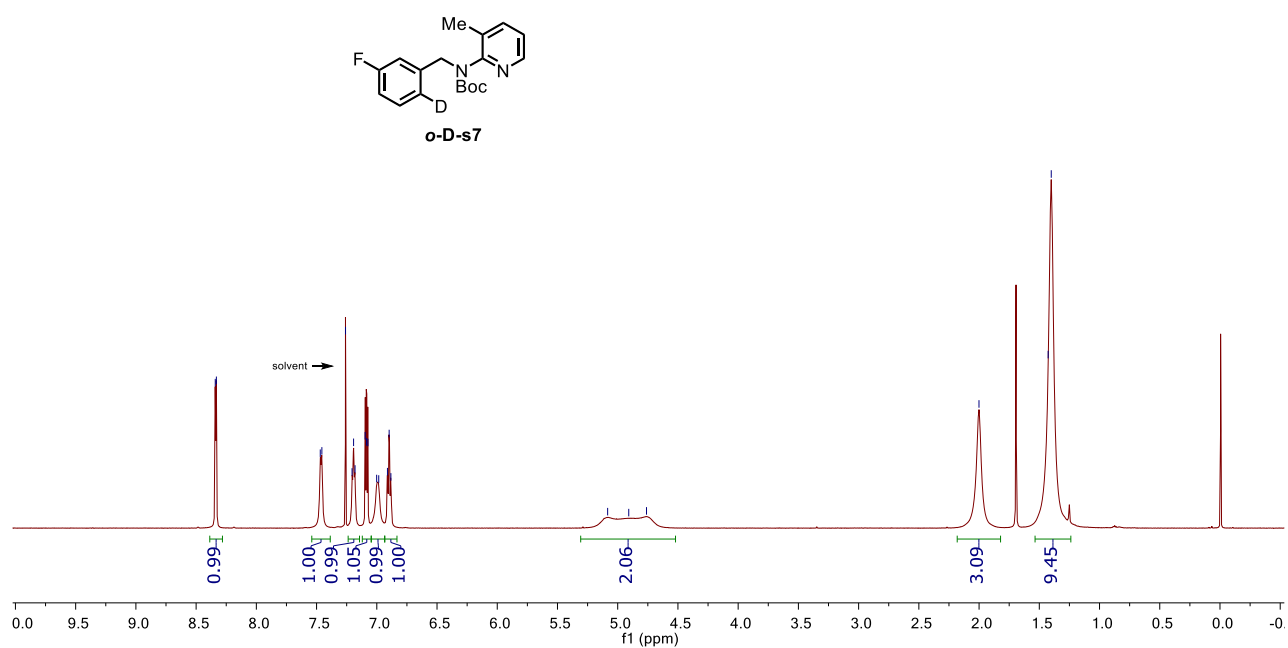

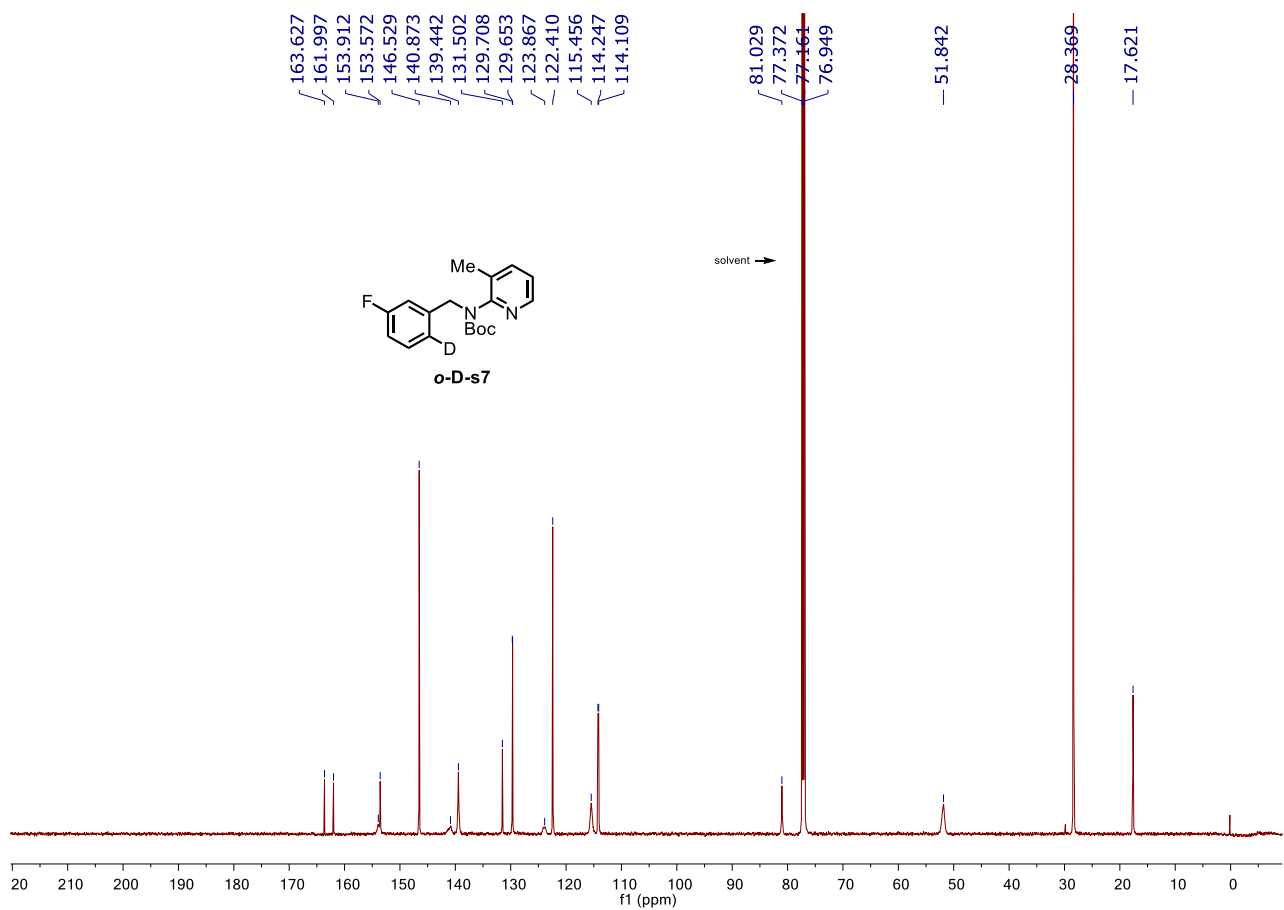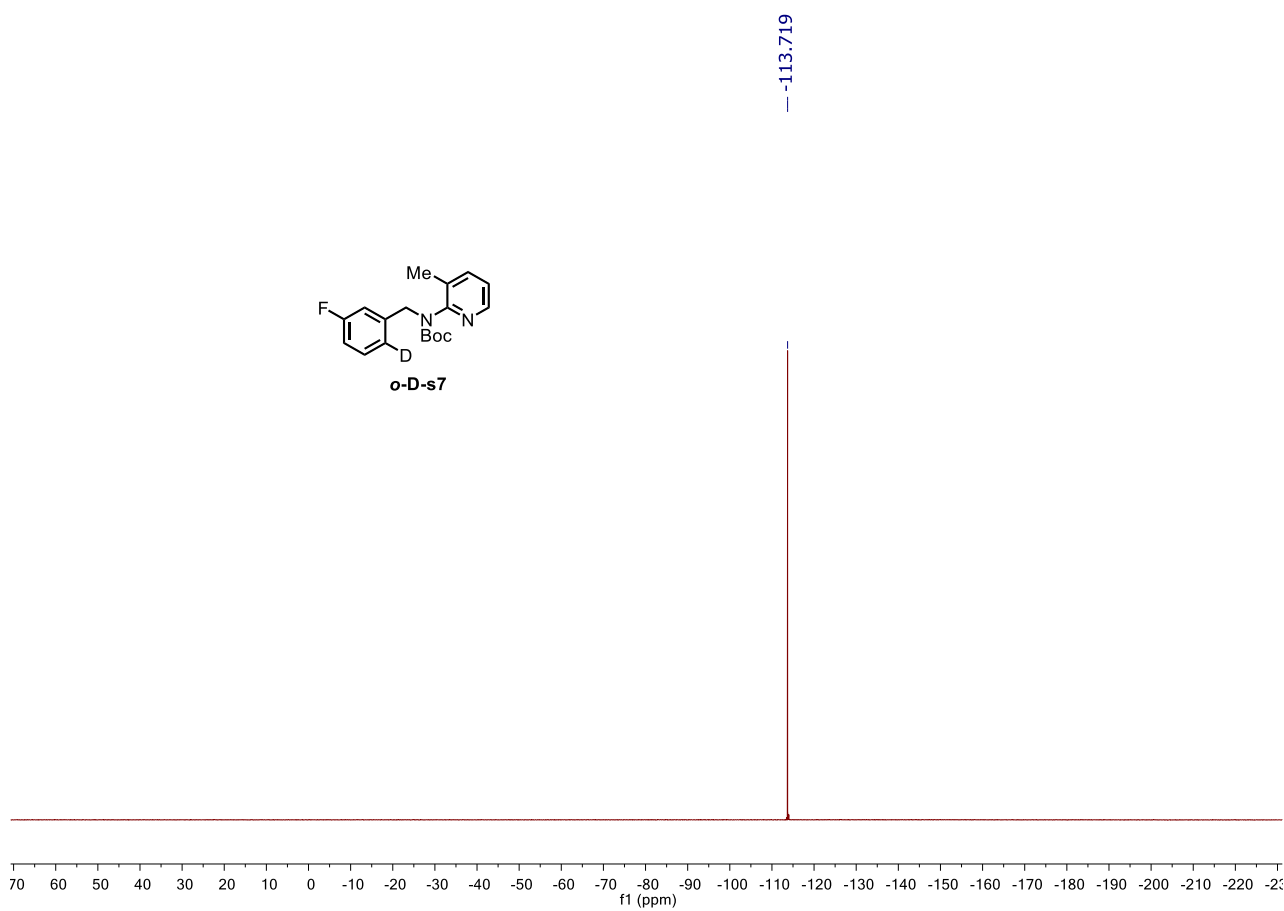



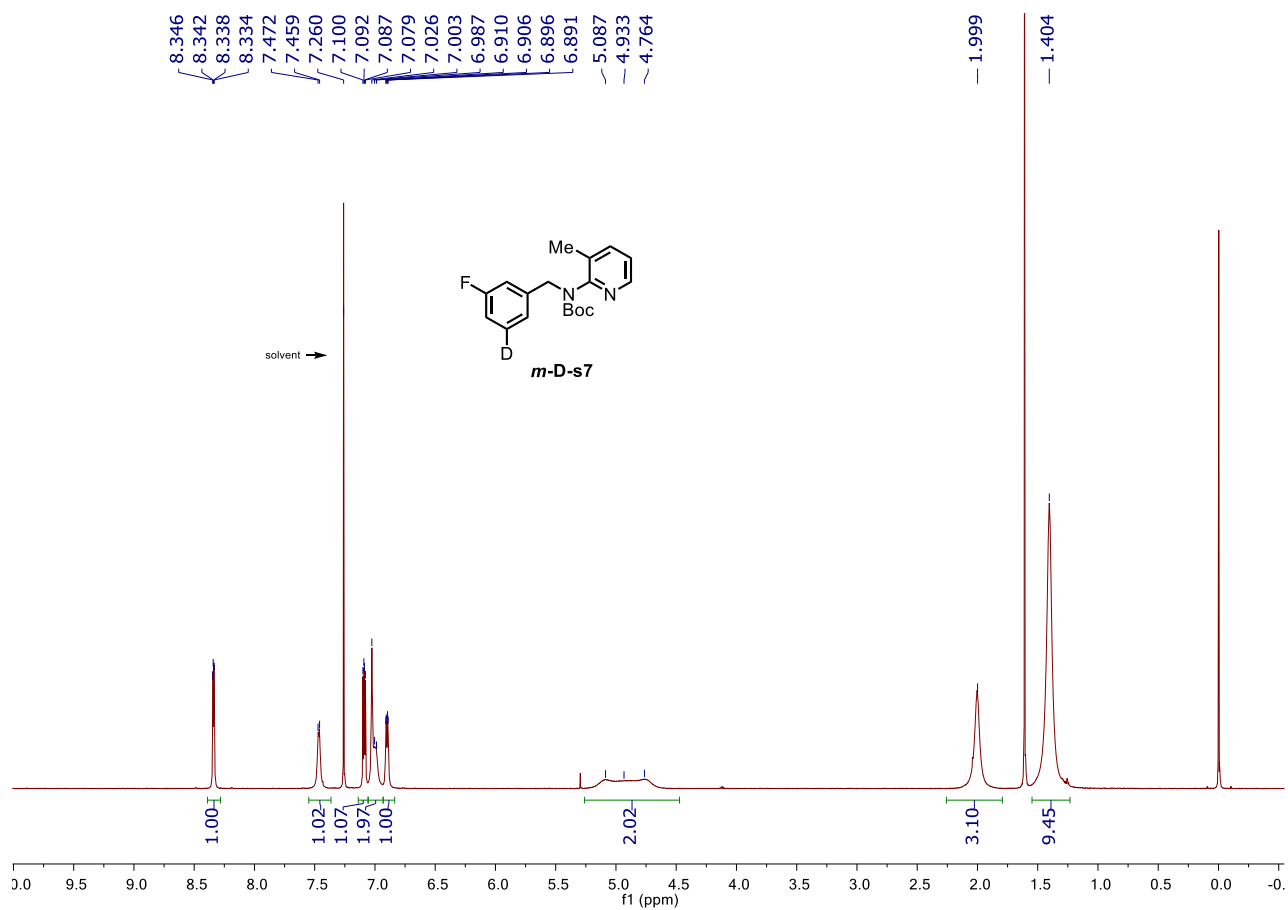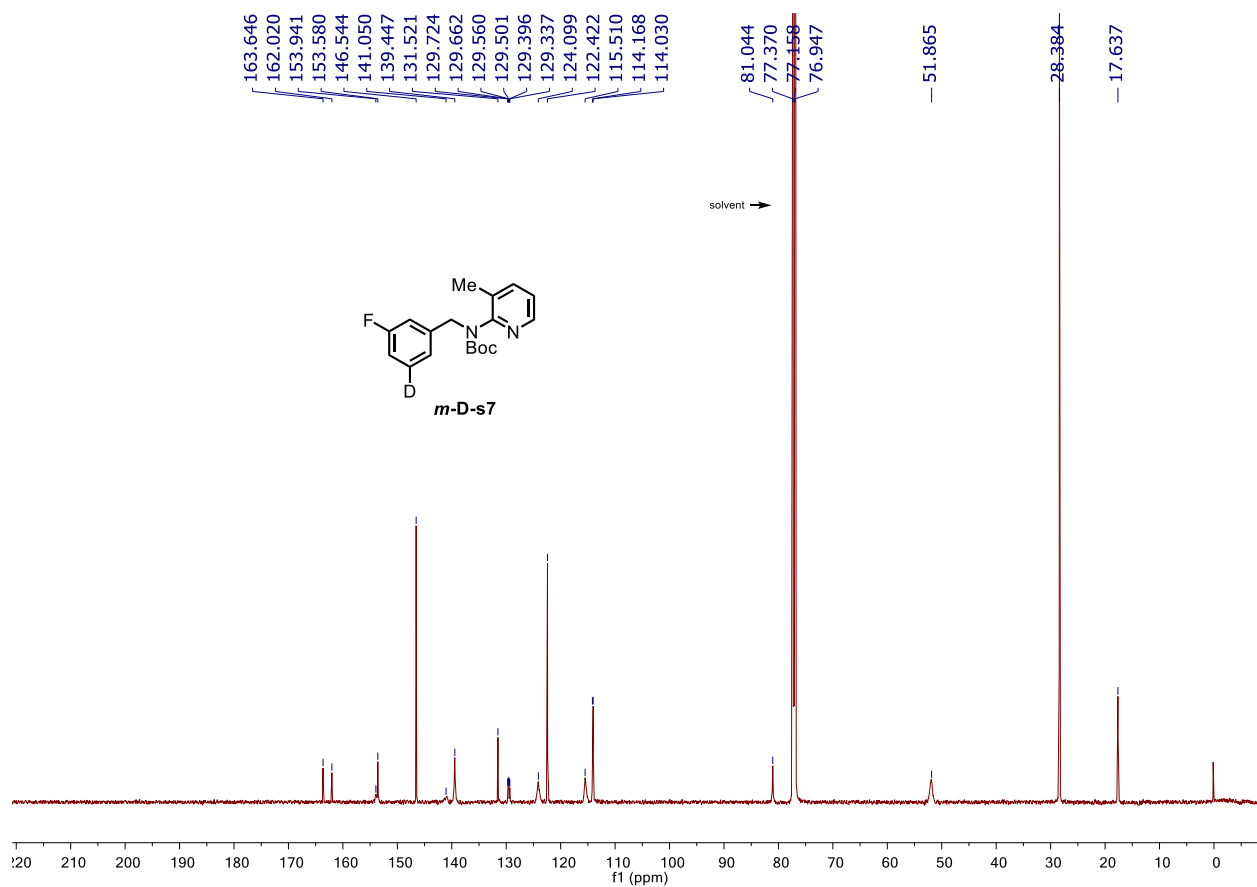

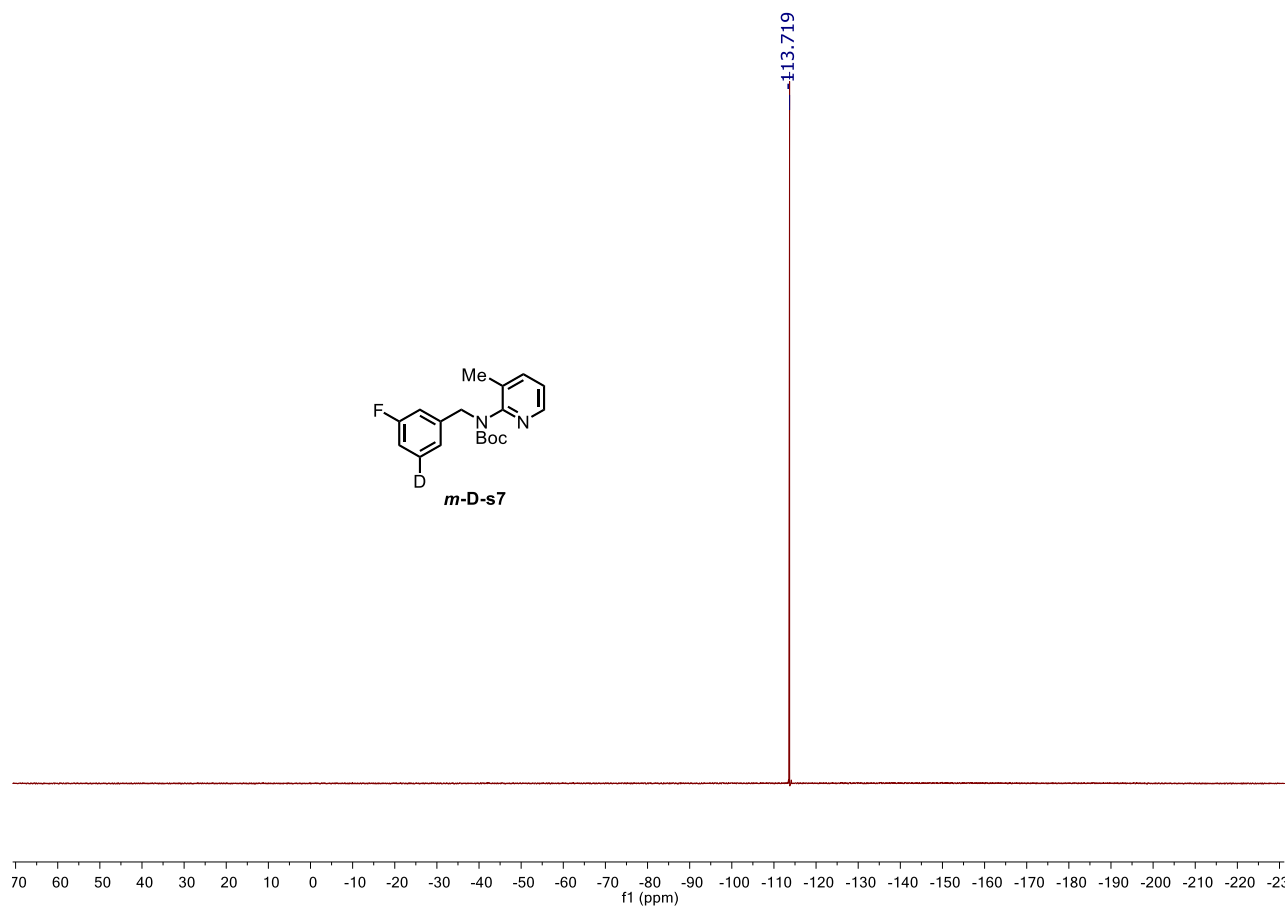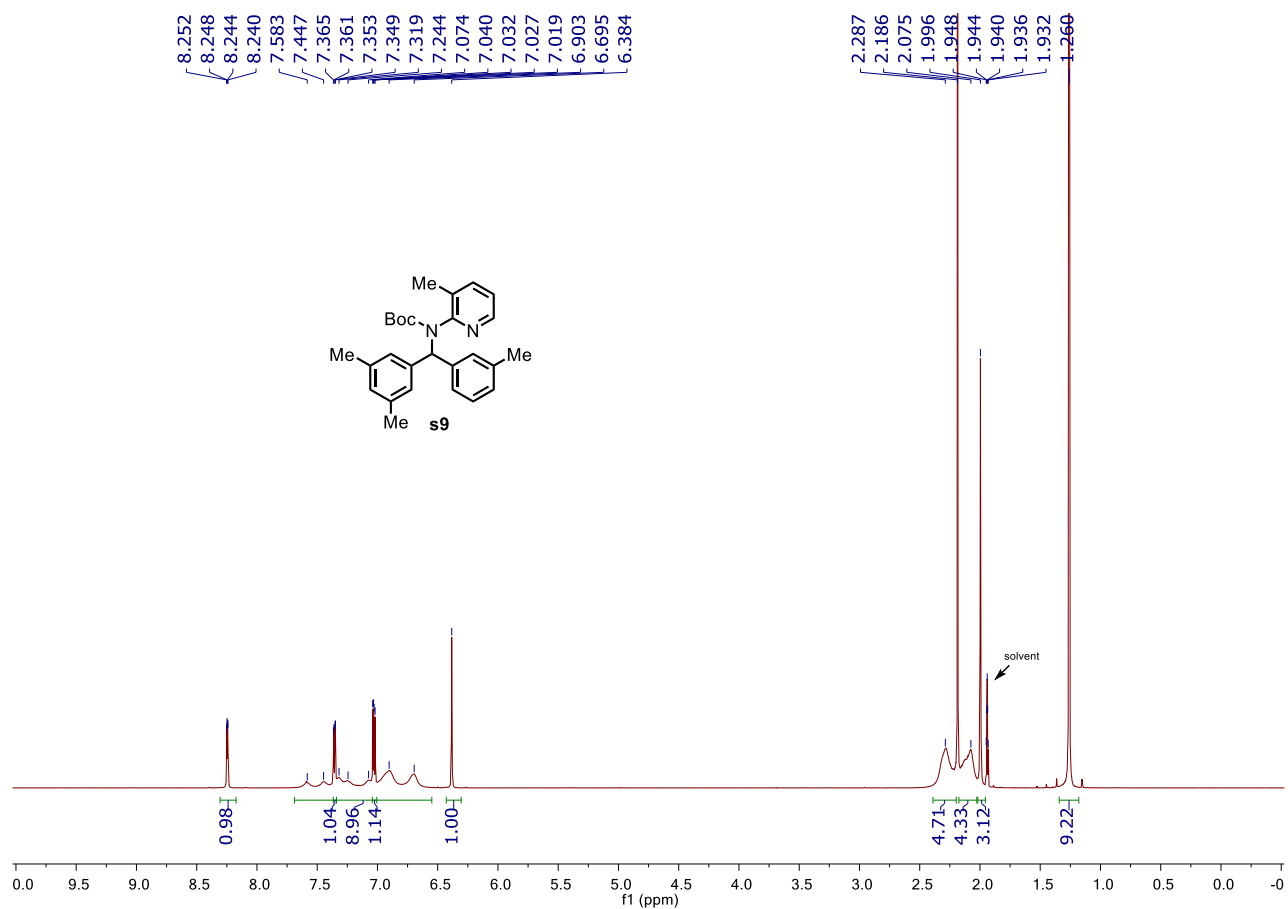

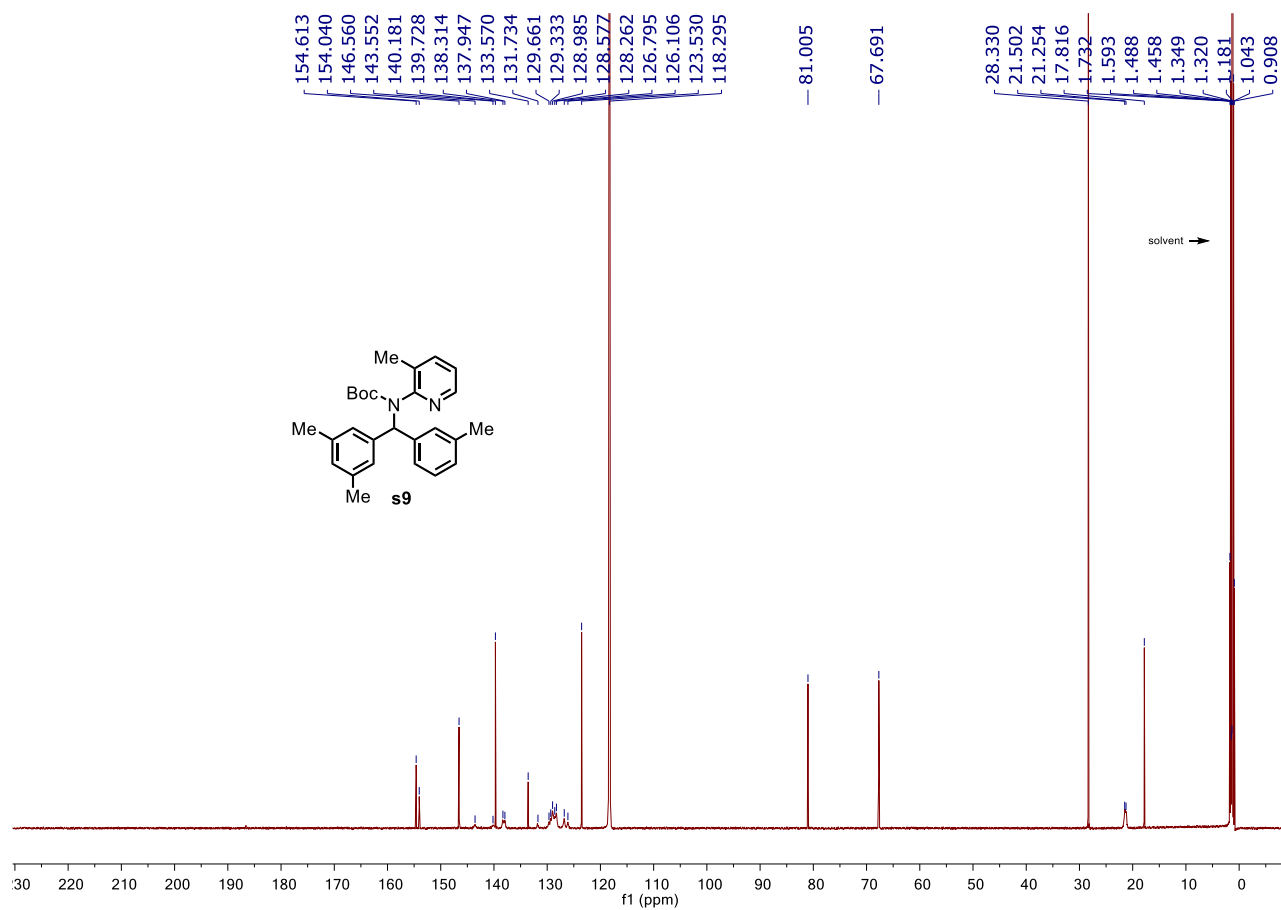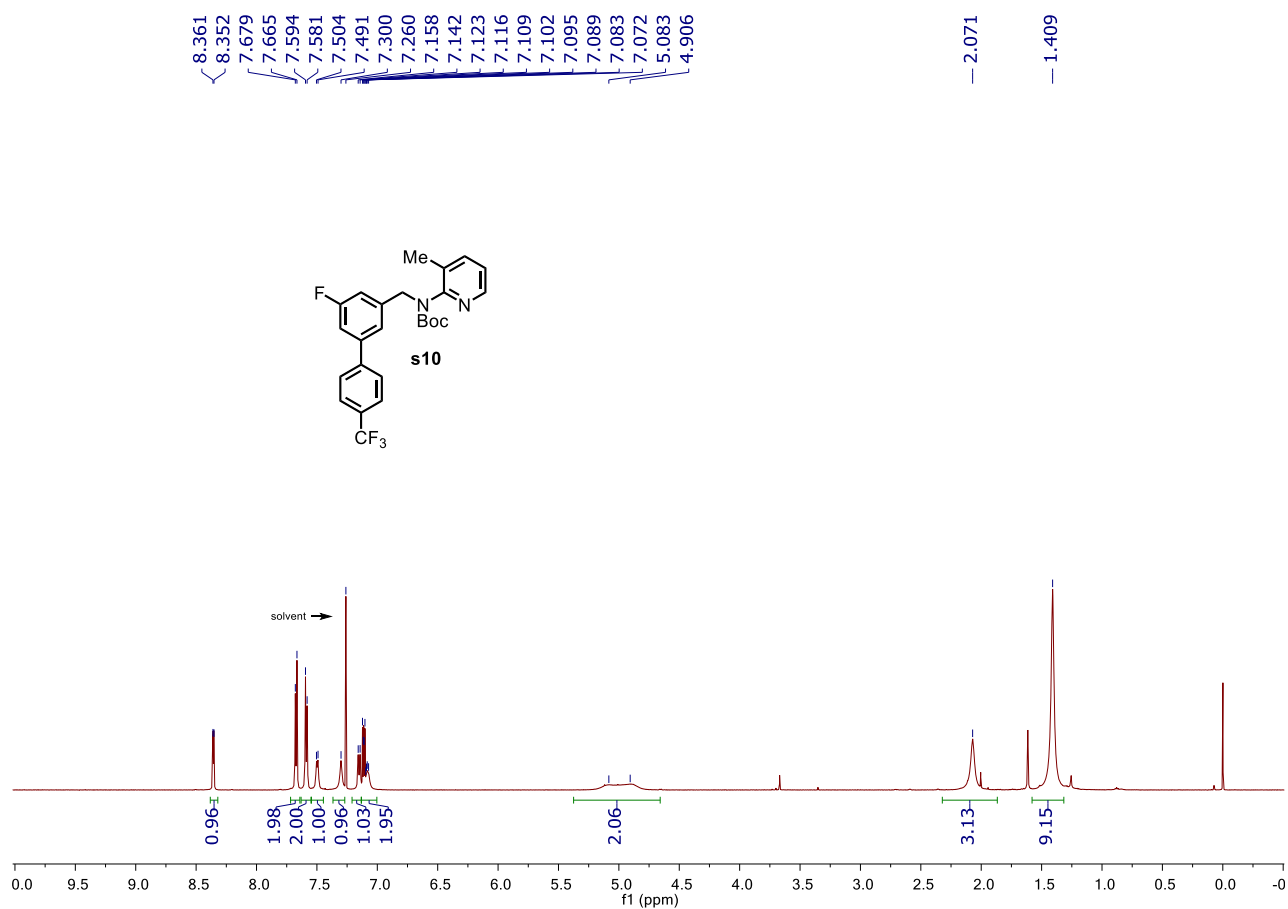

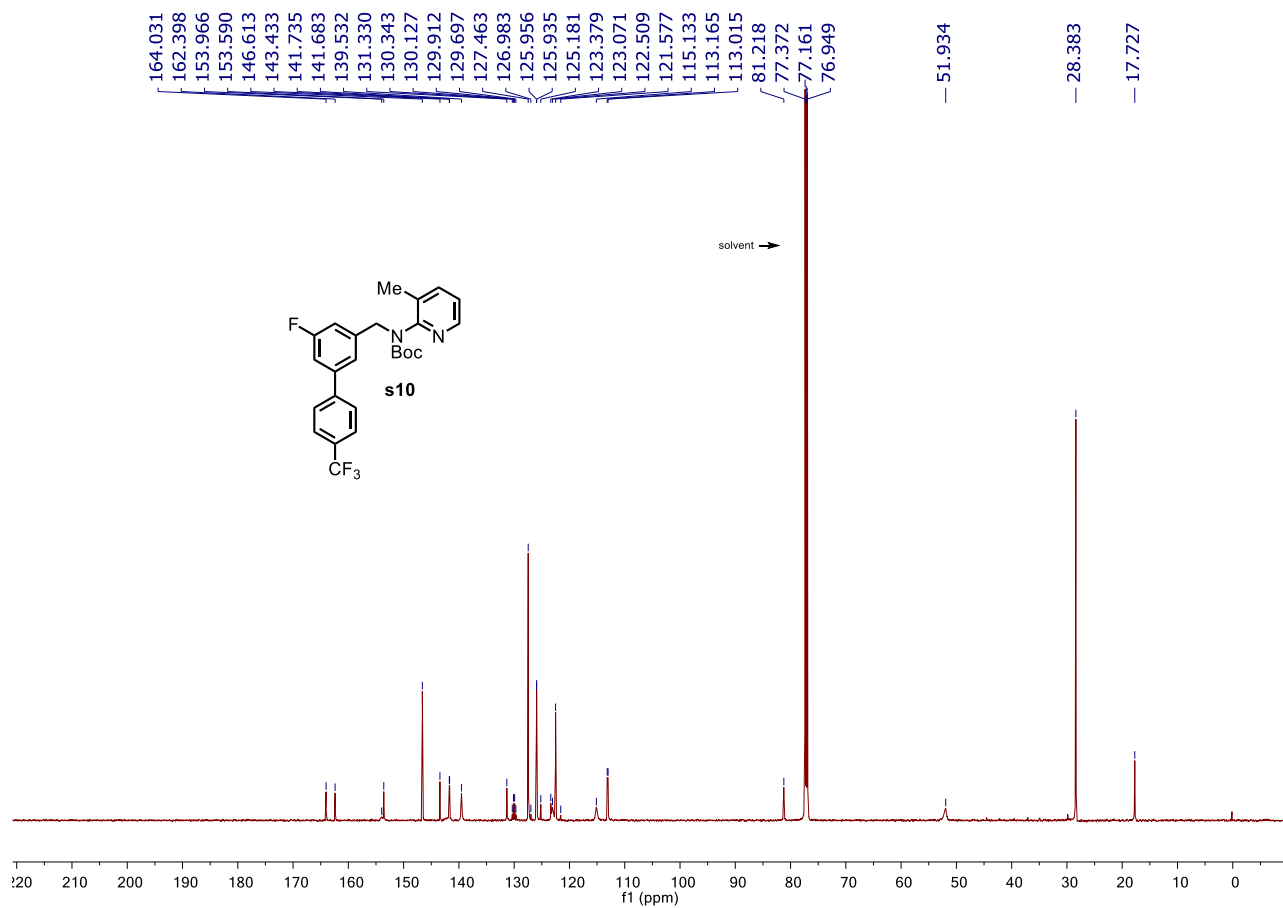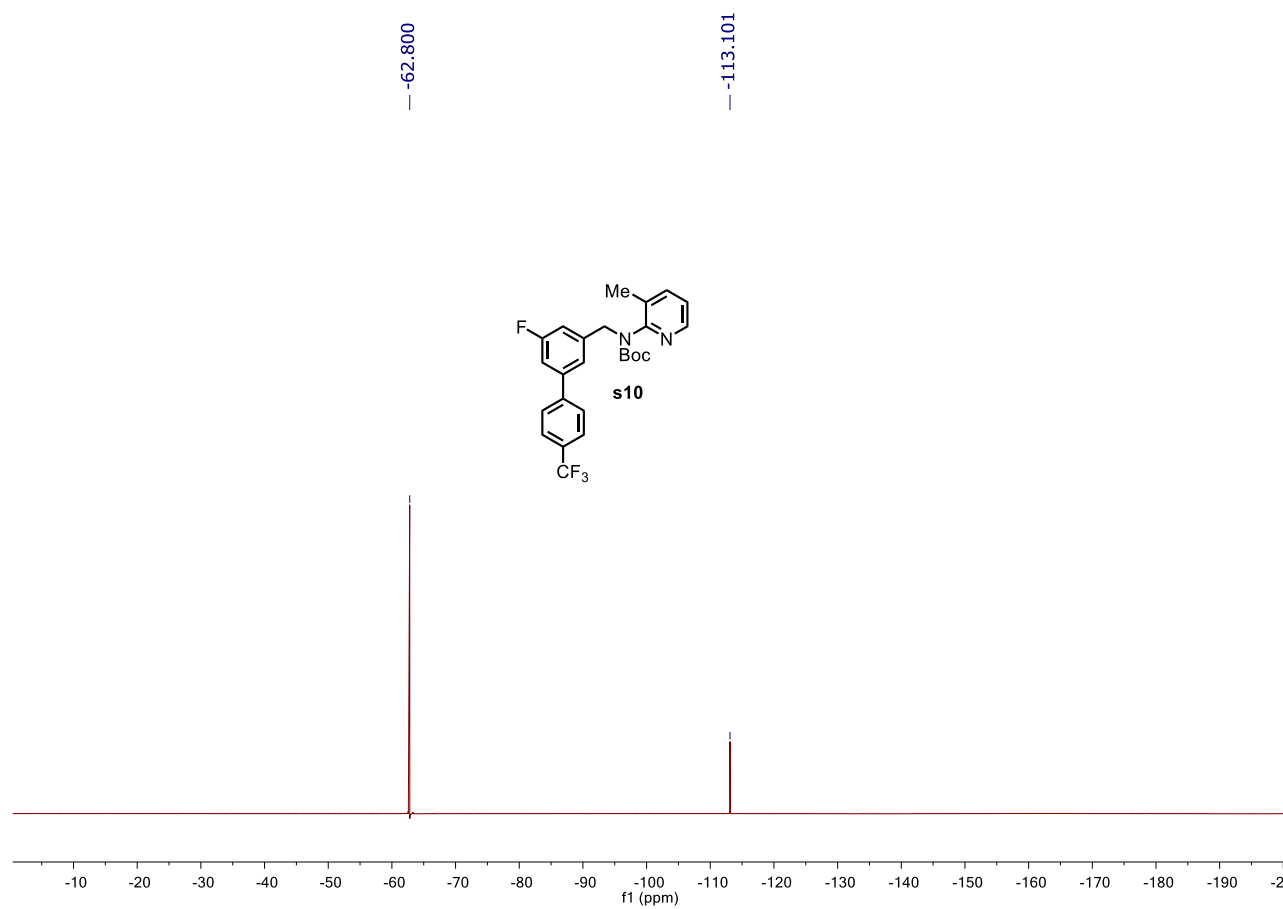

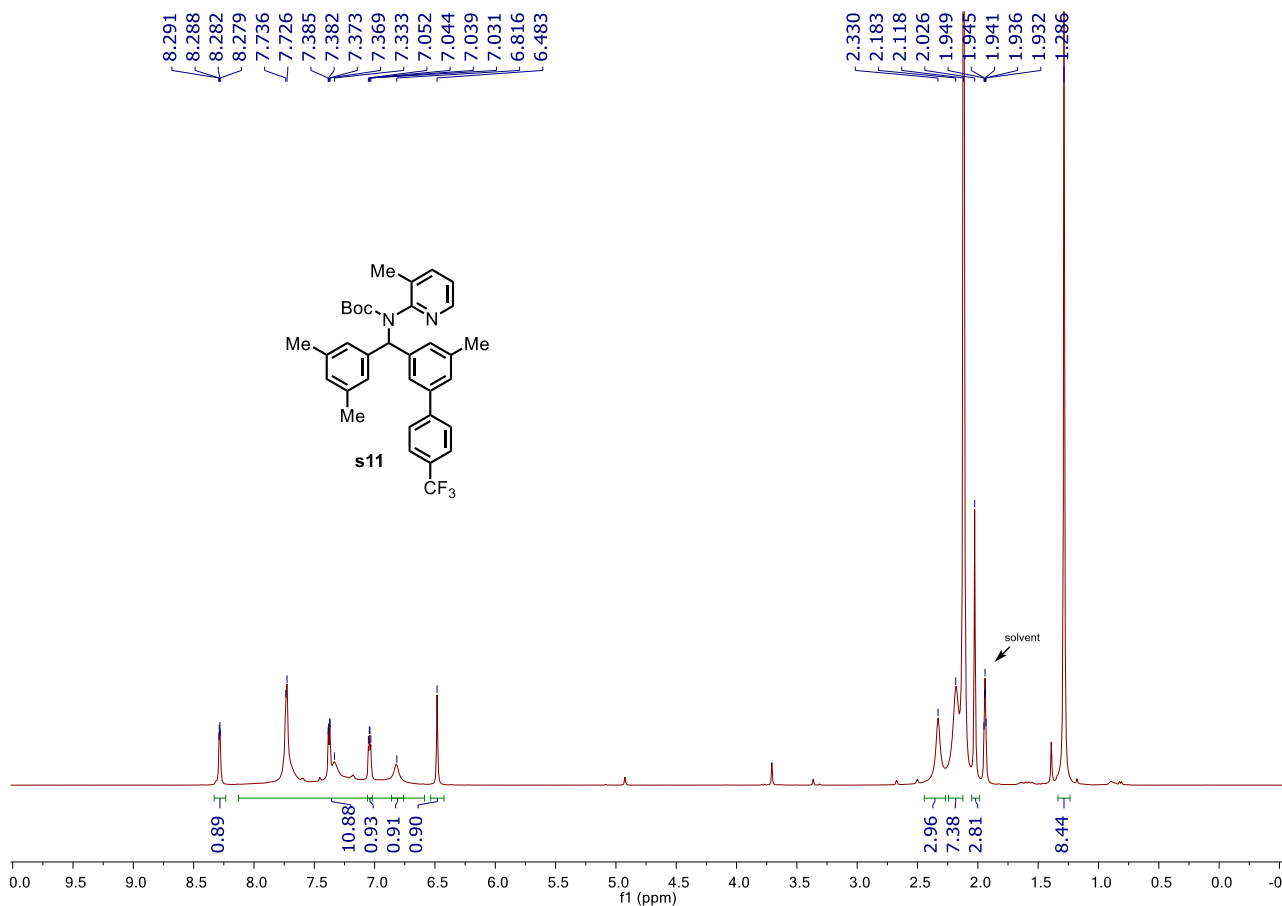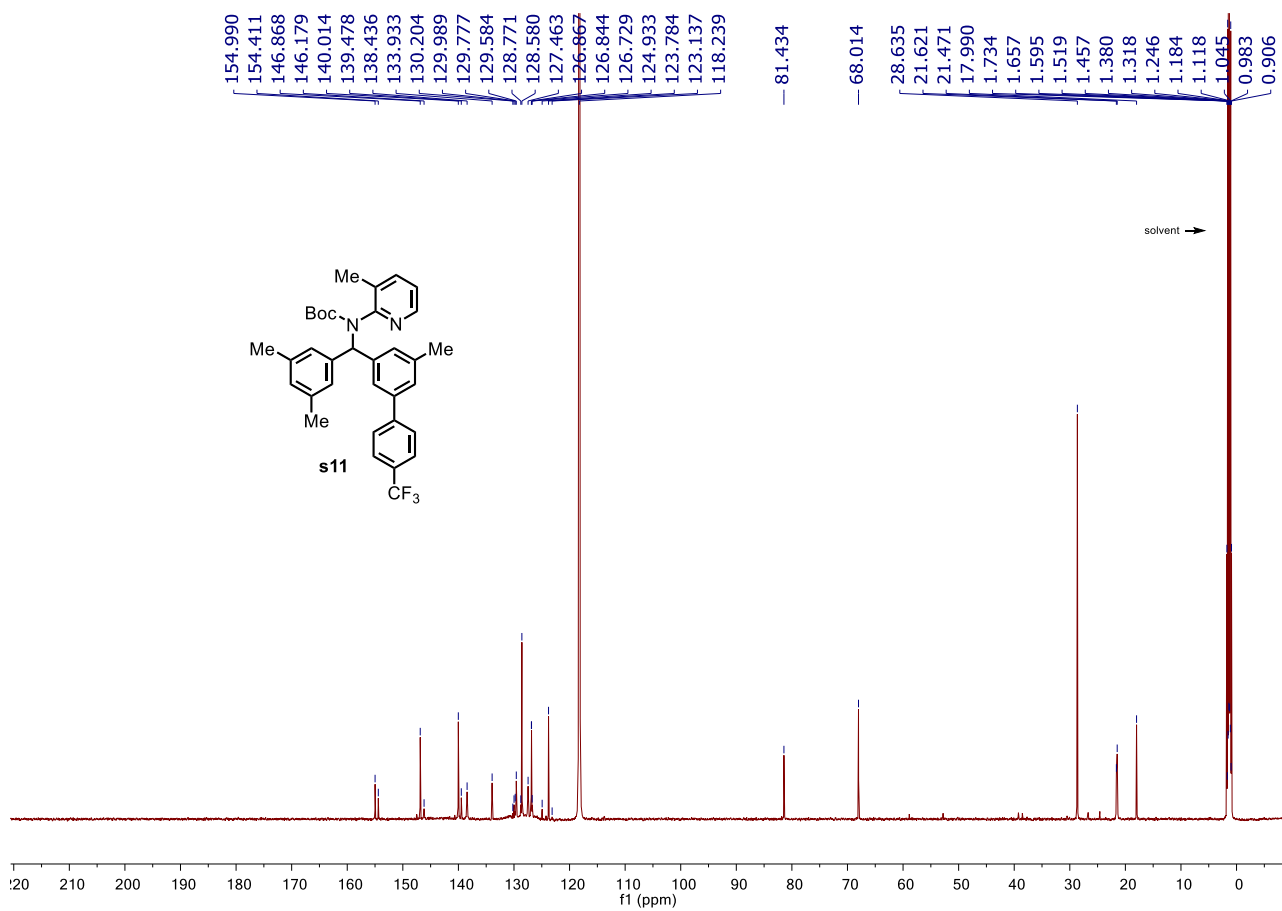

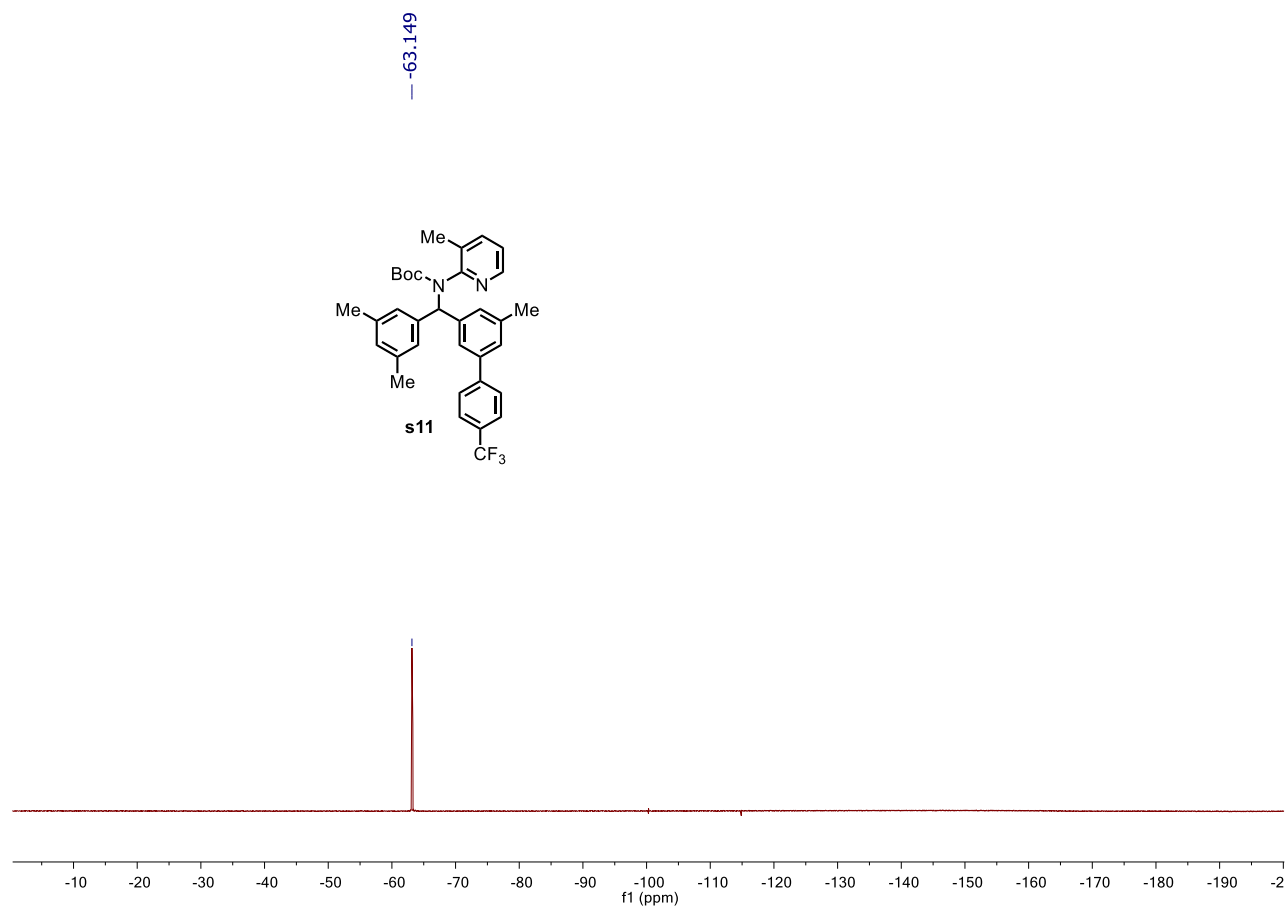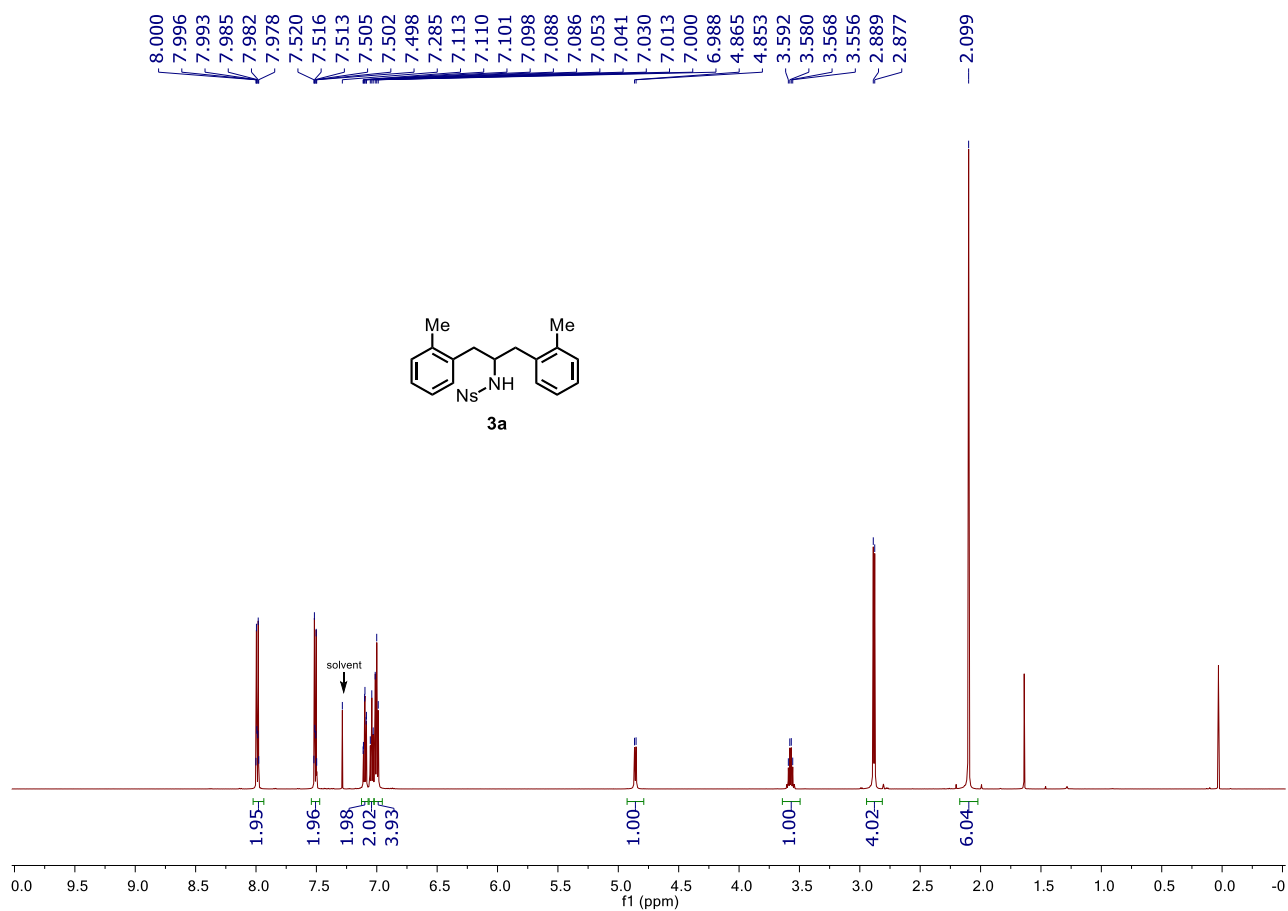

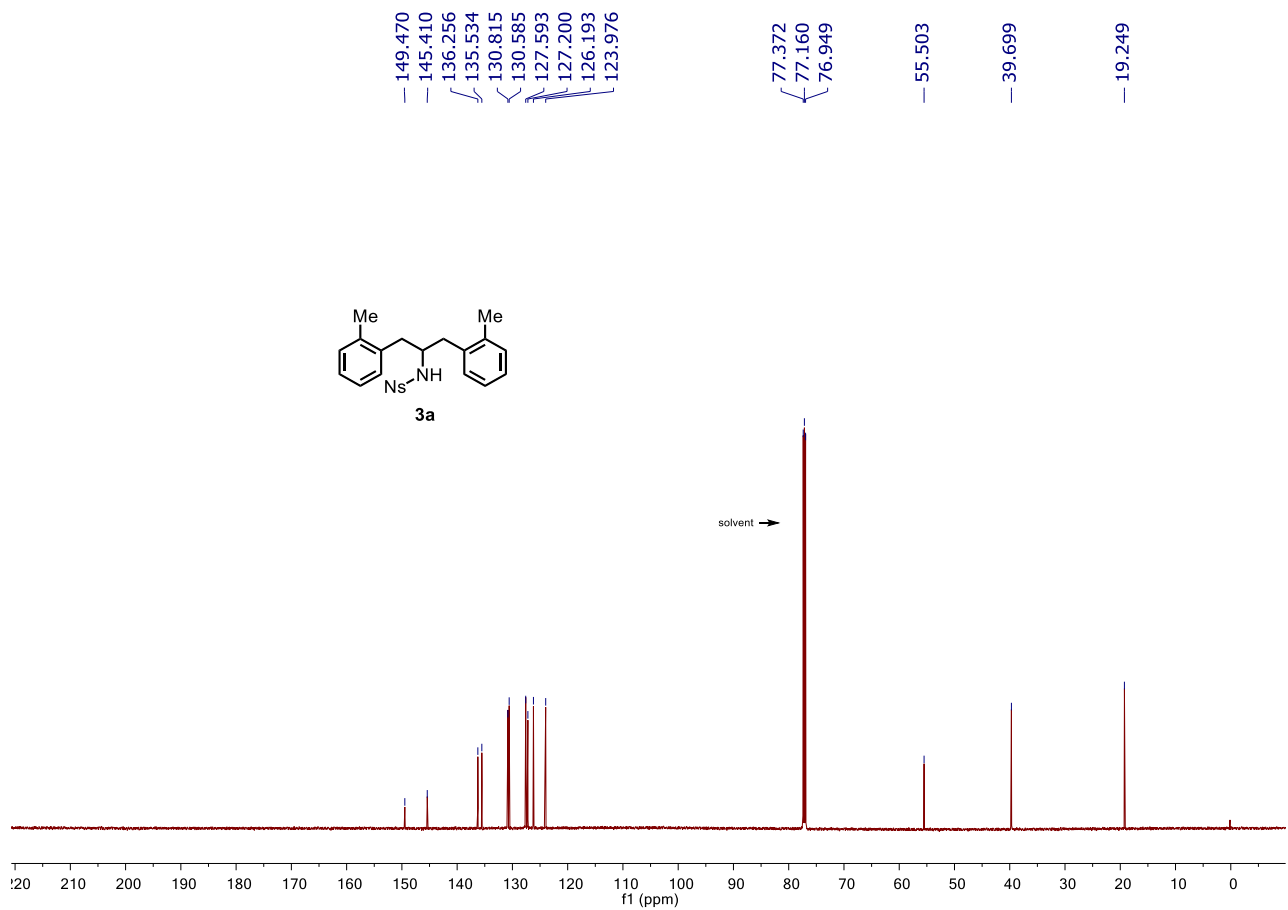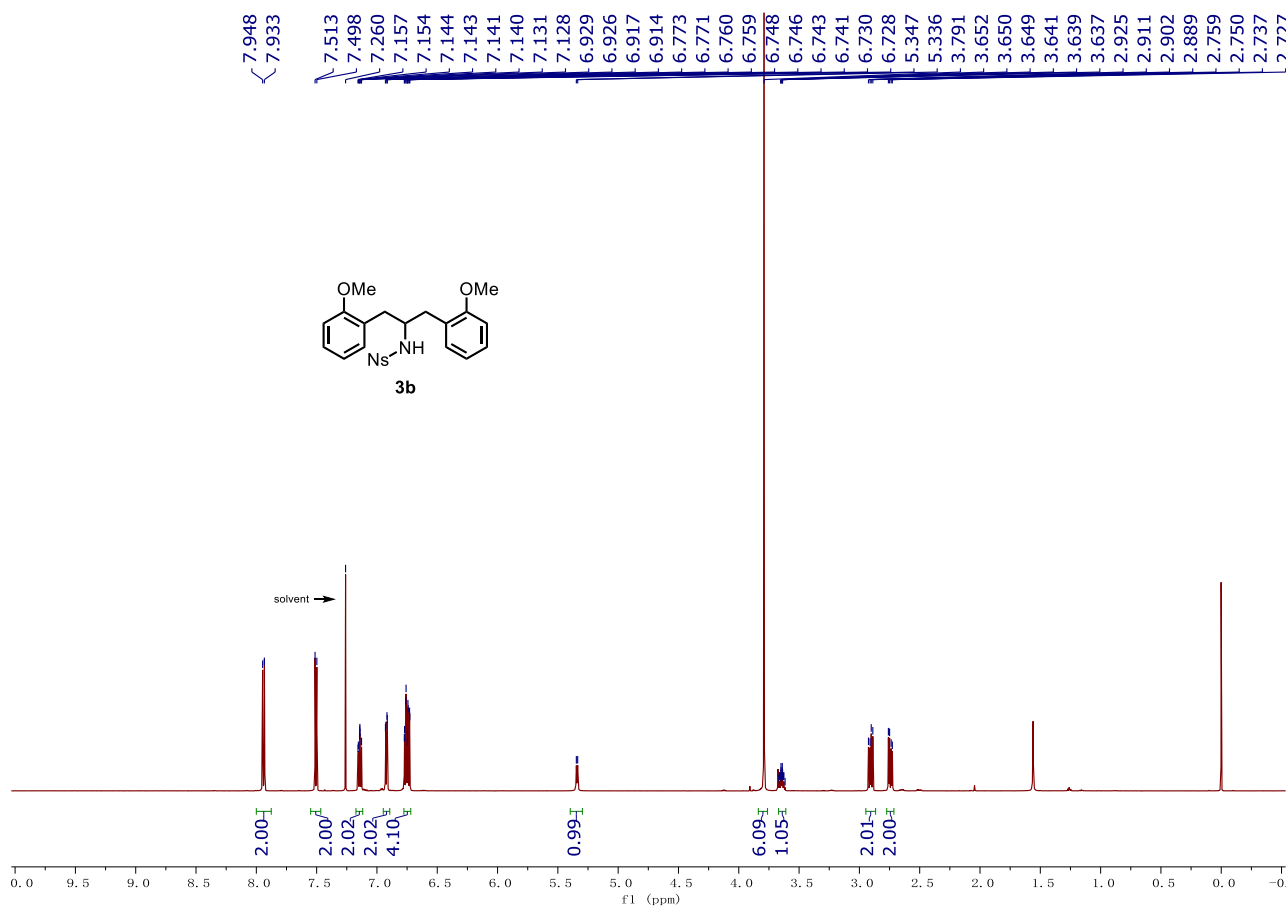

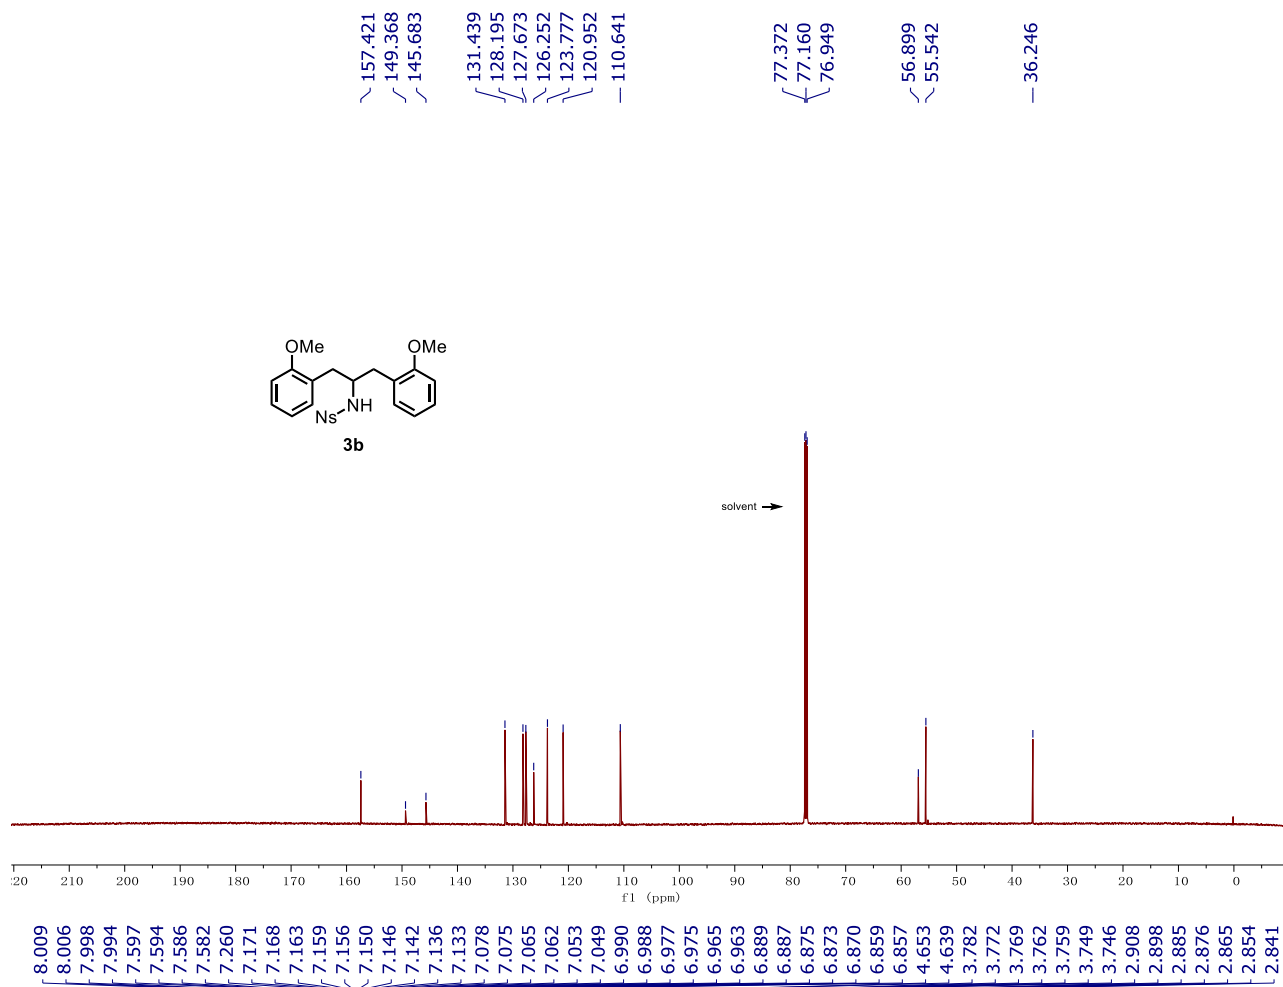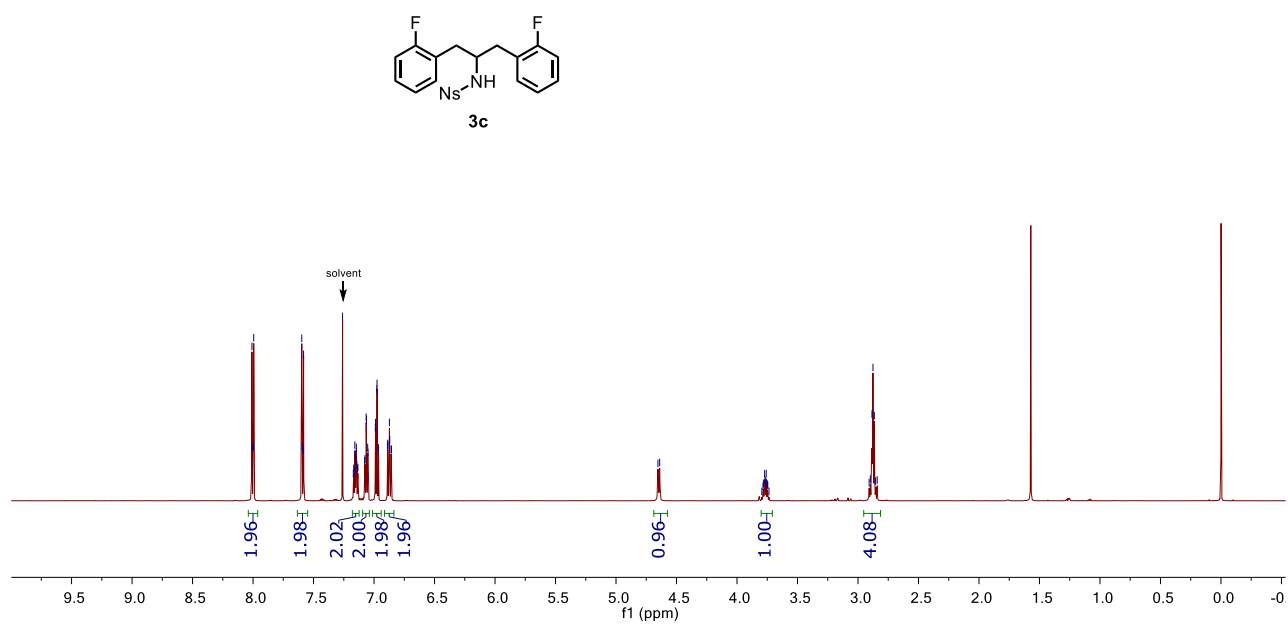



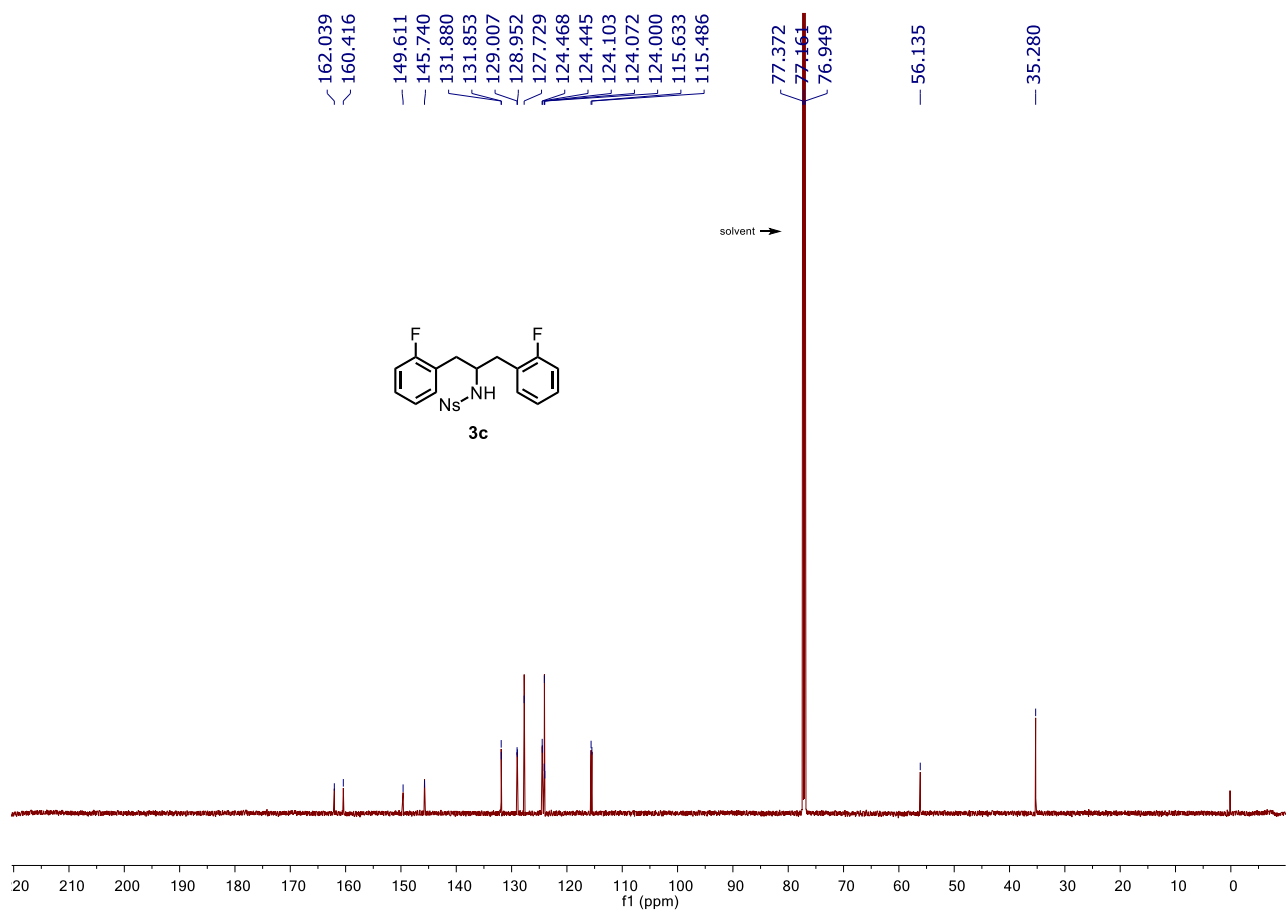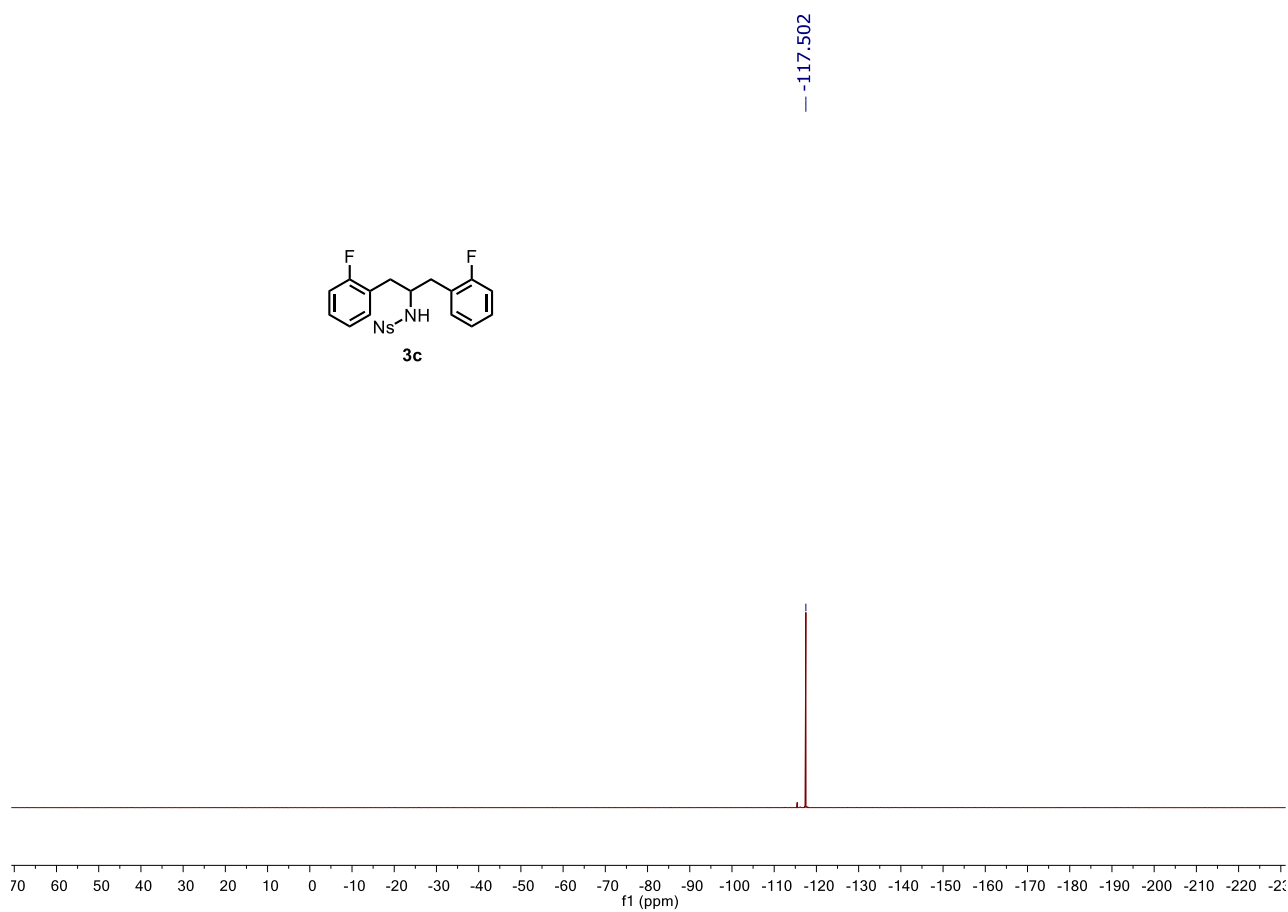

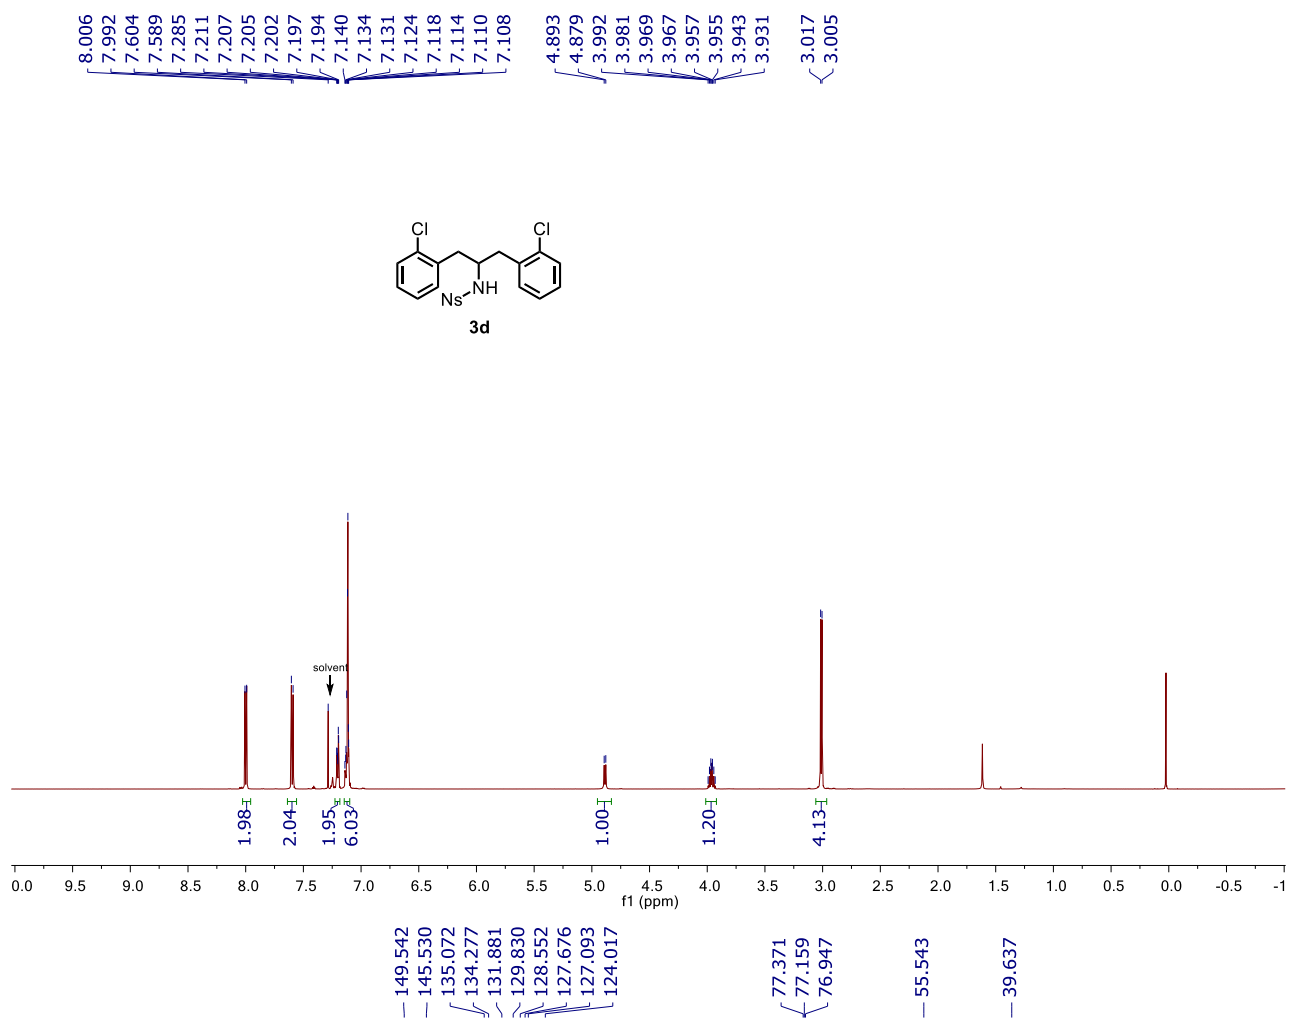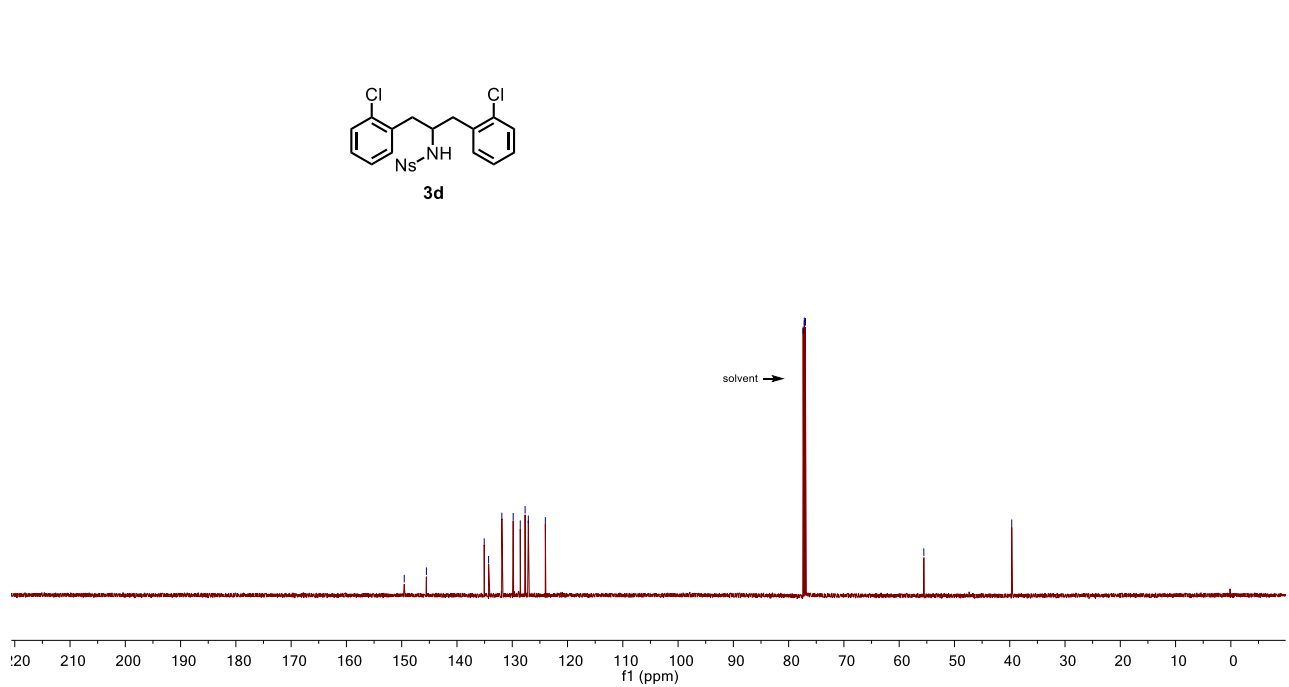

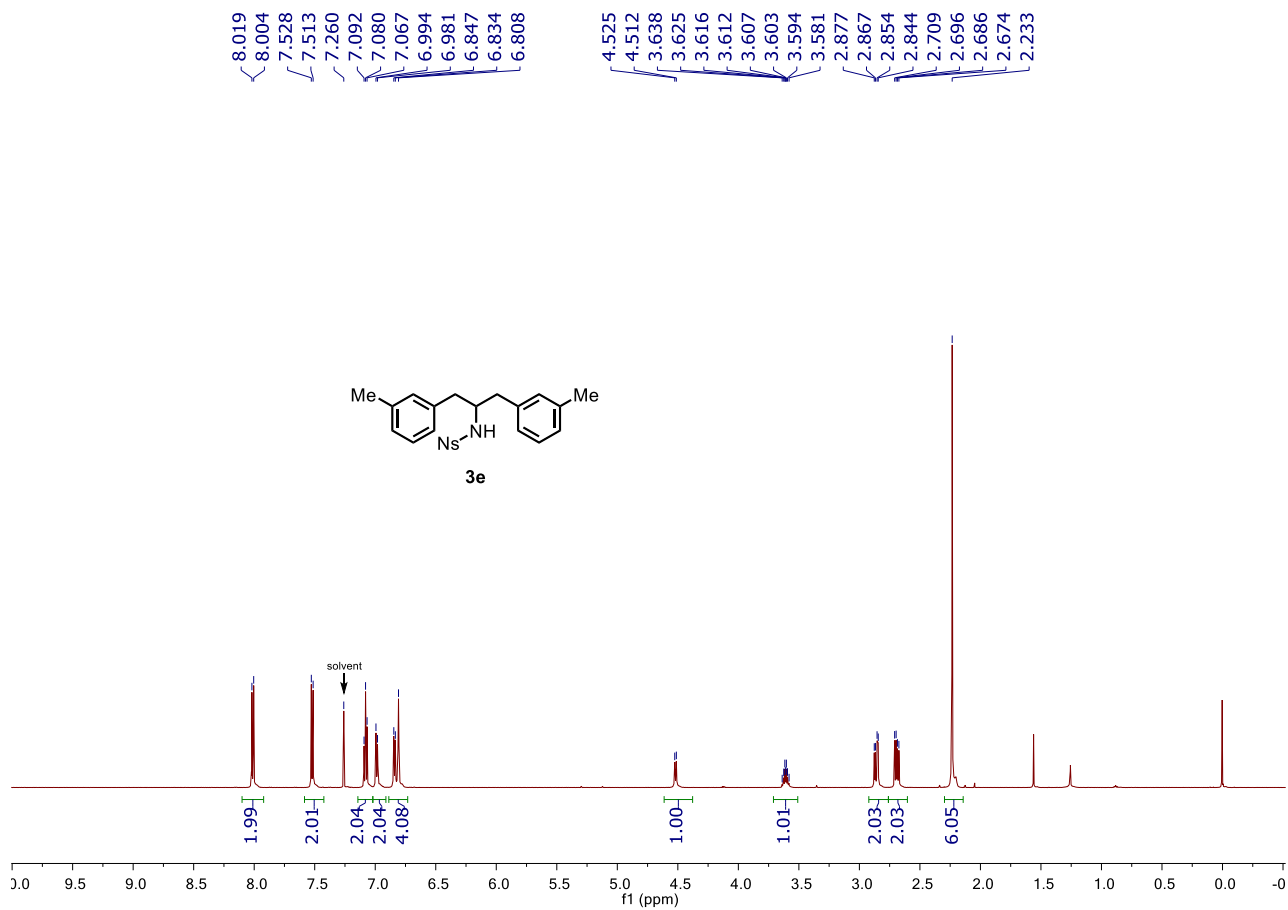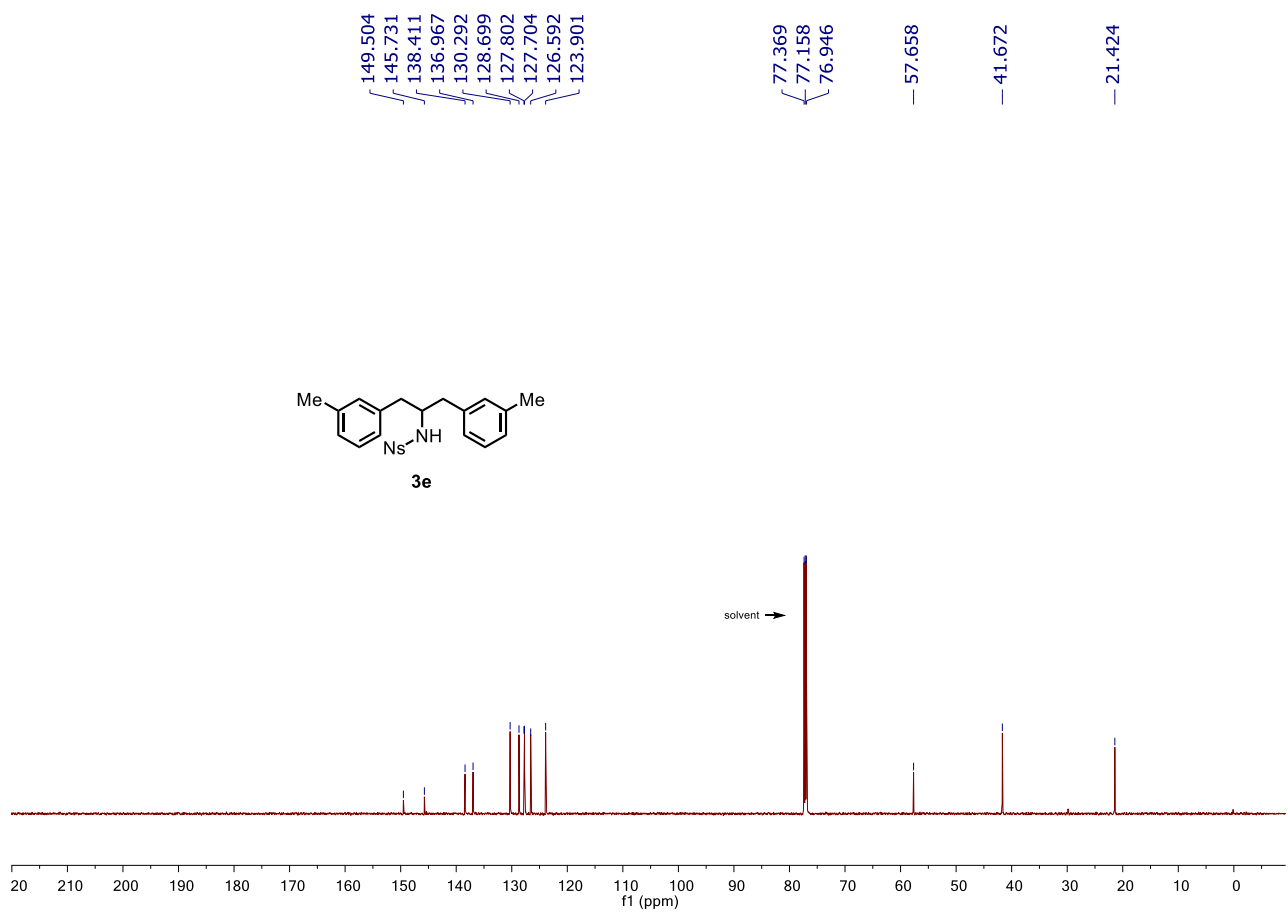

8.070  
8.055  
7.603  
7.588  
7.260  
7.233  
7.220  
7.207  
7.058  
7.044  
6.985  
6.973  
6.868  
4.628  
4.614  
3.712  
3.703  
3.700  
3.690  
3.687  
3.681  
3.677  
3.667  
3.664  
3.654  
2.935  
2.925  
2.912  
2.902  
2.775  
2.762  
2.751  
2.739

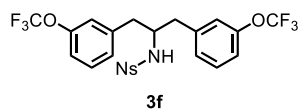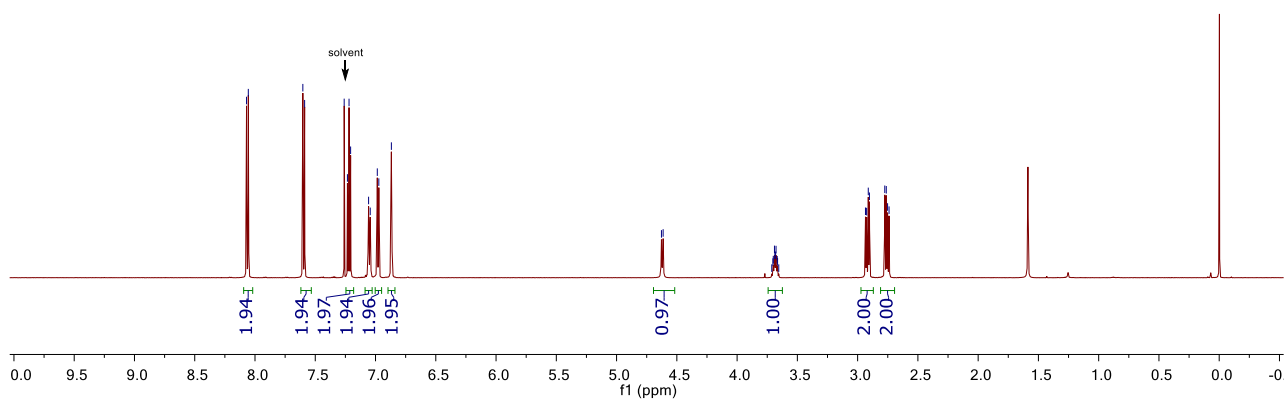

149.810  
149.473  
149.463  
149.451  
149.440  
145.506  
139.062  
130.215  
127.838  
127.709  
123.023  
121.962  
121.317  
119.610  
119.568  
117.904  
77.371  
77.160  
76.948  
57.227  
41.423

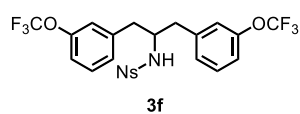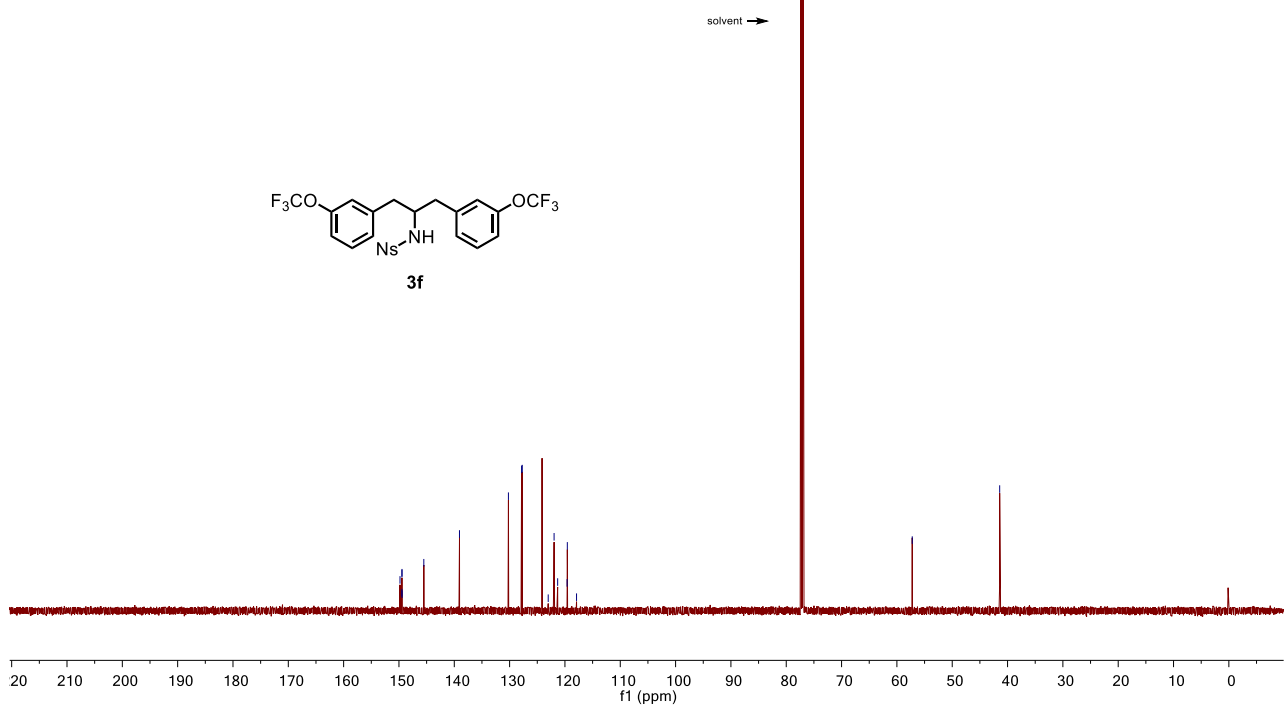

— -58.046

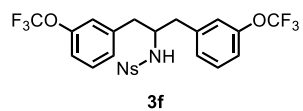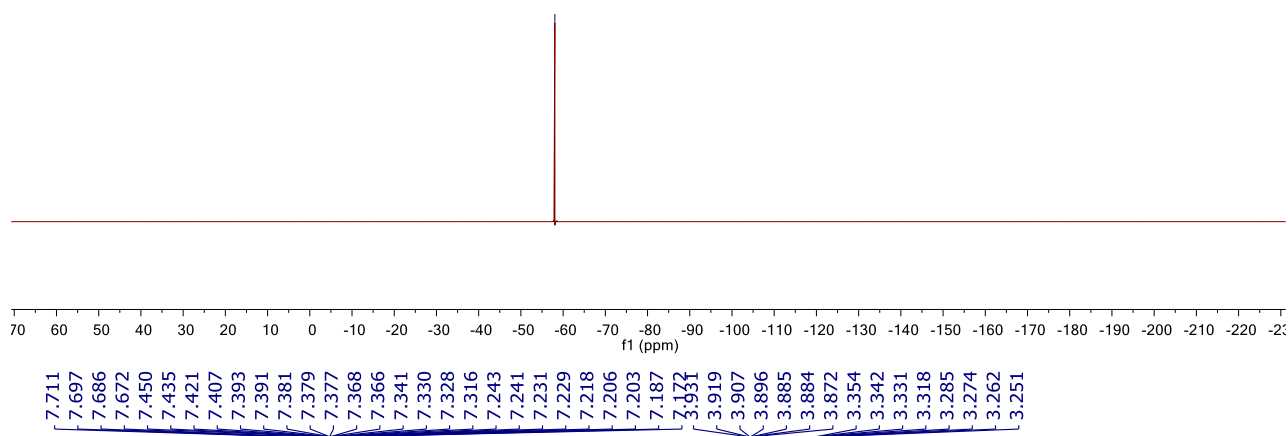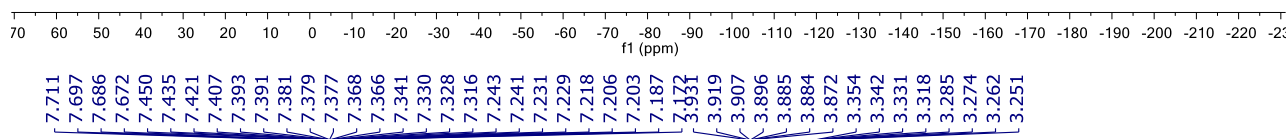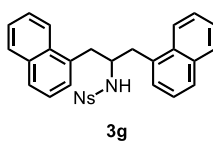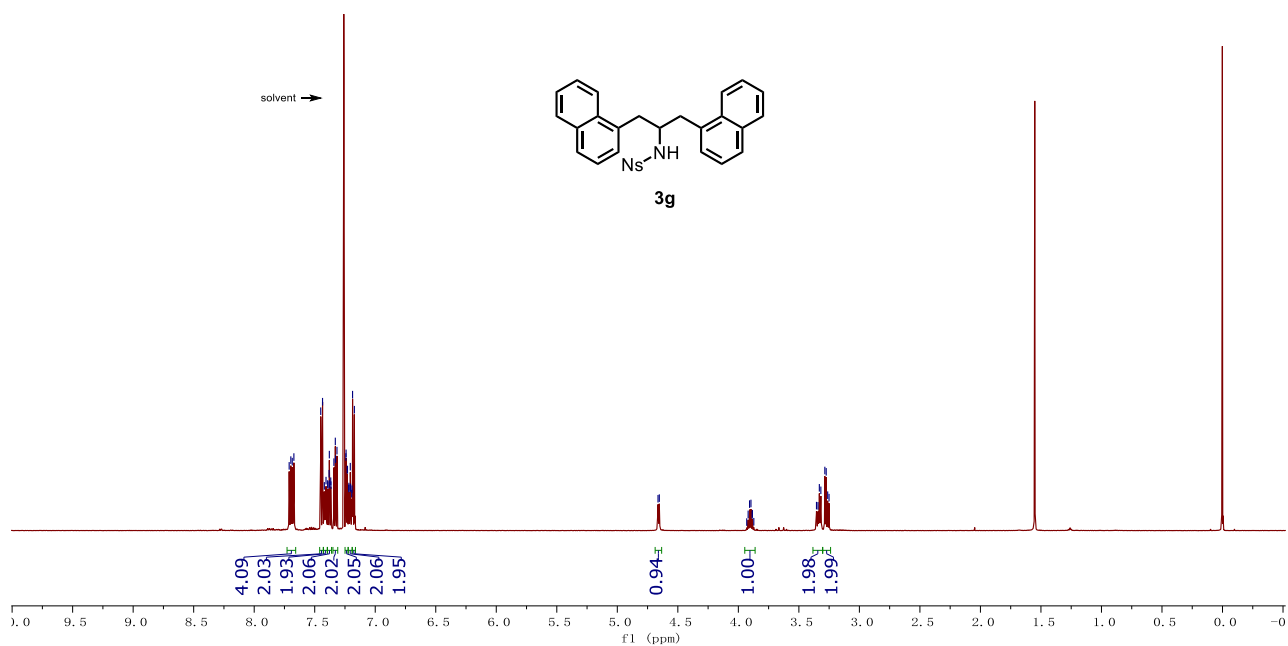

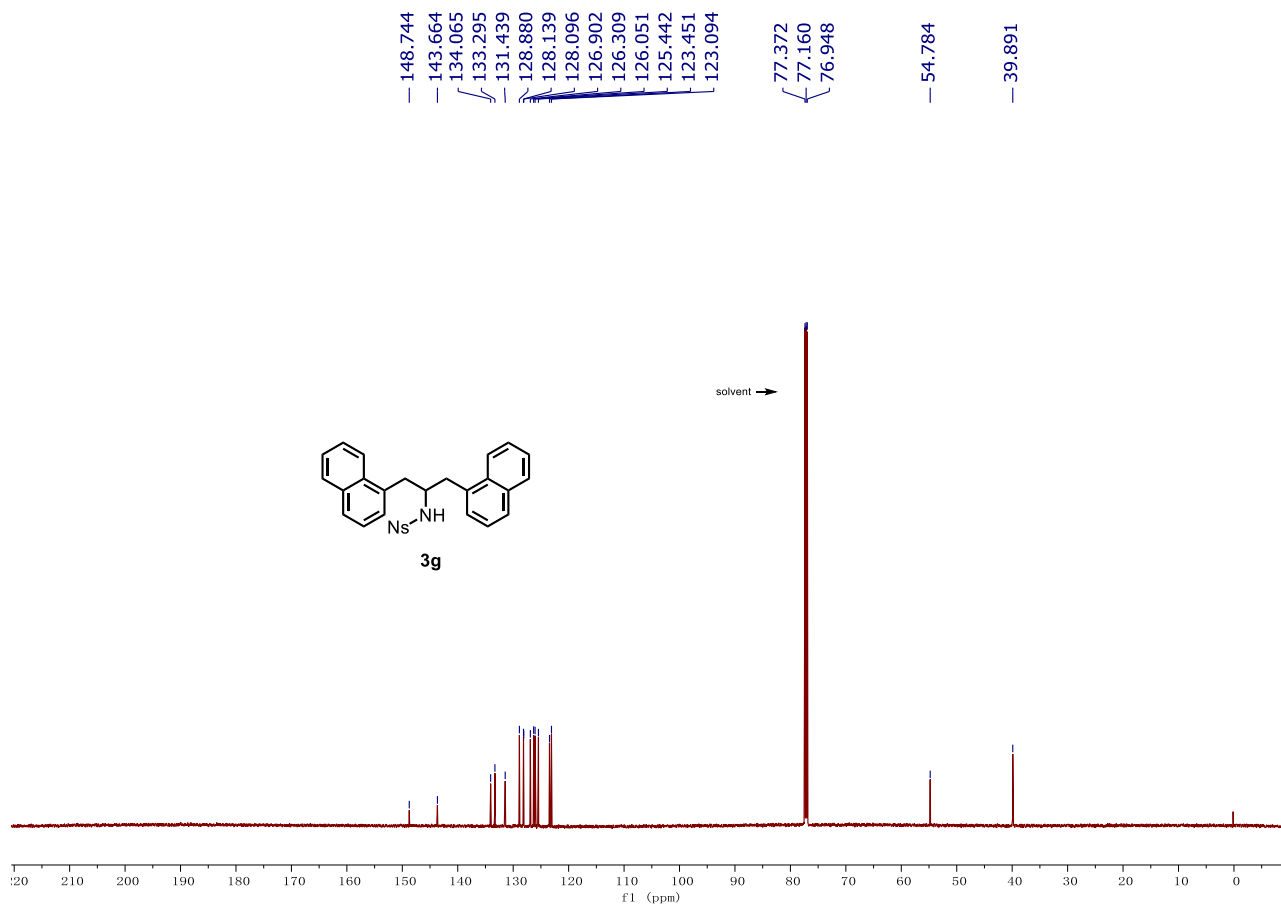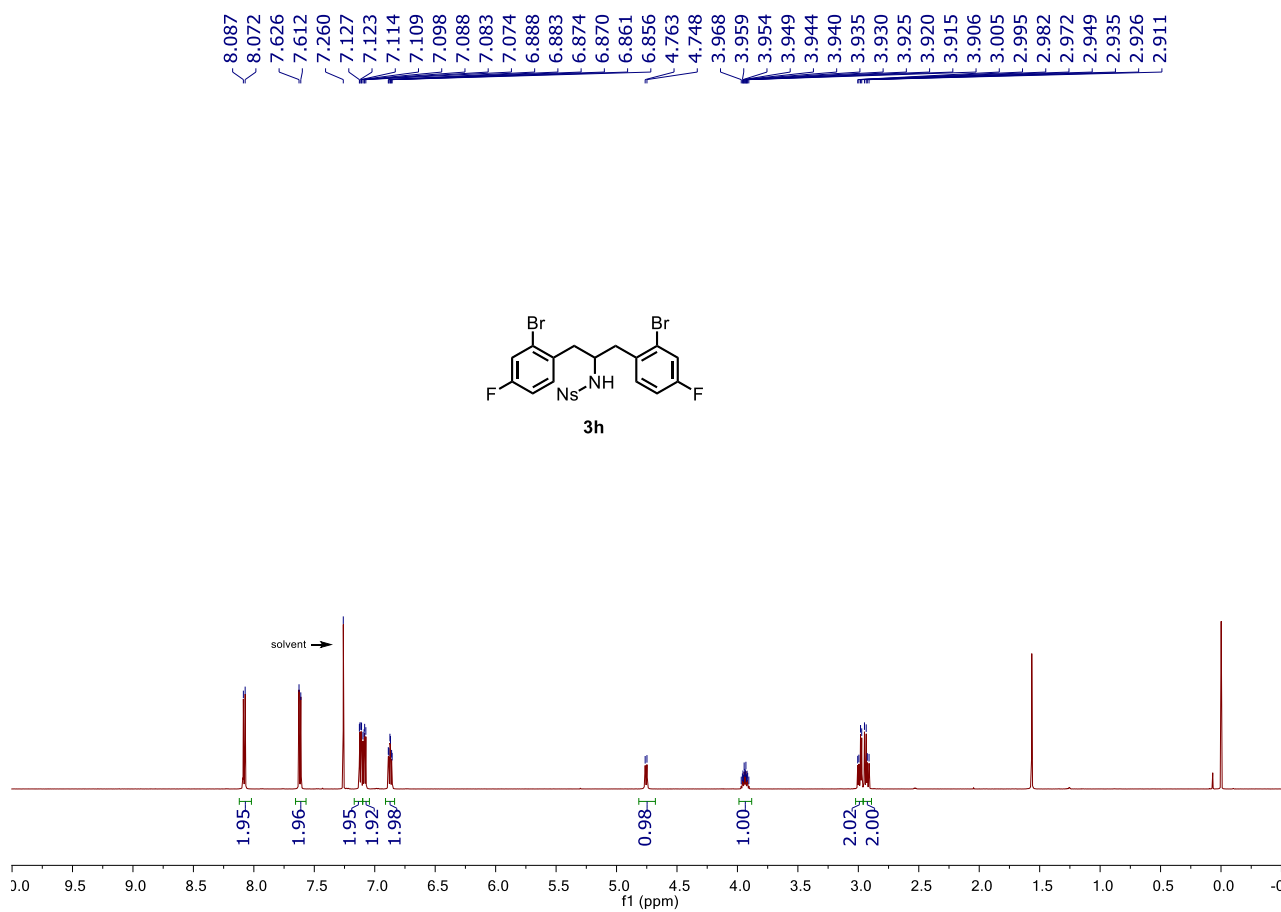

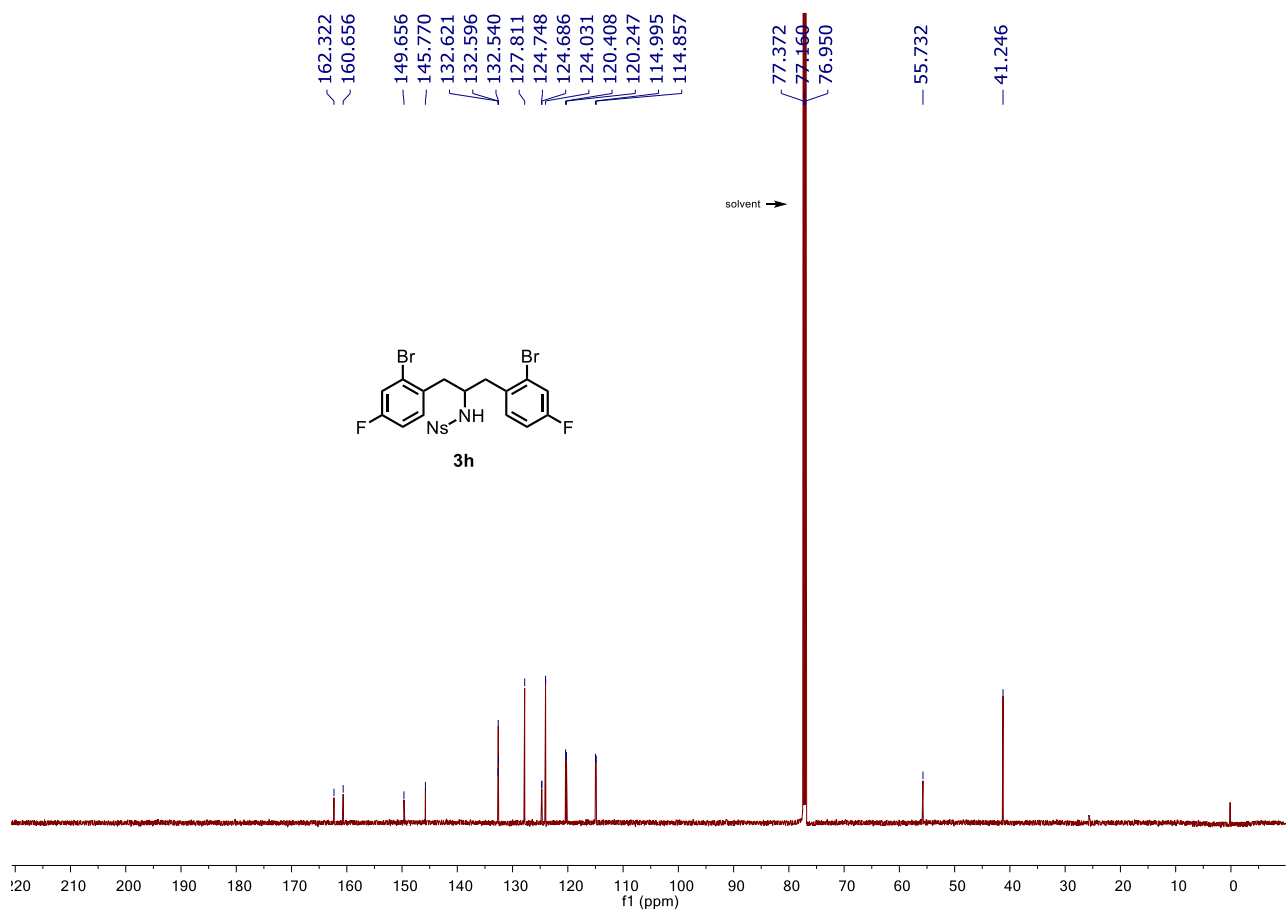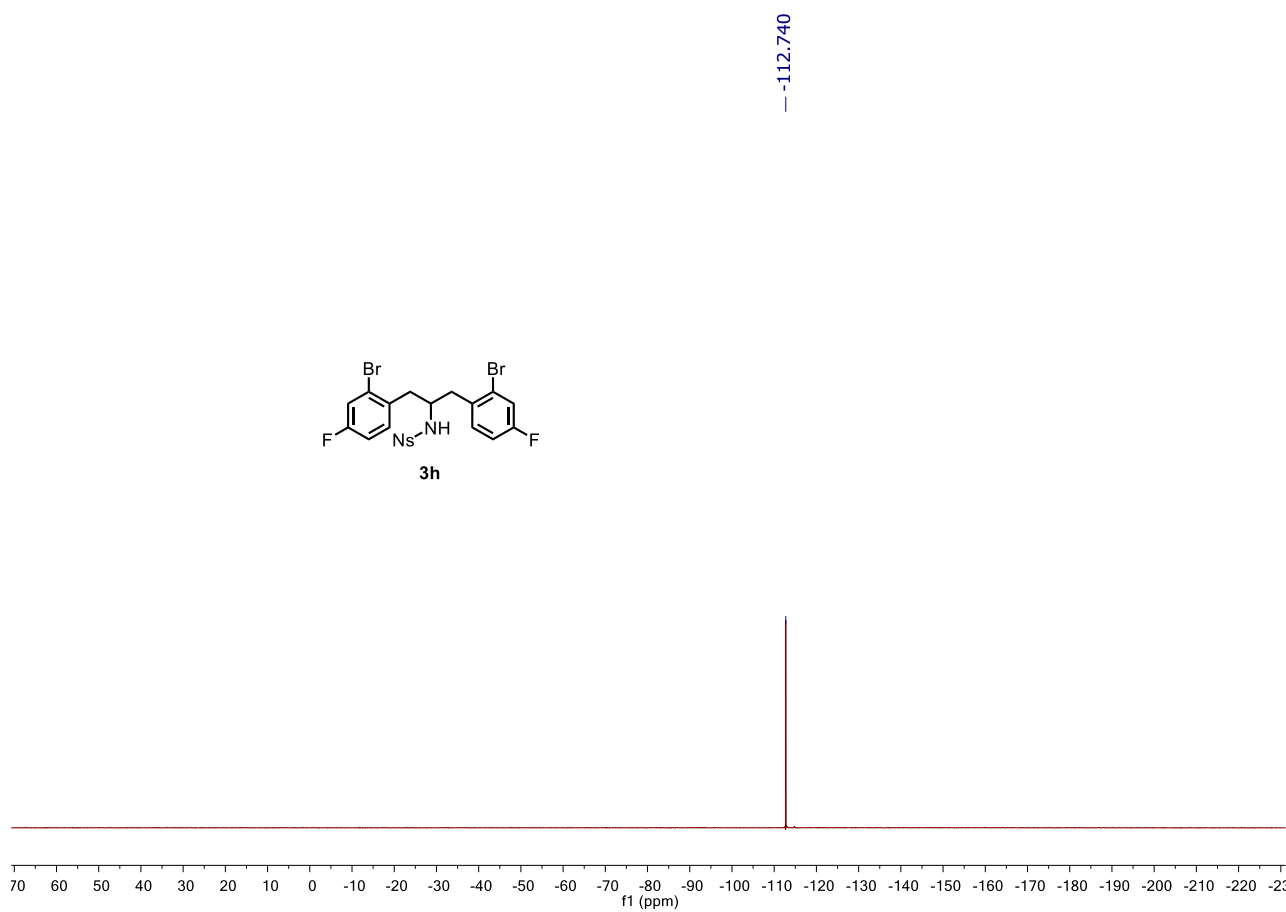

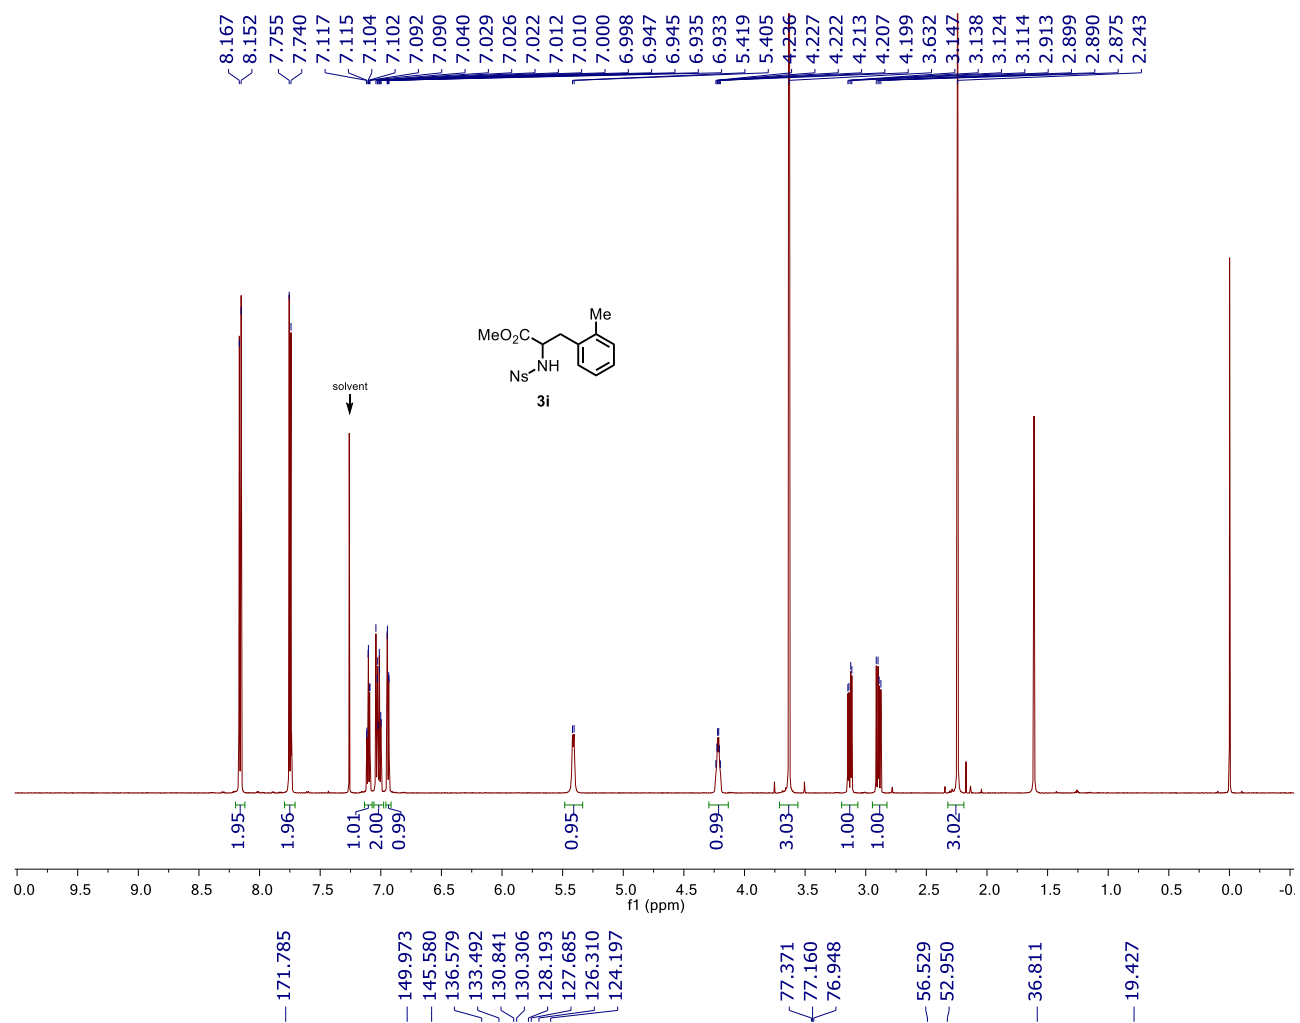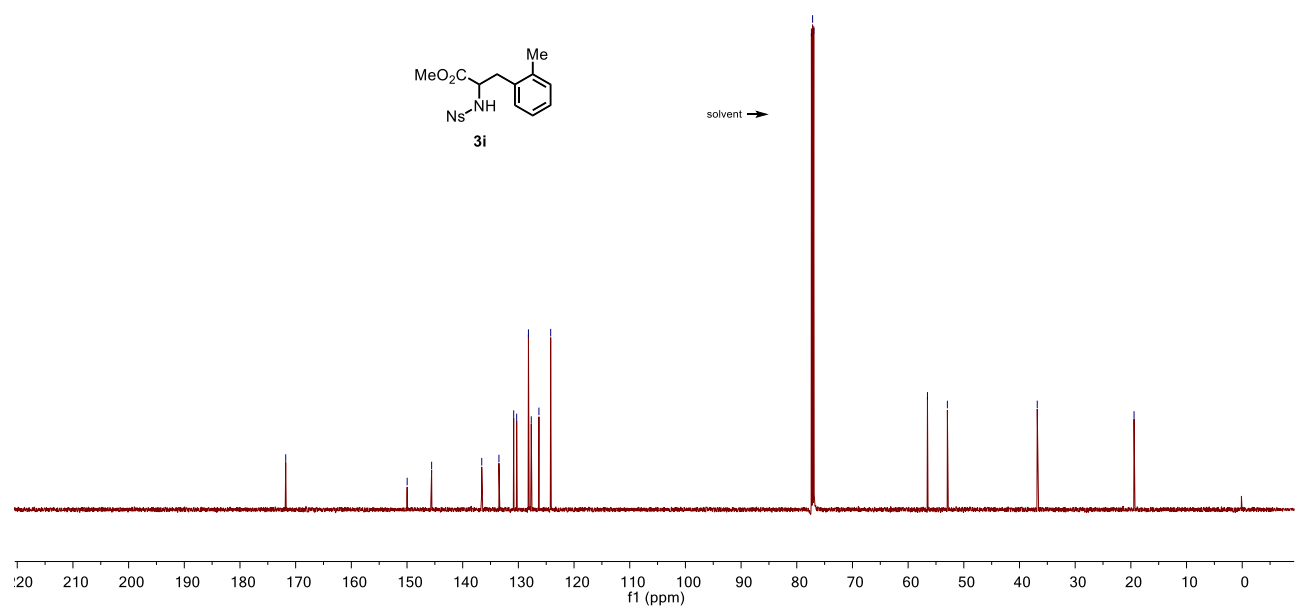



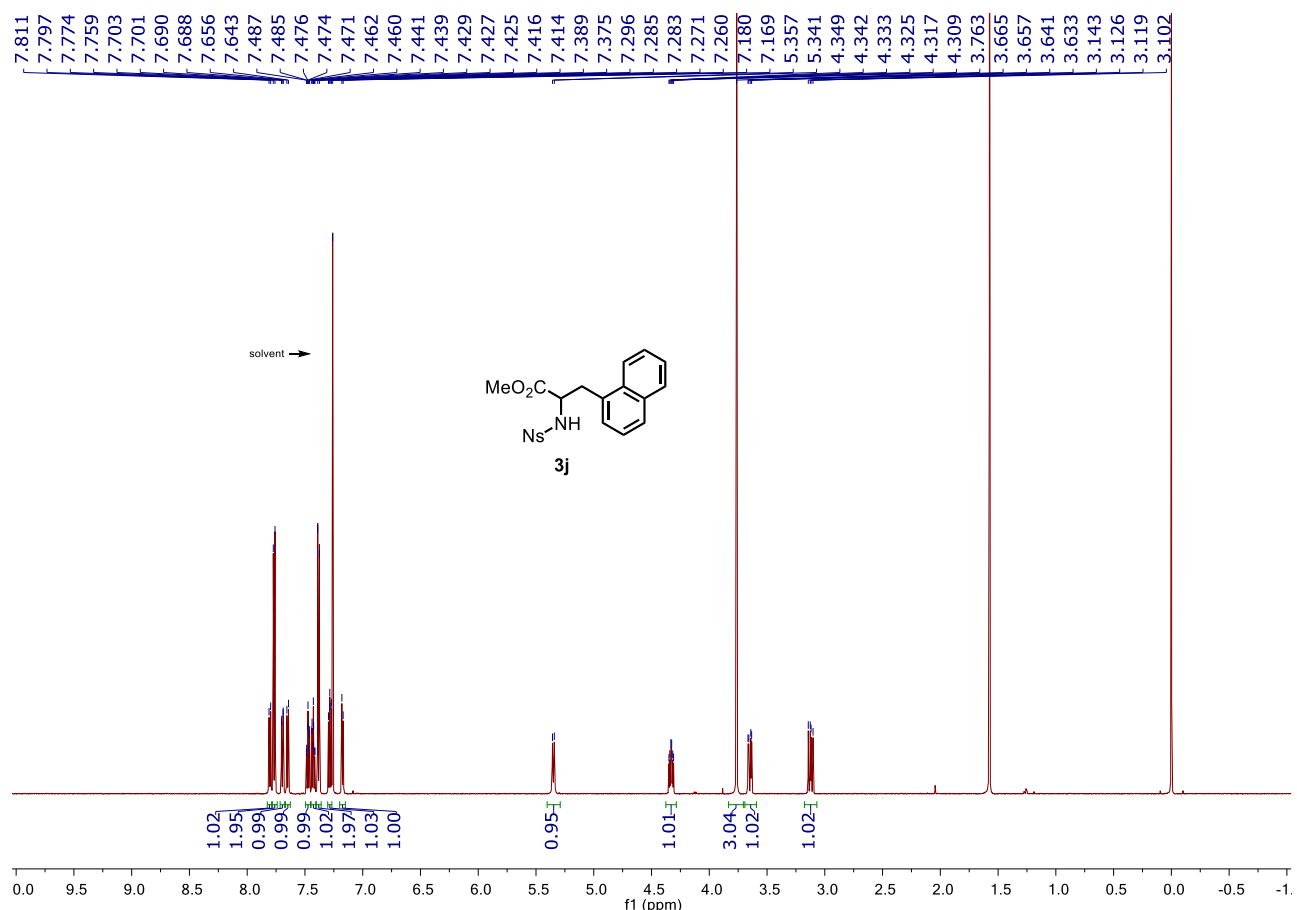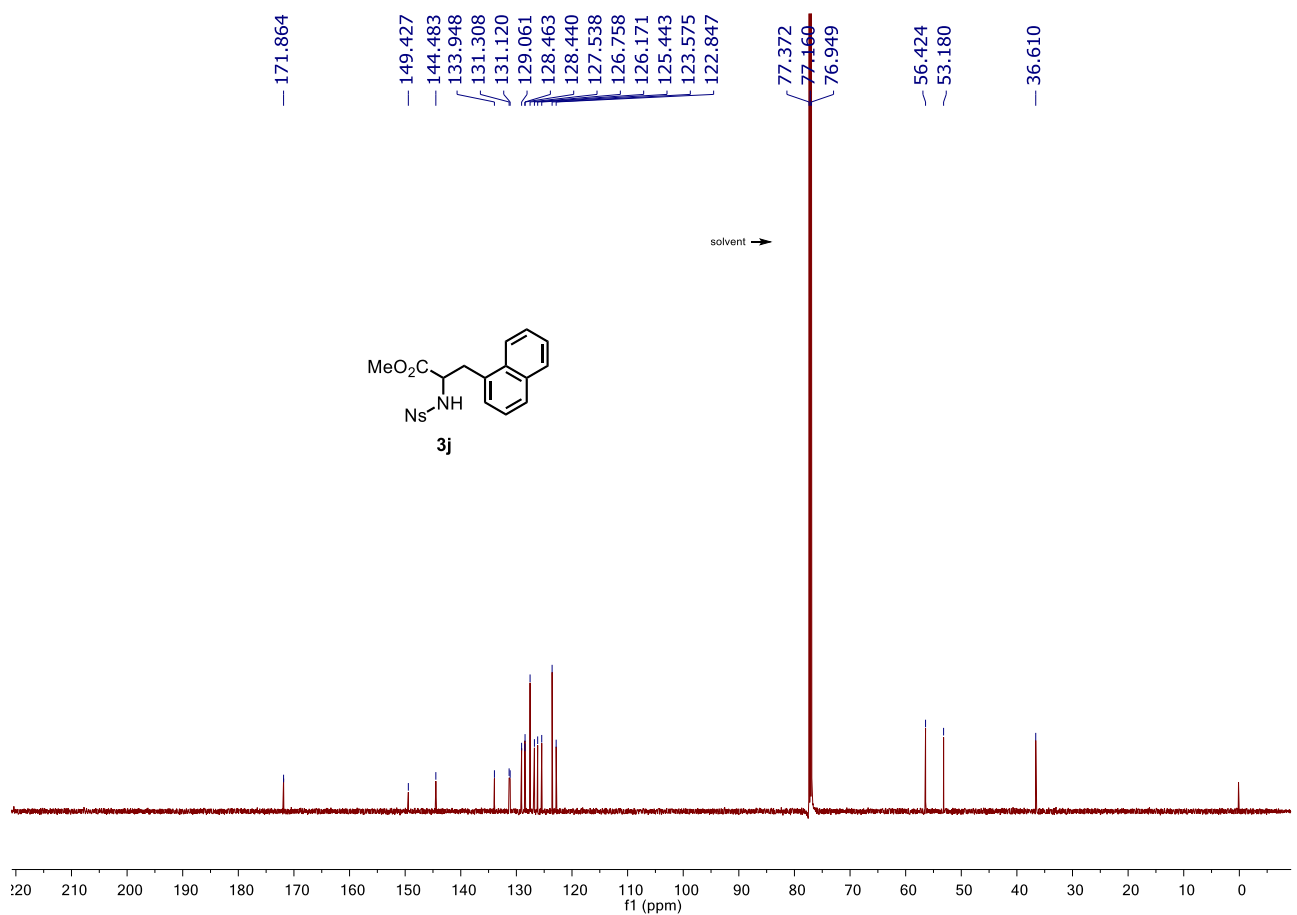

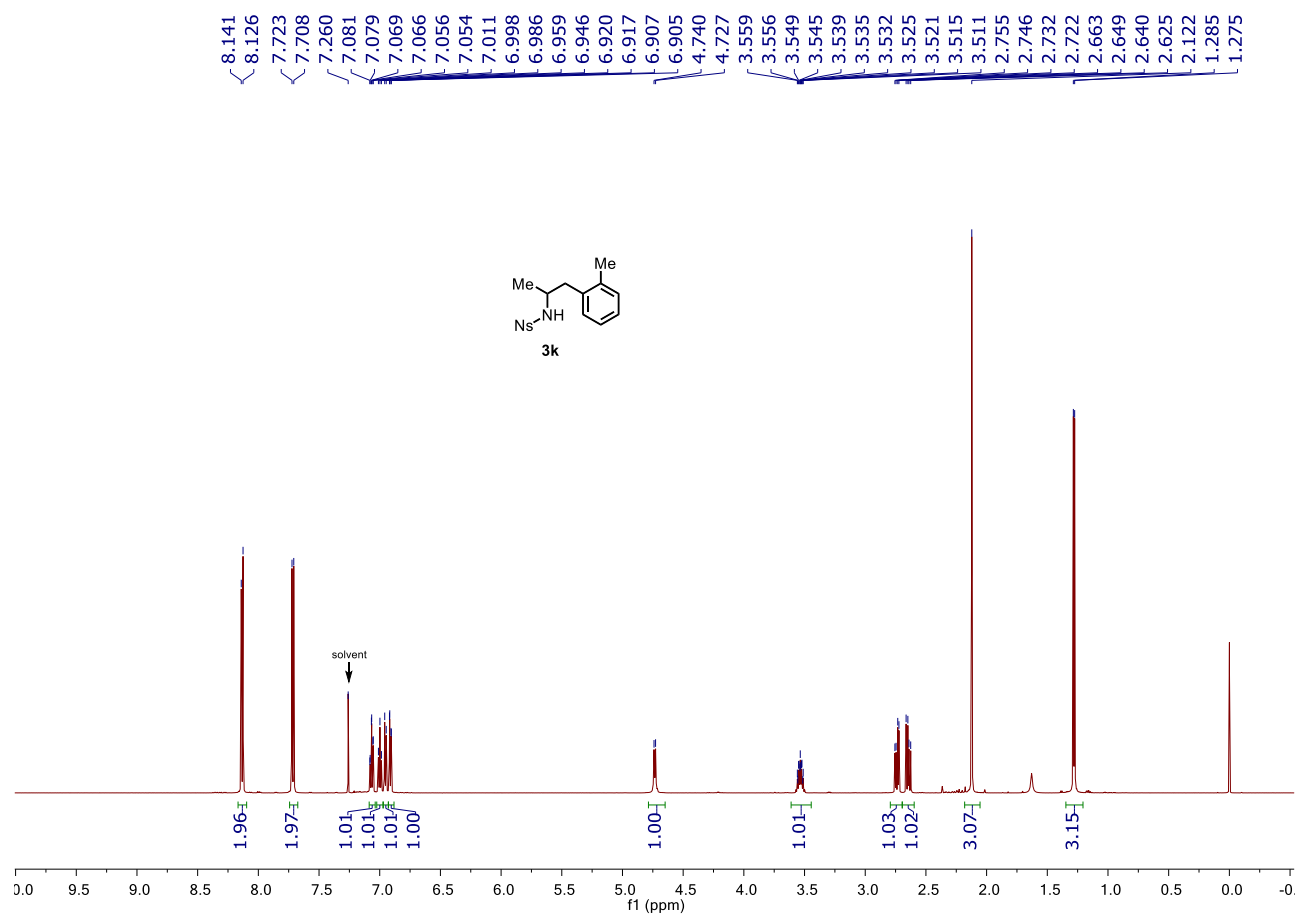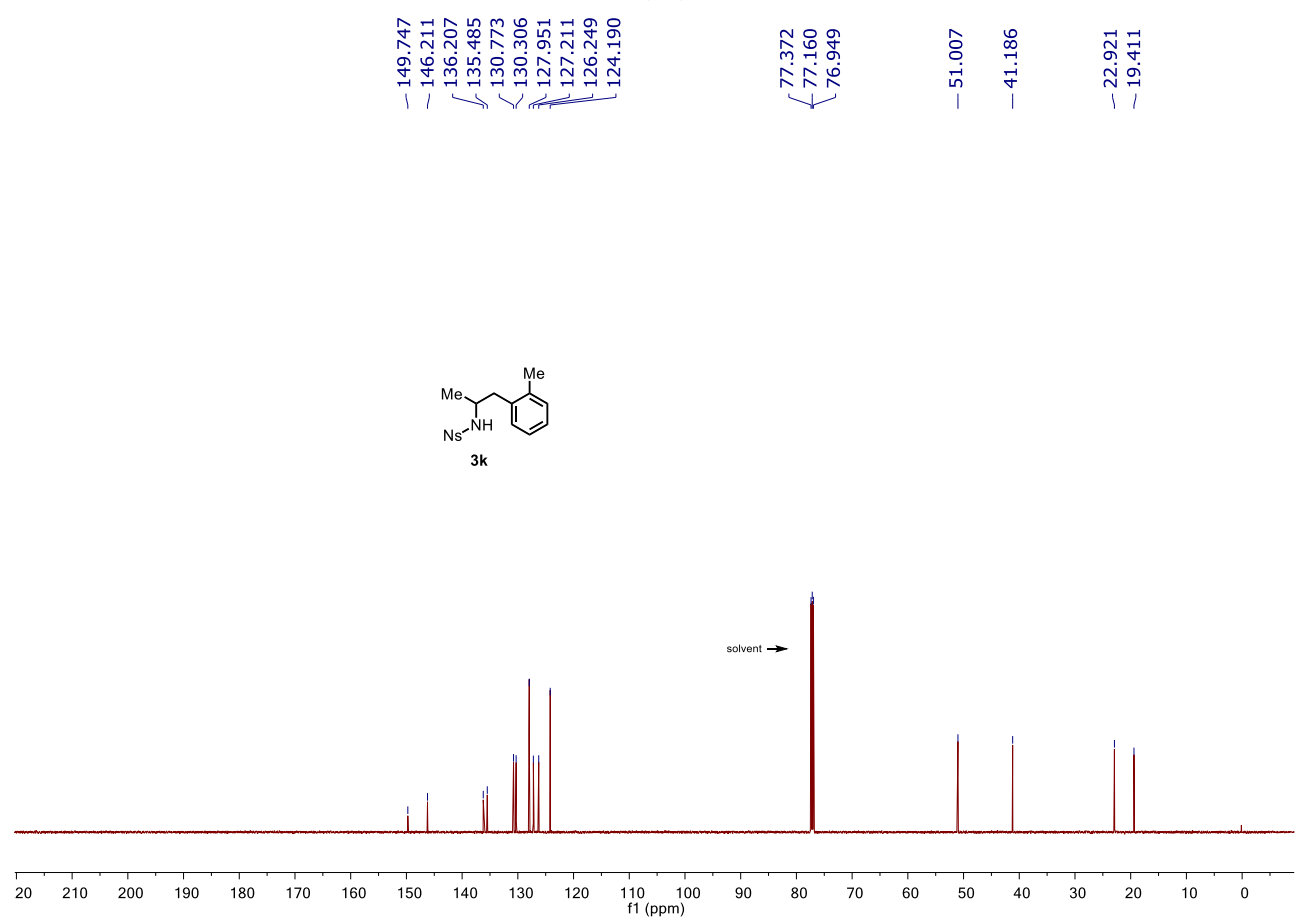

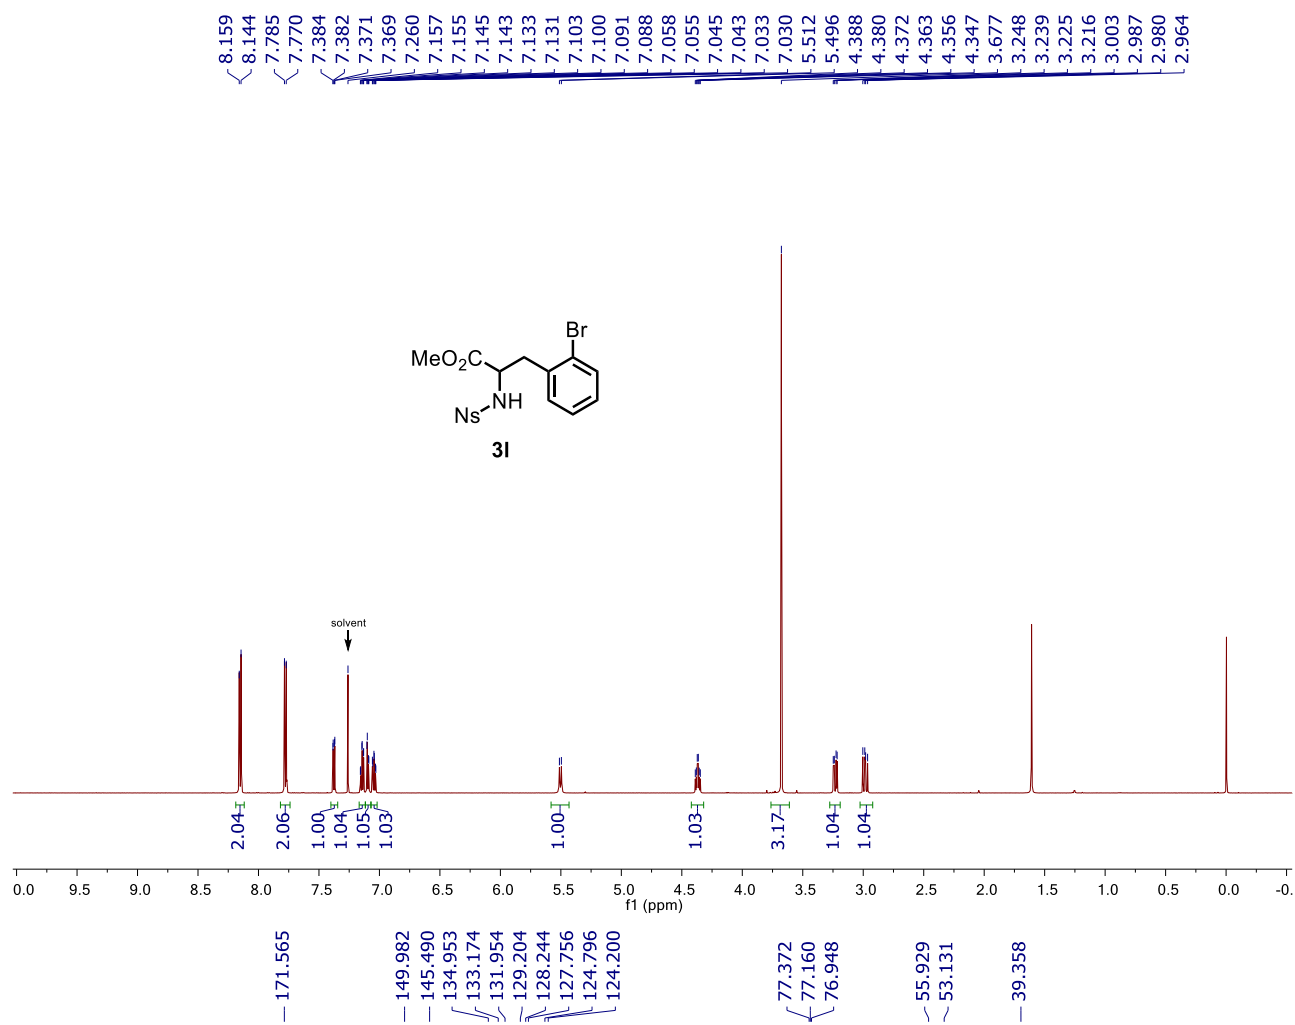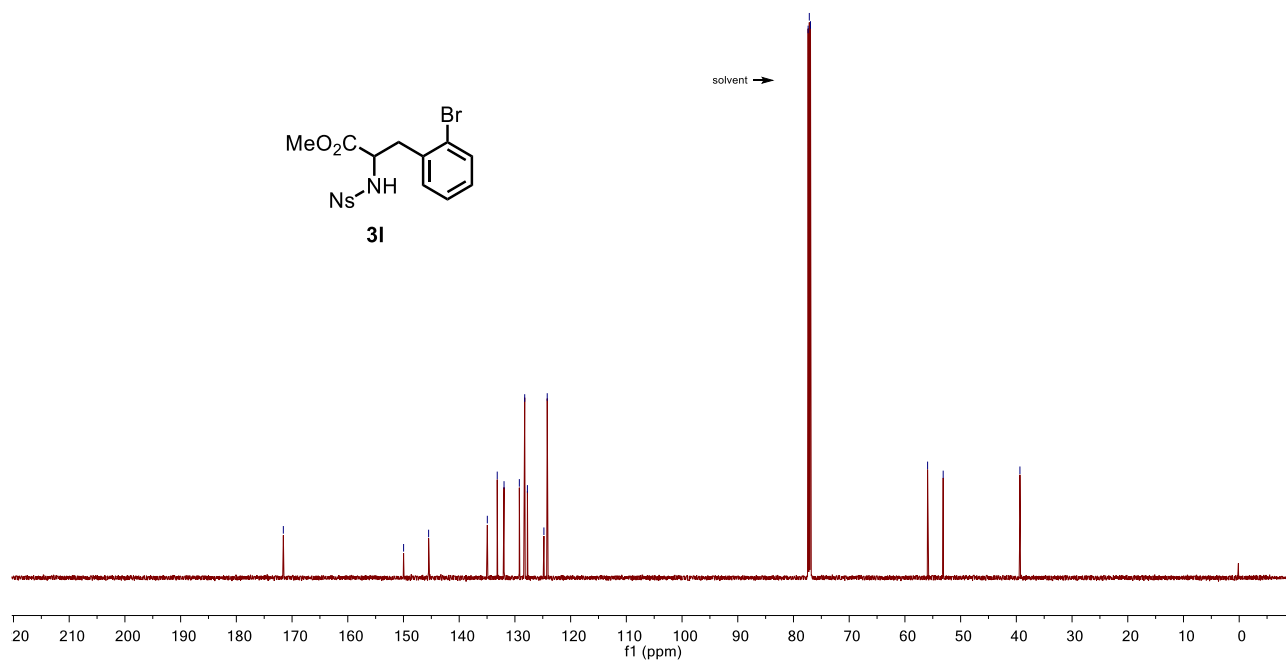



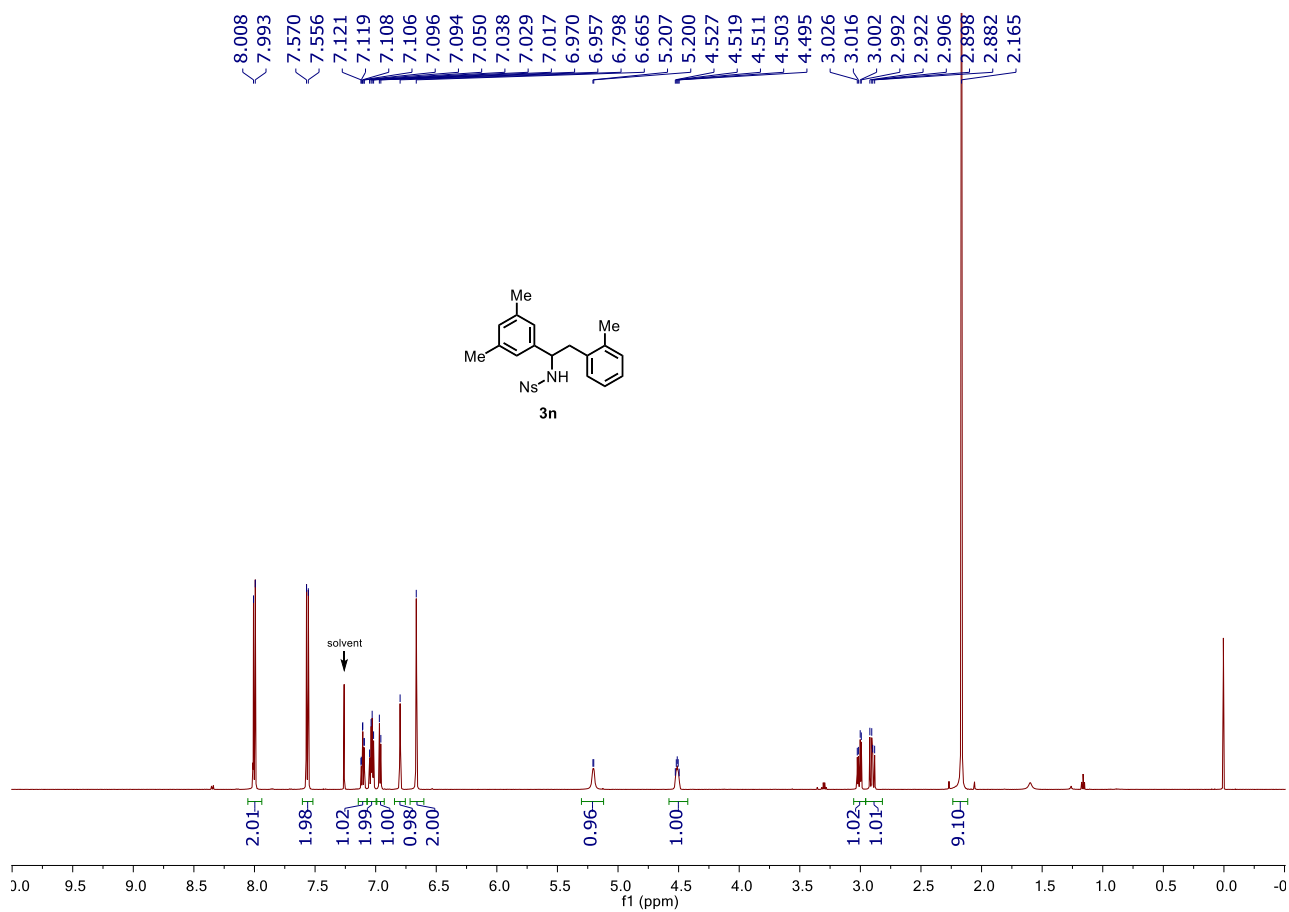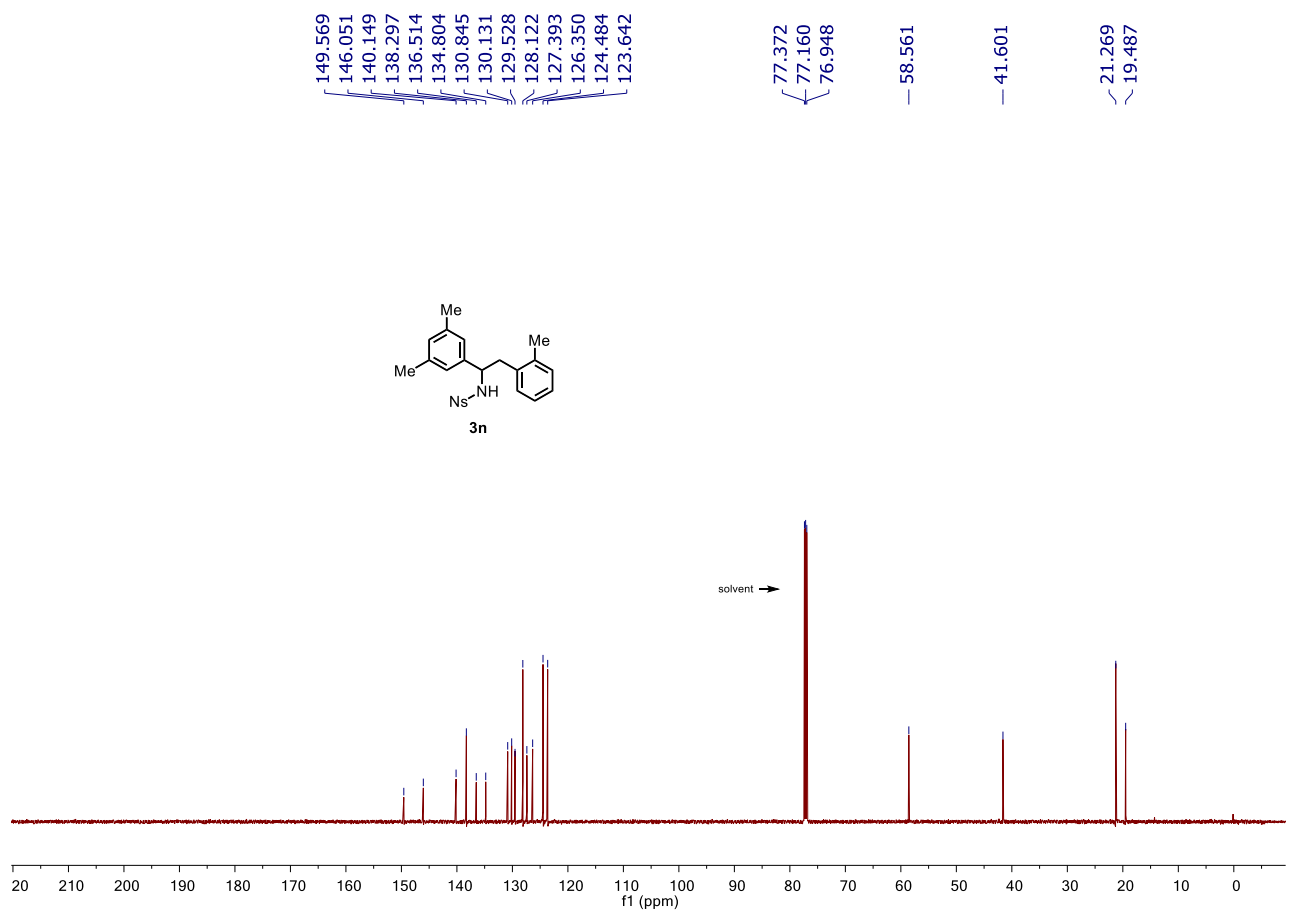

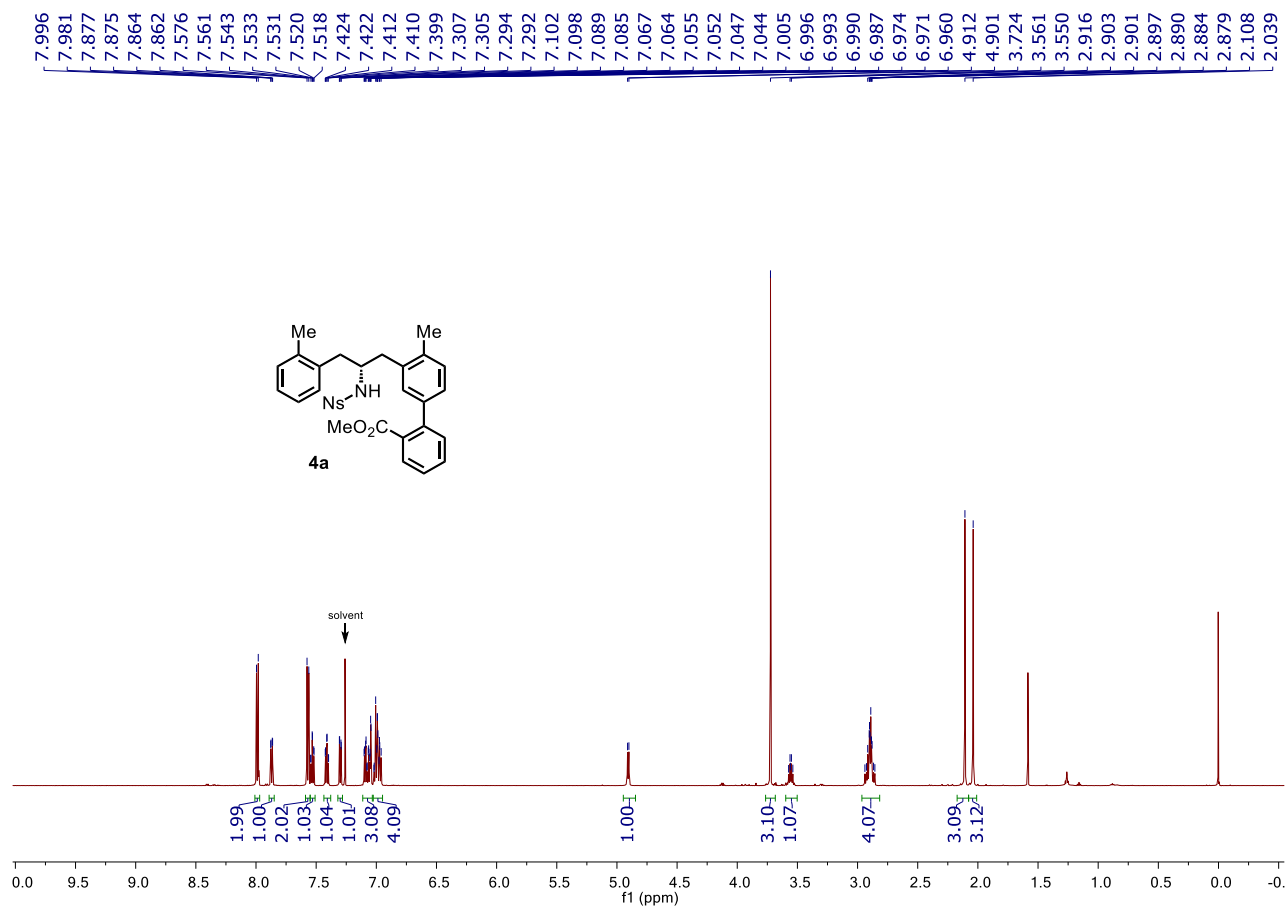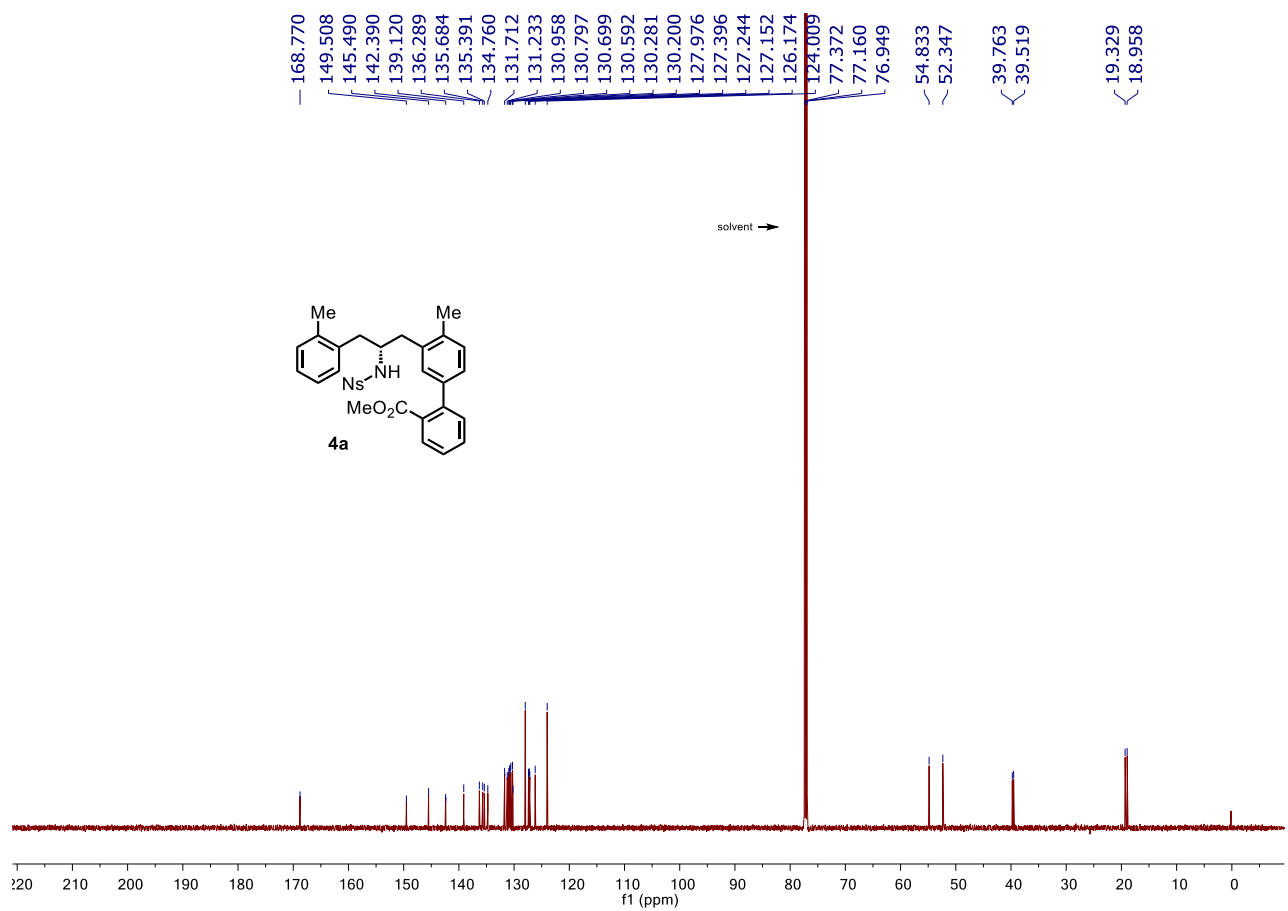

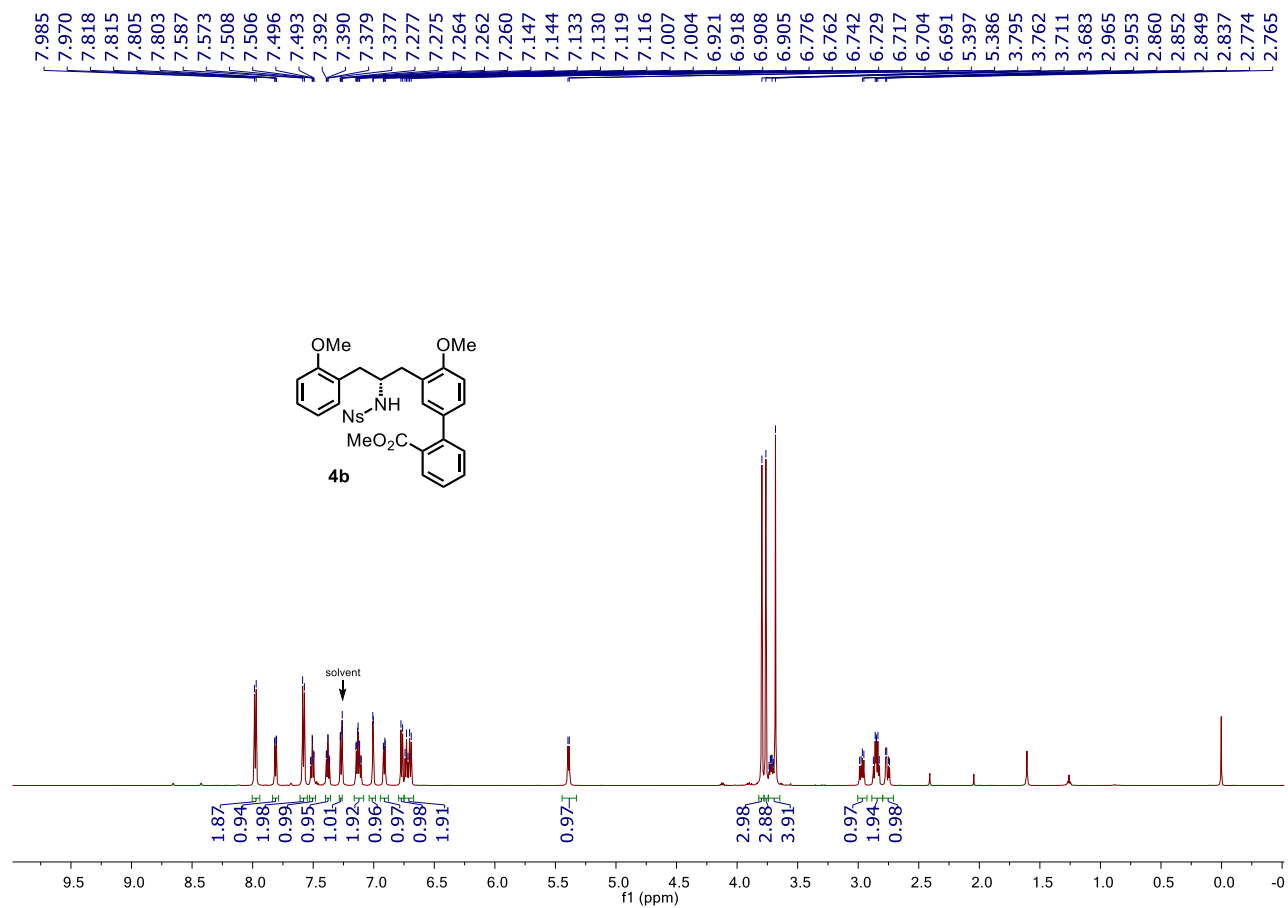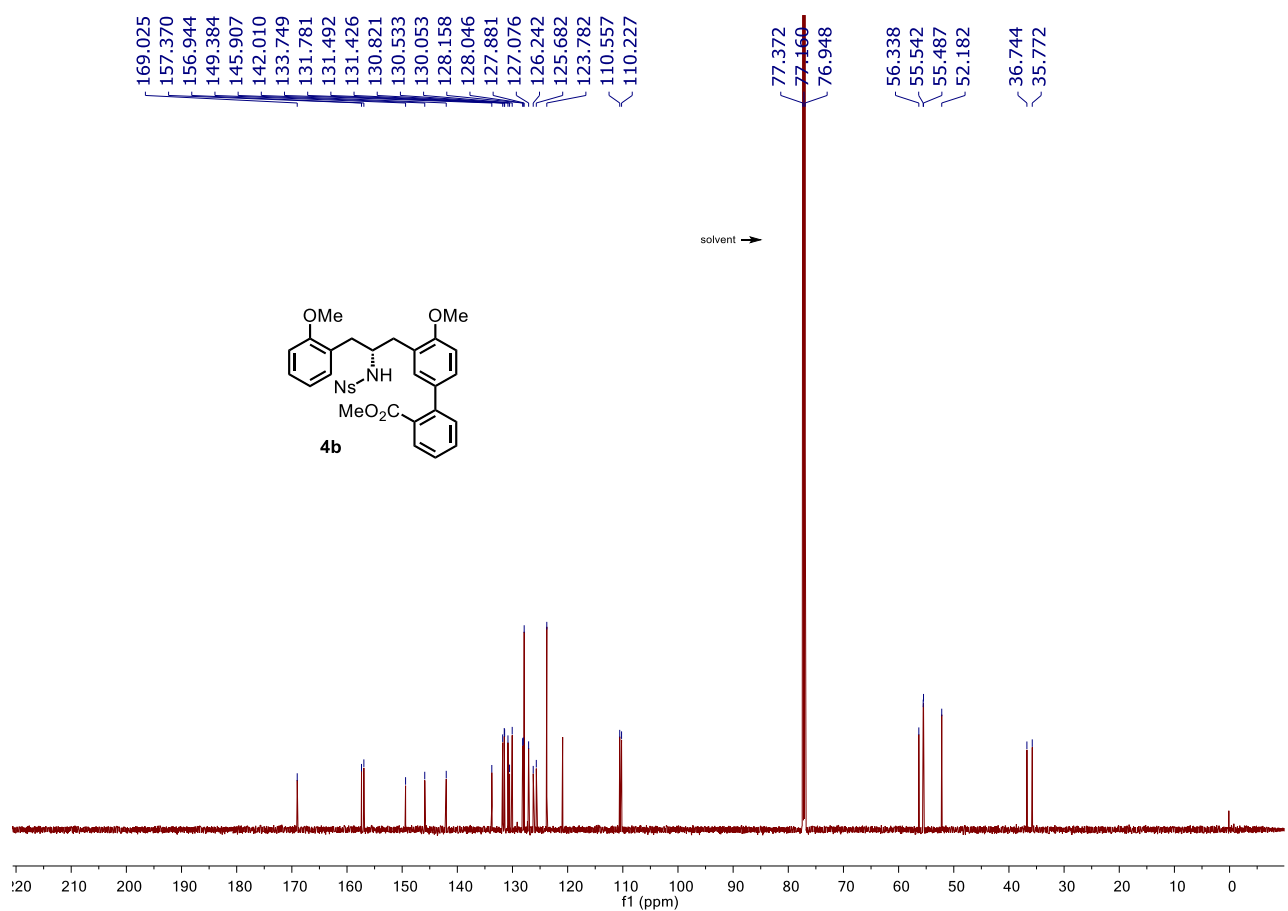

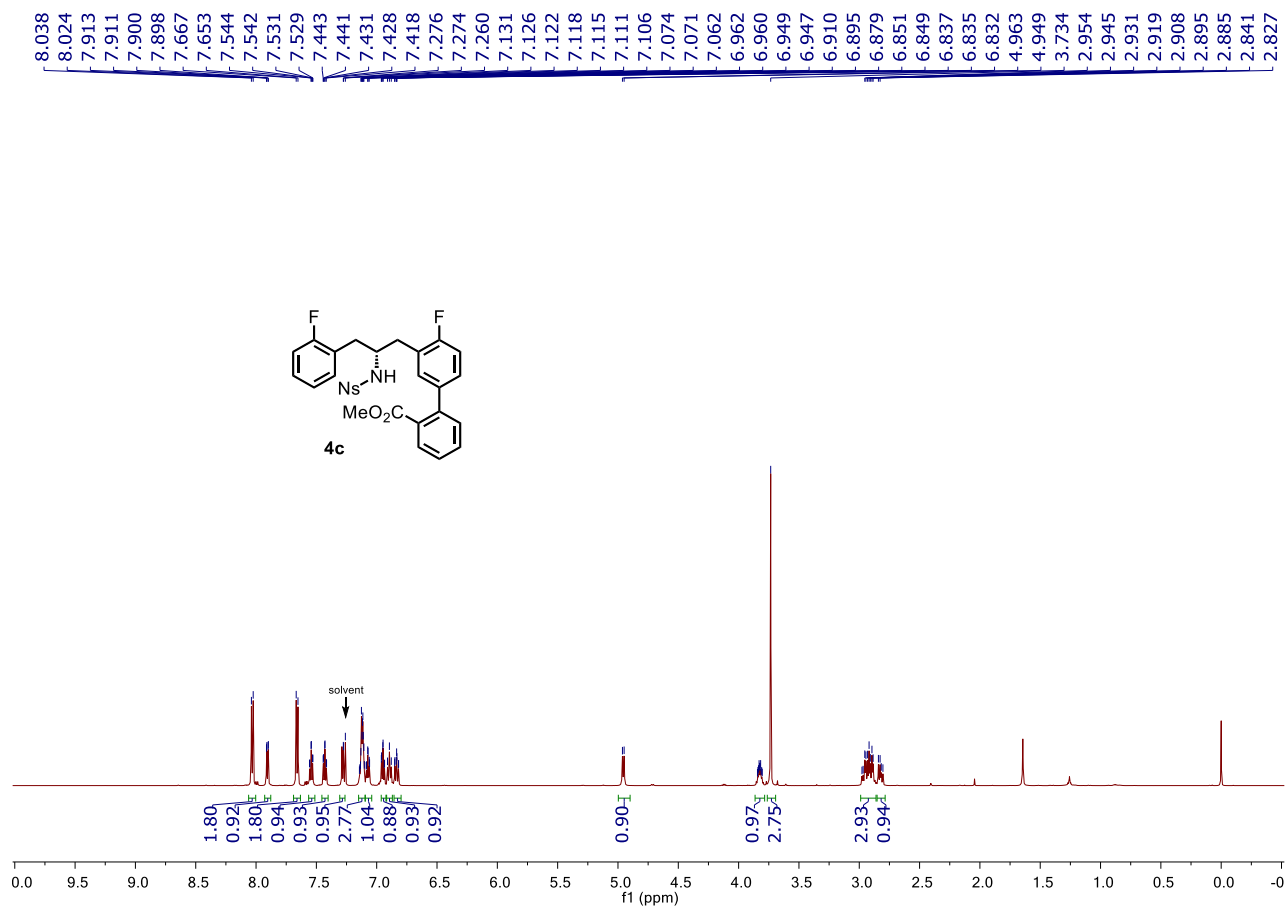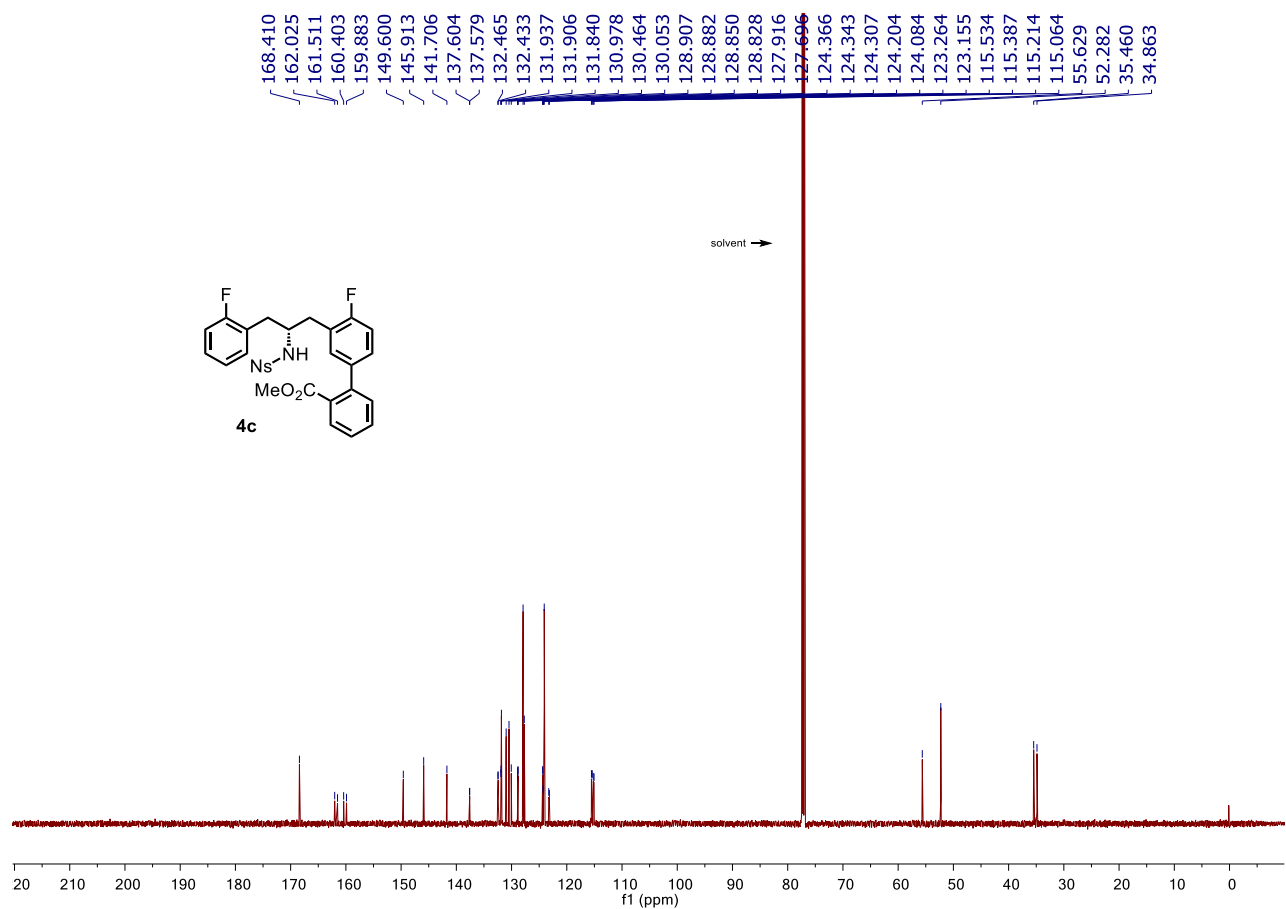



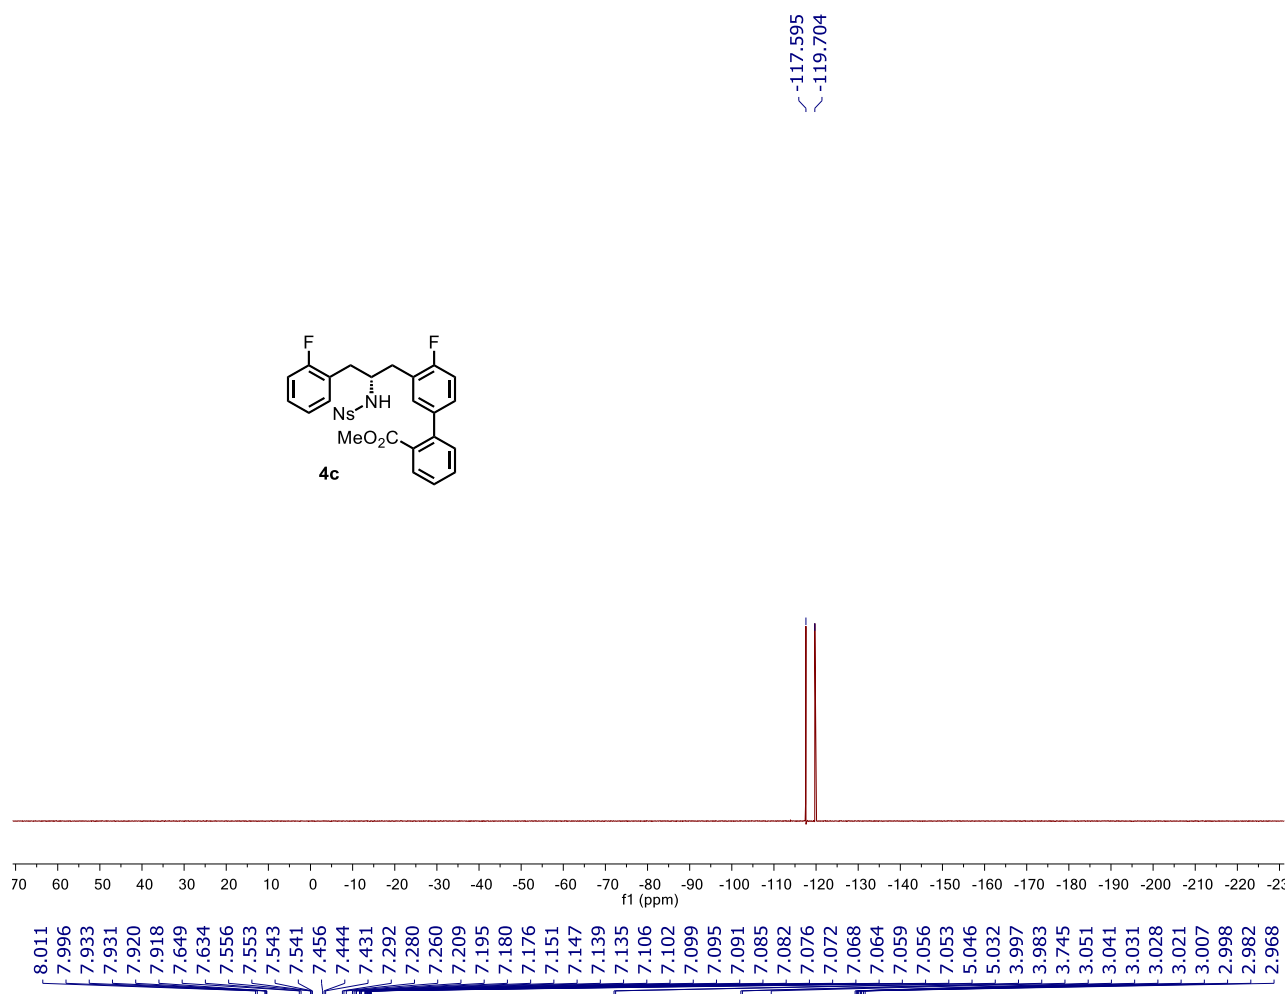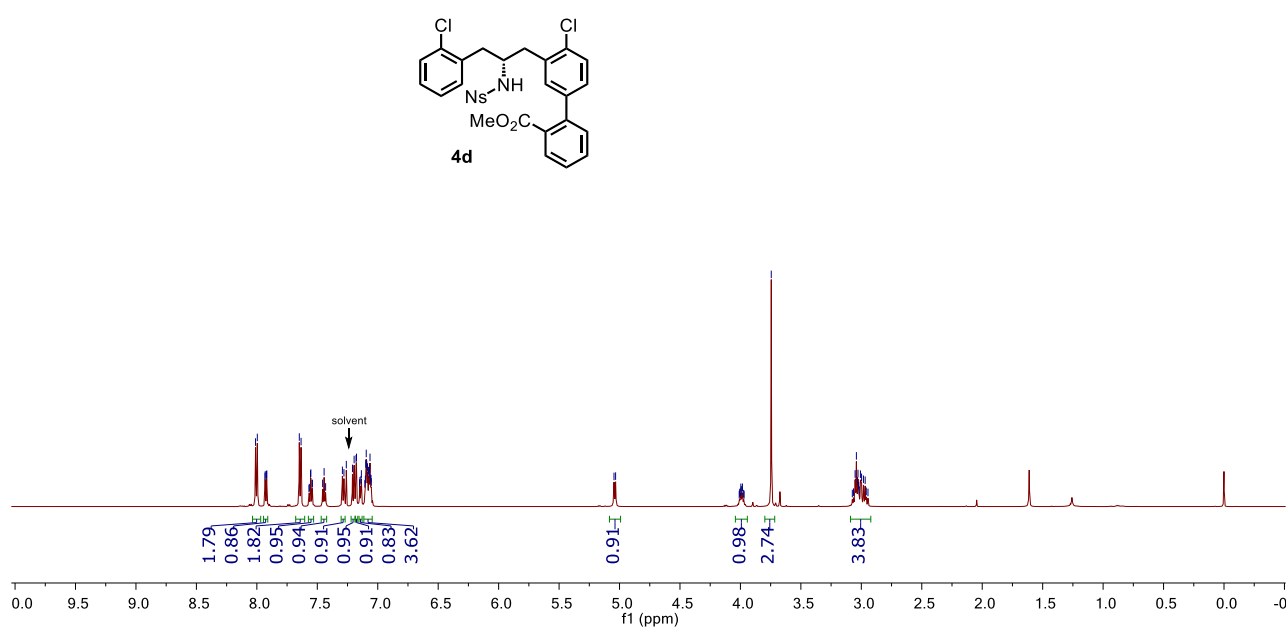



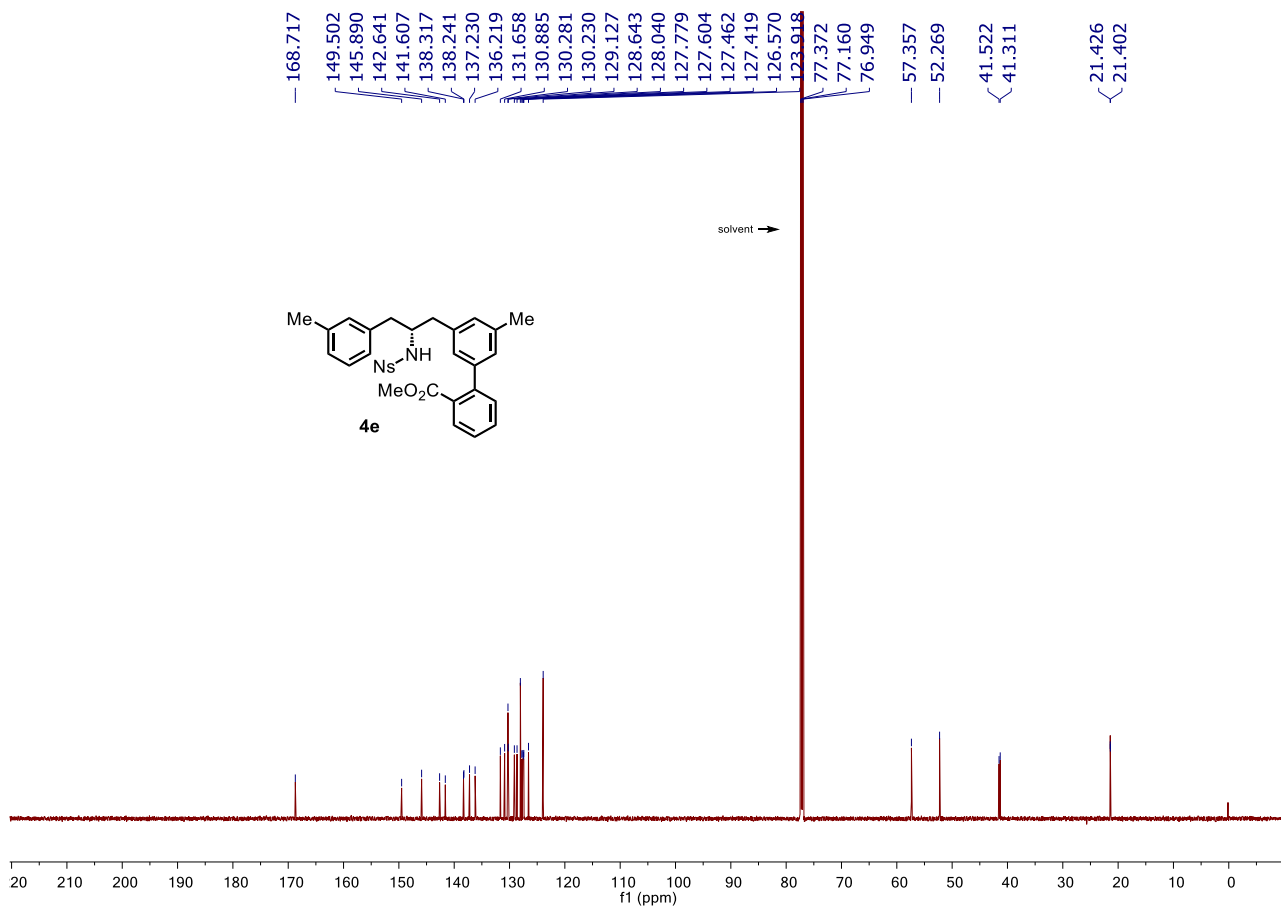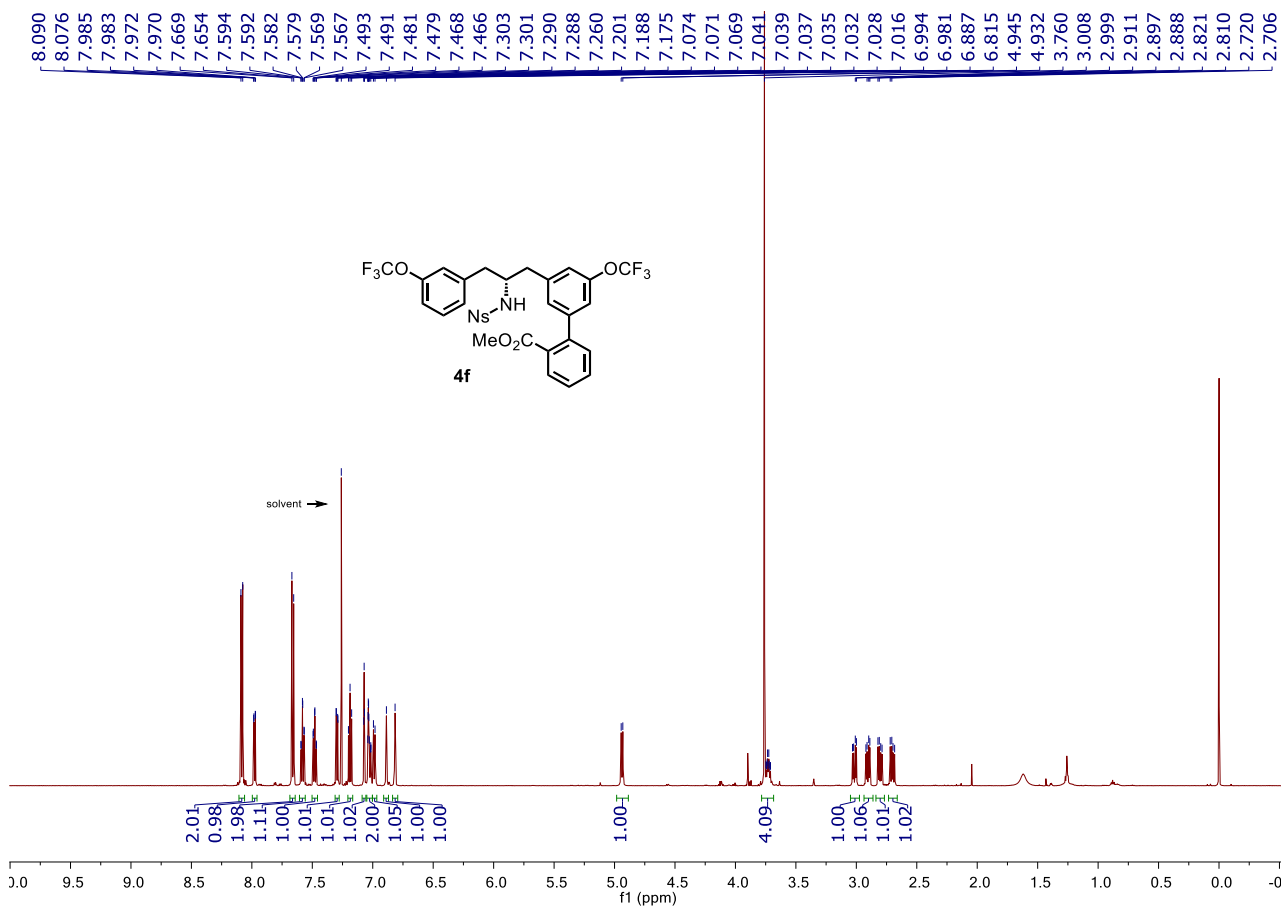

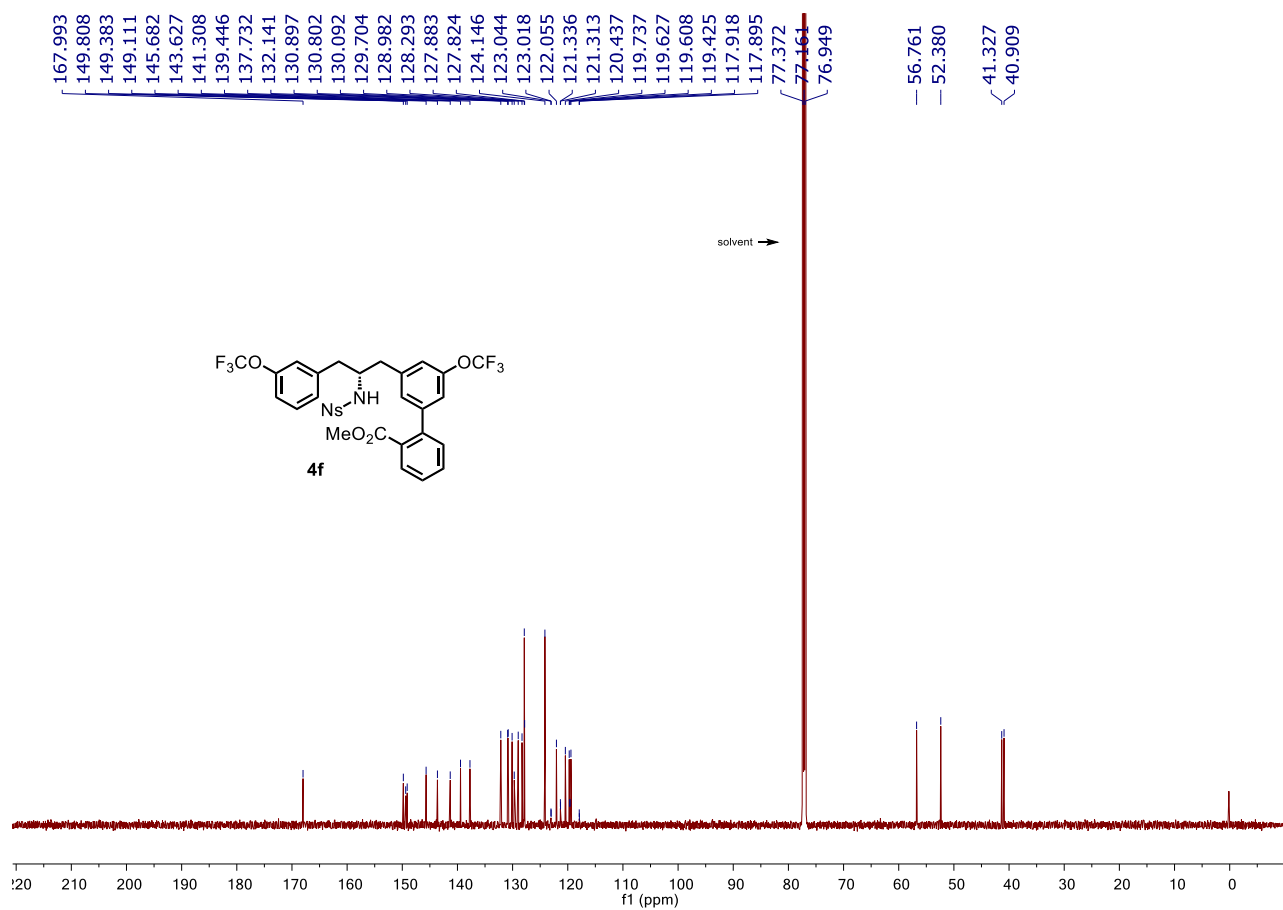

-58.070  
-58.102

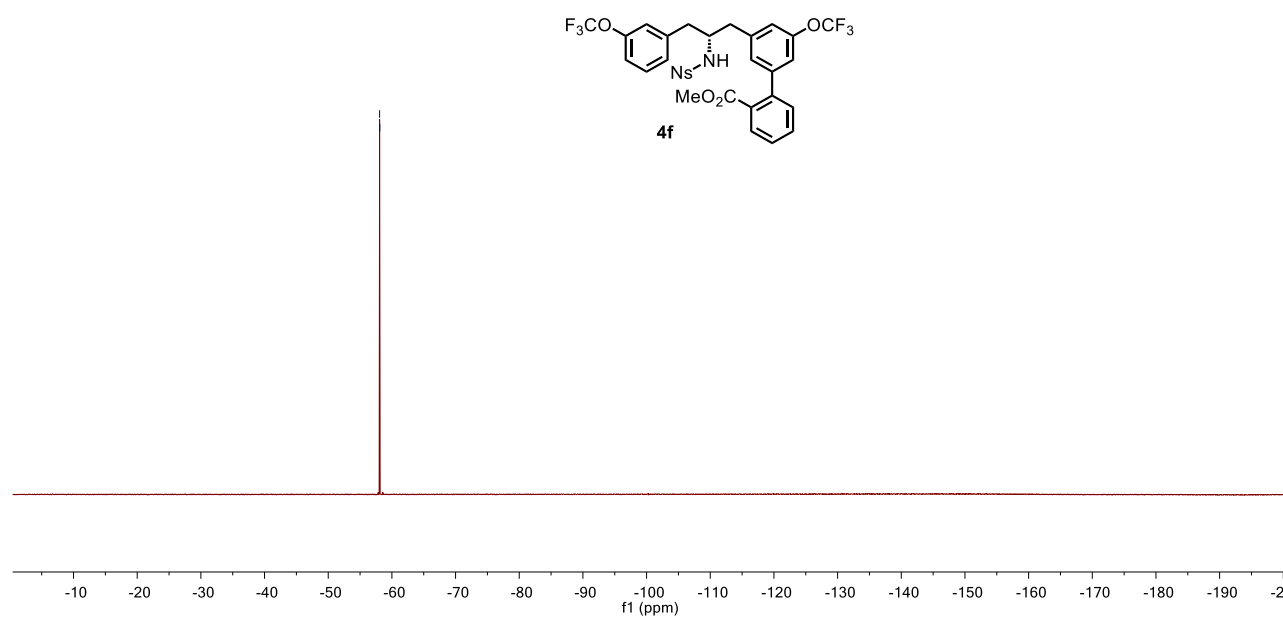

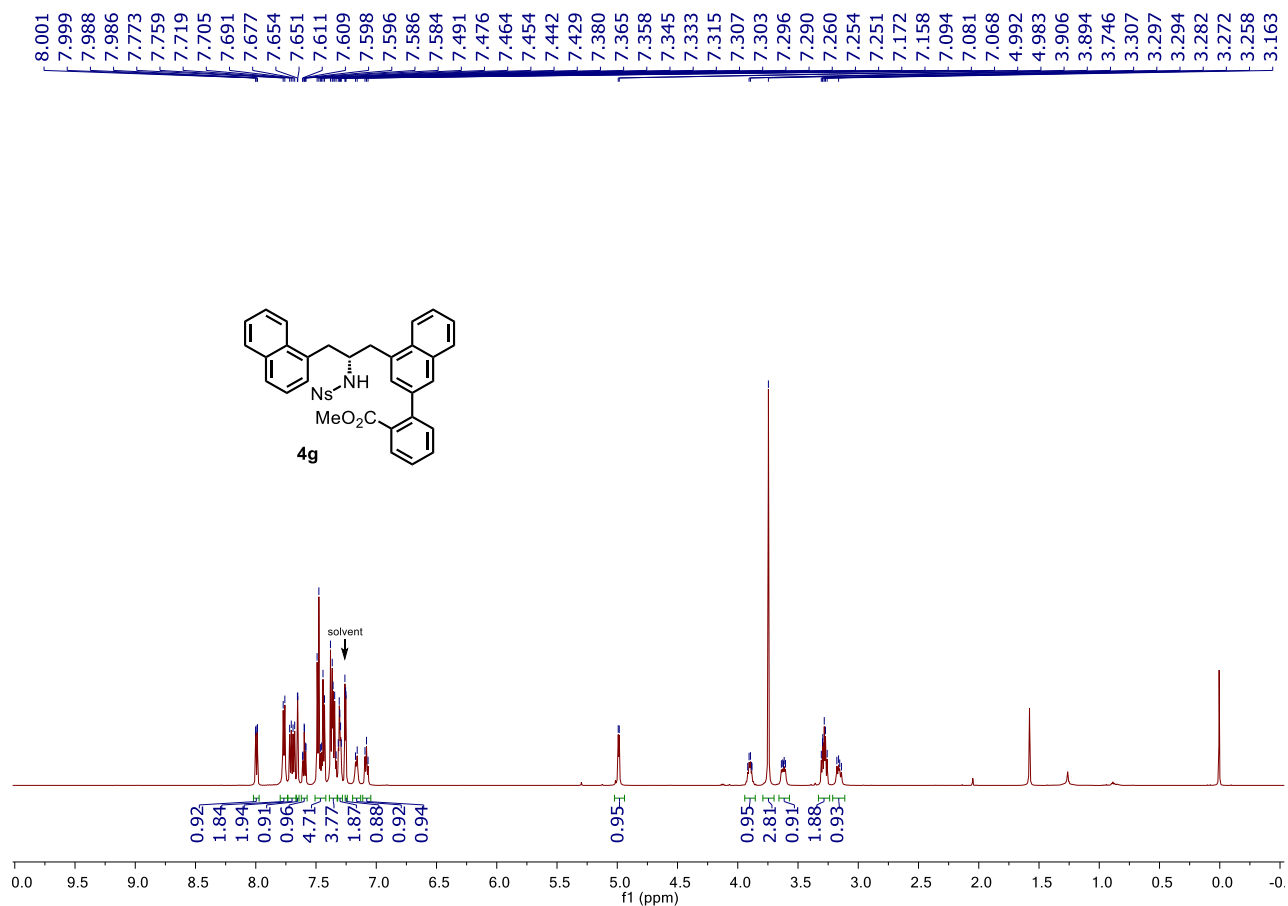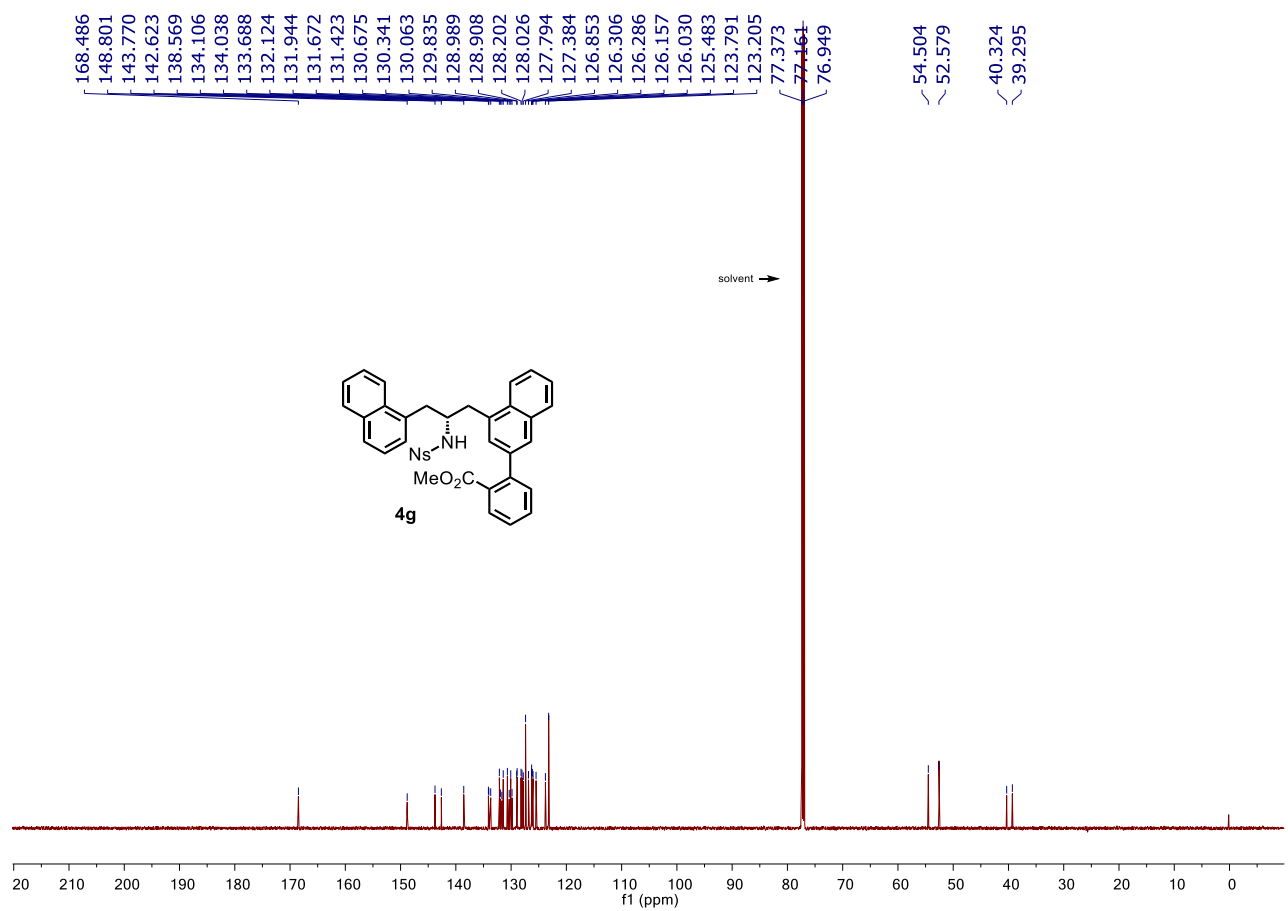

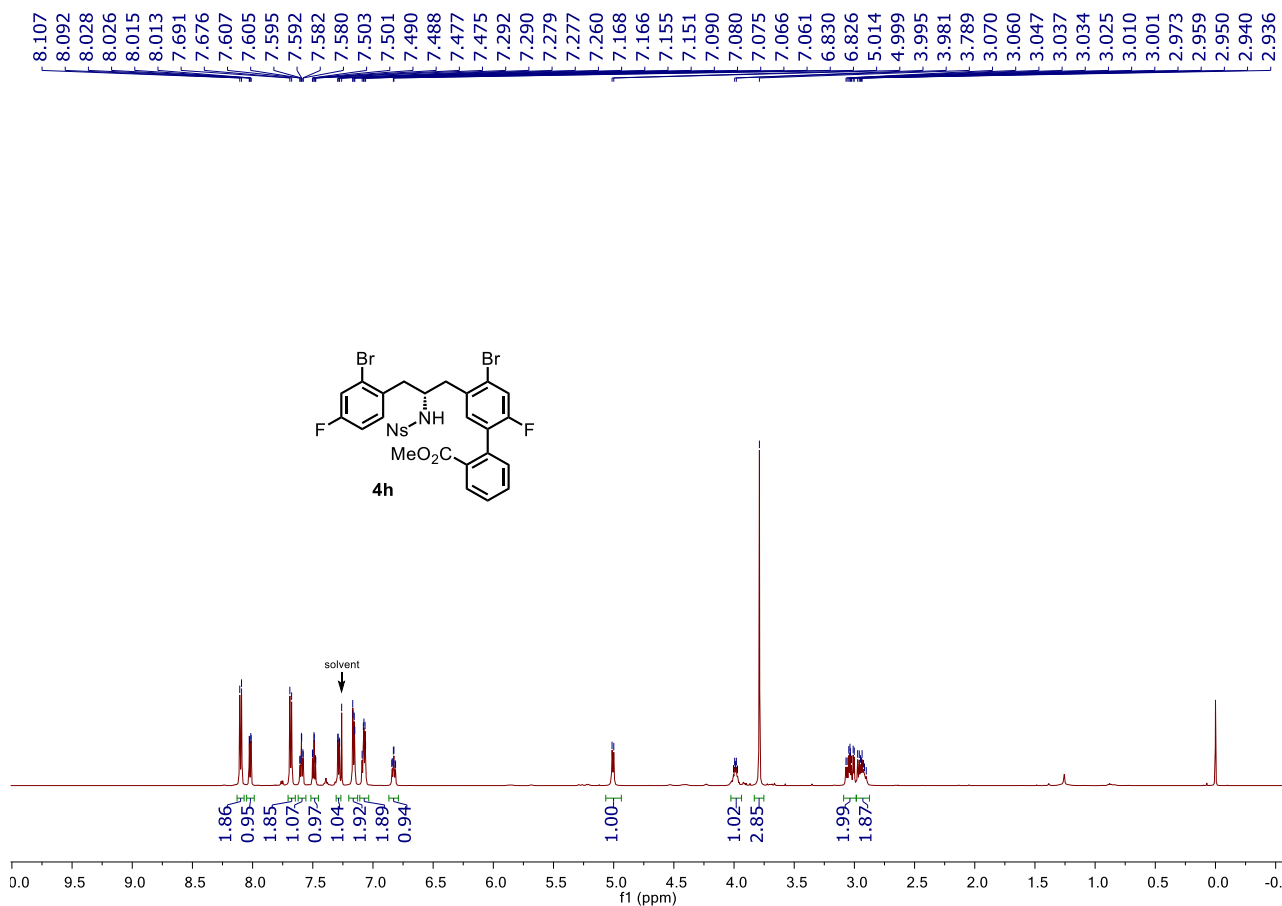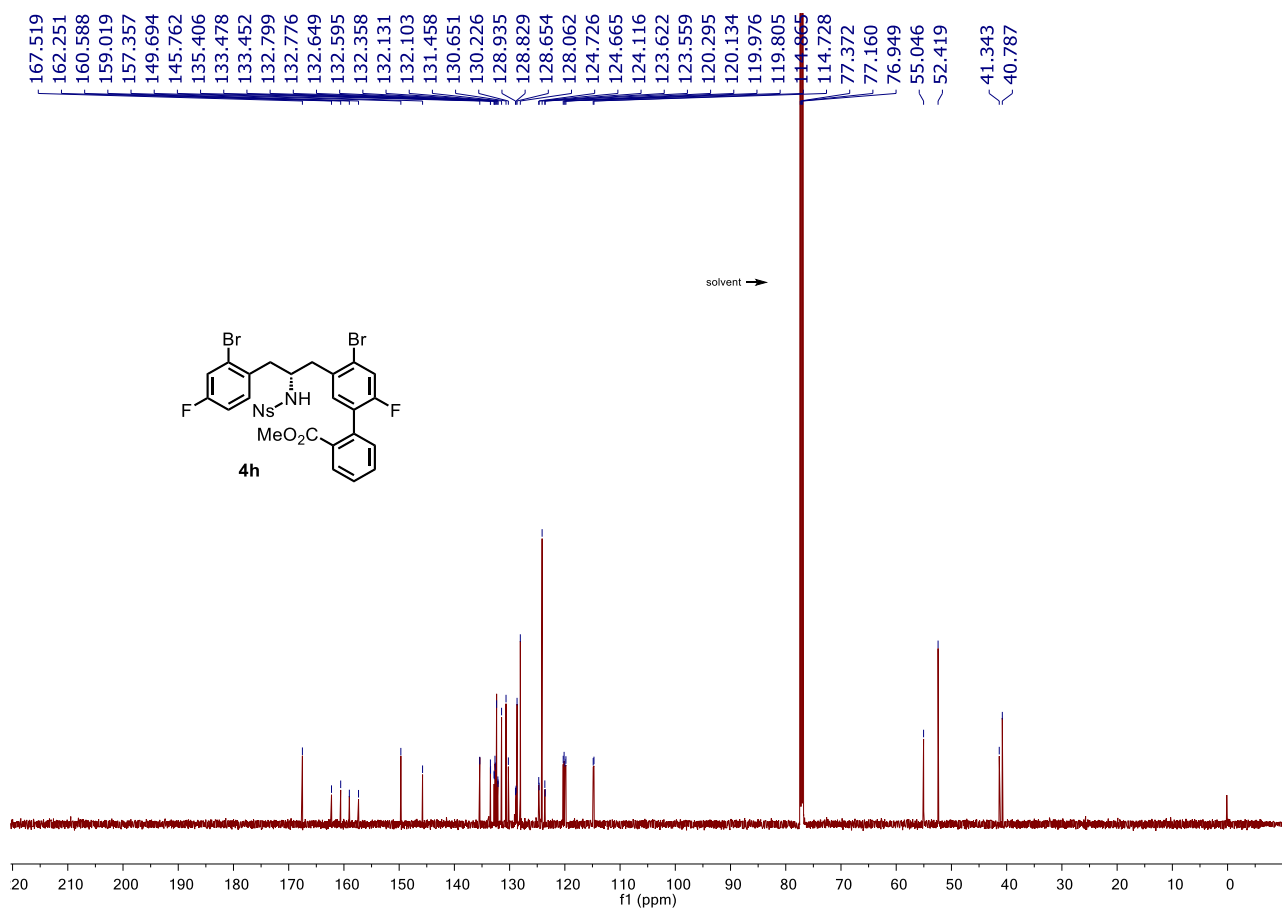

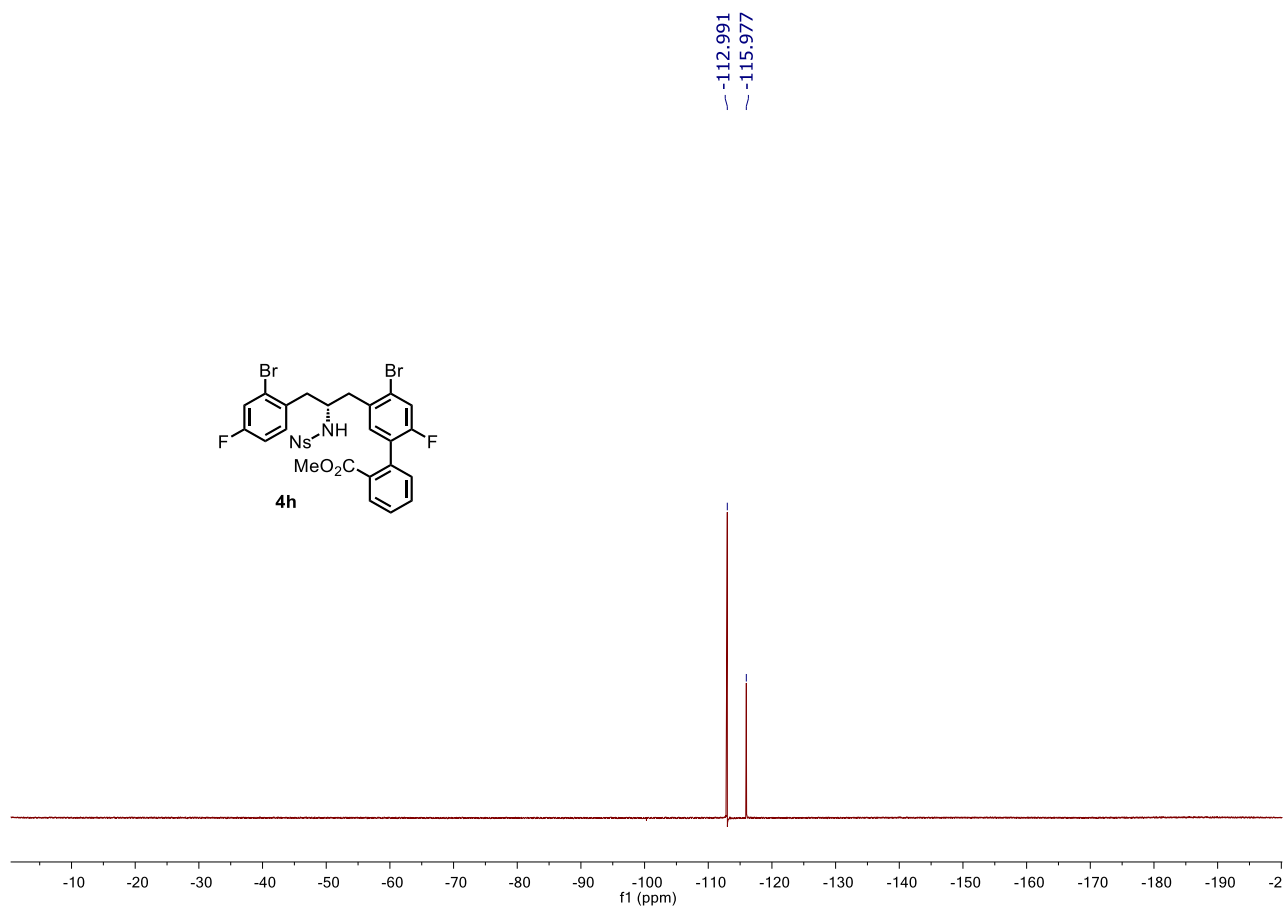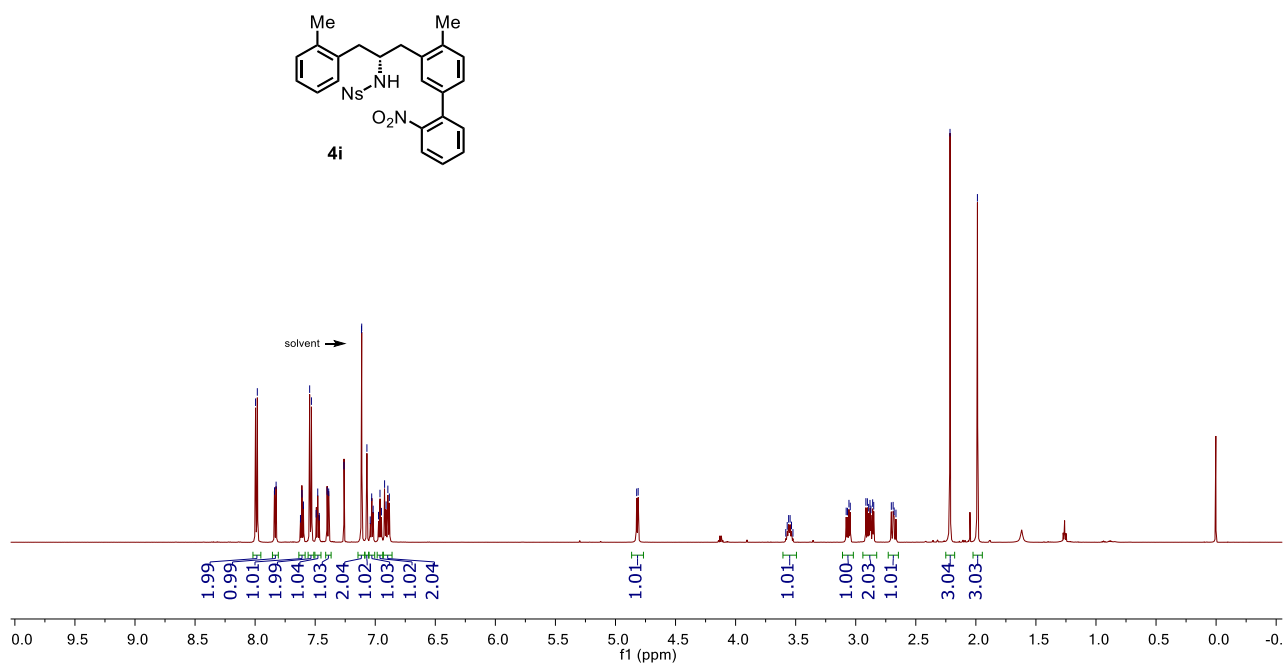

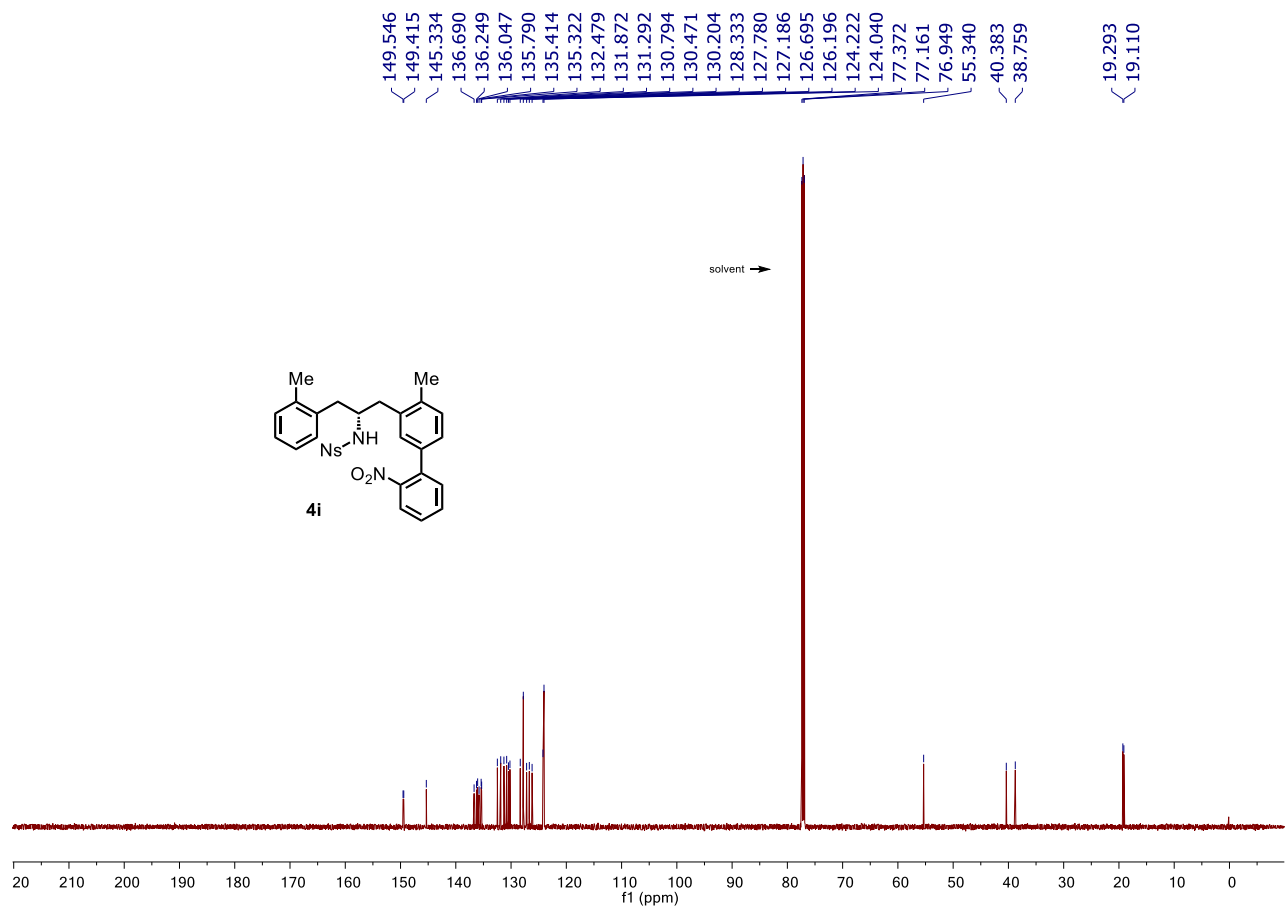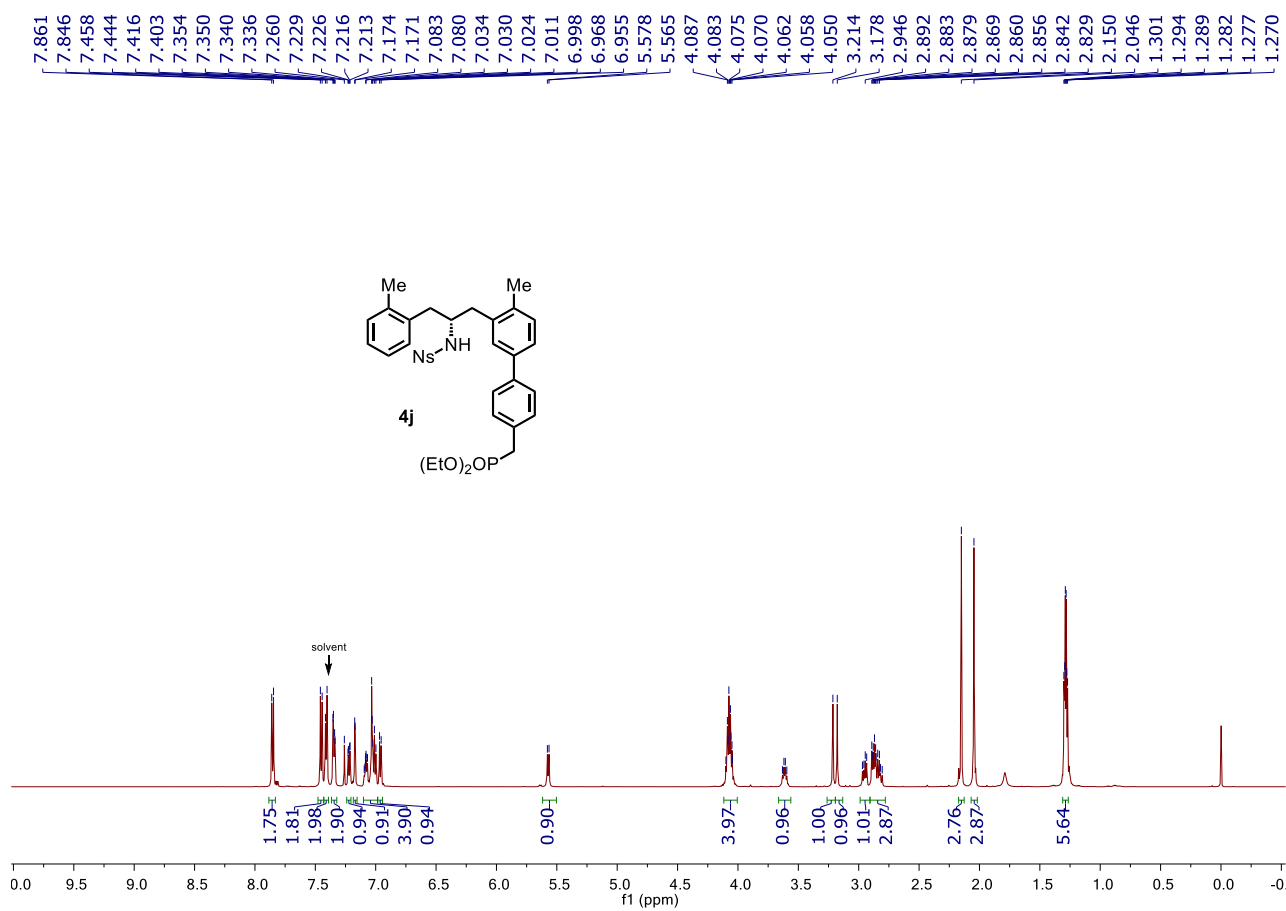



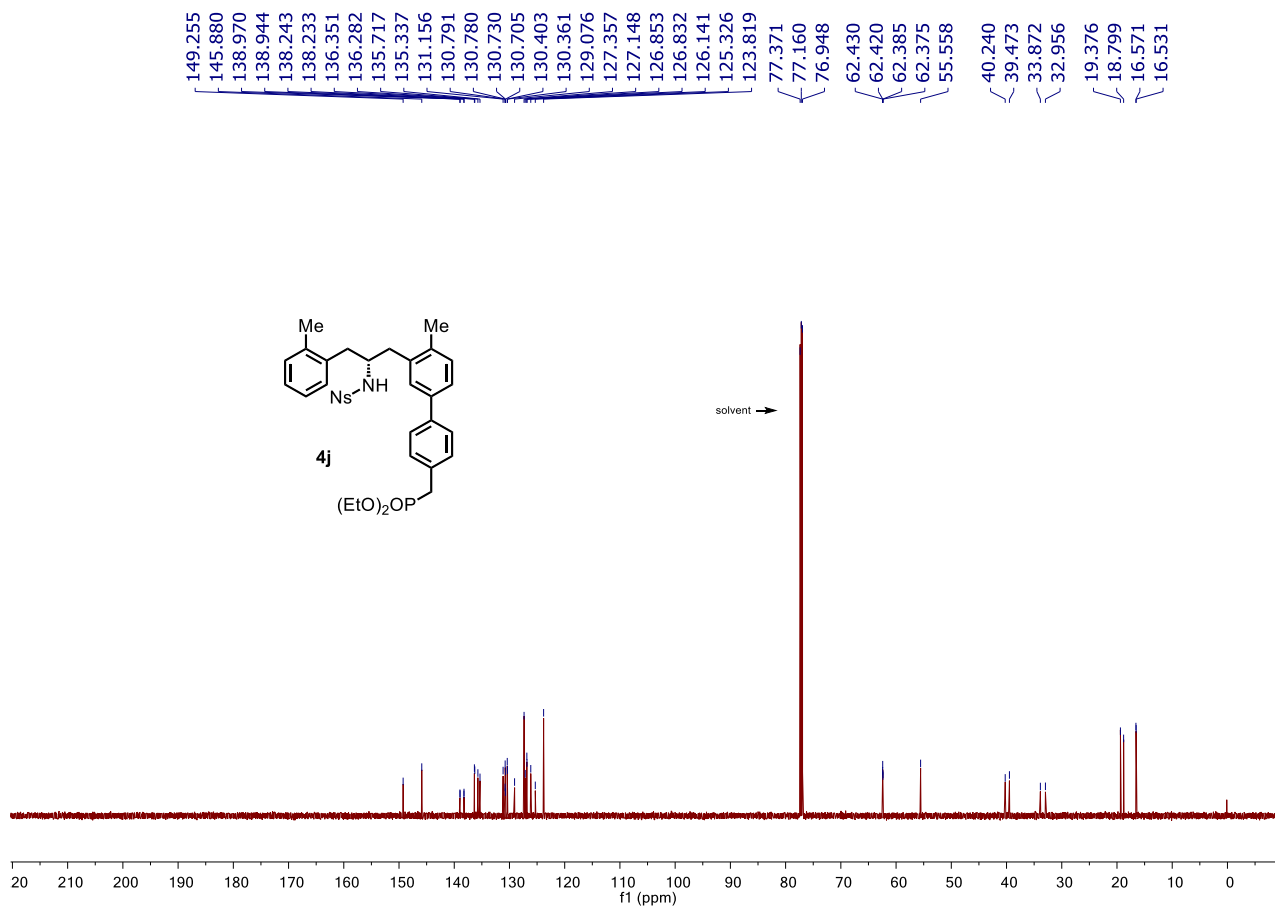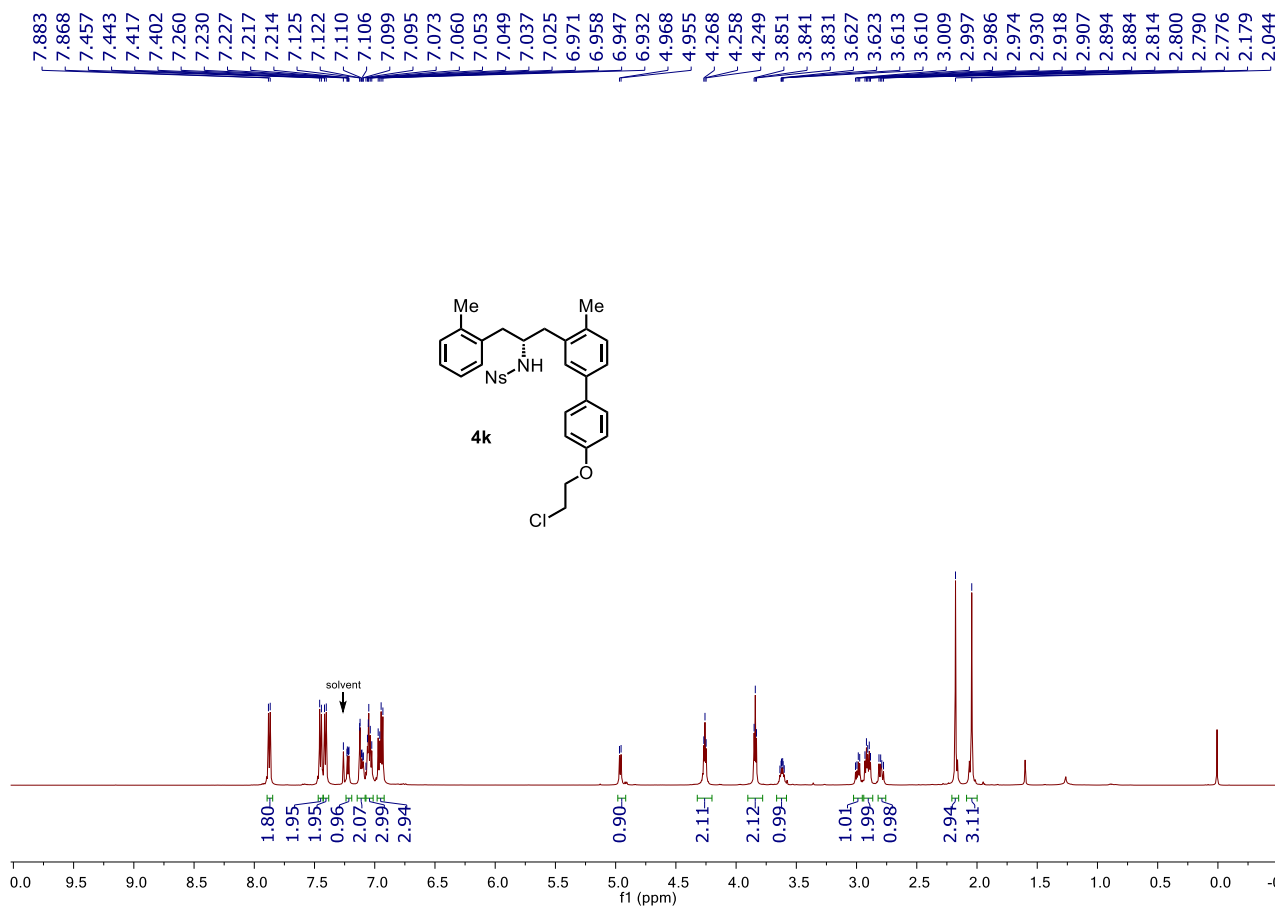

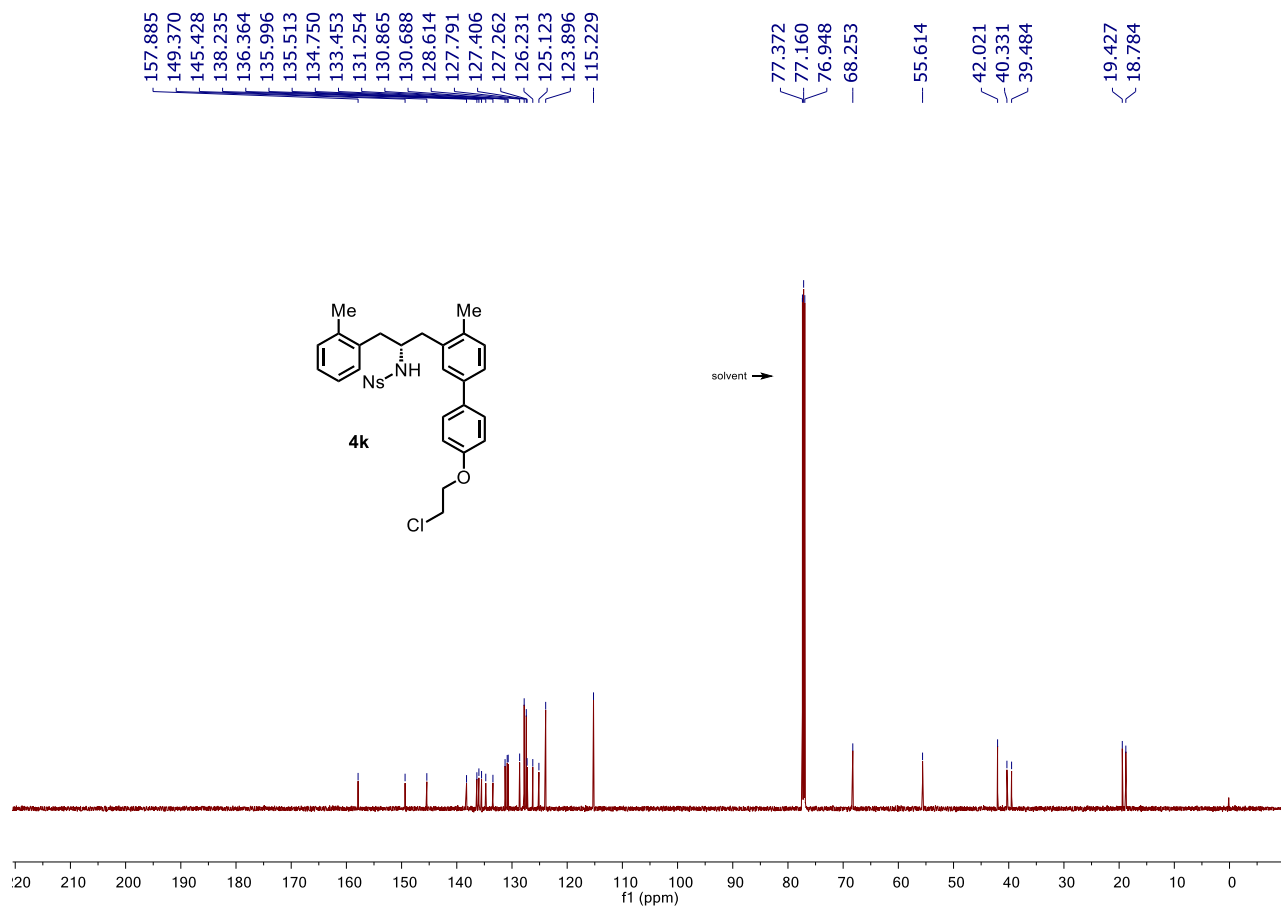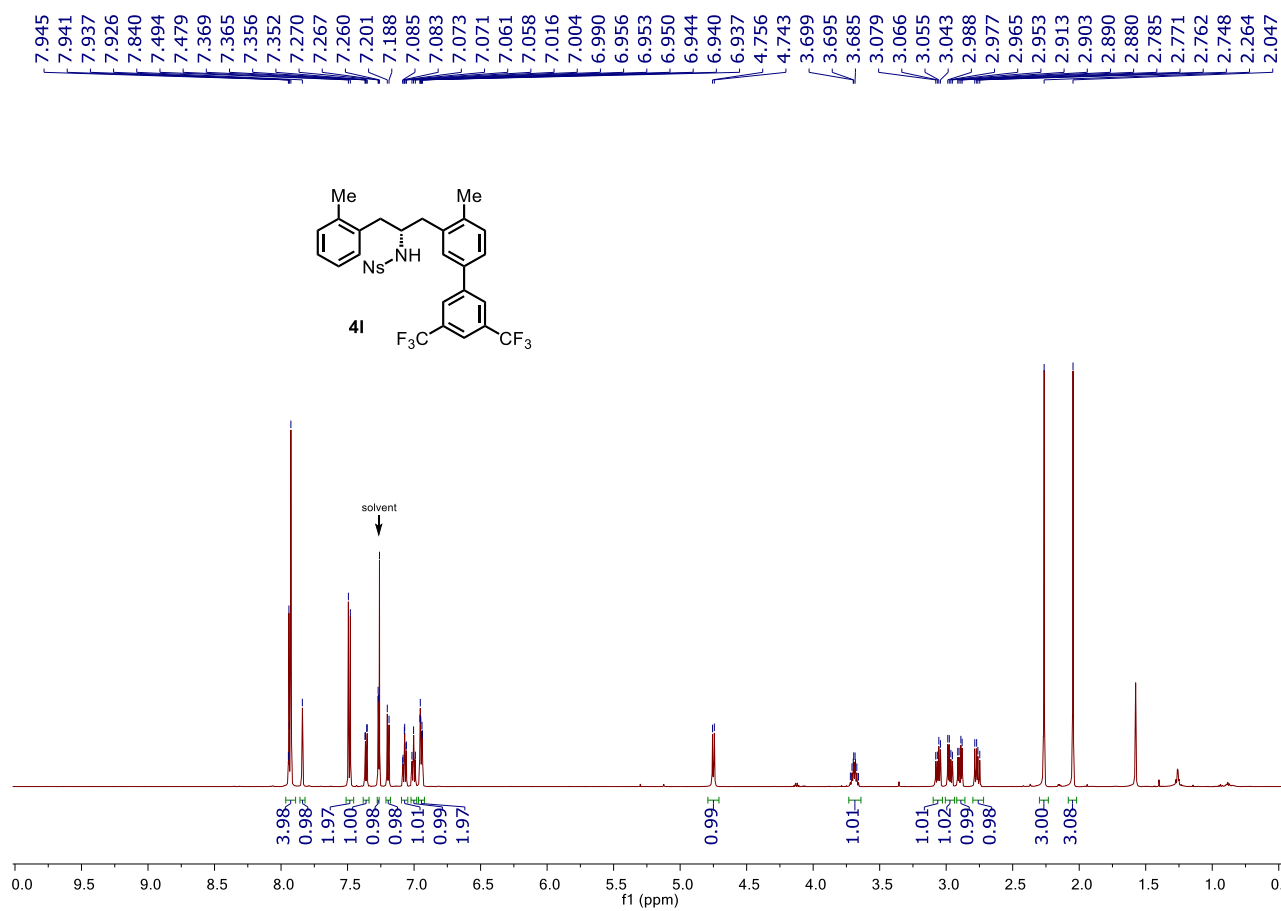

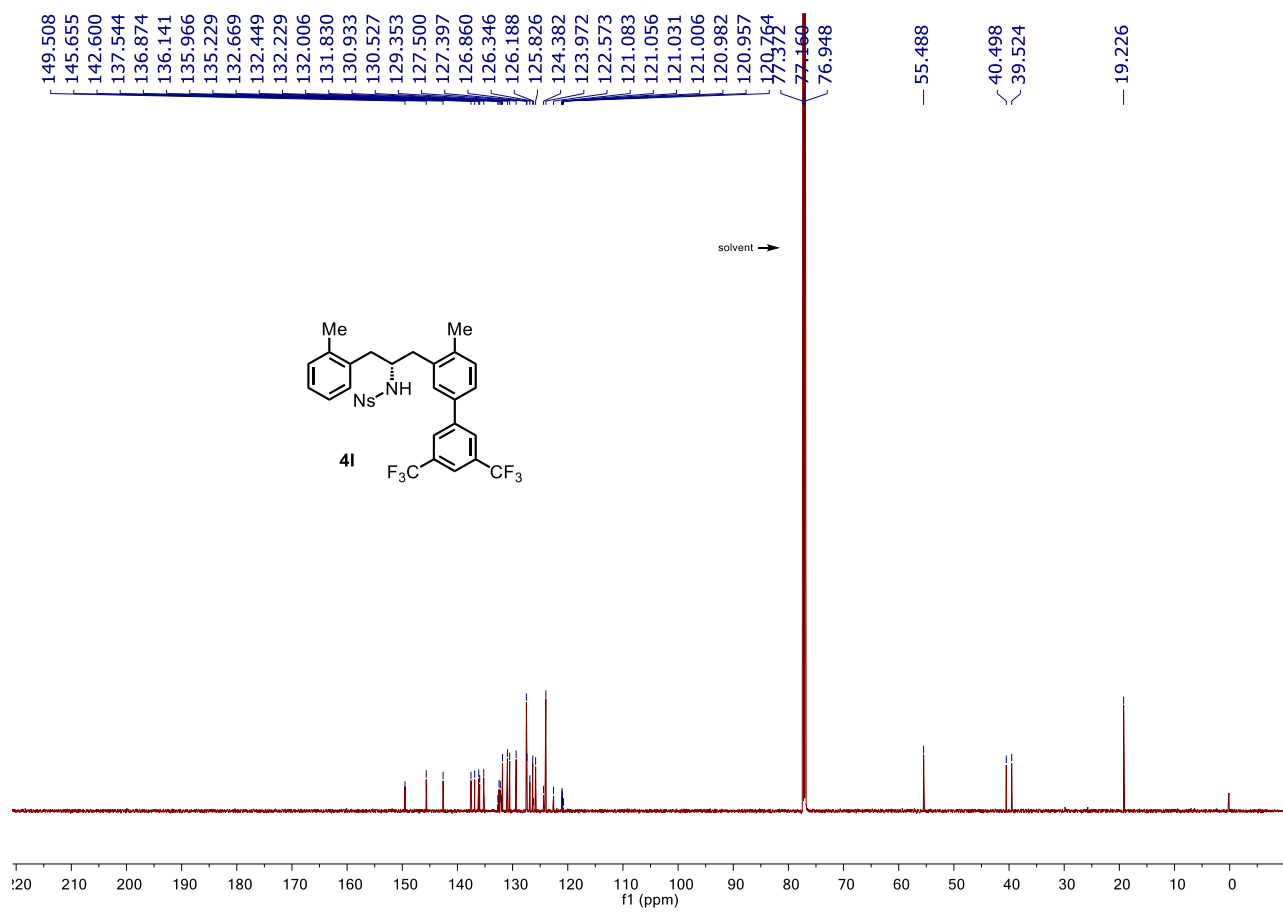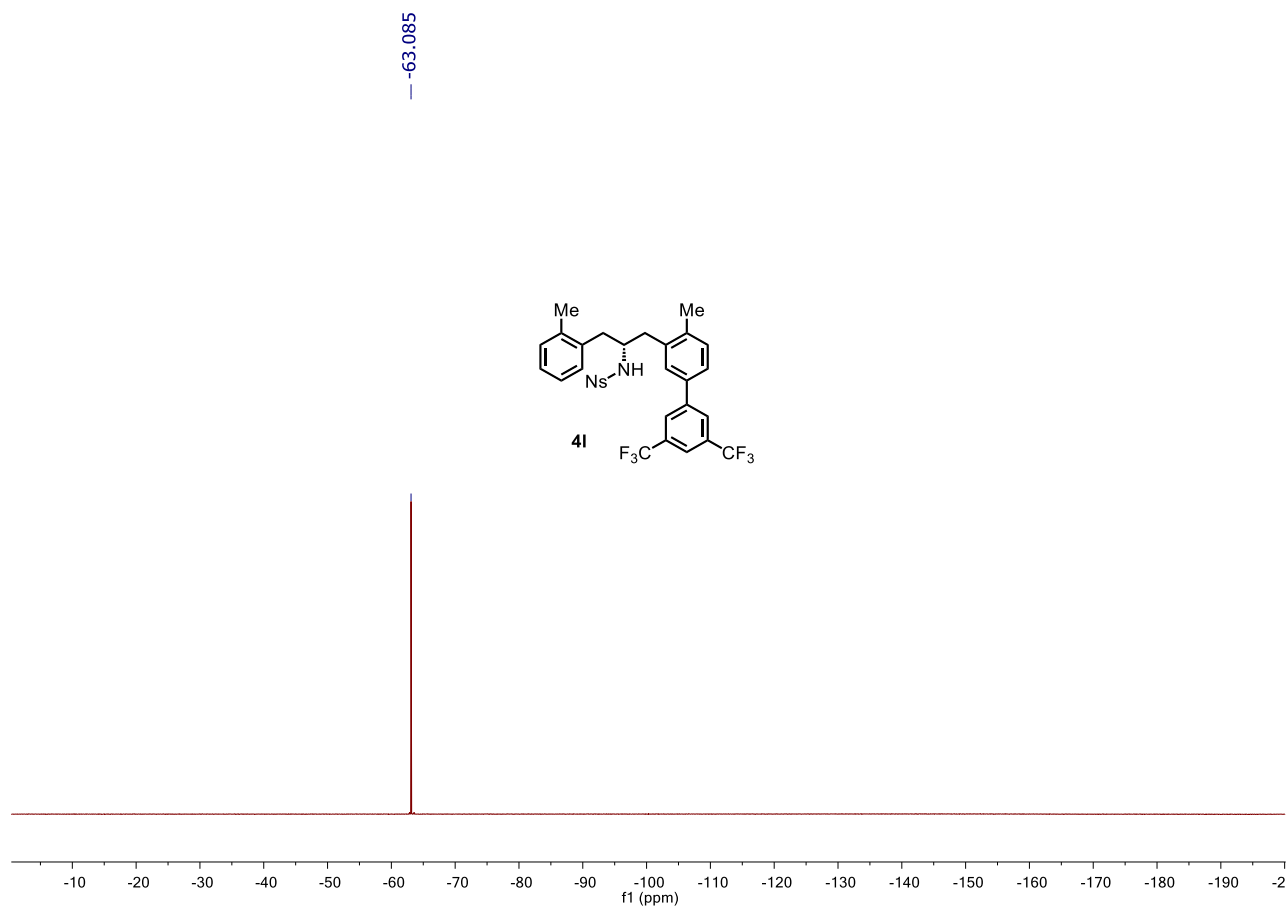

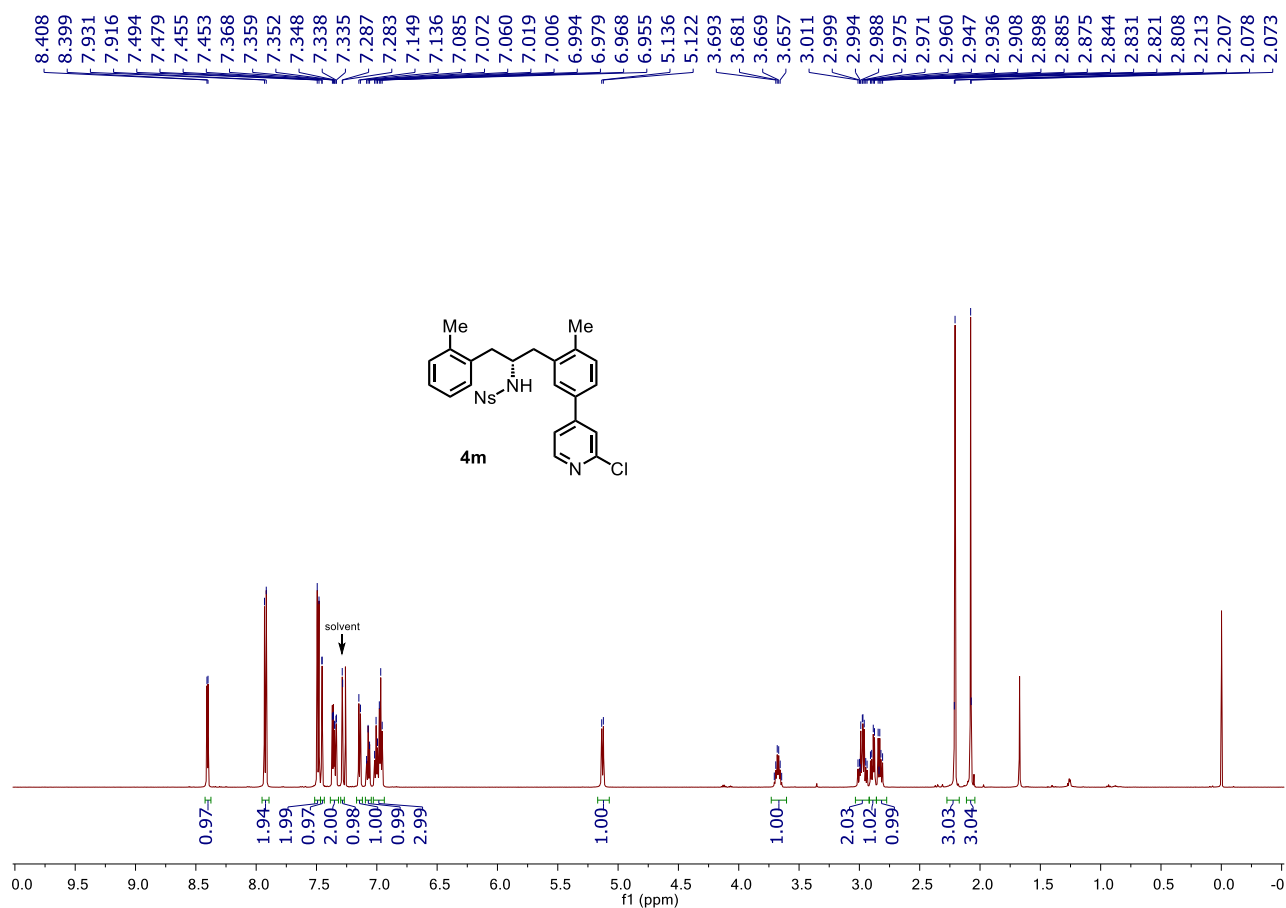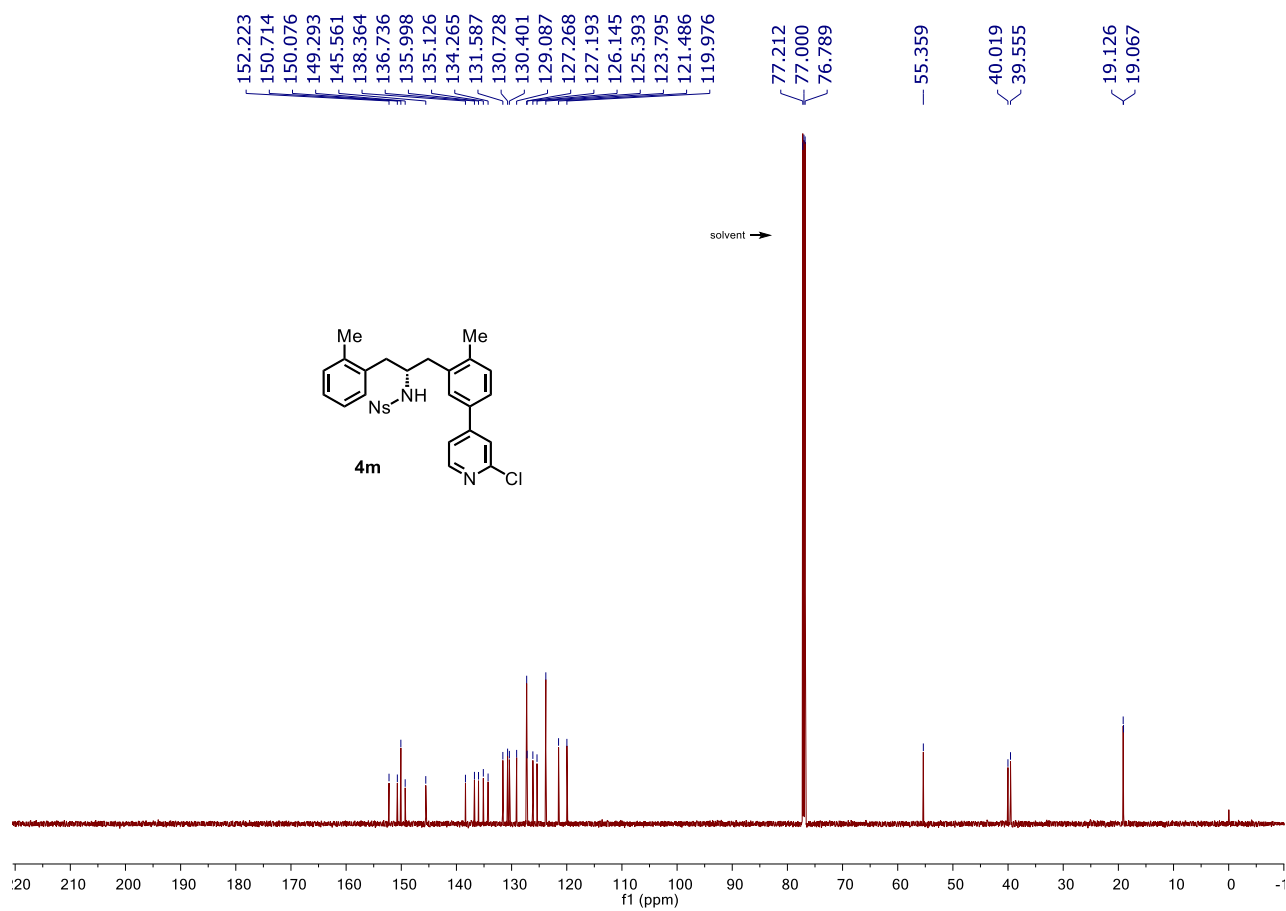

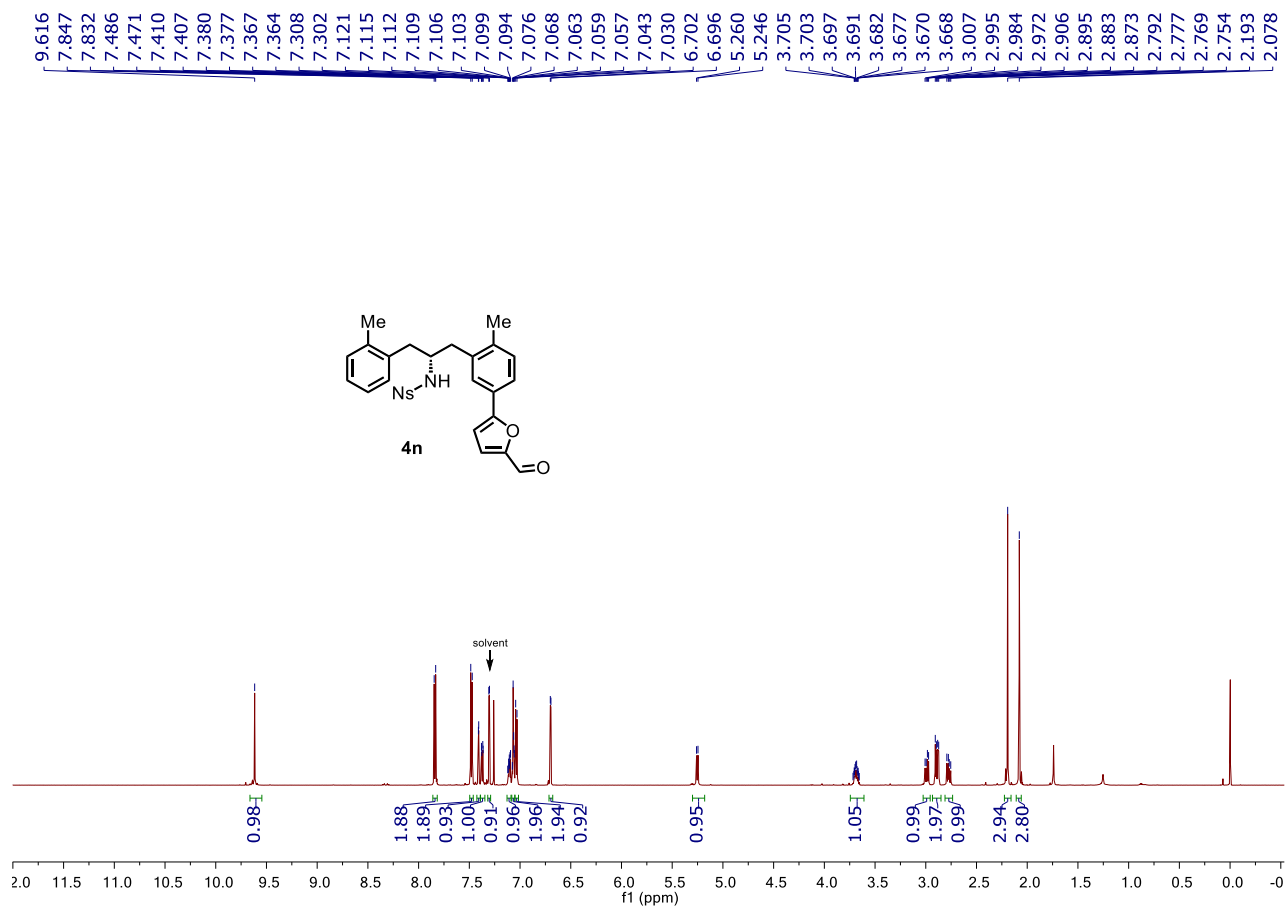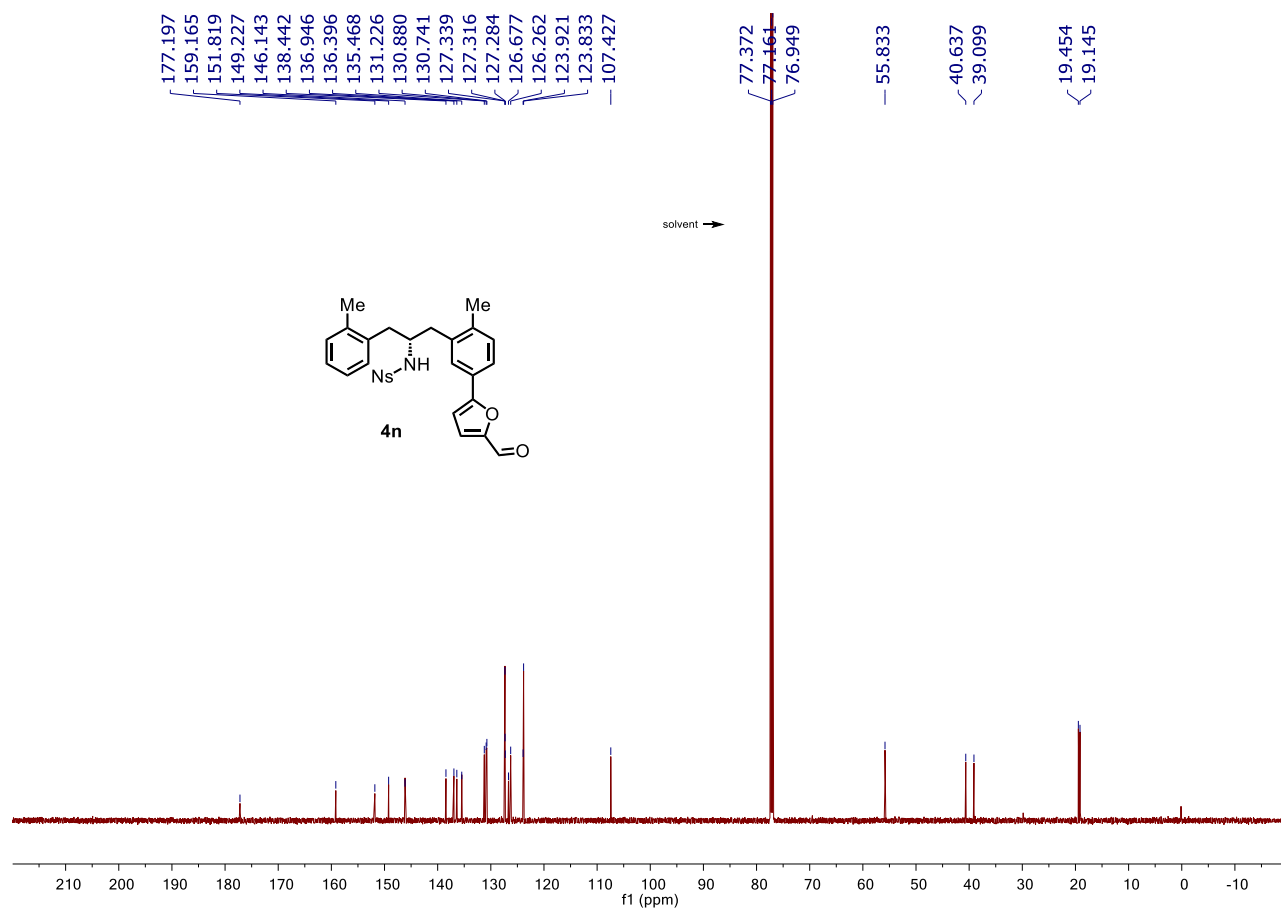

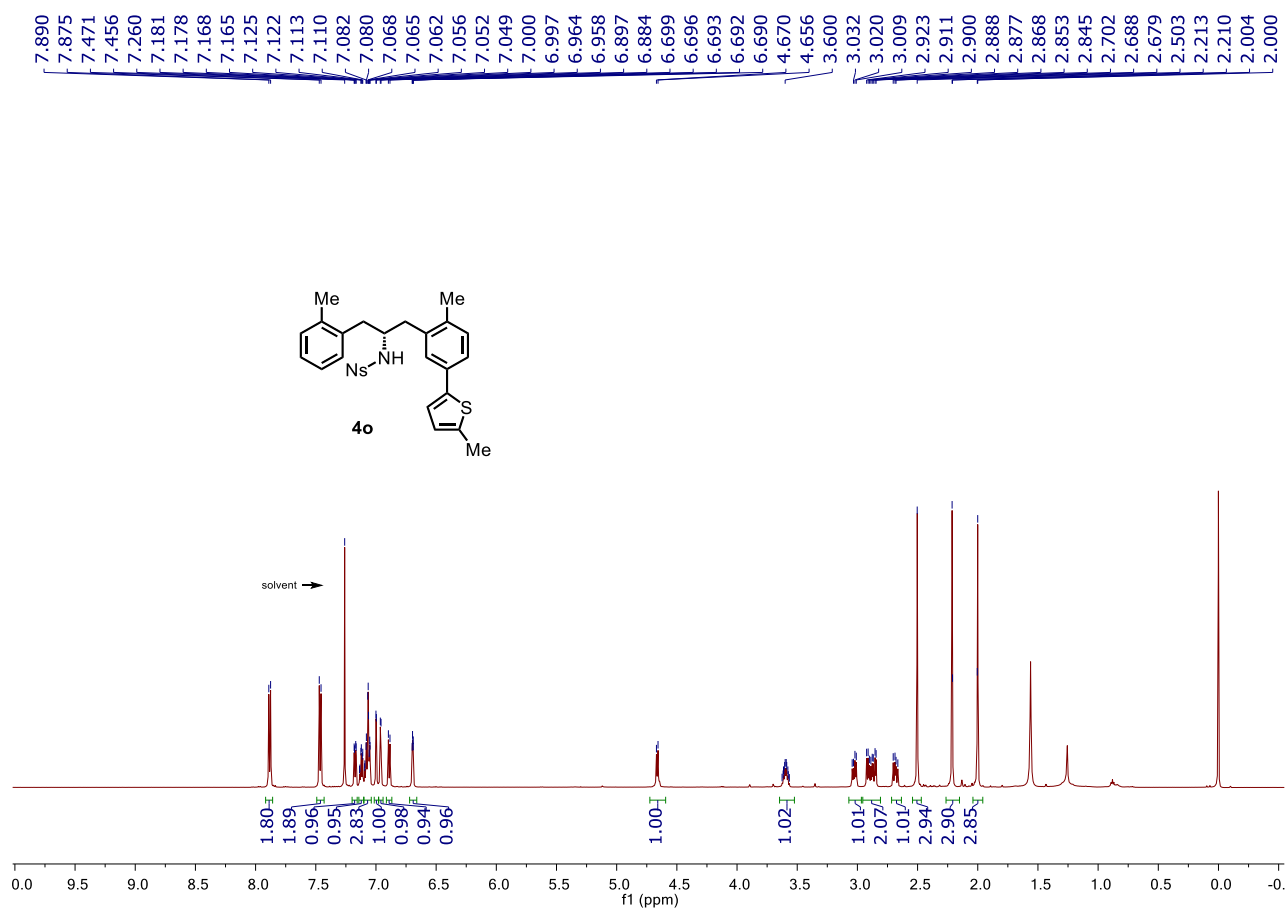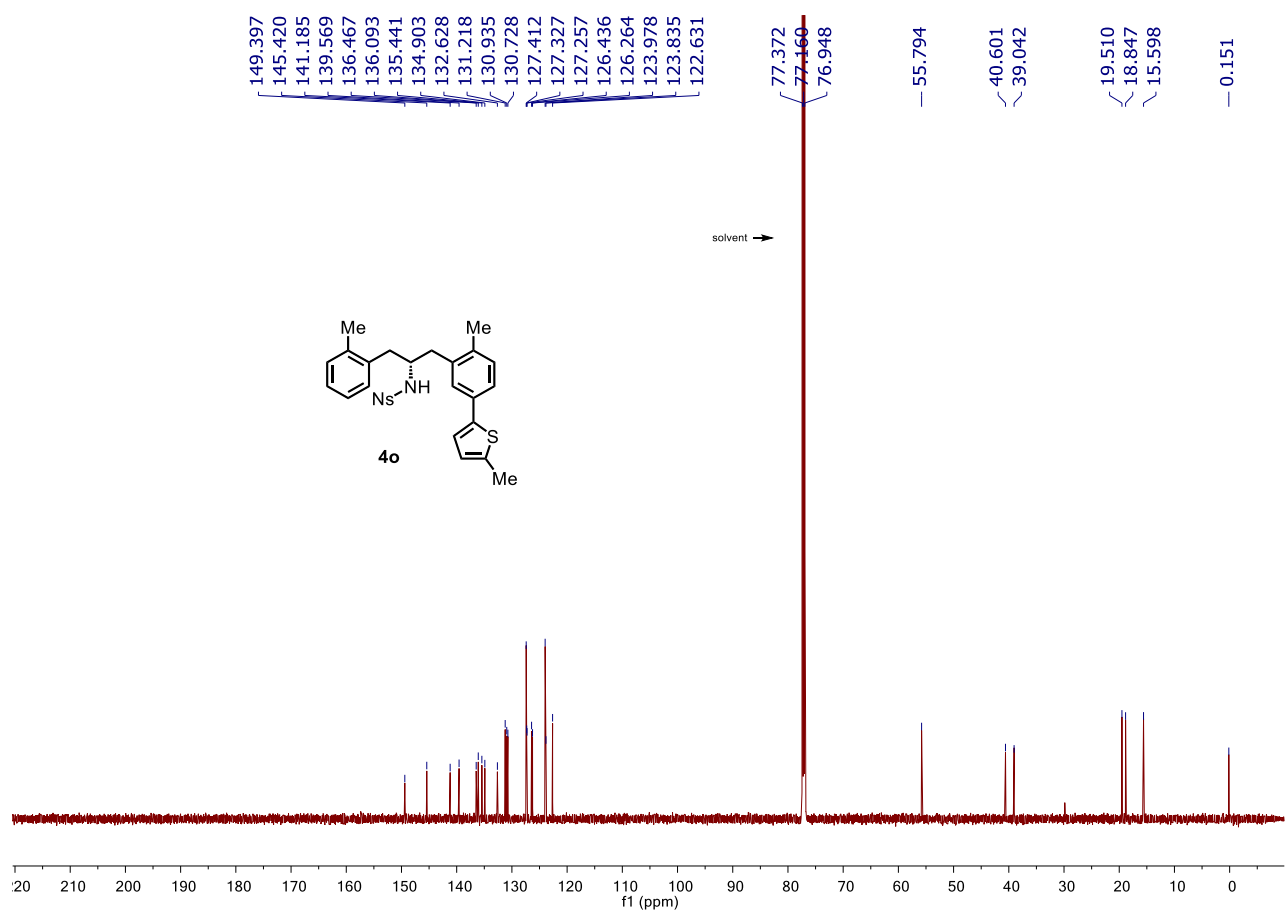

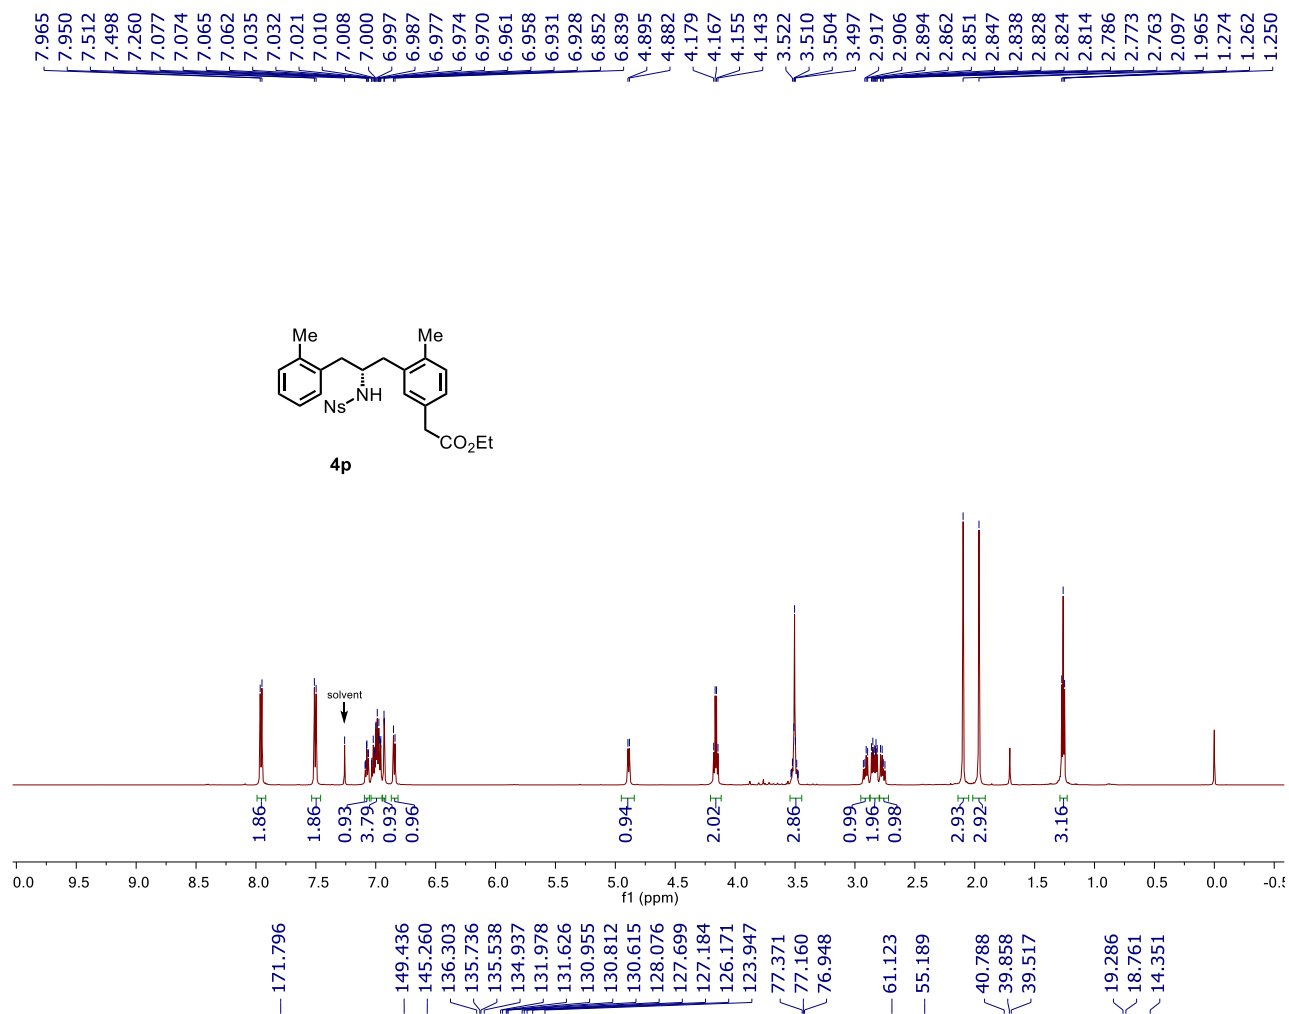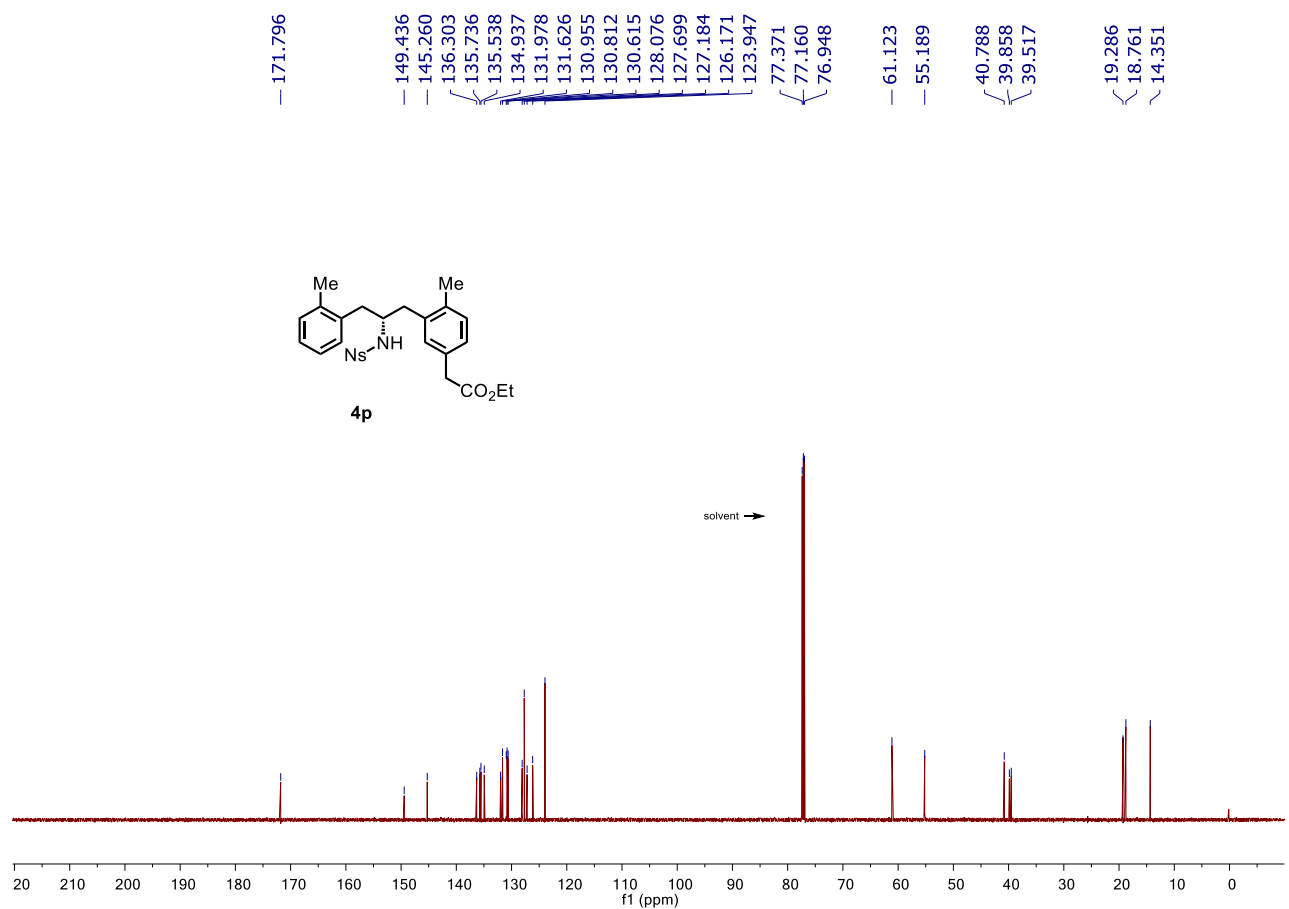

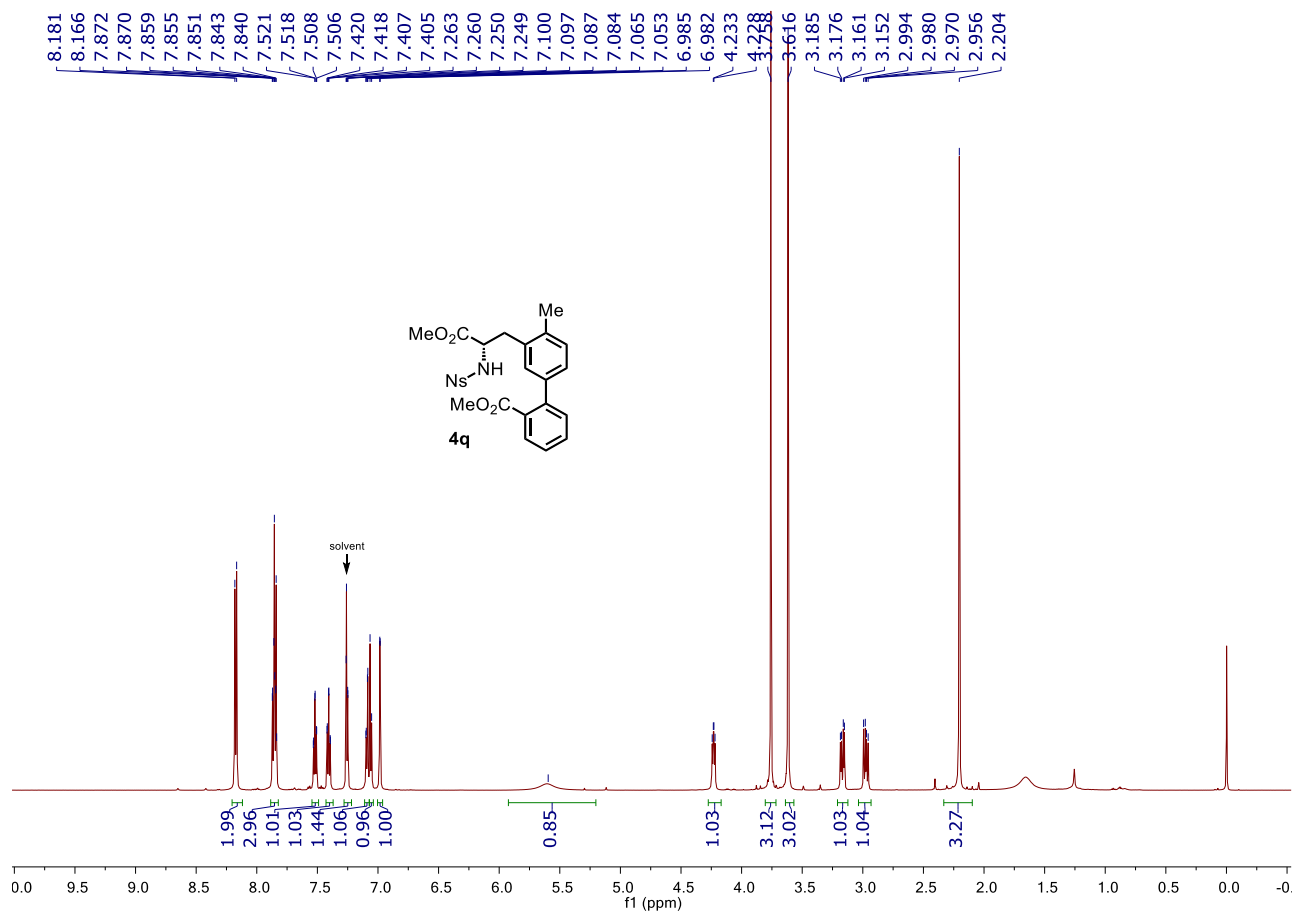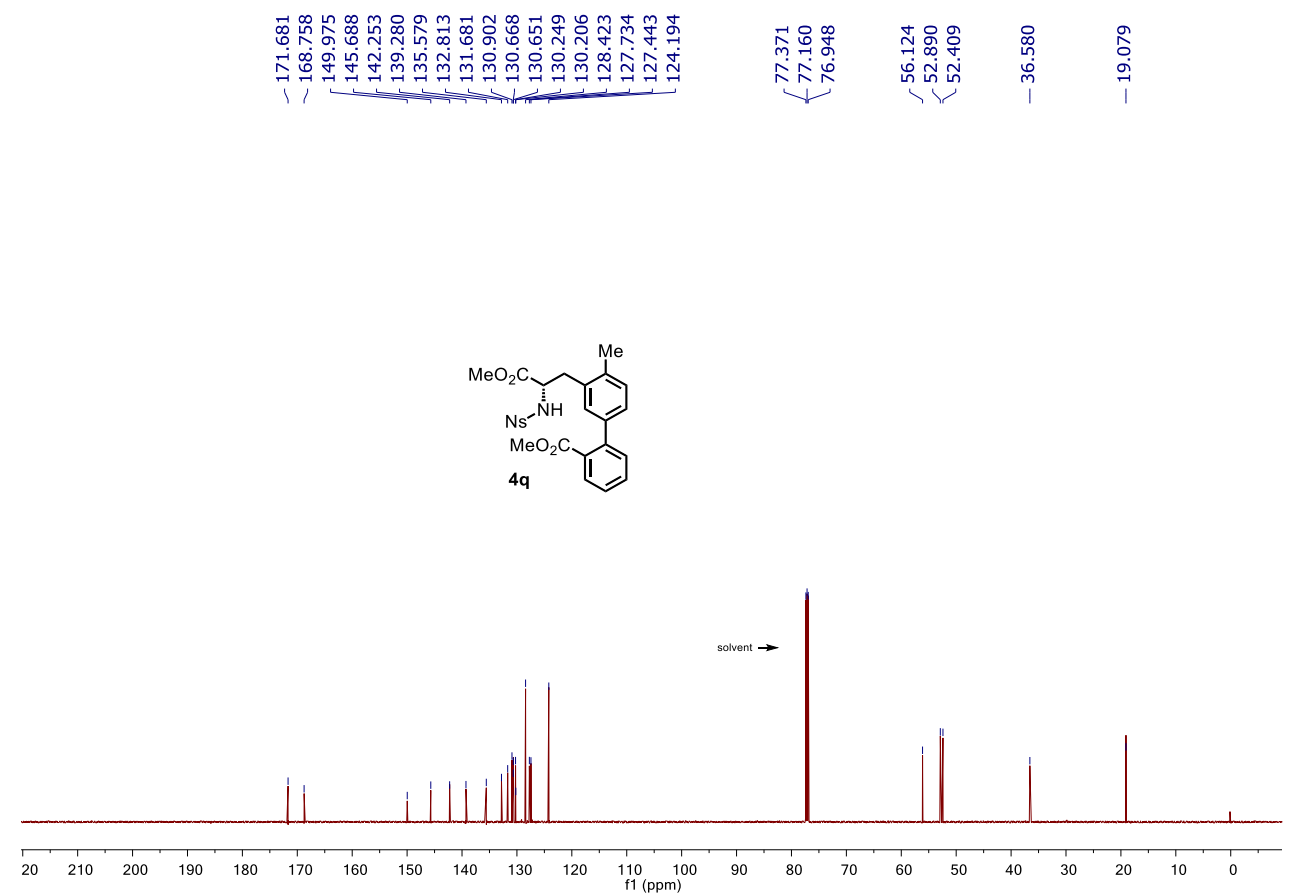



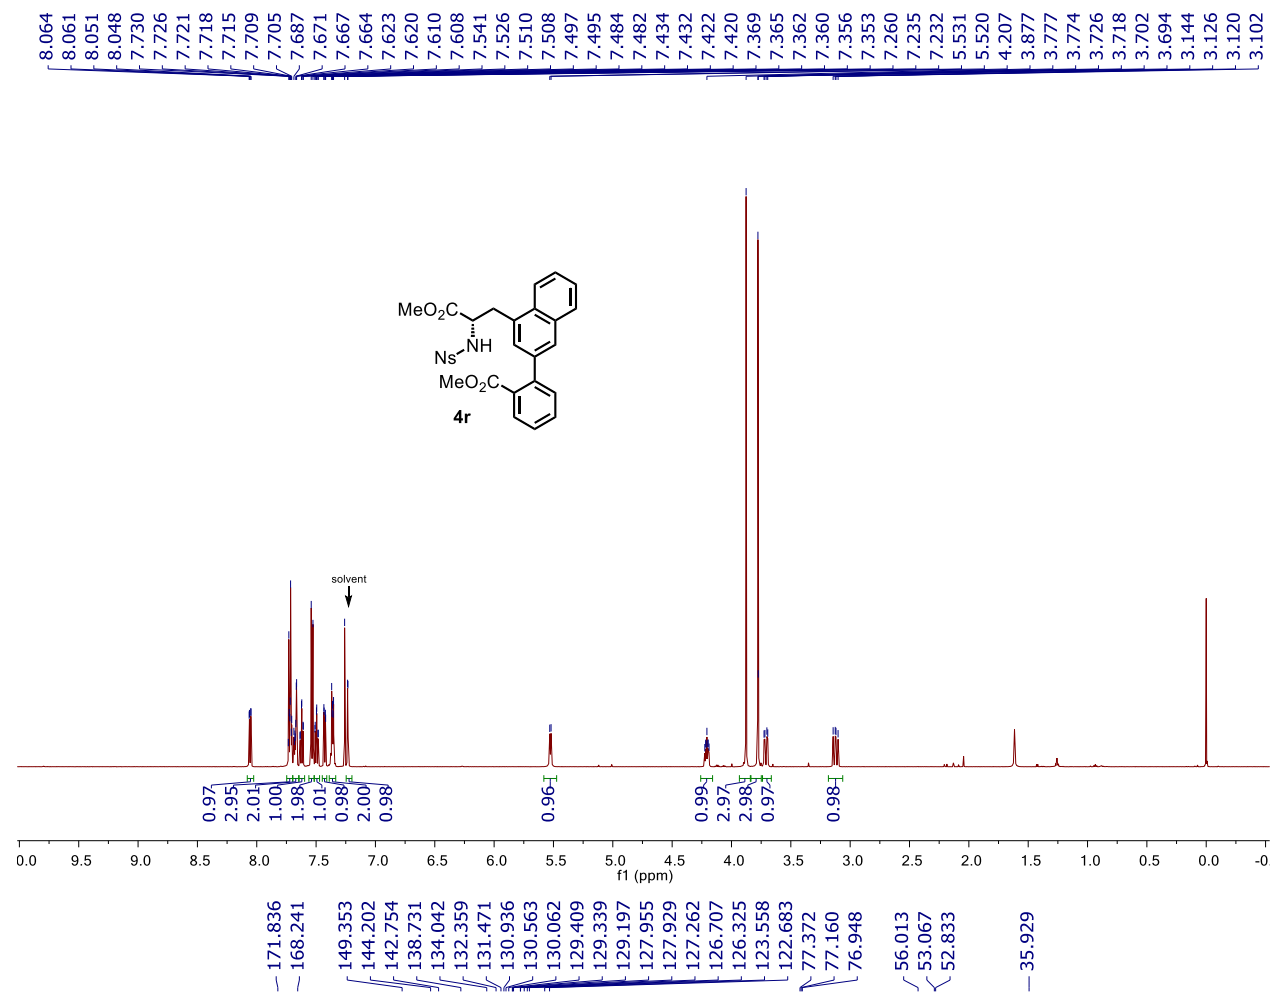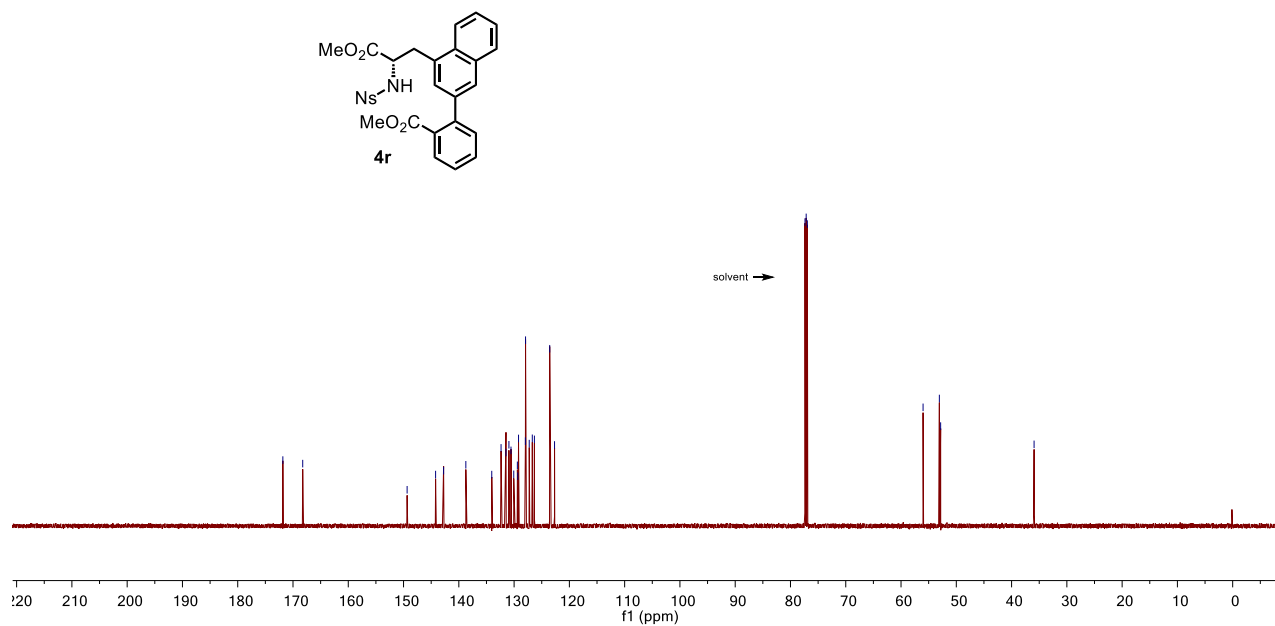

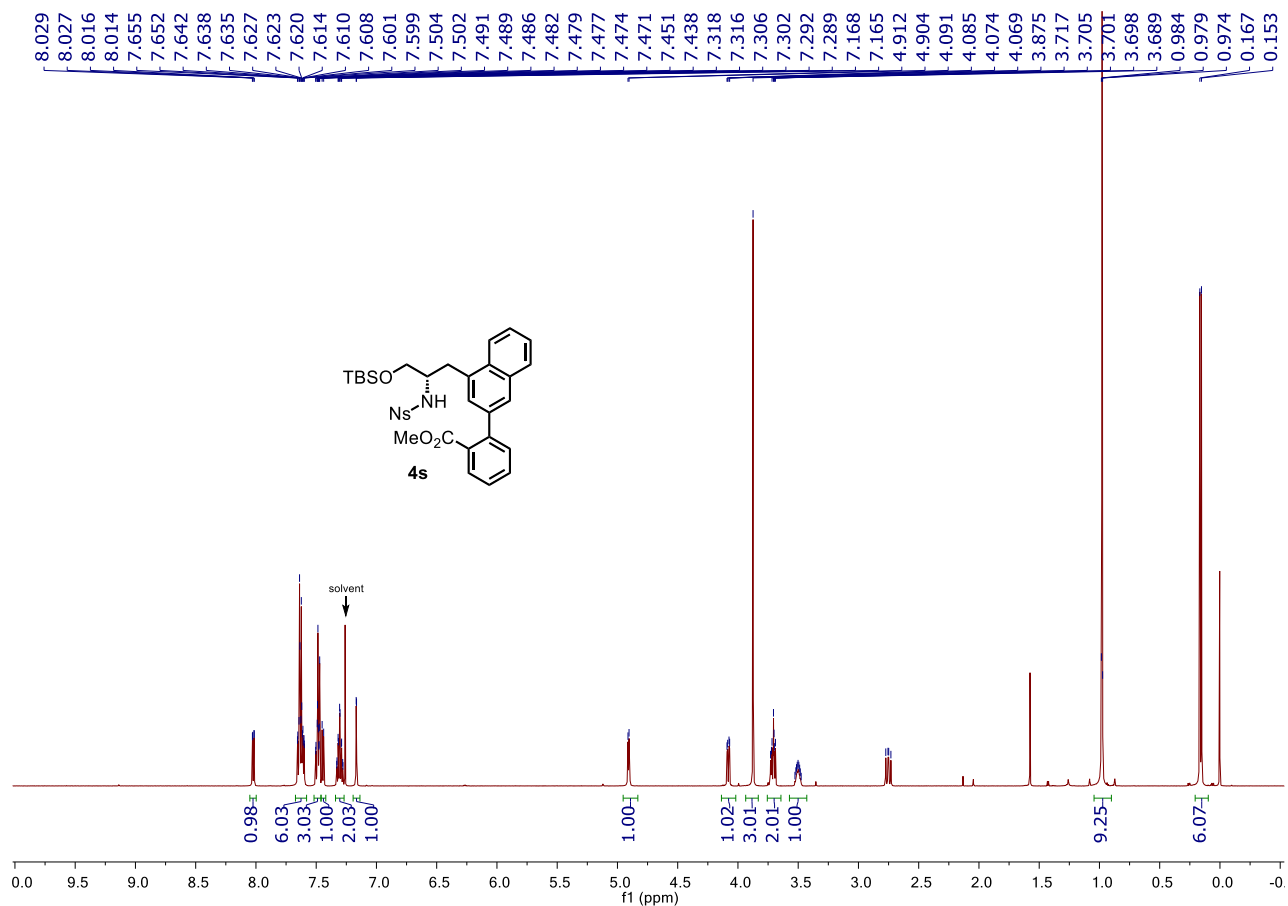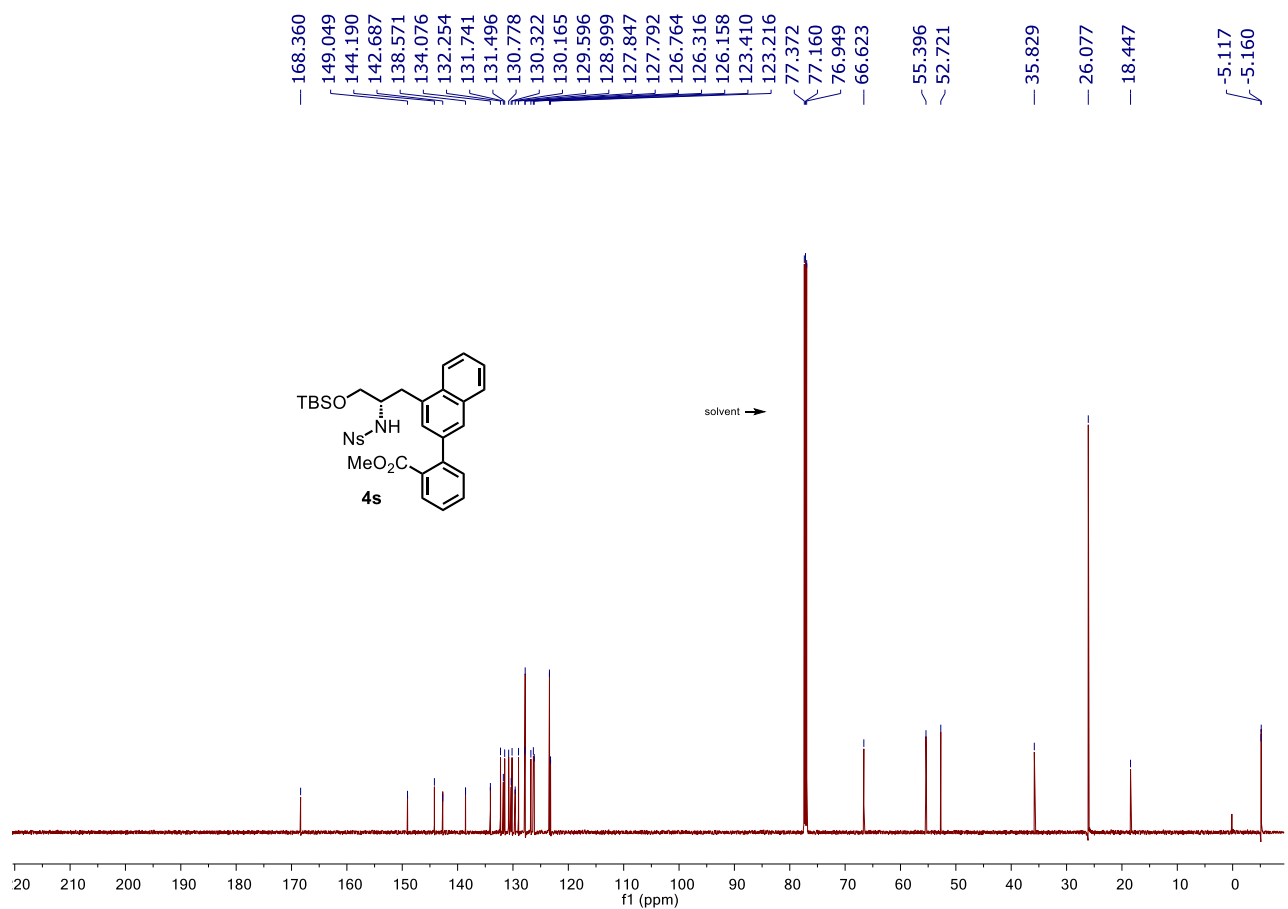

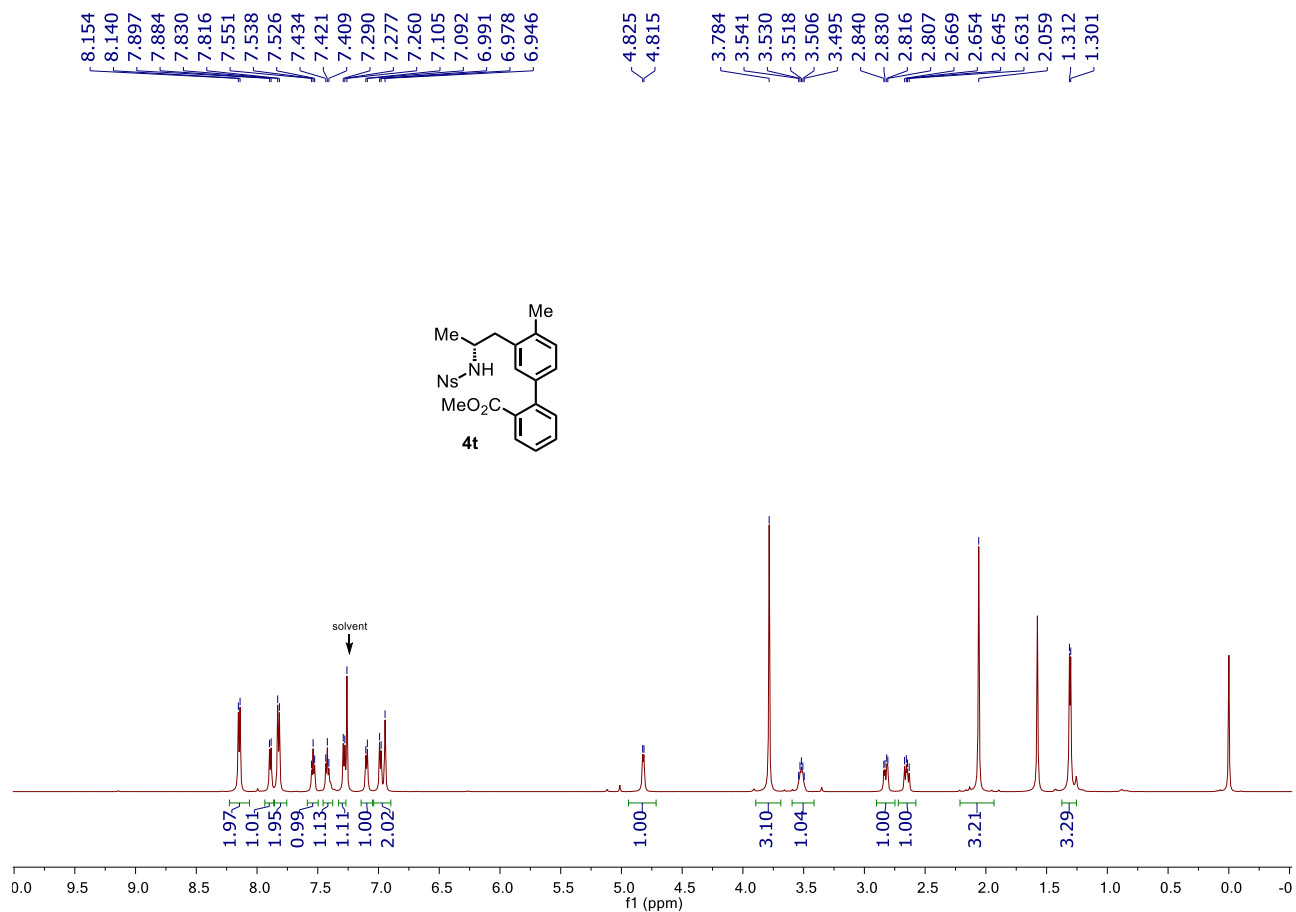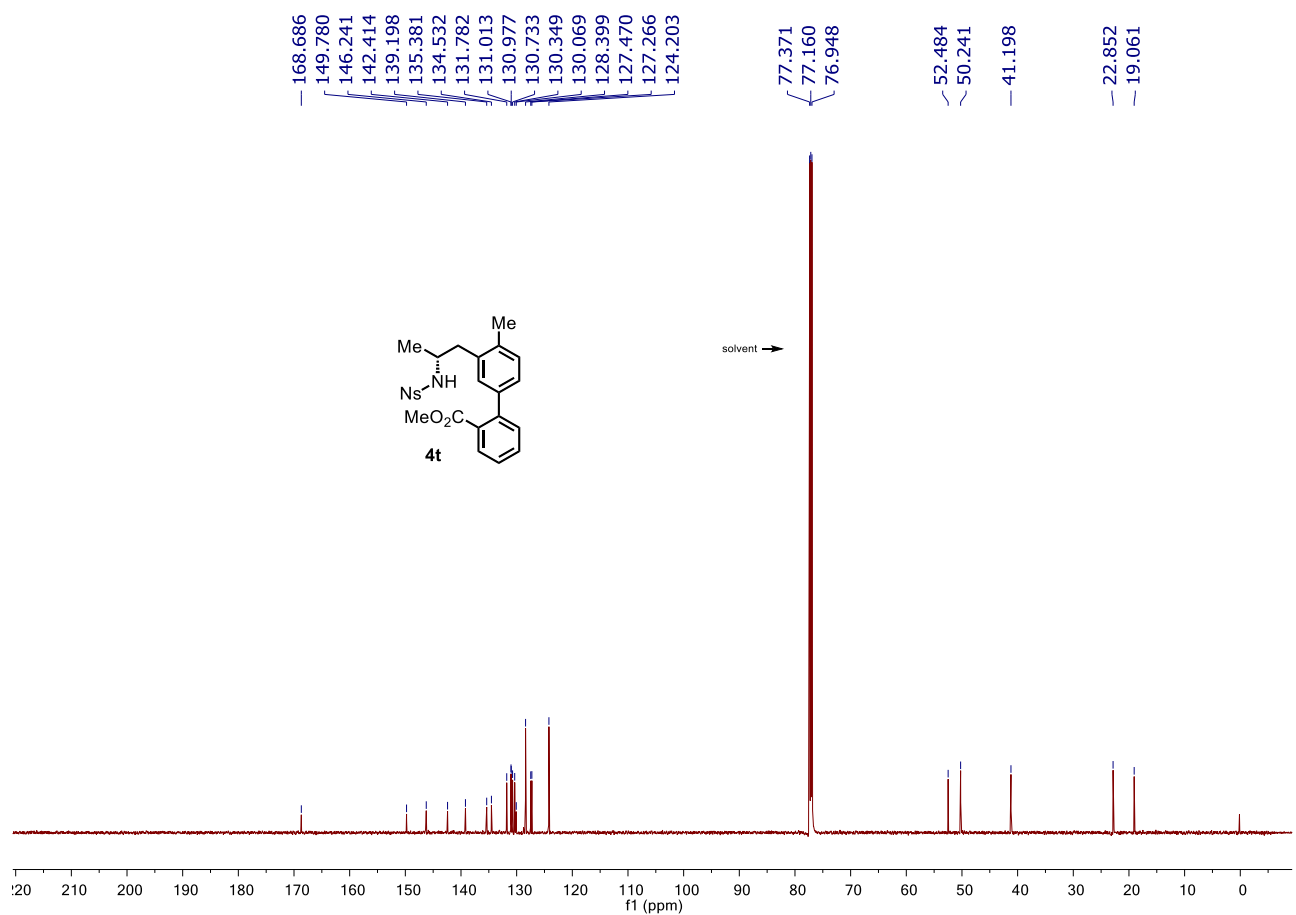

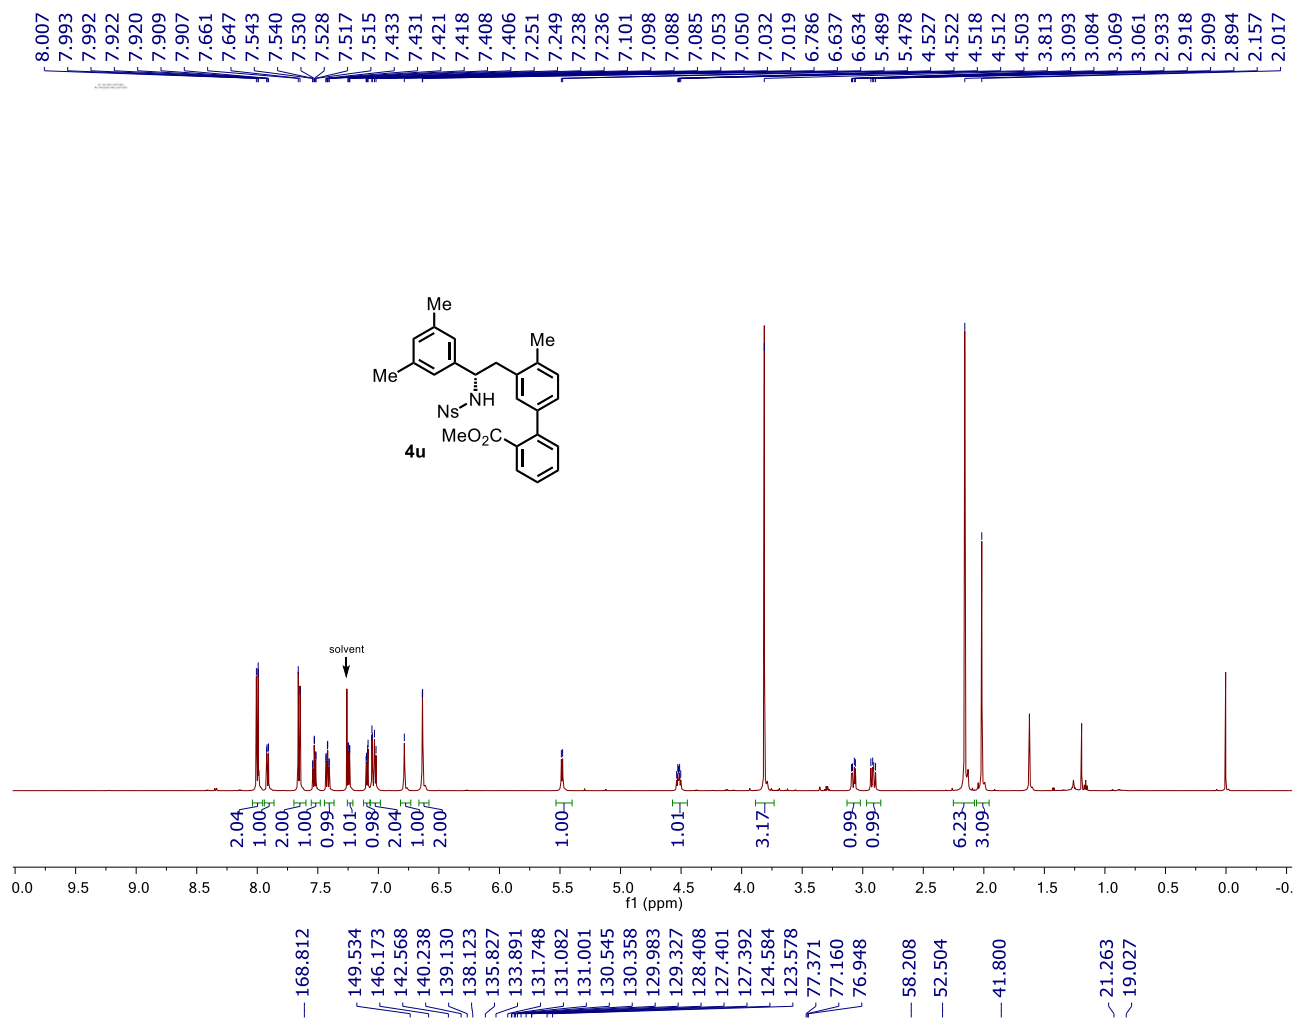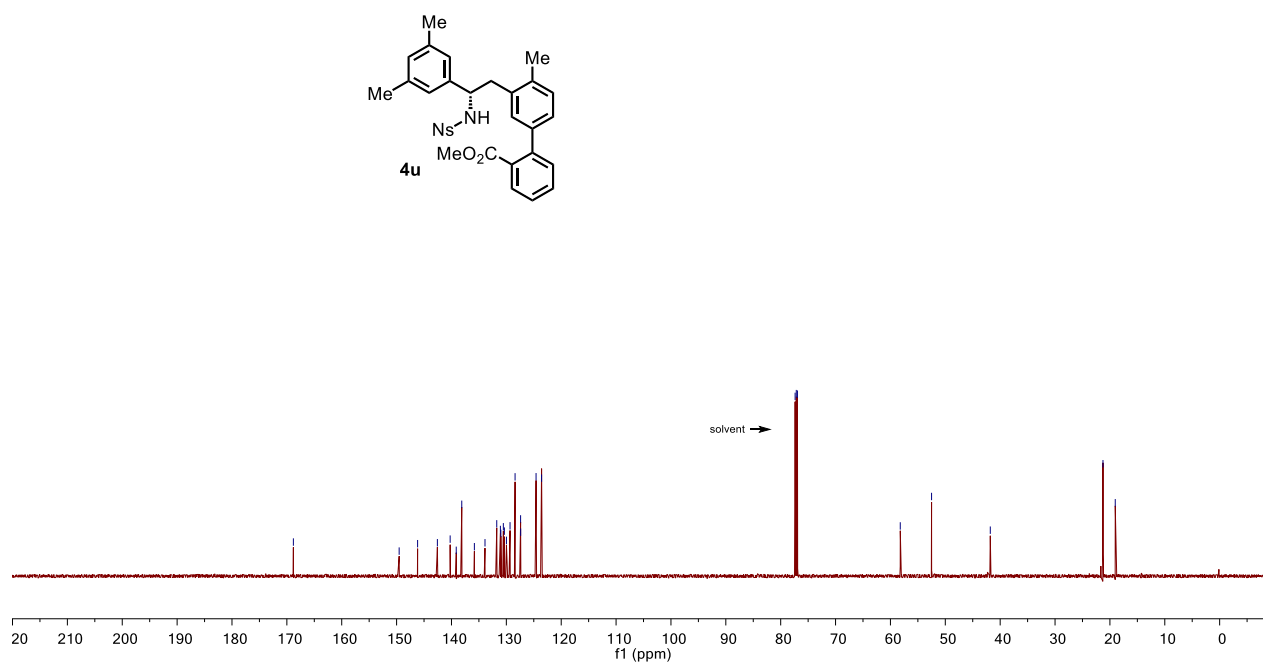

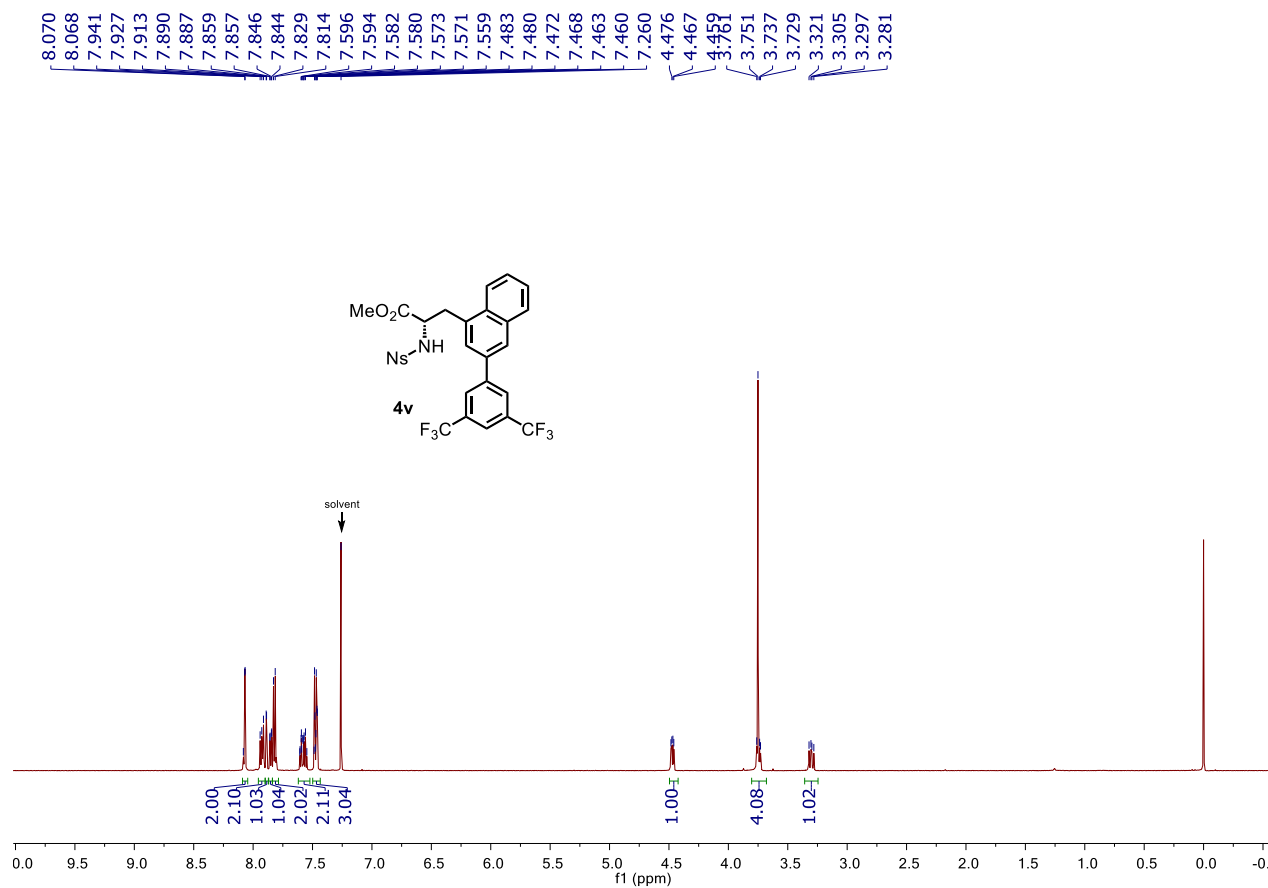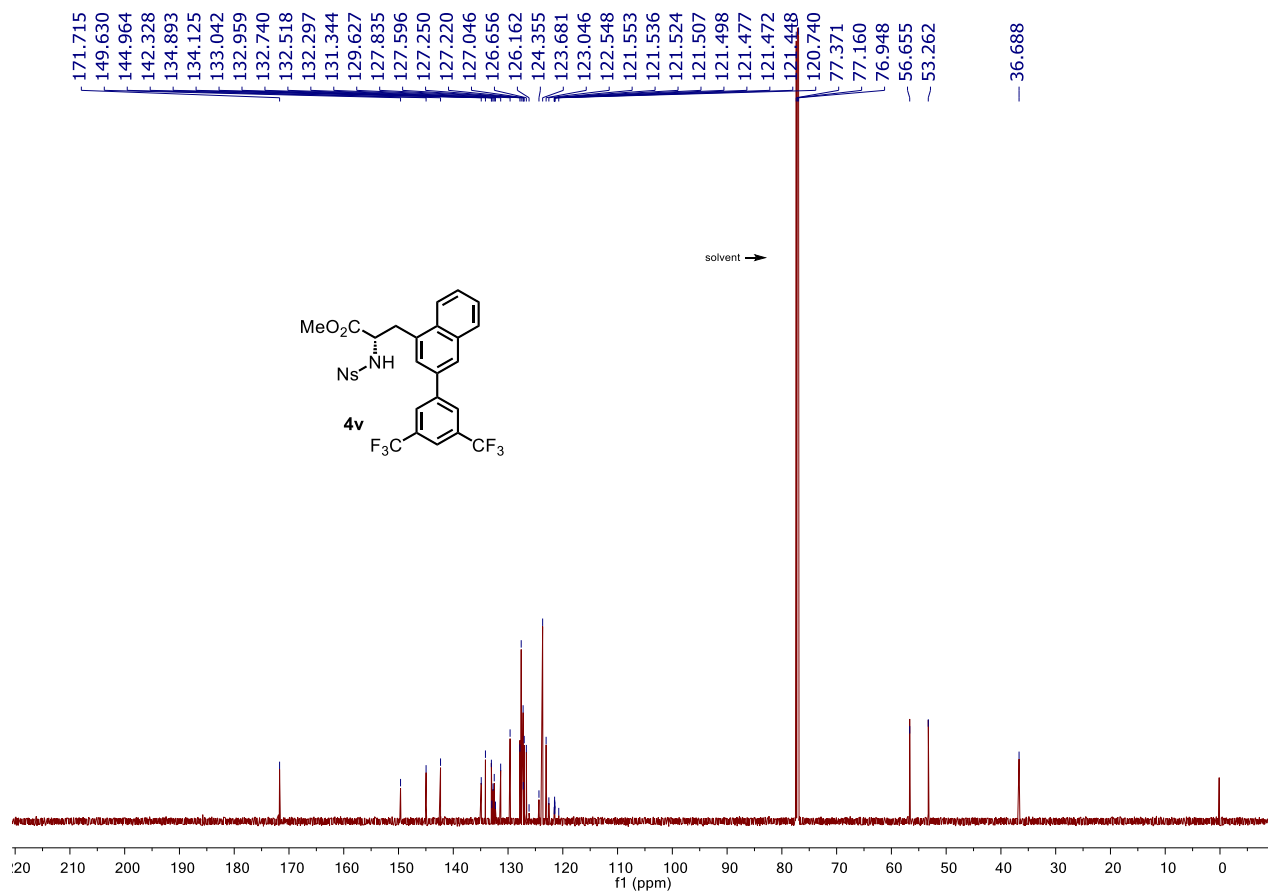

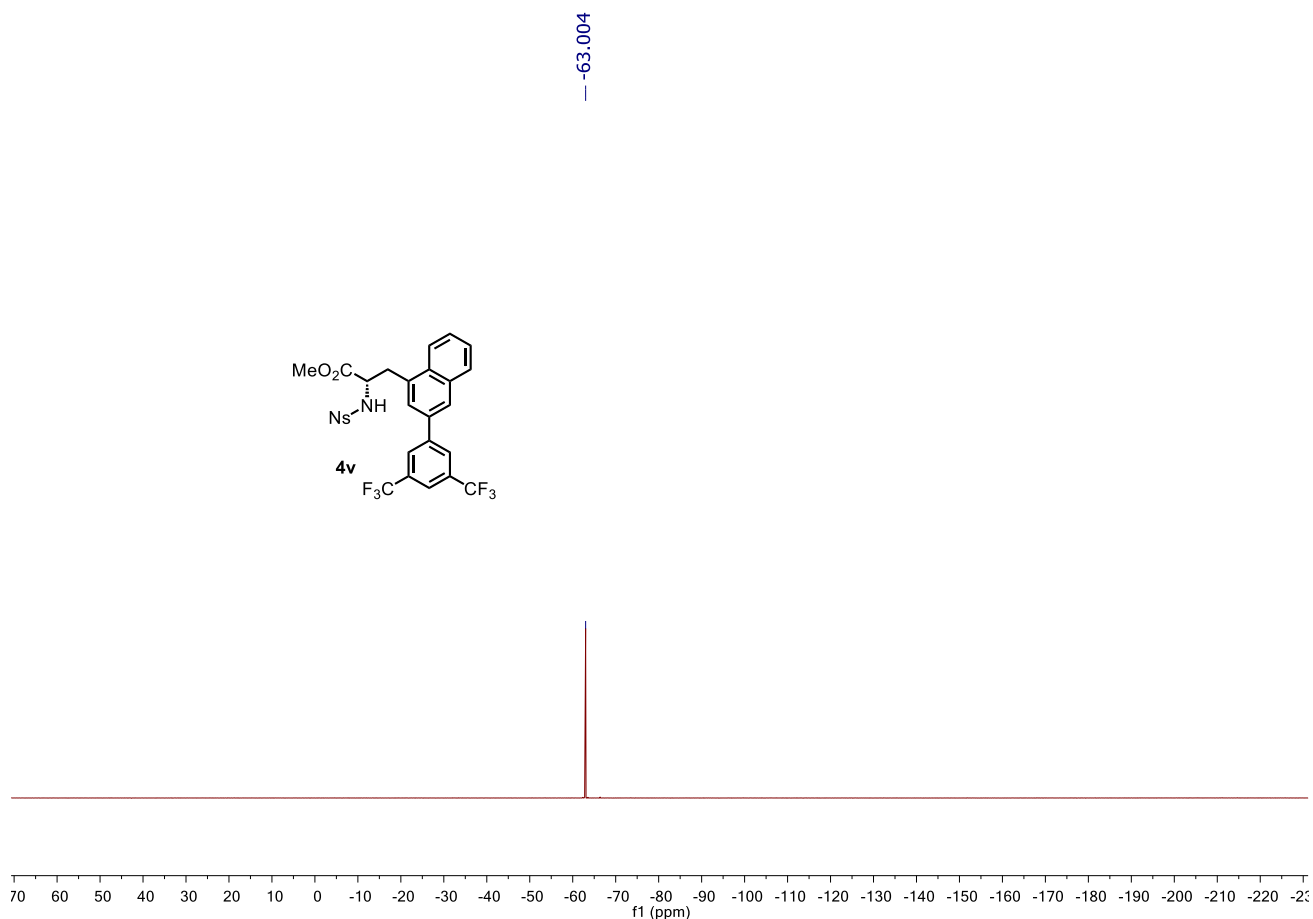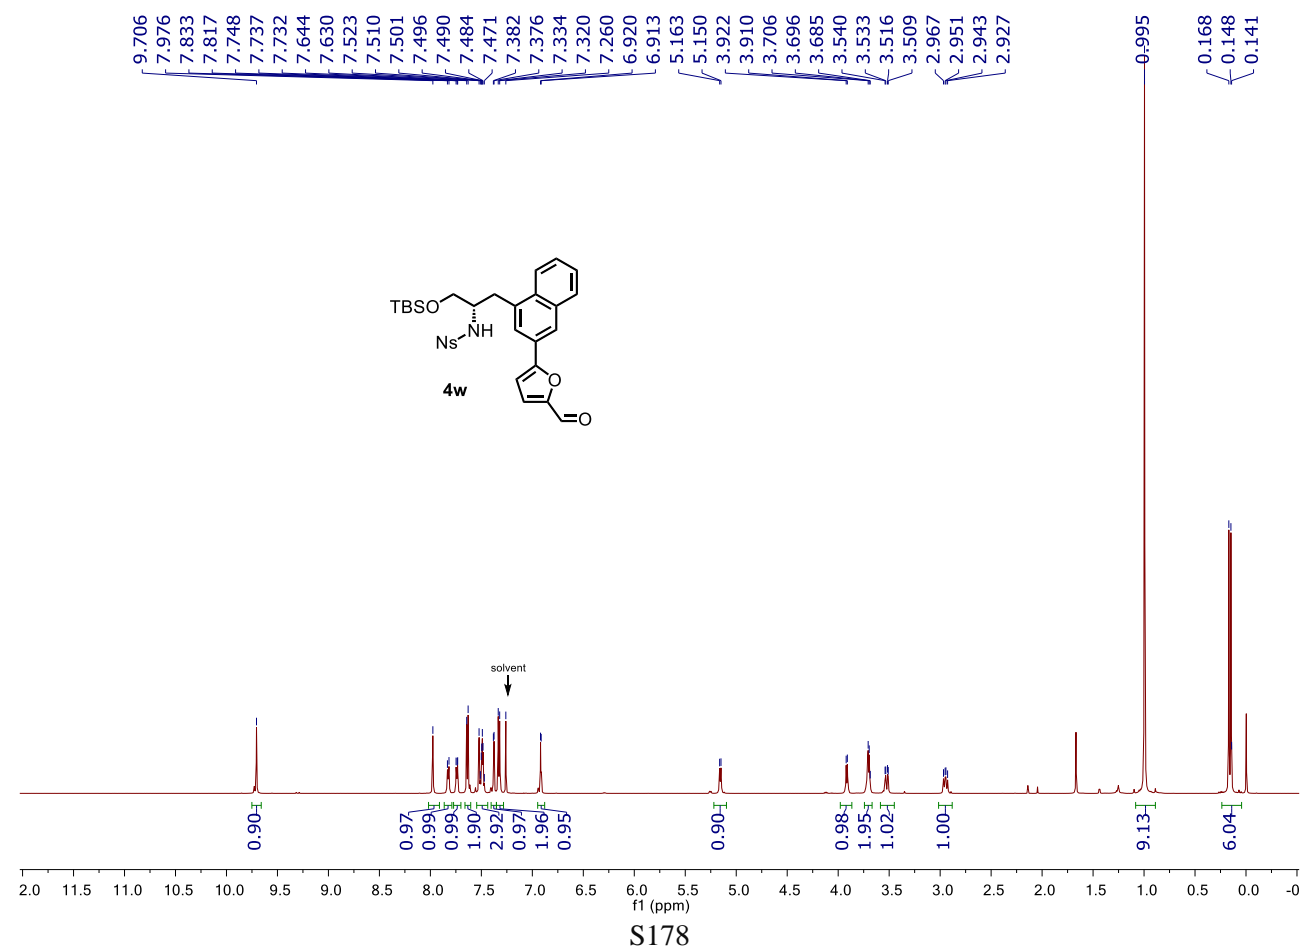

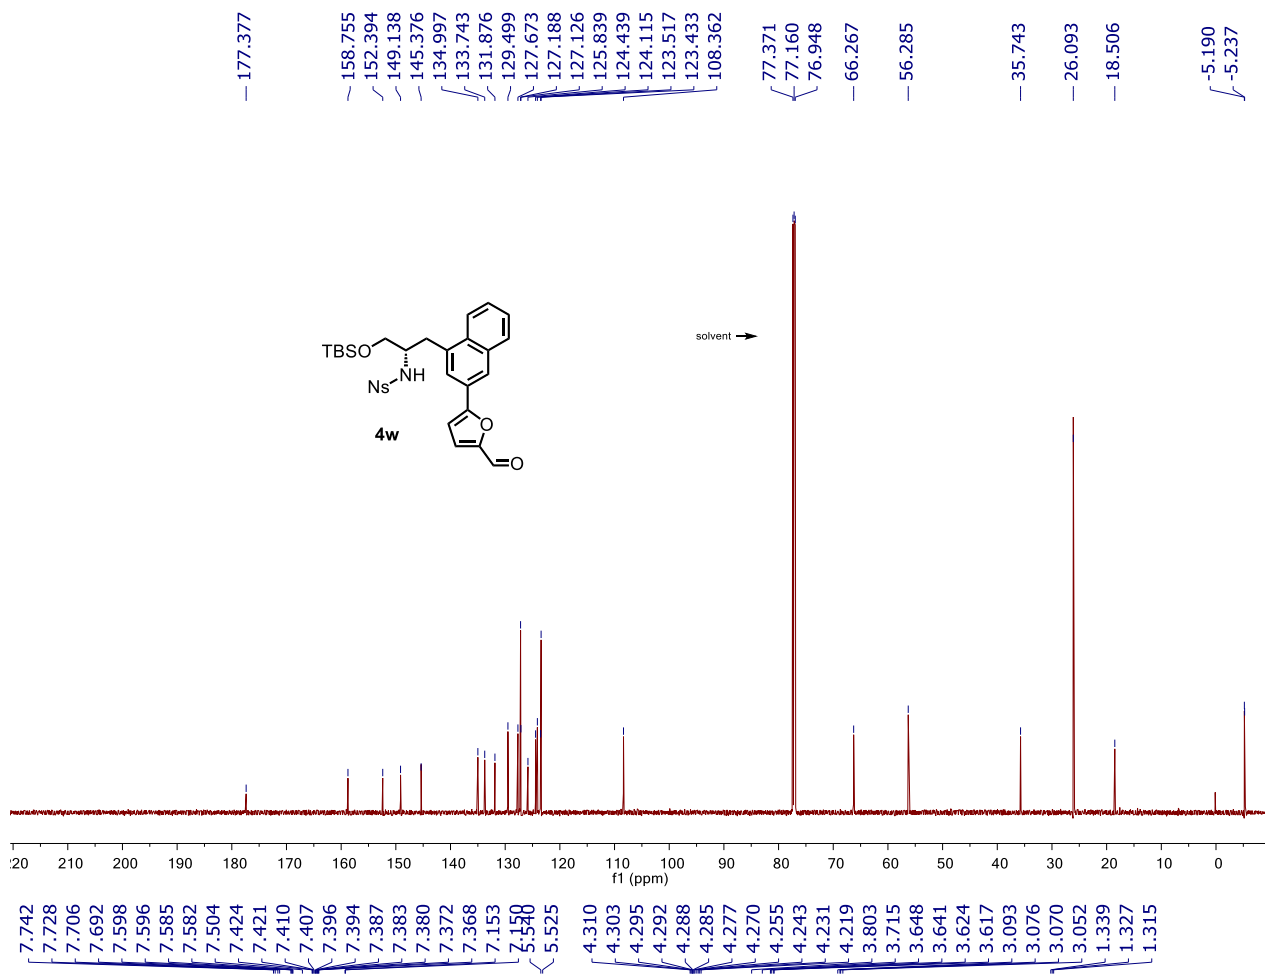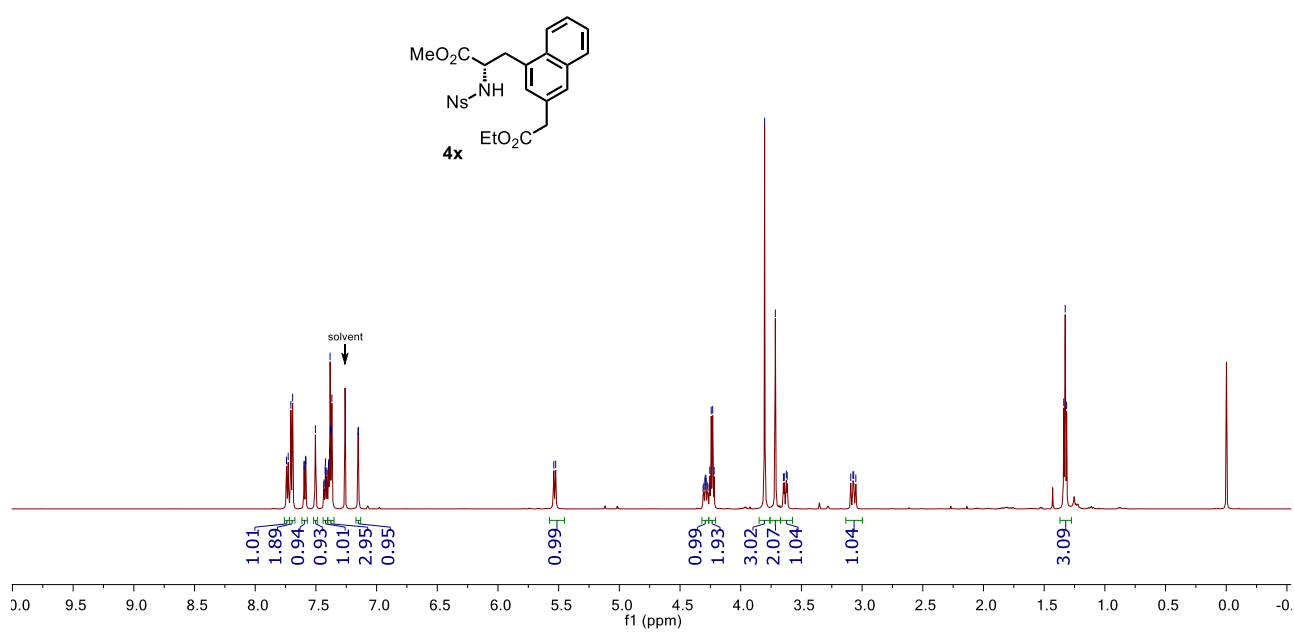

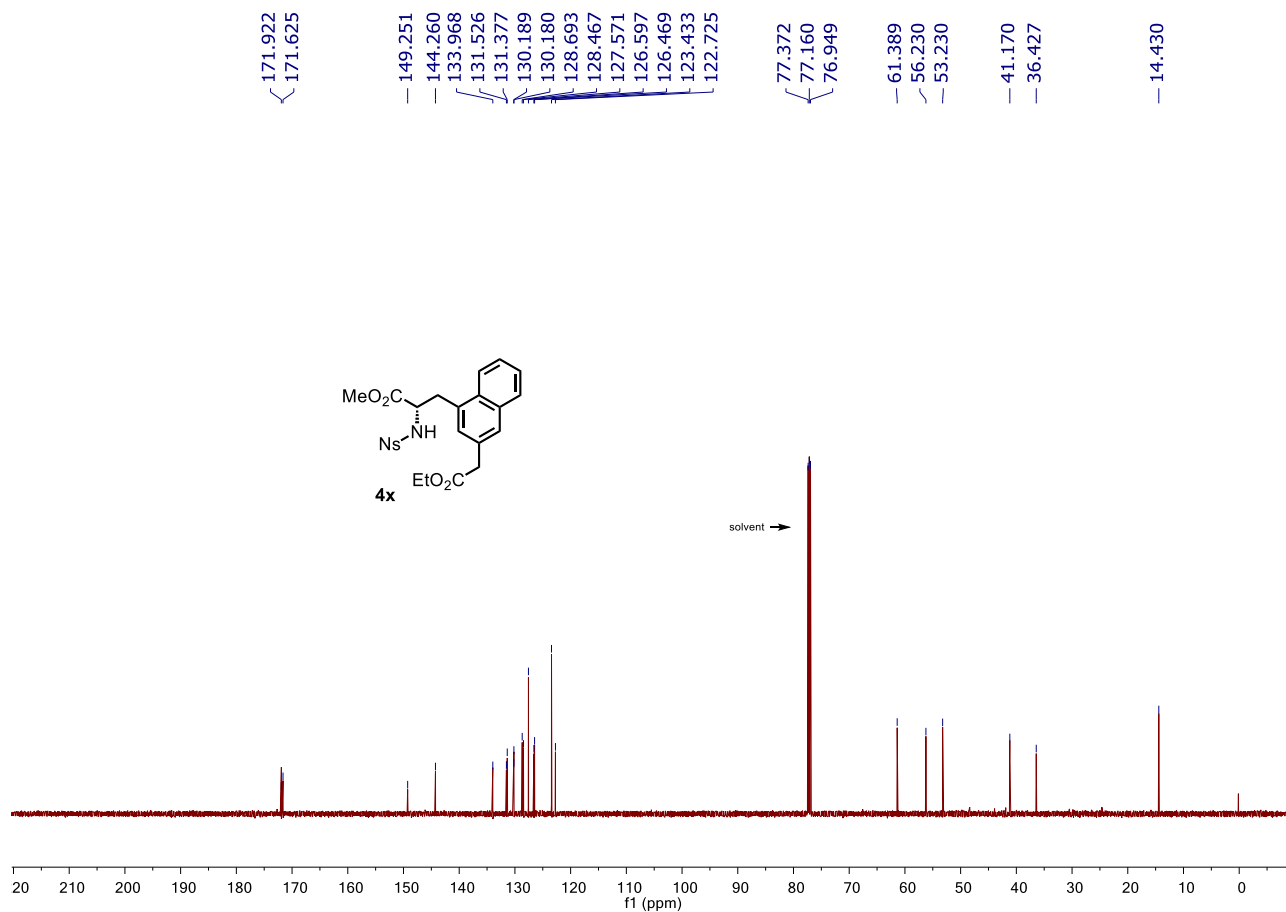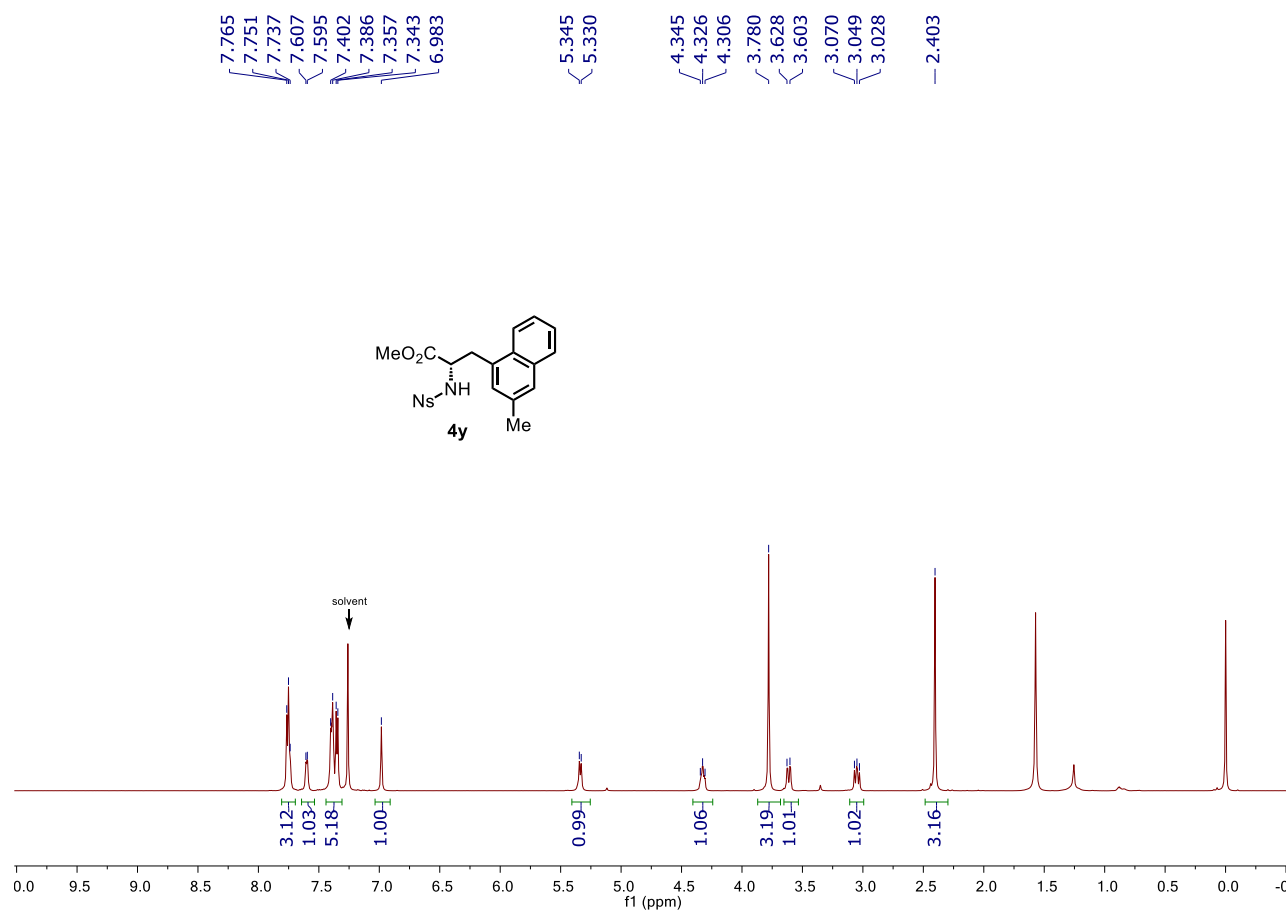



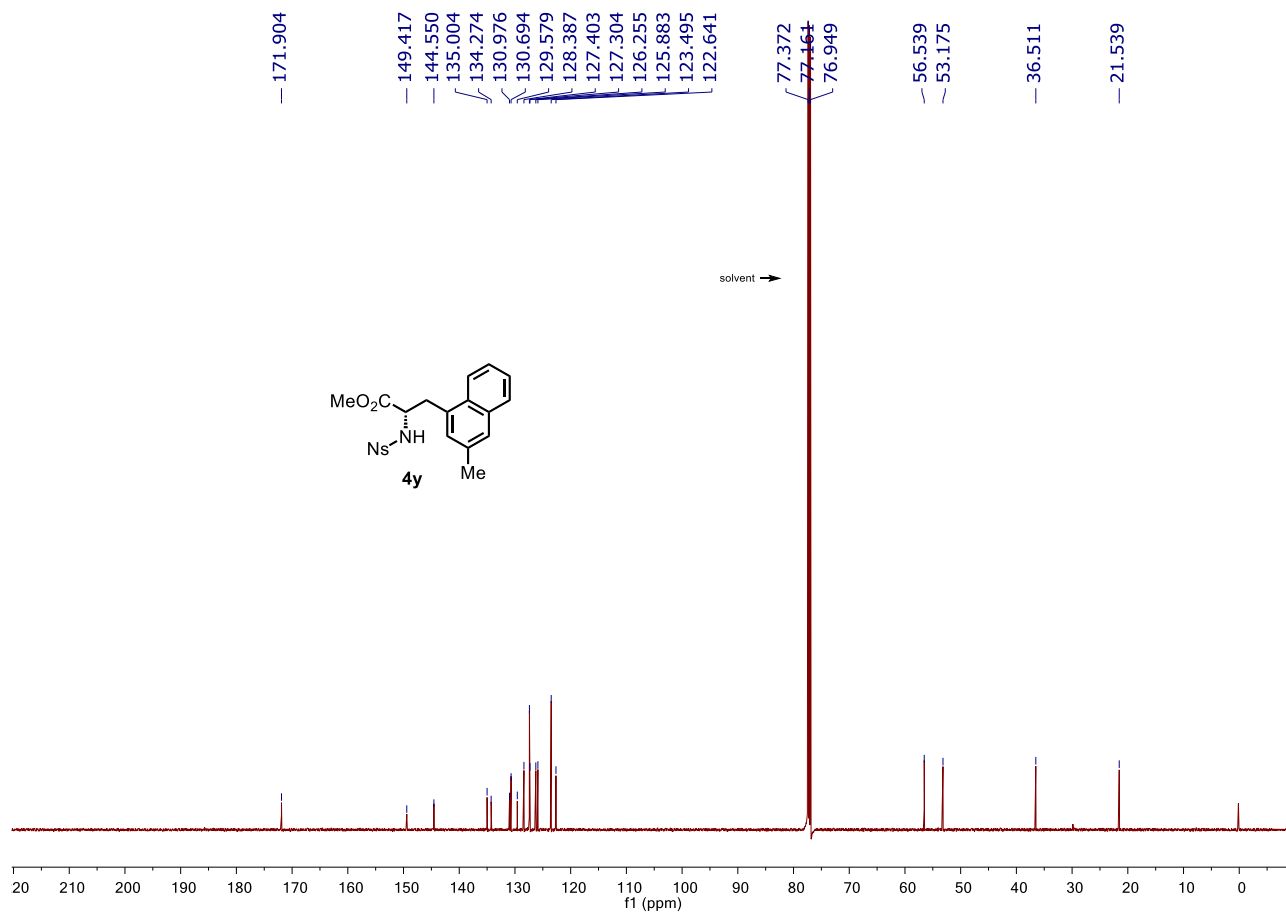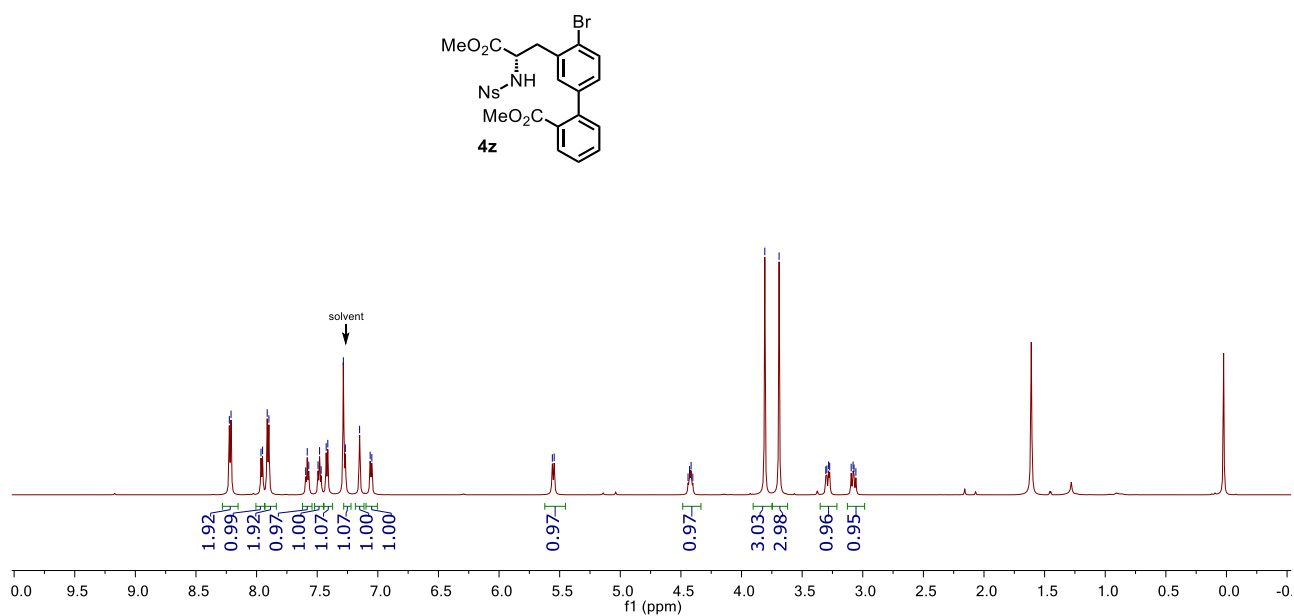

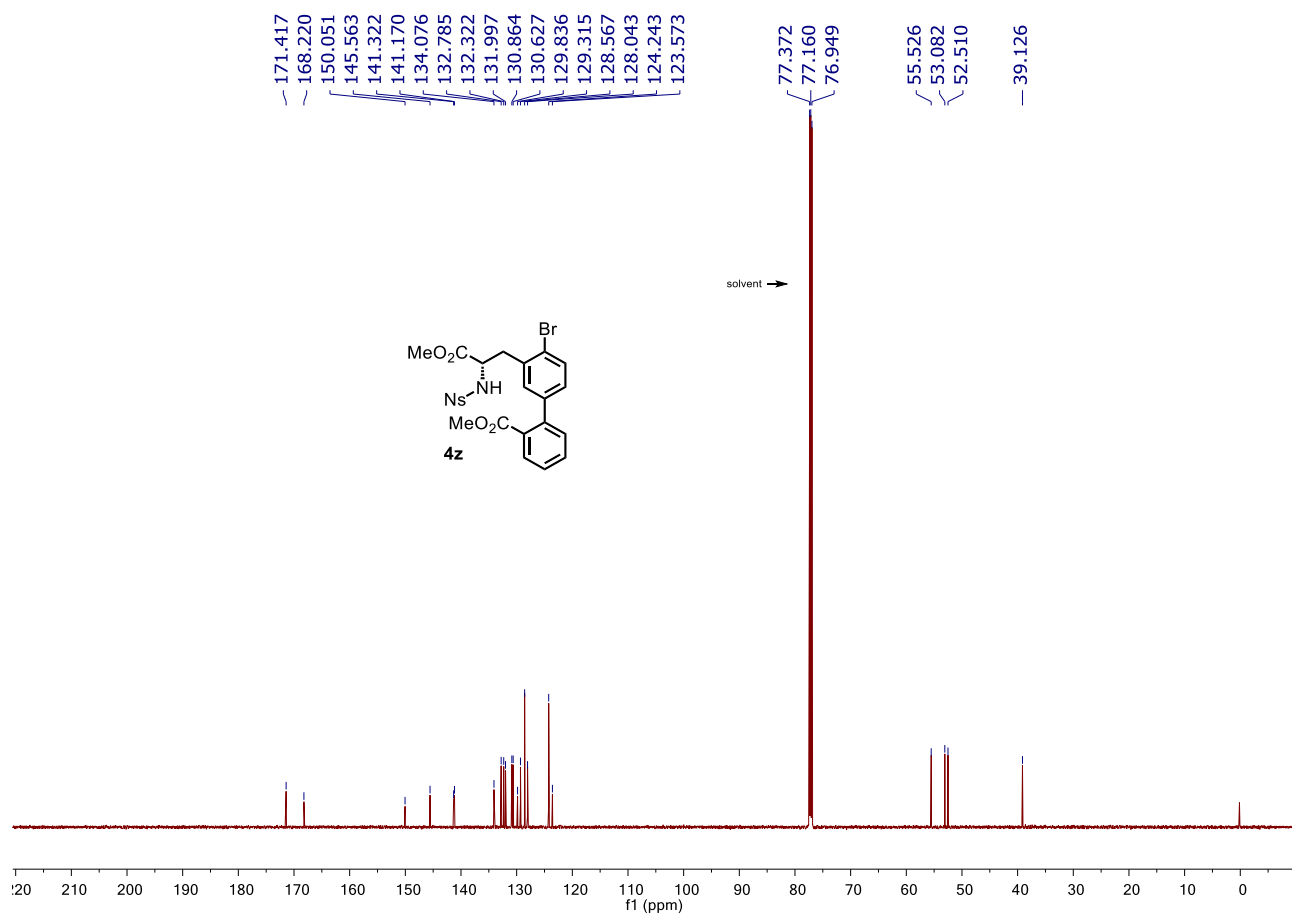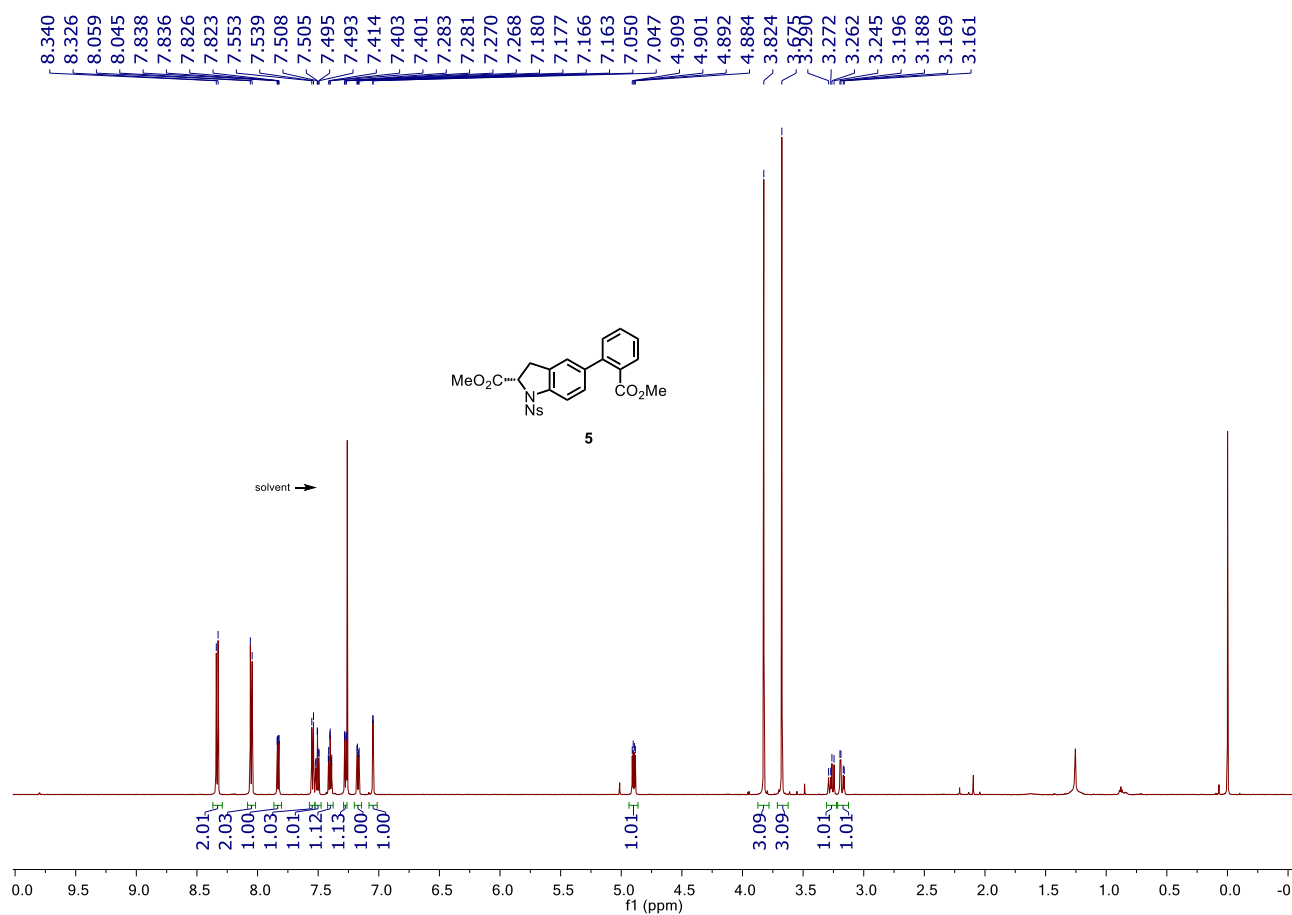

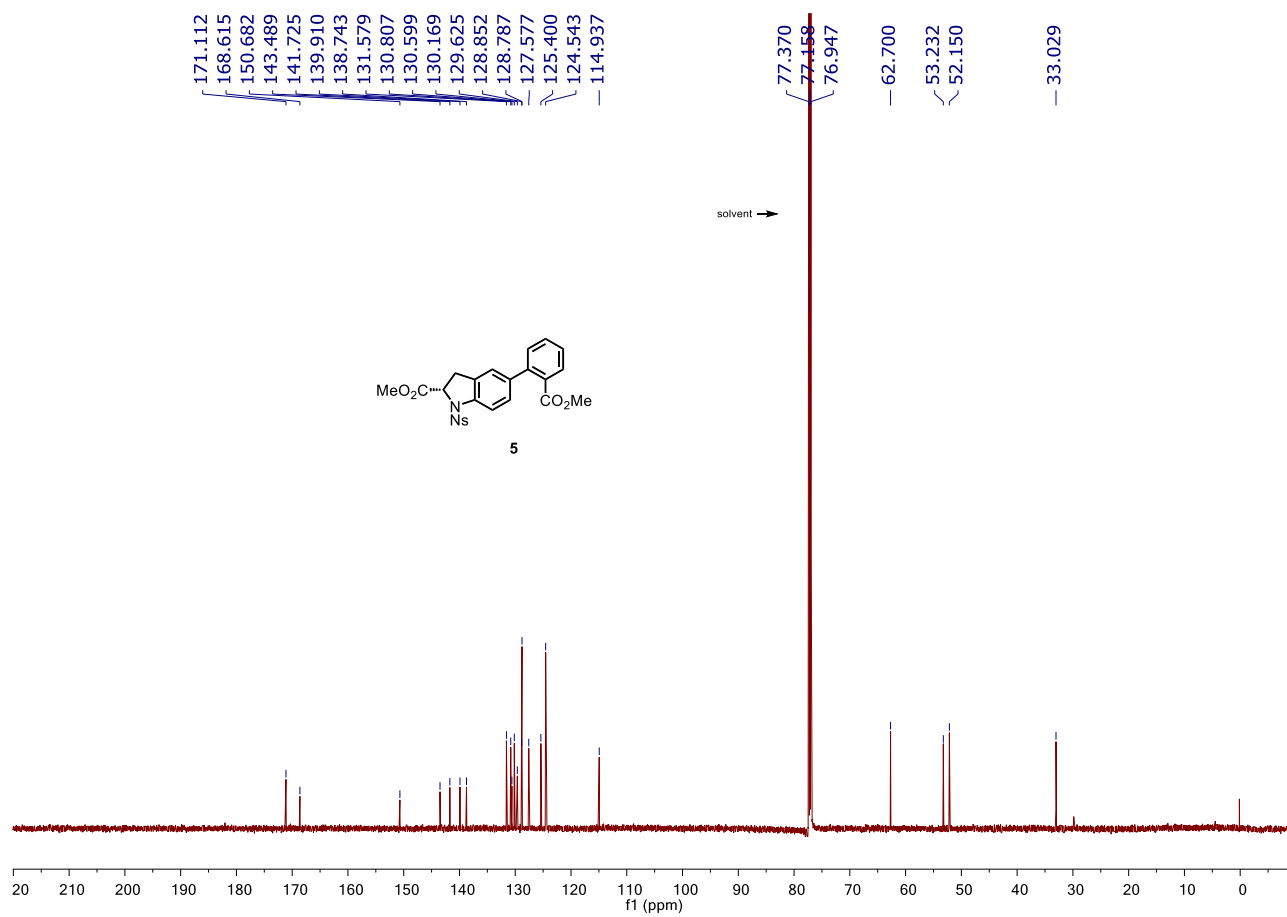

## SFC TRACES

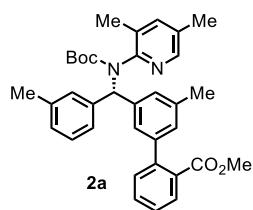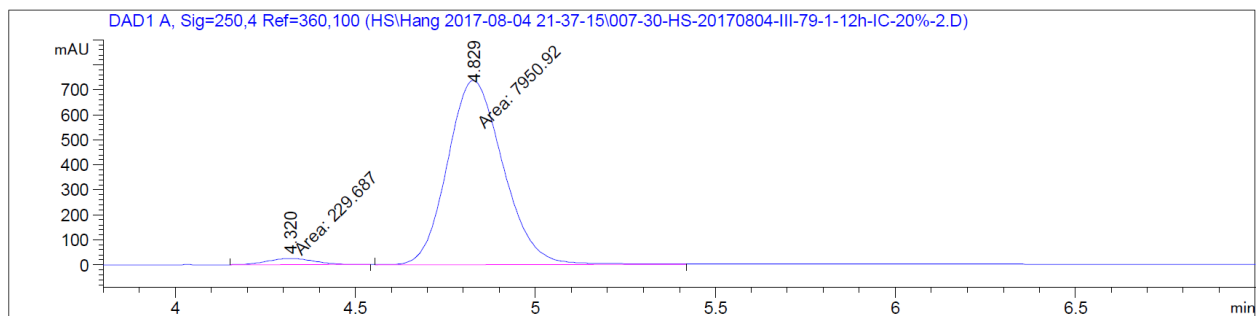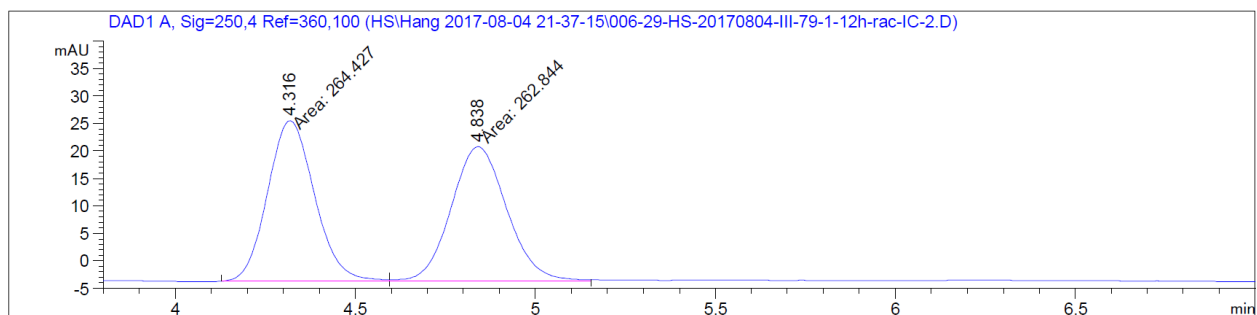

Signal 1: DAD1 A, Sig=250,4 Ref=360,100

| Peak # | RetTime [min] | Type | Width [min] | Area [mAU*s] | Height [mAU] | Area %  |
|--------|---------------|------|-------------|--------------|--------------|---------|
| 1      | 4.320         | MM   | 0.1509      | 229.68727    | 25.37218     | 2.8077  |
| 2      | 4.829         | MM   | 0.1797      | 7950.92139   | 737.59424    | 97.1923 |

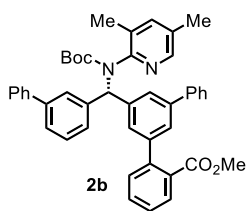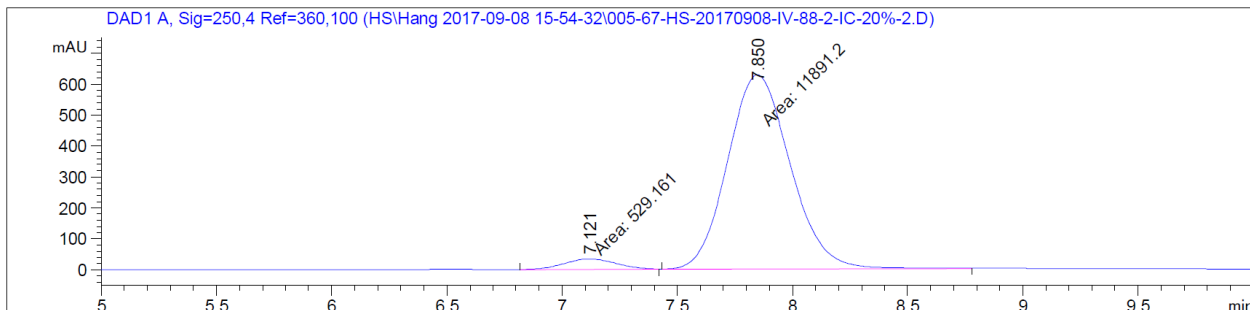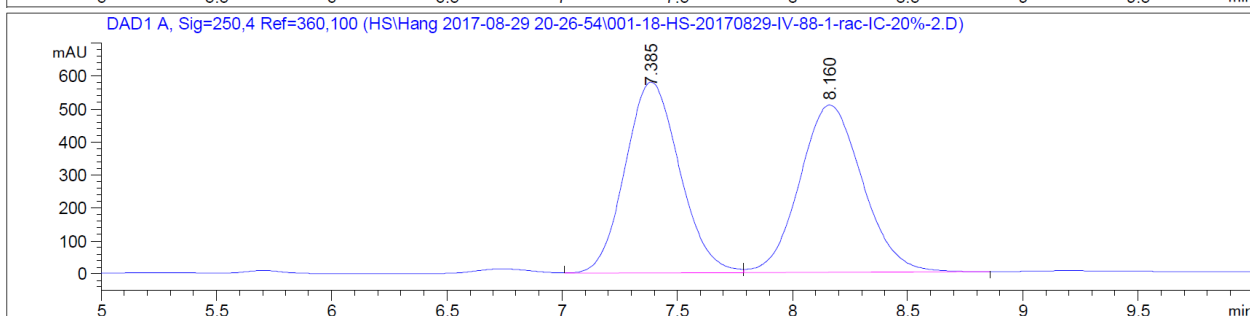

Signal 1: DAD1 A, Sig=250,4 Ref=360,100

| Peak # | RetTime [min] | Type | Width [min] | Area [mAU*s] | Height [mAU] | Area %  |
|--------|---------------|------|-------------|--------------|--------------|---------|
| 1      | 7.121         | MM   | 0.2614      | 529.16058    | 33.73596     | 4.2604  |
| 2      | 7.850         | MM   | 0.3155      | 1.18912e4    | 628.12677    | 95.7396 |

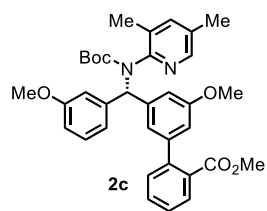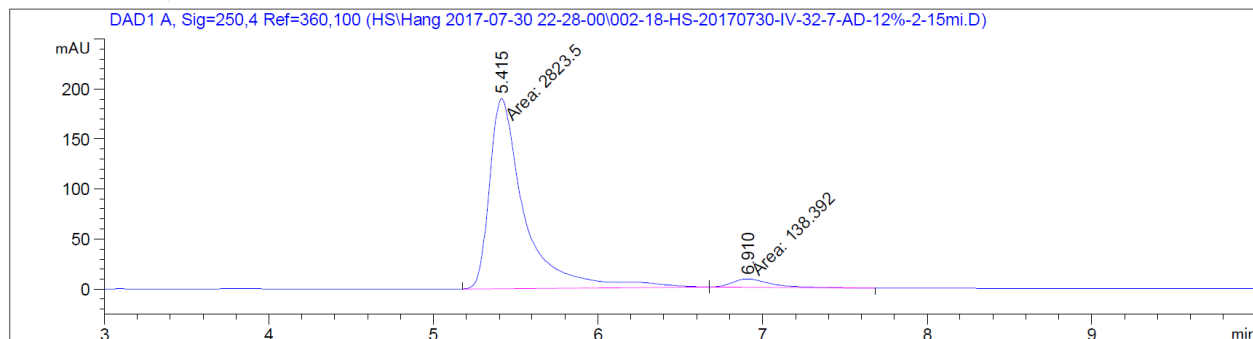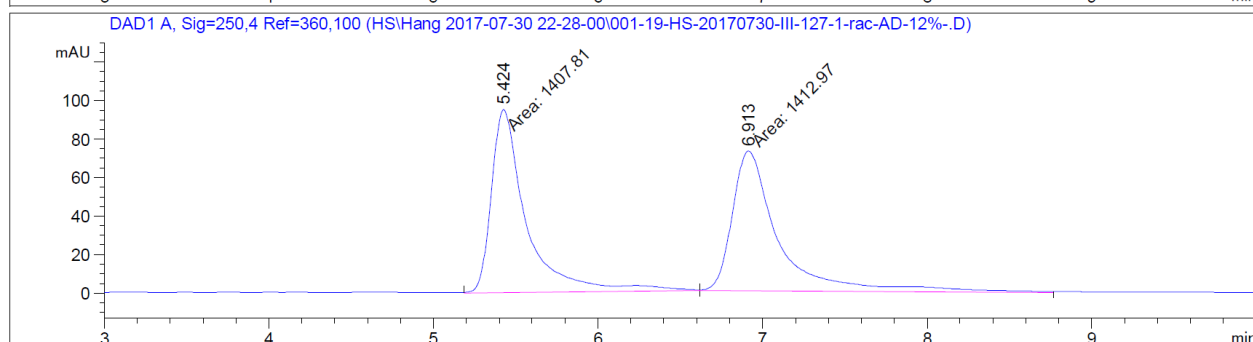

Signal 1: DAD1 A, Sig=250,4 Ref=360,100

| Peak # | RetTime [min] | Type | Width [min] | Area [mAU*s] | Height [mAU] | Area %  |
|--------|---------------|------|-------------|--------------|--------------|---------|
| 1      | 5.415         | MM   | 0.2476      | 2823.50439   | 190.06265    | 95.3276 |
| 2      | 6.910         | MM   | 0.2723      | 138.39246    | 8.46927      | 4.6724  |

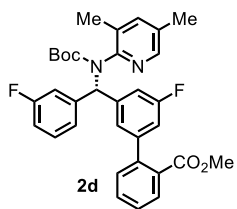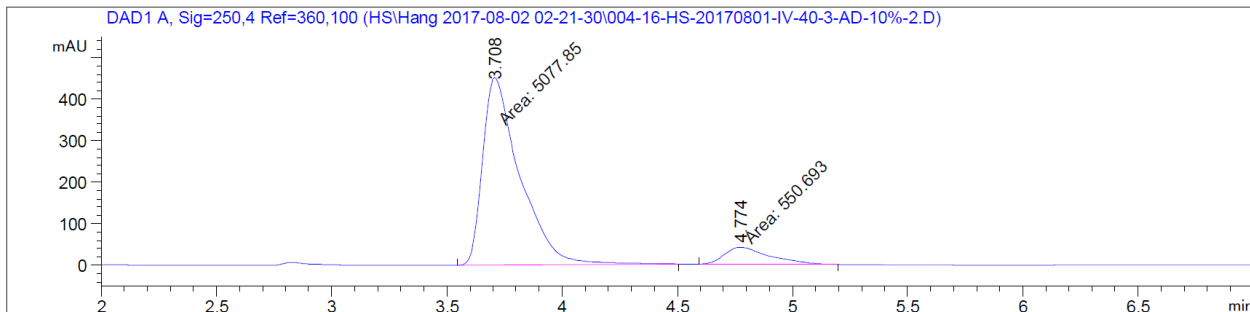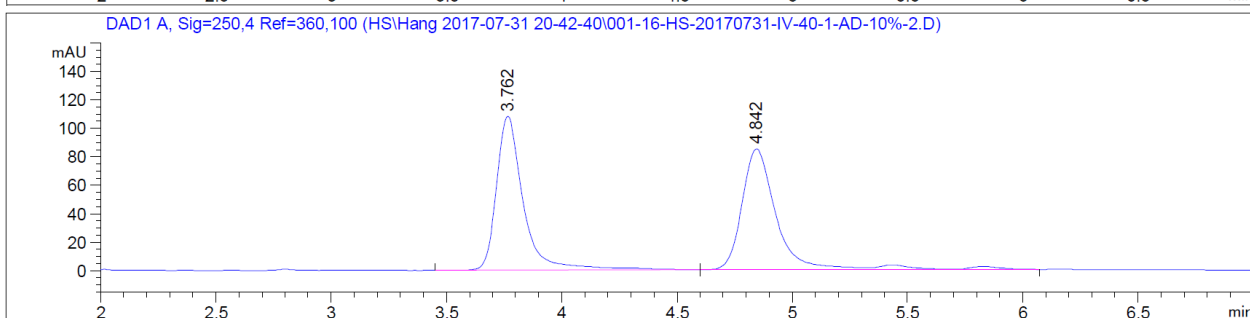

| Peak #   | RetTime [min] | Type | Width [min] | Area [mAU*s] | Height [mAU] | Area %  |
|----------|---------------|------|-------------|--------------|--------------|---------|
| 1        | 3.708         | MM   | 0.1873      | 5077.84863   | 451.93127    | 90.2161 |
| 2        | 4.774         | MM   | 0.2226      | 550.69342    | 41.22754     | 9.7839  |
| Totals : |               |      |             | 5628.54205   | 493.15881    |         |

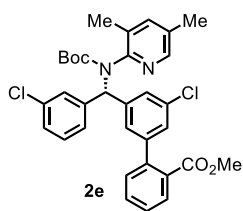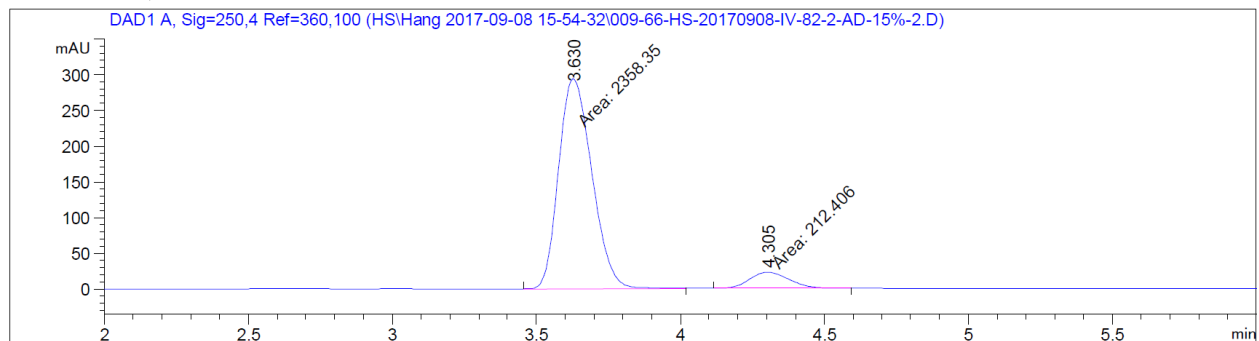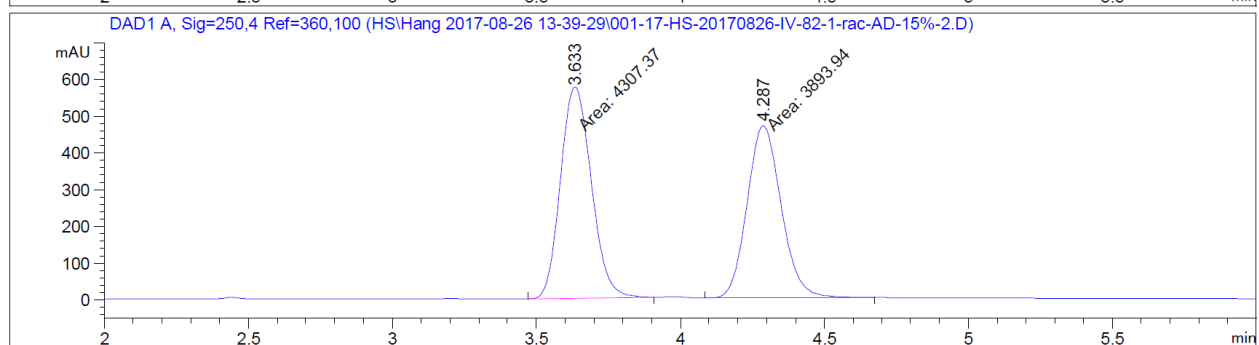

Signal 1: DAD1 A, Sig=250,4 Ref=360,100

| Peak # | RetTime [min] | Type | Width [min] | Area [mAU*s] | Height [mAU] | Area %  |
|--------|---------------|------|-------------|--------------|--------------|---------|
| 1      | 3.630         | MM   | 0.1336      | 2358.35352   | 294.12524    | 91.7376 |
| 2      | 4.305         | MM   | 0.1585      | 212.40570    | 22.33520     | 8.2624  |



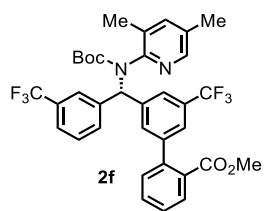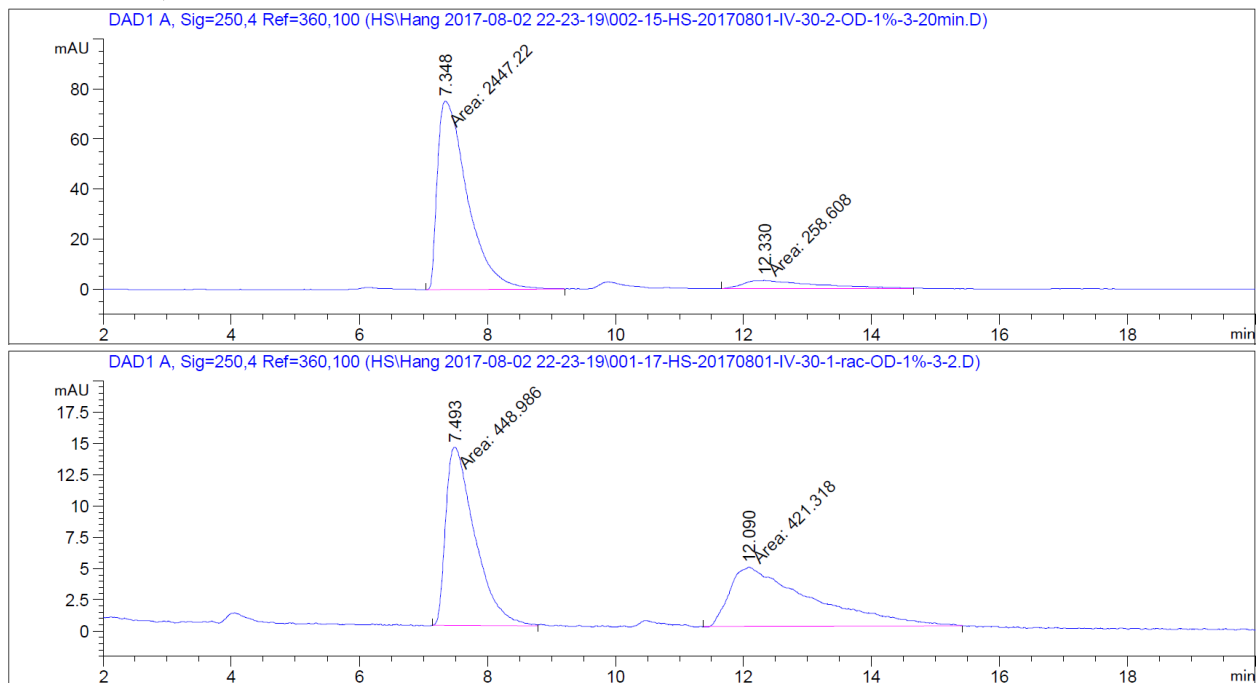

Signal 1: DAD1 A, Sig=250,4 Ref=360,100

| Peak # | RetTime [min] | Type | Width [min] | Area [mAU*s] | Height [mAU] | Area %  |
|--------|---------------|------|-------------|--------------|--------------|---------|
| 1      | 7.348         | MM   | 0.5418      | 2447.21826   | 75.27472     | 90.4425 |
| 2      | 12.330        | MM   | 1.3038      | 258.60831    | 3.30577      | 9.5575  |

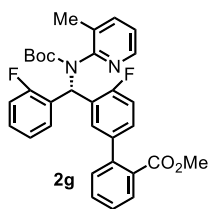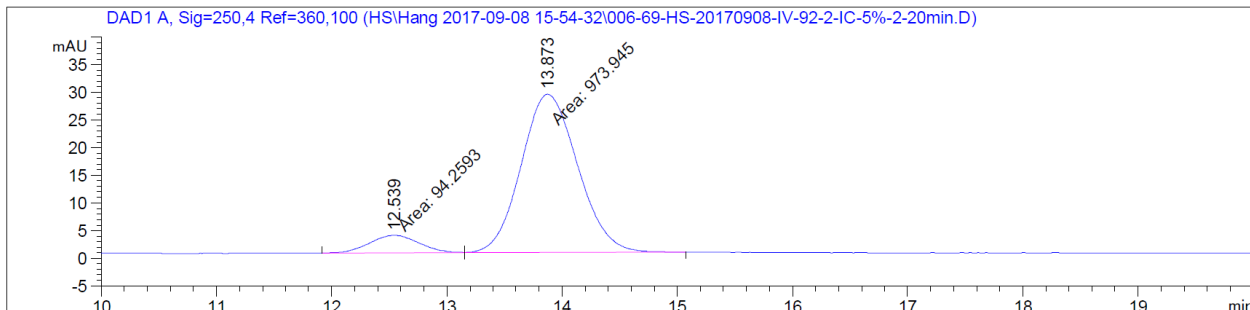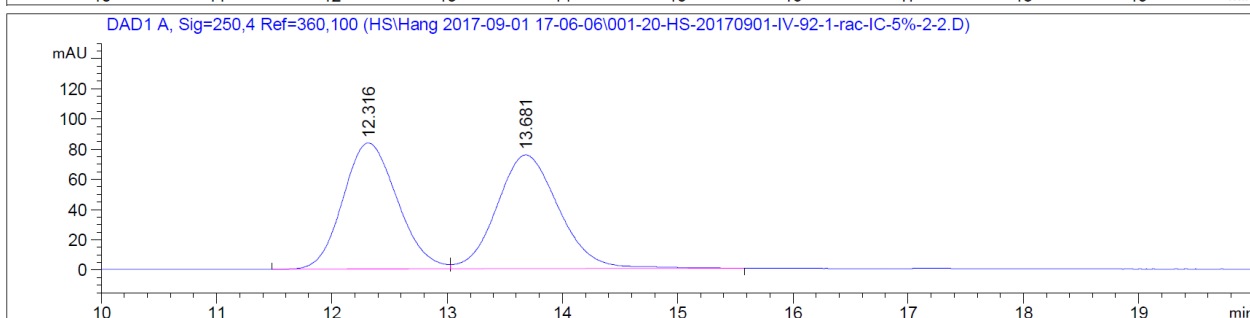

Signal 1: DAD1 A, Sig=250,4 Ref=360,100

| Peak # | RetTime [min] | Type | Width [min] | Area [mAU*s] | Height [mAU] | Area %  |
|--------|---------------|------|-------------|--------------|--------------|---------|
| 1      | 12.539        | MM   | 0.4980      | 94.25928     | 3.15432      | 8.8241  |
| 2      | 13.873        | MM   | 0.5678      | 973.94489    | 28.58943     | 91.1759 |

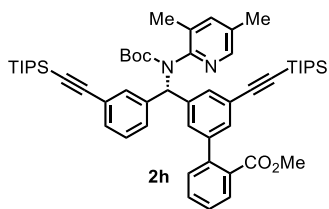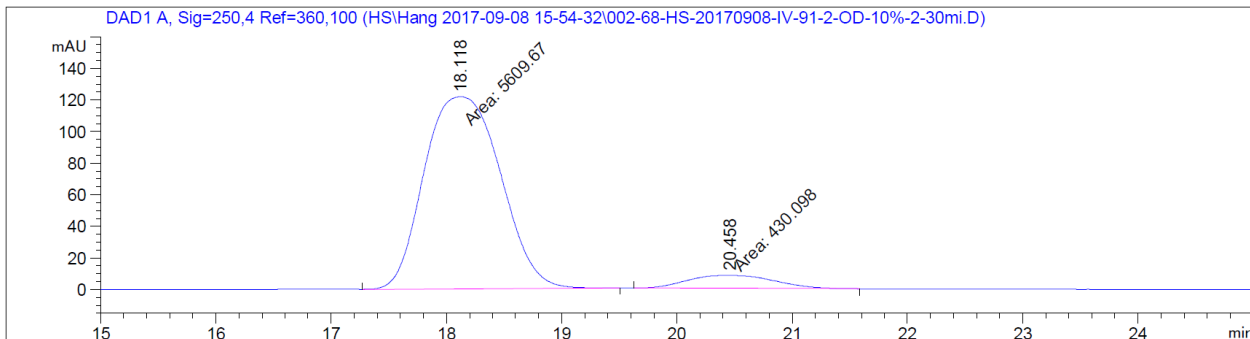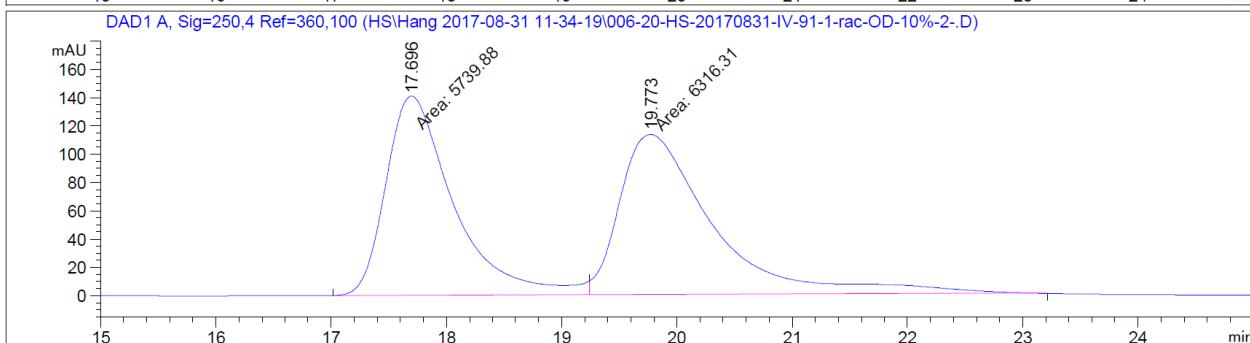

Signal 1: DAD1 A, Sig=250,4 Ref=360,100

| Peak # | RetTime [min] | Type | Width [min] | Area [mAU*s] | Height [mAU] | Area %  |
|--------|---------------|------|-------------|--------------|--------------|---------|
| 1      | 18.118        | MM   | 0.7676      | 5609.67383   | 121.80787    | 92.8789 |
| 2      | 20.458        | MM   | 0.8680      | 430.09839    | 8.25843      | 7.1211  |

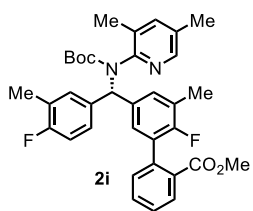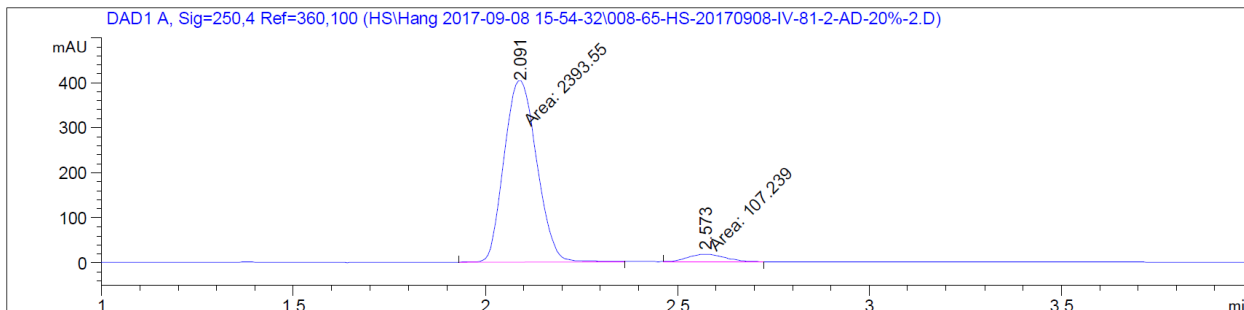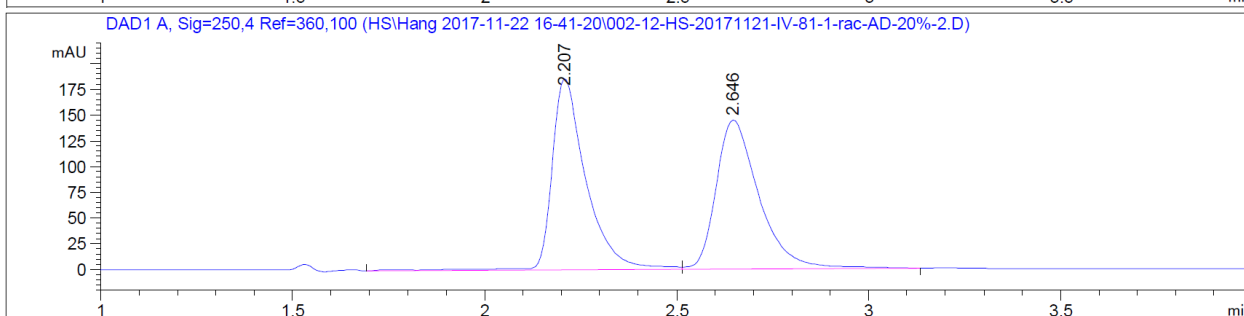

Signal 1: DAD1 A, Sig=250,4 Ref=360,100

| Peak # | RetTime [min] | Type | Width [min] | Area [mAU*s] | Height [mAU] | Area %  |
|--------|---------------|------|-------------|--------------|--------------|---------|
| 1      | 2.091         | MM   | 0.0985      | 2393.55249   | 404.92963    | 95.7118 |
| 2      | 2.573         | MM   | 0.1089      | 107.23945    | 16.41767     | 4.2882  |

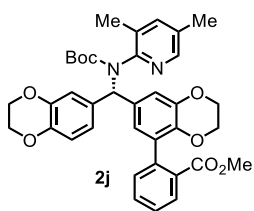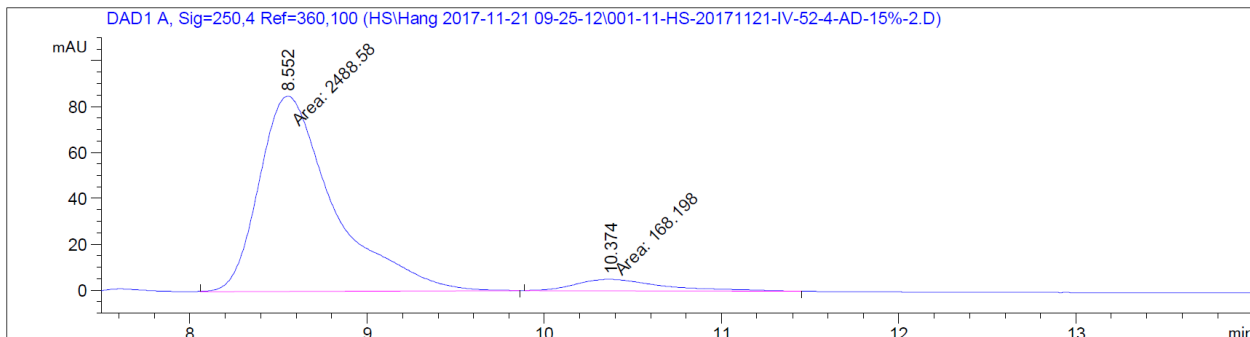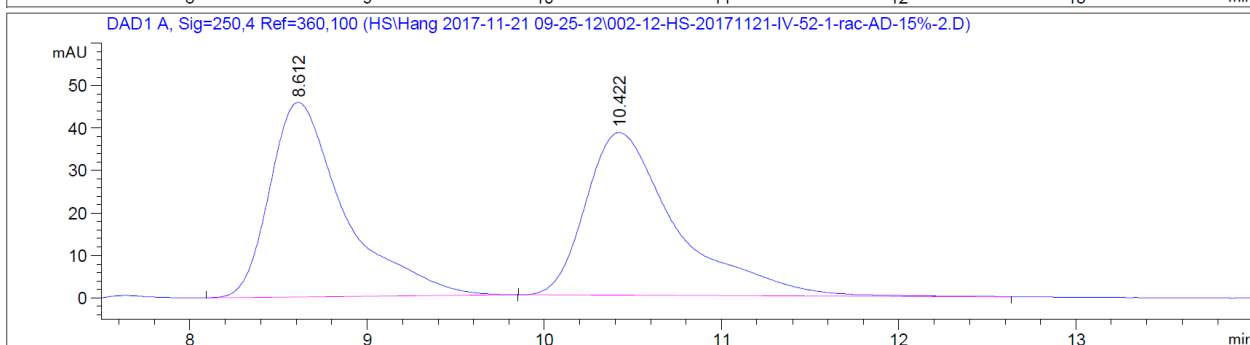

Signal 1: DAD1 A, Sig=250,4 Ref=360,100

| Peak # | RetTime [min] | Type | Width [min] | Area [mAU*s] | Height [mAU] | Area %  |
|--------|---------------|------|-------------|--------------|--------------|---------|
| 1      | 8.552         | MM   | 0.4877      | 2488.58325   | 85.05038     | 93.6691 |
| 2      | 10.374        | MM   | 0.5628      | 168.19827    | 4.98111      | 6.3309  |

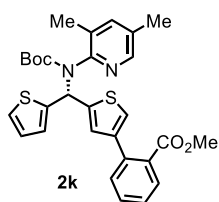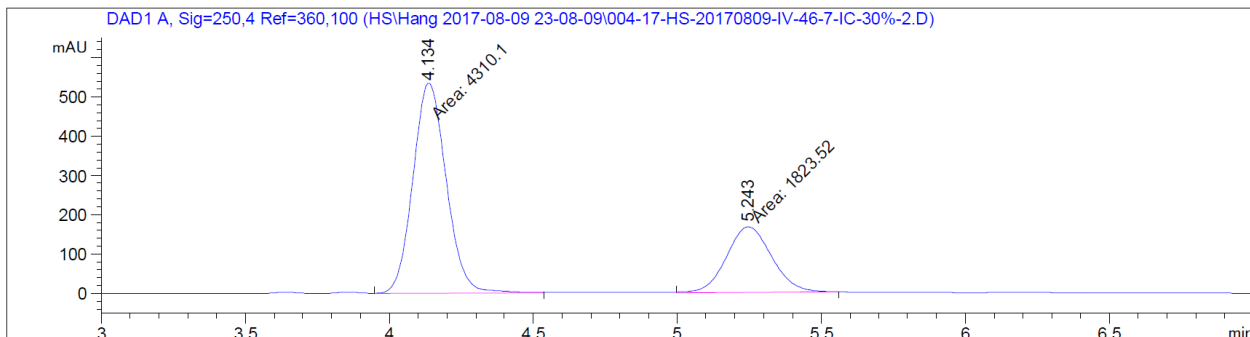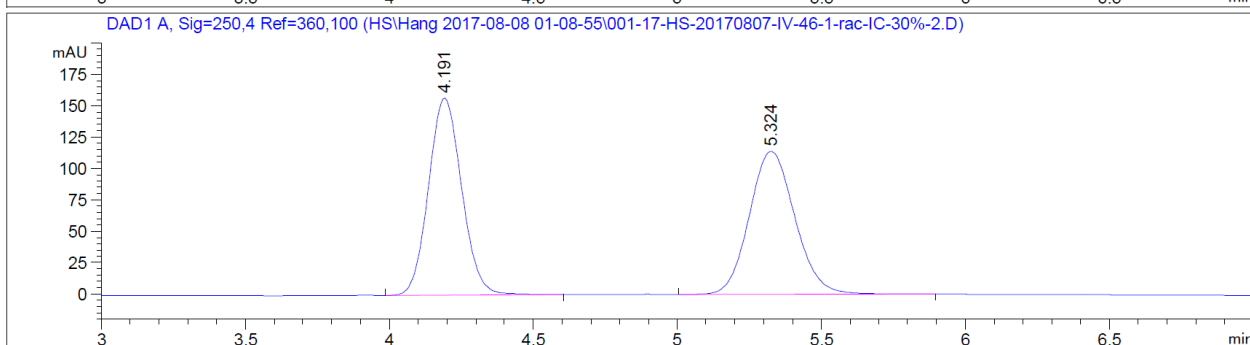

Signal 1: DAD1 A, Sig=250,4 Ref=360,100

| Peak # | RetTime [min] | Type | Width [min] | Area [mAU*s] | Height [mAU] | Area %  |
|--------|---------------|------|-------------|--------------|--------------|---------|
| 1      | 4.134         | MM   | 0.1341      | 4310.09961   | 535.67480    | 70.2700 |
| 2      | 5.243         | MM   | 0.1816      | 1823.52490   | 167.33965    | 29.7300 |

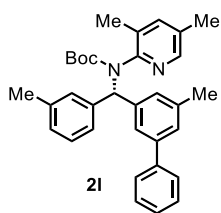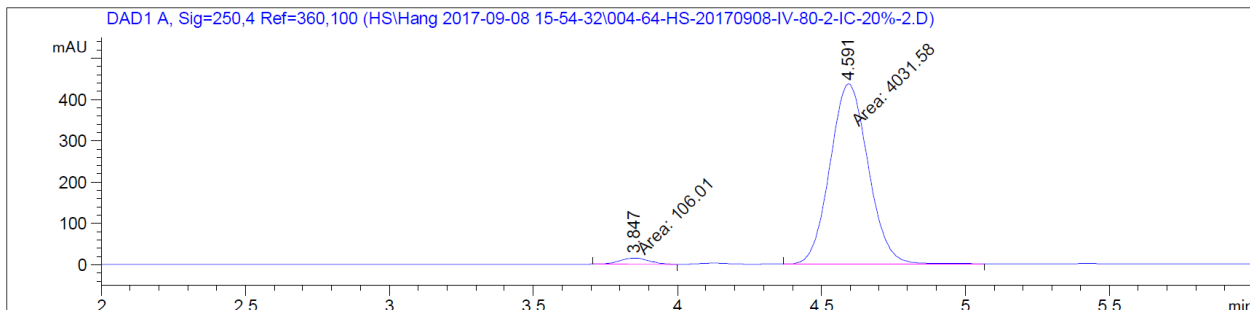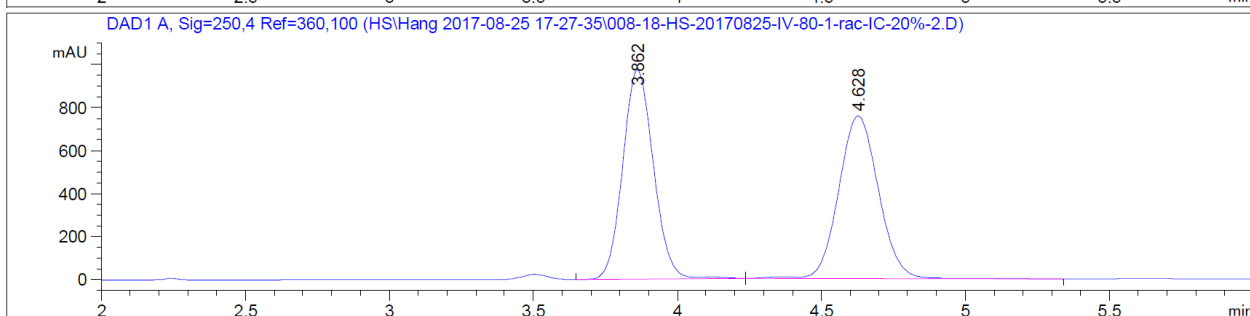

Signal 1: DAD1 A, Sig=250,4 Ref=360,100

| Peak # | RetTime [min] | Type | Width [min] | Area [mAU*s] | Height [mAU] | Area %  |
|--------|---------------|------|-------------|--------------|--------------|---------|
| 1      | 3.847         | MM   | 0.1168      | 106.01046    | 15.12457     | 2.5621  |
| 2      | 4.591         | MM   | 0.1537      | 4031.58008   | 437.29309    | 97.4379 |

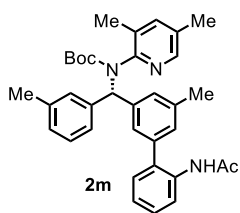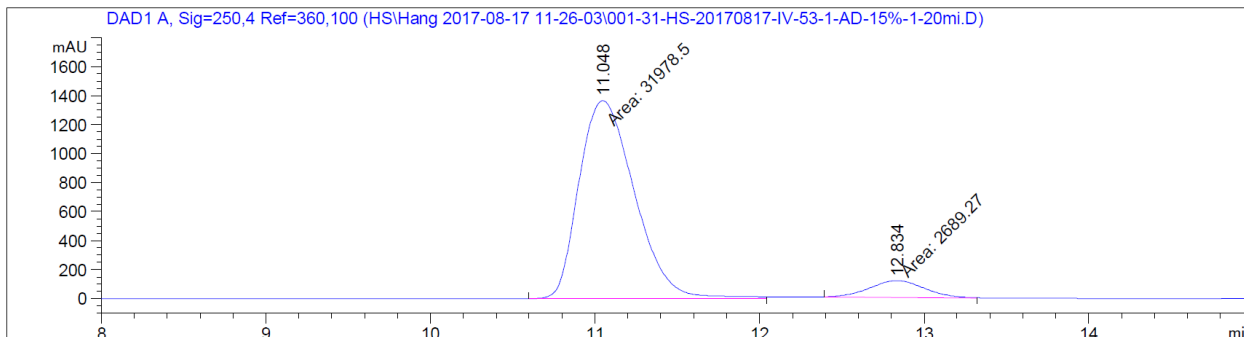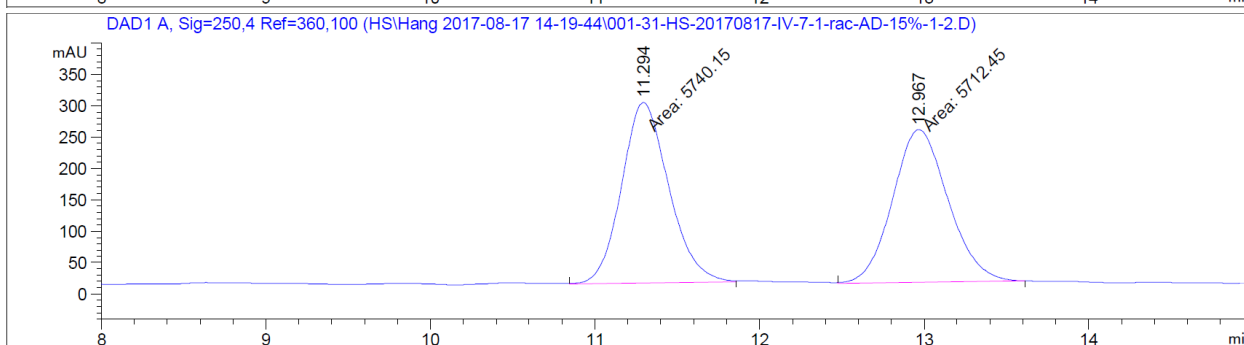

Signal 1: DAD1 A, Sig=250,4 Ref=360,100

| Peak # | RetTime [min] | Type | Width [min] | Area [mAU*s] | Height [mAU] | Area %  |
|--------|---------------|------|-------------|--------------|--------------|---------|
| 1      | 11.048        | MM   | 0.3901      | 3.19785e4    | 1366.14307   | 92.2428 |
| 2      | 12.834        | MM   | 0.3848      | 2689.26538   | 116.47205    | 7.7572  |



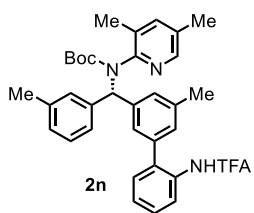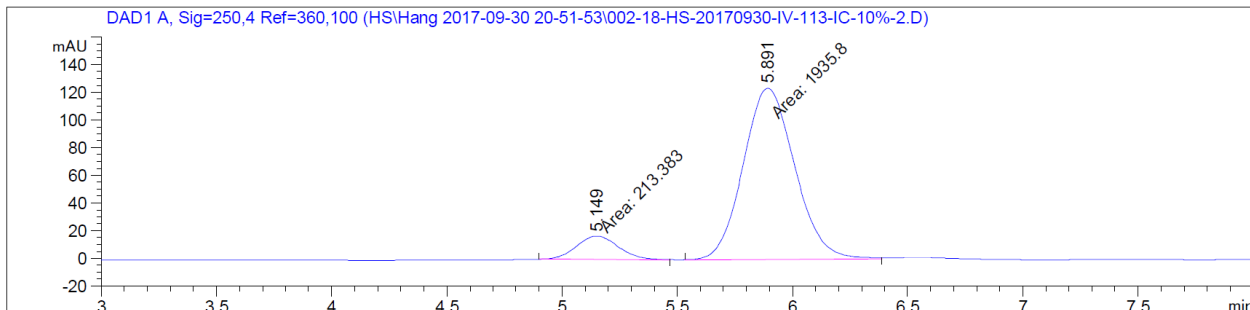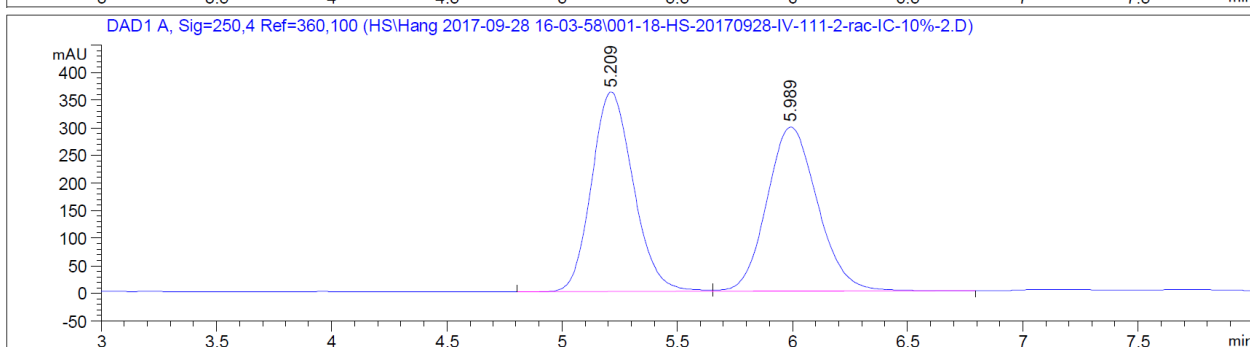

Signal 1: DAD1 A, Sig=250,4 Ref=360,100

| Peak # | RetTime [min] | Type | Width [min] | Area [mAU*s] | Height [mAU] | Area %  |
|--------|---------------|------|-------------|--------------|--------------|---------|
| 1      | 5.149         | MM   | 0.2102      | 213.38335    | 16.92092     | 9.9286  |
| 2      | 5.891         | MM   | 0.2604      | 1935.79797   | 123.88663    | 90.0714 |

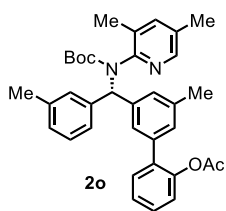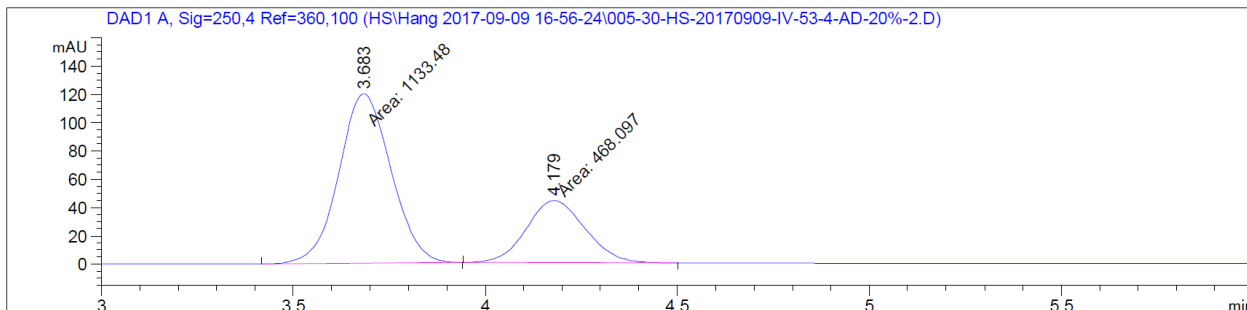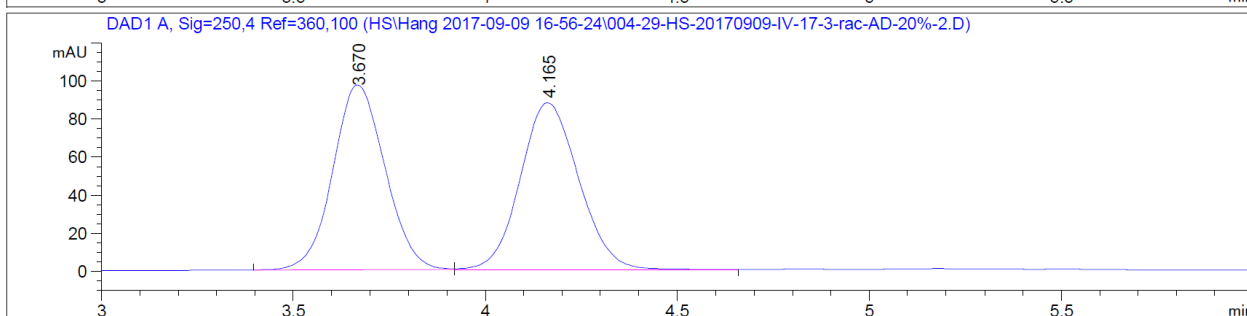

Signal 1: DAD1 A, Sig=250,4 Ref=360,100

| Peak # | RetTime [min] | Type | Width [min] | Area [mAU*s] | Height [mAU] | Area %  |
|--------|---------------|------|-------------|--------------|--------------|---------|
| 1      | 3.683         | MM   | 0.1574      | 1133.48279   | 120.01421    | 70.7728 |
| 2      | 4.179         | MM   | 0.1775      | 468.09714    | 43.96405     | 29.2272 |

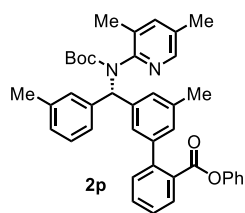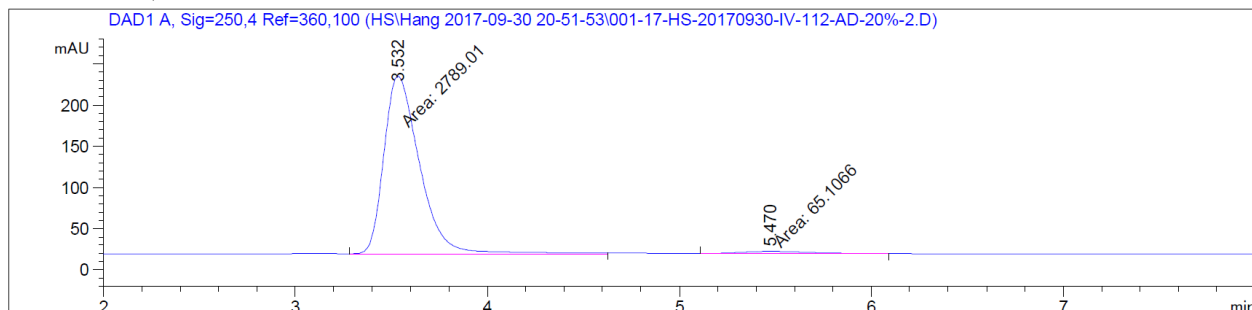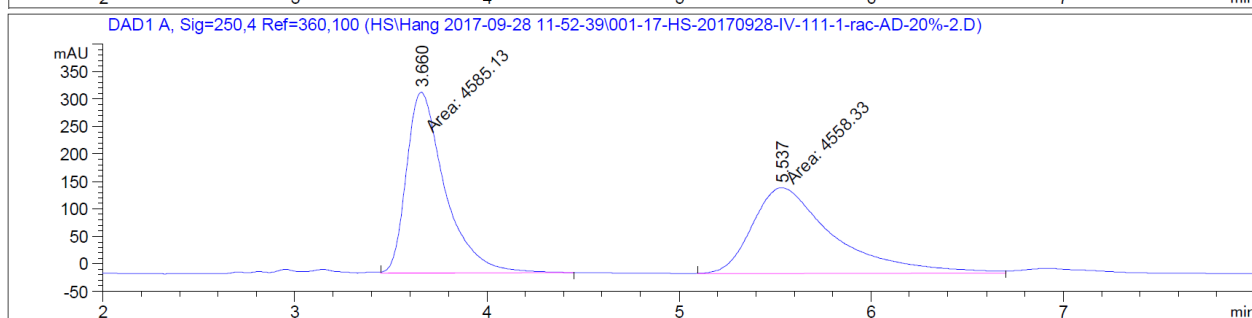

Signal 1: DAD1 A, Sig=250,4 Ref=360,100

| Peak # | RetTime [min] | Type | Width [min] | Area [mAU*s] | Height [mAU] | Area %  |
|--------|---------------|------|-------------|--------------|--------------|---------|
| 1      | 3.532         | MM   | 0.2156      | 2789.01172   | 215.64548    | 97.7189 |
| 2      | 5.470         | MM   | 0.4285      | 65.10661     | 2.53228      | 2.2811  |

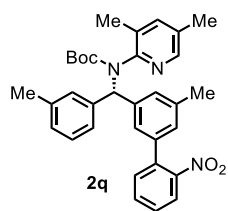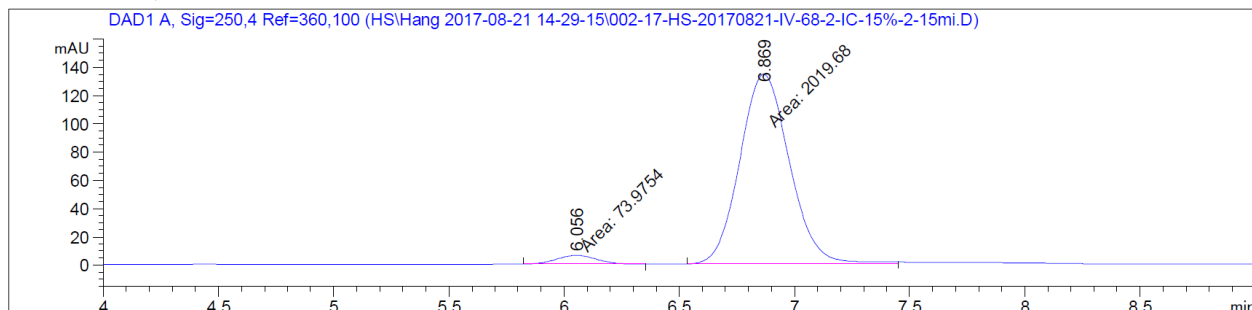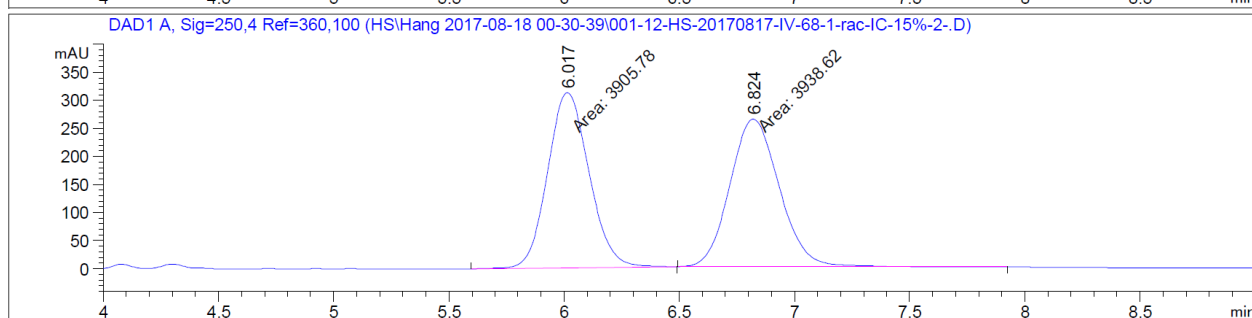

Signal 1: DAD1 A, Sig=250,4 Ref=360,100

| Peak # | RetTime [min] | Type | Width [min] | Area [mAU*s] | Height [mAU] | Area %  |
|--------|---------------|------|-------------|--------------|--------------|---------|
| 1      | 6.056         | MM   | 0.2007      | 73.97545     | 6.14264      | 3.5333  |
| 2      | 6.869         | MM   | 0.2503      | 2019.68396   | 134.47147    | 96.4667 |

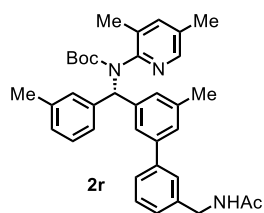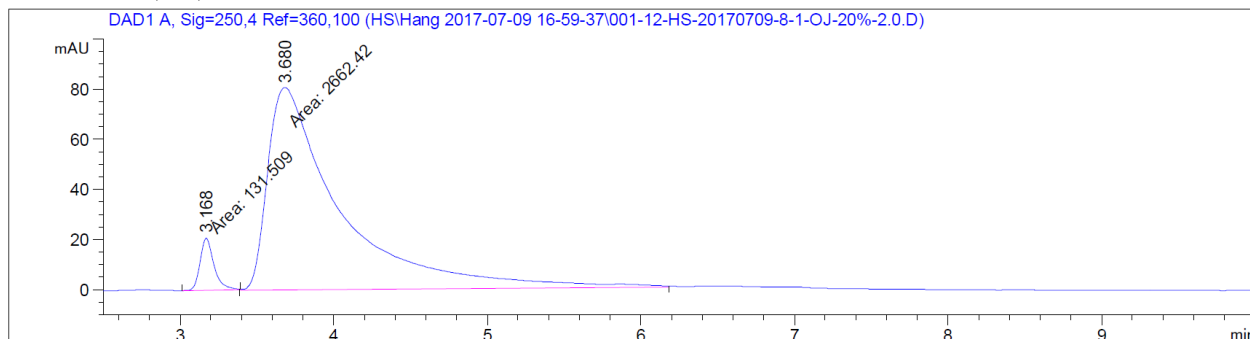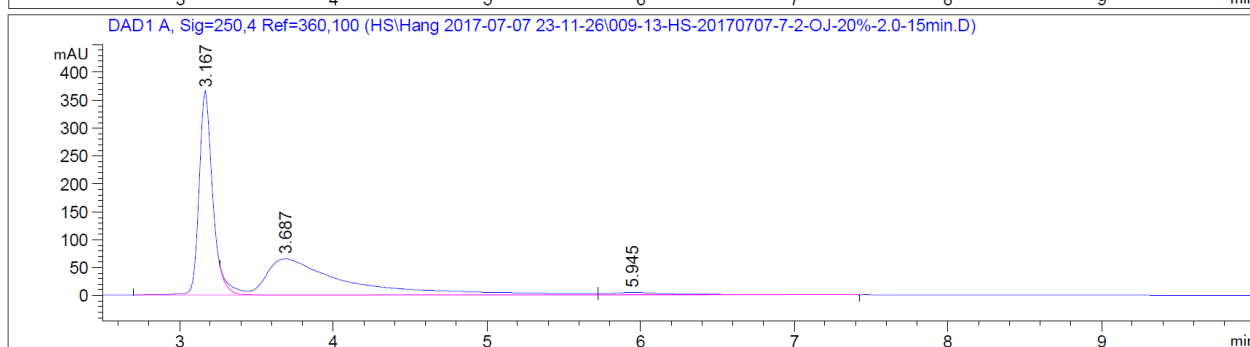

Signal 1: DAD1 A, Sig=250,4 Ref=360,100

| Peak # | RetTime [min] | Type | Width [min] | Area [mAU*s] | Height [mAU] | Area %  |
|--------|---------------|------|-------------|--------------|--------------|---------|
| 1      | 3.168         | MM   | 0.1047      | 131.50948    | 20.93688     | 4.7070  |
| 2      | 3.680         | MM   | 0.5499      | 2662.41602   | 80.69624     | 95.2930 |

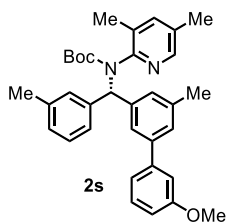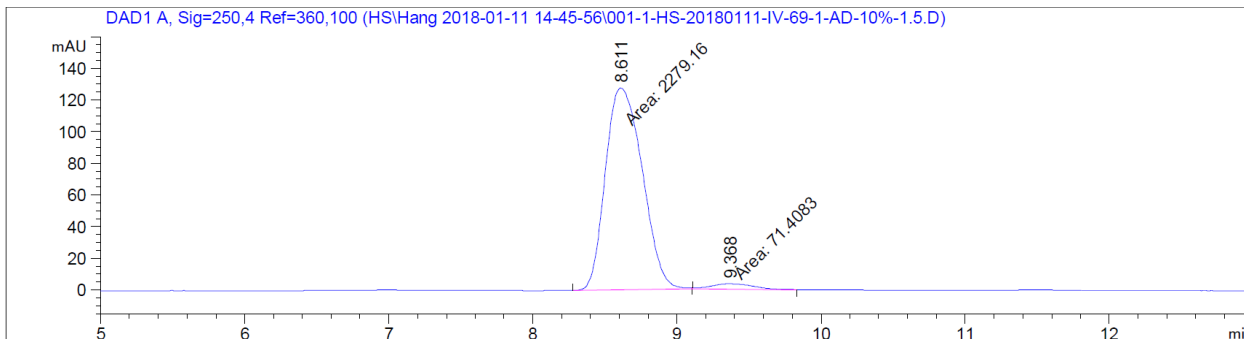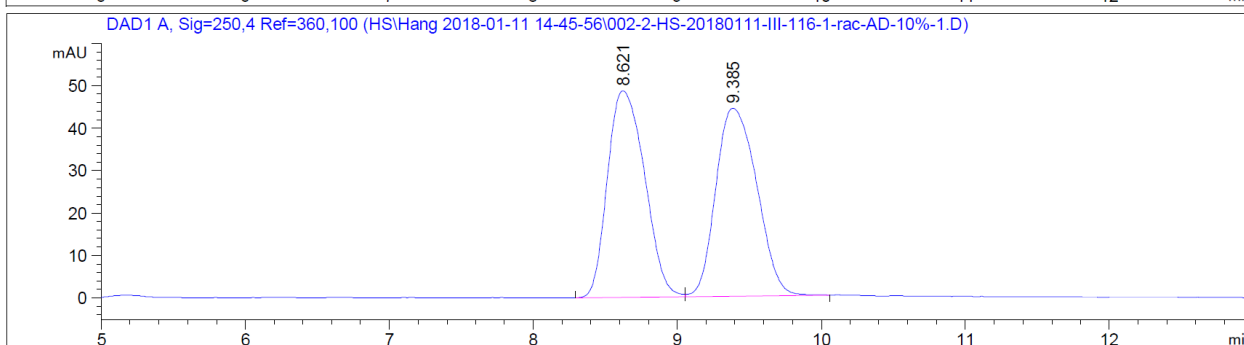

Signal 1: DAD1 A, Sig=250,4 Ref=360,100

| Peak # | RetTime [min] | Type | Width [min] | Area [mAU*s] | Height [mAU] | Area %  |
|--------|---------------|------|-------------|--------------|--------------|---------|
| 1      | 8.611         | MM   | 0.2971      | 2279.16431   | 127.85472    | 96.9621 |
| 2      | 9.368         | MM   | 0.3410      | 71.40829     | 3.49040      | 3.0379  |

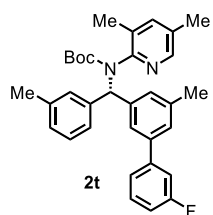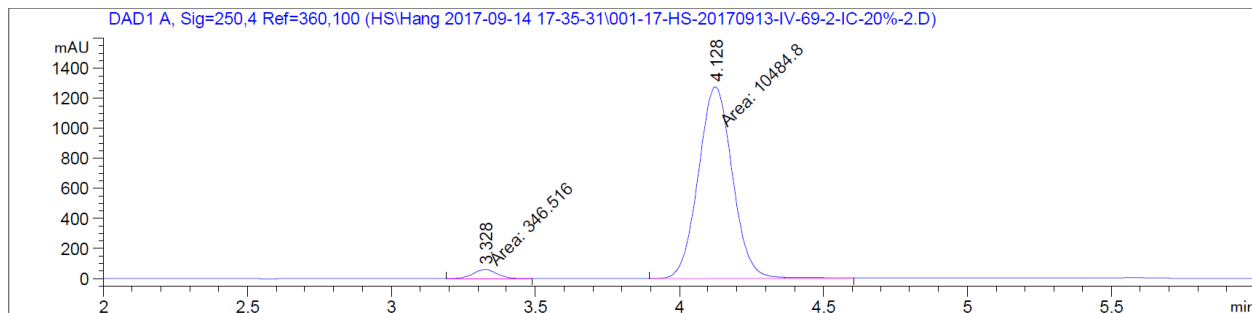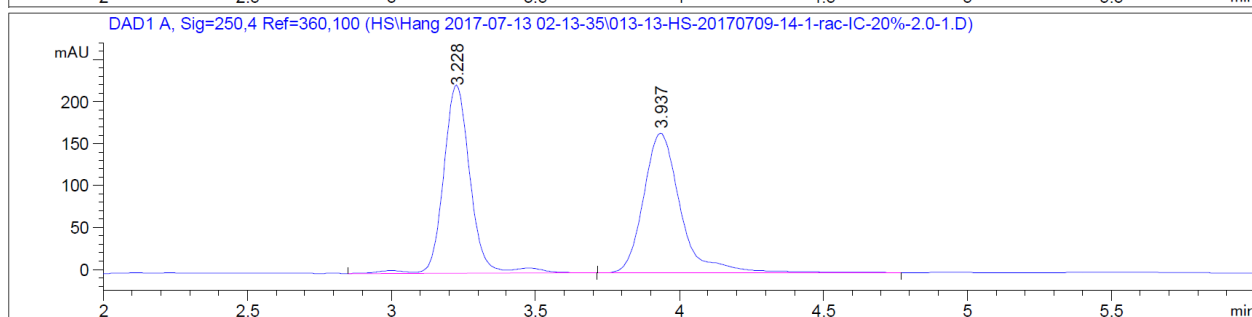

Signal 1: DAD1 A, Sig=250,4 Ref=360,100

| Peak # | RetTime [min] | Type | Width [min] | Area [mAU*s] | Height [mAU] | Area %  |
|--------|---------------|------|-------------|--------------|--------------|---------|
| 1      | 3.328         | MM   | 0.0959      | 346.51639    | 60.22383     | 3.1992  |
| 2      | 4.128         | MM   | 0.1368      | 1.04848e4    | 1277.26770   | 96.8008 |

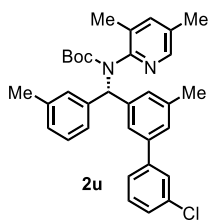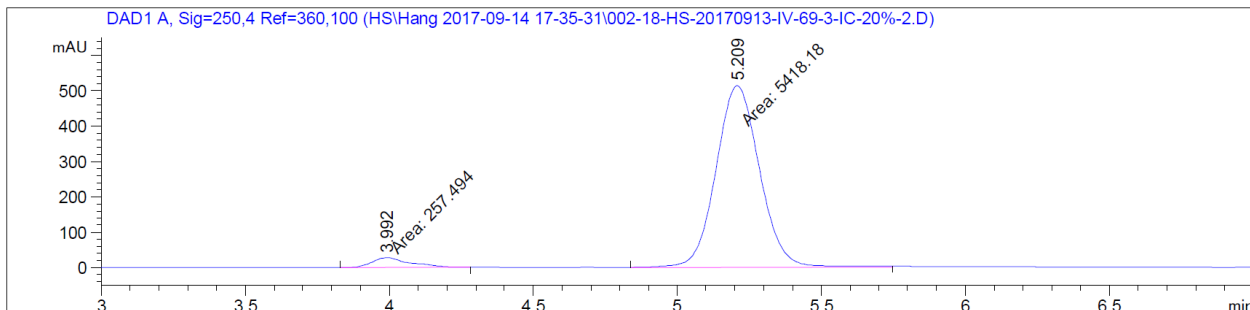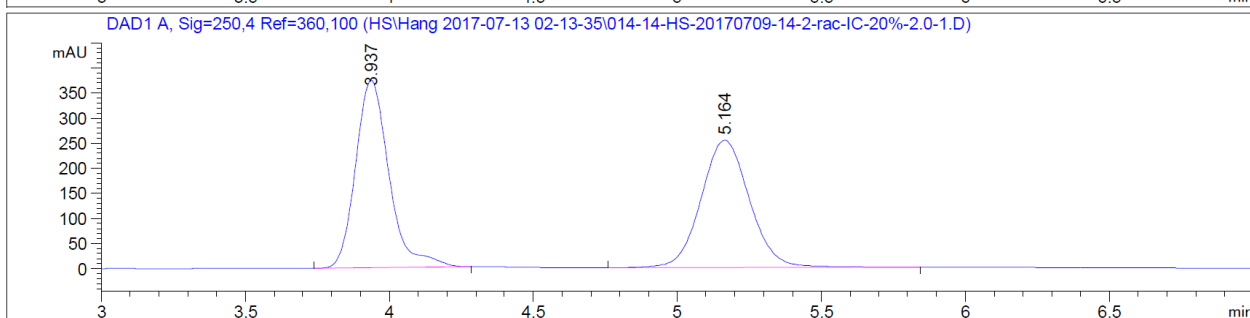

Signal 1: DAD1 A, Sig=250,4 Ref=360,100

| Peak # | RetTime [min] | Type | Width [min] | Area [mAU*s] | Height [mAU] | Area %  |
|--------|---------------|------|-------------|--------------|--------------|---------|
| 1      | 3.992         | MM   | 0.1538      | 257.49399    | 27.90685     | 4.5368  |
| 2      | 5.209         | MM   | 0.1756      | 5418.17627   | 514.14496    | 95.4632 |



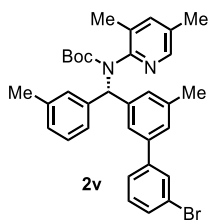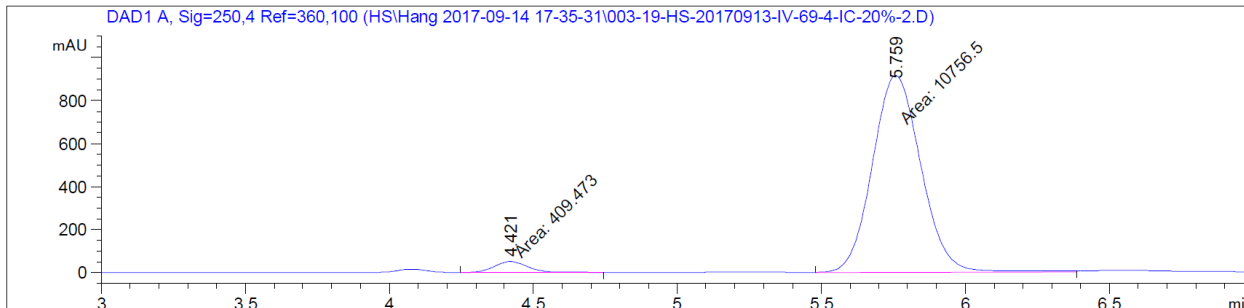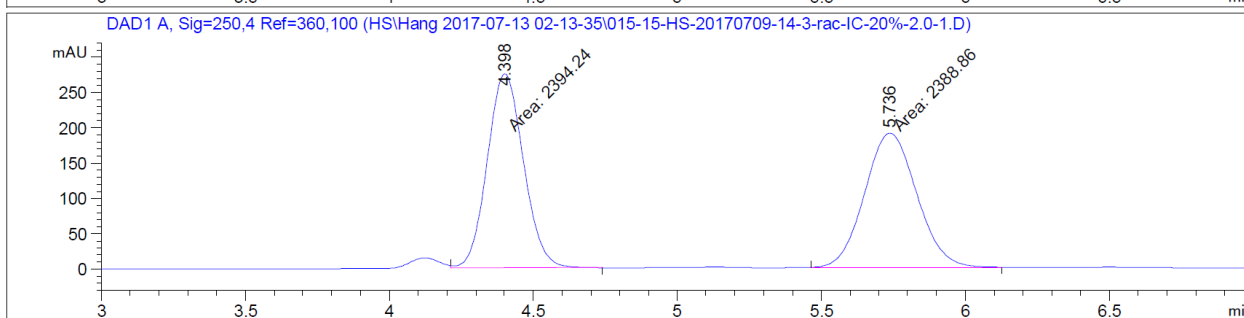

Signal 1: DAD1 A, Sig=250,4 Ref=360,100

| Peak # | RetTime [min] | Type | Width [min] | Area [mAU*s] | Height [mAU] | Area %  |
|--------|---------------|------|-------------|--------------|--------------|---------|
| 1      | 4.421         | MM   | 0.1356      | 409.47339    | 50.32362     | 3.6671  |
| 2      | 5.759         | MM   | 0.1956      | 1.07565e4    | 916.64673    | 96.3329 |

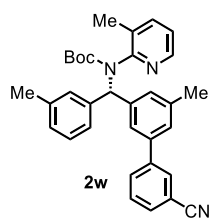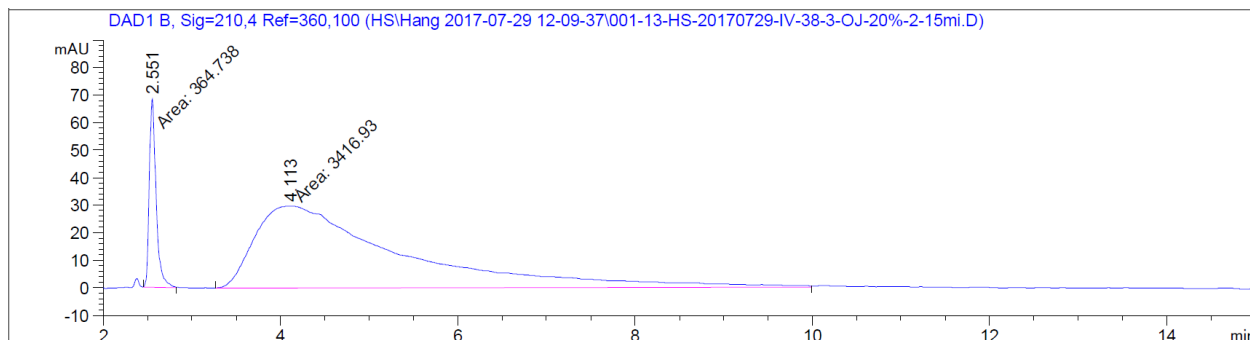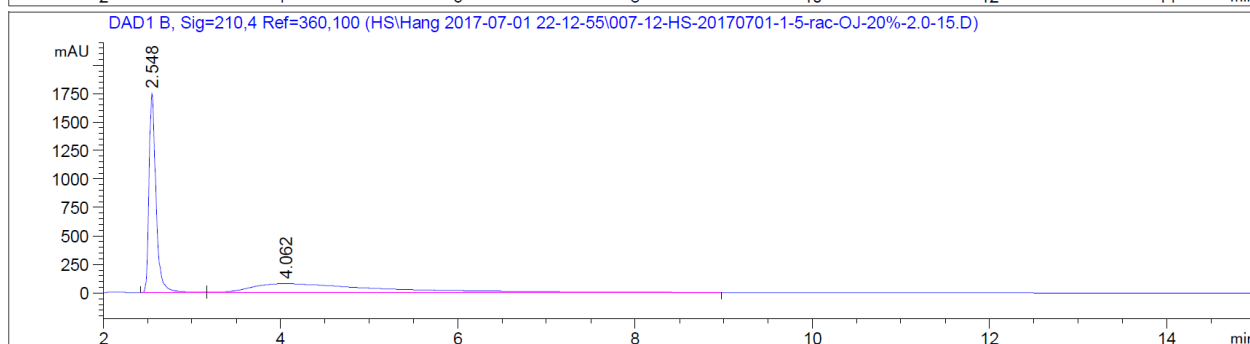

### Signal 2: DAD1 B, Sig=210,4 Ref=360,100

| Peak # | RetTime [min] | Type | Width [min] | Area [mAU*s] | Height [mAU] | Area %  |
|--------|---------------|------|-------------|--------------|--------------|---------|
| 1      | 2.551         | MM   | 0.0887      | 364.73767    | 68.51612     | 9.6449  |
| 2      | 4.113         | MM   | 1.9086      | 3416.92749   | 29.83876     | 90.3551 |

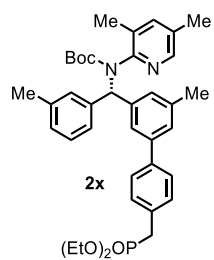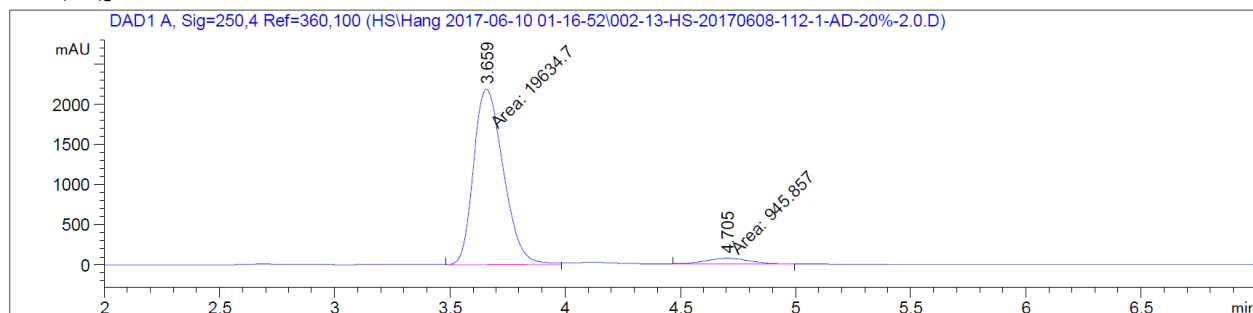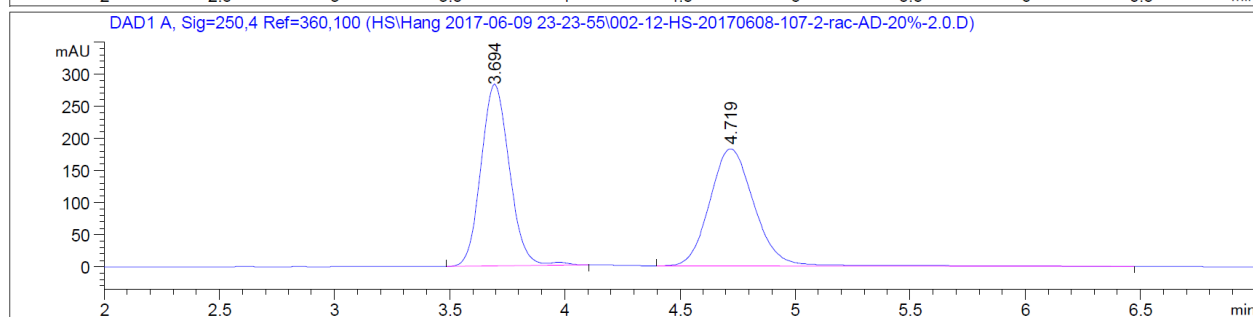

Signal 1: DAD1 A, Sig=250,4 Ref=360,100

| Peak # | RetTime [min] | Type | Width [min] | Area [mAU*s] | Height [mAU] | Area %  |
|--------|---------------|------|-------------|--------------|--------------|---------|
| 1      | 3.659         | MM   | 0.1497      | 1.96347e4    | 2185.73682   | 95.4041 |
| 2      | 4.705         | MM   | 0.2225      | 945.85706    | 70.85395     | 4.5959  |

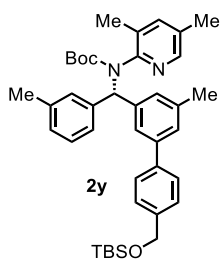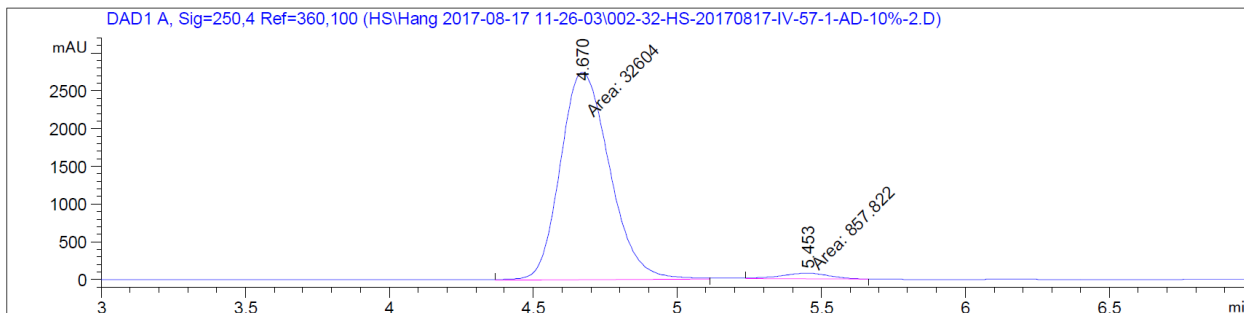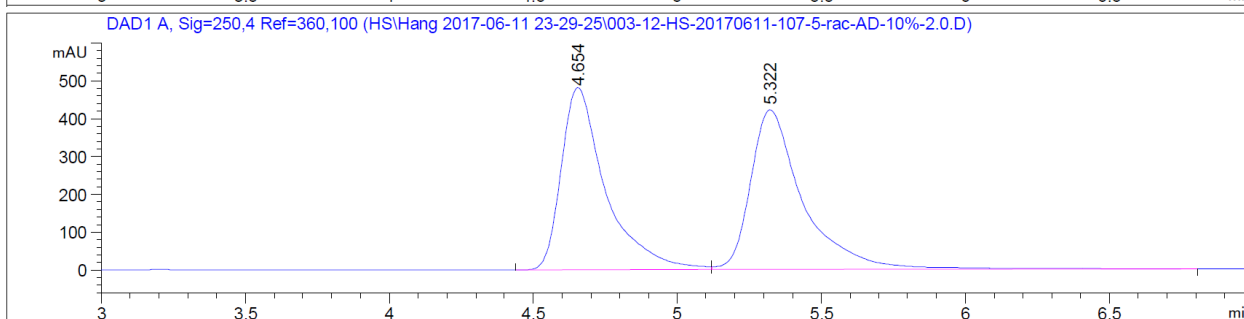

Signal 1: DAD1 A, Sig=250,4 Ref=360,100

| Peak # | RetTime [min] | Type | Width [min] | Area [mAU*s] | Height [mAU] | Area %  |
|--------|---------------|------|-------------|--------------|--------------|---------|
| 1      | 4.670         | MM   | 0.1980      | 3.26040e4    | 2744.02490   | 97.4364 |
| 2      | 5.453         | MM   | 0.1902      | 857.82245    | 75.18507     | 2.5636  |

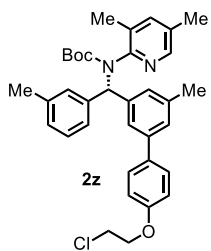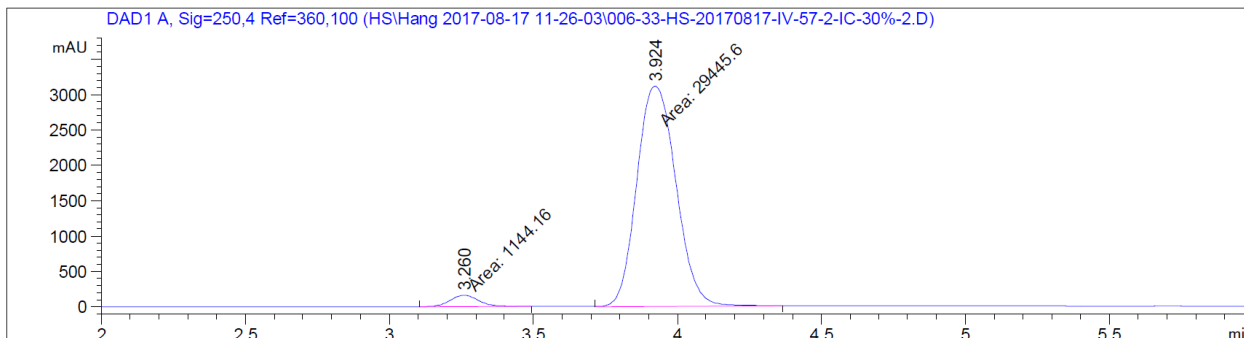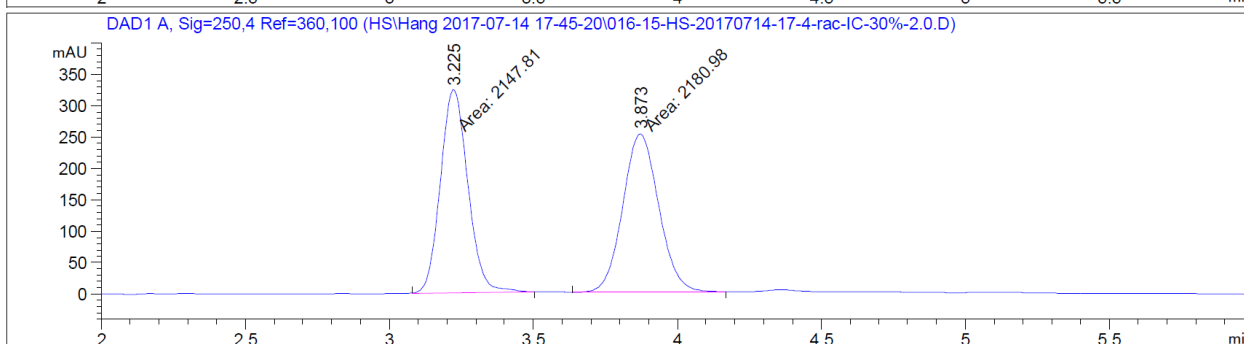

Signal 1: DAD1 A, Sig=250,4 Ref=360,100

| Peak # | RetTime [min] | Type | Width [min] | Area [mAU*s] | Height [mAU] | Area %  |
|--------|---------------|------|-------------|--------------|--------------|---------|
| 1      | 3.260         | MM   | 0.1165      | 1144.15857   | 163.68040    | 3.7403  |
| 2      | 3.924         | MM   | 0.1576      | 2.94456e4    | 3114.60840   | 96.2597 |

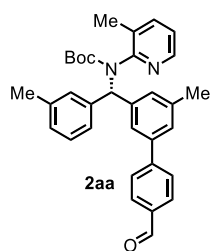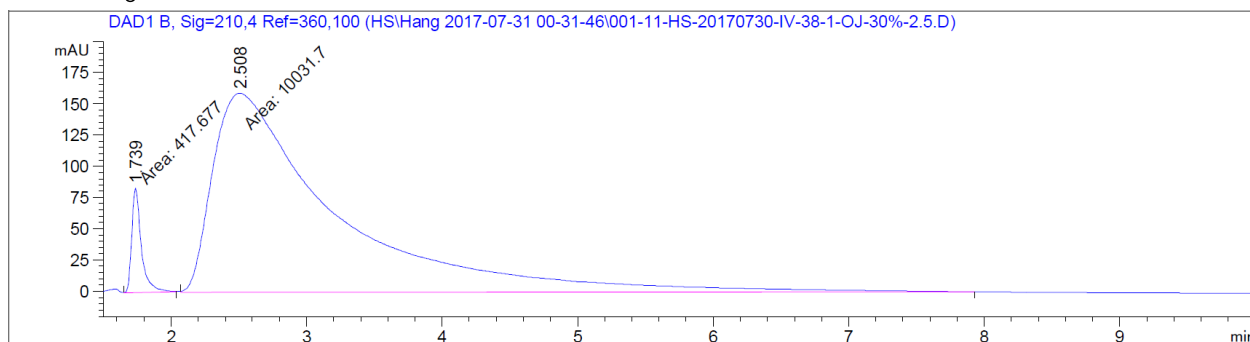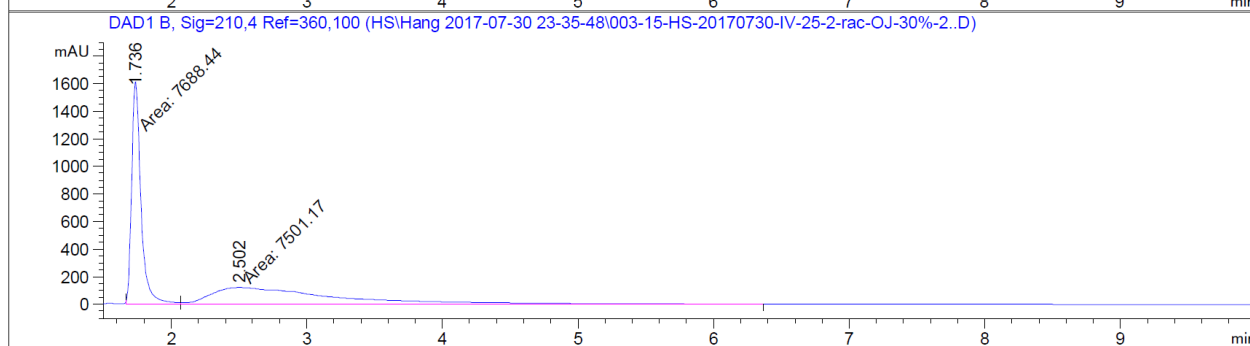

Signal 2: DAD1 B, Sig=210,4 Ref=360,100

| Peak # | RetTime [min] | Type | Width [min] | Area [mAU*s] | Height [mAU] | Area %  |
|--------|---------------|------|-------------|--------------|--------------|---------|
| 1      | 1.739         | MM   | 0.0830      | 417.67682    | 83.85143     | 3.9971  |
| 2      | 2.508         | MM   | 1.0507      | 1.00317e4    | 159.12238    | 96.0029 |

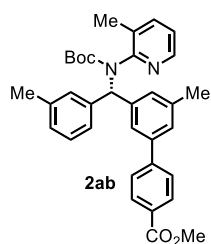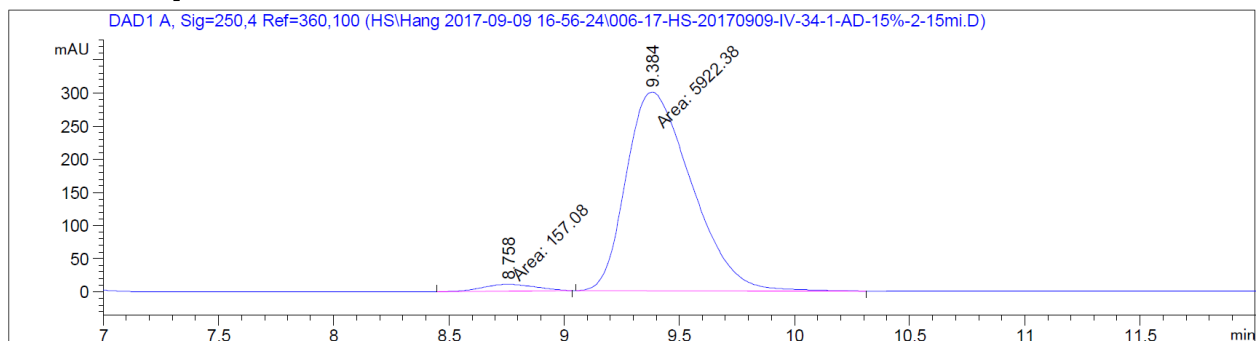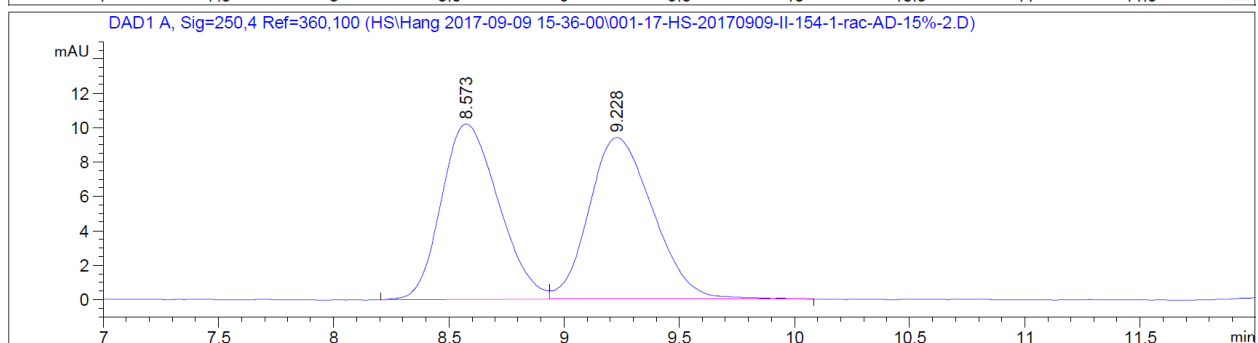

Signal 1: DAD1 A, Sig=250,4 Ref=360,100

| Peak # | RetTime [min] | Type | Width [min] | Area [mAU*s] | Height [mAU] | Area %  |
|--------|---------------|------|-------------|--------------|--------------|---------|
| 1      | 8.758         | MM   | 0.2614      | 157.07967    | 10.01671     | 2.5838  |
| 2      | 9.384         | MM   | 0.3292      | 5922.38379   | 299.85886    | 97.4162 |

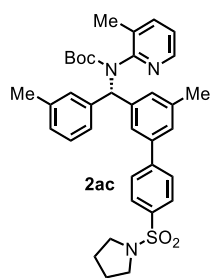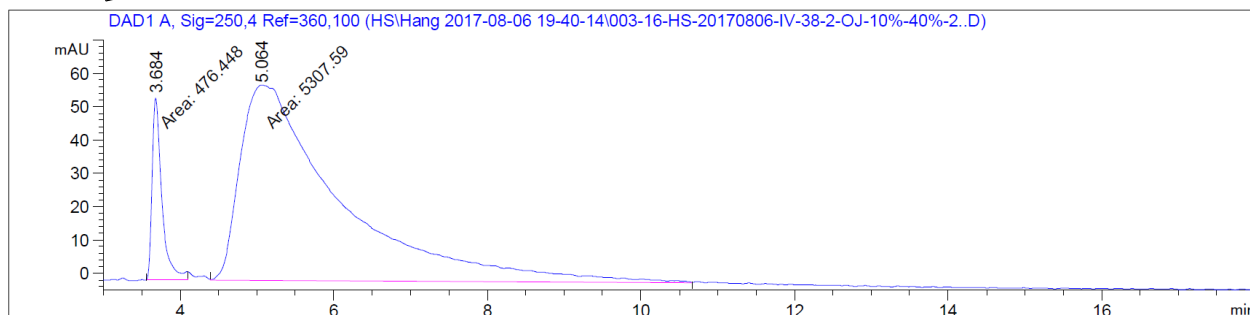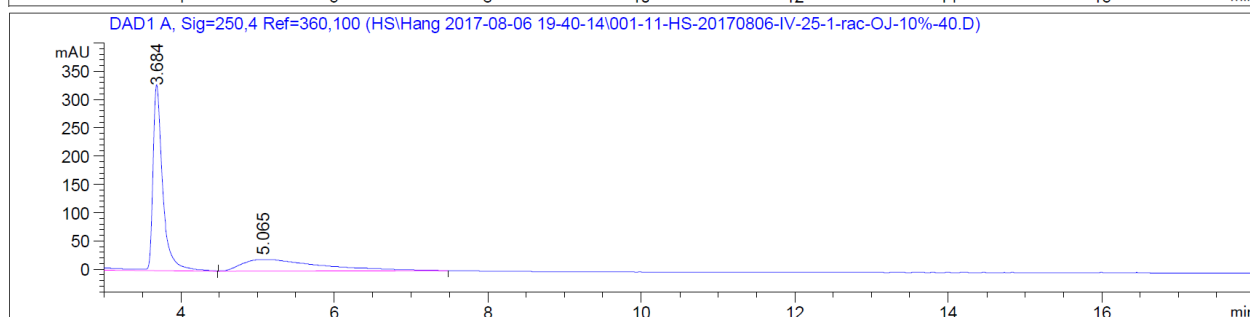

Signal 1: DAD1 A, Sig=250,4 Ref=360,100

| Peak # | RetTime [min] | Type | Width [min] | Area [mAU*s] | Height [mAU] | Area %  |
|--------|---------------|------|-------------|--------------|--------------|---------|
| 1      | 3.684         | MM   | 0.1455      | 476.44806    | 54.58828     | 8.2373  |
| 2      | 5.064         | MM   | 1.5084      | 5307.59277   | 58.64465     | 91.7627 |



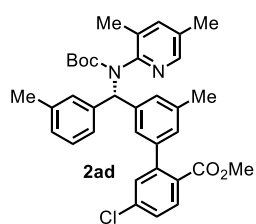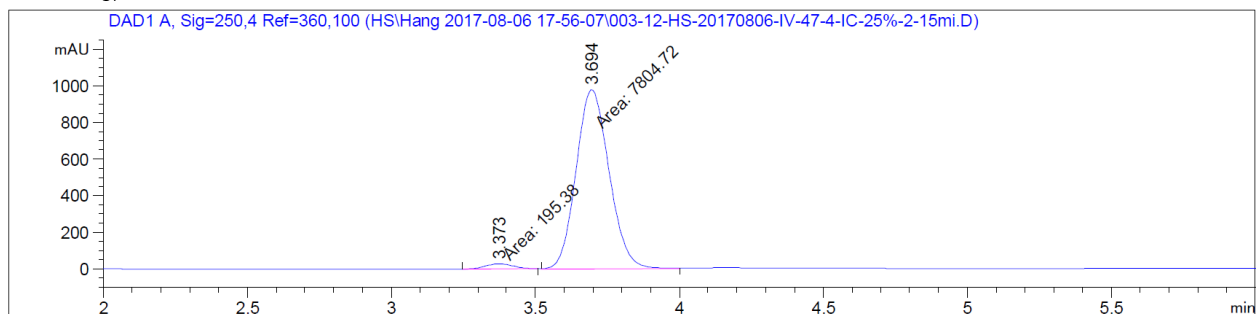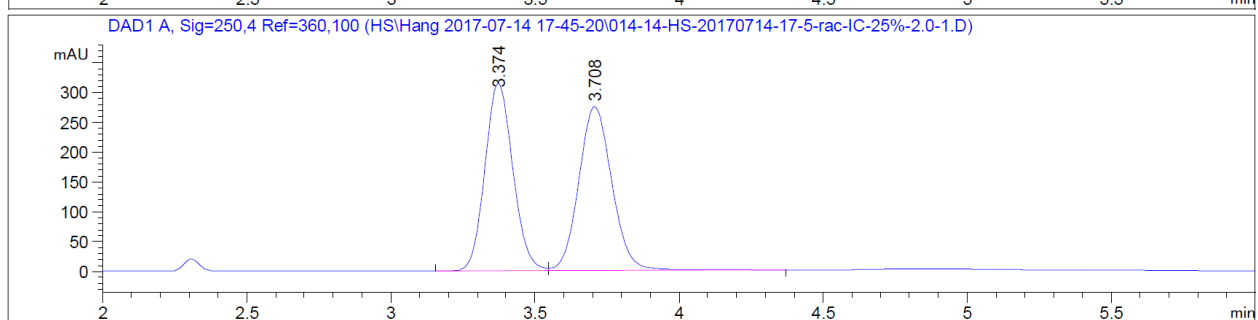

Signal 1: DAD1 A, Sig=250,4 Ref=360,100

| Peak # | RetTime [min] | Type | Width [min] | Area [mAU*s] | Height [mAU] | Area %  |
|--------|---------------|------|-------------|--------------|--------------|---------|
| 1      | 3.373         | MM   | 0.1123      | 195.37979    | 28.99484     | 2.4422  |
| 2      | 3.694         | MM   | 0.1328      | 7804.72314   | 979.33472    | 97.5578 |

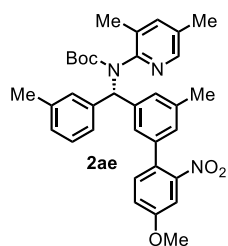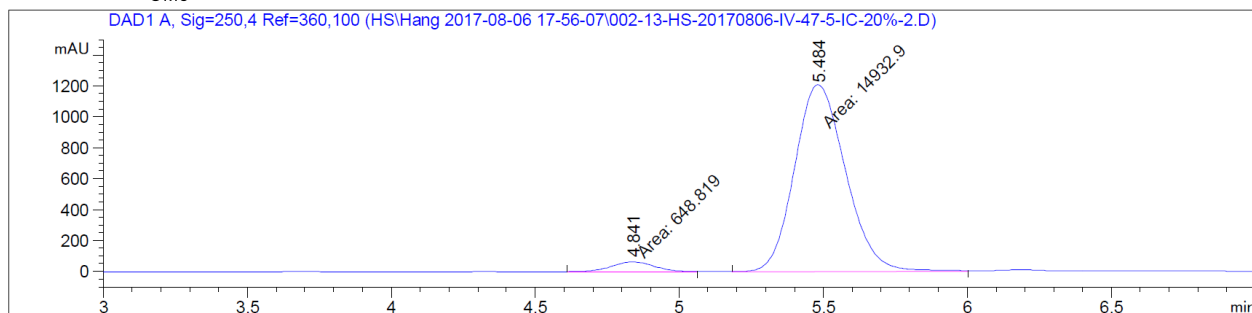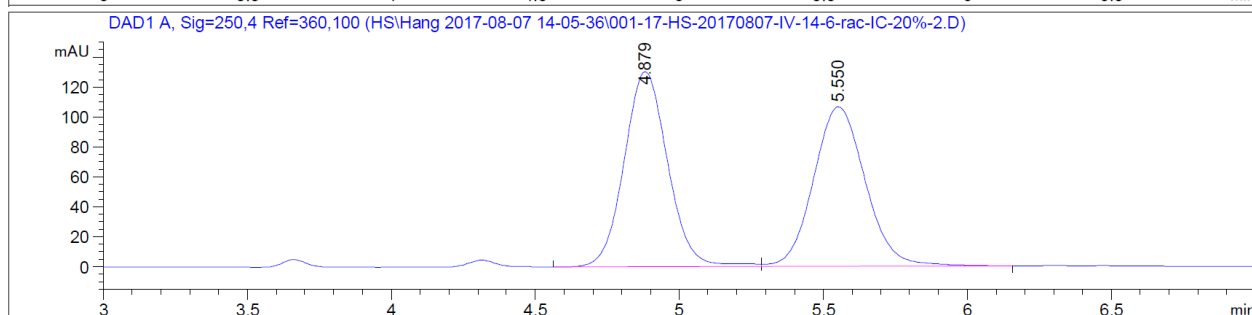

Signal 1: DAD1 A, Sig=250,4 Ref=360,100

| Peak # | RetTime [min] | Type | Width [min] | Area [mAU*s] | Height [mAU] | Area %  |
|--------|---------------|------|-------------|--------------|--------------|---------|
| 1      | 4.841         | MM   | 0.1717      | 648.81927    | 62.96412     | 4.1640  |
| 2      | 5.484         | MM   | 0.2056      | 1.49329e4    | 1210.25586   | 95.8360 |

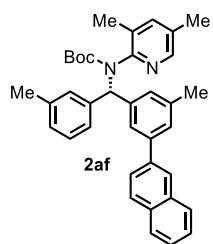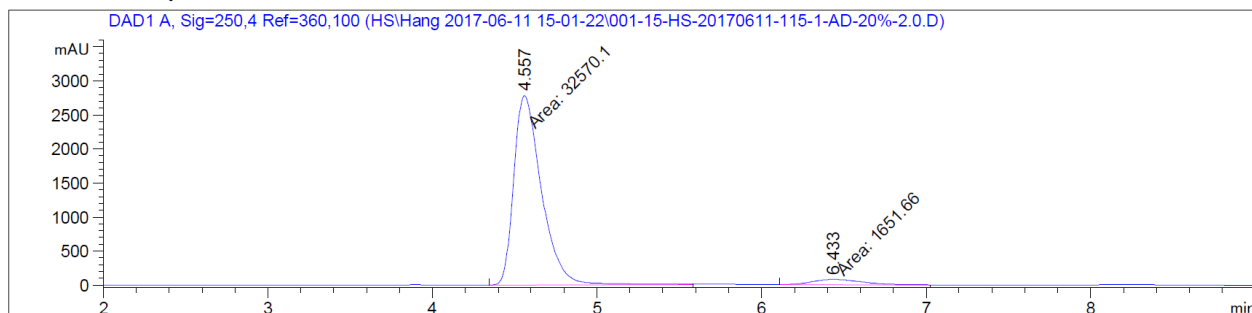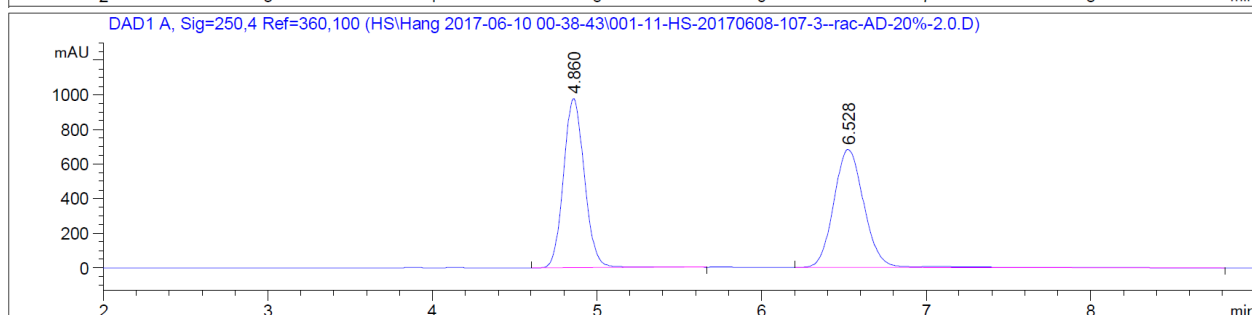

Signal 1: DAD1 A, Sig=250,4 Ref=360,100

| Peak # | RetTime [min] | Type | Width [min] | Area [mAU*s] | Height [mAU] | Area %  |
|--------|---------------|------|-------------|--------------|--------------|---------|
| 1      | 4.557         | MM   | 0.1952      | 3.25701e4    | 2781.44775   | 95.1737 |
| 2      | 6.433         | MM   | 0.3541      | 1651.65894   | 77.74711     | 4.8263  |

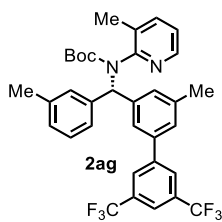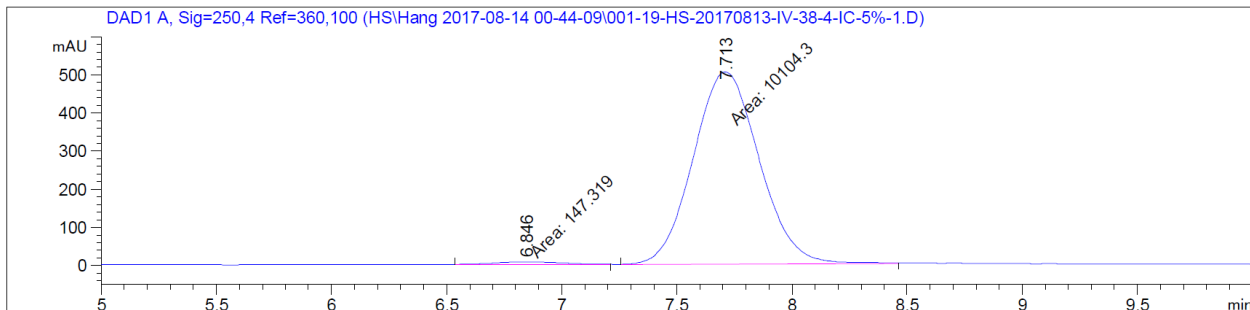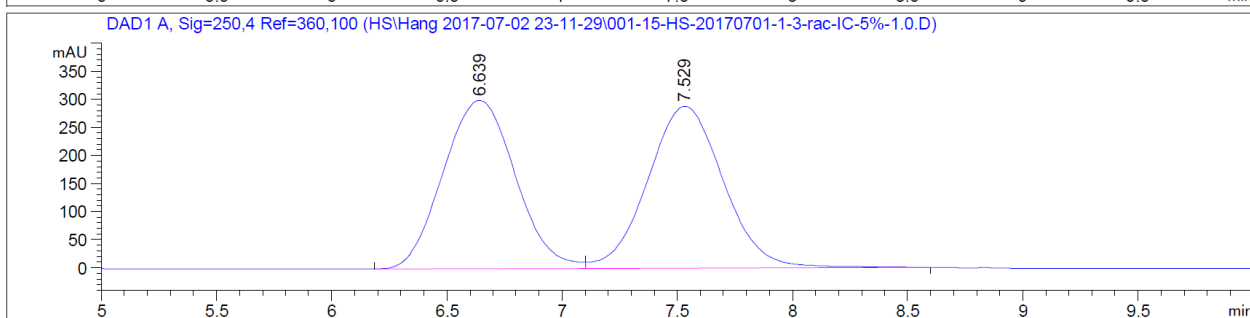

Signal 1: DAD1 A, Sig=250,4 Ref=360,100

| Peak # | RetTime [min] | Type | Width [min] | Area [mAU*s] | Height [mAU] | Area %  |
|--------|---------------|------|-------------|--------------|--------------|---------|
| 1      | 6.846         | MM   | 0.3360      | 147.31938    | 7.30824      | 1.4370  |
| 2      | 7.713         | MM   | 0.3329      | 1.01043e4    | 505.91608    | 98.5630 |

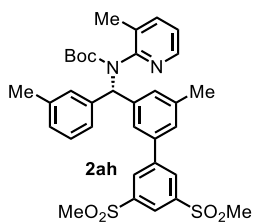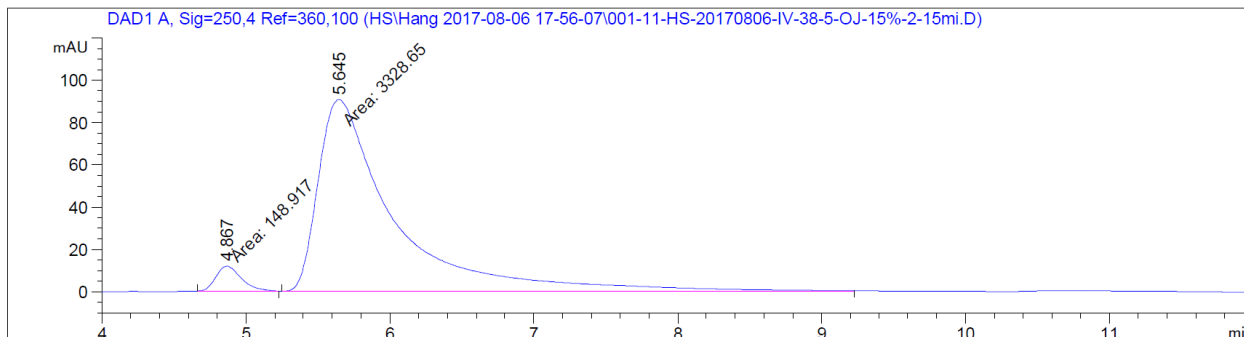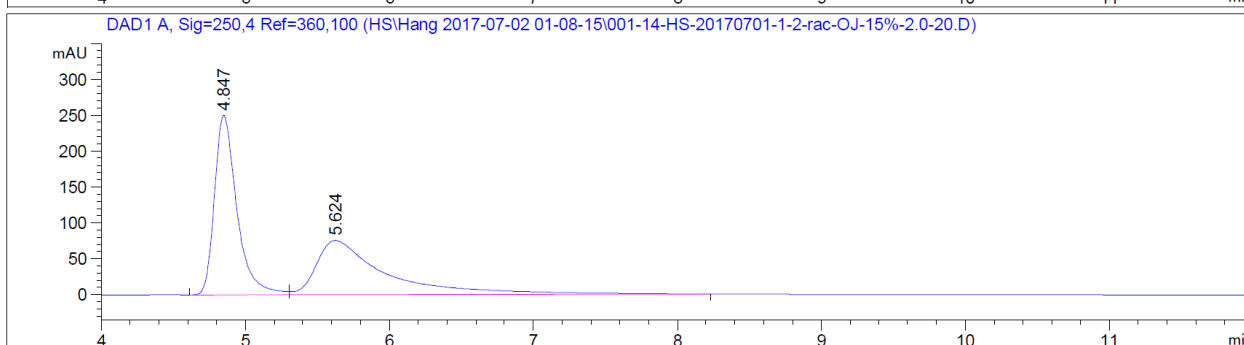

Signal 1: DAD1 A, Sig=250,4 Ref=360,100

| Peak # | RetTime [min] | Type | Width [min] | Area [mAU*s] | Height [mAU] | Area %  |
|--------|---------------|------|-------------|--------------|--------------|---------|
| 1      | 4.867         | MM   | 0.2089      | 148.91724    | 11.88122     | 4.2822  |
| 2      | 5.645         | MM   | 0.6124      | 3328.65210   | 90.58678     | 95.7178 |

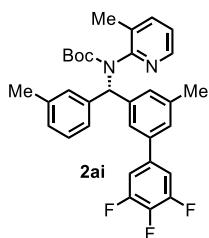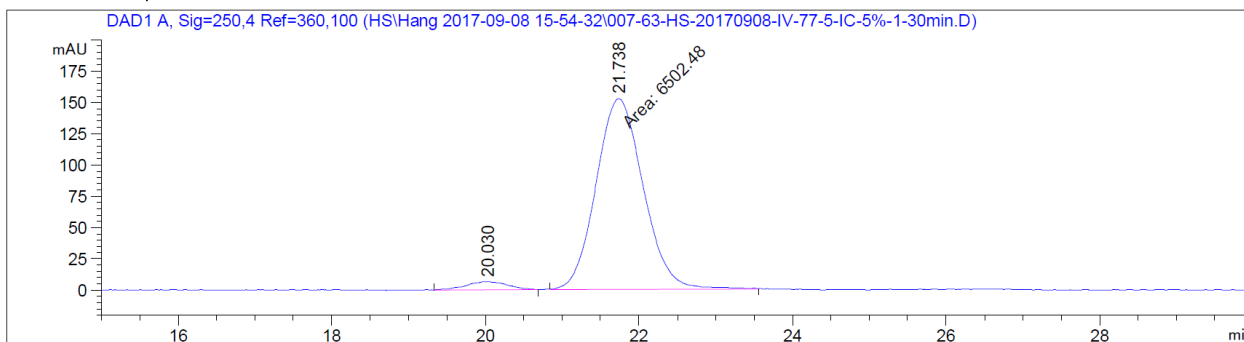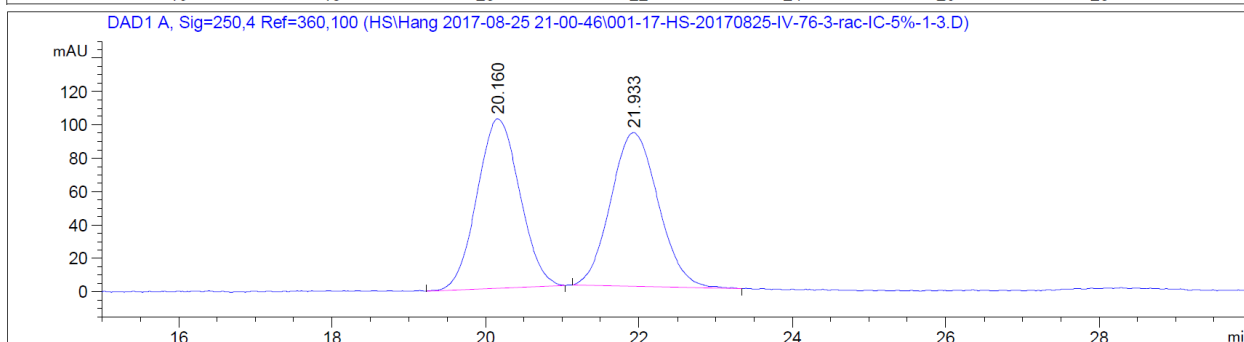

Signal 1: DAD1 A, Sig=250,4 Ref=360,100

| Peak # | RetTime [min] | Type | Width [min] | Area [mAU*s] | Height [mAU] | Area %  |
|--------|---------------|------|-------------|--------------|--------------|---------|
| 1      | 20.030        | BB   | 0.4498      | 244.98763    | 6.61937      | 3.6308  |
| 2      | 21.738        | MM   | 0.7111      | 6502.47852   | 152.40547    | 96.3692 |

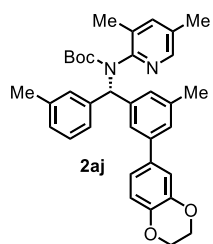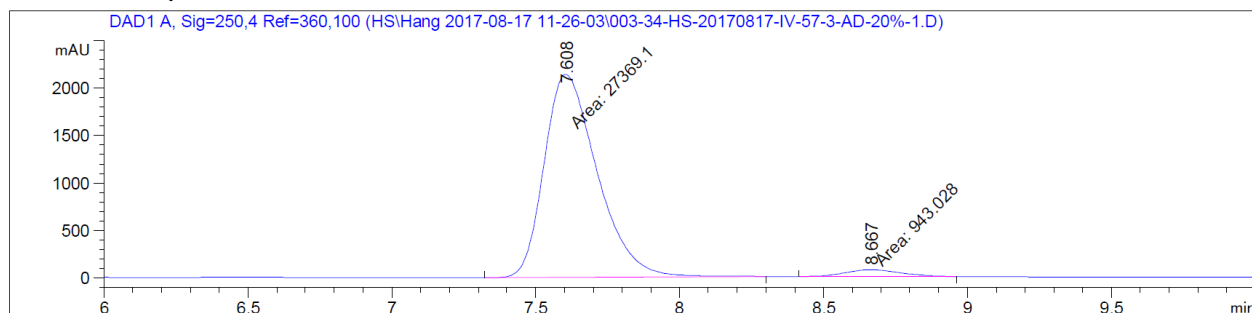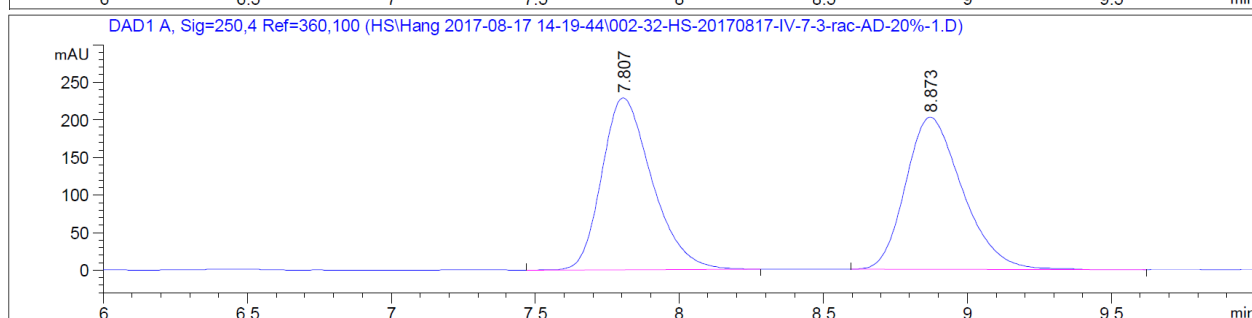

Signal 1: DAD1 A, Sig=250,4 Ref=360,100

| Peak # | RetTime [min] | Type | Width [min] | Area [mAU*s] | Height [mAU] | Area %  |
|--------|---------------|------|-------------|--------------|--------------|---------|
| 1      | 7.608         | MM   | 0.2132      | 2.73691e4    | 2139.36987   | 96.6692 |
| 2      | 8.667         | MM   | 0.2222      | 943.02783    | 70.74281     | 3.3308  |

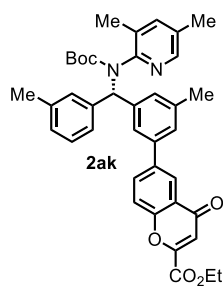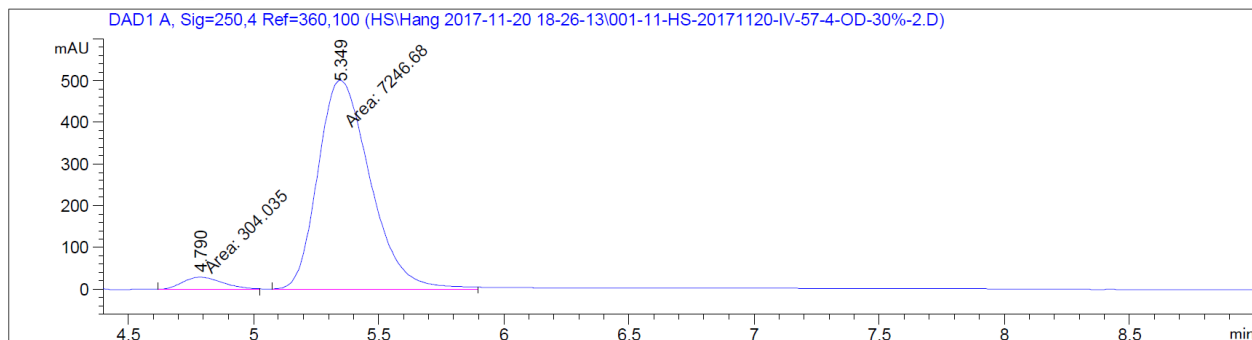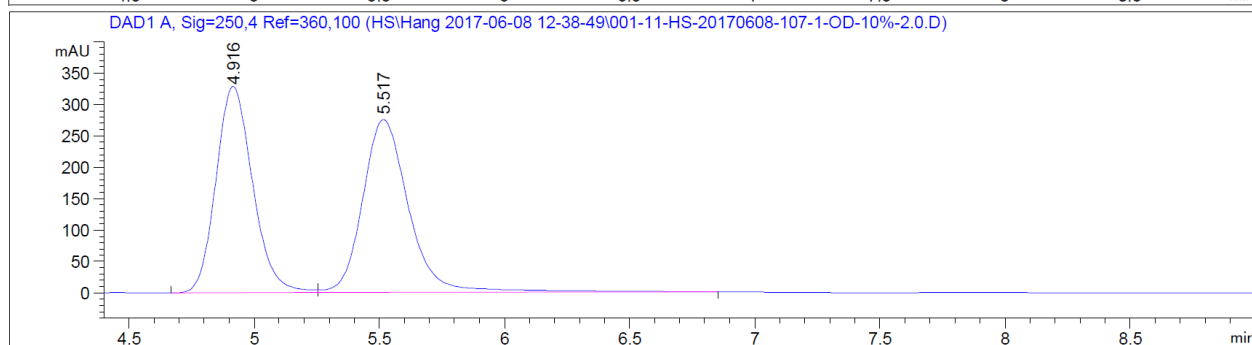

Signal 1: DAD1 A, Sig=250,4 Ref=360,100

| Peak # | RetTime [min] | Type | Width [min] | Area [mAU*s] | Height [mAU] | Area %  |
|--------|---------------|------|-------------|--------------|--------------|---------|
| 1      | 4.790         | MM   | 0.1805      | 304.03473    | 28.07036     | 4.0266  |
| 2      | 5.349         | MM   | 0.2411      | 7246.68115   | 500.97849    | 95.9734 |



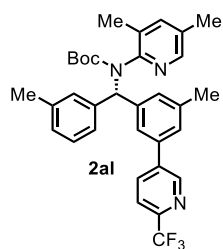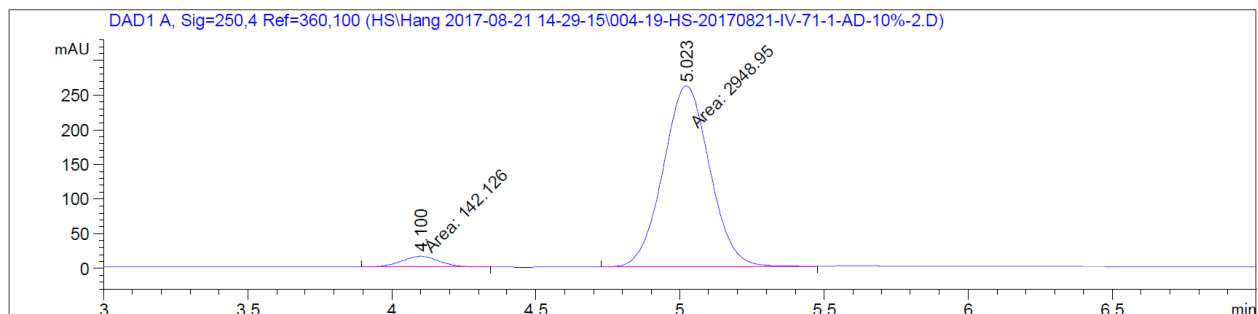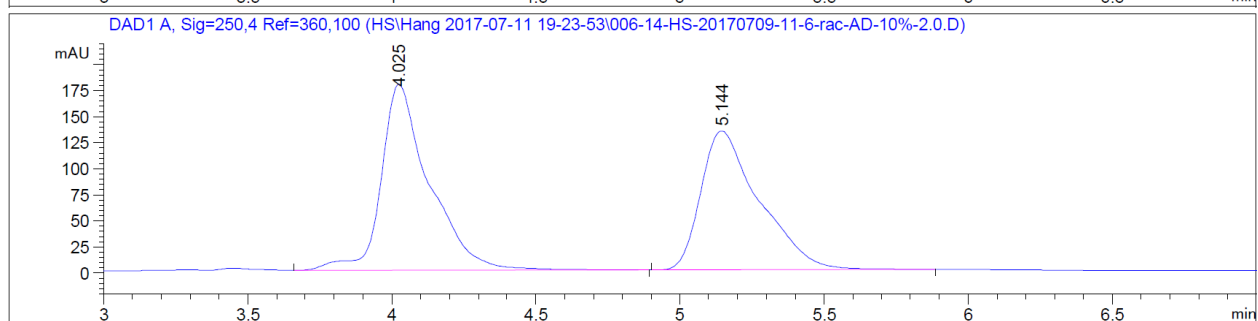

Signal 1: DAD1 A, Sig=250,4 Ref=360,100

| Peak # | RetTime [min] | Type | Width [min] | Area [mAU*s] | Height [mAU] | Area %  |
|--------|---------------|------|-------------|--------------|--------------|---------|
| 1      | 4.100         | MM   | 0.1552      | 142.12622    | 15.26688     | 4.5980  |
| 2      | 5.023         | MM   | 0.1878      | 2948.95020   | 261.68994    | 95.4020 |

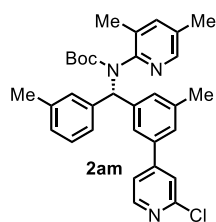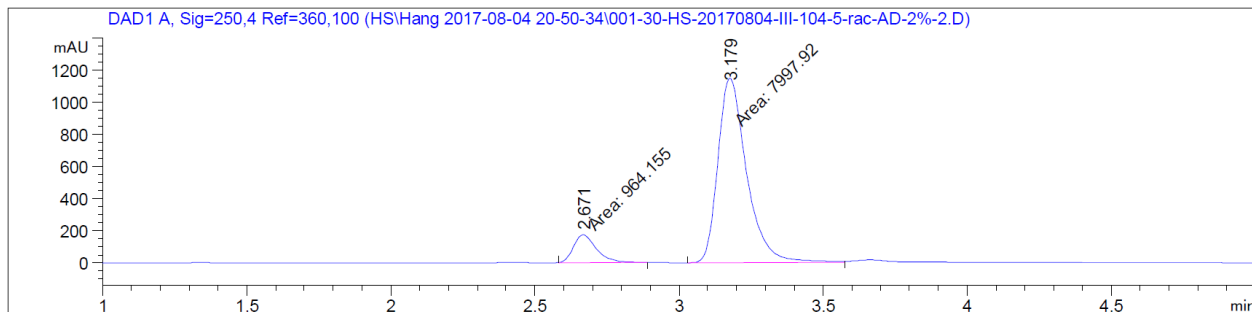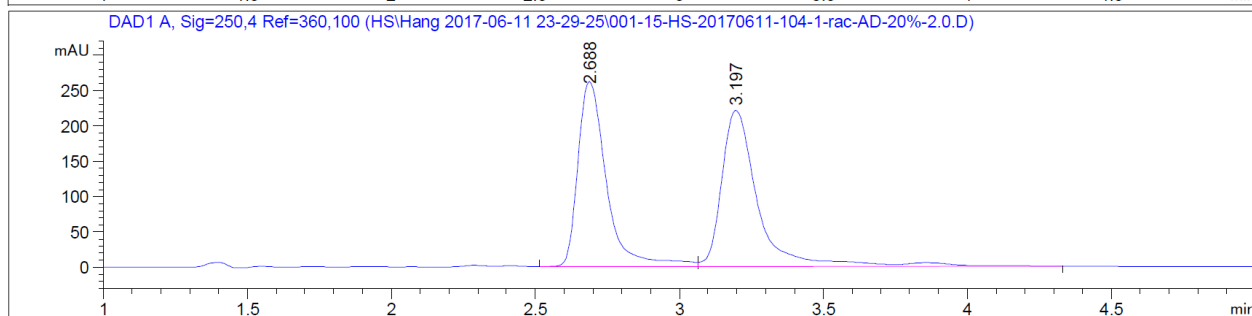

Signal 1: DAD1 A, Sig=250,4 Ref=360,100

| Peak # | RetTime [min] | Type | Width [min] | Area [mAU*s] | Height [mAU] | Area %  |
|--------|---------------|------|-------------|--------------|--------------|---------|
| 1      | 2.671         | MM   | 0.0920      | 964.15527    | 174.58240    | 10.7582 |
| 2      | 3.179         | MM   | 0.1155      | 7997.92480   | 1154.24976   | 89.2418 |

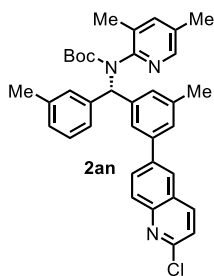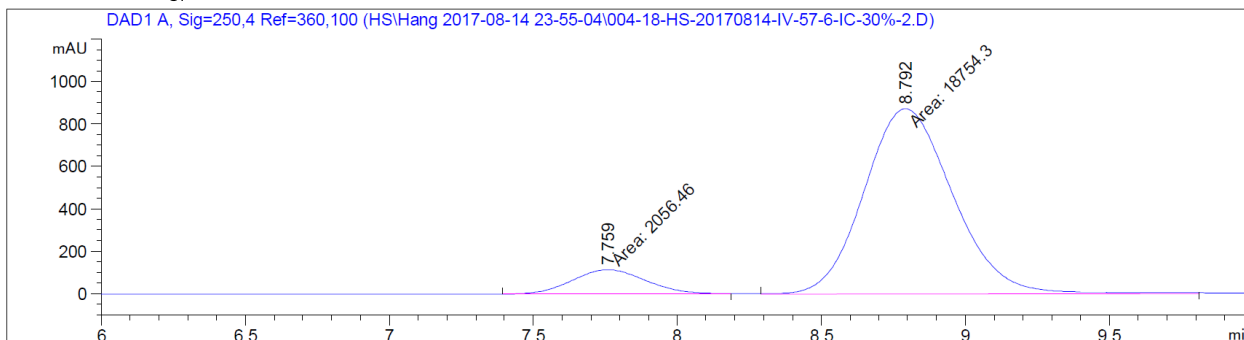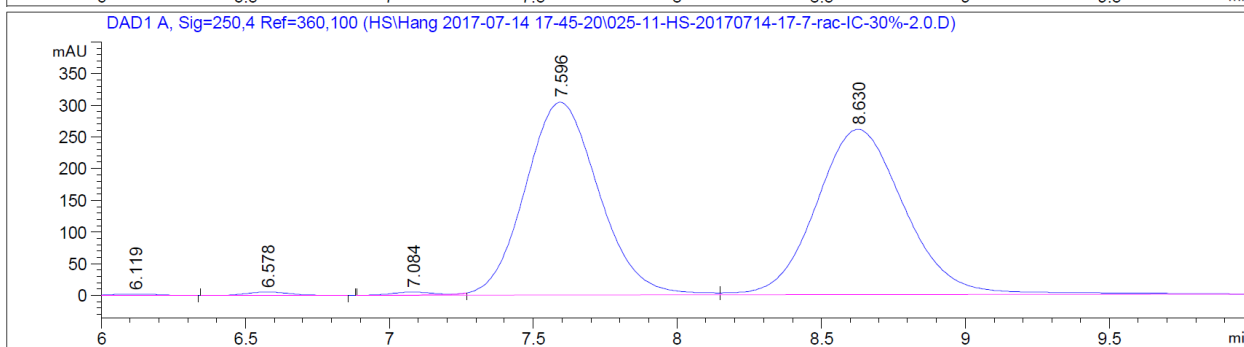

Signal 1: DAD1 A, Sig=250,4 Ref=360,100

| Peak # | RetTime [min] | Type | Width [min] | Area [mAU*s] | Height [mAU] | Area %  |
|--------|---------------|------|-------------|--------------|--------------|---------|
| 1      | 7.759         | MM   | 0.2990      | 2056.45923   | 114.62666    | 9.8817  |
| 2      | 8.792         | MM   | 0.3583      | 1.87543e4    | 872.31128    | 90.1183 |

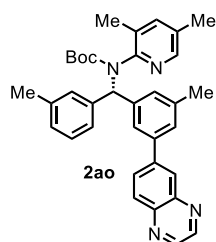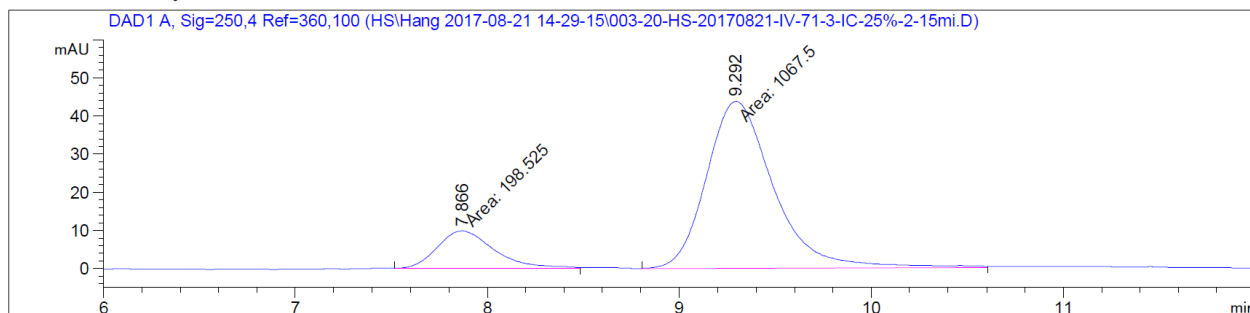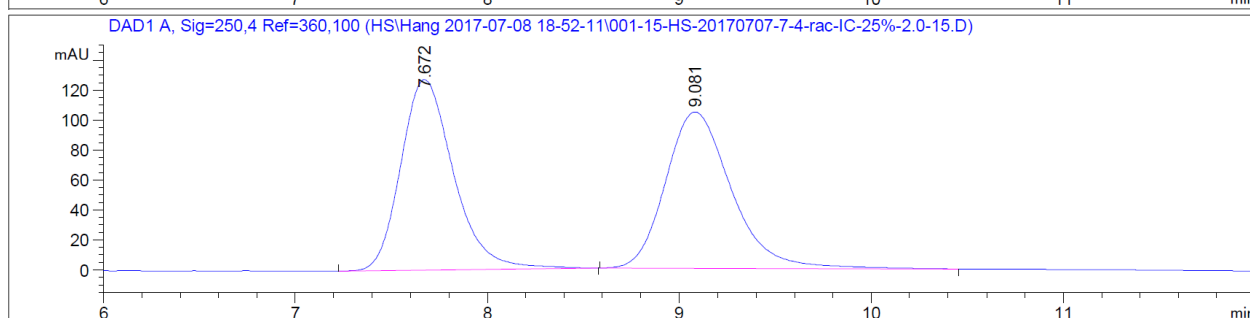

Signal 1: DAD1 A, Sig=250,4 Ref=360,100

| Peak # | RetTime [min] | Type | Width [min] | Area [mAU*s] | Height [mAU] | Area %  |
|--------|---------------|------|-------------|--------------|--------------|---------|
| 1      | 7.866         | MM   | 0.3384      | 198.52547    | 9.77880      | 15.6810 |
| 2      | 9.292         | MM   | 0.4059      | 1067.50208   | 43.83463     | 84.3190 |

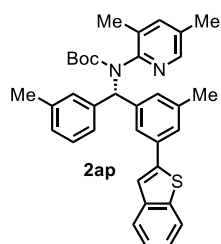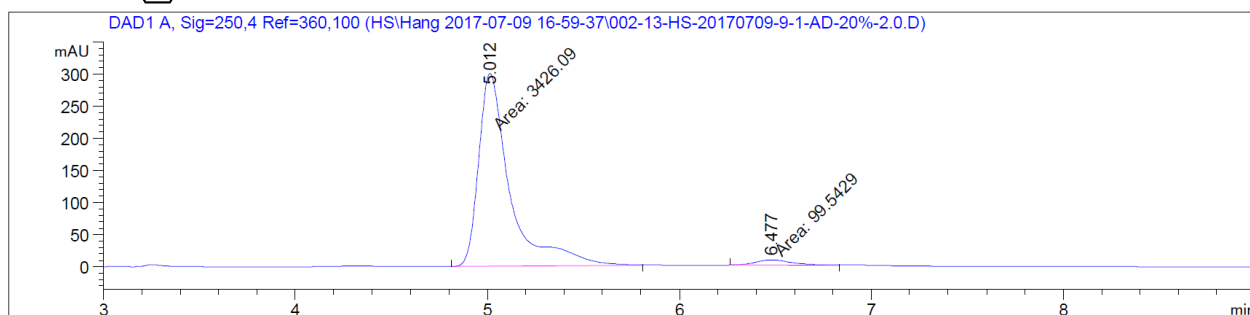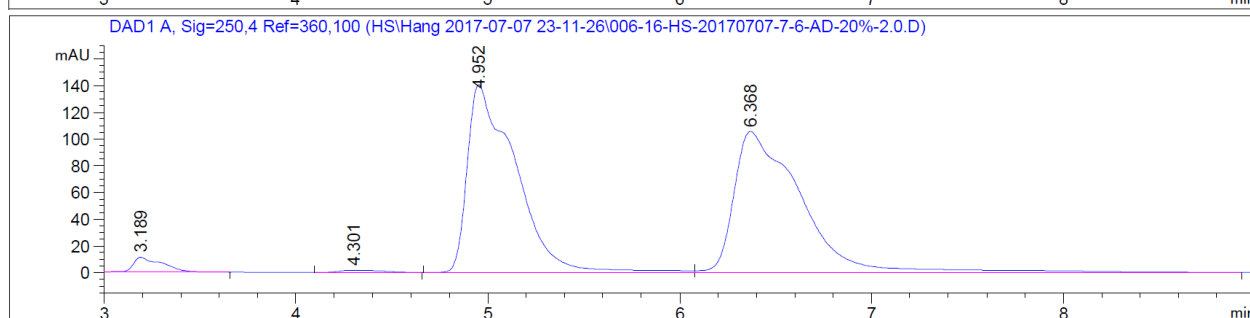

Signal 1: DAD1 A, Sig=250,4 Ref=360,100

| Peak # | RetTime [min] | Type | Width [min] | Area [mAU*s] | Height [mAU] | Area %  |
|--------|---------------|------|-------------|--------------|--------------|---------|
| 1      | 5.012         | MM   | 0.1902      | 3426.08545   | 300.28397    | 97.1766 |
| 2      | 6.477         | MM   | 0.2112      | 99.54285     | 7.85430      | 2.8234  |

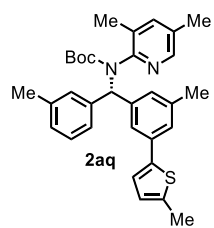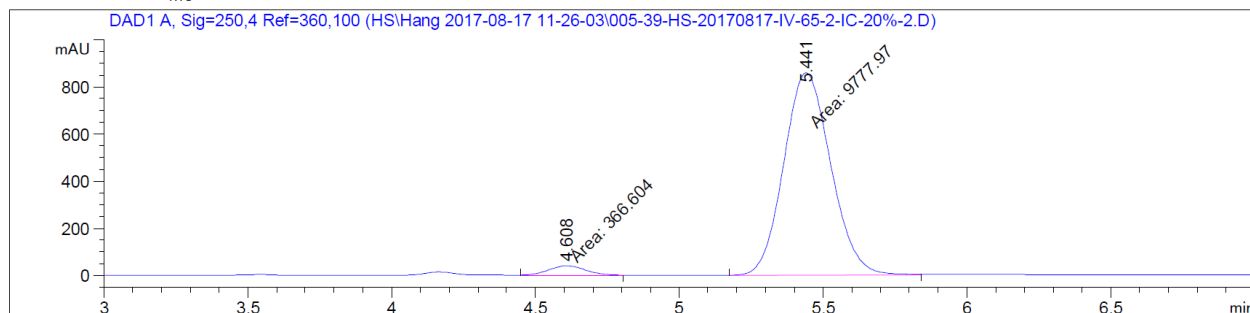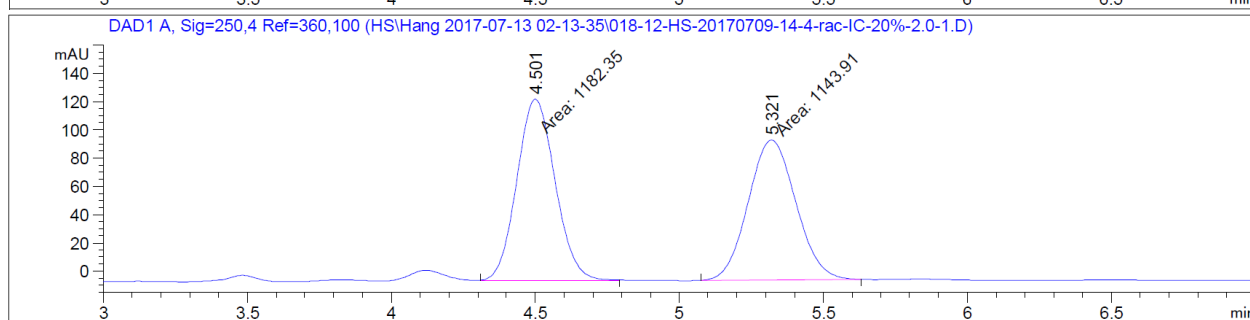

Signal 1: DAD1 A, Sig=250,4 Ref=360,100

| Peak # | RetTime [min] | Type | Width [min] | Area [mAU*s] | Height [mAU] | Area %  |
|--------|---------------|------|-------------|--------------|--------------|---------|
| 1      | 4.608         | MM   | 0.1523      | 366.60370    | 40.11977     | 3.6138  |
| 2      | 5.441         | MM   | 0.1896      | 9777.97461   | 859.60364    | 96.3862 |

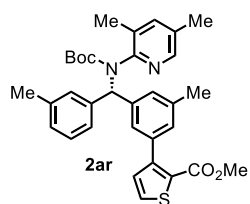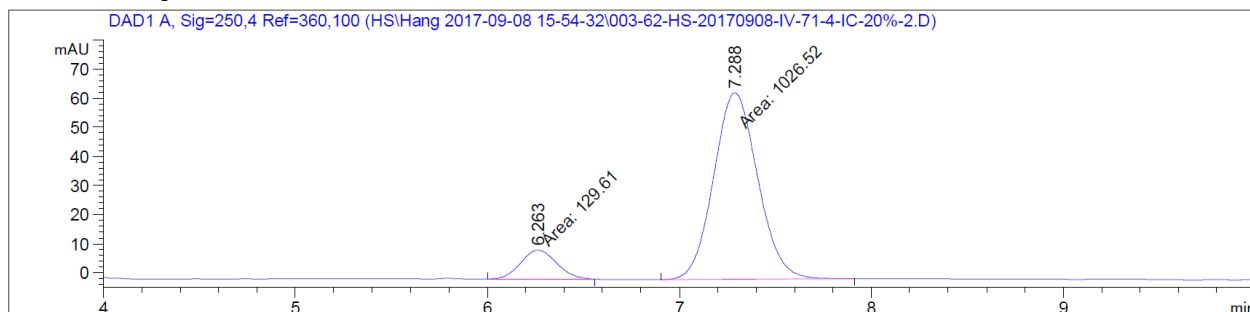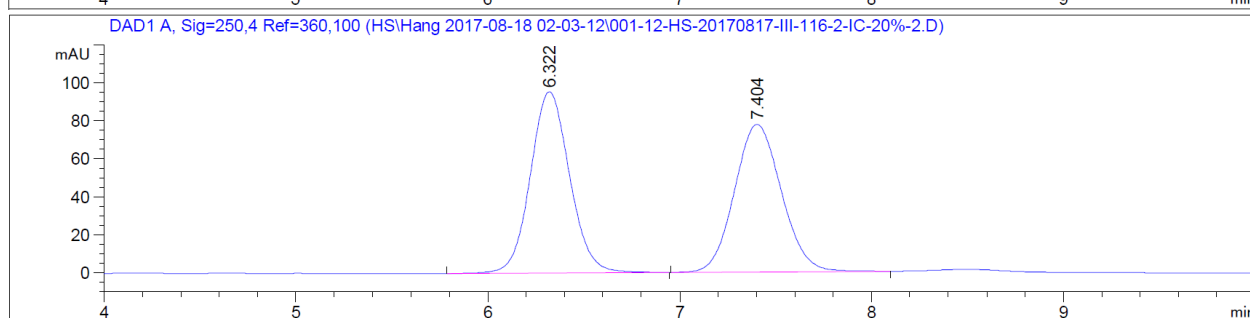

Signal 1: DAD1 A, Sig=250,4 Ref=360,100

| Peak # | RetTime [min] | Type | Width [min] | Area [mAU*s] | Height [mAU] | Area %  |
|--------|---------------|------|-------------|--------------|--------------|---------|
| 1      | 6.263         | MM   | 0.2169      | 129.60992    | 9.95831      | 11.2106 |
| 2      | 7.288         | MM   | 0.2665      | 1026.52490   | 64.20895     | 88.7894 |

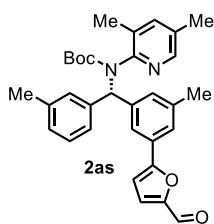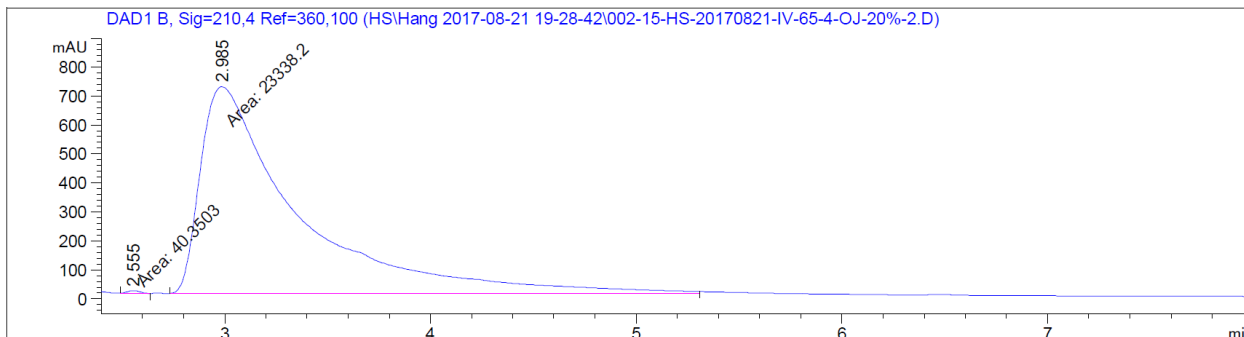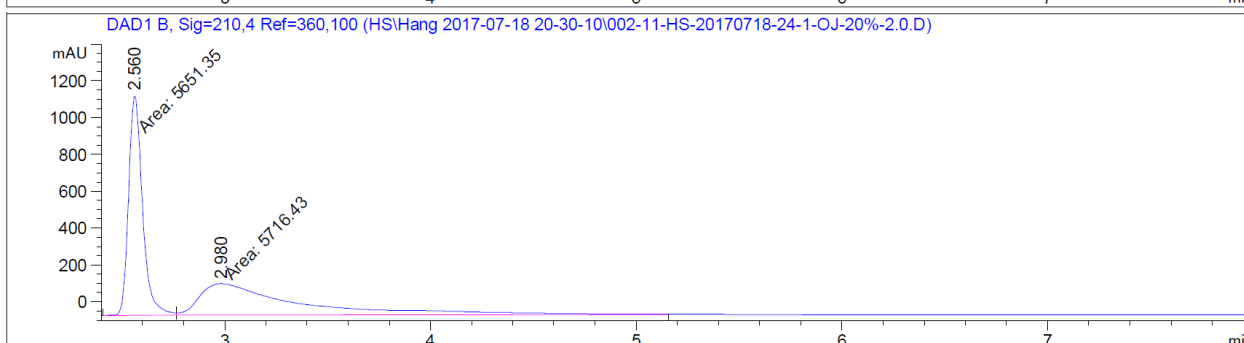

Signal 2: DAD1 B, Sig=210,4 Ref=360,100

| Peak # | RetTime [min] | Type | Width [min] | Area [mAU*s] | Height [mAU] | Area %  |
|--------|---------------|------|-------------|--------------|--------------|---------|
| 1      | 2.555         | MM   | 0.0719      | 40.35028     | 9.35781      | 0.1726  |
| 2      | 2.985         | MM   | 0.5451      | 2.33382e4    | 713.63544    | 99.8274 |



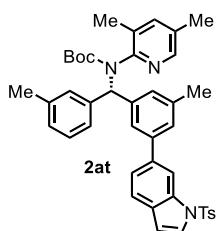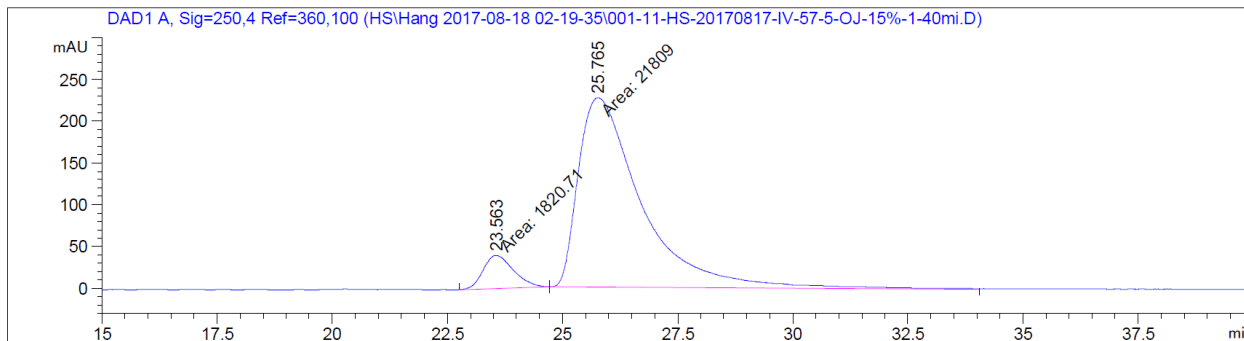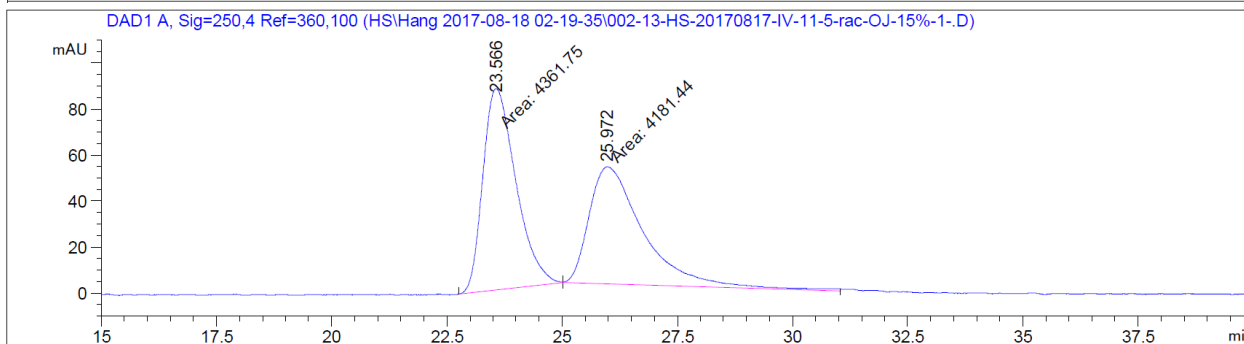

Signal 1: DAD1 A, Sig=250,4 Ref=360,100

| Peak # | RetTime [min] | Type | Width [min] | Area [mAU*s] | Height [mAU] | Area %  |
|--------|---------------|------|-------------|--------------|--------------|---------|
| 1      | 23.563        | MM   | 0.7665      | 1820.70520   | 39.58834     | 7.7051  |
| 2      | 25.765        | MM   | 1.6020      | 2.18090e4    | 226.88873    | 92.2949 |

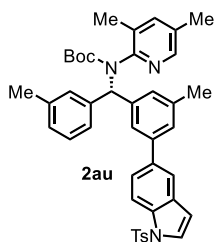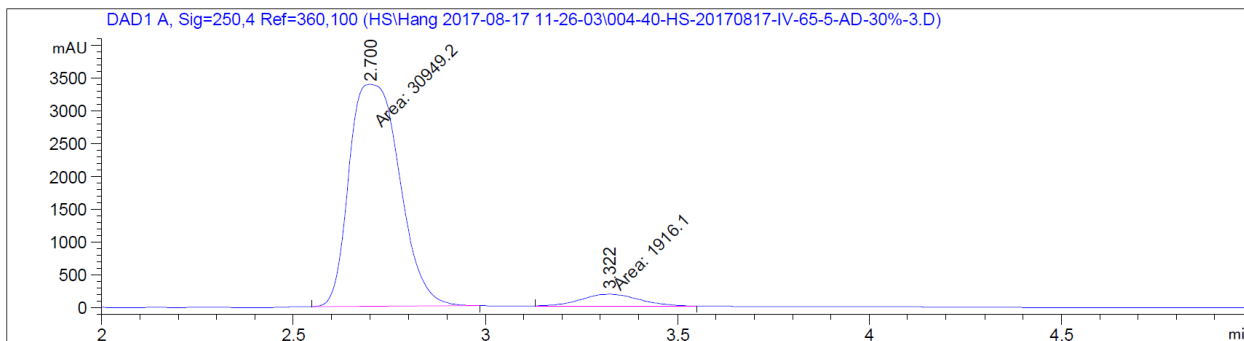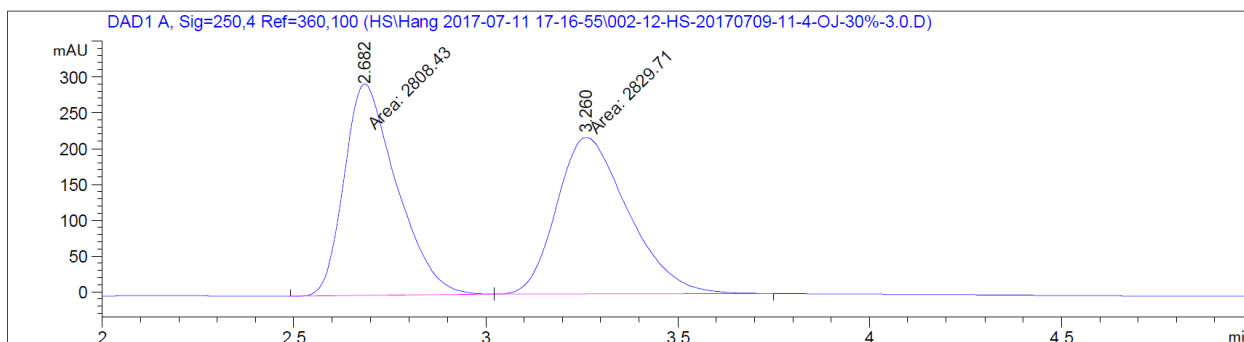

Signal 1: DAD1 A, Sig=250,4 Ref=360,100

| Peak # | RetTime [min] | Type | Width [min] | Area [mAU*s] | Height [mAU] | Area %  |
|--------|---------------|------|-------------|--------------|--------------|---------|
| 1      | 2.700         | MM   | 0.1525      | 3.09492e4    | 3382.94434   | 94.1698 |
| 2      | 3.322         | MM   | 0.1762      | 1916.10339   | 181.27367    | 5.8302  |

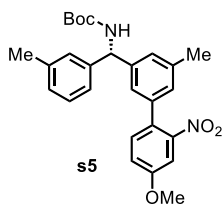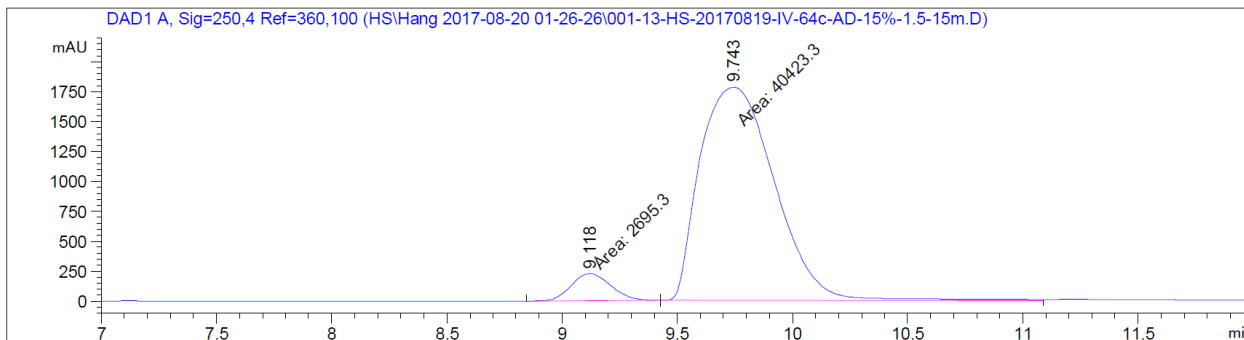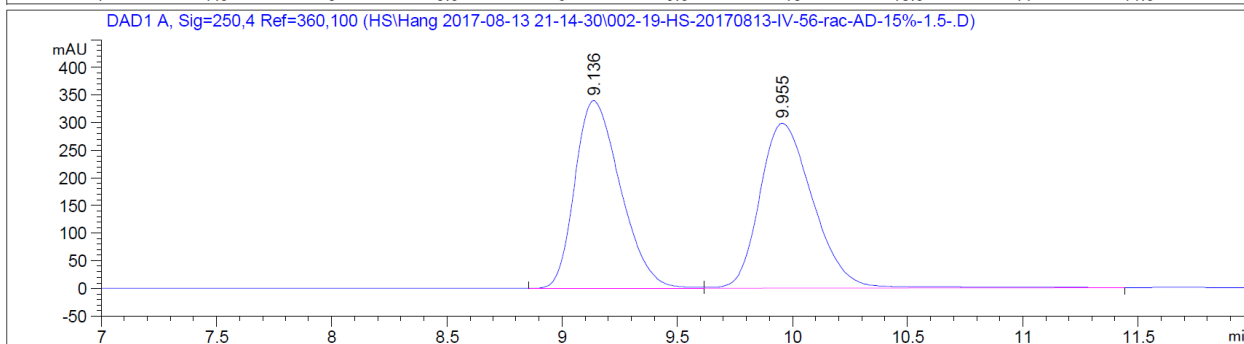

| Peak # | RetTime [min] | Type | Width [min] | Area [mAU*s] | Height [mAU] | Area %  |
|--------|---------------|------|-------------|--------------|--------------|---------|
| 1      | 9.118         | MM   | 0.1984      | 2695.29712   | 226.42526    | 6.2509  |
| 2      | 9.743         | MM   | 0.3780      | 4.04233e4    | 1782.31323   | 93.7491 |

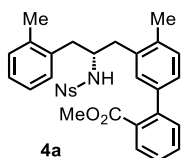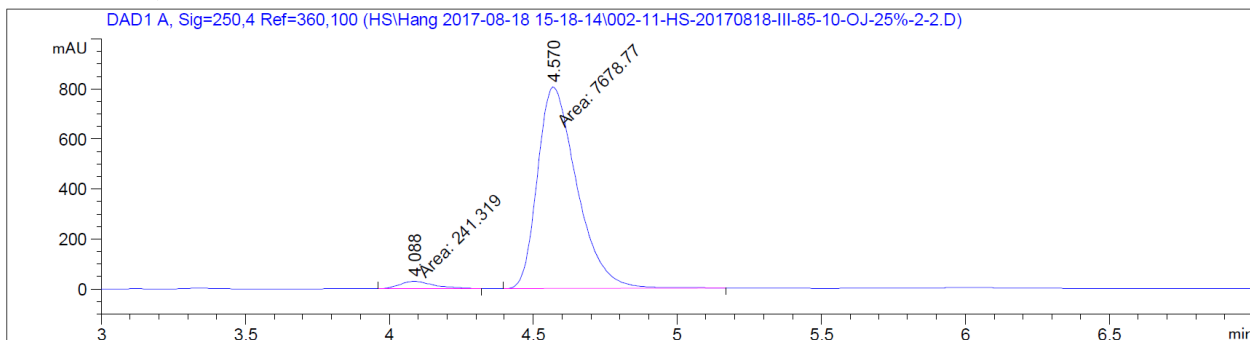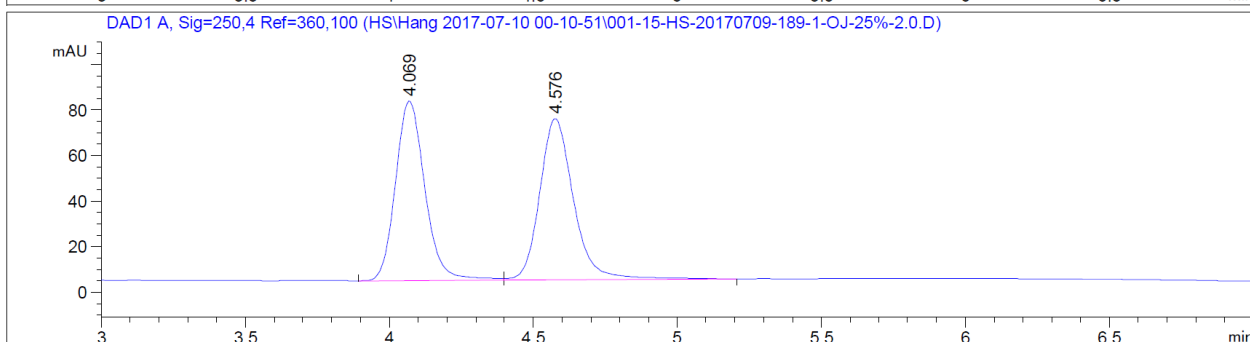

Signal 1: DAD1 A, Sig=250,4 Ref=360,100

| Peak # | RetTime [min] | Type | Width [min] | Area [mAU*s] | Height [mAU] | Area %  |
|--------|---------------|------|-------------|--------------|--------------|---------|
| 1      | 4.088         | MM   | 0.1385      | 241.31932    | 29.04813     | 3.0469  |
| 2      | 4.570         | MM   | 0.1587      | 7678.76660   | 806.38159    | 96.9531 |

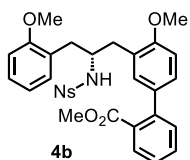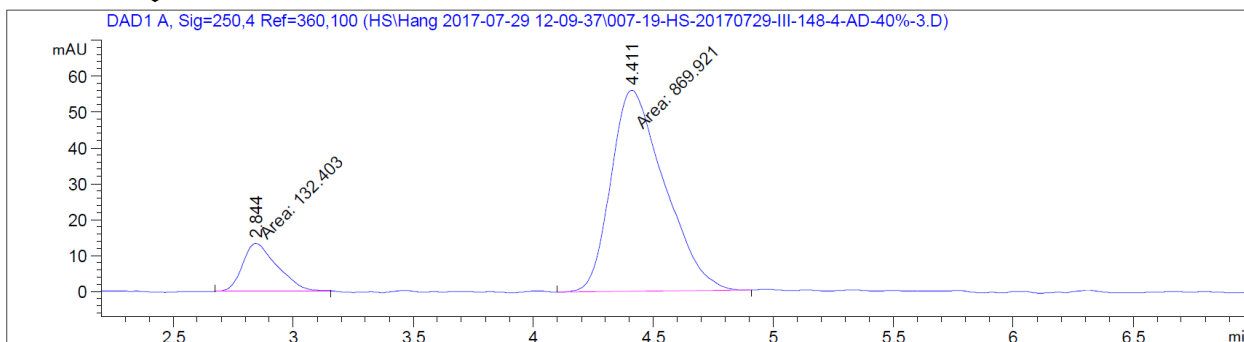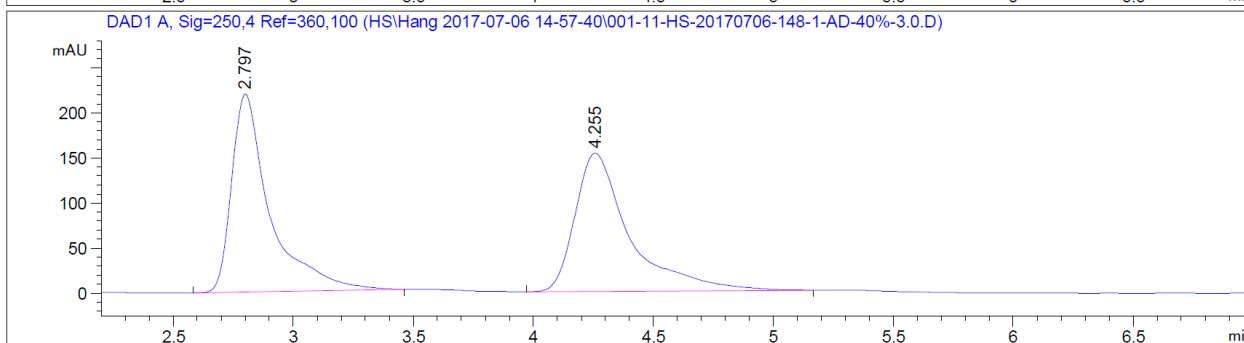

Signal 1: DAD1 A, Sig=250,4 Ref=360,100

| Peak # | RetTime [min] | Type | Width [min] | Area [mAU*s] | Height [mAU] | Area %  |
|--------|---------------|------|-------------|--------------|--------------|---------|
| 1      | 2.844         | MM   | 0.1658      | 132.40337    | 13.30708     | 13.2096 |
| 2      | 4.411         | MM   | 0.2586      | 869.92133    | 56.06168     | 86.7904 |

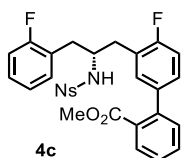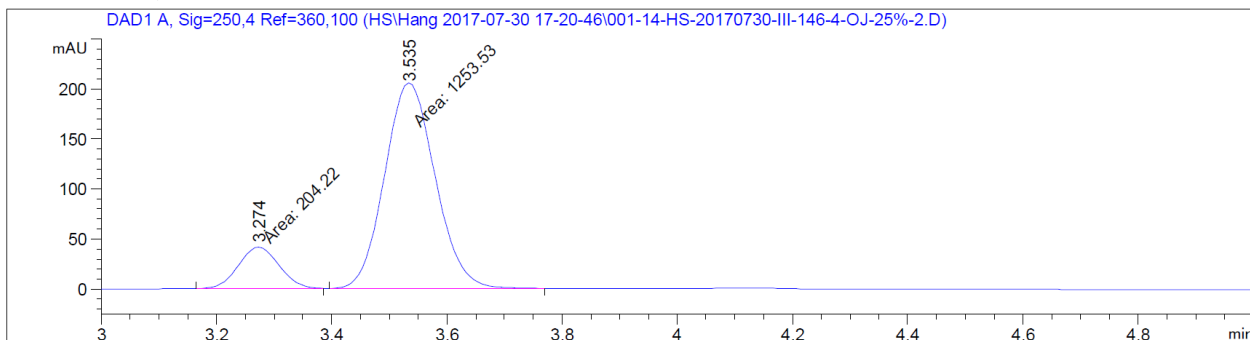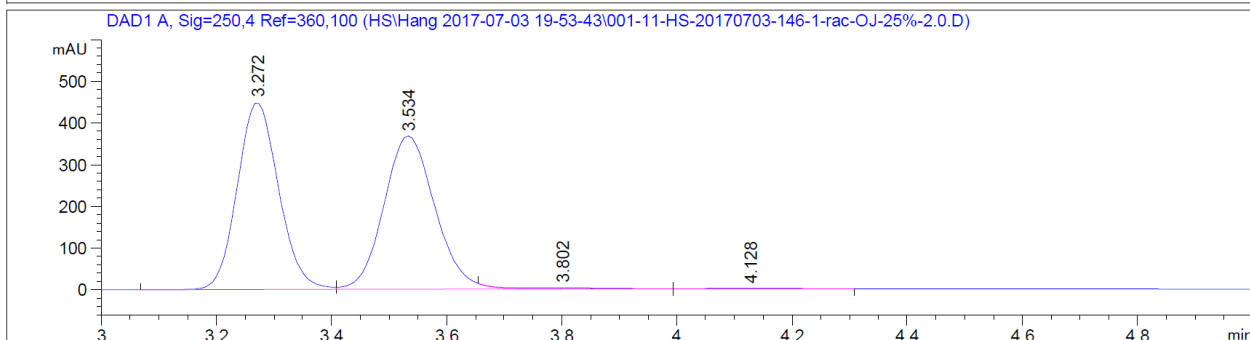

Signal 1: DAD1 A, Sig=250,4 Ref=360,100

| Peak # | RetTime [min] | Type | Width [min] | Area [mAU*s] | Height [mAU] | Area %  |
|--------|---------------|------|-------------|--------------|--------------|---------|
| 1      | 3.274         | MM   | 0.0816      | 204.21960    | 41.70602     | 14.0092 |
| 2      | 3.535         | MM   | 0.1014      | 1253.53442   | 206.02576    | 85.9908 |

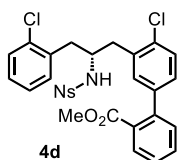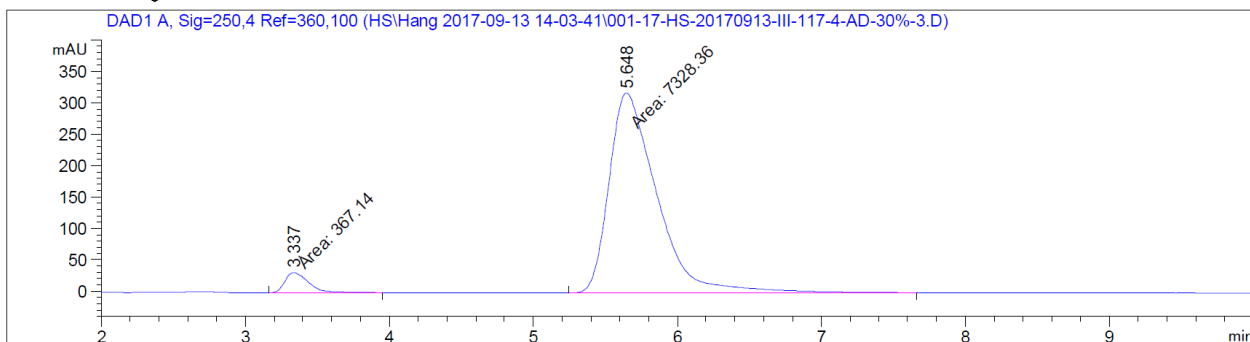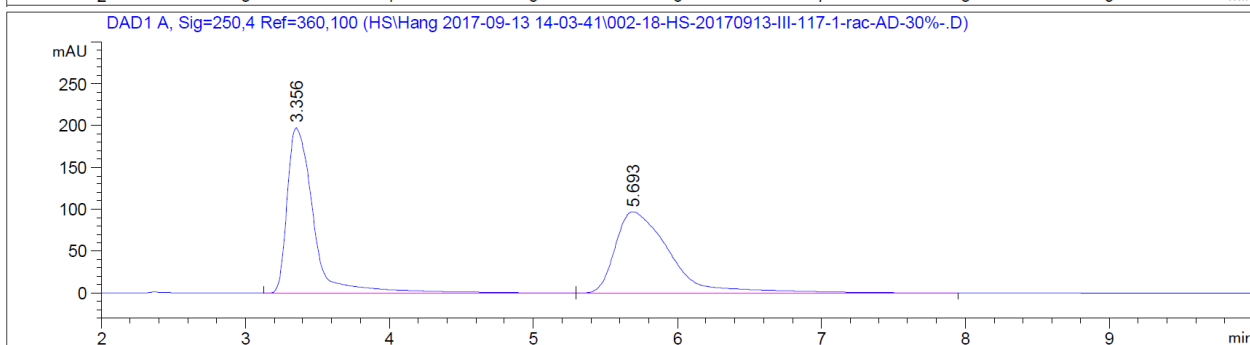

Signal 1: DAD1 A, Sig=250,4 Ref=360,100

| Peak # | RetTime [min] | Type | Width [min] | Area [mAU*s] | Height [mAU] | Area %  |
|--------|---------------|------|-------------|--------------|--------------|---------|
| 1      | 3.337         | MM   | 0.1902      | 367.13989    | 32.17627     | 4.7708  |
| 2      | 5.648         | MM   | 0.3832      | 7328.36084   | 318.74097    | 95.2292 |

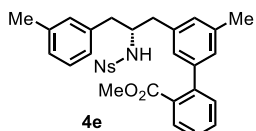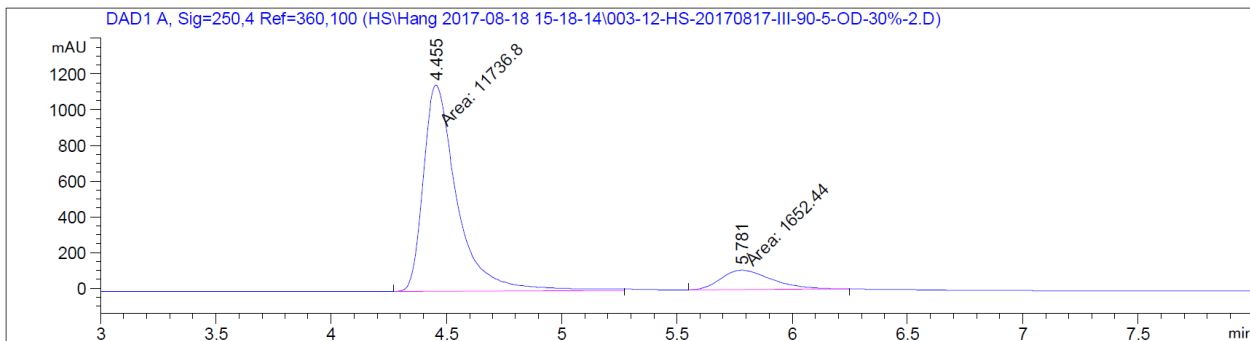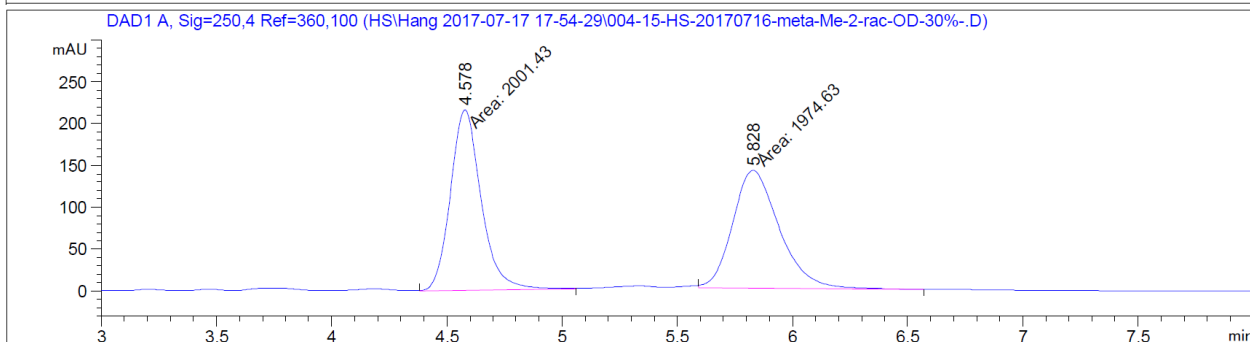

Signal 1: DAD1 A, Sig=250,4 Ref=360,100

| Peak # | RetTime [min] | Type | Width [min] | Area [mAU*s] | Height [mAU] | Area %  |
|--------|---------------|------|-------------|--------------|--------------|---------|
| 1      | 4.455         | MM   | 0.1695      | 1.17368e4    | 1153.87244   | 87.6585 |
| 2      | 5.781         | MM   | 0.2540      | 1652.43713   | 108.42530    | 12.3415 |



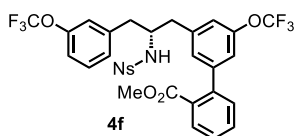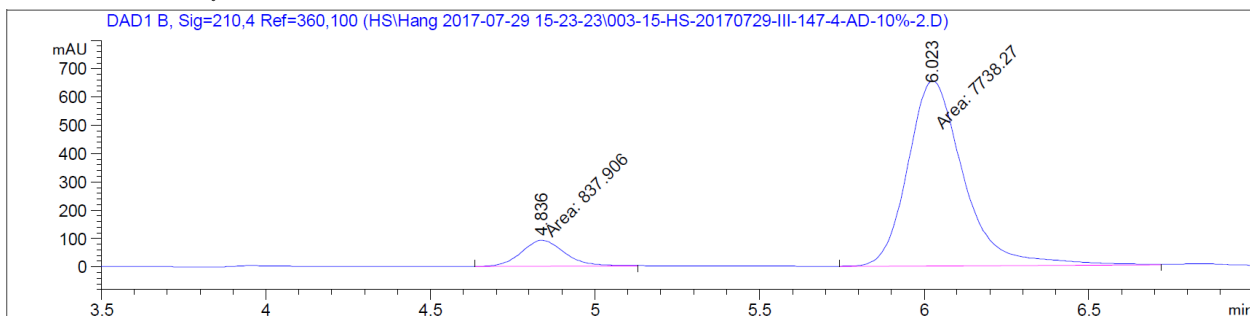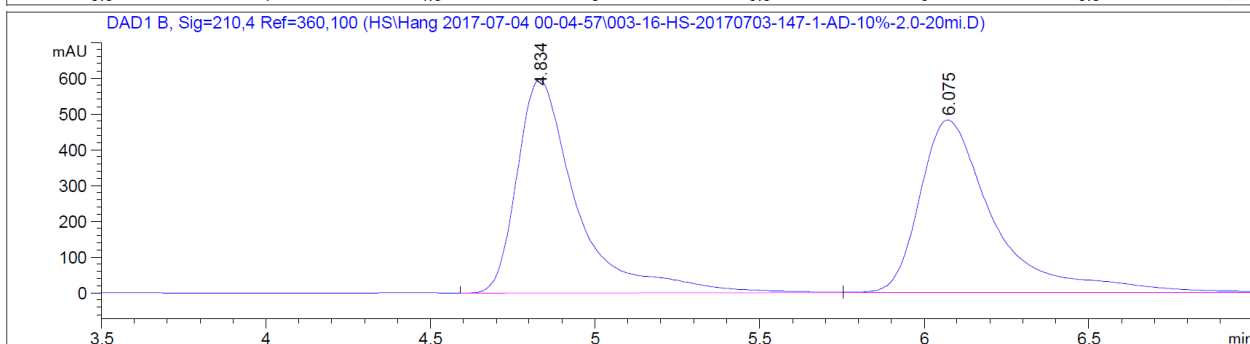

Signal 2: DAD1 B, Sig=210,4 Ref=360,100

| Peak # | RetTime [min] | Type | Width [min] | Area [mAU*s] | Height [mAU] | Area %  |
|--------|---------------|------|-------------|--------------|--------------|---------|
| 1      | 4.836         | MM   | 0.1526      | 837.90576    | 91.53378     | 9.7702  |
| 2      | 6.023         | MM   | 0.1971      | 7738.27490   | 654.50769    | 90.2298 |

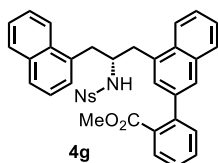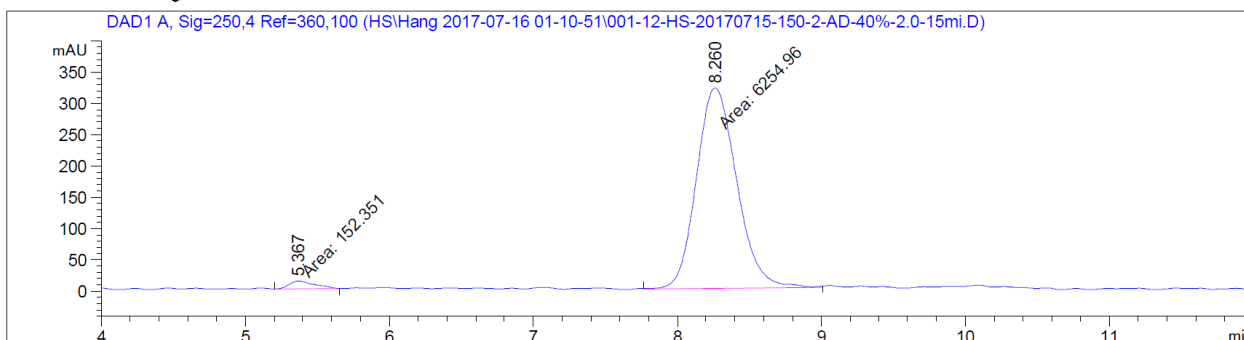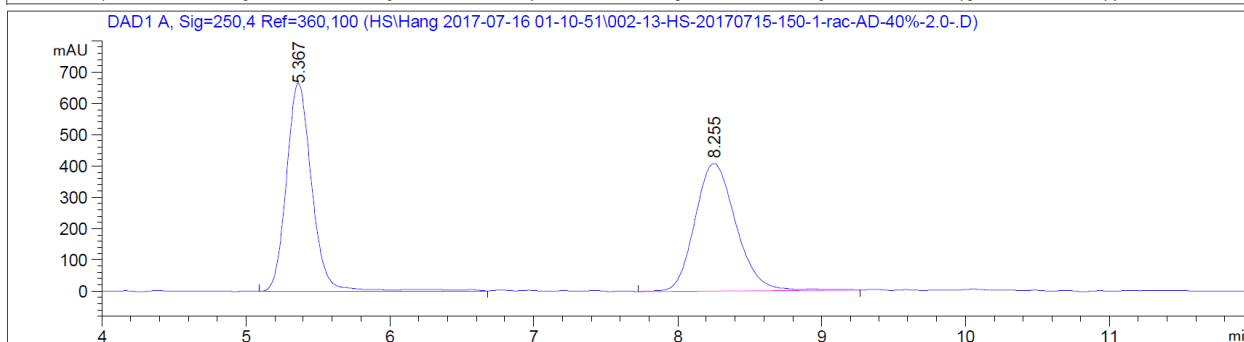

Signal 1: DAD1 A, Sig=250,4 Ref=360,100

| Peak # | RetTime [min] | Type | Width [min] | Area [mAU*s] | Height [mAU] | Area %  |
|--------|---------------|------|-------------|--------------|--------------|---------|
| 1      | 5.367         | MM   | 0.2039      | 152.35146    | 12.45088     | 2.3778  |
| 2      | 8.260         | MM   | 0.3247      | 6254.95654   | 321.03714    | 97.6222 |

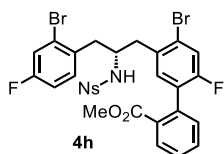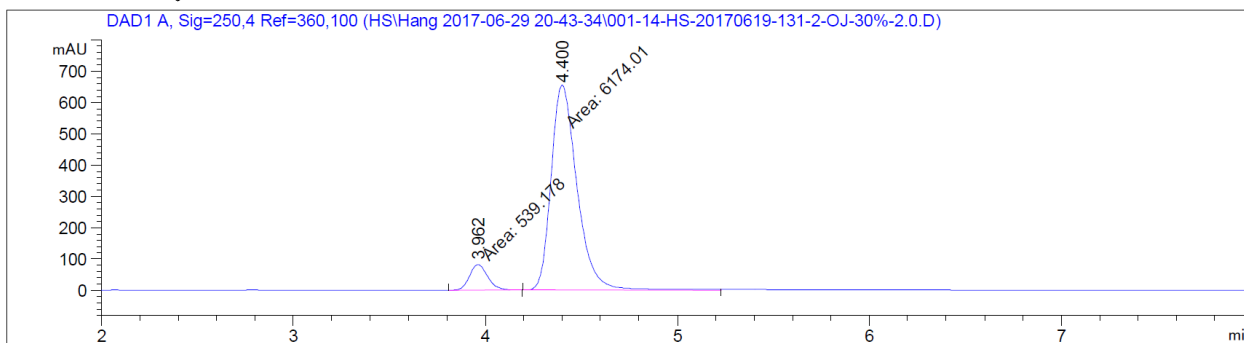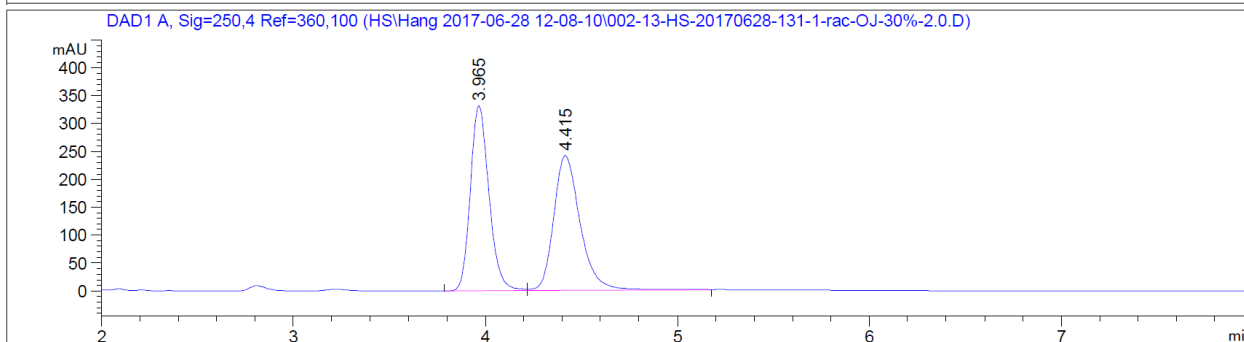

Signal 1: DAD1 A, Sig=250,4 Ref=360,100

| Peak # | RetTime [min] | Type | Width [min] | Area [mAU*s] | Height [mAU] | Area %  |
|--------|---------------|------|-------------|--------------|--------------|---------|
| 1      | 3.962         | MM   | 0.1099      | 539.17792    | 81.76174     | 8.0316  |
| 2      | 4.400         | MM   | 0.1569      | 6174.00928   | 656.01202    | 91.9684 |

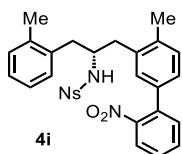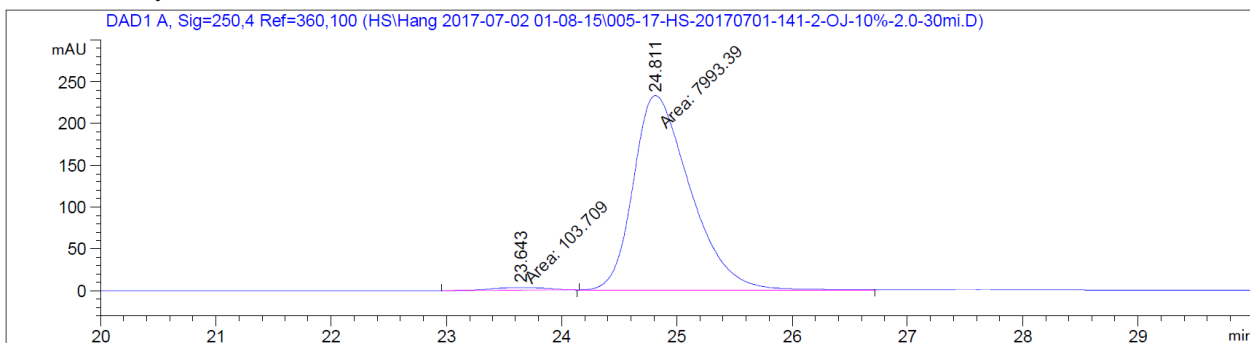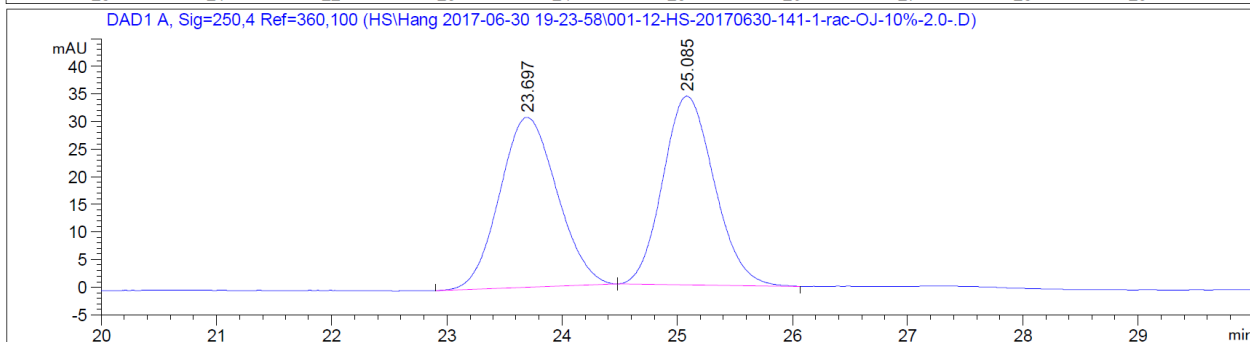

Signal 1: DAD1 A, Sig=250,4 Ref=360,100

| Peak # | RetTime [min] | Type | Width [min] | Area [mAU*s] | Height [mAU] | Area %  |
|--------|---------------|------|-------------|--------------|--------------|---------|
| 1      | 23.643        | MM   | 0.5091      | 103.70914    | 3.39537      | 1.2808  |
| 2      | 24.811        | MM   | 0.5724      | 7993.39209   | 232.74353    | 98.7192 |

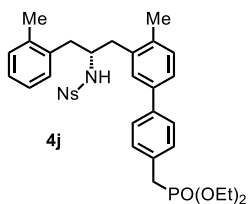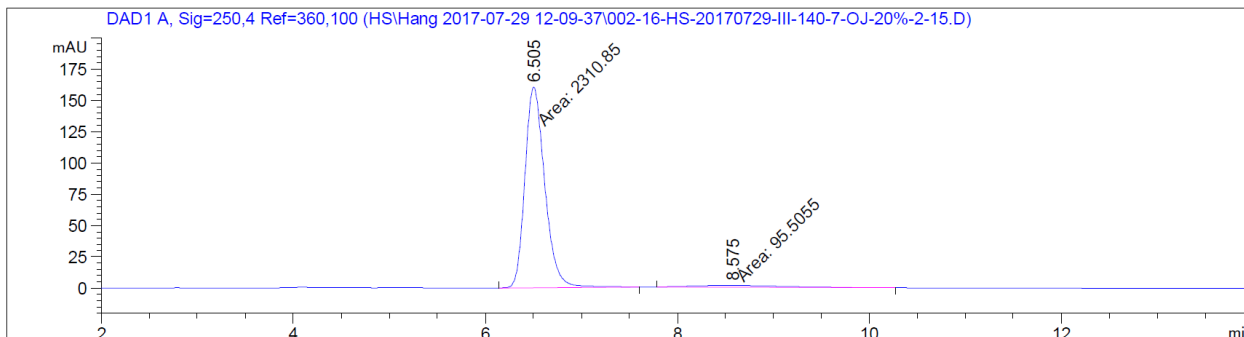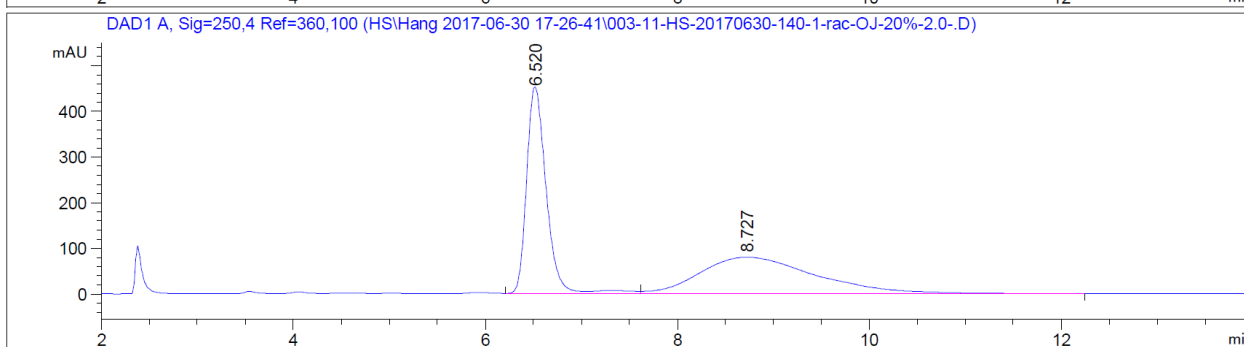

Signal 1: DAD1 A, Sig=250,4 Ref=360,100

| Peak # | RetTime [min] | Type | Width [min] | Area [mAU*s] | Height [mAU] | Area %  |
|--------|---------------|------|-------------|--------------|--------------|---------|
| 1      | 6.505         | MM   | 0.2401      | 2310.84912   | 160.43649    | 96.0311 |
| 2      | 8.575         | MM   | 1.1314      | 95.50554     | 1.40690      | 3.9689  |

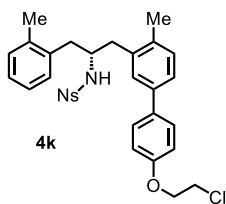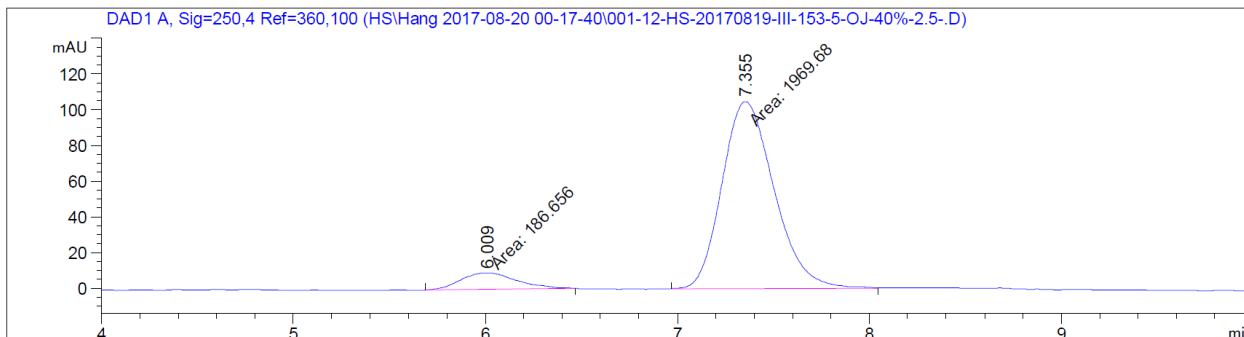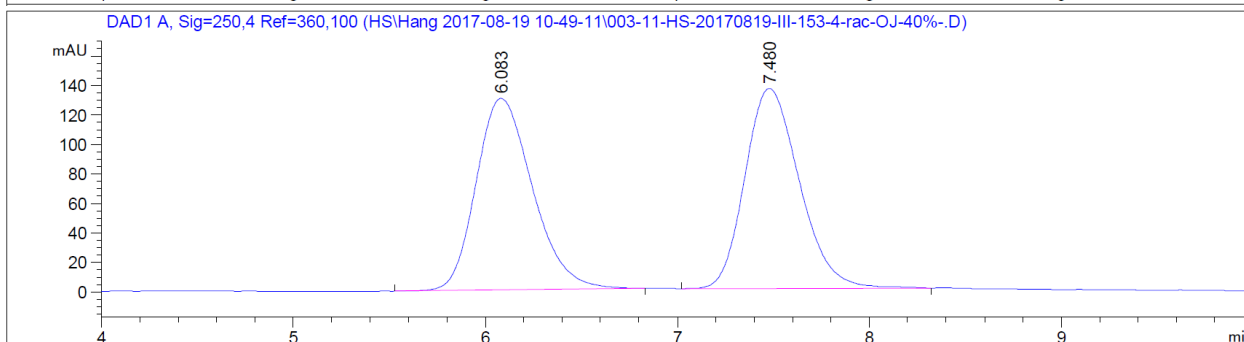

Signal 1: DAD1 A, Sig=250,4 Ref=360,100

| Peak # | RetTime [min] | Type | Width [min] | Area [mAU*s] | Height [mAU] | Area %  |
|--------|---------------|------|-------------|--------------|--------------|---------|
| 1      | 6.009         | MM   | 0.3380      | 186.65569    | 9.20326      | 8.6562  |
| 2      | 7.355         | MM   | 0.3139      | 1969.67542   | 104.57546    | 91.3438 |

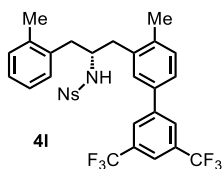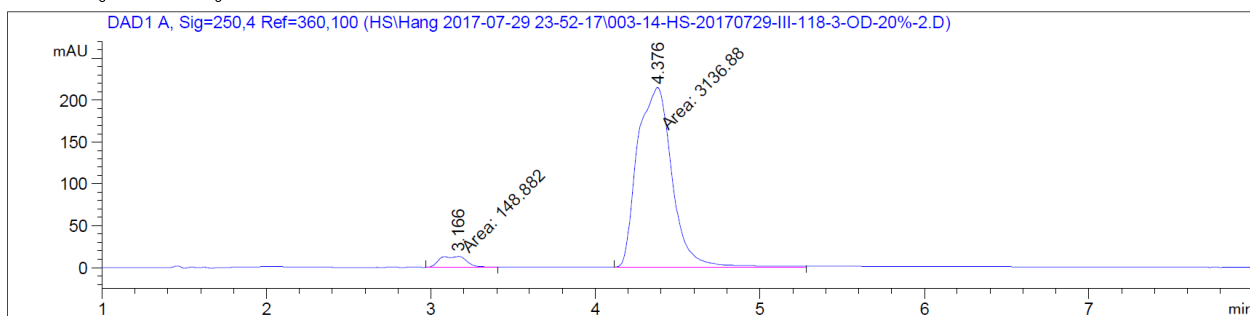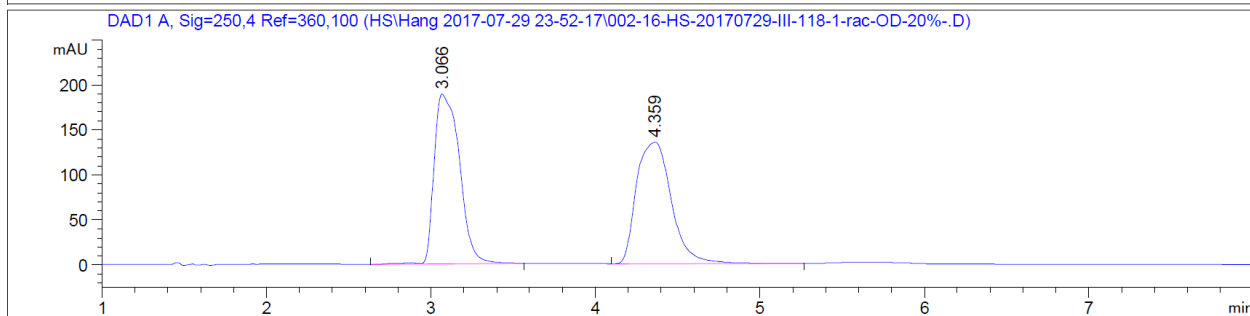

Signal 1: DAD1 A, Sig=250,4 Ref=360,100

| Peak # | RetTime [min] | Type | Width [min] | Area [mAU*s] | Height [mAU] | Area %  |
|--------|---------------|------|-------------|--------------|--------------|---------|
| 1      | 3.166         | MM   | 0.1885      | 148.88176    | 13.16310     | 4.5311  |
| 2      | 4.376         | MM   | 0.2433      | 3136.87891   | 214.88333    | 95.4689 |

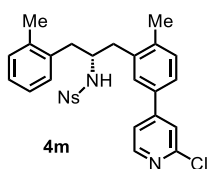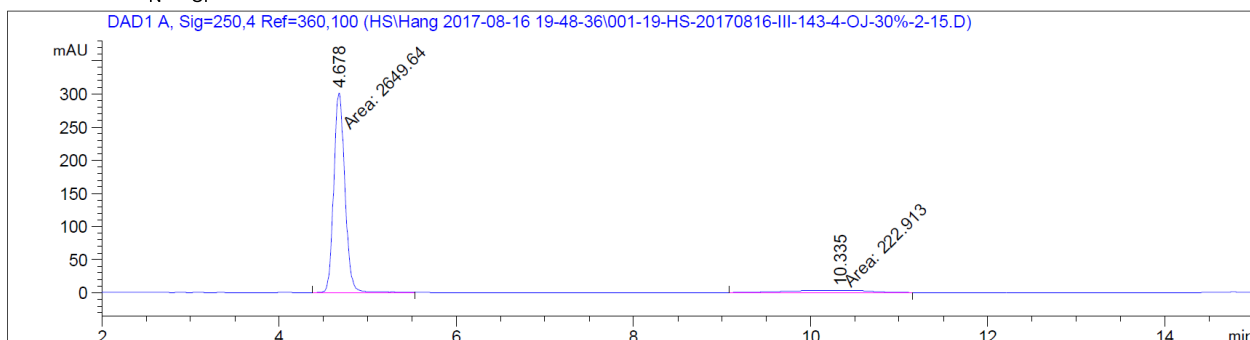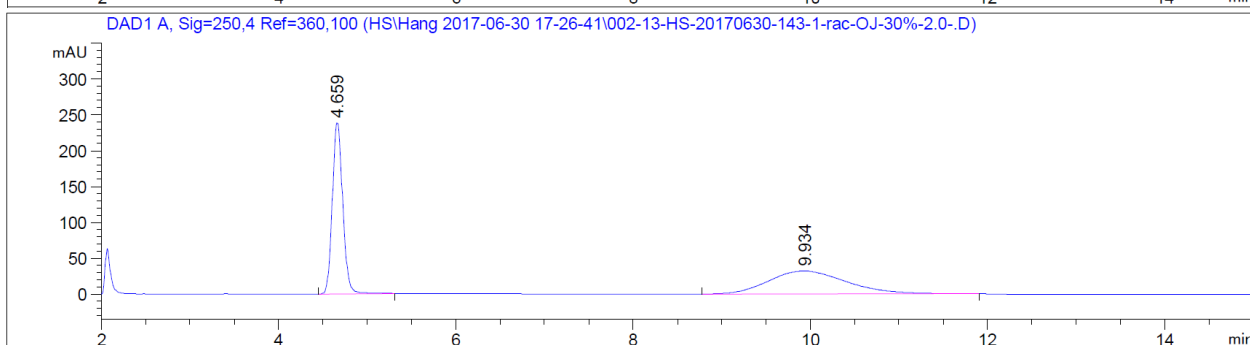

Signal 1: DAD1 A, Sig=250,4 Ref=360,100

| Peak # | RetTime [min] | Type | Width [min] | Area [mAU*s] | Height [mAU] | Area %  |
|--------|---------------|------|-------------|--------------|--------------|---------|
| 1      | 4.678         | MM   | 0.1465      | 2649.63574   | 301.41370    | 92.2399 |
| 2      | 10.335        | MM   | 1.1082      | 222.91309    | 3.35239      | 7.7601  |



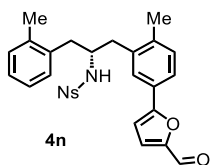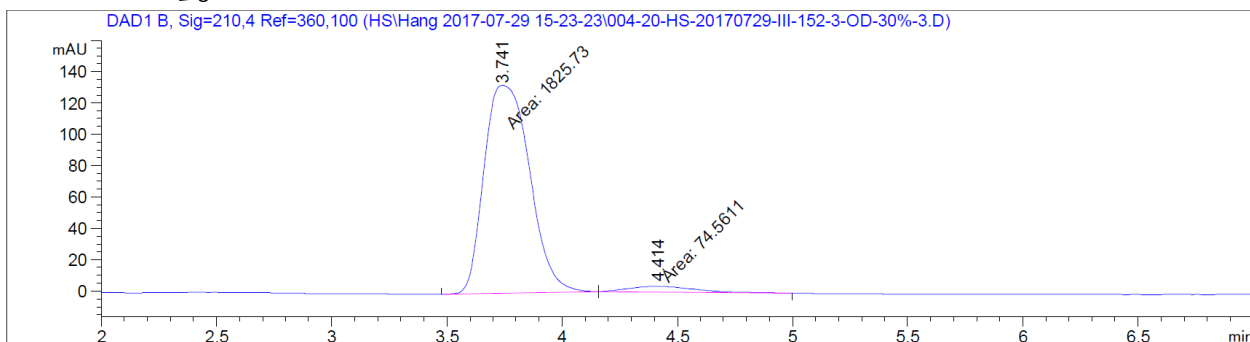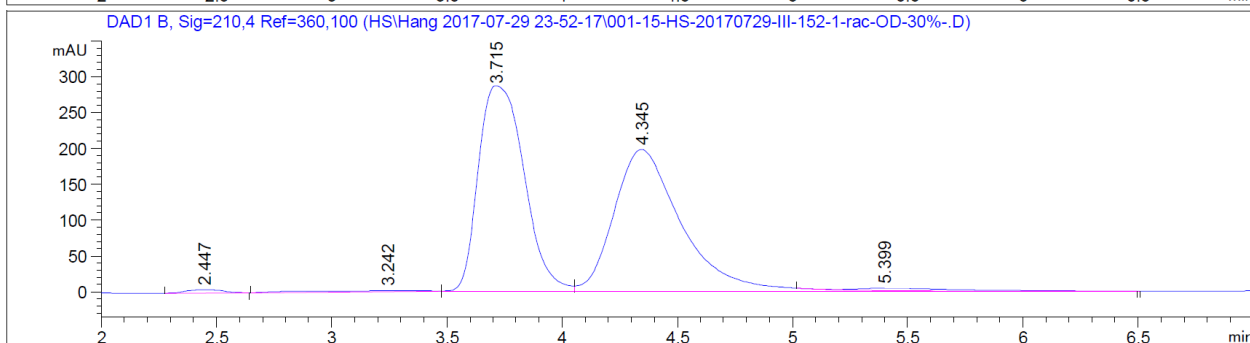

Signal 2: DAD1 B, Sig=210,4 Ref=360,100

| Peak # | RetTime [min] | Type | Width [min] | Area [mAU*s] | Height [mAU] | Area %  |
|--------|---------------|------|-------------|--------------|--------------|---------|
| 1      | 3.741         | MM   | 0.2292      | 1825.73450   | 132.75627    | 96.0763 |
| 2      | 4.414         | MM   | 0.3333      | 74.56106     | 3.72887      | 3.9237  |

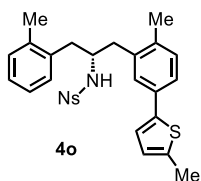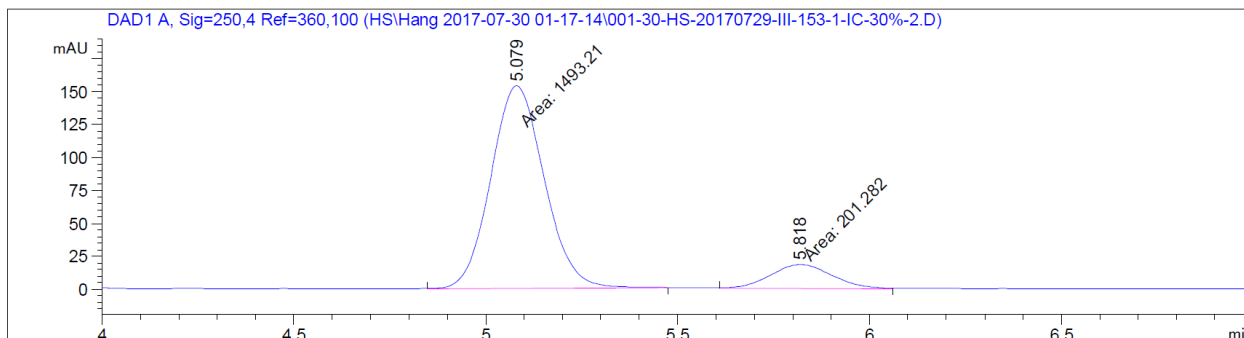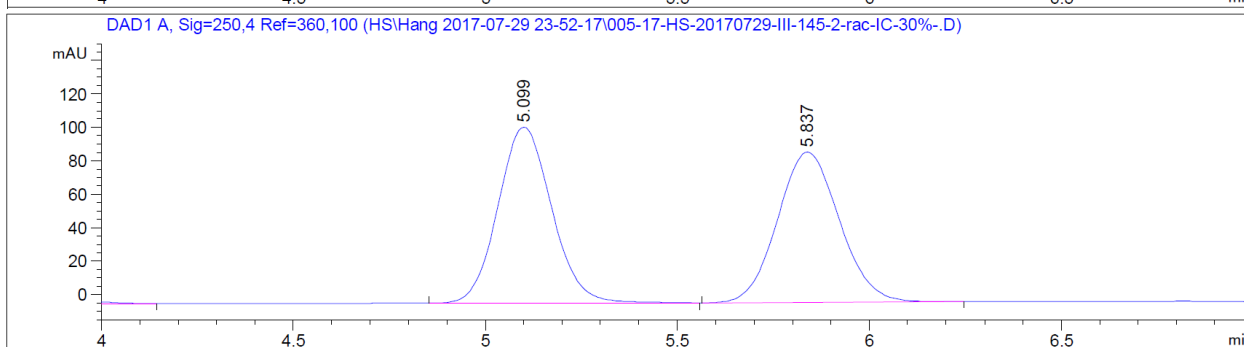

Signal 1: DAD1 A, Sig=250,4 Ref=360,100

| Peak # | RetTime [min] | Type | Width [min] | Area [mAU*s] | Height [mAU] | Area %  |
|--------|---------------|------|-------------|--------------|--------------|---------|
| 1      | 5.079         | MM   | 0.1616      | 1493.21191   | 153.99384    | 88.1214 |
| 2      | 5.818         | MM   | 0.1849      | 201.28221    | 18.13864     | 11.8786 |

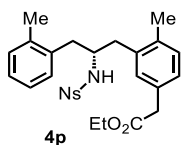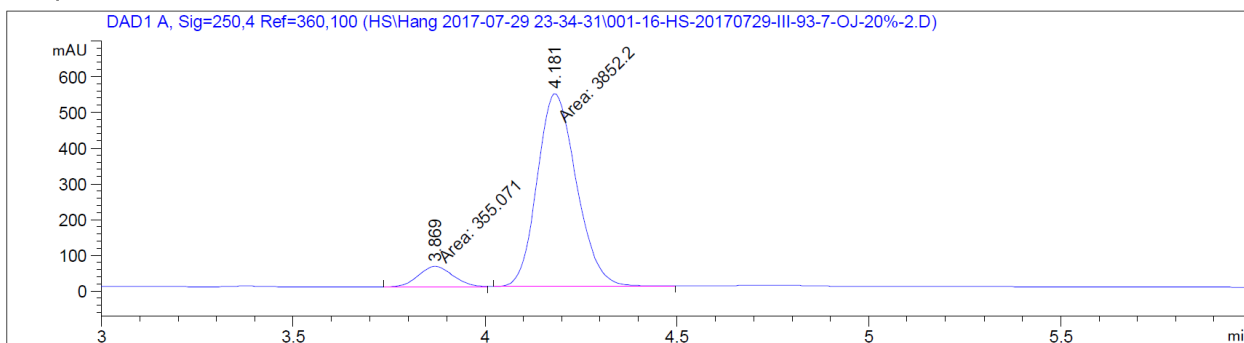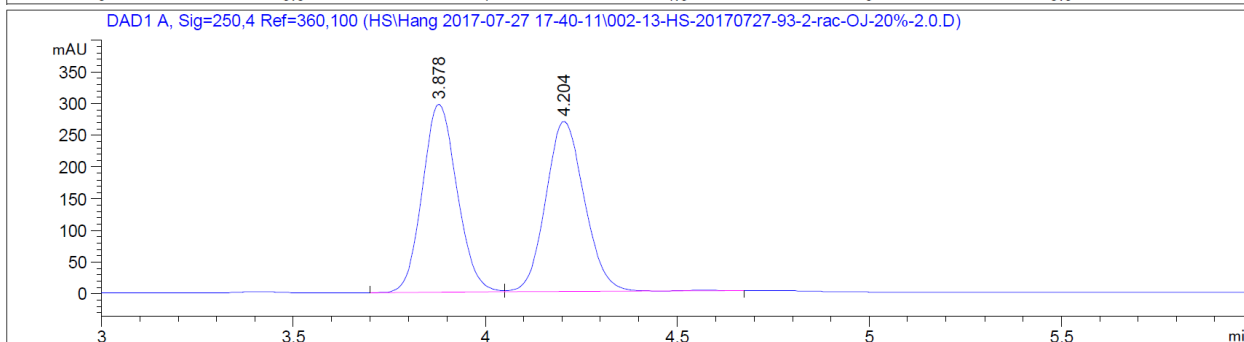

Signal 1: DAD1 A, Sig=250,4 Ref=360,100

| Peak # | RetTime [min] | Type | Width [min] | Area [mAU*s] | Height [mAU] | Area %  |
|--------|---------------|------|-------------|--------------|--------------|---------|
| 1      | 3.869         | MM   | 0.1042      | 355.07101    | 56.79617     | 8.4395  |
| 2      | 4.181         | MM   | 0.1187      | 3852.19800   | 541.02374    | 91.5605 |

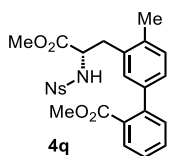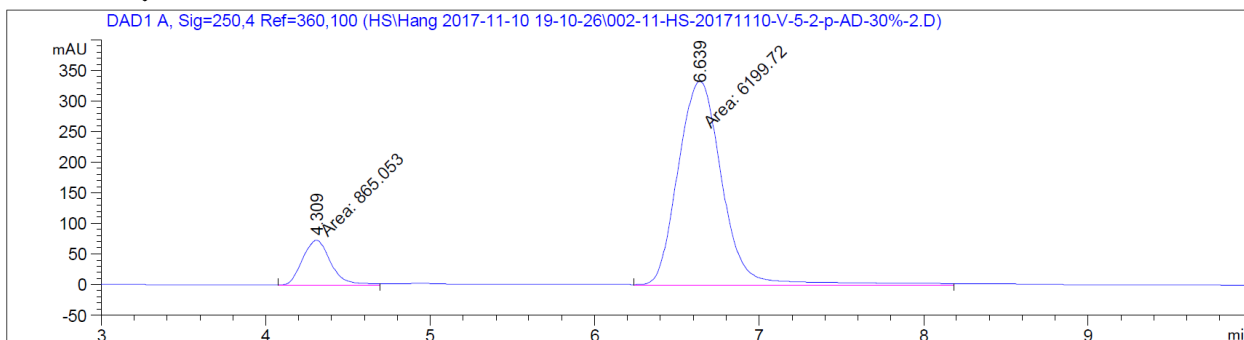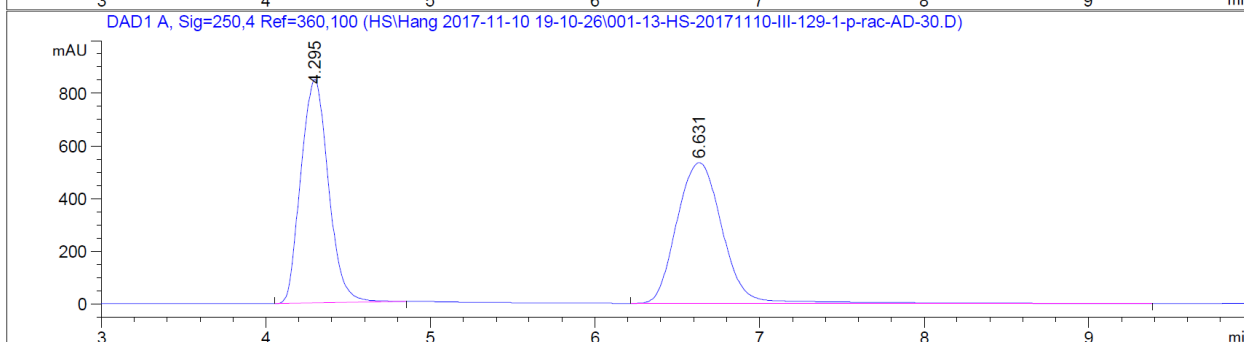

Signal 1: DAD1 A, Sig=250,4 Ref=360,100

| Peak # | RetTime [min] | Type | Width [min] | Area [mAU*s] | Height [mAU] | Area %  |
|--------|---------------|------|-------------|--------------|--------------|---------|
| 1      | 4.309         | MM   | 0.1973      | 865.05347    | 73.09028     | 12.2446 |
| 2      | 6.639         | MM   | 0.3105      | 6199.71631   | 332.83386    | 87.7554 |

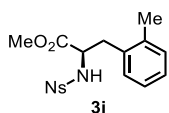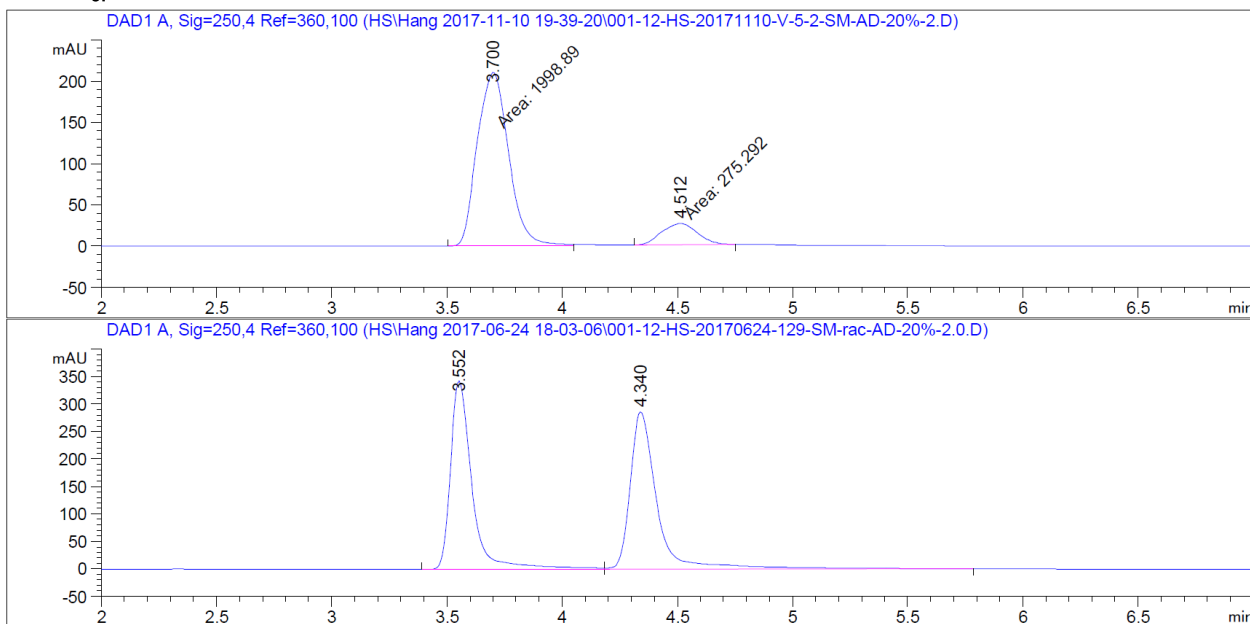

Signal 1: DAD1 A, Sig=250,4 Ref=360,100

| Peak # | RetTime [min] | Type | Width [min] | Area [mAU*s] | Height [mAU] | Area %  |
|--------|---------------|------|-------------|--------------|--------------|---------|
| 1      | 3.700         | MM   | 0.1579      | 1998.88965   | 211.03954    | 87.8949 |
| 2      | 4.512         | MM   | 0.1776      | 275.29227    | 25.83036     | 12.1051 |

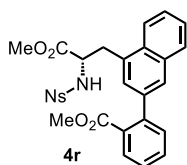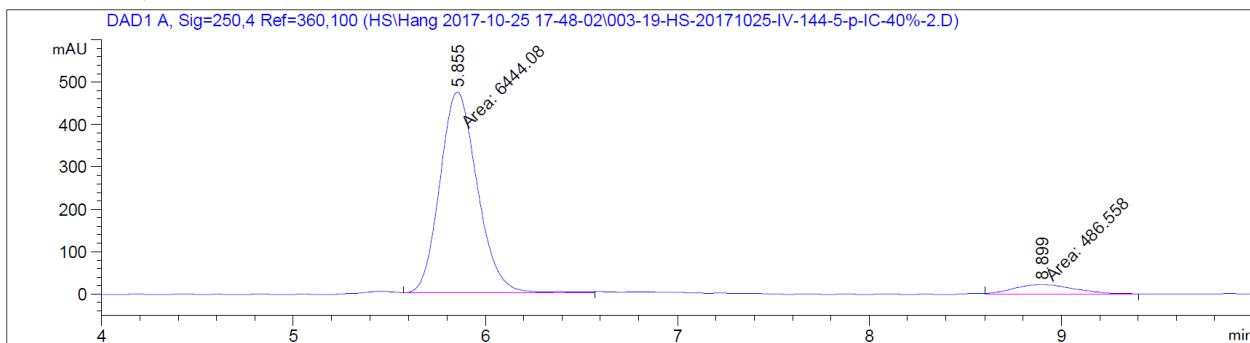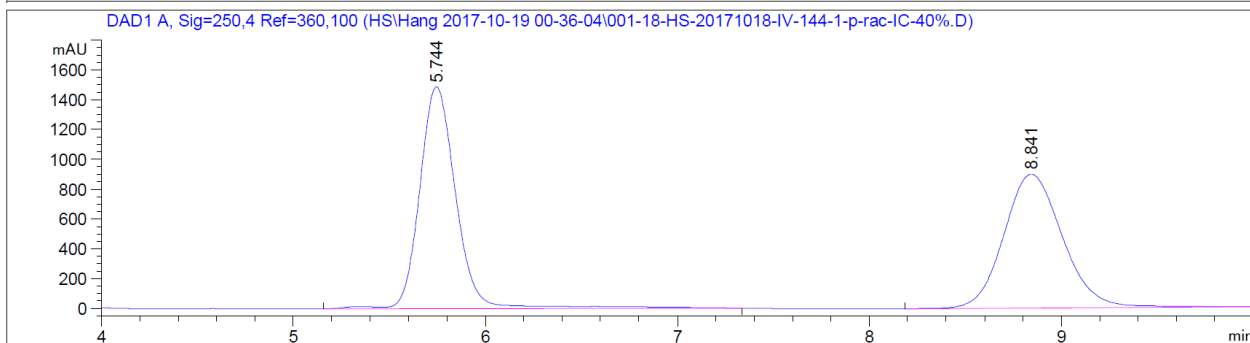

Signal 1: DAD1 A, Sig=250,4 Ref=360,100

| Peak # | RetTime [min] | Type | Width [min] | Area [mAU*s] | Height [mAU] | Area %  |
|--------|---------------|------|-------------|--------------|--------------|---------|
| 1      | 5.855         | MM   | 0.2266      | 6444.08398   | 473.91415    | 92.9796 |
| 2      | 8.899         | MM   | 0.3658      | 486.55807    | 22.16995     | 7.0204  |

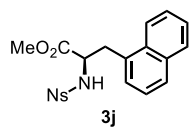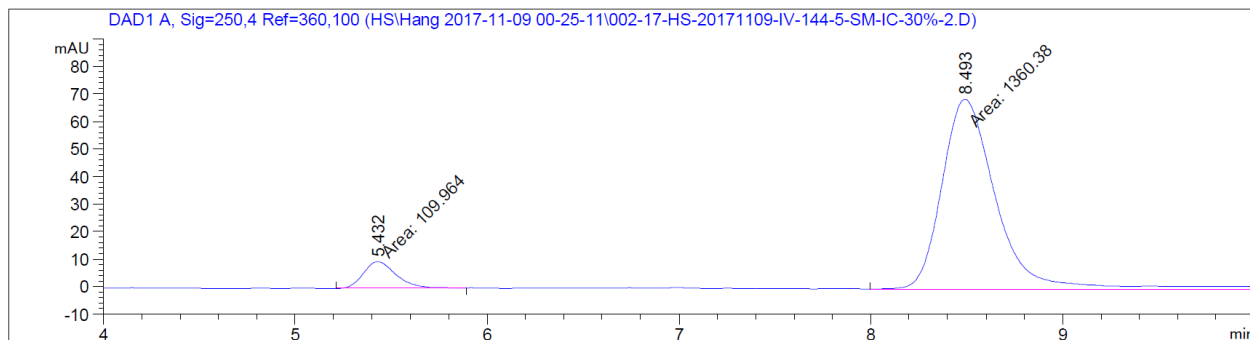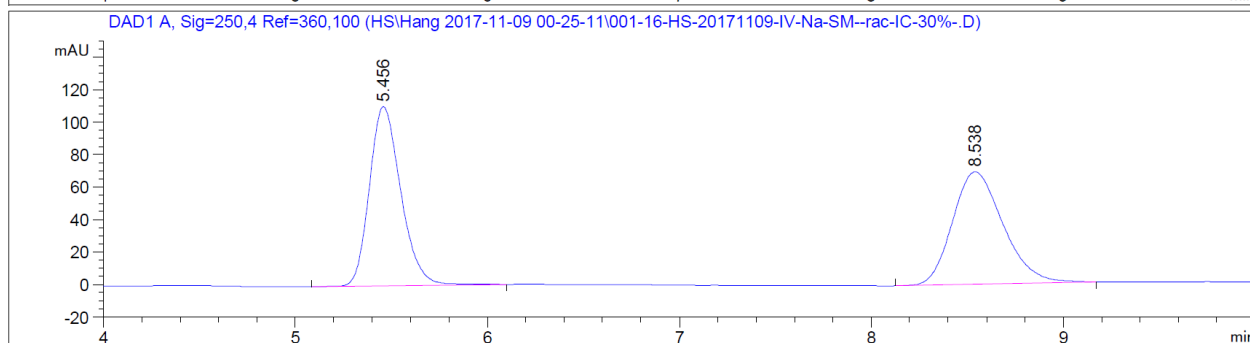

Signal 1: DAD1 A, Sig=250,4 Ref=360,100

| Peak # | RetTime [min] | Type | Width [min] | Area [mAU*s] | Height [mAU] | Area %  |
|--------|---------------|------|-------------|--------------|--------------|---------|
| 1      | 5.432         | MM   | 0.1920      | 109.96355    | 9.54492      | 7.4788  |
| 2      | 8.493         | MM   | 0.3289      | 1360.38098   | 68.94481     | 92.5212 |

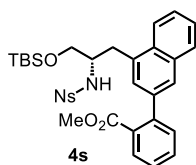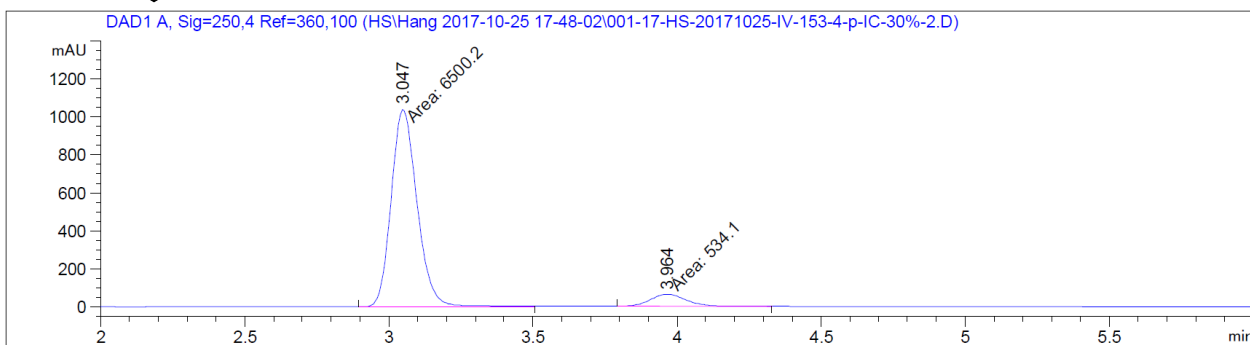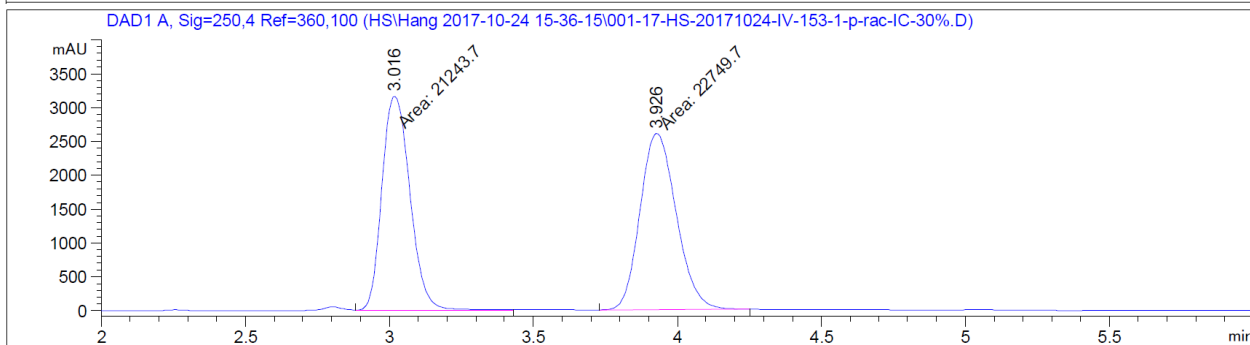

Signal 1: DAD1 A, Sig=250,4 Ref=360,100

| Peak # | RetTime [min] | Type | Width [min] | Area [mAU*s] | Height [mAU] | Area %  |
|--------|---------------|------|-------------|--------------|--------------|---------|
| 1      | 3.047         | MM   | 0.1041      | 6500.20361   | 1040.88354   | 92.4072 |
| 2      | 3.964         | MM   | 0.1421      | 534.09979    | 62.65053     | 7.5928  |



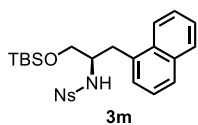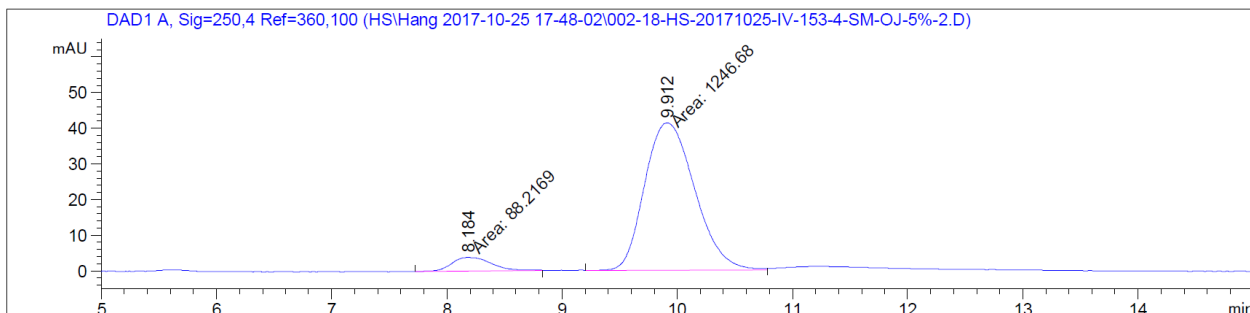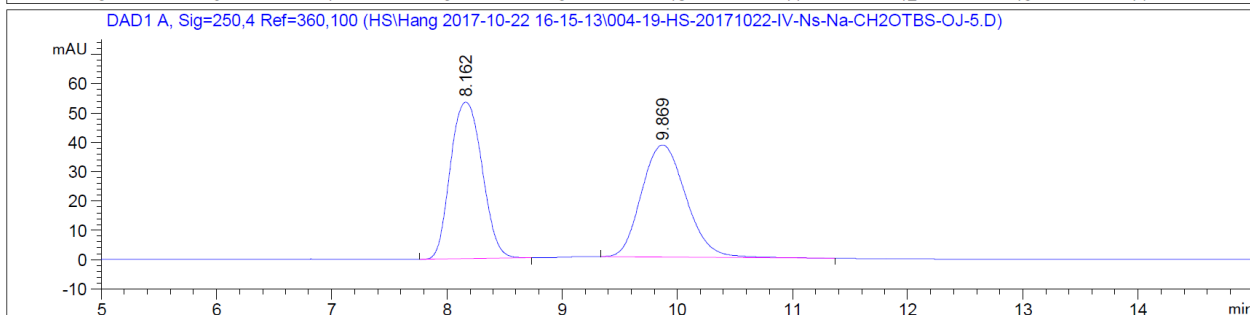

Signal 1: DAD1 A, Sig=250,4 Ref=360,100

| Peak # | RetTime [min] | Type | Width [min] | Area [mAU*s] | Height [mAU] | Area %  |
|--------|---------------|------|-------------|--------------|--------------|---------|
| 1      | 8.184         | MM   | 0.3906      | 88.21686     | 3.76424      | 6.6085  |
| 2      | 9.912         | MM   | 0.5032      | 1246.67957   | 41.29092     | 93.3915 |

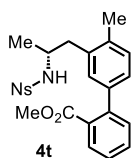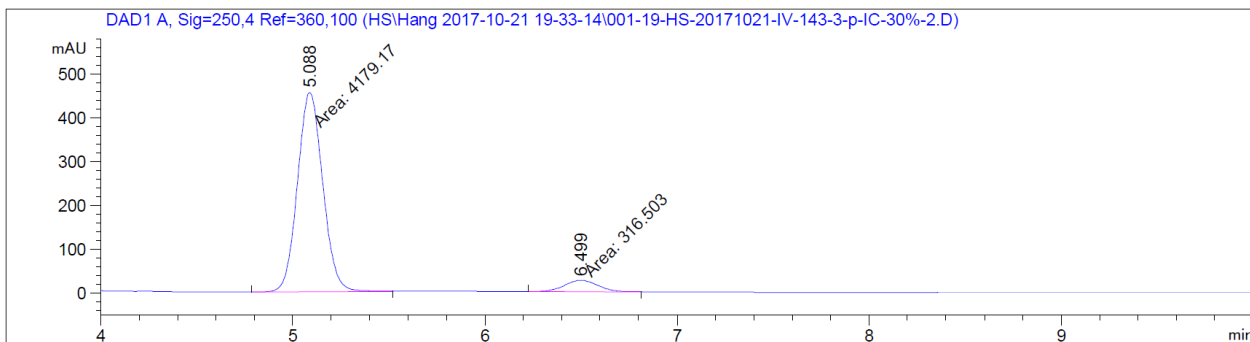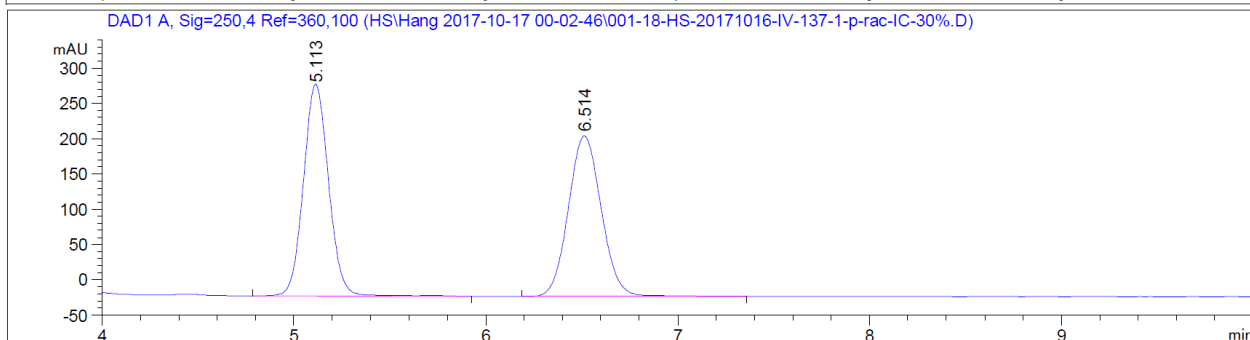

Signal 1: DAD1 A, Sig=250,4 Ref=360,100

| Peak # | RetTime [min] | Type | Width [min] | Area [mAU*s] | Height [mAU] | Area %  |
|--------|---------------|------|-------------|--------------|--------------|---------|
| 1      | 5.088         | MM   | 0.1528      | 4179.16943   | 455.88596    | 92.9598 |
| 2      | 6.499         | MM   | 0.2030      | 316.50284    | 25.98948     | 7.0402  |

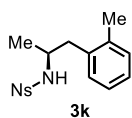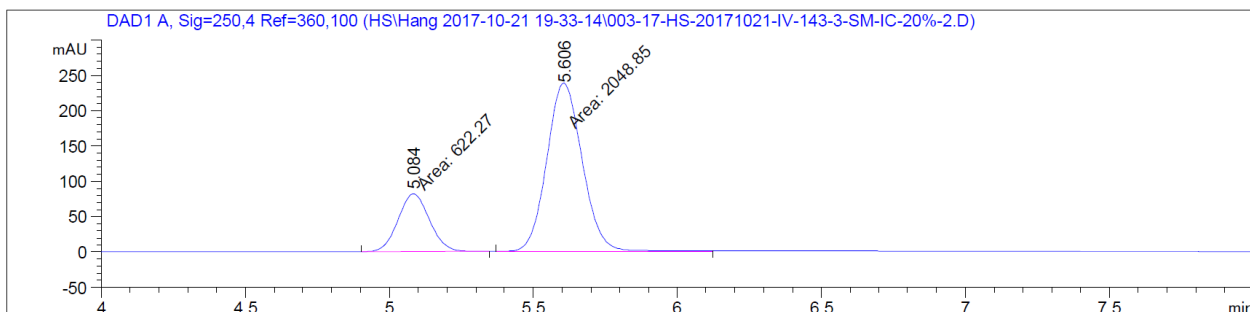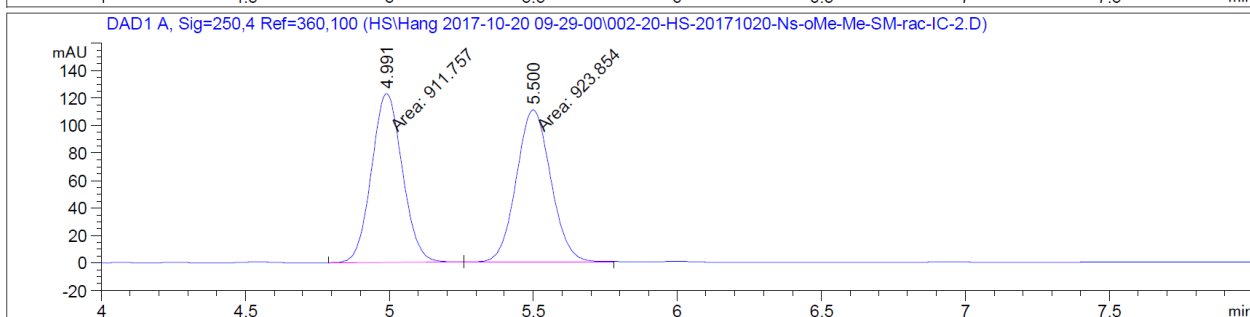

Signal 1: DAD1 A, Sig=250,4 Ref=360,100

| Peak # | RetTime [min] | Type | Width [min] | Area [mAU*s] | Height [mAU] | Area %  |
|--------|---------------|------|-------------|--------------|--------------|---------|
| 1      | 5.084         | MM   | 0.1267      | 622.26953    | 81.83183     | 23.2962 |
| 2      | 5.606         | MM   | 0.1432      | 2048.85010   | 238.52176    | 76.7038 |

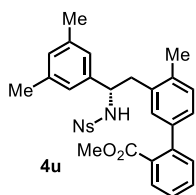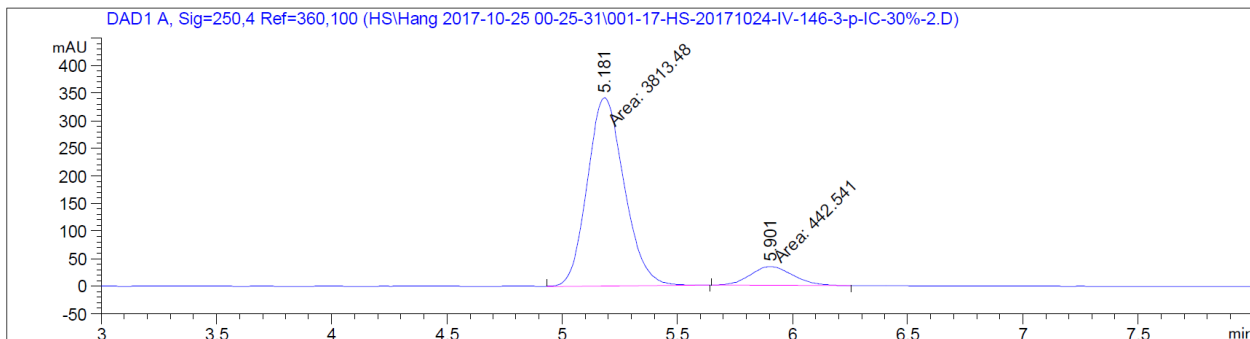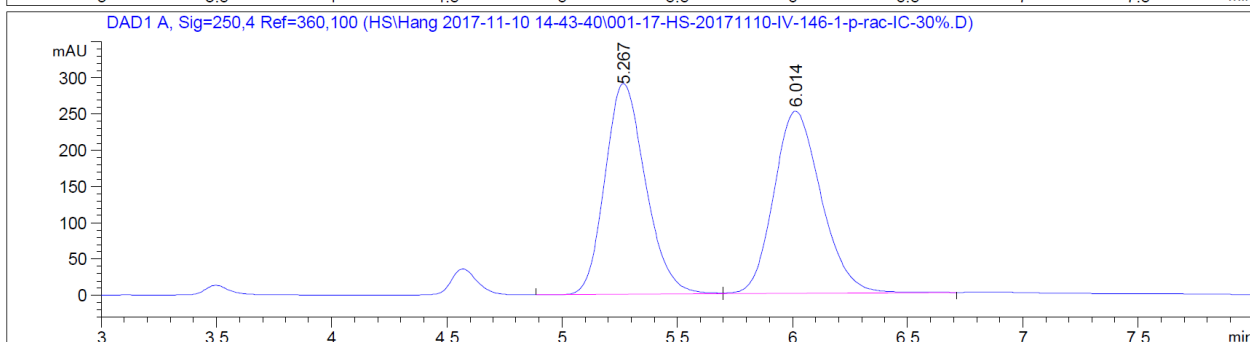

Signal 1: DAD1 A, Sig=250,4 Ref=360,100

| Peak # | RetTime [min] | Type | Width [min] | Area [mAU*s] | Height [mAU] | Area %  |
|--------|---------------|------|-------------|--------------|--------------|---------|
| 1      | 5.181         | MM   | 0.1861      | 3813.48438   | 341.60596    | 89.6020 |
| 2      | 5.901         | MM   | 0.2166      | 442.54083    | 34.05733     | 10.3980 |

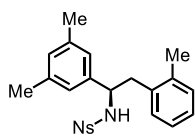

3n

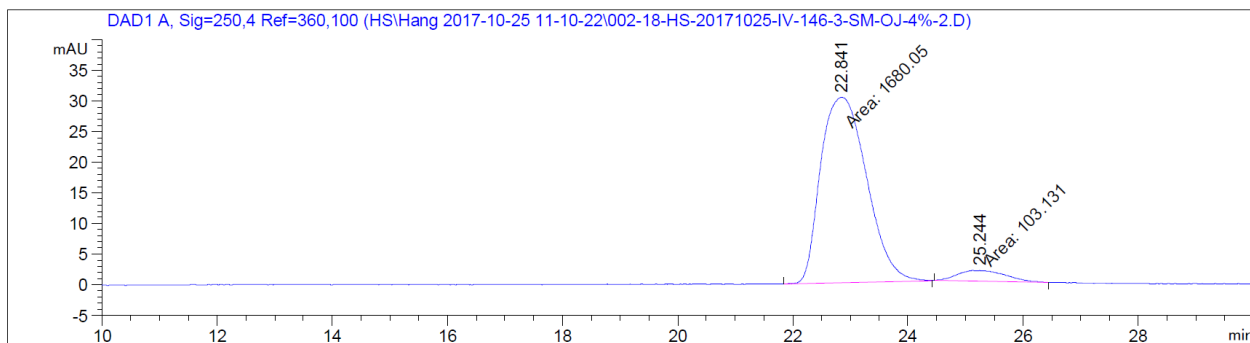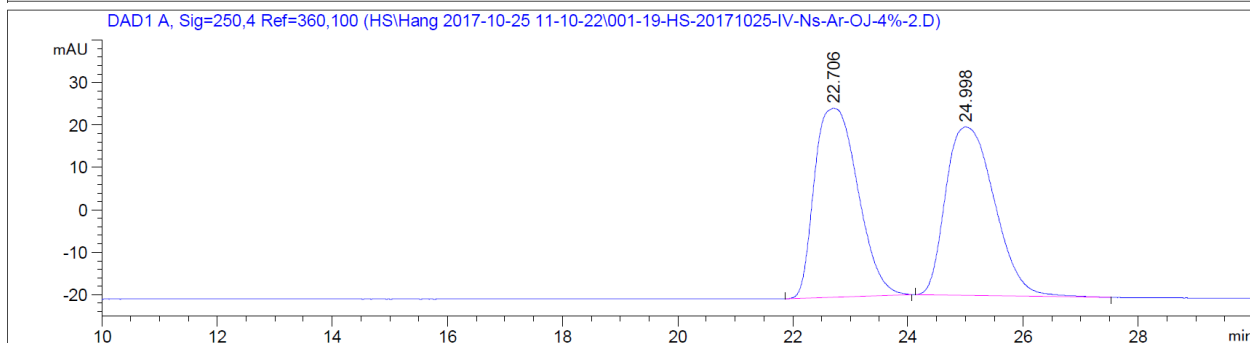

Signal 1: DAD1 A, Sig=250,4 Ref=360,100

| Peak # | RetTime [min] | Type | Width [min] | Area [mAU*s] | Height [mAU] | Area %  |
|--------|---------------|------|-------------|--------------|--------------|---------|
| 1      | 22.841        | MM   | 0.9240      | 1680.05347   | 30.30535     | 94.2165 |
| 2      | 25.244        | MM   | 0.9805      | 103.13062    | 1.75308      | 5.7835  |

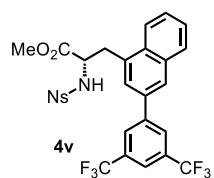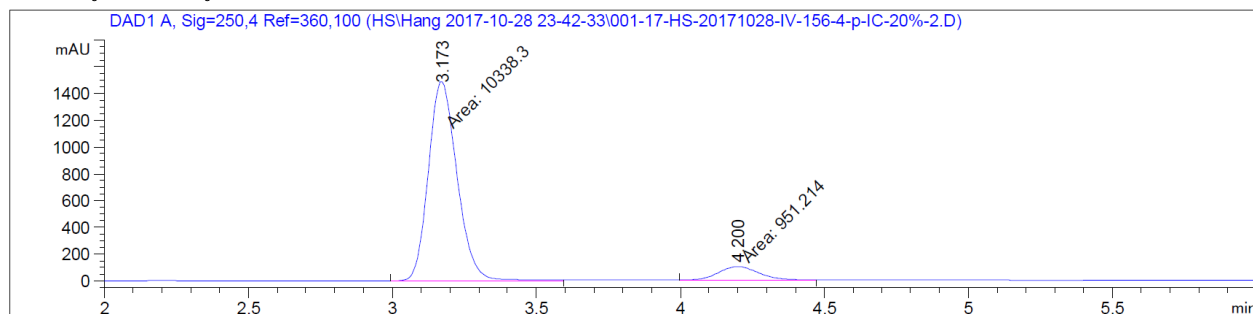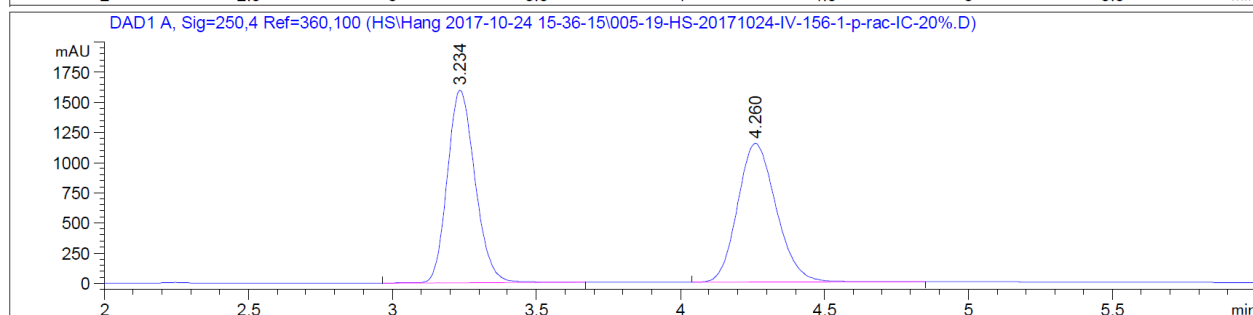

Signal 1: DAD1 A, Sig=250,4 Ref=360,100

| Peak # | RetTime [min] | Type | Width [min] | Area [mAU*s] | Height [mAU] | Area %  |
|--------|---------------|------|-------------|--------------|--------------|---------|
| 1      | 3.173         | MM   | 0.1155      | 1.03383e4    | 1491.61975   | 91.5744 |
| 2      | 4.200         | MM   | 0.1581      | 951.21368    | 100.26136    | 8.4256  |

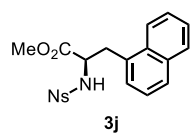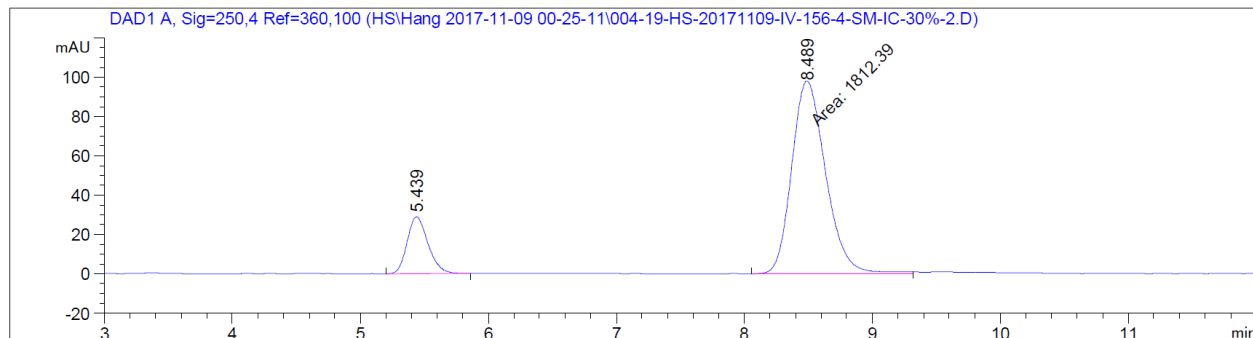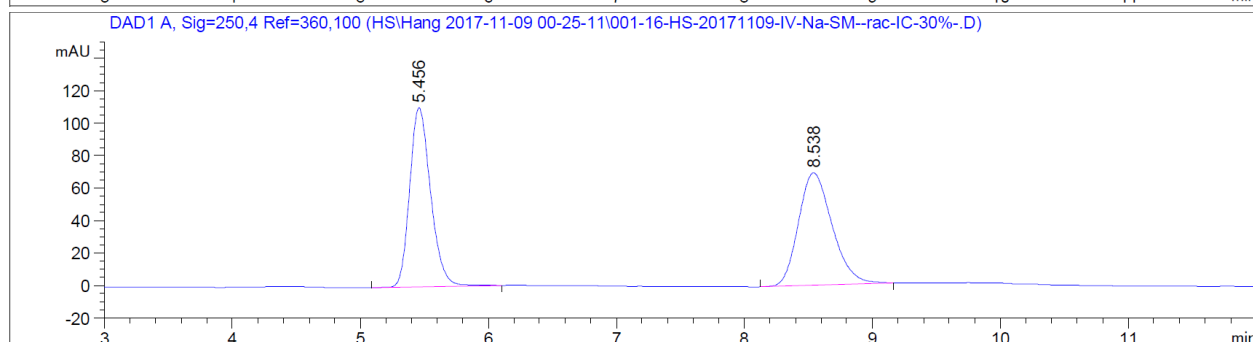

Signal 1: DAD1 A, Sig=250,4 Ref=360,100

| Peak # | RetTime [min] | Type | Width [min] | Area [mAU*s] | Height [mAU] | Area %  |
|--------|---------------|------|-------------|--------------|--------------|---------|
| 1      | 5.439         | BB   | 0.1743      | 327.99240    | 28.92523     | 15.3240 |
| 2      | 8.489         | MM   | 0.3077      | 1812.38513   | 98.16897     | 84.6760 |

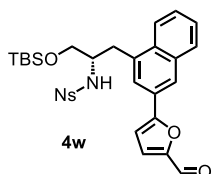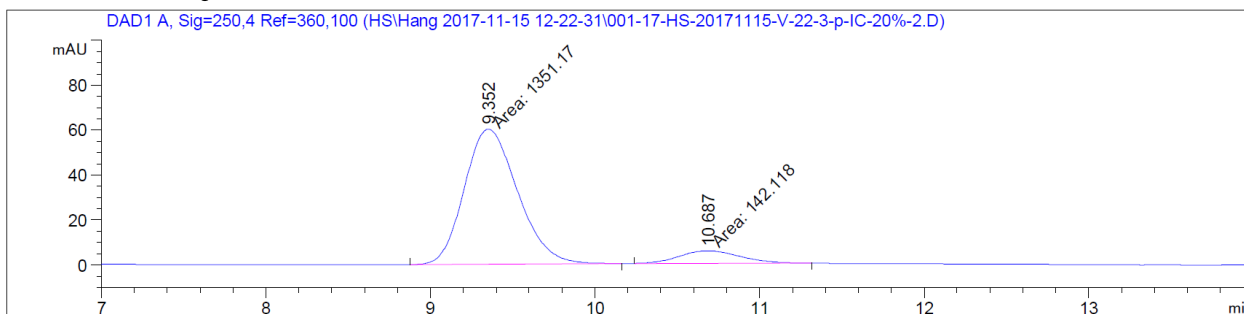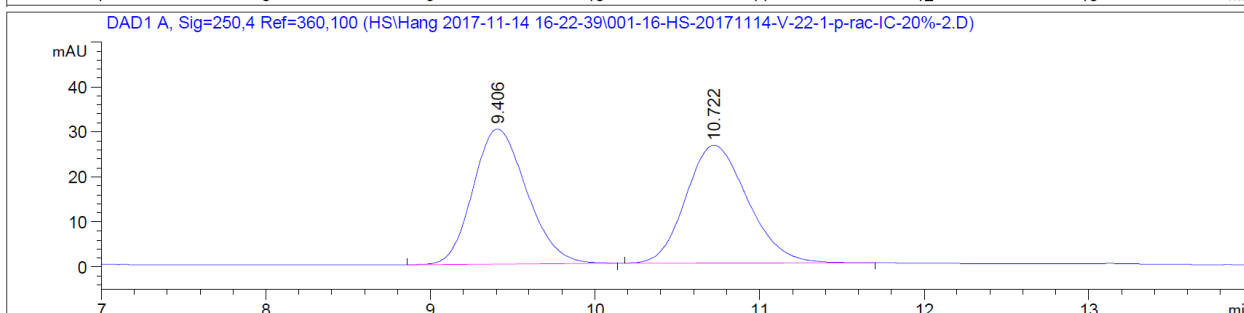

Signal 1: DAD1 A, Sig=250,4 Ref=360,100

| Peak # | RetTime [min] | Type | Width [min] | Area [mAU*s] | Height [mAU] | Area %  |
|--------|---------------|------|-------------|--------------|--------------|---------|
| 1      | 9.352         | MM   | 0.3749      | 1351.17456   | 60.07418     | 90.4829 |
| 2      | 10.687        | MM   | 0.4269      | 142.11836    | 5.54905      | 9.5171  |



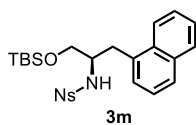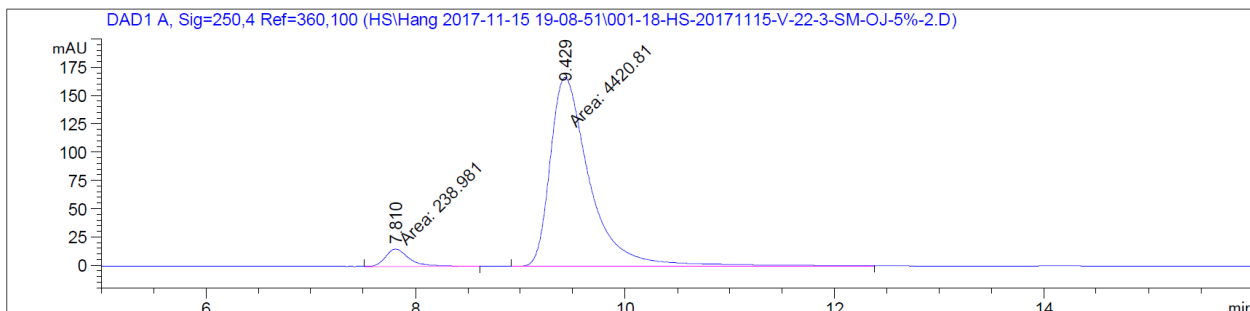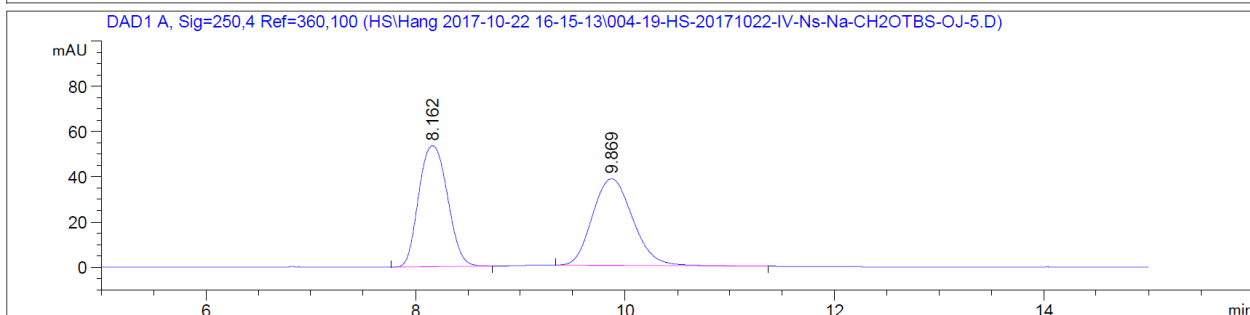

Signal 1: DAD1 A, Sig=250,4 Ref=360,100

| Peak # | RetTime [min] | Type | Width [min] | Area [mAU*s] | Height [mAU] | Area %  |
|--------|---------------|------|-------------|--------------|--------------|---------|
| 1      | 7.810         | MM   | 0.2600      | 238.98119    | 15.32124     | 5.1286  |
| 2      | 9.429         | MM   | 0.4416      | 4420.81201   | 166.84232    | 94.8714 |

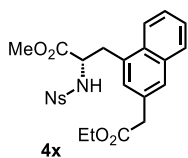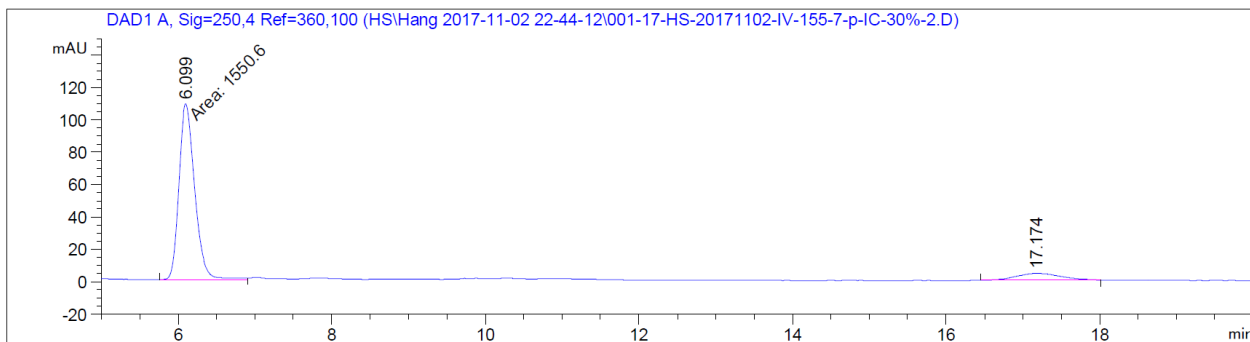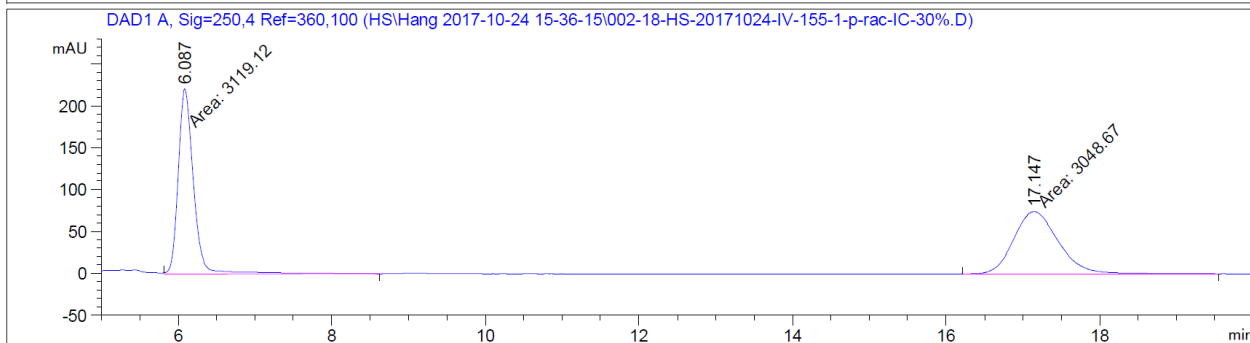

Signal 1: DAD1 A, Sig=250,4 Ref=360,100

| Peak # | RetTime [min] | Type | Width [min] | Area [mAU*s] | Height [mAU] | Area %  |
|--------|---------------|------|-------------|--------------|--------------|---------|
| 1      | 6.099         | MM   | 0.2380      | 1550.60046   | 108.56999    | 90.0303 |
| 2      | 17.174        | BB   | 0.4969      | 171.70859    | 4.27254      | 9.9697  |

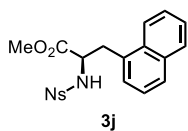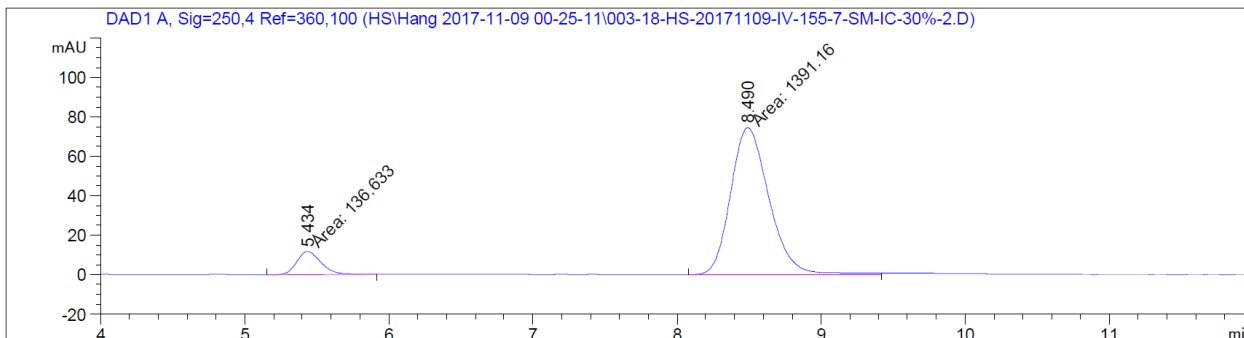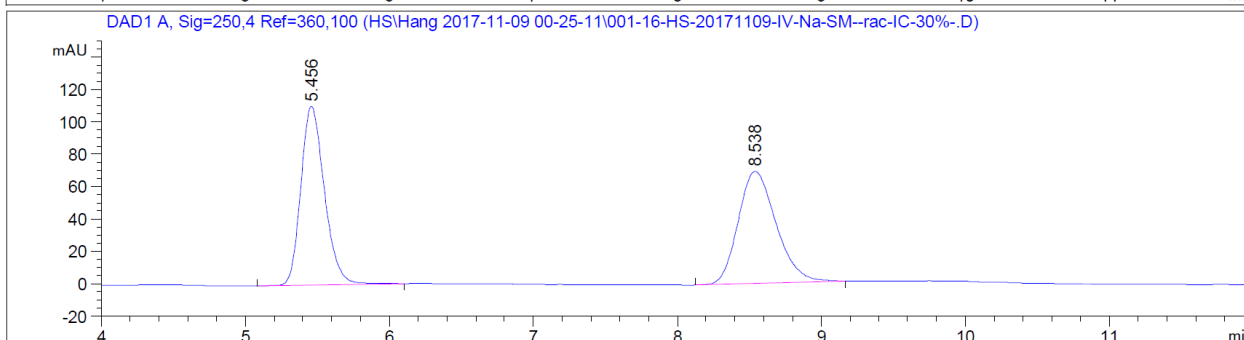

Signal 1: DAD1 A, Sig=250,4 Ref=360,100

| Peak # | RetTime [min] | Type | Width [min] | Area [mAU*s] | Height [mAU] | Area %  |
|--------|---------------|------|-------------|--------------|--------------|---------|
| 1      | 5.434         | MM   | 0.1939      | 136.63313    | 11.74363     | 8.9432  |
| 2      | 8.490         | MM   | 0.3110      | 1391.15540   | 74.56083     | 91.0568 |

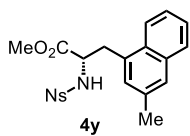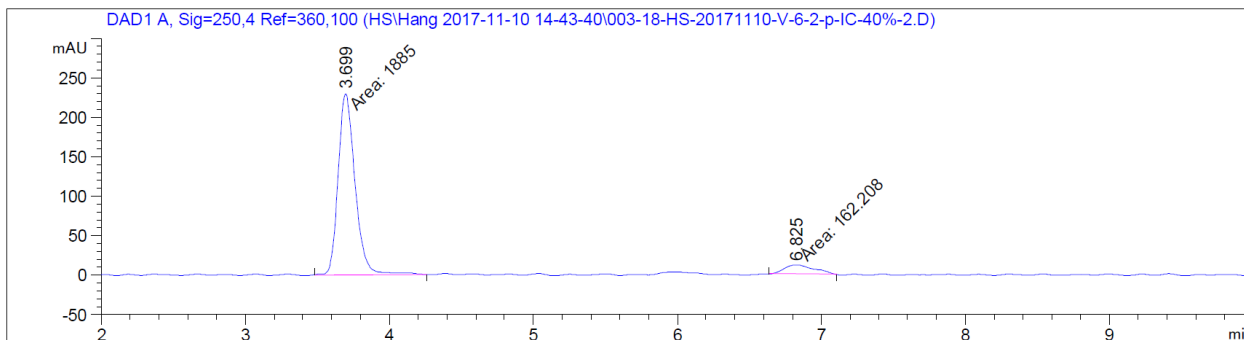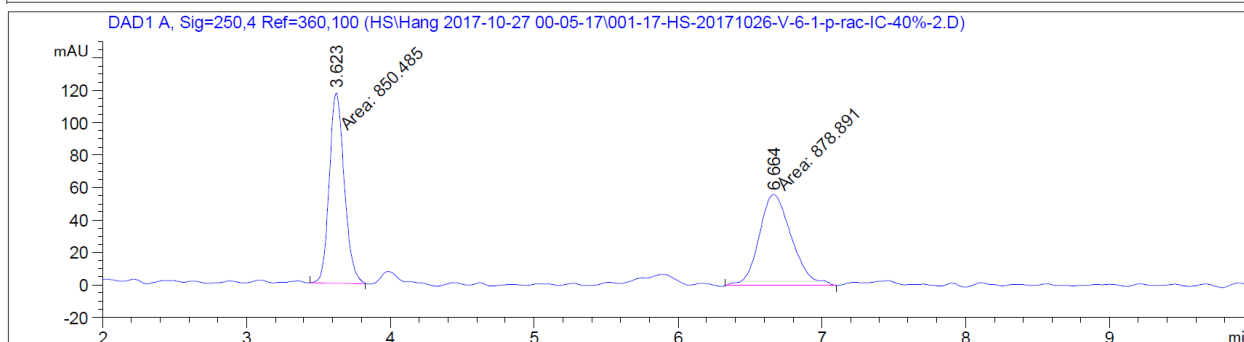

Signal 1: DAD1 A, Sig=250,4 Ref=360,100

| Peak # | RetTime [min] | Type | Width [min] | Area [mAU*s] | Height [mAU] | Area %  |
|--------|---------------|------|-------------|--------------|--------------|---------|
| 1      | 3.699         | MM   | 0.1366      | 1884.99915   | 230.05949    | 92.0766 |
| 2      | 6.825         | MM   | 0.2376      | 162.20778    | 11.37620     | 7.9234  |

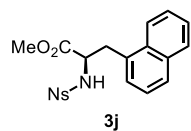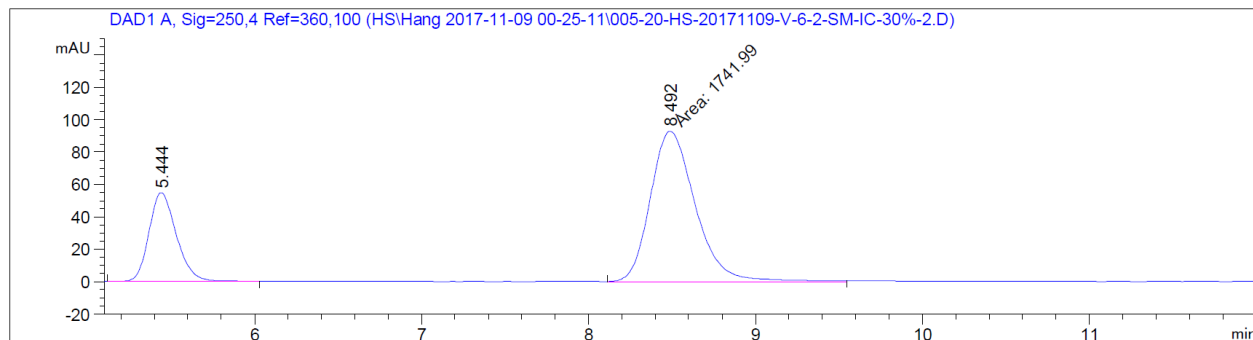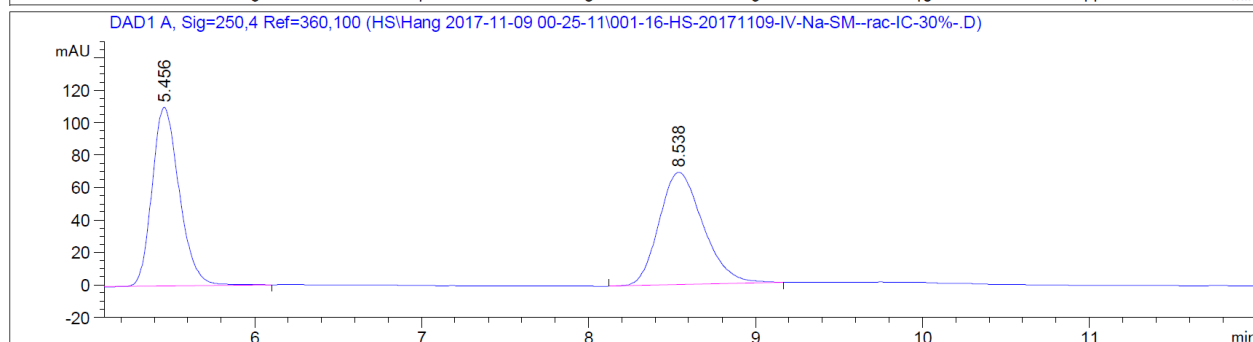

Signal 1: DAD1 A, Sig=250,4 Ref=360,100

| Peak # | RetTime [min] | Type | Width [min] | Area [mAU*s] | Height [mAU] | Area %  |
|--------|---------------|------|-------------|--------------|--------------|---------|
| 1      | 5.444         | BB   | 0.1743      | 619.92261    | 54.67658     | 26.2467 |
| 2      | 8.492         | MM   | 0.3125      | 1741.98792   | 92.92081     | 73.7533 |

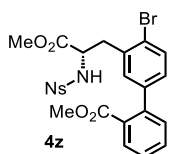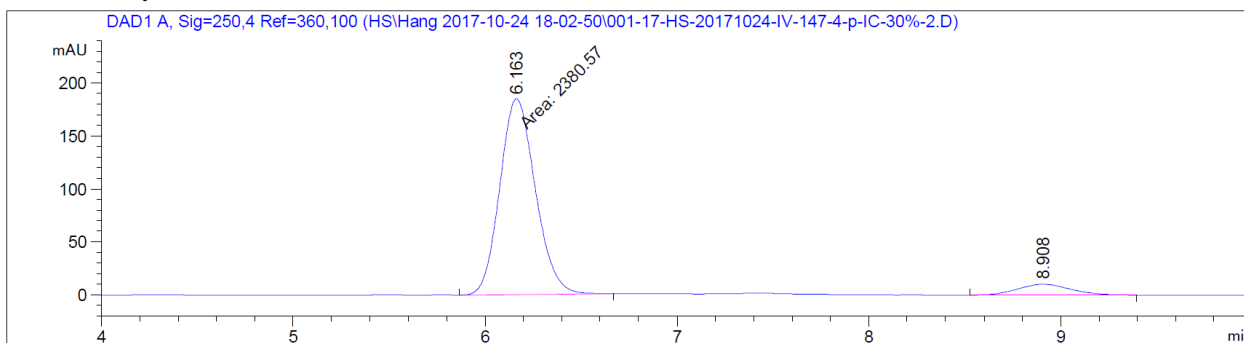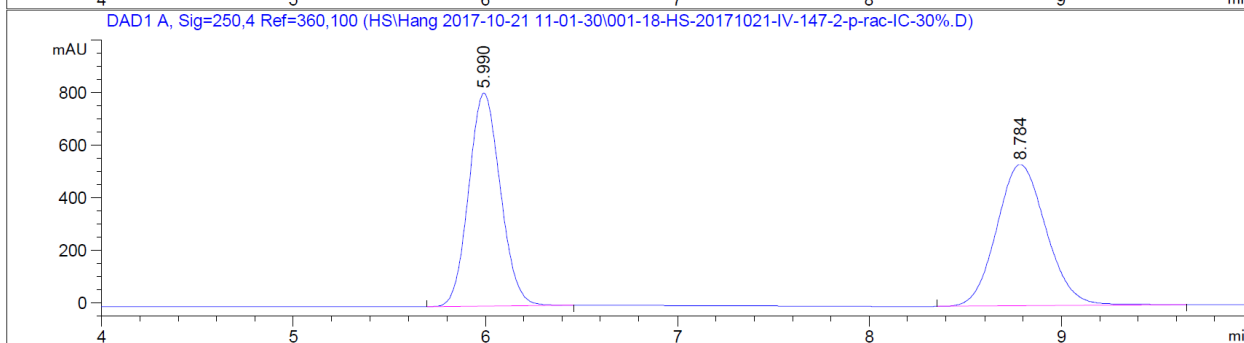

Signal 1: DAD1 A, Sig=250,4 Ref=360,100

| Peak # | RetTime [min] | Type | Width [min] | Area [mAU*s] | Height [mAU] | Area %  |
|--------|---------------|------|-------------|--------------|--------------|---------|
| 1      | 6.163         | MM   | 0.2145      | 2380.57056   | 184.94643    | 92.3810 |
| 2      | 8.908         | BB   | 0.3025      | 196.33482    | 10.20089     | 7.6190  |

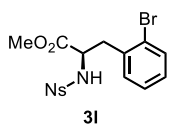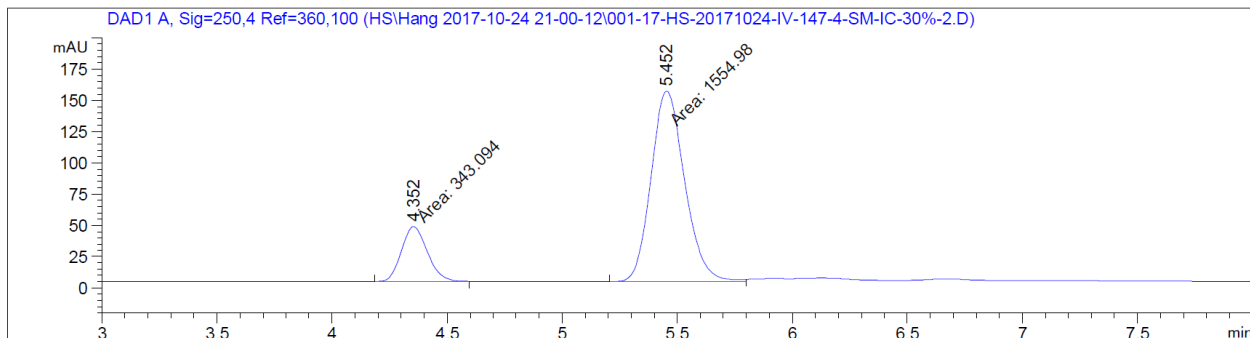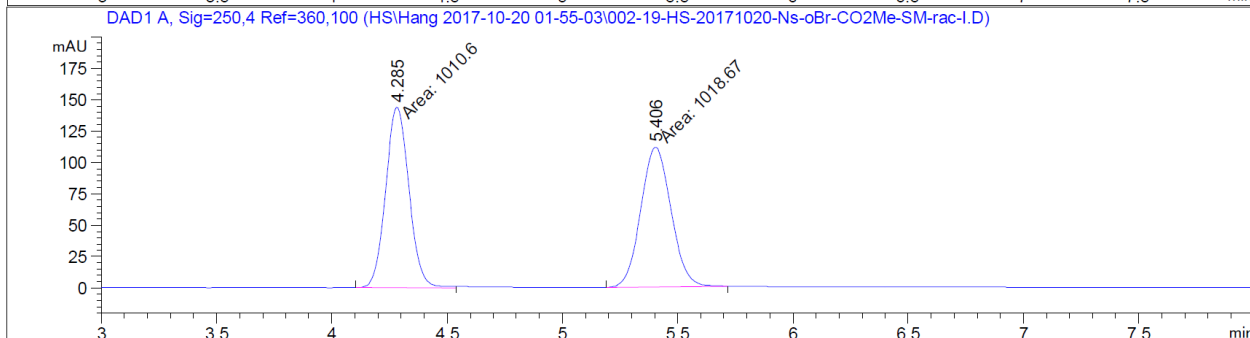

Signal 1: DAD1 A, Sig=250,4 Ref=360,100

| Peak # | RetTime [min] | Type | Width [min] | Area [mAU*s] | Height [mAU] | Area %  |
|--------|---------------|------|-------------|--------------|--------------|---------|
| 1      | 4.352         | MM   | 0.1299      | 343.09421    | 44.03119     | 18.0759 |
| 2      | 5.452         | MM   | 0.1697      | 1554.98279   | 152.74278    | 81.9241 |

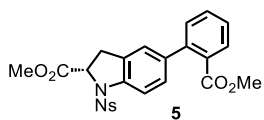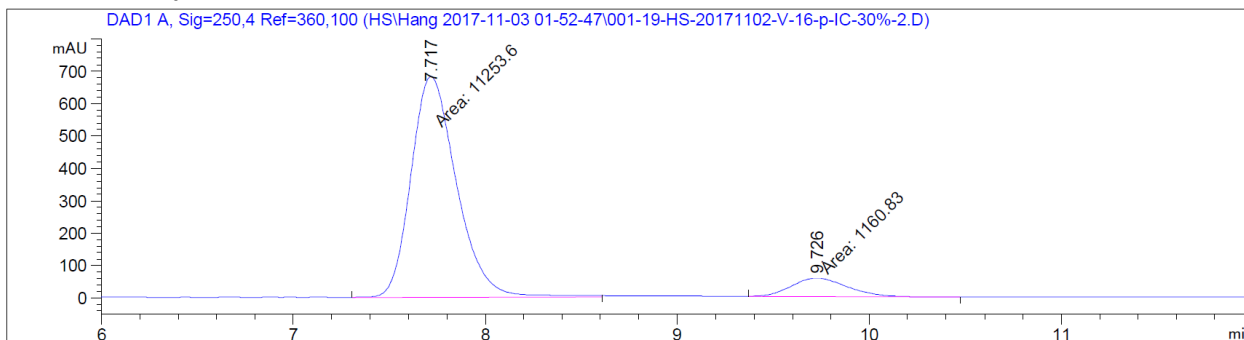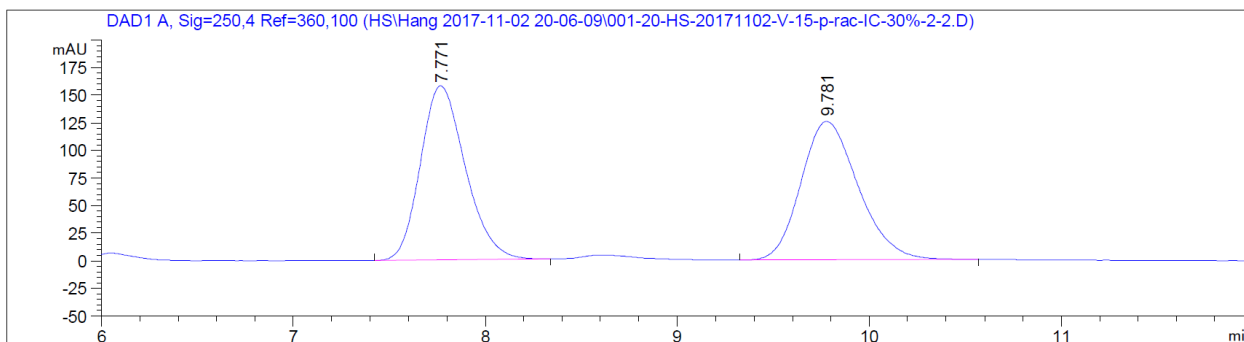

Signal 1: DAD1 A, Sig=250,4 Ref=360,100

| Peak # | RetTime [min] | Type | Width [min] | Area [mAU*s] | Height [mAU] | Area %  |
|--------|---------------|------|-------------|--------------|--------------|---------|
| 1      | 7.717         | MM   | 0.2747      | 1.12536e4    | 682.73999    | 90.6493 |
| 2      | 9.726         | MM   | 0.3379      | 1160.83484   | 57.26508     | 9.3507  |



**REFERENCES**

34. Bolm, C., Schiffrers, I., Dinter, C. L. & Gerlach, A. Practical and highly enantioselective ring opening of cyclic *meso*-anhydrides mediated by cinchona alkaloids. *J. Org. Chem.* **65**, 6984–6991 (2000).
35. Youk, S. H., Oh, S. H., Rho, Ho S., Lee, J. E., Lee, J. W. & Song, C. E. A polymer-supported *Cinchona*-based bifunctional sulfonamide catalyst: a highly enantioselective, recyclable heterogeneous organocatalyst. *Chem. Commun.* 2220–2222 (2009).
36. Wang, P., Li, G.-C., Jain, P., Farmer, M. E., He, J., Shen, P.-X. & Yu, J.-Q. Ligand-promoted *meta*-C–H amination and alkynylation. *J. Am. Chem. Soc.* **138**, 14092–14099 (2016).
37. Chu, L., Wang, X.-C., Moore, C. E., Rheingold, A. L. & Yu, J.-Q. Pd-catalyzed enantioselective C–H iodination: asymmetric synthesis of chiral diarylmethylamines. *J. Am. Chem. Soc.* **135**, 16344–16347 (2013).
38. Dastbaravardeh, N., Schngrch, M. & Mihovilovic, M. D. Ruthenium(0)-catalyzed  $sp^3$  C–H bond arylation of benzylic amines using arylboronates. *Org. Lett.* **14**, 1930–1933 (2012).
39. Resendiz, M. J. E. & Garcia-Garibay, M. A. Hammett analysis of photodecarbonylation in crystalline 1,3-diarylacetonates. *Org. Lett.* **7**, 371–374 (2005).
